# Supplementary material for: Single-cell profiling of trabecular meshwork identifies mitochondrial dysfunction in a glaucoma model that is protected by vitamin B3 treatment
Source: eLife. 2026 Jan 20;14:RP107161. doi: 10.7554/eLife.107161 (PMC12818872; doi:10.7554/eLife.107161)
Supplement: Supplementary file 1. [file elife-107161-supp1.xlsx]

## Sheet: File 1
Group	TM_subtype	Category	ID	Description	GeneRatio	BgRatio	pvalue	p.adjust	qvalue	geneID	Count	Overlap_with_Columbia
TM1_BP_GO:0000302	TM1	BP	GO:0000302	response to reactive oxygen species	19/693	190/17051	0.000278428	0.00277186	0.00194695	21825/23876/11815/20657/17390/11826/15251/12955/14281/21336/11758/13078/16476/16952/16410/18477/15505/18595/15234	19	Yes
TM1_BP_GO:0001101	TM1	BP	GO:0001101	response to acid chemical	15/693	97/17051	8.19e-06	0.000144544	0.000101528	12843/12842/107581/17392/17390/12833/20194/14658/54635/12583/12832/12608/12306/18595/16598	15	No
TM1_BP_GO:0001501	TM1	BP	GO:0001501	skeletal system development	75/693	474/17051	1.37e-24	1.68e-21	1.18e-21	12843/20692/21825/12111/12842/16007/17926/20319/11647/14313/20377/19035/18933/17390/18162/13038/15211/232174/216616/17242/14219/15251/20204/15530/20289/21808/110075/12845/12643/21809/18590/27973/30953/14451/21803/218772/12167/16998/22160/13601/12406/54635/12832/17132/14042/16854/17313/102866/12394/14043/14172/17131/15212/18121/73121/21834/18133/20682/233328/80707/21813/231070/16000/13386/14683/22…	75	Yes
TM1_BP_GO:0001503	TM1	BP	GO:0001503	ossification	64/693	370/17051	3.14e-23	3.08e-20	2.16e-20	12843/16011/12842/16007/17926/20256/68713/20319/11647/14758/27047/20377/17390/14734/14362/17242/15081/14219/15251/15530/20289/12609/110075/12845/100038882/21803/12167/16998/22160/13601/16477/14042/16478/21336/17313/12394/14043/11732/66695/14172/26427/17131/21847/18121/73121/21834/20682/80707/50766/12608/22411/381629/16000/13386/14683/22418/68588/17300/68010/20148/94249/17387/19219/18605	64	Yes
TM1_BP_GO:0001523	TM1	BP	GO:0001523	retinoid metabolic process	8/693	52/17051	0.0011046	0.00831496	0.00584041	19659/232174/13078/71660/11668/19378/20148/13082	8	No
TM1_BP_GO:0001558	TM1	BP	GO:0001558	regulation of cell growth	42/693	413/17051	4.57e-08	1.64e-06	1.15e-06	14268/16011/20315/20564/20319/13640/22403/20377/16010/17756/232441/15200/12955/72269/21808/20356/18208/20563/14451/21803/11787/17131/20346/18133/19063/76863/18186/27279/22411/16000/74116/22418/12053/12934/11739/14199/67866/17387/12505/18605/13057/66102	42	Yes
TM1_BP_GO:0001569	TM1	BP	GO:0001569	branching involved in blood vessel morphogenesis	8/693	42/17051	0.000247607	0.00250568	0.00175998	20315/20319/17242/20356/18186/21813/11600/13617	8	No
TM1_BP_GO:0001570	TM1	BP	GO:0001570	vasculogenesis	12/693	91/17051	0.000307442	0.00301183	0.0021155	54409/67888/22762/21803/16477/18186/21813/11600/27494/71602/12192/77446	12	Yes
TM1_BP_GO:0001649	TM1	BP	GO:0001649	osteoblast differentiation	28/693	193/17051	4.82e-09	2.32e-07	1.63e-07	16011/12842/16007/17926/20319/20377/14362/15081/12609/110075/12167/22160/16477/16478/26427/18121/20682/80707/50766/12608/22411/381629/16000/13386/14683/68588/68010/19219	28	Yes
TM1_BP_GO:0001654	TM1	BP	GO:0001654	eye development	45/693	385/17051	1.81e-10	1.39e-08	9.75e-09	329941/12215/12837/14107/11826/15251/12955/21808/24136/14451/21803/218772/12167/22160/12832/17132/80837/14165/18081/12288/242022/14238/330222/27419/13078/16476/21834/20482/23928/11668/20682/12831/18186/21813/50530/16779/17150/18595/12628/114142/17300/22352/19378/29876/77579	45	Yes
TM1_BP_GO:0001655	TM1	BP	GO:0001655	urogenital system development	54/693	350/17051	1.89e-17	1.55e-14	1.09e-14	20317/18993/18654/73230/20377/17390/11826/14734/12829/18027/21808/18590/11421/20563/30953/21803/218772/14042/14165/11601/70350/12828/74055/11504/242022/17131/14573/18121/12931/20682/16952/110350/18186/13653/22411/16000/11600/71602/94275/22418/18552/16779/231470/23908/18595/21923/12628/17300/11835/19378/13617/14118/83675/12505	54	Yes
TM1_BP_GO:0001656	TM1	BP	GO:0001656	metanephros development	13/693	83/17051	2.83e-05	0.000425938	0.000299178	18993/11826/14734/18590/20563/14165/14573/20682/13653/16779/231470/18595/14118	13	No
TM1_BP_GO:0001657	TM1	BP	GO:0001657	ureteric bud development	16/693	96/17051	1.49e-06	3.34e-05	2.34e-05	18654/73230/20377/14734/20563/21803/218772/17131/14573/18121/12931/20682/94275/23908/17300/12505	16	Yes
TM1_BP_GO:0001666	TM1	BP	GO:0001666	response to hypoxia	23/693	200/17051	7e-06	0.000127764	8.97e-05	67749/11670/19223/18654/11931/20657/17390/11826/15251/12955/21808/21809/11539/22160/16526/13653/246154/68655/12192/22027/16531/13617/230857	23	Yes
TM1_BP_GO:0001667	TM1	BP	GO:0001667	ameboidal-type cell migration	59/693	417/17051	3.84e-17	2.47e-14	1.73e-14	14268/13179/20317/20692/21825/20315/68792/114886/13616/13036/17311/11819/12215/67916/73230/12558/68813/11826/15251/15200/21808/20971/56332/20356/21983/24136/20563/30953/21803/22160/21336/80837/14165/18787/11601/14645/14172/11857/13078/16476/20346/14573/18133/20682/16952/16410/11881/18186/21813/22411/16000/11600/27494/22418/83397/15370/21857/14389/18187	59	Yes
TM1_BP_GO:0001704	TM1	BP	GO:0001704	formation of primary germ layer	14/693	91/17051	1.73e-05	0.000275987	0.000193852	14268/12816/20319/20289/68151/12832/14043/18121/16410/12831/22411/19252/22418/17300	14	No
TM1_BP_GO:0001706	TM1	BP	GO:0001706	endoderm formation	7/693	35/17051	0.000441839	0.00400101	0.0028103	14268/12816/12832/18121/16410/12831/19252	7	No
TM1_BP_GO:0001736	TM1	BP	GO:0001736	establishment of planar polarity	9/693	61/17051	0.000750279	0.00609664	0.00428226	20319/20377/14734/14362/14238/69217/22411/22418/68588	9	No
TM1_BP_GO:0001755	TM1	BP	GO:0001755	neural crest cell migration	11/693	56/17051	1.29e-05	0.000214498	0.000150663	14268/13616/17311/15251/20356/24136/22160/20346/14573/18186/18187	11	Yes
TM1_BP_GO:0001763	TM1	BP	GO:0001763	morphogenesis of a branching structure	36/693	229/17051	2.77e-12	3.6e-10	2.53e-10	20315/13036/20319/18654/20377/14734/17242/20356/18590/20563/21803/57764/14042/14165/17313/20346/14573/18121/21817/20682/18186/21813/16000/11600/94275/64138/22418/72780/18595/21923/11835/29876/13617/15234/17387/12505	36	Yes
TM1_BP_GO:0001764	TM1	BP	GO:0001764	neuron migration	18/693	181/17051	0.0004268	0.00388633	0.00272975	14456/20315/11819/13865/17242/319387/18208/12386/22160/11787/20346/80883/18186/399558/13175/18187/77579/19091	18	No
TM1_BP_GO:0001818	TM1	BP	GO:0001818	negative regulation of cytokine production	26/693	260/17051	2.27e-05	0.000353154	0.000248055	14268/21825/14456/11815/21808/21809/21803/74155/22160/19122/109815/12509/17131/14114/16952/20312/22411/16000/11600/12053/77125/16598/16803/15234/22695/19219	26	Yes
TM1_BP_GO:0001819	TM1	BP	GO:0001819	positive regulation of cytokine production	32/693	424/17051	0.000598479	0.00509954	0.00358191	12759/21825/17022/12215/18708/50706/17242/15251/11820/21803/22160/20742/12394/18787/13078/16952/20312/12608/13653/16362/22411/13386/22418/77125/83397/18578/16803/15234/77446/17319/19219/13057	32	Yes
TM1_BP_GO:0001822	TM1	BP	GO:0001822	kidney development	46/693	297/17051	4.25e-15	1.06e-12	7.47e-13	18993/18654/73230/20377/11826/14734/12829/21808/18590/11421/20563/30953/21803/218772/14042/14165/11601/70350/12828/74055/11504/242022/17131/14573/18121/12931/20682/110350/18186/13653/22411/11600/71602/94275/22418/18552/16779/231470/23908/18595/12628/17300/13617/14118/83675/12505	46	Yes
TM1_BP_GO:0001823	TM1	BP	GO:0001823	mesonephros development	16/693	99/17051	2.27e-06	4.86e-05	3.41e-05	18654/73230/20377/14734/20563/21803/218772/17131/14573/18121/12931/20682/94275/23908/17300/12505	16	Yes
TM1_BP_GO:0001837	TM1	BP	GO:0001837	epithelial to mesenchymal transition	21/693	145/17051	4.15e-07	1.09e-05	7.65e-06	12842/20319/20377/13876/67888/17242/15251/21808/21809/21803/22160/17131/18121/52662/20682/21813/246154/22411/22418/17300/68010	21	Yes
TM1_BP_GO:0001838	TM1	BP	GO:0001838	embryonic epithelial tube formation	17/693	150/17051	0.00012897	0.0014824	0.00104124	20319/20377/14362/15251/21808/20971/24136/21803/22160/14573/18121/56334/20682/13800/22418/23908/68588	17	Yes
TM1_BP_GO:0001841	TM1	BP	GO:0001841	neural tube formation	14/693	130/17051	0.000827456	0.0066035	0.00463828	20319/20377/14362/15251/21808/20971/24136/21803/22160/18121/56334/13800/22418/68588	14	No
TM1_BP_GO:0001843	TM1	BP	GO:0001843	neural tube closure	13/693	110/17051	0.000519953	0.00453273	0.00318378	20319/20377/14362/21808/20971/24136/21803/22160/18121/56334/13800/22418/68588	13	No
TM1_BP_GO:0001893	TM1	BP	GO:0001893	maternal placenta development	6/693	29/17051	0.000940282	0.00733689	0.00515341	19223/11819/16157/13039/16477/56334	6	No
TM1_BP_GO:0001933	TM1	BP	GO:0001933	negative regulation of protein phosphorylation	31/693	342/17051	2.71e-05	0.000411956	0.000289357	20319/11819/67916/20377/235505/19249/20563/65112/21803/74155/22160/19122/17872/17131/16476/18121/14114/52662/56334/170643/100952/233328/18769/16362/16000/11600/19252/15234/13405/77446/18605	31	No
TM1_BP_GO:0001935	TM1	BP	GO:0001935	endothelial cell proliferation	19/693	148/17051	9e-06	0.000157207	0.000110422	20692/21825/20315/64103/18654/11819/73230/21828/17242/20356/13601/12828/16476/16000/13386/22418/15370/19378/13057	19	Yes
TM1_BP_GO:0001936	TM1	BP	GO:0001936	regulation of endothelial cell proliferation	18/693	133/17051	7.34e-06	0.000132378	9.3e-05	20692/21825/20315/64103/18654/11819/21828/17242/20356/13601/12828/16476/16000/13386/22418/15370/19378/13057	18	Yes
TM1_BP_GO:0001938	TM1	BP	GO:0001938	positive regulation of endothelial cell proliferation	11/693	90/17051	0.00103555	0.00787984	0.00553478	20315/18654/21828/17242/20356/13601/16476/16000/22418/15370/13057	11	Yes
TM1_BP_GO:0001942	TM1	BP	GO:0001942	hair follicle development	12/693	104/17051	0.00104342	0.00792737	0.00556817	16011/14313/21808/235505/18590/13039/14165/12394/20682/14683/22418/13167	12	No
TM1_BP_GO:0001952	TM1	BP	GO:0001952	regulation of cell-matrix adhesion	19/693	120/17051	3.6e-07	9.8e-06	6.88e-06	21825/11815/107581/17926/13640/18708/14758/50706/20971/20194/18787/18081/18186/12053/18552/11856/13405/244895/17387	19	Yes
TM1_BP_GO:0001953	TM1	BP	GO:0001953	negative regulation of cell-matrix adhesion	9/693	38/17051	1.62e-05	0.000260277	0.000182818	21825/11815/17926/18708/50706/18787/12053/11856/17387	9	No
TM1_BP_GO:0001958	TM1	BP	GO:0001958	endochondral ossification	9/693	31/17051	2.59e-06	5.39e-05	3.78e-05	12842/11647/15530/20289/14042/14172/14683/17300/17387	9	Yes
TM1_BP_GO:0001974	TM1	BP	GO:0001974	blood vessel remodeling	10/693	51/17051	3.25e-05	0.000482084	0.000338615	13876/21808/14042/14165/11601/11548/21817/16000/72780/17300	10	No
TM1_BP_GO:0002040	TM1	BP	GO:0002040	sprouting angiogenesis	17/693	121/17051	7.88e-06	0.000141217	9.92e-05	21825/68792/18654/73230/54409/20356/20563/80837/14645/26427/16952/18186/11600/72780/15370/16598/672511	17	Yes
TM1_BP_GO:0002053	TM1	BP	GO:0002053	positive regulation of mesenchymal cell proliferation	8/693	36/17051	7.87e-05	0.000976977	0.000686226	18933/20204/18590/14451/20682/21813/22418/114142	8	Yes
TM1_BP_GO:0002062	TM1	BP	GO:0002062	chondrocyte differentiation	23/693	101/17051	1.15e-11	1.26e-09	8.83e-10	20319/216616/17242/14219/15530/20289/12845/21803/218772/12167/16998/13601/12406/17132/14042/12394/14172/17131/73121/21834/18133/20682/21813	23	Yes
TM1_BP_GO:0002063	TM1	BP	GO:0002063	chondrocyte development	9/693	29/17051	1.38e-06	3.16e-05	2.22e-05	20319/12845/13601/12406/14172/17131/73121/20682/21813	9	Yes
TM1_BP_GO:0002237	TM1	BP	GO:0002237	response to molecule of bacterial origin	25/693	261/17051	6.59e-05	0.000854018	0.000599861	15945/11421/21803/18787/109815/20312/16410/19218/12608/20568/14825/22418/14469/18578/12628/22352/56615/16803/13617/18035/17319/22695/19219/22038/66102	25	No
TM1_BP_GO:0002548	TM1	BP	GO:0002548	monocyte chemotaxis	10/693	53/17051	4.61e-05	0.000641125	0.000450325	20315/11820/15945/20563/16854/18787/18133/16952/20312/19252	10	Yes
TM1_BP_GO:0002573	TM1	BP	GO:0002573	myeloid leukocyte differentiation	23/693	216/17051	2.47e-05	0.000382437	0.000268623	17311/18708/20377/19659/14734/235505/14281/11820/21803/16477/12394/16476/21847/233328/12608/21813/13386/14683/83924/12192/12306/14389/14118	23	Yes
TM1_BP_GO:0002683	TM1	BP	GO:0002683	negative regulation of immune system process	45/693	402/17051	7.4e-10	5.05e-08	3.55e-08	56213/21825/20315/11815/17311/56496/18708/242202/232345/20377/12258/17242/21808/20971/21809/20563/21803/11539/19122/16854/12394/109815/12509/16835/17131/18133/20682/16952/100952/20312/14190/12608/16362/16000/11600/19252/12053/83924/77125/14605/14118/65963/17319/19219/12505	45	Yes
TM1_BP_GO:0002685	TM1	BP	GO:0002685	regulation of leukocyte migration	35/693	213/17051	1.5e-12	2.23e-10	1.57e-10	21825/14456/20315/11815/13616/17311/18654/57266/21828/17242/11820/15945/20563/21803/11539/13601/67374/16854/21336/18787/71660/18133/16952/100952/20312/19218/19252/22418/12527/77125/16803/13617/17319/17387/19219	35	Yes
TM1_BP_GO:0002686	TM1	BP	GO:0002686	negative regulation of leukocyte migration	10/693	41/17051	4.12e-06	8.15e-05	5.72e-05	20315/11815/20563/11539/18133/100952/19252/77125/17319/19219	10	No
TM1_BP_GO:0002687	TM1	BP	GO:0002687	positive regulation of leukocyte migration	24/693	148/17051	6.55e-09	3e-07	2.11e-07	21825/14456/20315/13616/17311/18654/57266/21828/17242/11820/15945/21803/67374/16854/21336/18787/71660/20312/19218/22418/16803/13617/17387/19219	24	Yes
TM1_BP_GO:0002688	TM1	BP	GO:0002688	regulation of leukocyte chemotaxis	20/693	118/17051	5.56e-08	1.95e-06	1.37e-06	21825/14456/20315/13616/18654/57266/21828/17242/11820/15945/20563/18787/71660/18133/20312/19252/22418/16803/13617/17319	20	Yes
TM1_BP_GO:0002690	TM1	BP	GO:0002690	positive regulation of leukocyte chemotaxis	16/693	93/17051	9.59e-07	2.31e-05	1.62e-05	21825/14456/20315/13616/18654/57266/21828/17242/11820/15945/18787/71660/20312/22418/16803/13617	16	Yes
TM1_BP_GO:0002698	TM1	BP	GO:0002698	negative regulation of immune effector process	16/693	135/17051	0.000119207	0.00138863	0.000975372	56213/56496/232345/12258/21808/21809/21803/16854/12509/17131/16952/14190/16362/11600/12053/77125	16	No
TM1_BP_GO:0002701	TM1	BP	GO:0002701	negative regulation of production of molecular mediator of immune response	7/693	36/17051	0.000529488	0.00458329	0.00321929	21808/21809/21803/17131/11600/12053/77125	7	No
TM1_BP_GO:0002719	TM1	BP	GO:0002719	negative regulation of cytokine production involved in immune response	6/693	23/17051	0.000245981	0.00249953	0.00175566	21808/21809/21803/17131/11600/12053	6	No
TM1_BP_GO:0002761	TM1	BP	GO:0002761	regulation of myeloid leukocyte differentiation	15/693	123/17051	0.000139809	0.00158472	0.0011131	17311/18708/20377/19659/14281/21803/12394/16476/21847/12608/13386/14683/83924/12192/14118	15	Yes
TM1_BP_GO:0002763	TM1	BP	GO:0002763	positive regulation of myeloid leukocyte differentiation	9/693	63/17051	0.000952781	0.00741085	0.00520537	17311/14281/21803/12394/16476/21847/13386/14683/12192	9	No
TM1_BP_GO:0003002	TM1	BP	GO:0003002	regionalization	28/693	320/17051	0.000120656	0.00139995	0.000983322	68713/20319/11819/20377/13865/232174/14734/24136/14451/12167/68151/14042/14165/20346/14573/18121/56334/110350/18186/22411/22418/18552/18845/17300/11835/19378/18187/13082	28	No
TM1_BP_GO:0003007	TM1	BP	GO:0003007	heart morphogenesis	34/693	256/17051	1.18e-09	7.71e-08	5.42e-08	21825/16007/20564/20319/13876/67888/14362/215798/15251/21808/22762/20563/21803/218772/22160/14042/11504/17131/16476/18121/56334/20682/12831/18186/21813/22411/11600/22418/399558/17300/19378/18187/20148/77446	34	Yes
TM1_BP_GO:0003012	TM1	BP	GO:0003012	muscle system process	39/693	387/17051	1.76e-07	5.39e-06	3.79e-06	16011/17926/13616/11931/11534/242202/68813/14219/12845/54598/74155/24052/11539/21336/12291/238130/12288/20192/17131/14573/11548/11472/19218/16000/74116/109624/12293/60596/11739/16531/18578/11835/98660/13617/230857/13405/19219/19091/13057	39	Yes
TM1_BP_GO:0003013	TM1	BP	GO:0003013	circulatory system process	62/693	490/17051	1.36e-15	4.24e-13	2.98e-13	12843/14456/64817/13616/11819/11931/18708/20657/242202/17390/18162/68813/54409/50706/14219/15251/15200/21808/11820/12845/13052/11421/20563/21803/24052/11539/74617/14042/58861/21336/12291/238130/14043/12288/17131/20346/71660/11548/21834/20312/19218/11600/27494/14683/12293/60596/83397/15937/16531/18578/27360/17300/11835/98660/16598/13617/230857/13405/77446/17319/19091/13057	62	Yes
TM1_BP_GO:0003014	TM1	BP	GO:0003014	renal system process	14/693	107/17051	0.0001084	0.00127584	0.000896149	14456/18162/11826/11421/11539/21336/12288/19218/71602/14683/16531/13617/19219/13057	14	Yes
TM1_BP_GO:0003015	TM1	BP	GO:0003015	heart process	24/693	222/17051	1.28e-05	0.000214281	0.00015051	13616/11931/18708/242202/14219/15200/21808/13052/11421/24052/11539/14042/12291/14043/12288/17131/20346/11548/21834/12293/18578/98660/13405/19091	24	Yes
TM1_BP_GO:0003018	TM1	BP	GO:0003018	vascular process in circulatory system	35/693	210/17051	9.81e-13	1.63e-10	1.14e-10	13616/20657/242202/17390/68813/54409/15251/12845/11421/20563/21803/11539/74617/14042/58861/21336/12291/238130/14043/12288/11548/20312/19218/11600/27494/60596/83397/16531/27360/17300/98660/16598/13617/230857/19091	35	Yes
TM1_BP_GO:0003073	TM1	BP	GO:0003073	regulation of systemic arterial blood pressure	14/693	101/17051	5.72e-05	0.000760913	0.000534463	14456/13616/11819/50706/11421/11539/21336/71660/11548/15937/11835/230857/17319/13057	14	Yes
TM1_BP_GO:0003084	TM1	BP	GO:0003084	positive regulation of systemic arterial blood pressure	6/693	22/17051	0.000188239	0.00201719	0.00141687	11819/11421/11539/71660/11548/13057	6	Yes
TM1_BP_GO:0003094	TM1	BP	GO:0003094	glomerular filtration	6/693	23/17051	0.000245981	0.00249953	0.00175566	14456/11826/11539/71602/13617/13057	6	Yes
TM1_BP_GO:0003148	TM1	BP	GO:0003148	outflow tract septum morphogenesis	6/693	28/17051	0.00077197	0.00624189	0.00438429	21808/22762/218772/18186/21813/18187	6	No
TM1_BP_GO:0003149	TM1	BP	GO:0003149	membranous septum morphogenesis	4/693	10/17051	0.000466861	0.00415853	0.00292094	14362/21808/18121/21813	4	Yes
TM1_BP_GO:0003151	TM1	BP	GO:0003151	outflow tract morphogenesis	17/693	78/17051	1.14e-08	4.84e-07	3.4e-07	21825/20319/14362/15251/21808/22762/218772/22160/16476/18121/18186/21813/22411/22418/17300/18187/20148	17	Yes
TM1_BP_GO:0003170	TM1	BP	GO:0003170	heart valve development	12/693	57/17051	2.43e-06	5.1e-05	3.58e-05	16007/20564/13876/20289/21808/22762/20563/21803/22160/20682/100952/21813	12	Yes
TM1_BP_GO:0003171	TM1	BP	GO:0003171	atrioventricular valve development	6/693	27/17051	0.000627899	0.00526791	0.00370017	16007/20564/21808/22762/22160/21813	6	Yes
TM1_BP_GO:0003176	TM1	BP	GO:0003176	aortic valve development	6/693	24/17051	0.000316785	0.00306663	0.002154	20564/20563/21803/22160/20682/100952	6	No
TM1_BP_GO:0003179	TM1	BP	GO:0003179	heart valve morphogenesis	12/693	47/17051	2.61e-07	7.53e-06	5.29e-06	16007/20564/13876/20289/21808/22762/20563/21803/22160/20682/100952/21813	12	Yes
TM1_BP_GO:0003180	TM1	BP	GO:0003180	aortic valve morphogenesis	6/693	19/17051	7.6e-05	0.000961125	0.000675092	20564/20563/21803/22160/20682/100952	6	No
TM1_BP_GO:0003181	TM1	BP	GO:0003181	atrioventricular valve morphogenesis	6/693	24/17051	0.000316785	0.00306663	0.002154	16007/20564/21808/22762/22160/21813	6	Yes
TM1_BP_GO:0003188	TM1	BP	GO:0003188	heart valve formation	5/693	15/17051	0.000233623	0.00241394	0.00169555	13876/20289/22762/22160/20682	5	No
TM1_BP_GO:0003197	TM1	BP	GO:0003197	endocardial cushion development	8/693	47/17051	0.000551667	0.00475849	0.00334235	21825/13876/67888/21808/22160/18121/20682/21813	8	No
TM1_BP_GO:0003205	TM1	BP	GO:0003205	cardiac chamber development	24/693	180/17051	3.04e-07	8.63e-06	6.06e-06	16007/20564/20319/14362/215798/15251/21808/22762/20563/21803/218772/11504/17131/18121/18186/21813/22411/22418/18552/17300/18187/20148/77446/77579	24	Yes
TM1_BP_GO:0003206	TM1	BP	GO:0003206	cardiac chamber morphogenesis	22/693	134/17051	2.21e-08	8.55e-07	6e-07	16007/20564/20319/14362/215798/15251/21808/22762/20563/21803/218772/11504/17131/18121/18186/21813/22411/22418/17300/18187/20148/77446	22	Yes
TM1_BP_GO:0003208	TM1	BP	GO:0003208	cardiac ventricle morphogenesis	10/693	70/17051	0.000504214	0.00443492	0.00311508	20319/15251/21808/22762/21803/17131/18121/21813/17300/77446	10	No
TM1_BP_GO:0003231	TM1	BP	GO:0003231	cardiac ventricle development	16/693	132/17051	9.11e-05	0.00111518	0.000783303	16007/20564/20319/14362/15251/21808/22762/20563/21803/17131/18121/21813/22411/22418/17300/77446	16	No
TM1_BP_GO:0003279	TM1	BP	GO:0003279	cardiac septum development	18/693	119/17051	1.45e-06	3.3e-05	2.32e-05	16007/20564/14362/21808/22762/20563/218772/17131/18121/18186/21813/22411/22418/18552/18187/20148/77446/77579	18	Yes
TM1_BP_GO:0003281	TM1	BP	GO:0003281	ventricular septum development	12/693	78/17051	6.84e-05	0.000879433	0.000617712	16007/20564/14362/21808/22762/20563/17131/18121/21813/22411/22418/77446	12	No
TM1_BP_GO:0003401	TM1	BP	GO:0003401	axis elongation	8/693	33/17051	4.02e-05	0.000577381	0.000405551	20319/20377/21803/14165/20682/22411/22418/21923	8	No
TM1_BP_GO:0003416	TM1	BP	GO:0003416	endochondral bone growth	7/693	26/17051	5.94e-05	0.000781903	0.000549207	21825/12845/218772/13601/14042/20682/21813	7	Yes
TM1_BP_GO:0003417	TM1	BP	GO:0003417	growth plate cartilage development	5/693	19/17051	0.00079016	0.00633677	0.00445093	21825/12845/218772/20682/21813	5	No
TM1_BP_GO:0006022	TM1	BP	GO:0006022	aminoglycan metabolic process	18/693	99/17051	8.45e-08	2.84e-06	1.99e-06	13179/12111/12654/15211/56773/21803/83921/14042/14043/94214/15212/11600/23908/209378/17300/26877/19219/12505	18	Yes
TM1_BP_GO:0006816	TM1	BP	GO:0006816	calcium ion transport	33/693	407/17051	0.000134693	0.00153443	0.00107778	14456/20315/11931/54409/14219/21808/54598/15945/11421/21803/319984/19122/58861/16854/18787/12291/320508/12288/20192/213573/20312/16410/19218/16000/12293/170706/18578/98660/13167/13617/94249/13405/13057	33	No
TM1_BP_GO:0006929	TM1	BP	GO:0006929	substrate-dependent cell migration	7/693	30/17051	0.000159607	0.0017563	0.00123362	14268/18208/20563/14114/18186/27279/77579	7	No
TM1_BP_GO:0006936	TM1	BP	GO:0006936	muscle contraction	29/693	285/17051	5.53e-06	0.000104322	7.33e-05	13616/11931/242202/68813/14219/12845/54598/24052/11539/21336/12291/238130/12288/20192/17131/14573/11548/11472/19218/109624/12293/60596/16531/18578/98660/13617/13405/19219/19091	29	Yes
TM1_BP_GO:0006937	TM1	BP	GO:0006937	regulation of muscle contraction	20/693	148/17051	2.36e-06	5e-05	3.51e-05	11931/242202/68813/14219/54598/11539/21336/238130/12288/17131/11548/19218/109624/60596/16531/18578/98660/13405/19219/19091	20	No
TM1_BP_GO:0006939	TM1	BP	GO:0006939	smooth muscle contraction	18/693	109/17051	3.83e-07	1.01e-05	7.1e-06	13616/68813/12845/54598/11539/21336/12291/238130/12288/14573/19218/109624/60596/16531/98660/13617/19219/19091	18	No
TM1_BP_GO:0006940	TM1	BP	GO:0006940	regulation of smooth muscle contraction	12/693	65/17051	1.03e-05	0.000177105	0.000124398	68813/54598/11539/21336/238130/19218/109624/60596/16531/98660/19219/19091	12	No
TM1_BP_GO:0006942	TM1	BP	GO:0006942	regulation of striated muscle contraction	10/693	78/17051	0.00119586	0.00889154	0.0062454	11931/242202/14219/11539/12288/17131/11548/18578/98660/13405	10	No
TM1_BP_GO:0006979	TM1	BP	GO:0006979	response to oxidative stress	34/693	391/17051	2.66e-05	0.000405304	0.000284685	21825/23876/11815/13010/114886/53381/17392/20657/17390/11826/14362/15251/12955/14281/11820/12350/19122/21336/109815/11758/13078/16476/14778/11668/16952/16410/18477/15505/18595/54720/56615/625249/15234/19663	34	Yes
TM1_BP_GO:0006986	TM1	BP	GO:0006986	response to unfolded protein	13/693	116/17051	0.000864174	0.00679706	0.00477424	21825/18708/21828/12845/17872/109815/71853/26427/56334/15505/193740/11910/15481	13	Yes
TM1_BP_GO:0007015	TM1	BP	GO:0007015	actin filament organization	39/693	428/17051	2.25e-06	4.84e-05	3.4e-05	17926/18708/14107/14219/20971/21809/20194/20356/231637/18003/20563/12386/16419/67968/338367/21336/20742/102866/109711/208431/215114/73121/170643/20312/11472/22240/18186/104027/22411/71602/13800/109624/14457/22027/27360/11853/11856/77579/19219	39	Yes
TM1_BP_GO:0007044	TM1	BP	GO:0007044	cell-substrate junction assembly	15/693	92/17051	4.18e-06	8.21e-05	5.77e-05	14268/11815/107581/17926/13640/14758/20971/20194/109711/11472/16410/18186/11856/244895/17387	15	Yes
TM1_BP_GO:0007159	TM1	BP	GO:0007159	leukocyte cell-cell adhesion	26/693	335/17051	0.00126929	0.00933985	0.00656029	16008/21825/20315/11534/242202/17242/20971/21803/19122/67374/13848/14042/16854/12394/17131/16952/14190/12608/21813/16362/16000/15505/12053/54446/12628/12505	26	Yes
TM1_BP_GO:0007160	TM1	BP	GO:0007160	cell-matrix adhesion	29/693	211/17051	9.01e-09	3.95e-07	2.77e-07	14268/223272/21825/11815/107581/17926/13640/18708/14758/50706/14219/20971/20194/12587/16419/18787/18081/109711/100952/11472/16410/18186/12053/18552/81877/11856/13405/244895/17387	29	Yes
TM1_BP_GO:0007162	TM1	BP	GO:0007162	negative regulation of cell adhesion	38/693	286/17051	1.22e-10	9.94e-09	6.98e-09	21825/20315/11815/12842/17926/13640/18708/242202/17390/50706/17242/20971/20356/21803/19122/67374/16854/12394/18787/11601/17131/13078/14114/16952/19218/14190/12608/16362/11600/19252/12527/12053/18845/21923/11856/17387/19091/12505	38	Yes
TM1_BP_GO:0007164	TM1	BP	GO:0007164	establishment of tissue polarity	9/693	62/17051	0.00084662	0.00671278	0.00471504	20319/20377/14734/14362/14238/69217/22411/22418/68588	9	No
TM1_BP_GO:0007178	TM1	BP	GO:0007178	transmembrane receptor protein serine/threonine kinase signaling pathway	49/693	337/17051	6.8e-15	1.59e-12	1.12e-12	12843/56213/21825/16007/20319/14313/73230/20377/15211/67888/14734/14362/20289/21808/235505/14281/110075/12845/21809/68939/65112/21803/12167/16998/16419/14042/14165/20742/66695/17131/16476/14573/18121/52662/20482/18133/100952/50766/21813/13653/246154/108075/22418/22352/68010/15446/432442/14118/19663	49	Yes
TM1_BP_GO:0007179	TM1	BP	GO:0007179	transforming growth factor beta receptor signaling pathway	26/693	171/17051	6.27e-09	2.9e-07	2.04e-07	12843/56213/21825/21808/235505/14281/21809/68939/65112/21803/12167/16998/16419/66695/17131/16476/14573/52662/20482/100952/21813/246154/108075/68010/15446/14118	26	Yes
TM1_BP_GO:0007188	TM1	BP	GO:0007188	adenylate cyclase-modulating G protein-coupled receptor signaling pathway	18/693	192/17051	0.000859345	0.00676993	0.00475518	170458/18162/54409/215798/319387/11820/54598/15945/11539/14823/11548/19218/14683/83397/18578/105171/13617/19219	18	No
TM1_BP_GO:0007229	TM1	BP	GO:0007229	integrin-mediated signaling pathway	11/693	93/17051	0.00135987	0.00988775	0.00694514	14268/223272/67916/14219/100038882/16419/16410/18186/18552/21857/14389	11	Yes
TM1_BP_GO:0007369	TM1	BP	GO:0007369	gastrulation	19/693	165/17051	4.24e-05	0.000600091	0.000421502	14268/12816/20319/67916/20377/20289/68151/12832/14042/14043/18121/16410/12831/21813/22411/27494/19252/22418/17300	19	No
TM1_BP_GO:0007389	TM1	BP	GO:0007389	pattern specification process	33/693	407/17051	0.000134693	0.00153443	0.00107778	68713/20319/11819/14313/20377/13865/232174/14734/15251/24136/14451/12167/68151/67968/14042/14165/20346/14573/18121/56334/110350/18186/21813/22411/22418/18552/18845/17300/11835/19378/18187/13082/83675	33	No
TM1_BP_GO:0007409	TM1	BP	GO:0007409	axonogenesis	45/693	448/17051	2.17e-08	8.46e-07	5.94e-07	14268/13723/20315/20564/11658/23964/13640/12215/12558/17756/18040/21808/11820/18039/20356/18208/24136/20563/12386/14451/12167/11735/13848/14042/11787/20346/14573/18121/20482/12552/80883/18186/27279/13800/22418/12934/16779/399558/18845/13175/16773/14009/22352/18187/77579	45	Yes
TM1_BP_GO:0007411	TM1	BP	GO:0007411	axon guidance	32/693	228/17051	9e-10	6.05e-08	4.25e-08	13723/20315/20564/11658/23964/13640/12215/21808/11820/20356/18208/20563/14451/12167/11735/13848/14042/11787/20346/14573/18121/18186/13800/22418/12934/16779/399558/18845/16773/14009/18187/77579	32	Yes
TM1_BP_GO:0007416	TM1	BP	GO:0007416	synapse assembly	19/693	187/17051	0.00022693	0.0023547	0.00165393	68792/64085/13640/21826/18708/12558/14735/14362/319387/11820/21983/18208/330222/192167/22418/399558/246316/331461/320840	19	No
TM1_BP_GO:0007431	TM1	BP	GO:0007431	salivary gland development	7/693	38/17051	0.000746042	0.00607819	0.00426931	18590/57764/14165/20346/21817/18186/15234	7	Yes
TM1_BP_GO:0007435	TM1	BP	GO:0007435	salivary gland morphogenesis	7/693	35/17051	0.000441839	0.00400101	0.0028103	18590/57764/14165/20346/21817/18186/15234	7	Yes
TM1_BP_GO:0007492	TM1	BP	GO:0007492	endoderm development	12/693	67/17051	1.42e-05	0.000231787	0.000162807	14268/12816/21803/12832/14042/11601/18121/16410/12831/11600/19252/12192	12	No
TM1_BP_GO:0007517	TM1	BP	GO:0007517	muscle organ development	31/693	315/17051	5.27e-06	0.000100324	7.05e-05	11906/11819/56312/14733/232174/14362/20289/12955/21808/14281/22762/21803/22160/17131/18121/20482/13653/11600/22418/217082/12224/15370/114142/14605/54720/17300/14009/11910/12804/13405/77446	31	Yes
TM1_BP_GO:0007519	TM1	BP	GO:0007519	skeletal muscle tissue development	18/693	171/17051	0.000212121	0.00221981	0.00155919	11819/56312/14733/232174/20289/14281/21803/22160/20482/13653/217082/12224/15370/114142/14605/54720/11910/13405	18	Yes
TM1_BP_GO:0007548	TM1	BP	GO:0007548	sex differentiation	30/693	255/17051	1.77e-07	5.39e-06	3.79e-06	17311/20319/56312/13134/53381/14313/20377/17390/15081/21808/22762/30953/12167/14165/12394/18787/22187/11504/14238/20346/20682/16410/12608/11600/22418/18595/17300/11835/12804/19219	30	Yes
TM1_BP_GO:0007565	TM1	BP	GO:0007565	female pregnancy	16/693	119/17051	2.54e-05	0.000388346	0.000272773	16011/19223/11819/16157/232345/17390/15081/13039/67968/16477/11857/56334/18552/21857/11835/15446	16	Yes
TM1_BP_GO:0007588	TM1	BP	GO:0007588	excretion	11/693	55/17051	1.08e-05	0.000183188	0.000128671	18993/17242/11421/11539/21336/12288/170643/19218/14683/16531/19219	11	No
TM1_BP_GO:0007589	TM1	BP	GO:0007589	body fluid secretion	11/693	88/17051	0.000857085	0.00676298	0.0047503	18162/11826/15251/11539/12583/21336/14165/12306/16531/19219/13057	11	No
TM1_BP_GO:0007596	TM1	BP	GO:0007596	blood coagulation	19/693	159/17051	2.53e-05	0.000388346	0.000272773	14268/21825/14456/12258/12845/18590/27973/18787/14114/20312/19218/14683/12527/12306/19124/18595/12496/12628/19091	19	Yes
TM1_BP_GO:0007599	TM1	BP	GO:0007599	hemostasis	19/693	161/17051	3.01e-05	0.000451868	0.000317391	14268/21825/14456/12258/12845/18590/27973/18787/14114/20312/19218/14683/12527/12306/19124/18595/12496/12628/19091	19	Yes
TM1_BP_GO:0007611	TM1	BP	GO:0007611	learning or memory	25/693	289/17051	0.000326076	0.00314417	0.00220846	20317/242202/17242/15251/11820/21983/108012/319984/19122/17159/21336/12288/16835/16476/18121/11548/14667/19063/104027/13653/16000/114142/54720/98660/13167	25	No
TM1_BP_GO:0007622	TM1	BP	GO:0007622	rhythmic behavior	9/693	58/17051	0.000513366	0.00448327	0.00314904	11906/11539/27419/19218/13653/192167/16531/19215/19219	9	No
TM1_BP_GO:0007626	TM1	BP	GO:0007626	locomotory behavior	22/693	240/17051	0.000330332	0.00316037	0.00221983	18619/20315/11906/27386/15211/319387/11820/14658/20363/12288/27419/15212/11804/11548/19063/13653/16531/54720/98660/105171/13014/320840	22	No
TM1_BP_GO:0008015	TM1	BP	GO:0008015	blood circulation	60/693	462/17051	1.2e-15	4.22e-13	2.97e-13	12843/14456/13616/11819/11931/18708/20657/242202/17390/18162/68813/54409/50706/14219/15251/15200/21808/11820/12845/13052/11421/20563/21803/24052/11539/74617/14042/58861/21336/12291/238130/14043/12288/17131/20346/71660/11548/21834/20312/19218/11600/27494/14683/12293/60596/83397/15937/16531/18578/27360/17300/11835/98660/16598/13617/230857/13405/17319/19091/13057	60	Yes
TM1_BP_GO:0008016	TM1	BP	GO:0008016	regulation of heart contraction	20/693	174/17051	2.76e-05	0.0004168	0.00029276	13616/11931/18708/242202/14219/15200/21808/13052/11539/12291/12288/17131/20346/11548/21834/12293/18578/98660/13405/19091	20	Yes
TM1_BP_GO:0008038	TM1	BP	GO:0008038	neuron recognition	8/693	51/17051	0.000968553	0.00750973	0.00527481	13723/12215/11820/20356/14042/20346/18186/22418	8	No
TM1_BP_GO:0008045	TM1	BP	GO:0008045	motor neuron axon guidance	7/693	33/17051	0.000301227	0.0029747	0.00208942	20315/11658/18208/20563/20346/18121/18186	7	No
TM1_BP_GO:0008217	TM1	BP	GO:0008217	regulation of blood pressure	25/693	182/17051	9.62e-08	3.19e-06	2.24e-06	12843/14456/13616/11819/18708/18162/54409/50706/11421/11539/74617/14042/21336/14043/12288/71660/11548/14683/60596/15937/11835/98660/230857/17319/13057	25	Yes
TM1_BP_GO:0008406	TM1	BP	GO:0008406	gonad development	26/693	206/17051	2.96e-07	8.49e-06	5.96e-06	17311/20319/56312/53381/14313/20377/17390/15081/21808/22762/30953/12167/12394/18787/22187/11504/20346/20682/16410/12608/11600/22418/18595/17300/11835/19219	26	Yes
TM1_BP_GO:0008543	TM1	BP	GO:0008543	fibroblast growth factor receptor signaling pathway	10/693	72/17051	0.000633696	0.00530748	0.00372796	21825/14733/14219/14042/14165/14172/26427/18121/22418/399558	10	Yes
TM1_BP_GO:0008584	TM1	BP	GO:0008584	male gonad development	13/693	117/17051	0.000936913	0.00733689	0.00515341	20319/56312/53381/20377/15081/21808/22762/22187/20346/20682/22418/18595/11835	13	Yes
TM1_BP_GO:0008585	TM1	BP	GO:0008585	female gonad development	17/693	106/17051	1.23e-06	2.85e-05	2e-05	17311/56312/14313/20377/17390/22762/30953/12167/12394/18787/22187/11504/12608/11600/18595/17300/19219	17	Yes
TM1_BP_GO:0008625	TM1	BP	GO:0008625	extrinsic apoptotic signaling pathway via death domain receptors	10/693	74/17051	0.000789474	0.00633677	0.00445093	21825/20319/18708/20377/12167/16854/18787/20482/11910/15234	10	Yes
TM1_BP_GO:0009100	TM1	BP	GO:0009100	glycoprotein metabolic process	26/693	325/17051	0.000818386	0.00654176	0.00459492	13179/12111/13010/14733/50786/13200/16431/15251/15200/56374/16432/232313/13039/20014/14042/14043/94214/56175/64294/16000/23908/77125/21664/278279/26877/14584	26	No
TM1_BP_GO:0009611	TM1	BP	GO:0009611	response to wounding	59/693	460/17051	3.73e-15	1.02e-12	7.15e-13	78896/14268/21825/14456/12842/16007/17183/67916/17390/11826/12258/17242/15251/15200/21808/235505/12845/20971/18039/13052/18590/27973/21803/226101/14042/14165/18787/16476/14573/18121/14114/12798/14230/16952/20312/12831/19218/22240/27279/16000/14683/22418/12527/16779/12192/12306/19124/18595/21923/12496/12628/21857/67866/17319/77579/22695/19219/19091/12505	59	Yes
TM1_BP_GO:0009612	TM1	BP	GO:0009612	response to mechanical stimulus	23/693	145/17051	2.08e-08	8.33e-07	5.85e-07	21825/20315/12842/17390/11826/17242/20289/14281/14823/21336/667742/16476/12798/20682/22411/16000/114142/14009/98660/13617/18035/13405/19219	23	Yes
TM1_BP_GO:0010035	TM1	BP	GO:0010035	response to inorganic substance	36/693	441/17051	5.89e-05	0.00077926	0.00054735	14268/21825/23876/20657/17390/11826/12955/14281/11820/18039/12870/11735/19122/16477/16478/21336/12291/14590/14282/69048/13078/114679/16476/16952/16410/192167/18477/15505/17748/16531/15370/66871/29876/15234/22038/18484	36	Yes
TM1_BP_GO:0010038	TM1	BP	GO:0010038	response to metal ion	23/693	268/17051	0.000621414	0.0052494	0.00368717	14268/21825/20657/11826/14281/11820/12870/11735/19122/16477/16478/12291/14590/14282/69048/16476/192167/17748/16531/66871/29876/22038/18484	23	Yes
TM1_BP_GO:0010171	TM1	BP	GO:0010171	body morphogenesis	12/693	61/17051	5.16e-06	9.86e-05	6.92e-05	12842/17390/14734/20289/21808/21809/30953/21803/18121/14683/18595/78892	12	Yes
TM1_BP_GO:0010463	TM1	BP	GO:0010463	mesenchymal cell proliferation	10/693	54/17051	5.46e-05	0.000737581	0.000518075	18933/14734/20204/18590/14451/20682/21813/22411/22418/114142	10	Yes
TM1_BP_GO:0010464	TM1	BP	GO:0010464	regulation of mesenchymal cell proliferation	9/693	44/17051	5.67e-05	0.000756722	0.00053152	18933/20204/18590/14451/20682/21813/22411/22418/114142	9	Yes
TM1_BP_GO:0010466	TM1	BP	GO:0010466	negative regulation of peptidase activity	28/693	190/17051	3.37e-09	1.66e-07	1.17e-07	20317/21825/14456/13010/20319/21858/232345/11826/12258/14734/12955/235505/13479/11820/13601/12406/18787/68581/20568/16000/74116/15370/21857/209378/13014/67866/15234/12505	28	Yes
TM1_BP_GO:0010544	TM1	BP	GO:0010544	negative regulation of platelet activation	5/693	19/17051	0.00079016	0.00633677	0.00445093	18590/19218/12527/18595/19091	5	No
TM1_BP_GO:0010559	TM1	BP	GO:0010559	regulation of glycoprotein biosynthetic process	8/693	46/17051	0.000474414	0.00419536	0.00294681	16431/15200/56374/16432/56175/64294/16000/77125	8	No
TM1_BP_GO:0010561	TM1	BP	GO:0010561	negative regulation of glycoprotein biosynthetic process	6/693	15/17051	1.61e-05	0.000259323	0.000182148	16431/15200/56374/16432/56175/64294	6	Yes
TM1_BP_GO:0010563	TM1	BP	GO:0010563	negative regulation of phosphorus metabolic process	38/693	487/17051	9.64e-05	0.00116548	0.000818633	20319/11819/56312/67916/20377/72269/21808/235505/19249/18590/20563/65112/21803/74155/22160/19122/338367/17872/17131/16476/18121/14114/52662/56334/170643/100952/233328/18769/16362/16000/11600/19252/15937/15234/13405/77446/19091/18605	38	No
TM1_BP_GO:0010594	TM1	BP	GO:0010594	regulation of endothelial cell migration	23/693	160/17051	1.35e-07	4.22e-06	2.96e-06	13179/20317/20692/21825/68792/11819/12215/67916/73230/15251/20356/20563/21803/80837/11601/14645/14172/16952/18186/16000/11600/27494/22418	23	Yes
TM1_BP_GO:0010595	TM1	BP	GO:0010595	positive regulation of endothelial cell migration	16/693	104/17051	4.41e-06	8.52e-05	5.98e-05	20692/21825/68792/12215/67916/15251/20356/21803/80837/14172/16952/18186/16000/11600/27494/22418	16	Yes
TM1_BP_GO:0010631	TM1	BP	GO:0010631	epithelial cell migration	42/693	290/17051	7e-13	1.27e-10	8.94e-11	13179/20317/20692/21825/68792/13036/11819/12215/67916/73230/68813/11826/15251/15200/21808/20356/24136/20563/21803/21336/80837/14165/18787/11601/14645/14172/13078/16476/20346/18133/20682/16952/16410/11881/18186/21813/16000/11600/27494/22418/15370/14389	42	Yes
TM1_BP_GO:0010632	TM1	BP	GO:0010632	regulation of epithelial cell migration	37/693	226/17051	3.84e-13	7.54e-11	5.29e-11	13179/20317/20692/21825/68792/13036/11819/12215/67916/73230/68813/11826/15251/15200/21808/20356/20563/21803/21336/80837/14165/18787/11601/14645/14172/16476/20346/20682/16952/11881/18186/21813/16000/11600/27494/22418/14389	37	Yes
TM1_BP_GO:0010634	TM1	BP	GO:0010634	positive regulation of epithelial cell migration	28/693	150/17051	1.15e-11	1.26e-09	8.83e-10	20692/21825/68792/13036/12215/67916/68813/11826/15251/15200/21808/20356/21803/21336/80837/14165/18787/14172/16476/20682/16952/18186/21813/16000/11600/27494/22418/14389	28	Yes
TM1_BP_GO:0010712	TM1	BP	GO:0010712	regulation of collagen metabolic process	12/693	53/17051	1.06e-06	2.49e-05	1.75e-05	14268/114886/14219/20289/21809/76293/21803/74155/18787/26427/100952/22352	12	Yes
TM1_BP_GO:0010714	TM1	BP	GO:0010714	positive regulation of collagen metabolic process	7/693	33/17051	0.000301227	0.0029747	0.00208942	14219/20289/21809/21803/18787/26427/22352	7	Yes
TM1_BP_GO:0010717	TM1	BP	GO:0010717	regulation of epithelial to mesenchymal transition	15/693	94/17051	5.51e-06	0.000104322	7.33e-05	12842/20319/20377/17242/21808/21809/21803/22160/17131/18121/52662/21813/246154/17300/68010	15	Yes
TM1_BP_GO:0010718	TM1	BP	GO:0010718	positive regulation of epithelial to mesenchymal transition	9/693	47/17051	9.78e-05	0.00117369	0.000824394	12842/17242/21808/21809/21803/22160/21813/17300/68010	9	Yes
TM1_BP_GO:0010720	TM1	BP	GO:0010720	positive regulation of cell development	29/693	342/17051	0.000158472	0.0017563	0.00123362	14268/20317/20315/17926/13640/242202/68813/17242/15251/18039/20194/20356/11421/18003/18208/24136/21803/12394/17131/18121/20482/20312/18186/27279/16000/77125/18845/331461/22352	29	Yes
TM1_BP_GO:0010810	TM1	BP	GO:0010810	regulation of cell-substrate adhesion	35/693	216/17051	2.28e-12	3.2e-10	2.25e-10	14268/21825/11815/12842/107581/16007/17926/13640/12837/18708/14758/68813/50706/17242/54156/20971/407800/20194/67896/18003/18787/11601/18081/94214/14114/100952/18186/13612/12053/18552/320712/11856/13405/244895/17387	35	Yes
TM1_BP_GO:0010811	TM1	BP	GO:0010811	positive regulation of cell-substrate adhesion	23/693	131/17051	2.79e-09	1.45e-07	1.02e-07	14268/21825/107581/16007/17926/12837/68813/17242/54156/20971/407800/20194/67896/18003/18081/94214/14114/100952/18186/13612/18552/320712/13405	23	Yes
TM1_BP_GO:0010812	TM1	BP	GO:0010812	negative regulation of cell-substrate adhesion	13/693	61/17051	7.99e-07	1.95e-05	1.37e-05	21825/11815/12842/17926/13640/18708/50706/18787/11601/14114/12053/11856/17387	13	Yes
TM1_BP_GO:0010817	TM1	BP	GO:0010817	regulation of hormone levels	40/693	492/17051	2.54e-05	0.000388346	0.000272773	78896/13616/13640/20377/13038/19659/232174/11826/15251/53322/11421/54381/94353/30953/11539/12167/13039/54003/21336/12394/14645/12288/13078/114679/18133/11668/16952/19218/13653/16000/108075/14683/18552/18595/16531/19378/230857/20148/13082/19219	40	Yes
TM1_BP_GO:0010934	TM1	BP	GO:0010934	macrophage cytokine production	5/693	18/17051	0.000602218	0.00510481	0.00358561	14456/21808/21809/21803/22418	5	Yes
TM1_BP_GO:0010951	TM1	BP	GO:0010951	negative regulation of endopeptidase activity	17/693	142/17051	6.5e-05	0.000843668	0.00059259	20317/21825/14456/20319/21858/11826/12258/12955/13479/12406/18787/68581/16000/15370/21857/15234/12505	17	Yes
TM1_BP_GO:0010959	TM1	BP	GO:0010959	regulation of metal ion transport	23/693	281/17051	0.00118158	0.00880002	0.00618112	20315/11931/21808/15945/11421/21803/319984/19122/16854/18787/12291/12288/213573/20312/19218/16000/12293/18578/98660/13167/13617/13405/13057	23	No
TM1_BP_GO:0014020	TM1	BP	GO:0014020	primary neural tube formation	14/693	117/17051	0.000282266	0.00280438	0.00196979	20319/20377/14362/15251/21808/20971/24136/21803/22160/18121/56334/13800/22418/68588	14	No
TM1_BP_GO:0014031	TM1	BP	GO:0014031	mesenchymal cell development	17/693	86/17051	5.35e-08	1.89e-06	1.33e-06	14268/13616/17311/12558/15251/20356/24136/22160/20346/14573/20682/18186/17300/19378/13617/18187/13082	17	Yes
TM1_BP_GO:0014032	TM1	BP	GO:0014032	neural crest cell development	17/693	81/17051	2.09e-08	8.33e-07	5.85e-07	14268/13616/17311/12558/15251/20356/24136/22160/20346/14573/20682/18186/17300/19378/13617/18187/13082	17	Yes
TM1_BP_GO:0014033	TM1	BP	GO:0014033	neural crest cell differentiation	19/693	89/17051	2.28e-09	1.24e-07	8.74e-08	14268/13616/17311/12558/20377/15251/20356/24136/22160/14042/20346/14573/20682/18186/17300/19378/13617/18187/13082	19	Yes
TM1_BP_GO:0014065	TM1	BP	GO:0014065	phosphatidylinositol 3-kinase signaling	15/693	132/17051	0.000306706	0.00301183	0.0021155	14268/13179/17926/18708/21808/19249/18590/22160/54635/20682/16000/11600/12192/26563/15234	15	No
TM1_BP_GO:0014066	TM1	BP	GO:0014066	regulation of phosphatidylinositol 3-kinase signaling	13/693	100/17051	0.000202034	0.00212495	0.00149256	14268/13179/17926/21808/19249/18590/22160/54635/20682/16000/11600/26563/15234	13	No
TM1_BP_GO:0014068	TM1	BP	GO:0014068	positive regulation of phosphatidylinositol 3-kinase signaling	11/693	76/17051	0.000238108	0.00245511	0.00172447	14268/13179/17926/21808/18590/54635/20682/16000/11600/26563/15234	11	No
TM1_BP_GO:0014706	TM1	BP	GO:0014706	striated muscle tissue development	41/693	409/17051	9.83e-08	3.24e-06	2.27e-06	11819/56312/14733/232174/15530/20289/21808/14281/13052/22762/21803/218772/24052/22160/16526/17131/18121/11548/20482/11472/21813/13653/16000/11600/74116/22418/11739/18595/217082/12224/15370/114142/14605/54720/17300/19378/11910/13405/77446/77579/19091	41	Yes
TM1_BP_GO:0014812	TM1	BP	GO:0014812	muscle cell migration	22/693	110/17051	4.7e-10	3.35e-08	2.35e-08	16011/68813/21828/50706/17242/18590/231637/11421/20563/21336/18787/238130/11504/13078/18133/16952/13653/16000/18552/17319/19219/19091	22	Yes
TM1_BP_GO:0014829	TM1	BP	GO:0014829	vascular associated smooth muscle contraction	6/693	29/17051	0.000940282	0.00733689	0.00515341	13616/68813/12845/12291/238130/13617	6	No
TM1_BP_GO:0014832	TM1	BP	GO:0014832	urinary bladder smooth muscle contraction	4/693	11/17051	0.000710111	0.00582814	0.00409367	21336/12288/19218/16531	4	No
TM1_BP_GO:0014896	TM1	BP	GO:0014896	muscle hypertrophy	13/693	102/17051	0.000246734	0.002502	0.0017574	16011/17926/11534/242202/74155/11548/16000/74116/11739/11835/230857/19091/13057	13	No
TM1_BP_GO:0014897	TM1	BP	GO:0014897	striated muscle hypertrophy	12/693	101/17051	0.000803495	0.0064332	0.00451866	16011/17926/11534/242202/74155/11548/16000/74116/11739/11835/230857/19091	12	No
TM1_BP_GO:0014909	TM1	BP	GO:0014909	smooth muscle cell migration	20/693	97/17051	1.65e-09	9.95e-08	6.99e-08	16011/68813/50706/17242/18590/231637/11421/20563/21336/18787/238130/11504/13078/18133/13653/16000/18552/17319/19219/19091	20	Yes
TM1_BP_GO:0014910	TM1	BP	GO:0014910	regulation of smooth muscle cell migration	19/693	89/17051	2.28e-09	1.24e-07	8.74e-08	16011/68813/50706/17242/18590/231637/11421/20563/21336/18787/238130/11504/13078/13653/16000/18552/17319/19219/19091	19	Yes
TM1_BP_GO:0014911	TM1	BP	GO:0014911	positive regulation of smooth muscle cell migration	13/693	61/17051	7.99e-07	1.95e-05	1.37e-05	16011/68813/50706/17242/231637/238130/11504/13078/13653/16000/18552/17319/19219	13	Yes
TM1_BP_GO:0016049	TM1	BP	GO:0016049	cell growth	54/693	492/17051	2.96e-11	2.62e-09	1.84e-09	14268/16011/20315/20564/20319/13640/22403/20377/16010/50706/17756/232441/15200/12955/72269/21808/11820/21809/20356/18208/24136/20563/14451/21803/11787/13730/17131/20346/11548/18133/20682/19063/76863/18186/21813/27279/22411/16000/74116/22418/12053/12934/16779/11739/13175/14199/67866/18187/17387/19091/12505/18605/13057/66102	54	Yes
TM1_BP_GO:0016055	TM1	BP	GO:0016055	Wnt signaling pathway	40/693	405/17051	2.1e-07	6.23e-06	4.38e-06	12842/17926/20319/67916/12558/20377/14735/242939/14734/24117/14362/17242/11820/56332/72293/20356/24136/21803/68151/14042/14165/207181/18121/20682/69217/233328/56811/18647/80707/13653/22411/22418/72780/68588/672511/21885/68010/26563/83675/12505	40	Yes
TM1_BP_GO:0016331	TM1	BP	GO:0016331	morphogenesis of embryonic epithelium	21/693	177/17051	1.07e-05	0.000183188	0.000128671	20319/20377/14362/15251/21808/20971/24136/21803/22160/14165/14573/18121/11668/56334/20682/13800/22418/23908/68588/11835/19378	21	Yes
TM1_BP_GO:0016525	TM1	BP	GO:0016525	negative regulation of angiogenesis	20/693	106/17051	8.38e-09	3.72e-07	2.61e-07	13179/20317/20692/21825/23876/21826/64103/21808/15945/18787/11601/12828/11504/12509/26427/12827/100952/27494/17300/16598	20	Yes
TM1_BP_GO:0017015	TM1	BP	GO:0017015	regulation of transforming growth factor beta receptor signaling pathway	15/693	112/17051	4.73e-05	0.000651672	0.000457733	56213/21825/235505/21809/68939/65112/21803/66695/17131/52662/20482/100952/246154/68010/14118	15	No
TM1_BP_GO:0018108	TM1	BP	GO:0018108	peptidyl-tyrosine phosphorylation	33/693	310/17051	4.55e-07	1.18e-05	8.26e-06	14456/17311/20319/13640/67916/20377/21828/216616/15200/11820/18590/11421/18003/21803/74155/11539/54635/19122/14165/14573/11804/12931/233328/18186/16362/16000/11600/15505/18595/15234/17319/19219/12505	33	Yes
TM1_BP_GO:0018126	TM1	BP	GO:0018126	protein hydroxylation	7/693	26/17051	5.94e-05	0.000781903	0.000549207	53381/14789/56693/210530/14230/18451/66180	7	Yes
TM1_BP_GO:0018149	TM1	BP	GO:0018149	peptide cross-linking	7/693	25/17051	4.5e-05	0.00062987	0.000442419	14268/13179/21825/12111/94214/21817/16952	7	Yes
TM1_BP_GO:0018208	TM1	BP	GO:0018208	peptidyl-proline modification	7/693	36/17051	0.000529488	0.00458329	0.00321929	53381/19035/56693/19038/210530/14230/18451	7	No
TM1_BP_GO:0018212	TM1	BP	GO:0018212	peptidyl-tyrosine modification	33/693	313/17051	5.67e-07	1.43e-05	1e-05	14456/17311/20319/13640/67916/20377/21828/216616/15200/11820/18590/11421/18003/21803/74155/11539/54635/19122/14165/14573/11804/12931/233328/18186/16362/16000/11600/15505/18595/15234/17319/19219/12505	33	Yes
TM1_BP_GO:0019229	TM1	BP	GO:0019229	regulation of vasoconstriction	14/693	77/17051	2.3e-06	4.89e-05	3.44e-05	13616/242202/17390/68813/15251/58861/21336/238130/12288/11548/20312/19218/27360/98660	14	No
TM1_BP_GO:0019511	TM1	BP	GO:0019511	peptidyl-proline hydroxylation	4/693	12/17051	0.00103106	0.00785781	0.00551931	53381/56693/210530/18451	4	No
TM1_BP_GO:0019932	TM1	BP	GO:0019932	second-messenger-mediated signaling	25/693	297/17051	0.000490164	0.00432685	0.00303917	21825/13616/23964/11931/242202/11826/67888/215798/53322/11820/24052/19122/19416/20682/19218/16000/14683/54446/60596/17748/54720/230857/13405/19219/19091	25	No
TM1_BP_GO:0021536	TM1	BP	GO:0021536	diencephalon development	9/693	62/17051	0.00084662	0.00671278	0.00471504	20356/24136/14165/22187/20346/18121/18186/22418/18187	9	Yes
TM1_BP_GO:0021604	TM1	BP	GO:0021604	cranial nerve structural organization	4/693	10/17051	0.000466861	0.00415853	0.00292094	20346/18186/18187/13405	4	No
TM1_BP_GO:0021915	TM1	BP	GO:0021915	neural tube development	18/693	185/17051	0.000554875	0.00477777	0.00335589	20319/20377/14362/15251/21808/20971/24136/14451/21803/22160/18121/56334/13800/22418/18845/12192/68588/19378	18	No
TM1_BP_GO:0022404	TM1	BP	GO:0022404	molting cycle process	12/693	107/17051	0.00134006	0.00975817	0.00685412	16011/14313/21808/235505/18590/13039/14165/12394/20682/14683/22418/13167	12	No
TM1_BP_GO:0022405	TM1	BP	GO:0022405	hair cycle process	12/693	107/17051	0.00134006	0.00975817	0.00685412	16011/14313/21808/235505/18590/13039/14165/12394/20682/14683/22418/13167	12	No
TM1_BP_GO:0022407	TM1	BP	GO:0022407	regulation of cell-cell adhesion	33/693	416/17051	0.000202191	0.00212495	0.00149256	16008/20315/13640/67916/18708/11534/242202/17242/20971/21803/11735/19122/13848/16854/14924/12394/17131/16952/20312/19218/14190/17909/12608/21813/16362/16000/15505/22418/12527/12053/54446/19091/12505	33	Yes
TM1_BP_GO:0022408	TM1	BP	GO:0022408	negative regulation of cell-cell adhesion	19/693	187/17051	0.00022693	0.0023547	0.00165393	20315/18708/242202/17242/20971/21803/19122/16854/12394/17131/16952/19218/14190/12608/16362/12527/12053/19091/12505	19	No
TM1_BP_GO:0022604	TM1	BP	GO:0022604	regulation of cell morphogenesis	26/693	322/17051	0.000713808	0.0058487	0.00410811	14268/20692/17926/13640/68813/50706/17242/20194/18003/80837/15212/14114/16952/80883/17909/18186/27059/22418/14457/18845/331461/11853/68010/13822/77579/12505	26	Yes
TM1_BP_GO:0022612	TM1	BP	GO:0022612	gland morphogenesis	24/693	147/17051	5.7e-09	2.66e-07	1.87e-07	16011/20377/17390/17242/18590/18208/20563/21803/57764/14165/14172/20346/18121/21817/20682/12608/18186/21813/16000/22418/21923/11835/15234/12505	24	Yes
TM1_BP_GO:0030001	TM1	BP	GO:0030001	metal ion transport	36/693	484/17051	0.000367858	0.00342589	0.00240634	14456/20315/11931/54409/14219/21808/54598/15945/11421/21803/319984/19122/58861/16854/18787/12291/320508/12288/20192/213573/69048/20312/16410/19218/54403/16000/12293/240776/170706/18578/98660/13167/13617/94249/13405/13057	36	Yes
TM1_BP_GO:0030038	TM1	BP	GO:0030038	contractile actin filament bundle assembly	14/693	111/17051	0.000161388	0.0017563	0.00123362	17926/18708/14219/20971/21809/20194/16419/21336/18186/104027/22411/11853/11856/19219	14	No
TM1_BP_GO:0030099	TM1	BP	GO:0030099	myeloid cell differentiation	33/693	388/17051	5.39e-05	0.000734944	0.000516223	17311/18708/20377/19659/14734/15251/235505/14281/11820/100038882/21803/16477/12394/109711/16476/21847/12183/233328/12608/21813/13386/14683/12053/83924/17150/12192/12306/14389/16598/14118/18035/22695/22038	33	Yes
TM1_BP_GO:0030111	TM1	BP	GO:0030111	regulation of Wnt signaling pathway	33/693	298/17051	1.82e-07	5.52e-06	3.88e-06	12842/20319/67916/12558/20377/14734/24117/14362/17242/11820/72293/20356/24136/21803/68151/14165/207181/18121/20682/69217/233328/56811/18647/80707/13653/22411/22418/72780/68588/672511/21885/68010/83675	33	Yes
TM1_BP_GO:0030168	TM1	BP	GO:0030168	platelet activation	11/693	80/17051	0.000376124	0.00349624	0.00245575	14268/12845/18590/20312/19218/14683/12527/18595/12496/12628/19091	11	No
TM1_BP_GO:0030177	TM1	BP	GO:0030177	positive regulation of Wnt signaling pathway	15/693	134/17051	0.000361238	0.00340279	0.00239011	12842/20319/20377/14734/20356/24136/21803/68151/14165/69217/233328/56811/22418/72780/68010	15	Yes
TM1_BP_GO:0030178	TM1	BP	GO:0030178	negative regulation of Wnt signaling pathway	21/693	157/17051	1.57e-06	3.51e-05	2.47e-05	20319/12558/20377/14734/24117/14362/17242/11820/72293/207181/18121/20682/56811/80707/13653/22411/22418/68588/672511/21885/83675	21	Yes
TM1_BP_GO:0030193	TM1	BP	GO:0030193	regulation of blood coagulation	10/693	61/17051	0.000159135	0.0017563	0.00123362	21825/12258/18590/27973/18787/19218/12527/12306/18595/19091	10	No
TM1_BP_GO:0030195	TM1	BP	GO:0030195	negative regulation of blood coagulation	9/693	43/17051	4.68e-05	0.000647065	0.000454497	21825/12258/18590/18787/19218/12527/12306/18595/19091	9	Yes
TM1_BP_GO:0030198	TM1	BP	GO:0030198	extracellular matrix organization	73/693	292/17051	2.23e-37	4.69e-34	3.29e-34	14268/329941/12843/23876/12842/107581/16007/11568/20319/17022/16949/12837/53381/17392/14758/17390/54409/50706/269959/14219/54156/15530/20289/12829/21808/11820/12845/407800/67896/20356/12587/76293/21803/56693/57764/16998/12406/12832/14042/16854/11787/12828/26561/11504/14238/26427/94214/207596/13078/11804/14114/14230/12827/20682/100952/12831/80883/108075/71602/18451/77739/66180/16779/399558/81877/1…	73	Yes
TM1_BP_GO:0030199	TM1	BP	GO:0030199	collagen fibril organization	22/693	57/17051	1.65e-16	7.11e-14	4.99e-14	12843/12842/11568/20319/17022/16949/20289/21808/12845/56693/12406/12832/14042/13078/14230/100952/12831/18451/66180/81877/12306/17300	22	Yes
TM1_BP_GO:0030203	TM1	BP	GO:0030203	glycosaminoglycan metabolic process	16/693	81/17051	1.33e-07	4.19e-06	2.94e-06	13179/12111/15211/56773/21803/83921/14042/14043/94214/15212/11600/23908/209378/17300/19219/12505	16	Yes
TM1_BP_GO:0030278	TM1	BP	GO:0030278	regulation of ossification	27/693	127/17051	1.07e-12	1.65e-10	1.16e-10	16007/14758/27047/20377/17242/15251/12845/100038882/21803/12167/16998/22160/13601/21336/17313/11732/26427/17131/73121/21834/20682/381629/13386/22418/20148/19219/18605	27	Yes
TM1_BP_GO:0030279	TM1	BP	GO:0030279	negative regulation of ossification	11/693	40/17051	3.63e-07	9.8e-06	6.88e-06	20377/17242/15251/21803/16998/13601/17131/73121/20682/13386/18605	11	Yes
TM1_BP_GO:0030282	TM1	BP	GO:0030282	bone mineralization	24/693	115/17051	2.96e-11	2.62e-09	1.84e-09	12843/16007/14758/27047/14734/15251/12845/100038882/12167/16998/22160/13601/17313/11732/66695/21847/73121/20682/22411/381629/16000/13386/94249/18605	24	Yes
TM1_BP_GO:0030307	TM1	BP	GO:0030307	positive regulation of cell growth	17/693	179/17051	0.00102501	0.00785781	0.00551931	14268/20315/20319/13640/20377/15200/21808/20356/18208/17131/18186/27279/16000/11739/17387/13057/66102	17	Yes
TM1_BP_GO:0030308	TM1	BP	GO:0030308	negative regulation of cell growth	24/693	194/17051	1.21e-06	2.82e-05	1.98e-05	20564/20319/20377/17756/232441/12955/72269/21808/20356/18208/20563/14451/21803/11787/20346/18133/19063/18186/22411/74116/22418/12053/14199/18605	24	No
TM1_BP_GO:0030316	TM1	BP	GO:0030316	osteoclast differentiation	16/693	107/17051	6.43e-06	0.000118218	8.3e-05	18708/20377/14734/235505/14281/21803/16477/21847/233328/12608/13386/14683/83924/12306/14389/14118	16	Yes
TM1_BP_GO:0030323	TM1	BP	GO:0030323	respiratory tube development	34/693	211/17051	5.54e-12	6.63e-10	4.66e-10	20692/16011/13036/12654/14734/14219/52377/21809/319939/18590/11421/22762/21803/74155/16998/14042/14165/17313/14172/18121/21834/20682/21813/16000/64138/22418/18552/18595/21923/114142/16598/19378/77446/17387	34	Yes
TM1_BP_GO:0030324	TM1	BP	GO:0030324	lung development	33/693	208/17051	1.76e-11	1.76e-09	1.24e-09	20692/16011/13036/12654/14734/14219/52377/21809/319939/18590/11421/22762/21803/74155/16998/14042/14165/17313/14172/18121/21834/20682/21813/16000/64138/22418/18595/21923/114142/16598/19378/77446/17387	33	Yes
TM1_BP_GO:0030326	TM1	BP	GO:0030326	embryonic limb morphogenesis	18/693	126/17051	3.37e-06	6.78e-05	4.76e-05	20319/18933/232174/14734/20204/21808/14451/218772/22160/12288/242022/18121/110350/14683/22418/231470/19378/230857	18	No
TM1_BP_GO:0030336	TM1	BP	GO:0030336	negative regulation of cell migration	35/693	270/17051	1.3e-09	8.26e-08	5.8e-08	13179/20317/16011/21825/20315/11815/114886/20319/11819/13134/20377/13479/20563/21803/11539/18787/11601/11857/13078/20346/18121/12798/52662/18133/100952/20312/22240/22411/19252/77125/21857/29876/17319/19219/19091	35	Yes
TM1_BP_GO:0030500	TM1	BP	GO:0030500	regulation of bone mineralization	16/693	78/17051	7.64e-08	2.62e-06	1.84e-06	16007/14758/27047/15251/12845/100038882/12167/16998/22160/13601/17313/11732/73121/20682/381629/18605	16	Yes
TM1_BP_GO:0030502	TM1	BP	GO:0030502	negative regulation of bone mineralization	6/693	17/17051	3.72e-05	0.00053801	0.000377897	15251/16998/13601/73121/20682/18605	6	No
TM1_BP_GO:0030509	TM1	BP	GO:0030509	BMP signaling pathway	24/693	149/17051	7.51e-09	3.38e-07	2.38e-07	56213/16007/20319/14313/73230/20377/67888/14734/14362/20289/21808/12845/21809/21803/12167/14042/17131/18121/20482/50766/13653/22418/68010/14118	24	Yes
TM1_BP_GO:0030510	TM1	BP	GO:0030510	regulation of BMP signaling pathway	15/693	95/17051	6.3e-06	0.000117053	8.22e-05	56213/16007/20319/14313/73230/20377/14734/14362/17131/18121/20482/50766/22418/68010/14118	15	Yes
TM1_BP_GO:0030512	TM1	BP	GO:0030512	negative regulation of transforming growth factor beta receptor signaling pathway	13/693	69/17051	3.49e-06	6.96e-05	4.89e-05	56213/235505/21809/68939/65112/66695/17131/52662/20482/100952/246154/68010/14118	13	No
TM1_BP_GO:0030514	TM1	BP	GO:0030514	negative regulation of BMP signaling pathway	12/693	53/17051	1.06e-06	2.49e-05	1.75e-05	56213/20319/73230/20377/14362/17131/18121/20482/50766/22418/68010/14118	12	Yes
TM1_BP_GO:0030574	TM1	BP	GO:0030574	collagen catabolic process	7/693	34/17051	0.000366165	0.00341661	0.00239982	17392/17390/13038/13039/26561/17534/17387	7	Yes
TM1_BP_GO:0030593	TM1	BP	GO:0030593	neutrophil chemotaxis	15/693	96/17051	7.19e-06	0.000130637	9.18e-05	13616/12215/19035/21828/17242/13479/15945/13052/20563/16854/20312/14825/18578/16803/13617	15	Yes
TM1_BP_GO:0030595	TM1	BP	GO:0030595	leukocyte chemotaxis	30/693	212/17051	2.48e-09	1.33e-07	9.31e-08	21825/14456/20315/13616/18654/57266/12215/19035/21828/17242/13479/11820/15945/13052/20563/16854/18787/71660/18133/16952/20312/14825/19252/22418/18578/12642/16803/13617/17319/66102	30	Yes
TM1_BP_GO:0030850	TM1	BP	GO:0030850	prostate gland development	12/693	47/17051	2.61e-07	7.53e-06	5.29e-06	20317/20377/17390/14165/18121/20682/16952/16000/22418/21923/11835/12505	12	Yes
TM1_BP_GO:0030879	TM1	BP	GO:0030879	mammary gland development	14/693	136/17051	0.00128762	0.00946058	0.00664509	16011/15251/21809/18208/20563/21803/12583/14165/20682/12608/21813/16000/22418/11835	14	Yes
TM1_BP_GO:0030900	TM1	BP	GO:0030900	forebrain development	30/693	362/17051	0.000183809	0.00197836	0.0013896	20315/18993/11819/12558/13865/11826/17242/15251/11820/20356/24136/20563/218772/14042/14165/22187/20346/11804/18121/19218/110350/18186/22418/13175/98660/13167/19378/18187/77579/19091	30	Yes
TM1_BP_GO:0030947	TM1	BP	GO:0030947	regulation of vascular endothelial growth factor receptor signaling pathway	9/693	30/17051	1.91e-06	4.14e-05	2.91e-05	64103/15251/226101/14165/12509/14172/407831/100952/11600	9	No
TM1_BP_GO:0030949	TM1	BP	GO:0030949	positive regulation of vascular endothelial growth factor receptor signaling pathway	4/693	12/17051	0.00103106	0.00785781	0.00551931	15251/14165/14172/11600	4	No
TM1_BP_GO:0031032	TM1	BP	GO:0031032	actomyosin structure organization	21/693	202/17051	7.8e-05	0.000976977	0.000686226	17926/18708/14219/20971/21809/20194/13008/16419/21336/226751/12798/11472/18186/104027/22411/18595/11853/11856/13822/77579/19219	21	No
TM1_BP_GO:0031069	TM1	BP	GO:0031069	hair follicle morphogenesis	6/693	30/17051	0.00113545	0.00848218	0.00595786	16011/14313/21808/13039/14165/12394	6	No
TM1_BP_GO:0031099	TM1	BP	GO:0031099	regeneration	21/693	143/17051	3.27e-07	9.07e-06	6.37e-06	20315/18933/17390/17242/18039/11421/21803/18787/18081/16476/18133/16952/12608/16000/12527/16779/21923/12224/16880/15234/17319	21	Yes
TM1_BP_GO:0031214	TM1	BP	GO:0031214	biomineral tissue development	28/693	151/17051	1.36e-11	1.45e-09	1.02e-09	12843/14456/12842/16007/14758/27047/14734/15251/12845/100038882/21803/12167/16998/22160/13601/17313/11732/66695/21847/73121/20682/12608/22411/381629/16000/13386/94249/18605	28	Yes
TM1_BP_GO:0031346	TM1	BP	GO:0031346	positive regulation of cell projection organization	33/693	423/17051	0.000274138	0.00273469	0.00192084	14268/20317/20315/13640/18708/11826/216616/14362/17242/21809/18039/20356/18208/24136/66573/74055/11504/20482/20312/11881/22240/18186/27279/192167/22418/18845/331461/12492/26563/320840/15234/13405/17319	33	No
TM1_BP_GO:0031348	TM1	BP	GO:0031348	negative regulation of defense response	22/693	208/17051	4.09e-05	0.000584548	0.000410586	56213/20317/19223/56496/232345/12258/17242/54598/20563/11539/109815/16835/18133/20312/14190/16000/15937/67866/15234/22695/19219/12505	22	Yes
TM1_BP_GO:0031349	TM1	BP	GO:0031349	positive regulation of defense response	23/693	240/17051	0.000126616	0.00146402	0.00102832	18619/56312/242202/17390/17242/11820/11421/18787/16835/21817/19218/12608/14825/22418/77125/15944/16803/13617/18035/17319/19219/22038/13057	23	No
TM1_BP_GO:0031589	TM1	BP	GO:0031589	cell-substrate adhesion	51/693	349/17051	1.52e-15	4.38e-13	3.07e-13	14268/223272/21825/14456/11815/12842/107581/16007/17926/13640/12837/18708/14758/20377/68813/50706/17242/14219/54156/20971/407800/20194/67896/12587/18003/57764/16419/18787/11601/18081/109711/94214/14114/23928/100952/11472/16410/80883/18186/27279/13612/11600/12053/18552/16779/81877/320712/11856/13405/244895/17387	51	Yes
TM1_BP_GO:0031960	TM1	BP	GO:0031960	response to corticosteroid	11/693	77/17051	0.000267775	0.00268761	0.00188777	11670/11647/18708/11826/21803/12583/14573/16952/12192/16531/22695	11	Yes
TM1_BP_GO:0032102	TM1	BP	GO:0032102	negative regulation of response to external stimulus	41/693	361/17051	2.8e-09	1.45e-07	1.02e-07	56213/20317/21825/19223/56496/232345/12258/17242/53322/235505/54598/20356/18590/20563/12386/11539/18787/109815/11601/16835/20346/18133/20312/19218/14190/18186/16000/66208/19252/22418/12527/12306/18595/15937/67866/15234/17319/22695/19219/19091/12505	41	Yes
TM1_BP_GO:0032103	TM1	BP	GO:0032103	positive regulation of response to external stimulus	41/693	382/17051	1.45e-08	6.02e-07	4.23e-07	14268/21825/14456/20315/13616/18654/57266/56312/242202/17390/21828/17242/11820/15945/20356/21983/11421/20563/21803/14165/18787/16835/14172/71660/21817/20312/19218/12608/18186/14825/22418/77125/15944/234311/16803/13617/18035/17319/19219/22038/13057	41	Yes
TM1_BP_GO:0032231	TM1	BP	GO:0032231	regulation of actin filament bundle assembly	14/693	109/17051	0.000132619	0.00152078	0.00106819	17926/18708/14219/20971/21809/20194/21336/20312/18186/104027/22411/11853/11856/19219	14	Yes
TM1_BP_GO:0032233	TM1	BP	GO:0032233	positive regulation of actin filament bundle assembly	11/693	65/17051	5.58e-05	0.000747156	0.000524801	17926/14219/20971/21809/20194/21336/20312/18186/104027/22411/11853	11	Yes
TM1_BP_GO:0032330	TM1	BP	GO:0032330	regulation of chondrocyte differentiation	11/693	48/17051	2.64e-06	5.47e-05	3.84e-05	216616/17242/14219/218772/16998/17132/14172/17131/73121/21834/20682	11	Yes
TM1_BP_GO:0032331	TM1	BP	GO:0032331	negative regulation of chondrocyte differentiation	5/693	21/17051	0.00129262	0.00946893	0.00665096	216616/218772/16998/73121/20682	5	No
TM1_BP_GO:0032496	TM1	BP	GO:0032496	response to lipopolysaccharide	23/693	241/17051	0.000134747	0.00153443	0.00107778	15945/11421/21803/18787/109815/20312/19218/12608/20568/14825/14469/18578/12628/22352/56615/16803/13617/18035/17319/22695/19219/22038/66102	23	No
TM1_BP_GO:0032640	TM1	BP	GO:0032640	tumor necrosis factor production	19/693	170/17051	6.4e-05	0.000839561	0.000589706	12759/21825/14456/18708/11820/74155/22160/109815/20312/16000/11600/22418/77125/83397/16803/17319/22695/19219/13057	19	Yes
TM1_BP_GO:0032680	TM1	BP	GO:0032680	regulation of tumor necrosis factor production	19/693	164/17051	3.9e-05	0.000562852	0.000395346	12759/21825/14456/18708/11820/74155/22160/109815/20312/16000/11600/22418/77125/83397/16803/17319/22695/19219/13057	19	Yes
TM1_BP_GO:0032835	TM1	BP	GO:0032835	glomerulus development	15/693	61/17051	1.45e-08	6.02e-07	4.23e-07	11826/12829/14042/11601/70350/12828/74055/18121/13653/11600/71602/16779/18595/12628/17300	15	Yes
TM1_BP_GO:0032836	TM1	BP	GO:0032836	glomerular basement membrane development	5/693	10/17051	2.32e-05	0.000360878	0.00025348	12829/14042/12828/71602/16779	5	No
TM1_BP_GO:0032941	TM1	BP	GO:0032941	secretion by tissue	8/693	49/17051	0.000736662	0.00601587	0.00422553	18162/11826/11539/21336/14165/16531/19219/13057	8	No
TM1_BP_GO:0032956	TM1	BP	GO:0032956	regulation of actin cytoskeleton organization	30/693	353/17051	0.000118018	0.00137913	0.000968697	17926/13640/18708/14758/17242/14219/21808/20971/21809/20194/20356/231637/20563/12386/21803/13039/21336/20742/11857/170643/20312/11472/18186/104027/22411/27360/11853/11856/19219/18484	30	Yes
TM1_BP_GO:0032963	TM1	BP	GO:0032963	collagen metabolic process	29/693	106/17051	1.2e-16	5.87e-14	4.12e-14	14268/12843/12842/114886/17392/17390/13038/14789/14219/15251/20289/52377/21809/76293/21803/74155/13039/12406/18787/26561/210530/26427/100952/12831/66180/81877/17534/22352/17387	29	Yes
TM1_BP_GO:0032964	TM1	BP	GO:0032964	collagen biosynthetic process	17/693	55/17051	2.98e-11	2.62e-09	1.84e-09	14268/12842/114886/14789/14219/20289/52377/21809/21803/74155/12406/18787/26427/100952/12831/66180/22352	17	Yes
TM1_BP_GO:0032965	TM1	BP	GO:0032965	regulation of collagen biosynthetic process	11/693	46/17051	1.68e-06	3.68e-05	2.58e-05	14268/114886/14219/20289/21809/21803/74155/18787/26427/100952/22352	11	Yes
TM1_BP_GO:0032967	TM1	BP	GO:0032967	positive regulation of collagen biosynthetic process	7/693	30/17051	0.000159607	0.0017563	0.00123362	14219/20289/21809/21803/18787/26427/22352	7	Yes
TM1_BP_GO:0032970	TM1	BP	GO:0032970	regulation of actin filament-based process	36/693	399/17051	6.88e-06	0.000125949	8.85e-05	17926/13640/18708/14758/17242/14219/21808/20971/21809/20194/20356/231637/20563/12386/21803/11539/13039/21336/20742/12288/11857/12798/170643/20312/11472/19218/18186/104027/22411/18578/27360/98660/11853/11856/19219/18484	36	Yes
TM1_BP_GO:0033002	TM1	BP	GO:0033002	muscle cell proliferation	32/693	233/17051	1.56e-09	9.6e-08	6.74e-08	16011/21825/11815/18708/17390/18162/15251/15200/21808/21809/54598/13052/22762/19737/21336/16526/11504/16476/18121/21817/18133/20312/21813/13653/16000/11600/18573/17300/15446/13617/19091/13057	32	Yes
TM1_BP_GO:0033622	TM1	BP	GO:0033622	integrin activation	6/693	27/17051	0.000627899	0.00526791	0.00370017	14268/20315/107581/20312/18552/19219	6	Yes
TM1_BP_GO:0033627	TM1	BP	GO:0033627	cell adhesion mediated by integrin	11/693	69/17051	9.81e-05	0.00117418	0.000824739	223272/107581/67916/21808/16419/14042/18787/13078/18133/16410/14118	11	No
TM1_BP_GO:0033687	TM1	BP	GO:0033687	osteoblast proliferation	8/693	33/17051	4.02e-05	0.000577381	0.000405551	23876/16007/20377/18162/16477/16410/381629/68588	8	Yes
TM1_BP_GO:0033688	TM1	BP	GO:0033688	regulation of osteoblast proliferation	7/693	28/17051	9.96e-05	0.00118698	0.000833734	23876/16007/20377/18162/16410/381629/68588	7	Yes
TM1_BP_GO:0034109	TM1	BP	GO:0034109	homotypic cell-cell adhesion	11/693	72/17051	0.000145554	0.00164225	0.00115351	14268/67916/12845/13052/11735/19218/14683/12527/18595/12628/19091	11	No
TM1_BP_GO:0034329	TM1	BP	GO:0034329	cell junction assembly	42/693	409/17051	3.46e-08	1.28e-06	8.97e-07	14268/58187/11815/68792/107581/17926/64085/13640/21826/18708/14758/12558/14735/54409/14362/319387/11820/20971/20194/21983/11421/18208/109711/330222/17131/12552/11472/16410/18186/22411/192167/22418/12527/399558/246316/331461/11853/320840/11856/77446/244895/17387	42	Yes
TM1_BP_GO:0034446	TM1	BP	GO:0034446	substrate adhesion-dependent cell spreading	17/693	108/17051	1.61e-06	3.57e-05	2.51e-05	14268/17926/13640/20377/68813/50706/17242/20194/18003/57764/14114/23928/16410/80883/18186/16779/244895	17	Yes
TM1_BP_GO:0034754	TM1	BP	GO:0034754	cellular hormone metabolic process	13/693	93/17051	9.57e-05	0.00116505	0.000818326	19659/232174/30953/12167/13078/11668/13653/18595/16531/19378/230857/20148/13082	13	No
TM1_BP_GO:0035107	TM1	BP	GO:0035107	appendage morphogenesis	24/693	151/17051	9.85e-09	4.23e-07	2.97e-07	20319/18933/232174/14734/20204/21808/14451/218772/12167/22160/14042/14165/12288/242022/18121/20682/110350/14683/22418/18552/231470/18845/19378/230857	24	Yes
TM1_BP_GO:0035108	TM1	BP	GO:0035108	limb morphogenesis	24/693	151/17051	9.85e-09	4.23e-07	2.97e-07	20319/18933/232174/14734/20204/21808/14451/218772/12167/22160/14042/14165/12288/242022/18121/20682/110350/14683/22418/18552/231470/18845/19378/230857	24	Yes
TM1_BP_GO:0035113	TM1	BP	GO:0035113	embryonic appendage morphogenesis	18/693	126/17051	3.37e-06	6.78e-05	4.76e-05	20319/18933/232174/14734/20204/21808/14451/218772/22160/12288/242022/18121/110350/14683/22418/231470/19378/230857	18	No
TM1_BP_GO:0035148	TM1	BP	GO:0035148	tube formation	19/693	173/17051	8.11e-05	0.00100052	0.000702762	20319/20377/14362/15251/21808/20971/24136/21803/22160/14165/14573/18121/21817/56334/20682/13800/22418/23908/68588	19	Yes
TM1_BP_GO:0035150	TM1	BP	GO:0035150	regulation of tube size	29/693	153/17051	3.31e-12	4.06e-10	2.85e-10	13616/20657/242202/17390/68813/15251/12845/11421/11539/74617/14042/58861/21336/12291/238130/14043/12288/11548/20312/19218/60596/16531/27360/17300/98660/16598/13617/230857/19091	29	Yes
TM1_BP_GO:0035265	TM1	BP	GO:0035265	organ growth	24/693	192/17051	1e-06	2.38e-05	1.67e-05	21825/23876/21808/12845/13052/22762/218772/13601/14042/14165/16526/12288/18121/11548/20682/21813/16000/74116/11739/18595/17300/11835/77446/19091	24	Yes
TM1_BP_GO:0035272	TM1	BP	GO:0035272	exocrine system development	12/693	50/17051	5.42e-07	1.38e-05	9.68e-06	18590/57764/68151/14165/20346/21817/20682/18186/16000/17300/78908/15234	12	Yes
TM1_BP_GO:0035282	TM1	BP	GO:0035282	segmentation	12/693	96/17051	0.000506189	0.00444432	0.00312168	68713/20319/20377/24136/20346/56334/18186/22418/18845/17300/19378/18187	12	No
TM1_BP_GO:0035296	TM1	BP	GO:0035296	regulation of tube diameter	29/693	152/17051	2.79e-12	3.6e-10	2.53e-10	13616/20657/242202/17390/68813/15251/12845/11421/11539/74617/14042/58861/21336/12291/238130/14043/12288/11548/20312/19218/60596/16531/27360/17300/98660/16598/13617/230857/19091	29	Yes
TM1_BP_GO:0035455	TM1	BP	GO:0035455	response to interferon-alpha	6/693	23/17051	0.000245981	0.00249953	0.00175566	14456/66141/68713/15959/15957/22038	6	Yes
TM1_BP_GO:0035567	TM1	BP	GO:0035567	non-canonical Wnt signaling pathway	11/693	55/17051	1.08e-05	0.000183188	0.000128671	17926/20319/20377/14734/14362/69217/22411/22418/72780/68588/672511	11	Yes
TM1_BP_GO:0035767	TM1	BP	GO:0035767	endothelial cell chemotaxis	6/693	28/17051	0.00077197	0.00624189	0.00438429	21825/20356/14172/18133/18186/15370	6	Yes
TM1_BP_GO:0035914	TM1	BP	GO:0035914	skeletal muscle cell differentiation	10/693	70/17051	0.000504214	0.00443492	0.00311508	56312/14733/232174/20289/14281/13653/217082/12224/15370/11910	10	Yes
TM1_BP_GO:0035924	TM1	BP	GO:0035924	cellular response to vascular endothelial growth factor stimulus	9/693	59/17051	0.000584301	0.00498739	0.00350313	13179/18654/54409/16952/18186/18595/15370/17300/18187	9	Yes
TM1_BP_GO:0035988	TM1	BP	GO:0035988	chondrocyte proliferation	7/693	19/17051	5.84e-06	0.000109362	7.68e-05	14219/12845/14042/17131/18133/20682/17387	7	No
TM1_BP_GO:0036075	TM1	BP	GO:0036075	replacement ossification	9/693	31/17051	2.59e-06	5.39e-05	3.78e-05	12842/11647/15530/20289/14042/14172/14683/17300/17387	9	Yes
TM1_BP_GO:0036293	TM1	BP	GO:0036293	response to decreased oxygen levels	23/693	207/17051	1.24e-05	0.000208172	0.00014622	67749/11670/19223/18654/11931/20657/17390/11826/15251/12955/21808/21809/11539/22160/16526/13653/246154/68655/12192/22027/16531/13617/230857	23	Yes
TM1_BP_GO:0038034	TM1	BP	GO:0038034	signal transduction in absence of ligand	11/693	79/17051	0.00033653	0.00320717	0.00225271	17311/51795/21808/14451/16432/14165/14573/20312/16410/80707/16000	11	No
TM1_BP_GO:0038063	TM1	BP	GO:0038063	collagen-activated tyrosine kinase receptor signaling pathway	4/693	11/17051	0.000710111	0.00582814	0.00409367	12842/12828/12827/12830	4	No
TM1_BP_GO:0040013	TM1	BP	GO:0040013	negative regulation of locomotion	40/693	316/17051	1.75e-10	1.39e-08	9.73e-09	13179/20317/16011/21825/20315/11815/114886/20319/11819/13134/20377/13479/20356/20563/21803/11539/18787/11601/11857/13078/20346/18121/14114/12798/52662/18133/100952/20312/22240/18186/22411/19252/22418/77125/21857/105171/29876/17319/19219/19091	40	Yes
TM1_BP_GO:0042060	TM1	BP	GO:0042060	wound healing	46/693	339/17051	6.02e-13	1.14e-10	7.99e-11	14268/21825/14456/12842/16007/67916/11826/12258/15251/15200/21808/235505/12845/20971/13052/18590/27973/21803/226101/14042/14165/18787/18121/14114/12798/14230/16952/20312/12831/19218/27279/16000/14683/22418/12527/12306/19124/18595/12496/12628/21857/67866/77579/19219/19091/12505	46	Yes
TM1_BP_GO:0042063	TM1	BP	GO:0042063	gliogenesis	28/693	326/17051	0.00016512	0.00179294	0.00125936	14268/12759/17926/14733/67916/12558/216616/17242/215798/21808/11820/21803/14165/16835/15212/18121/23928/20682/16952/20312/16000/12527/16779/77125/22352/13167/26563/13405	28	Yes
TM1_BP_GO:0042249	TM1	BP	GO:0042249	establishment of planar polarity of embryonic epithelium	6/693	18/17051	5.38e-05	0.000734944	0.000516223	20319/20377/14362/14238/22418/68588	6	Yes
TM1_BP_GO:0042310	TM1	BP	GO:0042310	vasoconstriction	18/693	99/17051	8.45e-08	2.84e-06	1.99e-06	13616/242202/17390/68813/15251/12845/11421/58861/21336/12291/238130/12288/11548/20312/19218/27360/98660/13617	18	Yes
TM1_BP_GO:0042311	TM1	BP	GO:0042311	vasodilation	7/693	40/17051	0.00102724	0.00785781	0.00551931	11539/14042/14043/60596/16531/16598/19091	7	No
TM1_BP_GO:0042326	TM1	BP	GO:0042326	negative regulation of phosphorylation	33/693	393/17051	6.91e-05	0.000886085	0.000622384	20319/11819/56312/67916/20377/235505/19249/20563/65112/21803/74155/22160/19122/17872/17131/16476/18121/14114/52662/56334/170643/100952/233328/18769/16362/16000/11600/19252/15937/15234/13405/77446/18605	33	No
TM1_BP_GO:0042445	TM1	BP	GO:0042445	hormone metabolic process	21/693	179/17051	1.28e-05	0.000214222	0.000150469	13038/19659/232174/15251/11421/54381/30953/12167/13039/13078/114679/11668/13653/16000/18552/18595/16531/19378/230857/20148/13082	21	Yes
TM1_BP_GO:0042474	TM1	BP	GO:0042474	middle ear morphogenesis	6/693	22/17051	0.000188239	0.00201719	0.00141687	18933/20204/14451/27419/18121/231070	6	No
TM1_BP_GO:0042493	TM1	BP	GO:0042493	response to drug	24/693	217/17051	8.72e-06	0.000153411	0.000107755	14456/11670/20319/13107/20377/17390/14362/21808/13479/14281/19122/18787/14590/16476/11668/16952/21813/14683/18578/27360/54670/56615/14862/18484	24	Yes
TM1_BP_GO:0042692	TM1	BP	GO:0042692	muscle cell differentiation	33/693	386/17051	4.87e-05	0.000669766	0.000470442	16011/20315/12558/232174/54409/15081/12845/15945/13052/13008/21803/218772/226101/24052/14165/407831/11548/18133/20682/11472/16000/18807/74116/12527/11739/18595/12628/12224/54720/13405/17387/77579/19091	33	Yes
TM1_BP_GO:0042698	TM1	BP	GO:0042698	ovulation cycle	9/693	55/17051	0.00034161	0.00323672	0.00227347	17242/30953/12167/12394/11504/16952/13653/18595/19219	9	No
TM1_BP_GO:0043010	TM1	BP	GO:0043010	camera-type eye development	40/693	339/17051	1.44e-09	8.95e-08	6.29e-08	329941/12215/12837/14107/11826/15251/12955/21808/24136/14451/21803/218772/12167/22160/17132/80837/14165/18081/12288/14238/330222/27419/13078/16476/21834/20482/23928/11668/20682/18186/21813/16779/18595/12628/114142/17300/22352/19378/29876/77579	40	Yes
TM1_BP_GO:0043062	TM1	BP	GO:0043062	extracellular structure organization	74/693	293/17051	3.27e-38	1.6e-34	1.13e-34	14268/329941/12843/23876/12842/107581/16007/11568/20319/17022/16949/12837/53381/17392/14758/17390/54409/50706/269959/14219/54156/15530/20289/12829/21808/11820/12845/407800/67896/20356/12587/76293/21803/56693/57764/16998/12406/12832/14042/16854/11787/12828/26561/11504/14238/26427/94214/207596/13078/11804/14114/14230/12827/20682/100952/12831/80883/108075/71602/18451/77739/66180/16779/399558/81877/1…	74	Yes
TM1_BP_GO:0043116	TM1	BP	GO:0043116	negative regulation of vascular permeability	5/693	20/17051	0.0010186	0.00785781	0.00551931	54409/20563/11600/27494/83397	5	No
TM1_BP_GO:0043149	TM1	BP	GO:0043149	stress fiber assembly	14/693	111/17051	0.000161388	0.0017563	0.00123362	17926/18708/14219/20971/21809/20194/16419/21336/18186/104027/22411/11853/11856/19219	14	No
TM1_BP_GO:0043154	TM1	BP	GO:0043154	negative regulation of cysteine-type endopeptidase activity involved in apoptotic process	10/693	74/17051	0.000789474	0.00633677	0.00445093	21825/14456/20319/11826/12955/13479/16000/15370/15234/12505	10	No
TM1_BP_GO:0043200	TM1	BP	GO:0043200	response to amino acid	12/693	78/17051	6.84e-05	0.000879433	0.000617712	12843/12842/107581/17392/17390/12833/14658/54635/12583/12832/12608/18595	12	Yes
TM1_BP_GO:0043266	TM1	BP	GO:0043266	regulation of potassium ion transport	12/693	106/17051	0.00123429	0.00912334	0.00640822	13616/11931/11539/11735/19122/11472/19218/14825/14199/432442/17319/19091	12	No
TM1_BP_GO:0043268	TM1	BP	GO:0043268	positive regulation of potassium ion transport	9/693	51/17051	0.0001889	0.00201987	0.00141876	13616/11931/11539/11472/14825/14199/432442/17319/19091	9	Yes
TM1_BP_GO:0043405	TM1	BP	GO:0043405	regulation of MAP kinase activity	25/693	279/17051	0.000190256	0.00202995	0.00142583	21825/13616/17311/20319/16012/242202/20377/11820/21809/18590/24136/21803/54635/69183/14165/74055/14172/16000/94275/19252/22418/81877/27206/15234/17319	25	Yes
TM1_BP_GO:0043406	TM1	BP	GO:0043406	positive regulation of MAP kinase activity	21/693	206/17051	0.000103336	0.00122802	0.000862557	21825/13616/17311/16012/242202/11820/21809/18590/24136/21803/54635/69183/14165/74055/14172/16000/94275/22418/27206/15234/17319	21	Yes
TM1_BP_GO:0043410	TM1	BP	GO:0043410	positive regulation of MAPK cascade	45/693	496/17051	4.2e-07	1.1e-05	7.7e-06	21825/14456/20315/13616/17311/16012/21858/12654/73230/242202/12558/16010/14219/21808/11820/21809/18590/21983/24136/21803/54635/69183/14165/74055/14172/16476/11548/20312/18186/237353/16000/66208/11600/94275/22418/83397/18595/11835/27206/26563/13617/17318/15234/17319/12505	45	Yes
TM1_BP_GO:0043470	TM1	BP	GO:0043470	regulation of carbohydrate catabolic process	9/693	56/17051	0.000392579	0.00361497	0.00253915	56312/15251/11820/11548/54403/16000/15937/12492/17319	9	No
TM1_BP_GO:0043491	TM1	BP	GO:0043491	protein kinase B signaling	19/693	197/17051	0.000439878	0.003998	0.00280819	16011/21825/14456/20315/17926/12654/17392/67888/15200/52377/20356/18590/21983/21803/20682/20312/16000/11600/12192	19	Yes
TM1_BP_GO:0043534	TM1	BP	GO:0043534	blood vessel endothelial cell migration	14/693	116/17051	0.000257923	0.00260415	0.00182915	21825/68792/15251/20563/21803/80837/11601/14172/16952/18186/16000/11600/27494/15370	14	Yes
TM1_BP_GO:0043535	TM1	BP	GO:0043535	regulation of blood vessel endothelial cell migration	12/693	91/17051	0.000307442	0.00301183	0.0021155	21825/68792/15251/21803/80837/11601/14172/16952/18186/16000/11600/27494	12	No
TM1_BP_GO:0043536	TM1	BP	GO:0043536	positive regulation of blood vessel endothelial cell migration	11/693	56/17051	1.29e-05	0.000214498	0.000150663	21825/68792/15251/21803/80837/14172/16952/18186/16000/11600/27494	11	Yes
TM1_BP_GO:0043542	TM1	BP	GO:0043542	endothelial cell migration	27/693	207/17051	8.86e-08	2.96e-06	2.08e-06	13179/20317/20692/21825/68792/11819/12215/67916/73230/15251/20356/20563/21803/80837/11601/14645/14172/13078/18133/16952/16410/18186/16000/11600/27494/22418/15370	27	Yes
TM1_BP_GO:0043567	TM1	BP	GO:0043567	regulation of insulin-like growth factor receptor signaling pathway	6/693	23/17051	0.000245981	0.00249953	0.00175566	16008/16011/16012/16010/16000/11835	6	No
TM1_BP_GO:0043568	TM1	BP	GO:0043568	positive regulation of insulin-like growth factor receptor signaling pathway	4/693	10/17051	0.000466861	0.00415853	0.00292094	16011/16010/16000/11835	4	No
TM1_BP_GO:0043583	TM1	BP	GO:0043583	ear development	24/693	224/17051	1.49e-05	0.000242556	0.000170371	57266/73230/18933/20204/12609/21808/20971/18208/14451/17132/14165/242022/27419/18121/20682/231070/16000/22418/320398/68588/16531/54670/26563/230857	24	No
TM1_BP_GO:0043588	TM1	BP	GO:0043588	skin development	26/693	254/17051	1.51e-05	0.000243871	0.000171294	12843/16011/12842/14313/232174/21808/235505/12845/18590/74155/13039/12832/14165/12394/20682/16952/12831/14683/22418/231470/12192/17300/105171/13167/29876/22695	26	Yes
TM1_BP_GO:0043618	TM1	BP	GO:0043618	regulation of transcription from RNA polymerase II promoter in response to stress	8/693	46/17051	0.000474414	0.00419536	0.00294681	15251/17872/26427/16476/12608/13653/16598/11910	8	Yes
TM1_BP_GO:0043620	TM1	BP	GO:0043620	regulation of DNA-templated transcription in response to stress	8/693	51/17051	0.000968553	0.00750973	0.00527481	15251/17872/26427/16476/12608/13653/16598/11910	8	Yes
TM1_BP_GO:0044062	TM1	BP	GO:0044062	regulation of excretion	6/693	30/17051	0.00113545	0.00848218	0.00595786	11421/11539/21336/19218/14683/19219	6	No
TM1_BP_GO:0044342	TM1	BP	GO:0044342	type B pancreatic cell proliferation	8/693	25/17051	4.18e-06	8.21e-05	5.77e-05	16011/56312/11534/20377/16010/74155/18133/15370	8	Yes
TM1_BP_GO:0044344	TM1	BP	GO:0044344	cellular response to fibroblast growth factor stimulus	16/693	88/17051	4.4e-07	1.14e-05	8.03e-06	21825/14733/20377/14219/14042/14165/14043/14172/26427/18121/22418/399558/12192/15370/22695/12505	16	Yes
TM1_BP_GO:0044557	TM1	BP	GO:0044557	relaxation of smooth muscle	4/693	12/17051	0.00103106	0.00785781	0.00551931	11539/60596/16531/19091	4	No
TM1_BP_GO:0044706	TM1	BP	GO:0044706	multi-multicellular organism process	19/693	146/17051	7.37e-06	0.0001325	9.31e-05	16011/19223/11819/16157/232345/17390/15081/13039/67968/16477/21336/15212/11857/56334/18552/21857/11835/27206/15446	19	Yes
TM1_BP_GO:0045137	TM1	BP	GO:0045137	development of primary sexual characteristics	27/693	210/17051	1.2e-07	3.83e-06	2.69e-06	17311/20319/56312/13134/53381/14313/20377/17390/15081/21808/22762/30953/12167/12394/18787/22187/11504/20346/20682/16410/12608/11600/22418/18595/17300/11835/19219	27	Yes
TM1_BP_GO:0045229	TM1	BP	GO:0045229	external encapsulating structure organization	73/693	293/17051	2.87e-37	4.69e-34	3.29e-34	14268/329941/12843/23876/12842/107581/16007/11568/20319/17022/16949/12837/53381/17392/14758/17390/54409/50706/269959/14219/54156/15530/20289/12829/21808/11820/12845/407800/67896/20356/12587/76293/21803/56693/57764/16998/12406/12832/14042/16854/11787/12828/26561/11504/14238/26427/94214/207596/13078/11804/14114/14230/12827/20682/100952/12831/80883/108075/71602/18451/77739/66180/16779/399558/81877/1…	73	Yes
TM1_BP_GO:0045444	TM1	BP	GO:0045444	fat cell differentiation	26/693	252/17051	1.31e-05	0.000216318	0.000151941	20319/20377/117167/24117/53322/12609/22762/20318/21803/108012/14165/71660/12608/12395/231070/16000/13386/22418/16913/12192/18595/74186/12224/15370/22695/18605	26	Yes
TM1_BP_GO:0045581	TM1	BP	GO:0045581	negative regulation of T cell differentiation	8/693	47/17051	0.000551667	0.00475849	0.00334235	17242/12394/17131/16952/14190/16362/12053/12505	8	No
TM1_BP_GO:0045598	TM1	BP	GO:0045598	regulation of fat cell differentiation	18/693	144/17051	2.23e-05	0.00034898	0.000245122	20319/20377/24117/53322/22762/21803/71660/12608/12395/231070/16000/13386/22418/12192/74186/12224/22695/18605	18	Yes
TM1_BP_GO:0045600	TM1	BP	GO:0045600	positive regulation of fat cell differentiation	10/693	68/17051	0.000397466	0.00365311	0.00256594	20319/20377/24117/71660/12608/16000/12192/74186/12224/22695	10	No
TM1_BP_GO:0045616	TM1	BP	GO:0045616	regulation of keratinocyte differentiation	6/693	29/17051	0.000940282	0.00733689	0.00515341	21808/235505/74155/12192/17300/22695	6	Yes
TM1_BP_GO:0045620	TM1	BP	GO:0045620	negative regulation of lymphocyte differentiation	9/693	56/17051	0.000392579	0.00361497	0.00253915	20377/17242/12394/17131/16952/14190/16362/12053/12505	9	No
TM1_BP_GO:0045637	TM1	BP	GO:0045637	regulation of myeloid cell differentiation	19/693	196/17051	0.000412737	0.00377228	0.00264964	17311/18708/20377/19659/15251/14281/100038882/21803/12394/16476/21847/12608/13386/14683/83924/12192/14118/18035/22695	19	Yes
TM1_BP_GO:0045667	TM1	BP	GO:0045667	regulation of osteoblast differentiation	19/693	135/17051	2.28e-06	4.86e-05	3.41e-05	16011/16007/20319/20377/12609/12167/22160/16478/18121/20682/50766/12608/381629/16000/13386/14683/68588/68010/19219	19	Yes
TM1_BP_GO:0045668	TM1	BP	GO:0045668	negative regulation of osteoblast differentiation	8/693	52/17051	0.0011046	0.00831496	0.00584041	16011/20377/22160/18121/20682/50766/13386/68010	8	Yes
TM1_BP_GO:0045669	TM1	BP	GO:0045669	positive regulation of osteoblast differentiation	11/693	71/17051	0.000127937	0.00147398	0.00103532	16007/20319/12609/12167/16478/12608/381629/16000/14683/68588/19219	11	Yes
TM1_BP_GO:0045765	TM1	BP	GO:0045765	regulation of angiogenesis	46/693	281/17051	4.92e-16	1.86e-13	1.31e-13	13179/20317/20692/21825/23876/13036/20319/19223/21826/64103/18654/12654/73230/54409/11826/17242/15251/21808/15945/20356/13601/58861/16854/80837/12394/18787/11601/12828/14645/11504/12509/14172/26427/13078/12827/100952/20312/18186/21813/27279/27494/22418/12226/17300/16598/15234	46	Yes
TM1_BP_GO:0045766	TM1	BP	GO:0045766	positive regulation of angiogenesis	26/693	163/17051	2.21e-09	1.24e-07	8.74e-08	21825/13036/20319/19223/18654/12654/73230/54409/11826/17242/15251/20356/13601/58861/16854/12394/18787/11601/14172/13078/20312/18186/21813/22418/12226/15234	26	Yes
TM1_BP_GO:0045778	TM1	BP	GO:0045778	positive regulation of ossification	9/693	57/17051	0.00044965	0.00404405	0.00284053	16007/14758/100038882/12167/21336/21834/381629/22418/19219	9	No
TM1_BP_GO:0045785	TM1	BP	GO:0045785	positive regulation of cell adhesion	50/693	429/17051	1.89e-11	1.85e-09	1.3e-09	14268/16008/21825/20315/11906/107581/16007/17926/12837/67916/11534/68813/17242/54156/21808/20971/407800/20194/67896/18003/21803/11735/13848/14924/12394/18081/94214/17131/14114/21817/16952/100952/20312/16410/17909/18186/21813/16362/13612/16000/11600/15505/22418/12053/18552/54446/320712/13405/19219/12505	50	Yes
TM1_BP_GO:0045860	TM1	BP	GO:0045860	positive regulation of protein kinase activity	37/693	432/17051	1.66e-05	0.000264625	0.000185872	12759/21825/14456/16007/13616/17311/16012/12654/242202/15200/21808/11820/20971/21809/18590/11421/18003/24136/21803/11539/54635/19122/69183/14165/74055/14172/21813/13653/16000/11600/94275/15505/22418/27206/14118/15234/17319	37	Yes
TM1_BP_GO:0045861	TM1	BP	GO:0045861	negative regulation of proteolysis	32/693	285/17051	2.04e-07	6.1e-06	4.29e-06	20317/21825/14456/13010/20319/21858/18708/232345/11826/12258/14734/12955/235505/13479/11820/56374/14451/13601/12406/18787/68581/20568/16000/64138/74116/15370/21857/209378/13014/67866/15234/12505	32	Yes
TM1_BP_GO:0045906	TM1	BP	GO:0045906	negative regulation of vasoconstriction	5/693	13/17051	0.000107154	0.00126421	0.000887976	17390/68813/15251/238130/20312	5	No
TM1_BP_GO:0045926	TM1	BP	GO:0045926	negative regulation of growth	32/693	255/17051	1.47e-08	6.02e-07	4.23e-07	16011/20564/20319/20377/17756/14734/232441/15251/12955/72269/21808/20356/13052/18208/20563/14451/21803/11787/16526/20346/18121/18133/19063/18186/21813/22411/14683/74116/22418/12053/14199/18605	32	Yes
TM1_BP_GO:0045932	TM1	BP	GO:0045932	negative regulation of muscle contraction	10/693	29/17051	1.15e-07	3.7e-06	2.6e-06	242202/68813/54598/11539/238130/60596/16531/98660/19219/19091	10	No
TM1_BP_GO:0045936	TM1	BP	GO:0045936	negative regulation of phosphate metabolic process	38/693	487/17051	9.64e-05	0.00116548	0.000818633	20319/11819/56312/67916/20377/72269/21808/235505/19249/18590/20563/65112/21803/74155/22160/19122/338367/17872/17131/16476/18121/14114/52662/56334/170643/100952/233328/18769/16362/16000/11600/19252/15937/15234/13405/77446/19091/18605	38	No
TM1_BP_GO:0045986	TM1	BP	GO:0045986	negative regulation of smooth muscle contraction	8/693	19/17051	3.63e-07	9.8e-06	6.88e-06	68813/54598/11539/238130/60596/16531/19219/19091	8	No
TM1_BP_GO:0046545	TM1	BP	GO:0046545	development of primary female sexual characteristics	18/693	109/17051	3.83e-07	1.01e-05	7.1e-06	17311/56312/13134/14313/20377/17390/22762/30953/12167/12394/18787/22187/11504/12608/11600/18595/17300/19219	18	Yes
TM1_BP_GO:0046546	TM1	BP	GO:0046546	development of primary male sexual characteristics	13/693	118/17051	0.00101471	0.00784282	0.00550878	20319/56312/53381/20377/15081/21808/22762/22187/20346/20682/22418/18595/11835	13	Yes
TM1_BP_GO:0046660	TM1	BP	GO:0046660	female sex differentiation	20/693	125/17051	1.49e-07	4.64e-06	3.26e-06	17311/56312/13134/14313/20377/17390/22762/30953/12167/14165/12394/18787/22187/11504/12608/11600/22418/18595/17300/19219	20	Yes
TM1_BP_GO:0046849	TM1	BP	GO:0046849	bone remodeling	13/693	101/17051	0.000223428	0.00232821	0.00163533	20377/13038/17242/16998/14042/233328/16410/13386/66180/83924/68588/19219/18605	13	No
TM1_BP_GO:0048009	TM1	BP	GO:0048009	insulin-like growth factor receptor signaling pathway	7/693	34/17051	0.000366165	0.00341661	0.00239982	16008/16011/16012/18708/16010/16000/11835	7	No
TM1_BP_GO:0048010	TM1	BP	GO:0048010	vascular endothelial growth factor receptor signaling pathway	12/693	48/17051	3.35e-07	9.19e-06	6.45e-06	64103/18654/15251/226101/14165/12509/14172/407831/100952/18186/11600/17300	12	Yes
TM1_BP_GO:0048015	TM1	BP	GO:0048015	phosphatidylinositol-mediated signaling	19/693	165/17051	4.24e-05	0.000600091	0.000421502	14268/13179/17926/18708/18162/21808/19249/18590/22160/54635/74055/20682/16000/11600/12192/18595/14389/26563/15234	19	No
TM1_BP_GO:0048017	TM1	BP	GO:0048017	inositol lipid-mediated signaling	19/693	168/17051	5.44e-05	0.000737581	0.000518075	14268/13179/17926/18708/18162/21808/19249/18590/22160/54635/74055/20682/16000/11600/12192/18595/14389/26563/15234	19	No
TM1_BP_GO:0048041	TM1	BP	GO:0048041	focal adhesion assembly	14/693	82/17051	5e-06	9.58e-05	6.73e-05	11815/107581/17926/13640/14758/20971/20194/109711/11472/16410/18186/11856/244895/17387	14	No
TM1_BP_GO:0048144	TM1	BP	GO:0048144	fibroblast proliferation	20/693	107/17051	9.92e-09	4.23e-07	2.97e-07	14268/14456/56312/13134/20377/11826/14319/18590/21803/54635/14165/18787/16476/14114/16000/22418/12306/18595/13617/17319	20	Yes
TM1_BP_GO:0048145	TM1	BP	GO:0048145	regulation of fibroblast proliferation	19/693	105/17051	4.01e-08	1.46e-06	1.03e-06	14268/14456/56312/13134/20377/11826/14319/18590/21803/54635/14165/18787/16476/14114/16000/22418/12306/18595/17319	19	Yes
TM1_BP_GO:0048146	TM1	BP	GO:0048146	positive regulation of fibroblast proliferation	15/693	67/17051	5.67e-08	1.97e-06	1.39e-06	14268/14456/11826/18590/21803/54635/14165/18787/16476/14114/16000/22418/12306/18595/17319	15	Yes
TM1_BP_GO:0048247	TM1	BP	GO:0048247	lymphocyte chemotaxis	8/693	50/17051	0.000846254	0.00671278	0.00471504	14456/20315/57266/15945/20312/22418/12642/66102	8	No
TM1_BP_GO:0048251	TM1	BP	GO:0048251	elastic fiber assembly	7/693	11/17051	5.09e-08	1.81e-06	1.27e-06	23876/76293/16998/207596/100952/108075/81877	7	Yes
TM1_BP_GO:0048286	TM1	BP	GO:0048286	lung alveolus development	11/693	61/17051	3.02e-05	0.000451868	0.000317391	16011/21809/319939/18590/11421/21803/74155/16998/14165/16000/114142	11	Yes
TM1_BP_GO:0048512	TM1	BP	GO:0048512	circadian behavior	9/693	57/17051	0.00044965	0.00404405	0.00284053	11906/11539/27419/19218/13653/192167/16531/19215/19219	9	No
TM1_BP_GO:0048545	TM1	BP	GO:0048545	response to steroid hormone	19/693	202/17051	0.000600066	0.0051042	0.00358518	67749/11670/11647/18708/20377/11826/21808/21809/21803/12583/14573/11548/16952/16000/12192/16531/11835/98660/22695	19	Yes
TM1_BP_GO:0048562	TM1	BP	GO:0048562	embryonic organ morphogenesis	29/693	286/17051	5.92e-06	0.00011045	7.76e-05	18933/15251/20204/15530/21808/21809/18208/14451/218772/22160/14165/14238/27419/18121/11668/56334/20682/21813/50530/22411/231070/14683/22418/320398/17150/68588/18595/19378/17387	29	Yes
TM1_BP_GO:0048565	TM1	BP	GO:0048565	digestive tract development	15/693	109/17051	3.42e-05	0.000504393	0.000354284	20319/20377/15251/18590/218772/54635/14042/14165/14238/71660/22418/18552/18595/12224/19378	15	Yes
TM1_BP_GO:0048566	TM1	BP	GO:0048566	embryonic digestive tract development	7/693	31/17051	0.000198994	0.00211399	0.00148486	218772/14165/14238/71660/18552/18595/19378	7	No
TM1_BP_GO:0048568	TM1	BP	GO:0048568	embryonic organ development	47/693	457/17051	4.96e-09	2.36e-07	1.66e-07	16007/17311/11819/18933/15251/20204/15530/21808/21809/18590/18208/22762/14451/21803/218772/22160/54635/16477/14165/12394/14238/27419/71660/14573/18121/11668/56334/20682/16410/12608/21813/50530/22411/231070/14683/22418/18552/320398/72780/17150/12192/68588/18595/17300/27206/19378/17387	47	Yes
TM1_BP_GO:0048588	TM1	BP	GO:0048588	developmental cell growth	27/693	257/17051	6.41e-06	0.000118218	8.3e-05	14268/20315/20564/13640/50706/17756/11820/20356/18208/24136/20563/17131/20346/11548/20682/18186/21813/27279/16000/74116/22418/12934/16779/11739/13175/18187/19091	27	No
TM1_BP_GO:0048592	TM1	BP	GO:0048592	eye morphogenesis	19/693	175/17051	9.47e-05	0.00115648	0.000812306	329941/12837/14107/11826/15251/14451/218772/22160/12832/14238/330222/27419/21834/11668/20682/12831/50530/17150/12628	19	Yes
TM1_BP_GO:0048608	TM1	BP	GO:0048608	reproductive structure development	46/693	427/17051	1.66e-09	9.95e-08	6.99e-08	56213/20317/16007/17311/20319/19223/11819/56312/53381/16157/14313/20377/17390/15081/15251/21808/22762/30953/12167/13039/16477/14165/12394/18787/22187/11504/14238/20346/18121/56334/20682/16952/16410/12608/16000/11600/22418/72780/12192/18595/21923/17300/11835/27206/19219/12505	46	Yes
TM1_BP_GO:0048638	TM1	BP	GO:0048638	regulation of developmental growth	29/693	379/17051	0.000856413	0.00676298	0.0047503	14268/20315/13640/19035/17756/11820/20356/13052/18208/22762/20563/18787/16526/12288/17131/20346/18121/18186/21813/27279/16000/14683/74116/22418/12934/11739/17300/11835/19219	29	No
TM1_BP_GO:0048659	TM1	BP	GO:0048659	smooth muscle cell proliferation	25/693	172/17051	3.09e-08	1.16e-06	8.14e-07	16011/21825/11815/18708/17390/18162/15251/15200/21809/54598/19737/21336/11504/16476/21817/18133/20312/21813/13653/16000/18573/15446/13617/19091/13057	25	Yes
TM1_BP_GO:0048660	TM1	BP	GO:0048660	regulation of smooth muscle cell proliferation	23/693	167/17051	2.97e-07	8.49e-06	5.96e-06	16011/21825/11815/18708/17390/18162/15251/15200/21809/54598/19737/21336/11504/16476/21817/20312/21813/13653/16000/18573/15446/19091/13057	23	Yes
TM1_BP_GO:0048661	TM1	BP	GO:0048661	positive regulation of smooth muscle cell proliferation	15/693	107/17051	2.74e-05	0.000414996	0.000291492	16011/21825/17390/15251/15200/54598/11504/16476/21817/20312/21813/13653/16000/15446/13057	15	Yes
TM1_BP_GO:0048675	TM1	BP	GO:0048675	axon extension	15/693	132/17051	0.000306706	0.00301183	0.0021155	14268/20315/20564/17756/20356/18208/20563/20346/18186/27279/22418/12934/16779/13175/18187	15	No
TM1_BP_GO:0048701	TM1	BP	GO:0048701	embryonic cranial skeleton morphogenesis	10/693	49/17051	2.25e-05	0.000351704	0.000247036	18933/20204/21808/21809/14451/22160/21813/14683/18595/17387	10	Yes
TM1_BP_GO:0048704	TM1	BP	GO:0048704	embryonic skeletal system morphogenesis	12/693	87/17051	0.000200353	0.00211926	0.00148856	18933/20204/15530/21808/21809/14451/22160/18121/21813/14683/18595/17387	12	Yes
TM1_BP_GO:0048705	TM1	BP	GO:0048705	skeletal system morphogenesis	37/693	217/17051	1.05e-13	2.24e-11	1.58e-11	21825/12842/20319/11647/20377/18933/17390/232174/14219/20204/15530/20289/21808/12845/12643/21809/30953/14451/218772/12167/16998/22160/12406/14042/14043/14172/18121/73121/20682/80707/21813/231070/14683/18595/17300/20148/17387	37	Yes
TM1_BP_GO:0048706	TM1	BP	GO:0048706	embryonic skeletal system development	18/693	114/17051	7.61e-07	1.89e-05	1.33e-05	12842/18933/20204/15530/20289/21808/21809/14451/22160/14042/18121/21813/13386/14683/22418/18552/18595/17387	18	Yes
TM1_BP_GO:0048732	TM1	BP	GO:0048732	gland development	35/693	417/17051	4.24e-05	0.000600091	0.000421502	20317/16011/20377/17390/17242/15251/21809/18590/18208/20563/21803/57764/68151/12583/14165/12394/14172/16476/20346/18121/21817/20682/16952/12608/18186/21813/16000/22418/18595/21923/17300/11835/78908/15234/12505	35	Yes
TM1_BP_GO:0048736	TM1	BP	GO:0048736	appendage development	27/693	178/17051	3.38e-09	1.66e-07	1.17e-07	20319/11819/18933/232174/14734/20204/20289/21808/12845/14451/218772/12167/22160/14042/14165/12288/242022/18121/20682/110350/14683/22418/18552/231470/18845/19378/230857	27	Yes
TM1_BP_GO:0048738	TM1	BP	GO:0048738	cardiac muscle tissue development	24/693	245/17051	6.44e-05	0.000839894	0.000589939	15530/21808/13052/22762/21803/218772/24052/16526/17131/18121/11548/11472/21813/16000/11600/74116/22418/11739/18595/17300/19378/77446/77579/19091	24	No
TM1_BP_GO:0048754	TM1	BP	GO:0048754	branching morphogenesis of an epithelial tube	29/693	176/17051	1.18e-10	9.78e-09	6.87e-09	20315/13036/20319/18654/14734/17242/20356/20563/21803/14042/14165/17313/14573/18121/20682/18186/21813/16000/11600/94275/64138/22418/18595/21923/11835/29876/13617/17387/12505	29	Yes
TM1_BP_GO:0048762	TM1	BP	GO:0048762	mesenchymal cell differentiation	36/693	222/17051	1.08e-12	1.65e-10	1.16e-10	14268/12842/13616/17311/20319/12558/20377/13876/67888/17242/15251/21808/21809/20356/24136/21803/22160/14042/14165/17131/20346/14573/18121/52662/20682/18186/21813/246154/22411/22418/17300/19378/68010/13617/18187/13082	36	Yes
TM1_BP_GO:0048771	TM1	BP	GO:0048771	tissue remodeling	28/693	186/17051	2.07e-09	1.2e-07	8.45e-08	16011/20377/17390/13038/21828/13876/17242/15251/21808/16998/14042/14165/11601/11548/21817/233328/16410/16000/13386/66180/83924/72780/68588/21857/17300/17387/19219/18605	28	Yes
TM1_BP_GO:0048839	TM1	BP	GO:0048839	inner ear development	21/693	196/17051	5.03e-05	0.000688923	0.000483898	57266/73230/18933/20204/12609/21808/20971/18208/17132/14165/242022/27419/20682/231070/16000/22418/320398/68588/16531/54670/26563	21	No
TM1_BP_GO:0048844	TM1	BP	GO:0048844	artery morphogenesis	14/693	72/17051	9.88e-07	2.35e-05	1.65e-05	18933/17242/20204/21808/12845/16835/17131/18121/14230/18186/22411/17300/15446/19219	14	Yes
TM1_BP_GO:0048846	TM1	BP	GO:0048846	axon extension involved in axon guidance	8/693	36/17051	7.87e-05	0.000976977	0.000686226	20315/20564/20356/20563/20346/18186/22418/18187	8	No
TM1_BP_GO:0048863	TM1	BP	GO:0048863	stem cell differentiation	25/693	205/17051	9.56e-07	2.31e-05	1.62e-05	14268/13616/17311/12558/232345/20377/14362/15251/21808/20356/24136/16998/22160/76626/14042/20346/14573/20682/18186/18595/17300/19378/13617/18187/13082	25	Yes
TM1_BP_GO:0048864	TM1	BP	GO:0048864	stem cell development	18/693	86/17051	8.41e-09	3.72e-07	2.61e-07	14268/13616/17311/12558/15251/20356/24136/22160/76626/20346/14573/20682/18186/17300/19378/13617/18187/13082	18	Yes
TM1_BP_GO:0048880	TM1	BP	GO:0048880	sensory system development	45/693	391/17051	3.01e-10	2.2e-08	1.55e-08	329941/12215/12837/14107/11826/15251/12955/21808/24136/14451/21803/218772/12167/22160/12832/17132/80837/14165/18081/12288/242022/14238/330222/27419/13078/16476/21834/20482/23928/11668/20682/12831/18186/21813/50530/16779/17150/18595/12628/114142/17300/22352/19378/29876/77579	45	Yes
TM1_BP_GO:0050673	TM1	BP	GO:0050673	epithelial cell proliferation	55/693	424/17051	2.08e-14	4.64e-12	3.26e-12	329941/56213/20317/20692/16011/21825/20315/20319/64103/18654/11819/12837/56312/14313/73230/11534/20377/16010/21828/14734/17242/21808/235505/20356/13052/14451/21803/74155/22160/13039/13601/21336/14165/12828/14645/14172/16476/18121/18133/20682/12608/16000/13386/94275/22418/12192/15370/114142/11835/19378/13617/67866/15234/22695/13057	55	Yes
TM1_BP_GO:0050678	TM1	BP	GO:0050678	regulation of epithelial cell proliferation	45/693	361/17051	2.09e-11	1.97e-09	1.38e-09	56213/20317/20692/21825/20315/20319/64103/18654/11819/56312/20377/21828/14734/17242/21808/235505/20356/13052/14451/21803/74155/22160/13039/13601/21336/14165/12828/14645/14172/16476/18121/20682/16000/13386/94275/22418/12192/15370/114142/11835/19378/13617/67866/22695/13057	45	Yes
TM1_BP_GO:0050679	TM1	BP	GO:0050679	positive regulation of epithelial cell proliferation	25/693	199/17051	5.45e-07	1.38e-05	9.69e-06	56213/20315/18654/20377/21828/17242/20356/13052/14451/21803/22160/13601/21336/14165/14645/14172/16476/18121/20682/16000/22418/15370/114142/11835/13057	25	Yes
TM1_BP_GO:0050680	TM1	BP	GO:0050680	negative regulation of epithelial cell proliferation	21/693	143/17051	3.27e-07	9.07e-06	6.37e-06	20317/20692/21825/20319/64103/11819/56312/20377/14734/21808/235505/14451/21803/13039/12828/20682/13386/94275/22418/11835/67866	21	Yes
TM1_BP_GO:0050727	TM1	BP	GO:0050727	regulation of inflammatory response	34/693	322/17051	3.69e-07	9.86e-06	6.92e-06	20317/19223/56312/242202/17242/11820/54598/11421/20563/11539/18787/109815/16835/21817/18133/16952/20312/19218/12608/16000/22418/12053/77125/15937/16803/625249/13617/67866/15234/18035/17319/22695/19219/12505	34	Yes
TM1_BP_GO:0050728	TM1	BP	GO:0050728	negative regulation of inflammatory response	17/693	134/17051	3.08e-05	0.00045965	0.000322857	20317/19223/17242/54598/20563/11539/109815/16835/18133/20312/16000/15937/67866/15234/22695/19219/12505	17	Yes
TM1_BP_GO:0050729	TM1	BP	GO:0050729	positive regulation of inflammatory response	17/693	125/17051	1.23e-05	0.000206707	0.00014519	56312/242202/17242/11820/11421/18787/16835/21817/19218/12608/22418/77125/16803/13617/18035/17319/19219	17	No
TM1_BP_GO:0050730	TM1	BP	GO:0050730	regulation of peptidyl-tyrosine phosphorylation	32/693	255/17051	1.47e-08	6.02e-07	4.23e-07	14456/17311/20319/13640/67916/20377/21828/15200/11820/18590/11421/18003/21803/74155/11539/54635/19122/14165/14573/11804/12931/233328/18186/16362/16000/11600/15505/18595/15234/17319/19219/12505	32	Yes
TM1_BP_GO:0050731	TM1	BP	GO:0050731	positive regulation of peptidyl-tyrosine phosphorylation	25/693	189/17051	2.02e-07	6.08e-06	4.27e-06	14456/17311/13640/67916/21828/15200/11820/11421/18003/21803/11539/19122/14165/14573/12931/233328/18186/16000/11600/15505/18595/15234/17319/19219/12505	25	Yes
TM1_BP_GO:0050770	TM1	BP	GO:0050770	regulation of axonogenesis	18/693	181/17051	0.0004268	0.00388633	0.00272975	14268/20315/13640/12558/17756/18040/18039/20356/18208/24136/20563/20346/20482/18186/27279/22418/18845/22352	18	No
TM1_BP_GO:0050803	TM1	BP	GO:0050803	regulation of synapse structure or activity	25/693	263/17051	7.46e-05	0.00095152	0.000668346	20692/68792/64085/13640/21826/18708/12558/14735/14362/319387/11820/21983/18208/12386/19122/72289/192167/22418/399558/331461/18187/320840/22142/15481/77579	25	No
TM1_BP_GO:0050807	TM1	BP	GO:0050807	regulation of synapse organization	25/693	255/17051	4.5e-05	0.00062987	0.000442419	20692/68792/64085/13640/21826/18708/12558/14735/14362/319387/11820/21983/18208/12386/19122/72289/192167/22418/399558/331461/18187/320840/22142/15481/77579	25	No
TM1_BP_GO:0050808	TM1	BP	GO:0050808	synapse organization	42/693	474/17051	1.89e-06	4.13e-05	2.9e-05	20692/68792/64085/13640/21826/18708/12558/14735/14362/319387/18027/11820/18039/21983/231637/18208/12386/14658/11735/19122/208898/72289/67533/109711/330222/14573/80883/18186/104027/192167/22418/16779/399558/246316/21923/12830/331461/18187/320840/22142/15481/77579	42	No
TM1_BP_GO:0050817	TM1	BP	GO:0050817	coagulation	19/693	162/17051	3.29e-05	0.000485686	0.000341145	14268/21825/14456/12258/12845/18590/27973/18787/14114/20312/19218/14683/12527/12306/19124/18595/12496/12628/19091	19	Yes
TM1_BP_GO:0050818	TM1	BP	GO:0050818	regulation of coagulation	11/693	65/17051	5.58e-05	0.000747156	0.000524801	21825/12258/18590/27973/18787/19218/12527/12306/19124/18595/19091	11	Yes
TM1_BP_GO:0050819	TM1	BP	GO:0050819	negative regulation of coagulation	10/693	45/17051	1.01e-05	0.000174832	0.000122801	21825/12258/18590/18787/19218/12527/12306/19124/18595/19091	10	Yes
TM1_BP_GO:0050866	TM1	BP	GO:0050866	negative regulation of cell activation	24/693	205/17051	3.25e-06	6.62e-05	4.65e-05	114886/242202/20377/17242/20971/18590/21803/19122/16854/12394/16835/17131/16952/100952/20312/19218/14190/12608/16362/12527/12053/18595/19091/12505	24	Yes
TM1_BP_GO:0050868	TM1	BP	GO:0050868	negative regulation of T cell activation	14/693	118/17051	0.000308554	0.0030167	0.00211892	242202/17242/20971/21803/19122/16854/12394/17131/16952/14190/12608/16362/12053/12505	14	No
TM1_BP_GO:0050878	TM1	BP	GO:0050878	regulation of body fluid levels	33/693	317/17051	7.56e-07	1.89e-05	1.33e-05	14268/21825/14456/18162/232174/11826/12258/15251/12845/18590/27973/11539/12583/14042/21336/14165/18787/14043/14114/20312/19218/14683/12527/12306/19124/18595/16531/12496/12628/77446/19219/19091/13057	33	Yes
TM1_BP_GO:0050885	TM1	BP	GO:0050885	neuromuscular process controlling balance	10/693	66/17051	0.000310222	0.00302097	0.00212192	15211/11820/18039/108012/319984/15212/11804/14667/16531/77579	10	No
TM1_BP_GO:0050886	TM1	BP	GO:0050886	endocrine process	11/693	88/17051	0.000857085	0.00676298	0.0047503	78896/13616/11826/11421/21336/12394/114679/14683/230857/17319/13057	11	No
TM1_BP_GO:0050890	TM1	BP	GO:0050890	cognition	28/693	324/17051	0.000148897	0.00167228	0.00117461	20317/242202/17242/15251/11820/21983/108012/11539/319984/19122/17159/21336/12288/16835/208431/16476/18121/11548/14667/19063/104027/13653/16000/14683/114142/54720/98660/13167	28	No
TM1_BP_GO:0050900	TM1	BP	GO:0050900	leukocyte migration	44/693	347/17051	1.98e-11	1.9e-09	1.34e-09	21825/14456/20315/11815/13616/17311/18654/57266/12215/19035/21828/17242/13479/11820/15945/13052/20563/21803/11539/13601/67374/14042/16854/21336/18787/71660/18133/16952/100952/20312/19218/14825/19252/22418/12527/77125/18578/12642/16803/13617/17319/17387/19219/66102	44	Yes
TM1_BP_GO:0050905	TM1	BP	GO:0050905	neuromuscular process	16/693	134/17051	0.000109102	0.00128103	0.000899794	18619/27386/15211/11820/12845/18039/12386/108012/319984/14658/15212/11804/14667/16531/12628/77579	16	No
TM1_BP_GO:0050918	TM1	BP	GO:0050918	positive chemotaxis	10/693	45/17051	1.01e-05	0.000174832	0.000122801	20315/18654/20356/16854/14165/11601/20312/18186/11600/22418	10	Yes
TM1_BP_GO:0050919	TM1	BP	GO:0050919	negative chemotaxis	8/693	44/17051	0.000346119	0.00327313	0.00229904	20564/18590/18208/20563/20346/16410/22418/18187	8	No
TM1_BP_GO:0050920	TM1	BP	GO:0050920	regulation of chemotaxis	30/693	216/17051	3.89e-09	1.89e-07	1.33e-07	14268/21825/14456/20315/13616/18654/57266/21828/17242/11820/15945/20356/21983/20563/21803/14165/18787/11601/14172/20346/71660/18133/20312/18186/19252/22418/18595/16803/13617/17319	30	Yes
TM1_BP_GO:0050921	TM1	BP	GO:0050921	positive regulation of chemotaxis	24/693	143/17051	3.23e-09	1.64e-07	1.15e-07	14268/21825/14456/20315/13616/18654/57266/21828/17242/11820/15945/20356/21983/20563/21803/14165/18787/14172/71660/20312/18186/22418/16803/13617	24	Yes
TM1_BP_GO:0050922	TM1	BP	GO:0050922	negative regulation of chemotaxis	10/693	54/17051	5.46e-05	0.000737581	0.000518075	21825/20356/20563/11601/20346/18133/18186/19252/22418/17319	10	No
TM1_BP_GO:0051017	TM1	BP	GO:0051017	actin filament bundle assembly	22/693	166/17051	1.05e-06	2.47e-05	1.73e-05	17926/18708/14219/20971/21809/20194/16419/21336/102866/109711/20312/22240/18186/104027/22411/109624/14457/22027/11853/11856/77579/19219	22	Yes
TM1_BP_GO:0051047	TM1	BP	GO:0051047	positive regulation of secretion	29/693	352/17051	0.000258399	0.00260415	0.00182915	78896/20315/13616/12215/11826/15251/53322/21808/20971/21809/21803/11539/68151/54003/16854/21336/12394/12291/68581/14645/16000/192167/12934/14805/14389/17319/77579/19219/13057	29	Yes
TM1_BP_GO:0051146	TM1	BP	GO:0051146	striated muscle cell differentiation	27/693	301/17051	0.000105071	0.00124562	0.000874924	16011/20315/12558/232174/12845/15945/13052/13008/21803/218772/226101/24052/11548/18133/11472/16000/18807/74116/12527/11739/18595/12224/54720/13405/17387/77579/19091	27	No
TM1_BP_GO:0051216	TM1	BP	GO:0051216	cartilage development	38/693	182/17051	4.7e-17	2.56e-14	1.8e-14	21825/12111/12842/16007/20319/18933/13038/216616/17242/14219/15251/20204/15530/20289/21808/110075/12845/21803/218772/12167/16998/13601/12406/17132/14042/17313/12394/14172/17131/18121/73121/21834/18133/20682/21813/14683/22418/12628	38	Yes
TM1_BP_GO:0051271	TM1	BP	GO:0051271	negative regulation of cellular component movement	38/693	292/17051	2.24e-10	1.69e-08	1.19e-08	13179/20317/16011/21825/20315/11815/114886/20319/11819/13134/20377/13479/20563/21803/11539/18787/11601/109711/11857/13078/20346/18121/14114/12798/52662/18133/100952/20312/22240/22411/19252/12527/77125/21857/29876/17319/19219/19091	38	Yes
TM1_BP_GO:0051346	TM1	BP	GO:0051346	negative regulation of hydrolase activity	35/693	348/17051	7.92e-07	1.95e-05	1.37e-05	20317/21825/14456/13010/20319/21858/232345/11826/17756/12258/14734/12955/21808/235505/13479/11820/13601/12406/338367/18787/17872/68581/56334/16952/20568/16000/27494/74116/15370/21857/209378/13014/67866/15234/12505	35	Yes
TM1_BP_GO:0051384	TM1	BP	GO:0051384	response to glucocorticoid	10/693	71/17051	0.000565899	0.00484718	0.00340465	11670/11647/18708/11826/21803/12583/14573/16952/12192/22695	10	Yes
TM1_BP_GO:0051492	TM1	BP	GO:0051492	regulation of stress fiber assembly	13/693	95/17051	0.000119397	0.00138863	0.000975372	17926/18708/14219/20971/21809/20194/21336/18186/104027/22411/11853/11856/19219	13	No
TM1_BP_GO:0051496	TM1	BP	GO:0051496	positive regulation of stress fiber assembly	9/693	56/17051	0.000392579	0.00361497	0.00253915	17926/14219/20971/21809/20194/21336/18186/22411/11853	9	Yes
TM1_BP_GO:0051893	TM1	BP	GO:0051893	regulation of focal adhesion assembly	11/693	62/17051	3.54e-05	0.000515288	0.000361937	11815/107581/17926/13640/14758/20971/20194/18186/11856/244895/17387	11	Yes
TM1_BP_GO:0051897	TM1	BP	GO:0051897	positive regulation of protein kinase B signaling	14/693	114/17051	0.000214598	0.00224096	0.00157404	16011/21825/14456/20315/17926/12654/15200/20356/18590/21983/21803/20312/16000/11600	14	Yes
TM1_BP_GO:0051924	TM1	BP	GO:0051924	regulation of calcium ion transport	23/693	270/17051	0.000688495	0.00572735	0.00402288	20315/11931/21808/15945/11421/21803/319984/19122/16854/18787/12291/12288/213573/20312/19218/16000/12293/18578/98660/13167/13617/13405/13057	23	No
TM1_BP_GO:0051962	TM1	BP	GO:0051962	positive regulation of nervous system development	30/693	330/17051	3.45e-05	0.000506416	0.000355705	14268/20317/20315/68792/64085/13640/21826/18708/17242/319387/15251/18039/20356/21983/11421/18208/24136/21803/18121/20482/20312/18186/27279/16000/192167/77125/399558/18845/331461/22352	30	No
TM1_BP_GO:0051963	TM1	BP	GO:0051963	regulation of synapse assembly	16/693	117/17051	2.05e-05	0.000322128	0.000226262	68792/64085/13640/21826/18708/14735/14362/319387/11820/21983/18208/192167/22418/399558/331461/320840	16	No
TM1_BP_GO:0051965	TM1	BP	GO:0051965	positive regulation of synapse assembly	10/693	77/17051	0.00108107	0.00817549	0.00574245	68792/64085/13640/21826/18708/319387/21983/192167/399558/331461	10	No
TM1_BP_GO:0052547	TM1	BP	GO:0052547	regulation of peptidase activity	36/693	364/17051	8.25e-07	2e-05	1.41e-05	20317/21825/14456/13010/16007/13036/20319/21858/232345/11826/12258/14734/14219/12955/235505/13479/52377/11820/13601/12406/18787/68581/12828/215114/20568/16000/74116/13033/16913/15370/21857/209378/13014/67866/15234/12505	36	Yes
TM1_BP_GO:0055008	TM1	BP	GO:0055008	cardiac muscle tissue morphogenesis	9/693	64/17051	0.00106949	0.00810037	0.00568969	21808/22762/21803/17131/18121/11600/22418/17300/77446	9	No
TM1_BP_GO:0055017	TM1	BP	GO:0055017	cardiac muscle tissue growth	13/693	103/17051	0.000272087	0.00271976	0.00191035	21808/13052/22762/16526/18121/11548/21813/16000/74116/11739/17300/77446/19091	13	No
TM1_BP_GO:0055074	TM1	BP	GO:0055074	calcium ion homeostasis	34/693	465/17051	0.000717147	0.00586626	0.00412045	13616/11931/53322/21808/11820/15945/21803/24052/19122/21336/12291/12288/20192/15212/11548/21817/20312/16410/19218/104027/14825/14683/22418/12293/18595/278279/98660/13167/13617/94249/13405/19219/19091/13057	34	No
TM1_BP_GO:0055078	TM1	BP	GO:0055078	sodium ion homeostasis	9/693	55/17051	0.00034161	0.00323672	0.00227347	11931/11421/11539/14042/21336/14043/14683/98660/19219	9	Yes
TM1_BP_GO:0055117	TM1	BP	GO:0055117	regulation of cardiac muscle contraction	10/693	62/17051	0.000182934	0.00197328	0.00138602	11931/242202/14219/11539/12288/17131/11548/18578/98660/13405	10	No
TM1_BP_GO:0055123	TM1	BP	GO:0055123	digestive system development	17/693	122/17051	8.82e-06	0.000154606	0.000108595	20319/20377/15251/18590/218772/54635/68151/14042/14165/14238/71660/16000/22418/18552/18595/12224/19378	17	Yes
TM1_BP_GO:0060021	TM1	BP	GO:0060021	roof of mouth development	14/693	96/17051	3.22e-05	0.000478526	0.000336116	18933/14362/21808/21809/30953/14451/14238/21813/22411/231070/22418/231470/18595/20148	14	No
TM1_BP_GO:0060041	TM1	BP	GO:0060041	retina development in camera-type eye	18/693	161/17051	9.85e-05	0.00117626	0.000826203	12215/15251/21808/218772/12167/80837/330222/27419/13078/21834/23928/20682/18186/16779/18595/12628/29876/77579	18	No
TM1_BP_GO:0060047	TM1	BP	GO:0060047	heart contraction	24/693	213/17051	6.34e-06	0.000117353	8.24e-05	13616/11931/18708/242202/14219/15200/21808/13052/11421/24052/11539/14042/12291/14043/12288/17131/20346/11548/21834/12293/18578/98660/13405/19091	24	Yes
TM1_BP_GO:0060070	TM1	BP	GO:0060070	canonical Wnt signaling pathway	30/693	280/17051	1.32e-06	3.04e-05	2.14e-05	12842/20319/67916/12558/20377/14734/14362/17242/11820/72293/20356/21803/68151/14042/14165/207181/18121/20682/69217/233328/56811/18647/13653/22411/22418/72780/68588/21885/68010/83675	30	Yes
TM1_BP_GO:0060071	TM1	BP	GO:0060071	Wnt signaling pathway, planar cell polarity pathway	8/693	36/17051	7.87e-05	0.000976977	0.000686226	20319/20377/14734/14362/69217/22411/22418/68588	8	Yes
TM1_BP_GO:0060073	TM1	BP	GO:0060073	micturition	4/693	12/17051	0.00103106	0.00785781	0.00551931	21336/12288/19218/16531	4	No
TM1_BP_GO:0060173	TM1	BP	GO:0060173	limb development	27/693	178/17051	3.38e-09	1.66e-07	1.17e-07	20319/11819/18933/232174/14734/20204/20289/21808/12845/14451/218772/12167/22160/14042/14165/12288/242022/18121/20682/110350/14683/22418/18552/231470/18845/19378/230857	27	Yes
TM1_BP_GO:0060317	TM1	BP	GO:0060317	cardiac epithelial to mesenchymal transition	6/693	30/17051	0.00113545	0.00848218	0.00595786	13876/67888/21808/22160/18121/21813	6	No
TM1_BP_GO:0060323	TM1	BP	GO:0060323	head morphogenesis	10/693	45/17051	1.01e-05	0.000174832	0.000122801	12842/17390/20289/21808/21809/30953/21803/18121/18595/78892	10	Yes
TM1_BP_GO:0060324	TM1	BP	GO:0060324	face development	12/693	60/17051	4.3e-06	8.38e-05	5.89e-05	12842/17390/20289/21808/21809/30953/21803/18121/22418/18595/19378/78892	12	Yes
TM1_BP_GO:0060325	TM1	BP	GO:0060325	face morphogenesis	10/693	40/17051	3.23e-06	6.61e-05	4.64e-05	12842/17390/20289/21808/21809/30953/21803/18121/18595/78892	10	Yes
TM1_BP_GO:0060326	TM1	BP	GO:0060326	cell chemotaxis	39/693	285/17051	2.79e-11	2.58e-09	1.82e-09	21825/14456/20315/13616/18654/57266/12215/19035/21828/17242/15200/13479/11820/15945/20356/13052/21983/20563/16854/18787/238130/14172/71660/18133/16952/20312/18186/14825/19252/22418/18595/18578/15370/12642/16803/13617/15234/17319/66102	39	Yes
TM1_BP_GO:0060343	TM1	BP	GO:0060343	trabecula formation	6/693	25/17051	0.000402615	0.00368663	0.00258948	12842/20377/17390/215798/12643/11504	6	Yes
TM1_BP_GO:0060346	TM1	BP	GO:0060346	bone trabecula formation	4/693	11/17051	0.000710111	0.00582814	0.00409367	12842/20377/17390/12643	4	No
TM1_BP_GO:0060348	TM1	BP	GO:0060348	bone development	39/693	218/17051	4.33e-15	1.06e-12	7.47e-13	20692/21825/12111/12842/17926/20319/11647/19035/232174/15530/20289/12845/12643/18590/27973/218772/12167/16998/22160/12406/54635/14042/102866/14043/14172/73121/20682/233328/21813/231070/16000/14683/12306/12628/17300/20148/14118/17387/19219	39	Yes
TM1_BP_GO:0060349	TM1	BP	GO:0060349	bone morphogenesis	22/693	93/17051	1.43e-11	1.5e-09	1.05e-09	21825/12842/20319/11647/232174/15530/20289/12845/218772/16998/22160/12406/14042/14043/14172/20682/21813/231070/14683/17300/20148/17387	22	Yes
TM1_BP_GO:0060350	TM1	BP	GO:0060350	endochondral bone morphogenesis	16/693	56/17051	4.26e-10	3.08e-08	2.16e-08	21825/12842/11647/15530/20289/12845/218772/12406/14042/14043/14172/20682/21813/14683/17300/17387	16	Yes
TM1_BP_GO:0060351	TM1	BP	GO:0060351	cartilage development involved in endochondral bone morphogenesis	9/693	33/17051	4.61e-06	8.87e-05	6.23e-05	21825/12842/15530/12845/218772/12406/14042/20682/21813	9	Yes
TM1_BP_GO:0060389	TM1	BP	GO:0060389	pathway-restricted SMAD protein phosphorylation	12/693	60/17051	4.3e-06	8.38e-05	5.89e-05	73230/21808/110075/21809/65112/21803/17131/18121/52662/100952/21813/19663	12	No
TM1_BP_GO:0060393	TM1	BP	GO:0060393	regulation of pathway-restricted SMAD protein phosphorylation	11/693	57/17051	1.54e-05	0.000249407	0.000175183	73230/21808/110075/21809/65112/21803/17131/18121/52662/100952/19663	11	No
TM1_BP_GO:0060394	TM1	BP	GO:0060394	negative regulation of pathway-restricted SMAD protein phosphorylation	5/693	13/17051	0.000107154	0.00126421	0.000887976	65112/17131/18121/52662/100952	5	No
TM1_BP_GO:0060395	TM1	BP	GO:0060395	SMAD protein signal transduction	12/693	82/17051	0.000112595	0.00131889	0.000926386	15211/21808/14281/110075/21809/21803/20742/17131/16476/18133/22352/19663	12	Yes
TM1_BP_GO:0060411	TM1	BP	GO:0060411	cardiac septum morphogenesis	15/693	78/17051	4.73e-07	1.22e-05	8.53e-06	16007/20564/14362/21808/22762/20563/218772/17131/18121/18186/21813/22411/22418/18187/20148	15	Yes
TM1_BP_GO:0060412	TM1	BP	GO:0060412	ventricular septum morphogenesis	10/693	44/17051	8.16e-06	0.000144544	0.000101528	20564/14362/21808/22762/20563/17131/18121/21813/22411/22418	10	Yes
TM1_BP_GO:0060415	TM1	BP	GO:0060415	muscle tissue morphogenesis	10/693	73/17051	0.000708063	0.00582814	0.00409367	14362/21808/22762/21803/17131/18121/11600/22418/17300/77446	10	No
TM1_BP_GO:0060419	TM1	BP	GO:0060419	heart growth	13/693	112/17051	0.000618707	0.00523554	0.00367743	21808/13052/22762/16526/18121/11548/21813/16000/74116/11739/17300/77446/19091	13	No
TM1_BP_GO:0060425	TM1	BP	GO:0060425	lung morphogenesis	11/693	65/17051	5.58e-05	0.000747156	0.000524801	13036/14042/14165/18121/20682/21813/16000/64138/18595/21923/114142	11	No
TM1_BP_GO:0060428	TM1	BP	GO:0060428	lung epithelium development	8/693	48/17051	0.000638782	0.00534096	0.00375148	52377/74155/14165/21834/20682/16000/114142/16598	8	No
TM1_BP_GO:0060441	TM1	BP	GO:0060441	epithelial tube branching involved in lung morphogenesis	7/693	34/17051	0.000366165	0.00341661	0.00239982	13036/14042/14165/20682/64138/18595/21923	7	No
TM1_BP_GO:0060445	TM1	BP	GO:0060445	branching involved in salivary gland morphogenesis	7/693	27/17051	7.74e-05	0.000974384	0.000684405	18590/57764/14165/20346/21817/18186/15234	7	No
TM1_BP_GO:0060485	TM1	BP	GO:0060485	mesenchyme development	39/693	272/17051	6.49e-12	7.41e-10	5.21e-10	14268/21825/12842/13616/17311/20319/12558/20377/13876/67888/17242/15251/20289/21808/21809/20356/24136/21803/22160/14042/14165/17131/20346/14573/18121/52662/20682/18186/21813/246154/22411/22418/12192/17300/19378/68010/13617/18187/13082	39	Yes
TM1_BP_GO:0060512	TM1	BP	GO:0060512	prostate gland morphogenesis	10/693	29/17051	1.15e-07	3.7e-06	2.6e-06	20377/17390/14165/18121/20682/16000/22418/21923/11835/12505	10	No
TM1_BP_GO:0060537	TM1	BP	GO:0060537	muscle tissue development	45/693	431/17051	6.67e-09	3.03e-07	2.13e-07	16011/11819/56312/14733/232174/15530/20289/21808/14281/13052/22762/30953/13008/21803/218772/24052/22160/16526/17131/18121/11548/20482/20682/11472/21813/13653/16000/11600/74116/22418/11739/18595/217082/12224/15370/114142/14605/54720/17300/19378/11910/13405/77446/77579/19091	45	Yes
TM1_BP_GO:0060538	TM1	BP	GO:0060538	skeletal muscle organ development	19/693	181/17051	0.000148311	0.00166952	0.00117267	11819/56312/14733/232174/20289/14281/21803/22160/20482/13653/217082/12224/15370/114142/14605/54720/11910/12804/13405	19	Yes
TM1_BP_GO:0060541	TM1	BP	GO:0060541	respiratory system development	33/693	238/17051	6.75e-10	4.67e-08	3.28e-08	20692/16011/13036/12654/14734/14219/52377/21809/319939/18590/11421/22762/21803/74155/16998/14042/14165/17313/14172/18121/21834/20682/21813/16000/64138/22418/18595/21923/114142/16598/19378/77446/17387	33	Yes
TM1_BP_GO:0060560	TM1	BP	GO:0060560	developmental growth involved in morphogenesis	28/693	263/17051	3.35e-06	6.78e-05	4.76e-05	14268/20315/20564/20319/13640/20377/50706/17756/11820/20356/18208/24136/20563/21803/14042/14165/20346/20682/18186/21813/27279/22411/22418/12934/16779/13175/21923/18187	28	Yes
TM1_BP_GO:0060562	TM1	BP	GO:0060562	epithelial tube morphogenesis	44/693	371/17051	1.81e-10	1.39e-08	9.75e-09	20315/13036/20319/18654/12215/20377/14734/14362/17242/15251/21808/20971/15945/20356/18208/24136/20563/21803/22160/14042/14165/17313/14573/18121/56334/20682/18186/21813/16000/11600/94275/13800/64138/22418/23908/68588/18595/21923/11835/19378/29876/13617/17387/12505	44	Yes
TM1_BP_GO:0060601	TM1	BP	GO:0060601	lateral sprouting from an epithelium	4/693	12/17051	0.00103106	0.00785781	0.00551931	14165/18121/22418/11835	4	No
TM1_BP_GO:0060602	TM1	BP	GO:0060602	branch elongation of an epithelium	5/693	19/17051	0.00079016	0.00633677	0.00445093	21803/14165/20682/22418/21923	5	No
TM1_BP_GO:0060606	TM1	BP	GO:0060606	tube closure	14/693	111/17051	0.000161388	0.0017563	0.00123362	20319/20377/14362/21808/20971/24136/21803/22160/14165/18121/56334/13800/22418/68588	14	No
TM1_BP_GO:0060675	TM1	BP	GO:0060675	ureteric bud morphogenesis	9/693	64/17051	0.00106949	0.00810037	0.00568969	18654/14734/21803/14573/18121/20682/94275/23908/12505	9	No
TM1_BP_GO:0060688	TM1	BP	GO:0060688	regulation of morphogenesis of a branching structure	15/693	62/17051	1.84e-08	7.48e-07	5.25e-07	18654/20377/17242/18590/21803/57764/14165/14573/18121/20682/94275/22418/18595/11835/15234	15	Yes
TM1_BP_GO:0060693	TM1	BP	GO:0060693	regulation of branching involved in salivary gland morphogenesis	4/693	11/17051	0.000710111	0.00582814	0.00409367	18590/57764/14165/15234	4	No
TM1_BP_GO:0060740	TM1	BP	GO:0060740	prostate gland epithelium morphogenesis	10/693	28/17051	7.78e-08	2.65e-06	1.86e-06	20377/17390/14165/18121/20682/16000/22418/21923/11835/12505	10	No
TM1_BP_GO:0060828	TM1	BP	GO:0060828	regulation of canonical Wnt signaling pathway	28/693	234/17051	3.2e-07	9.02e-06	6.33e-06	12842/20319/12558/20377/14734/14362/17242/11820/72293/20356/21803/68151/14165/207181/18121/20682/69217/233328/56811/18647/13653/22411/22418/72780/68588/21885/68010/83675	28	Yes
TM1_BP_GO:0060840	TM1	BP	GO:0060840	artery development	15/693	100/17051	1.2e-05	0.000202641	0.000142335	18933/17242/20204/21808/12845/16835/17131/18121/14230/18186/22411/17300/15446/77579/19219	15	Yes
TM1_BP_GO:0060976	TM1	BP	GO:0060976	coronary vasculature development	10/693	73/17051	0.000708063	0.00582814	0.00409367	14734/11421/22762/24052/110350/18186/11600/18552/12224/77579	10	No
TM1_BP_GO:0060993	TM1	BP	GO:0060993	kidney morphogenesis	11/693	92/17051	0.00124362	0.00916471	0.00643727	18654/14734/21803/14165/14573/18121/20682/94275/231470/23908/12505	11	No
TM1_BP_GO:0061035	TM1	BP	GO:0061035	regulation of cartilage development	18/693	64/17051	4.59e-11	3.95e-09	2.78e-09	16007/13038/216616/17242/14219/20289/21808/21803/218772/16998/17132/14172/17131/18121/73121/21834/20682/22418	18	Yes
TM1_BP_GO:0061036	TM1	BP	GO:0061036	positive regulation of cartilage development	8/693	27/17051	7.99e-06	0.000142524	0.000100108	16007/17242/20289/14172/17131/21834/20682/22418	8	No
TM1_BP_GO:0061037	TM1	BP	GO:0061037	negative regulation of cartilage development	8/693	28/17051	1.08e-05	0.000183188	0.000128671	13038/216616/21808/218772/16998/18121/73121/20682	8	Yes
TM1_BP_GO:0061041	TM1	BP	GO:0061041	regulation of wound healing	17/693	118/17051	5.58e-06	0.000105013	7.38e-05	21825/67916/12258/15200/235505/18590/27973/18787/16952/19218/27279/12527/12306/18595/67866/19219/19091	17	Yes
TM1_BP_GO:0061045	TM1	BP	GO:0061045	negative regulation of wound healing	11/693	66/17051	6.45e-05	0.000839894	0.000589939	21825/12258/235505/18590/18787/19218/12527/12306/18595/67866/19091	11	Yes
TM1_BP_GO:0061053	TM1	BP	GO:0061053	somite development	13/693	86/17051	4.16e-05	0.00059392	0.000417168	68713/20319/20377/20289/24136/19363/18121/56334/22411/22418/18845/17300/19378	13	No
TM1_BP_GO:0061082	TM1	BP	GO:0061082	myeloid leukocyte cytokine production	7/693	31/17051	0.000198994	0.00211399	0.00148486	14456/21808/21809/21803/22418/12053/17319	7	Yes
TM1_BP_GO:0061097	TM1	BP	GO:0061097	regulation of protein tyrosine kinase activity	10/693	76/17051	0.000975448	0.00755126	0.00530399	14456/15200/11820/11421/18003/74155/11539/19122/11804/15505	10	No
TM1_BP_GO:0061098	TM1	BP	GO:0061098	positive regulation of protein tyrosine kinase activity	8/693	46/17051	0.000474414	0.00419536	0.00294681	14456/15200/11820/11421/18003/11539/19122/15505	8	No
TM1_BP_GO:0061138	TM1	BP	GO:0061138	morphogenesis of a branching epithelium	36/693	210/17051	1.92e-13	3.93e-11	2.76e-11	20315/13036/20319/18654/20377/14734/17242/20356/18590/20563/21803/57764/14042/14165/17313/20346/14573/18121/21817/20682/18186/21813/16000/11600/94275/64138/22418/72780/18595/21923/11835/29876/13617/15234/17387/12505	36	Yes
TM1_BP_GO:0061298	TM1	BP	GO:0061298	retina vasculature development in camera-type eye	6/693	19/17051	7.6e-05	0.000961125	0.000675092	15251/80837/13078/18186/18595/29876	6	No
TM1_BP_GO:0061299	TM1	BP	GO:0061299	retina vasculature morphogenesis in camera-type eye	4/693	11/17051	0.000710111	0.00582814	0.00409367	80837/13078/18186/29876	4	No
TM1_BP_GO:0061383	TM1	BP	GO:0061383	trabecula morphogenesis	9/693	50/17051	0.000161302	0.0017563	0.00123362	12842/20377/17390/215798/21808/12643/11504/18121/77446	9	Yes
TM1_BP_GO:0061437	TM1	BP	GO:0061437	renal system vasculature development	6/693	27/17051	0.000627899	0.00526791	0.00370017	11826/11601/18186/13653/11600/18595	6	No
TM1_BP_GO:0061440	TM1	BP	GO:0061440	kidney vasculature development	6/693	27/17051	0.000627899	0.00526791	0.00370017	11826/11601/18186/13653/11600/18595	6	No
TM1_BP_GO:0061448	TM1	BP	GO:0061448	connective tissue development	45/693	253/17051	4.02e-17	2.47e-14	1.73e-14	21825/12111/12842/16007/20319/18933/13038/216616/17242/14219/15251/20204/15530/20289/21808/110075/12845/21803/218772/108012/12167/16998/13601/12406/17132/14042/17313/12394/22187/14172/17131/114679/18121/73121/21834/18133/20682/12831/21813/13653/16000/14683/22418/12628/105171	45	Yes
TM1_BP_GO:0061458	TM1	BP	GO:0061458	reproductive system development	46/693	430/17051	2.08e-09	1.2e-07	8.45e-08	56213/20317/16007/17311/20319/19223/11819/56312/53381/16157/14313/20377/17390/15081/15251/21808/22762/30953/12167/13039/16477/14165/12394/18787/22187/11504/14238/20346/18121/56334/20682/16952/16410/12608/16000/11600/22418/72780/12192/18595/21923/17300/11835/27206/19219/12505	46	Yes
TM1_BP_GO:0061564	TM1	BP	GO:0061564	axon development	49/693	488/17051	5.11e-09	2.41e-07	1.69e-07	14268/13723/20315/20564/11658/23964/13640/12215/12558/17390/17756/18040/21808/11820/18039/20356/18208/24136/20563/12386/14451/12167/11735/13848/14042/11787/16476/20346/14573/18121/20482/12552/80883/18186/27279/13800/22418/12934/16779/399558/18845/13175/21923/16773/14009/22352/18187/17319/77579	49	Yes
TM1_BP_GO:0061572	TM1	BP	GO:0061572	actin filament bundle organization	23/693	169/17051	3.7e-07	9.86e-06	6.92e-06	17926/18708/14219/20971/21809/20194/16419/21336/102866/109711/73121/20312/22240/18186/104027/22411/109624/14457/22027/11853/11856/77579/19219	23	Yes
TM1_BP_GO:0061614	TM1	BP	GO:0061614	pri-miRNA transcription by RNA polymerase II	9/693	57/17051	0.00044965	0.00404405	0.00284053	15251/21808/14281/11820/21803/16476/20682/13653/12224	9	No
TM1_BP_GO:0062009	TM1	BP	GO:0062009	secondary palate development	6/693	25/17051	0.000402615	0.00368663	0.00258948	14362/21808/21809/21813/22411/22418	6	No
TM1_BP_GO:0070167	TM1	BP	GO:0070167	regulation of biomineral tissue development	20/693	92/17051	6.14e-10	4.31e-08	3.02e-08	14456/16007/14758/27047/15251/12845/100038882/21803/12167/16998/22160/13601/17313/11732/66695/73121/20682/12608/381629/18605	20	Yes
TM1_BP_GO:0070168	TM1	BP	GO:0070168	negative regulation of biomineral tissue development	9/693	24/17051	2.17e-07	6.38e-06	4.48e-06	14456/15251/21803/16998/13601/66695/73121/20682/18605	9	Yes
TM1_BP_GO:0070371	TM1	BP	GO:0070371	ERK1 and ERK2 cascade	36/693	317/17051	2.63e-08	1e-06	7.04e-07	14268/14456/20315/16007/13036/12654/73230/14219/11820/18590/21983/21803/74155/54635/14165/14172/16476/14114/20682/100952/20312/16410/18186/16000/11600/19252/12192/83397/18595/11910/13617/230857/13405/17319/19219/12505	36	Yes
TM1_BP_GO:0070372	TM1	BP	GO:0070372	regulation of ERK1 and ERK2 cascade	31/693	298/17051	1.66e-06	3.65e-05	2.56e-05	14268/14456/20315/16007/12654/73230/14219/11820/18590/21983/21803/74155/54635/14165/14172/16476/14114/100952/20312/18186/16000/11600/19252/83397/18595/11910/13617/230857/13405/17319/12505	31	Yes
TM1_BP_GO:0070374	TM1	BP	GO:0070374	positive regulation of ERK1 and ERK2 cascade	21/693	205/17051	9.64e-05	0.00116548	0.000818633	14456/20315/12654/73230/14219/11820/18590/21983/21803/54635/14165/14172/16476/20312/18186/11600/83397/18595/13617/17319/12505	21	Yes
TM1_BP_GO:0070482	TM1	BP	GO:0070482	response to oxygen levels	23/693	221/17051	3.56e-05	0.000516238	0.000362605	67749/11670/19223/18654/11931/20657/17390/11826/15251/12955/21808/21809/11539/22160/16526/13653/246154/68655/12192/22027/16531/13617/230857	23	Yes
TM1_BP_GO:0070527	TM1	BP	GO:0070527	platelet aggregation	8/693	46/17051	0.000474414	0.00419536	0.00294681	14268/12845/19218/14683/12527/18595/12628/19091	8	No
TM1_BP_GO:0070997	TM1	BP	GO:0070997	neuron death	32/693	413/17051	0.000380556	0.0035241	0.00247532	20317/12759/14362/17242/15251/21808/14281/11820/21809/18039/231637/11539/19122/22187/16476/14573/12931/21834/20312/19063/12608/18186/13653/16000/66208/11600/64138/15505/22418/17748/16531/12804	32	Yes
TM1_BP_GO:0071216	TM1	BP	GO:0071216	cellular response to biotic stimulus	18/693	196/17051	0.00109045	0.00823373	0.00578336	15945/21803/18787/109815/20312/12608/14825/22418/14469/18578/12628/22352/16803/18035/17319/22695/22038/66102	18	No
TM1_BP_GO:0071219	TM1	BP	GO:0071219	cellular response to molecule of bacterial origin	18/693	173/17051	0.00024522	0.00249953	0.00175566	15945/21803/18787/109815/20312/12608/14825/22418/14469/18578/12628/22352/16803/18035/17319/22695/22038/66102	18	No
TM1_BP_GO:0071222	TM1	BP	GO:0071222	cellular response to lipopolysaccharide	17/693	164/17051	0.000377345	0.00350096	0.00245907	15945/21803/18787/109815/20312/12608/14825/14469/18578/12628/22352/16803/18035/17319/22695/22038/66102	17	No
TM1_BP_GO:0071229	TM1	BP	GO:0071229	cellular response to acid chemical	13/693	78/17051	1.42e-05	0.000231787	0.000162807	12843/12842/107581/17392/17390/12833/20194/54635/12832/12608/12306/18595/16598	13	Yes
TM1_BP_GO:0071230	TM1	BP	GO:0071230	cellular response to amino acid stimulus	10/693	66/17051	0.000310222	0.00302097	0.00212192	12843/12842/107581/17392/17390/12833/54635/12832/12608/18595	10	Yes
TM1_BP_GO:0071260	TM1	BP	GO:0071260	cellular response to mechanical stimulus	10/693	32/17051	3.3e-07	9.1e-06	6.39e-06	12842/11826/20289/667742/12798/20682/22411/98660/13617/19219	10	Yes
TM1_BP_GO:0071396	TM1	BP	GO:0071396	cellular response to lipid	39/693	431/17051	2.66e-06	5.48e-05	3.85e-05	12759/67749/13640/20377/17390/232174/11826/11820/15945/21803/14827/18787/109815/16835/14573/20682/16952/20312/19218/12608/14825/231070/16000/14469/12192/18578/12628/11835/98660/22352/19378/56615/16803/18035/17319/13082/22695/22038/66102	39	Yes
TM1_BP_GO:0071417	TM1	BP	GO:0071417	cellular response to organonitrogen compound	36/693	496/17051	0.000579411	0.00495427	0.00347987	12843/16011/67749/12842/107581/18708/17392/20377/17390/12833/11826/53322/11820/231637/20563/54635/19122/12832/71660/20682/11472/12608/13653/16362/231070/16000/14683/12293/12192/18595/22027/18578/15370/22352/432442/18605	36	Yes
TM1_BP_GO:0071559	TM1	BP	GO:0071559	response to transforming growth factor beta	34/693	212/17051	6.35e-12	7.41e-10	5.21e-10	12843/56213/21825/11906/20289/21808/235505/14281/21809/68939/65112/21803/12167/16998/16419/12394/18787/66695/17131/16476/14573/52662/20482/12827/20682/100952/80707/21813/246154/108075/12192/68010/15446/14118	34	Yes
TM1_BP_GO:0071560	TM1	BP	GO:0071560	cellular response to transforming growth factor beta stimulus	33/693	208/17051	1.76e-11	1.76e-09	1.24e-09	12843/56213/21825/20289/21808/235505/14281/21809/68939/65112/21803/12167/16998/16419/12394/18787/66695/17131/16476/14573/52662/20482/12827/20682/100952/80707/21813/246154/108075/12192/68010/15446/14118	33	Yes
TM1_BP_GO:0071604	TM1	BP	GO:0071604	transforming growth factor beta production	10/693	41/17051	4.12e-06	8.15e-05	5.72e-05	14268/21825/17022/15251/21808/16998/14114/20312/16410/22411	10	Yes
TM1_BP_GO:0071621	TM1	BP	GO:0071621	granulocyte chemotaxis	18/693	120/17051	1.64e-06	3.63e-05	2.55e-05	21825/13616/12215/19035/21828/17242/13479/15945/13052/20563/16854/71660/16952/20312/14825/18578/16803/13617	18	Yes
TM1_BP_GO:0071634	TM1	BP	GO:0071634	regulation of transforming growth factor beta production	9/693	39/17051	2.03e-05	0.000321019	0.000225483	14268/21825/17022/15251/21808/14114/20312/16410/22411	9	Yes
TM1_BP_GO:0071674	TM1	BP	GO:0071674	mononuclear cell migration	23/693	164/17051	2.13e-07	6.31e-06	4.43e-06	21825/14456/20315/11815/57266/17242/11820/15945/20563/21803/13601/67374/14042/16854/18787/71660/18133/16952/20312/19252/22418/12642/66102	23	Yes
TM1_BP_GO:0071675	TM1	BP	GO:0071675	regulation of mononuclear cell migration	19/693	108/17051	6.44e-08	2.22e-06	1.56e-06	21825/14456/20315/11815/57266/17242/11820/15945/20563/21803/13601/67374/16854/18787/71660/18133/20312/19252/22418	19	Yes
TM1_BP_GO:0071677	TM1	BP	GO:0071677	positive regulation of mononuclear cell migration	10/693	64/17051	0.000239576	0.00246507	0.00173146	14456/20315/57266/11820/15945/21803/67374/16854/18787/22418	10	Yes
TM1_BP_GO:0071706	TM1	BP	GO:0071706	tumor necrosis factor superfamily cytokine production	19/693	173/17051	8.11e-05	0.00100052	0.000702762	12759/21825/14456/18708/11820/74155/22160/109815/20312/16000/11600/22418/77125/83397/16803/17319/22695/19219/13057	19	Yes
TM1_BP_GO:0071709	TM1	BP	GO:0071709	membrane assembly	7/693	36/17051	0.000529488	0.00458329	0.00321929	12558/20194/11735/20742/192167/12306/331461	7	No
TM1_BP_GO:0071711	TM1	BP	GO:0071711	basement membrane organization	6/693	30/17051	0.00113545	0.00848218	0.00595786	54409/57764/14042/80883/16779/399558	6	Yes
TM1_BP_GO:0071772	TM1	BP	GO:0071772	response to BMP	24/693	157/17051	2.15e-08	8.46e-07	5.94e-07	56213/16007/20319/14313/73230/20377/67888/14734/14362/20289/21808/12845/21809/21803/12167/14042/17131/18121/20482/50766/13653/22418/68010/14118	24	Yes
TM1_BP_GO:0071773	TM1	BP	GO:0071773	cellular response to BMP stimulus	24/693	157/17051	2.15e-08	8.46e-07	5.94e-07	56213/16007/20319/14313/73230/20377/67888/14734/14362/20289/21808/12845/21809/21803/12167/14042/17131/18121/20482/50766/13653/22418/68010/14118	24	Yes
TM1_BP_GO:0071774	TM1	BP	GO:0071774	response to fibroblast growth factor	17/693	90/17051	1.08e-07	3.53e-06	2.48e-06	21825/14733/20377/14219/14042/14165/14043/14172/26427/18121/22418/399558/12192/15370/15936/22695/12505	17	Yes
TM1_BP_GO:0072001	TM1	BP	GO:0072001	renal system development	48/693	312/17051	1.38e-15	4.24e-13	2.98e-13	18993/18654/73230/20377/11826/14734/12829/18027/21808/18590/11421/20563/30953/21803/218772/14042/14165/11601/70350/12828/74055/11504/242022/17131/14573/18121/12931/20682/110350/18186/13653/22411/11600/71602/94275/22418/18552/16779/231470/23908/18595/12628/17300/19378/13617/14118/83675/12505	48	Yes
TM1_BP_GO:0072006	TM1	BP	GO:0072006	nephron development	24/693	142/17051	2.79e-09	1.45e-07	1.02e-07	18993/18654/11826/14734/12829/21803/14042/11601/70350/12828/74055/14573/18121/20682/13653/11600/71602/94275/16779/23908/18595/12628/17300/12505	24	Yes
TM1_BP_GO:0072009	TM1	BP	GO:0072009	nephron epithelium development	16/693	102/17051	3.4e-06	6.81e-05	4.78e-05	18993/18654/11826/14734/21803/14042/70350/14573/18121/20682/71602/94275/16779/23908/17300/12505	16	Yes
TM1_BP_GO:0072010	TM1	BP	GO:0072010	glomerular epithelium development	5/693	17/17051	0.000449888	0.00404405	0.00284053	14042/70350/71602/16779/17300	5	Yes
TM1_BP_GO:0072073	TM1	BP	GO:0072073	kidney epithelium development	22/693	136/17051	2.92e-08	1.1e-06	7.74e-07	18993/18654/73230/20377/11826/14734/20563/21803/218772/14042/70350/17131/14573/18121/12931/20682/71602/94275/16779/23908/17300/12505	22	Yes
TM1_BP_GO:0072080	TM1	BP	GO:0072080	nephron tubule development	11/693	89/17051	0.000942834	0.00734513	0.0051592	18993/18654/11826/14734/21803/14573/18121/20682/94275/23908/12505	11	No
TM1_BP_GO:0072132	TM1	BP	GO:0072132	mesenchyme morphogenesis	9/693	49/17051	0.000137148	0.00155816	0.00109445	67888/21808/22160/18121/20682/21813/22411/22418/17300	9	No
TM1_BP_GO:0072163	TM1	BP	GO:0072163	mesonephric epithelium development	16/693	96/17051	1.49e-06	3.34e-05	2.34e-05	18654/73230/20377/14734/20563/21803/218772/17131/14573/18121/12931/20682/94275/23908/17300/12505	16	Yes
TM1_BP_GO:0072164	TM1	BP	GO:0072164	mesonephric tubule development	16/693	96/17051	1.49e-06	3.34e-05	2.34e-05	18654/73230/20377/14734/20563/21803/218772/17131/14573/18121/12931/20682/94275/23908/17300/12505	16	Yes
TM1_BP_GO:0072171	TM1	BP	GO:0072171	mesonephric tubule morphogenesis	9/693	65/17051	0.0011975	0.00889154	0.0062454	18654/14734/21803/14573/18121/20682/94275/23908/12505	9	No
TM1_BP_GO:0072175	TM1	BP	GO:0072175	epithelial tube formation	18/693	159/17051	8.37e-05	0.00103005	0.000723507	20319/20377/14362/15251/21808/20971/24136/21803/22160/14165/14573/18121/56334/20682/13800/22418/23908/68588	18	Yes
TM1_BP_GO:0072507	TM1	BP	GO:0072507	divalent inorganic cation homeostasis	37/693	499/17051	0.00032529	0.00314276	0.00220747	13616/11931/53322/21808/11820/15945/21803/24052/11735/19122/21336/12291/12288/20192/69048/15212/11548/21817/20312/16410/19218/104027/14825/14683/22418/12293/17748/18595/278279/98660/13167/13617/94249/13405/19219/19091/13057	37	No
TM1_BP_GO:0072593	TM1	BP	GO:0072593	reactive oxygen species metabolic process	25/693	277/17051	0.000170123	0.00184318	0.00129465	12759/21825/23876/16007/19223/53381/17392/20657/14219/15251/12955/11820/21803/109815/11758/13078/14778/21813/14825/16000/18477/15937/16598/19219/13057	25	Yes
TM1_BP_GO:0072676	TM1	BP	GO:0072676	lymphocyte migration	13/693	100/17051	0.000202034	0.00212495	0.00149256	14456/20315/11815/57266/11820/15945/13601/67374/14042/20312/22418/12642/66102	13	Yes
TM1_BP_GO:0085029	TM1	BP	GO:0085029	extracellular matrix assembly	16/693	41/17051	1.87e-12	2.69e-10	1.89e-10	12843/23876/14758/54409/76293/21803/57764/16998/207596/14230/20682/100952/80883/108075/16779/81877	16	Yes
TM1_BP_GO:0090025	TM1	BP	GO:0090025	regulation of monocyte chemotaxis	7/693	27/17051	7.74e-05	0.000974384	0.000684405	20315/11820/15945/20563/18787/18133/19252	7	Yes
TM1_BP_GO:0090075	TM1	BP	GO:0090075	relaxation of muscle	7/693	34/17051	0.000366165	0.00341661	0.00239982	11931/242202/11539/60596/16531/18578/19091	7	No
TM1_BP_GO:0090090	TM1	BP	GO:0090090	negative regulation of canonical Wnt signaling pathway	18/693	124/17051	2.67e-06	5.48e-05	3.85e-05	20319/12558/20377/14734/14362/17242/11820/72293/207181/18121/20682/56811/13653/22411/22418/68588/21885/83675	18	Yes
TM1_BP_GO:0090092	TM1	BP	GO:0090092	regulation of transmembrane receptor protein serine/threonine kinase signaling pathway	30/693	237/17051	3.41e-08	1.27e-06	8.92e-07	56213/21825/16007/20319/14313/73230/20377/14734/14362/21808/235505/110075/21809/68939/65112/21803/14165/66695/17131/18121/52662/20482/18133/100952/50766/246154/22418/68010/14118/19663	30	Yes
TM1_BP_GO:0090101	TM1	BP	GO:0090101	negative regulation of transmembrane receptor protein serine/threonine kinase signaling pathway	22/693	119/17051	2.26e-09	1.24e-07	8.74e-08	56213/20319/14313/73230/20377/14362/235505/21809/68939/65112/66695/17131/18121/52662/20482/18133/100952/50766/246154/22418/68010/14118	22	Yes
TM1_BP_GO:0090109	TM1	BP	GO:0090109	regulation of cell-substrate junction assembly	11/693	62/17051	3.54e-05	0.000515288	0.000361937	11815/107581/17926/13640/14758/20971/20194/18186/11856/244895/17387	11	Yes
TM1_BP_GO:0090130	TM1	BP	GO:0090130	tissue migration	42/693	293/17051	9.95e-13	1.63e-10	1.14e-10	13179/20317/20692/21825/68792/13036/11819/12215/67916/73230/68813/11826/15251/15200/21808/20356/24136/20563/21803/21336/80837/14165/18787/11601/14645/14172/13078/16476/20346/18133/20682/16952/16410/11881/18186/21813/16000/11600/27494/22418/15370/14389	42	Yes
TM1_BP_GO:0090132	TM1	BP	GO:0090132	epithelium migration	42/693	292/17051	8.85e-13	1.55e-10	1.09e-10	13179/20317/20692/21825/68792/13036/11819/12215/67916/73230/68813/11826/15251/15200/21808/20356/24136/20563/21803/21336/80837/14165/18787/11601/14645/14172/13078/16476/20346/18133/20682/16952/16410/11881/18186/21813/16000/11600/27494/22418/15370/14389	42	Yes
TM1_BP_GO:0090136	TM1	BP	GO:0090136	epithelial cell-cell adhesion	5/693	16/17051	0.000328498	0.00315512	0.00221615	64817/21828/16419/13078/18133	5	Yes
TM1_BP_GO:0090175	TM1	BP	GO:0090175	regulation of establishment of planar polarity	8/693	41/17051	0.000207753	0.00217875	0.00153035	20319/20377/14734/14362/69217/22411/22418/68588	8	No
TM1_BP_GO:0090177	TM1	BP	GO:0090177	establishment of planar polarity involved in neural tube closure	5/693	16/17051	0.000328498	0.00315512	0.00221615	20319/20377/14362/22418/68588	5	Yes
TM1_BP_GO:0090190	TM1	BP	GO:0090190	positive regulation of branching involved in ureteric bud morphogenesis	5/693	21/17051	0.00129262	0.00946893	0.00665096	21803/14573/18121/20682/94275	5	No
TM1_BP_GO:0090257	TM1	BP	GO:0090257	regulation of muscle system process	27/693	230/17051	7.59e-07	1.89e-05	1.33e-05	16011/11931/11534/242202/68813/14219/54598/74155/11539/21336/238130/12288/17131/11548/19218/16000/74116/109624/60596/11739/16531/18578/98660/230857/13405/19219/19091	27	No
TM1_BP_GO:0090263	TM1	BP	GO:0090263	positive regulation of canonical Wnt signaling pathway	13/693	106/17051	0.00036191	0.00340279	0.00239011	12842/20319/20377/14734/20356/21803/68151/14165/69217/233328/56811/72780/68010	13	Yes
TM1_BP_GO:0090287	TM1	BP	GO:0090287	regulation of cellular response to growth factor stimulus	38/693	280/17051	6.45e-11	5.46e-09	3.84e-09	56213/13179/21825/16007/20319/64103/14733/14313/73230/20377/14734/14362/15251/235505/21809/68939/20563/65112/21803/226101/14165/12509/66695/14172/407831/26427/17131/18121/52662/20482/100952/50766/246154/11600/22418/68010/14118/13405	38	Yes
TM1_BP_GO:0090288	TM1	BP	GO:0090288	negative regulation of cellular response to growth factor stimulus	20/693	100/17051	2.9e-09	1.48e-07	1.04e-07	56213/13179/21825/20319/64103/14733/73230/20377/14362/20563/12509/26427/17131/18121/20482/100952/50766/22418/68010/14118	20	Yes
TM1_BP_GO:0090594	TM1	BP	GO:0090594	inflammatory response to wounding	5/693	18/17051	0.000602218	0.00510481	0.00358561	17242/15251/12628/21857/12505	5	No
TM1_BP_GO:0090596	TM1	BP	GO:0090596	sensory organ morphogenesis	29/693	289/17051	7.25e-06	0.000131355	9.23e-05	329941/12837/18933/232174/14107/11826/15251/20204/18208/14451/218772/22160/12832/14165/14238/330222/27419/18121/21834/11668/20682/12831/50530/231070/22418/320398/17150/68588/12628	29	Yes
TM1_BP_GO:0097191	TM1	BP	GO:0097191	extrinsic apoptotic signaling pathway	28/693	226/17051	1.54e-07	4.76e-06	3.34e-06	21825/17311/20319/18708/20377/51795/21808/14451/21803/16432/12167/14827/16854/14165/18787/14573/20482/20312/16410/64294/80707/18186/27279/16000/77125/11835/11910/15234	28	Yes
TM1_BP_GO:0097192	TM1	BP	GO:0097192	extrinsic apoptotic signaling pathway in absence of ligand	11/693	79/17051	0.00033653	0.00320717	0.00225271	17311/51795/21808/14451/16432/14165/14573/20312/16410/80707/16000	11	No
TM1_BP_GO:0097205	TM1	BP	GO:0097205	renal filtration	6/693	24/17051	0.000316785	0.00306663	0.002154	14456/11826/11539/71602/13617/13057	6	Yes
TM1_BP_GO:0097485	TM1	BP	GO:0097485	neuron projection guidance	32/693	229/17051	1.01e-09	6.68e-08	4.69e-08	13723/20315/20564/11658/23964/13640/12215/21808/11820/20356/18208/20563/14451/12167/11735/13848/14042/11787/20346/14573/18121/18186/13800/22418/12934/16779/399558/18845/16773/14009/18187/77579	32	Yes
TM1_BP_GO:0097529	TM1	BP	GO:0097529	myeloid leukocyte migration	30/693	207/17051	1.39e-09	8.77e-08	6.16e-08	21825/20315/13616/18654/12215/19035/21828/17242/13479/11820/15945/13052/20563/16854/18787/71660/18133/16952/100952/20312/19218/14825/19252/12527/18578/16803/13617/17319/17387/19219	30	Yes
TM1_BP_GO:0097530	TM1	BP	GO:0097530	granulocyte migration	20/693	143/17051	1.37e-06	3.14e-05	2.21e-05	21825/13616/12215/19035/21828/17242/13479/15945/13052/20563/16854/71660/16952/20312/19218/14825/18578/16803/13617/19219	20	Yes
TM1_BP_GO:0097746	TM1	BP	GO:0097746	blood vessel diameter maintenance	29/693	152/17051	2.79e-12	3.6e-10	2.53e-10	13616/20657/242202/17390/68813/15251/12845/11421/11539/74617/14042/58861/21336/12291/238130/14043/12288/11548/20312/19218/60596/16531/27360/17300/98660/16598/13617/230857/19091	29	Yes
TM1_BP_GO:0098742	TM1	BP	GO:0098742	cell-cell adhesion via plasma-membrane adhesion molecules	19/693	201/17051	0.000564514	0.00484376	0.00340225	13723/64085/11658/23964/13640/12215/12558/14735/319387/21808/224024/13052/330222/12552/20312/80883/21813/192167/331461	19	No
TM1_BP_GO:0098801	TM1	BP	GO:0098801	regulation of renal system process	8/693	40/17051	0.000173317	0.00187366	0.00131606	14456/11421/11539/21336/19218/14683/19219/13057	8	No
TM1_BP_GO:0098868	TM1	BP	GO:0098868	bone growth	8/693	30/17051	1.89e-05	0.000299149	0.000210122	21825/23876/12845/218772/13601/14042/20682/21813	8	Yes
TM1_BP_GO:0110020	TM1	BP	GO:0110020	regulation of actomyosin structure organization	13/693	106/17051	0.00036191	0.00340279	0.00239011	17926/18708/14219/20971/21809/20194/21336/18186/104027/22411/11853/11856/19219	13	No
TM1_BP_GO:0110053	TM1	BP	GO:0110053	regulation of actin filament organization	22/693	267/17051	0.0013743	0.00996316	0.0069981	17926/18708/14219/20971/21809/20194/20356/231637/20563/12386/21336/20742/170643/20312/11472/18186/104027/22411/27360/11853/11856/19219	22	No
TM1_BP_GO:0110110	TM1	BP	GO:0110110	positive regulation of animal organ morphogenesis	8/693	37/17051	9.69e-05	0.00116561	0.000818721	21803/14165/14573/20682/22411/22418/11835/13617	8	No
TM1_BP_GO:0110148	TM1	BP	GO:0110148	biomineralization	29/693	153/17051	3.31e-12	4.06e-10	2.85e-10	12843/14456/12842/16007/14758/27047/14734/15251/12845/100038882/21803/12167/16998/22160/13601/17313/11732/66695/21847/73121/20682/12608/22411/381629/16000/13386/70370/94249/18605	29	Yes
TM1_BP_GO:0110149	TM1	BP	GO:0110149	regulation of biomineralization	21/693	94/17051	1.33e-10	1.07e-08	7.5e-09	14456/16007/14758/27047/15251/12845/100038882/21803/12167/16998/22160/13601/17313/11732/66695/73121/20682/12608/381629/70370/18605	21	Yes
TM1_BP_GO:0110150	TM1	BP	GO:0110150	negative regulation of biomineralization	9/693	25/17051	3.27e-07	9.07e-06	6.37e-06	14456/15251/21803/16998/13601/66695/73121/20682/18605	9	Yes
TM1_BP_GO:0140058	TM1	BP	GO:0140058	neuron projection arborization	6/693	28/17051	0.00077197	0.00624189	0.00438429	21983/20346/80883/18186/192167/22418	6	No
TM1_BP_GO:0150063	TM1	BP	GO:0150063	visual system development	45/693	388/17051	2.34e-10	1.74e-08	1.22e-08	329941/12215/12837/14107/11826/15251/12955/21808/24136/14451/21803/218772/12167/22160/12832/17132/80837/14165/18081/12288/242022/14238/330222/27419/13078/16476/21834/20482/23928/11668/20682/12831/18186/21813/50530/16779/17150/18595/12628/114142/17300/22352/19378/29876/77579	45	Yes
TM1_BP_GO:0150115	TM1	BP	GO:0150115	cell-substrate junction organization	16/693	98/17051	1.97e-06	4.27e-05	3e-05	14268/11815/107581/17926/13640/18708/14758/20971/20194/109711/11472/16410/18186/11856/244895/17387	16	Yes
TM1_BP_GO:0150116	TM1	BP	GO:0150116	regulation of cell-substrate junction organization	12/693	67/17051	1.42e-05	0.000231787	0.000162807	11815/107581/17926/13640/18708/14758/20971/20194/18186/11856/244895/17387	12	Yes
TM1_BP_GO:0198738	TM1	BP	GO:0198738	cell-cell signaling by wnt	40/693	407/17051	2.39e-07	6.97e-06	4.9e-06	12842/17926/20319/67916/12558/20377/14735/242939/14734/24117/14362/17242/11820/56332/72293/20356/24136/21803/68151/14042/14165/207181/18121/20682/69217/233328/56811/18647/80707/13653/22411/22418/72780/68588/672511/21885/68010/26563/83675/12505	40	Yes
TM1_BP_GO:1900024	TM1	BP	GO:1900024	regulation of substrate adhesion-dependent cell spreading	9/693	58/17051	0.000513366	0.00448327	0.00314904	17926/13640/68813/50706/17242/20194/18003/14114/18186	9	Yes
TM1_BP_GO:1900046	TM1	BP	GO:1900046	regulation of hemostasis	11/693	62/17051	3.54e-05	0.000515288	0.000361937	21825/12258/12845/18590/27973/18787/19218/12527/12306/18595/19091	11	Yes
TM1_BP_GO:1900047	TM1	BP	GO:1900047	negative regulation of hemostasis	10/693	44/17051	8.16e-06	0.000144544	0.000101528	21825/12258/12845/18590/18787/19218/12527/12306/18595/19091	10	Yes
TM1_BP_GO:1901136	TM1	BP	GO:1901136	carbohydrate derivative catabolic process	15/693	127/17051	0.00020029	0.00211926	0.00148856	13010/12654/71665/14733/242202/15211/72269/21803/83921/13039/15212/14667/18573/71207/12505	15	No
TM1_BP_GO:1901214	TM1	BP	GO:1901214	regulation of neuron death	31/693	374/17051	0.000143891	0.00162722	0.00114296	20317/12759/14362/17242/15251/21808/14281/11820/21809/18039/231637/11539/19122/22187/16476/14573/12931/20312/19063/12608/18186/13653/16000/66208/11600/64138/15505/22418/17748/16531/12804	31	Yes
TM1_BP_GO:1901342	TM1	BP	GO:1901342	regulation of vasculature development	47/693	285/17051	1.74e-16	7.11e-14	4.99e-14	13179/20317/20692/21825/23876/13036/20319/19223/21826/64103/18654/12654/73230/54409/11826/17242/15251/21808/15945/20356/13601/58861/16854/80837/12394/18787/11601/12828/14645/11504/12509/14172/26427/13078/12827/100952/20312/18186/21813/27279/27494/22418/12226/17300/16598/15234/19219	47	Yes
TM1_BP_GO:1901343	TM1	BP	GO:1901343	negative regulation of vasculature development	21/693	109/17051	2.39e-09	1.29e-07	9.06e-08	13179/20317/20692/21825/23876/21826/64103/21808/15945/18787/11601/12828/11504/12509/26427/12827/100952/27494/17300/16598/19219	21	Yes
TM1_BP_GO:1901888	TM1	BP	GO:1901888	regulation of cell junction assembly	27/693	211/17051	1.32e-07	4.18e-06	2.94e-06	11815/68792/107581/17926/64085/13640/21826/18708/14758/14735/14362/319387/11820/20971/20194/21983/11421/18208/18186/192167/22418/399558/331461/320840/11856/244895/17387	27	Yes
TM1_BP_GO:1901890	TM1	BP	GO:1901890	positive regulation of cell junction assembly	15/693	117/17051	7.88e-05	0.000976977	0.000686226	68792/107581/17926/64085/13640/21826/18708/319387/20971/20194/21983/18186/192167/399558/331461	15	Yes
TM1_BP_GO:1902041	TM1	BP	GO:1902041	regulation of extrinsic apoptotic signaling pathway via death domain receptors	9/693	45/17051	6.84e-05	0.000879433	0.000617712	21825/20319/20377/12167/16854/18787/20482/11910/15234	9	Yes
TM1_BP_GO:1902043	TM1	BP	GO:1902043	positive regulation of extrinsic apoptotic signaling pathway via death domain receptors	5/693	14/17051	0.000161121	0.0017563	0.00123362	21825/20377/12167/20482/11910	5	No
TM1_BP_GO:1902105	TM1	BP	GO:1902105	regulation of leukocyte differentiation	27/693	290/17051	5.59e-05	0.000747156	0.000524801	14456/17311/18708/20377/19659/232174/17242/14281/21803/12394/17131/16476/21847/16952/14190/12608/21813/16362/13386/14683/12053/83924/12192/14118/65963/17387/12505	27	Yes
TM1_BP_GO:1902106	TM1	BP	GO:1902106	negative regulation of leukocyte differentiation	13/693	103/17051	0.000272087	0.00271976	0.00191035	18708/20377/17242/12394/17131/16952/14190/16362/12053/83924/14118/65963/12505	13	No
TM1_BP_GO:1902107	TM1	BP	GO:1902107	positive regulation of leukocyte differentiation	16/693	166/17051	0.00121869	0.00902164	0.00633678	14456/17311/17242/14281/21803/12394/16476/21847/16952/21813/16362/13386/14683/12053/12192/17387	16	Yes
TM1_BP_GO:1902229	TM1	BP	GO:1902229	regulation of intrinsic apoptotic signaling pathway in response to DNA damage	7/693	36/17051	0.000529488	0.00458329	0.00321929	12759/20315/68428/20482/17319/22038/12505	7	No
TM1_BP_GO:1902284	TM1	BP	GO:1902284	neuron projection extension involved in neuron projection guidance	8/693	36/17051	7.87e-05	0.000976977	0.000686226	20315/20564/20356/20563/20346/18186/22418/18187	8	No
TM1_BP_GO:1902893	TM1	BP	GO:1902893	regulation of pri-miRNA transcription by RNA polymerase II	9/693	55/17051	0.00034161	0.00323672	0.00227347	15251/21808/14281/11820/21803/16476/20682/13653/12224	9	No
TM1_BP_GO:1902903	TM1	BP	GO:1902903	regulation of supramolecular fiber organization	32/693	367/17051	4.33e-05	0.000610246	0.000428636	12759/17926/11568/18708/17756/14219/15530/12955/11820/20971/21809/20194/20356/231637/20563/12386/21336/20742/16835/170643/100952/20312/11472/18186/104027/22411/27360/11853/17318/11856/15481/19219	32	No
TM1_BP_GO:1902904	TM1	BP	GO:1902904	negative regulation of supramolecular fiber organization	16/693	165/17051	0.00114313	0.0085266	0.00598907	12759/17926/18708/17756/15530/12955/231637/20563/12386/20742/16835/100952/27360/17318/11856/15481	16	No
TM1_BP_GO:1902947	TM1	BP	GO:1902947	regulation of tau-protein kinase activity	4/693	12/17051	0.00103106	0.00785781	0.00551931	12759/11820/13653/15234	4	No
TM1_BP_GO:1903018	TM1	BP	GO:1903018	regulation of glycoprotein metabolic process	9/693	50/17051	0.000161302	0.0017563	0.00123362	13010/16431/15200/56374/16432/56175/64294/16000/77125	9	No
TM1_BP_GO:1903019	TM1	BP	GO:1903019	negative regulation of glycoprotein metabolic process	7/693	17/17051	2.42e-06	5.1e-05	3.58e-05	13010/16431/15200/56374/16432/56175/64294	7	Yes
TM1_BP_GO:1903034	TM1	BP	GO:1903034	regulation of response to wounding	19/693	159/17051	2.53e-05	0.000388346	0.000272773	21825/67916/12258/17242/15200/235505/18590/27973/18787/16952/19218/27279/12527/12306/18595/67866/17319/19219/19091	19	Yes
TM1_BP_GO:1903035	TM1	BP	GO:1903035	negative regulation of response to wounding	12/693	85/17051	0.000160023	0.0017563	0.00123362	21825/12258/17242/235505/18590/18787/19218/12527/12306/18595/67866/19091	12	Yes
TM1_BP_GO:1903038	TM1	BP	GO:1903038	negative regulation of leukocyte cell-cell adhesion	15/693	130/17051	0.000259413	0.00260901	0.00183256	20315/242202/17242/20971/21803/19122/16854/12394/17131/16952/14190/12608/16362/12053/12505	15	No
TM1_BP_GO:1903510	TM1	BP	GO:1903510	mucopolysaccharide metabolic process	13/693	62/17051	9.74e-07	2.33e-05	1.64e-05	13179/12111/56773/21803/83921/14042/14043/94214/11600/23908/209378/19219/12505	13	No
TM1_BP_GO:1903522	TM1	BP	GO:1903522	regulation of blood circulation	30/693	234/17051	2.55e-08	9.77e-07	6.86e-07	13616/11931/18708/242202/17390/68813/14219/15251/15200/21808/11820/13052/11539/58861/21336/12291/238130/12288/17131/20346/11548/21834/20312/19218/12293/18578/27360/98660/13405/19091	30	Yes
TM1_BP_GO:1903523	TM1	BP	GO:1903523	negative regulation of blood circulation	6/693	30/17051	0.00113545	0.00848218	0.00595786	18708/242202/11820/11539/98660/19091	6	No
TM1_BP_GO:1903555	TM1	BP	GO:1903555	regulation of tumor necrosis factor superfamily cytokine production	19/693	166/17051	4.61e-05	0.000641125	0.000450325	12759/21825/14456/18708/11820/74155/22160/109815/20312/16000/11600/22418/77125/83397/16803/17319/22695/19219/13057	19	Yes
TM1_BP_GO:1903706	TM1	BP	GO:1903706	regulation of hemopoiesis	31/693	360/17051	7.17e-05	0.000915777	0.00064324	14456/17311/18708/20377/19659/232174/17242/15251/14281/100038882/21803/12394/17131/16476/21847/16952/14190/12608/21813/16362/13386/14683/12053/83924/12192/14118/65963/18035/17387/22695/12505	31	Yes
TM1_BP_GO:1903707	TM1	BP	GO:1903707	negative regulation of hemopoiesis	13/693	105/17051	0.00032952	0.00315876	0.0022187	18708/20377/17242/12394/17131/16952/14190/16362/12053/83924/14118/65963/12505	13	No
TM1_BP_GO:1903708	TM1	BP	GO:1903708	positive regulation of hemopoiesis	16/693	166/17051	0.00121869	0.00902164	0.00633678	14456/17311/17242/14281/21803/12394/16476/21847/16952/21813/16362/13386/14683/12053/12192/17387	16	Yes
TM1_BP_GO:1903844	TM1	BP	GO:1903844	regulation of cellular response to transforming growth factor beta stimulus	15/693	115/17051	6.45e-05	0.000839894	0.000589939	56213/21825/235505/21809/68939/65112/21803/66695/17131/52662/20482/100952/246154/68010/14118	15	No
TM1_BP_GO:1904018	TM1	BP	GO:1904018	positive regulation of vasculature development	26/693	163/17051	2.21e-09	1.24e-07	8.74e-08	21825/13036/20319/19223/18654/12654/73230/54409/11826/17242/15251/20356/13601/58861/16854/12394/18787/11601/14172/13078/20312/18186/21813/22418/12226/15234	26	Yes
TM1_BP_GO:1904019	TM1	BP	GO:1904019	epithelial cell apoptotic process	13/693	117/17051	0.000936913	0.00733689	0.00515341	21825/14456/56312/54409/17242/20356/18787/12828/21813/16000/11600/12192/22695	13	No
TM1_BP_GO:1904035	TM1	BP	GO:1904035	regulation of epithelial cell apoptotic process	11/693	92/17051	0.00124362	0.00916471	0.00643727	21825/14456/56312/54409/17242/20356/18787/16000/11600/12192/22695	11	No
TM1_BP_GO:1904036	TM1	BP	GO:1904036	negative regulation of epithelial cell apoptotic process	8/693	50/17051	0.000846254	0.00671278	0.00471504	14456/56312/54409/17242/20356/18787/16000/11600	8	No
TM1_BP_GO:1904062	TM1	BP	GO:1904062	regulation of cation transmembrane transport	28/693	358/17051	0.000746771	0.00607819	0.00426931	13616/11931/21808/11820/15945/21803/22160/269994/11735/19122/12288/59095/20312/11472/19218/192167/12293/11739/18578/98660/13167/14199/13617/432442/13405/19091/13057/329152	28	No
TM1_BP_GO:1904705	TM1	BP	GO:1904705	regulation of vascular associated smooth muscle cell proliferation	9/693	60/17051	0.000663061	0.00552513	0.00388084	16011/17390/21809/19737/11504/16476/16000/15446/19091	9	No
TM1_BP_GO:1904738	TM1	BP	GO:1904738	vascular associated smooth muscle cell migration	7/693	30/17051	0.000159607	0.0017563	0.00123362	16011/68813/231637/238130/11504/18552/19091	7	No
TM1_BP_GO:1904752	TM1	BP	GO:1904752	regulation of vascular associated smooth muscle cell migration	7/693	29/17051	0.000126774	0.00146402	0.00102832	16011/68813/231637/238130/11504/18552/19091	7	No
TM1_BP_GO:1904754	TM1	BP	GO:1904754	positive regulation of vascular associated smooth muscle cell migration	6/693	19/17051	7.6e-05	0.000961125	0.000675092	16011/68813/231637/238130/11504/18552	6	No
TM1_BP_GO:1904888	TM1	BP	GO:1904888	cranial skeletal system development	12/693	67/17051	1.42e-05	0.000231787	0.000162807	18933/20204/21808/21809/14451/22160/14042/21813/231070/14683/18595/17387	12	Yes
TM1_BP_GO:1905314	TM1	BP	GO:1905314	semi-lunar valve development	7/693	32/17051	0.000245865	0.00249953	0.00175566	20564/21808/20563/21803/22160/20682/100952	7	No
TM1_BP_GO:1905330	TM1	BP	GO:1905330	regulation of morphogenesis of an epithelium	15/693	66/17051	4.57e-08	1.64e-06	1.15e-06	20377/17242/15945/18590/21803/57764/14165/14573/18121/20682/94275/22418/18595/11835/15234	15	Yes
TM1_BP_GO:1905332	TM1	BP	GO:1905332	positive regulation of morphogenesis of an epithelium	8/693	37/17051	9.69e-05	0.00116561	0.000818721	17242/21803/14573/18121/20682/94275/18595/11835	8	No
TM1_BP_GO:1905517	TM1	BP	GO:1905517	macrophage migration	9/693	58/17051	0.000513366	0.00448327	0.00314904	21825/17242/16854/71660/100952/20312/12527/17319/17387	9	No
TM1_BP_GO:1905521	TM1	BP	GO:1905521	regulation of macrophage migration	8/693	43/17051	0.000293505	0.00291014	0.00204408	21825/17242/71660/100952/20312/12527/17319/17387	8	Yes
TM1_BP_GO:1905906	TM1	BP	GO:1905906	regulation of amyloid fibril formation	5/693	14/17051	0.000161121	0.0017563	0.00123362	12759/15530/12955/11820/16835	5	No
TM1_BP_GO:1905907	TM1	BP	GO:1905907	negative regulation of amyloid fibril formation	4/693	11/17051	0.000710111	0.00582814	0.00409367	12759/15530/12955/16835	4	No
TM1_BP_GO:1905939	TM1	BP	GO:1905939	regulation of gonad development	5/693	15/17051	0.000233623	0.00241394	0.00169555	56312/22762/12394/20346/20682	5	No
TM1_BP_GO:1905941	TM1	BP	GO:1905941	positive regulation of gonad development	4/693	10/17051	0.000466861	0.00415853	0.00292094	22762/12394/20346/20682	4	No
TM1_BP_GO:1990266	TM1	BP	GO:1990266	neutrophil migration	17/693	116/17051	4.41e-06	8.52e-05	5.98e-05	13616/12215/19035/21828/17242/13479/15945/13052/20563/16854/20312/19218/14825/18578/16803/13617/19219	17	Yes
TM1_BP_GO:1990868	TM1	BP	GO:1990868	response to chemokine	9/693	66/17051	0.00133759	0.00975817	0.00685412	20315/20564/15251/15945/20563/20312/14825/19252/17300	9	Yes
TM1_BP_GO:1990869	TM1	BP	GO:1990869	cellular response to chemokine	9/693	66/17051	0.00133759	0.00975817	0.00685412	20315/20564/15251/15945/20563/20312/14825/19252/17300	9	Yes
TM1_BP_GO:1990874	TM1	BP	GO:1990874	vascular associated smooth muscle cell proliferation	9/693	60/17051	0.000663061	0.00552513	0.00388084	16011/17390/21809/19737/11504/16476/16000/15446/19091	9	No
TM1_BP_GO:2000027	TM1	BP	GO:2000027	regulation of animal organ morphogenesis	19/693	123/17051	5.34e-07	1.37e-05	9.59e-06	20319/20377/14734/14362/18590/21803/57764/14165/14573/18121/20682/69217/22411/94275/22418/68588/11835/13617/15234	19	Yes
TM1_BP_GO:2000050	TM1	BP	GO:2000050	regulation of non-canonical Wnt signaling pathway	7/693	25/17051	4.5e-05	0.00062987	0.000442419	20319/20377/14734/69217/22418/72780/672511	7	Yes
TM1_BP_GO:2000052	TM1	BP	GO:2000052	positive regulation of non-canonical Wnt signaling pathway	5/693	14/17051	0.000161121	0.0017563	0.00123362	20377/14734/69217/22418/72780	5	Yes
TM1_BP_GO:2000106	TM1	BP	GO:2000106	regulation of leukocyte apoptotic process	12/693	95/17051	0.000459548	0.00412333	0.00289622	14456/20315/17311/15251/21808/16854/109815/16952/22418/14605/17319/12505	12	No
TM1_BP_GO:2000146	TM1	BP	GO:2000146	negative regulation of cell motility	36/693	283/17051	1.27e-09	8.17e-08	5.74e-08	13179/20317/16011/21825/20315/11815/114886/20319/11819/13134/20377/13479/20563/21803/11539/18787/11601/11857/13078/20346/18121/14114/12798/52662/18133/100952/20312/22240/22411/19252/77125/21857/29876/17319/19219/19091	36	Yes
TM1_BP_GO:2000181	TM1	BP	GO:2000181	negative regulation of blood vessel morphogenesis	21/693	108/17051	2.01e-09	1.19e-07	8.33e-08	13179/20317/20692/21825/23876/21826/64103/21808/15945/18787/11601/12828/11504/12509/26427/12827/100952/27494/17300/16598/19219	21	Yes
TM1_BP_GO:2000241	TM1	BP	GO:2000241	regulation of reproductive process	19/693	174/17051	8.77e-05	0.00107603	0.000755805	20317/56312/53381/242202/20377/22762/67968/21336/12394/11857/20346/20682/16000/22418/21857/11835/27206/19215/19219	19	No
TM1_BP_GO:2000377	TM1	BP	GO:2000377	regulation of reactive oxygen species metabolic process	18/693	200/17051	0.00137253	0.00996316	0.0069981	12759/21825/23876/19223/17392/15251/12955/11820/21803/109815/13078/21813/14825/16000/15937/16598/19219/13057	18	Yes
TM1_BP_GO:2001233	TM1	BP	GO:2001233	regulation of apoptotic signaling pathway	40/693	381/17051	4.02e-08	1.46e-06	1.03e-06	12759/21825/20315/13036/20319/56312/20377/15251/51795/21808/14451/68428/12167/14827/16854/14165/18787/109815/22187/117198/26427/14573/18121/20482/20312/16410/64294/80707/18186/27279/16000/94275/15505/15937/11835/11910/15234/17319/22038/12505	40	Yes
TM1_BP_GO:2001234	TM1	BP	GO:2001234	negative regulation of apoptotic signaling pathway	23/693	228/17051	5.79e-05	0.000768322	0.000539668	12759/20315/20319/15251/14451/16854/14165/18787/109815/117198/26427/14573/18121/20312/16410/18186/16000/15505/15937/11835/15234/17319/12505	23	Yes
TM1_BP_GO:2001235	TM1	BP	GO:2001235	positive regulation of apoptotic signaling pathway	18/693	152/17051	4.62e-05	0.000641125	0.000450325	12759/21825/13036/56312/20377/51795/21808/68428/12167/14827/22187/20482/64294/80707/27279/94275/11910/22038	18	Yes
TM1_BP_GO:2001236	TM1	BP	GO:2001236	regulation of extrinsic apoptotic signaling pathway	23/693	159/17051	1.2e-07	3.83e-06	2.69e-06	21825/20319/20377/51795/21808/14451/12167/14827/16854/14165/18787/14573/20482/20312/16410/64294/80707/18186/27279/16000/11835/11910/15234	23	Yes
TM1_BP_GO:2001237	TM1	BP	GO:2001237	negative regulation of extrinsic apoptotic signaling pathway	12/693	97/17051	0.000556751	0.00478552	0.00336134	20319/14451/16854/14165/18787/14573/20312/16410/18186/16000/11835/15234	12	Yes
TM1_BP_GO:2001238	TM1	BP	GO:2001238	positive regulation of extrinsic apoptotic signaling pathway	11/693	58/17051	1.84e-05	0.000291816	0.000204971	21825/20377/51795/21808/12167/14827/20482/64294/80707/27279/11910	11	Yes
TM1_CC_GO:0000323	TM1	CC	GO:0000323	lytic vacuole	41/702	439/17193	7.38e-07	3.65e-05	2.82e-05	13010/13036/66141/71665/56464/13038/15211/14734/14325/14319/11820/54598/56374/11421/54381/17160/11735/13039/17159/78610/14590/19025/16835/11758/15212/16952/14667/64294/19063/11881/381629/18807/64138/83924/13033/17748/12306/15944/12492/105171/15481	41	No
TM1_CC_GO:0001527	TM1	CC	GO:0001527	microfibril	6/702	13/17193	6.09e-06	0.00016927	0.000130931	76293/207596/50530/108075/17150/14118	6	No
TM1_CC_GO:0005581	TM1	CC	GO:0005581	collagen trimer	23/702	75/17193	1.27e-14	1.13e-12	8.75e-13	329941/12843/12816/13179/12842/12835/107581/17022/12837/12833/12834/12829/140792/69183/12832/12828/12827/100952/12831/68588/12830/109323/237759	23	Yes
TM1_CC_GO:0005583	TM1	CC	GO:0005583	fibrillar collagen trimer	6/702	11/17193	1.76e-06	6.02e-05	4.65e-05	12843/12842/107581/17022/12832/12831	6	Yes
TM1_CC_GO:0005604	TM1	CC	GO:0005604	basement membrane	38/702	114/17193	8.58e-25	9.55e-23	7.38e-23	14268/329941/20317/20692/13010/21858/13640/21826/16949/12837/21828/216616/54156/15530/12829/21808/67896/18208/57764/12394/12828/210530/11504/242022/14114/23928/12827/12831/80883/16779/231470/12306/21923/12496/12830/21857/16773/14118	38	Yes
TM1_CC_GO:0005614	TM1	CC	GO:0005614	interstitial matrix	5/702	16/17193	0.000335619	0.00597402	0.00462094	407800/67896/16000/21923/320712	5	Yes
TM1_CC_GO:0005764	TM1	CC	GO:0005764	lysosome	41/702	439/17193	7.38e-07	3.65e-05	2.82e-05	13010/13036/66141/71665/56464/13038/15211/14734/14325/14319/11820/54598/56374/11421/54381/17160/11735/13039/17159/78610/14590/19025/16835/11758/15212/16952/14667/64294/19063/11881/381629/18807/64138/83924/13033/17748/12306/15944/12492/105171/15481	41	No
TM1_CC_GO:0005788	TM1	CC	GO:0005788	endoplasmic reticulum lumen	11/702	84/17193	0.000598515	0.00918412	0.00710398	12759/14827/105245/71853/216440/114679/12304/93684/22418/18552/22027	11	Yes
TM1_CC_GO:0005790	TM1	CC	GO:0005790	smooth endoplasmic reticulum	10/702	36/17193	1.17e-06	5.21e-05	4.03e-05	53381/19035/17756/319984/14827/338367/71853/20192/12304/22027	10	Yes
TM1_CC_GO:0005793	TM1	CC	GO:0005793	endoplasmic reticulum-Golgi intermediate compartment	10/702	71/17193	0.000586703	0.00918412	0.00710398	14268/67916/66111/53322/12406/18220/68581/71853/67511/56334	10	Yes
TM1_CC_GO:0005796	TM1	CC	GO:0005796	Golgi lumen	7/702	21/17193	1.29e-05	0.000338502	0.000261834	14733/20657/14735/14734/15530/20971/20318	7	Yes
TM1_CC_GO:0009897	TM1	CC	GO:0009897	external side of plasma membrane	33/702	417/17193	0.000230142	0.00445276	0.00344424	21825/20315/11658/13640/16157/14735/13038/15945/11421/105727/14658/13039/16854/17304/12509/16835/110454/12931/16952/16410/21813/27494/13386/192167/12527/18595/16531/12628/230857/16880/12804/77446/12505	33	No
TM1_CC_GO:0016528	TM1	CC	GO:0016528	sarcoplasm	11/702	82/17193	0.000485684	0.00800479	0.00619176	21825/21828/24052/319984/11735/19416/210530/20192/12293/22027/432442	11	Yes
TM1_CC_GO:0030141	TM1	CC	GO:0030141	secretory granule	30/702	336/17193	5.25e-05	0.00123001	0.000951422	78896/20692/21825/18619/12842/13036/21826/16949/12215/15211/11826/21808/21809/13052/21803/14827/13039/18787/68581/109711/69048/15212/56175/20482/56334/16000/18552/230857/19091/18484	30	Yes
TM1_CC_GO:0030312	TM1	CC	GO:0030312	external encapsulating structure	134/702	474/17193	2.4e-76	5.34e-74	4.13e-74	14268/14264/329941/12843/56213/12816/13179/20317/20692/21825/12111/23876/20200/64817/13010/12842/18295/68792/12835/107581/16007/17926/116847/17183/16012/17022/21858/13640/21826/16949/12837/22403/11647/14733/73230/17392/20657/27047/20377/14735/17390/16997/242939/12833/21828/50706/12834/269959/12258/216616/14734/14219/54156/15530/12829/21808/12845/12643/407800/21809/20194/67896/230971/76477/76293/1…	134	Yes
TM1_CC_GO:0030315	TM1	CC	GO:0030315	T-tubule	10/702	69/17193	0.000464845	0.00795601	0.00615403	11931/12558/21809/11735/12288/11548/12293/98660/13617/432442	10	No
TM1_CC_GO:0031012	TM1	CC	GO:0031012	extracellular matrix	134/702	473/17193	1.78e-76	5.34e-74	4.13e-74	14268/14264/329941/12843/56213/12816/13179/20317/20692/21825/12111/23876/20200/64817/13010/12842/18295/68792/12835/107581/16007/17926/116847/17183/16012/17022/21858/13640/21826/16949/12837/22403/11647/14733/73230/17392/20657/27047/20377/14735/17390/16997/242939/12833/21828/50706/12834/269959/12258/216616/14734/14219/54156/15530/12829/21808/12845/12643/407800/21809/20194/67896/230971/76477/76293/1…	134	Yes
TM1_CC_GO:0031594	TM1	CC	GO:0031594	neuromuscular junction	14/702	95/17193	3e-05	0.000742406	0.000574256	21828/50706/18040/11820/18039/13052/11735/208898/102866/16779/12830/16773/22142/77579	14	No
TM1_CC_GO:0032432	TM1	CC	GO:0032432	actin filament bundle	13/702	89/17193	6.31e-05	0.00140301	0.00108524	12955/102866/109711/208431/73121/12798/104027/27494/13800/12306/26563/77579/13057	13	Yes
TM1_CC_GO:0042383	TM1	CC	GO:0042383	sarcolemma	24/702	163/17193	4.94e-08	3.14e-06	2.43e-06	12111/12835/12215/11931/12558/12833/11826/12834/21809/24052/11735/12288/20192/11548/16952/14683/12293/12306/16773/98660/13617/432442/13405/19091	24	Yes
TM1_CC_GO:0043209	TM1	CC	GO:0043209	myelin sheath	20/702	207/17193	0.000326135	0.00597402	0.00462094	17926/11931/12955/18040/18039/14827/338367/22187/14645/18477/12934/21881/17449/11739/12306/98660/14862/22142/15481/17319	20	Yes
TM1_CC_GO:0043230	TM1	CC	GO:0043230	extracellular organelle	13/702	96/17193	0.000139346	0.0029528	0.00228401	14268/11647/11826/11421/18787/27419/16952/246154/12527/14469/12306/15481/229900	13	No
TM1_CC_GO:0045121	TM1	CC	GO:0045121	membrane raft	35/702	369/17193	3.39e-06	0.000106712	8.25e-05	19223/12215/11931/14733/67916/14758/12558/11826/11820/20971/20194/13052/226101/12406/19122/338367/12288/16835/19012/170643/19063/21813/11600/14683/13033/193740/11739/12306/16531/98660/13617/22142/15481/13405/22038	35	Yes
TM1_CC_GO:0045177	TM1	CC	GO:0045177	apical part of cell	34/702	434/17193	0.000224662	0.00445276	0.00344424	78896/14268/16008/66141/11931/12558/14107/11826/13479/11820/56332/68070/105727/14827/13039/67968/16526/16835/69048/208431/16952/74720/110350/12527/63959/193740/16531/54670/56615/29876/432442/12804/12505/13057	34	Yes
TM1_CC_GO:0062023	TM1	CC	GO:0062023	collagen-containing extracellular matrix	116/702	358/17193	3.89e-73	5.77e-71	4.46e-71	14268/14264/329941/12843/56213/12816/13179/20317/20692/21825/12111/23876/20200/13010/12842/18295/68792/12835/107581/16007/17926/116847/17183/16012/17022/21858/13640/21826/16949/12837/14733/73230/20657/27047/20377/14735/16997/12833/21828/50706/12834/12258/216616/14734/54156/15530/12829/21808/12845/407800/21809/20194/67896/230971/76477/76293/18208/20563/21803/57764/16998/13039/140792/13601/12406/12…	116	Yes
TM1_CC_GO:0098643	TM1	CC	GO:0098643	banded collagen fibril	6/702	11/17193	1.76e-06	6.02e-05	4.65e-05	12843/12842/107581/17022/12832/12831	6	Yes
TM1_CC_GO:0098644	TM1	CC	GO:0098644	complex of collagen trimers	10/702	17/17193	1.81e-10	1.35e-08	1.04e-08	12843/12842/107581/17022/12829/12832/12828/12827/12831/12830	10	Yes
TM1_CC_GO:0098857	TM1	CC	GO:0098857	membrane microdomain	35/702	370/17193	3.6e-06	0.000106712	8.25e-05	19223/12215/11931/14733/67916/14758/12558/11826/11820/20971/20194/13052/226101/12406/19122/338367/12288/16835/19012/170643/19063/21813/11600/14683/13033/193740/11739/12306/16531/98660/13617/22142/15481/13405/22038	35	Yes
TM1_CC_GO:0098858	TM1	CC	GO:0098858	actin-based cell projection	25/702	209/17193	1.49e-06	6.02e-05	4.65e-05	17311/14107/17756/11820/13052/18590/21803/13039/338367/102866/238130/11472/16410/80707/17909/11600/71602/192167/13800/18595/54670/29876/11853/13405/12505	25	No
TM1_MF_GO:0001540	TM1	MF	GO:0001540	amyloid-beta binding	10/686	62/16912	0.000179983	0.00309971	0.00269448	12759/13010/16431/12955/21808/16432/19122/11787/16835/64294	10	No
TM1_MF_GO:0001664	TM1	MF	GO:0001664	G protein-coupled receptor binding	27/686	276/16912	2.27e-05	0.00048816	0.000424343	18619/20315/17926/13616/170458/57266/20377/14362/11820/15945/11421/11539/19122/68151/20312/14825/22411/14683/22418/72780/193740/68588/105171/67775/68010/15481/66102	27	Yes
TM1_MF_GO:0001968	TM1	MF	GO:0001968	fibronectin binding	15/686	32/16912	3.39e-13	2.19e-11	1.9e-11	16011/21825/17926/16012/17390/13038/21828/14219/12845/20971/67896/14114/16410/17150/21923	15	Yes
TM1_MF_GO:0002020	TM1	MF	GO:0002020	protease binding	20/686	138/16912	7.47e-07	2.89e-05	2.52e-05	14268/12843/13010/12842/21858/232345/15530/12845/13601/19122/18787/109815/16835/216440/16410/193740/12306/21857/13014/17319	20	Yes
TM1_MF_GO:0004180	TM1	MF	GO:0004180	carboxypeptidase activity	10/686	38/16912	1.9e-06	6.71e-05	5.83e-05	55987/11568/56264/242939/11421/54381/13039/74617/19025/64138	10	Yes
TM1_MF_GO:0004601	TM1	MF	GO:0004601	peroxidase activity	10/686	45/16912	9.94e-06	0.000275606	0.000239576	114886/53381/11758/14778/93684/18477/56615/625249/14871/100503605	10	Yes
TM1_MF_GO:0004866	TM1	MF	GO:0004866	endopeptidase inhibitor activity	19/686	155/16912	1.71e-05	0.000401267	0.000348809	20317/14456/13010/21858/232345/12258/235505/13479/11820/12406/19122/18787/50766/20568/12306/21857/209378/13014/67866	19	Yes
TM1_MF_GO:0004867	TM1	MF	GO:0004867	serine-type endopeptidase inhibitor activity	12/686	86/16912	0.000175911	0.00309842	0.00269337	20317/232345/12258/235505/11820/12406/18787/50766/20568/12306/209378/67866	12	Yes
TM1_MF_GO:0005109	TM1	MF	GO:0005109	frizzled binding	9/686	38/16912	1.6e-05	0.000387386	0.000336743	17926/20377/14362/11820/22411/22418/72780/68588/68010	9	Yes
TM1_MF_GO:0005126	TM1	MF	GO:0005126	cytokine receptor binding	26/686	250/16912	1.1e-05	0.000292888	0.000254599	20315/17311/13640/18654/57266/18708/53322/21808/21809/15945/68939/21803/13601/11601/17131/14573/12931/20312/21813/14825/11600/77125/16880/17319/12505/66102	26	Yes
TM1_MF_GO:0005160	TM1	MF	GO:0005160	transforming growth factor beta receptor binding	8/686	26/16912	5.74e-06	0.000177963	0.000154698	21808/21809/68939/21803/17131/14573/21813/12505	8	No
TM1_MF_GO:0005178	TM1	MF	GO:0005178	integrin binding	33/686	133/16912	2.2e-17	3.41e-15	2.96e-15	14268/223272/21825/20315/23876/107581/16007/21858/22403/67916/21828/14219/11820/12845/13052/100038882/16419/67374/17304/12828/109711/14114/18133/100952/20312/16410/13612/16000/12527/16779/70549/14118/17387	33	Yes
TM1_MF_GO:0005201	TM1	MF	GO:0005201	extracellular matrix structural constituent	55/686	140/16912	5.12e-40	3.97e-37	3.45e-37	14268/329941/12843/12816/13179/20692/21825/12111/23876/12842/18295/68792/12835/107581/116847/17183/16012/17022/12837/73230/16997/12833/21828/50706/12834/216616/15530/12829/12845/76477/76293/18208/20563/13601/12832/17304/12828/66695/94214/14114/12827/100952/12831/50530/108075/16779/231470/81877/17150/21923/12830/16773/320712/14118/237759	55	Yes
TM1_MF_GO:0005518	TM1	MF	GO:0005518	collagen binding	23/686	70/16912	2.01e-15	2.22e-13	1.93e-13	13179/20692/21825/18542/11568/17022/14733/13038/12833/21828/12834/12845/407800/18590/76477/56693/12406/66695/17131/66180/81877/17534/320712	23	Yes
TM1_MF_GO:0005520	TM1	MF	GO:0005520	insulin-like growth factor binding	11/686	28/16912	5.16e-09	2.5e-07	2.17e-07	16008/56213/16011/16007/16012/22403/16010/14219/18133/16410/50766	11	Yes
TM1_MF_GO:0005539	TM1	MF	GO:0005539	glycosaminoglycan binding	47/686	200/16912	3.73e-23	1.44e-20	1.26e-20	14268/13179/21825/18542/12111/16007/20564/116847/21826/22403/20377/16997/21828/50706/17242/14219/15200/11820/12845/407800/67896/15945/20356/76477/20563/19122/54003/14165/11504/94214/11804/18133/12831/15191/22240/18186/21813/81877/72780/70370/12628/78892/320712/18187/14118/237759/12505	47	Yes
TM1_MF_GO:0008083	TM1	MF	GO:0008083	growth factor activity	28/686	130/16912	2.75e-13	2.01e-11	1.75e-11	20315/18295/20256/17311/18654/22403/21828/216616/17242/14219/15200/21808/110075/21809/18590/12587/21803/54635/14165/14172/14573/18133/15191/14825/16000/66208/21857/15234	28	Yes
TM1_MF_GO:0008201	TM1	MF	GO:0008201	heparin binding	39/686	150/16912	4.16e-21	1.07e-18	9.34e-19	14268/21825/18542/16007/20564/116847/21826/22403/20377/16997/21828/50706/17242/14219/15200/11820/12845/407800/67896/15945/76477/20563/54003/14165/11504/11804/18133/12831/15191/18186/81877/72780/70370/12628/78892/320712/18187/14118/237759	39	Yes
TM1_MF_GO:0008238	TM1	MF	GO:0008238	exopeptidase activity	14/686	87/16912	9.96e-06	0.000275606	0.000239576	55987/11568/13036/56264/242939/13479/11421/54381/13039/74617/19025/72061/64138/17387	14	No
TM1_MF_GO:0015929	TM1	MF	GO:0015929	hexosaminidase activity	5/686	15/16912	0.000231466	0.0038997	0.00338989	15211/83921/27419/15212/14667	5	No
TM1_MF_GO:0016209	TM1	MF	GO:0016209	antioxidant activity	12/686	72/16912	2.97e-05	0.000604803	0.000525737	114886/53381/20657/109815/11758/14778/93684/18477/56615/625249/14871/100503605	12	Yes
TM1_MF_GO:0016684	TM1	MF	GO:0016684	oxidoreductase activity, acting on peroxide as acceptor	10/686	49/16912	2.21e-05	0.00048816	0.000424343	114886/53381/11758/14778/93684/18477/56615/625249/14871/100503605	10	Yes
TM1_MF_GO:0017147	TM1	MF	GO:0017147	Wnt-protein binding	7/686	29/16912	0.000125207	0.00225664	0.00196163	20319/20377/24117/14362/68151/68588/26563	7	Yes
TM1_MF_GO:0019838	TM1	MF	GO:0019838	growth factor binding	33/686	142/16912	1.82e-16	2.35e-14	2.05e-14	16008/12843/56213/16011/21825/12842/68792/16007/16012/22403/14733/16157/232345/16010/16997/12833/14219/235505/21809/72293/18590/16998/18133/16410/12831/50766/18186/21813/246154/108075/19252/18595/16880	33	Yes
TM1_MF_GO:0019955	TM1	MF	GO:0019955	cytokine binding	18/686	134/16912	7.94e-06	0.000236551	0.000205627	21825/16157/232345/235505/12845/21809/12167/16998/18121/12931/16410/21813/246154/108075/16880/12804/22695/12505	18	Yes
TM1_MF_GO:0030020	TM1	MF	GO:0030020	extracellular matrix structural constituent conferring tensile strength	15/686	38/16912	7.39e-12	4.09e-10	3.56e-10	12843/12816/12842/12835/107581/12837/12833/12834/12829/12832/12828/12827/12831/12830/237759	15	Yes
TM1_MF_GO:0030021	TM1	MF	GO:0030021	extracellular matrix structural constituent conferring compression resistance	8/686	12/16912	3.02e-09	1.56e-07	1.35e-07	13179/12111/18295/116847/17022/15530/66695/94214	8	No
TM1_MF_GO:0030414	TM1	MF	GO:0030414	peptidase inhibitor activity	21/686	160/16912	2.08e-06	7.01e-05	6.09e-05	20317/14456/13010/21858/232345/12258/14734/235505/13479/11820/12406/19122/18787/50766/20568/74116/12306/21857/209378/13014/67866	21	Yes
TM1_MF_GO:0030545	TM1	MF	GO:0030545	receptor regulator activity	55/686	439/16912	8.26e-14	7.11e-12	6.18e-12	78896/14456/18619/20315/18295/13616/20256/17311/20319/13640/18654/170458/57266/22403/14313/21828/216616/17242/14219/15200/21808/110075/11820/21809/15945/20356/18590/12587/20563/21803/54635/16854/14165/11601/14172/110454/20346/14573/12931/18133/56811/20312/15191/14825/22411/16000/66208/22418/77125/399558/21857/14118/15234/17319/66102	55	Yes
TM1_MF_GO:0030546	TM1	MF	GO:0030546	signaling receptor activator activity	51/686	403/16912	4.66e-13	2.78e-11	2.41e-11	78896/14456/18619/20315/18295/13616/20256/17311/20319/13640/18654/170458/57266/22403/21828/216616/17242/14219/15200/21808/110075/11820/21809/15945/20356/18590/12587/20563/21803/54635/16854/14165/14172/20346/14573/12931/18133/20312/15191/14825/22411/16000/66208/22418/77125/399558/21857/14118/15234/17319/66102	51	Yes
TM1_MF_GO:0031994	TM1	MF	GO:0031994	insulin-like growth factor I binding	5/686	13/16912	0.000106149	0.00200648	0.00174418	16008/16011/16012/16010/16410	5	No
TM1_MF_GO:0033218	TM1	MF	GO:0033218	amide binding	29/686	353/16912	0.000261918	0.00431887	0.00375426	12759/13010/18708/19035/18162/54409/16431/12955/21808/54598/11421/16432/13039/19122/19038/11787/16835/18830/14230/64294/66913/18552/13033/13167/56615/16803/14862/15481/18035	29	Yes
TM1_MF_GO:0042056	TM1	MF	GO:0042056	chemoattractant activity	9/686	29/16912	1.36e-06	5.02e-05	4.37e-05	18654/11820/15945/16854/14165/20312/22418/15234/17319	9	Yes
TM1_MF_GO:0042277	TM1	MF	GO:0042277	peptide binding	26/686	278/16912	6.84e-05	0.00132605	0.0011527	12759/13010/18708/19035/18162/54409/16431/12955/21808/54598/11421/16432/13039/19122/19038/11787/16835/64294/66913/18552/13033/56615/16803/14862/15481/18035	26	No
TM1_MF_GO:0043236	TM1	MF	GO:0043236	laminin binding	8/686	30/16912	1.86e-05	0.000424509	0.000369013	21825/14733/21828/215798/20563/57764/13601/16854	8	Yes
TM1_MF_GO:0043394	TM1	MF	GO:0043394	proteoglycan binding	11/686	38/16912	2e-07	8.14e-06	7.08e-06	14268/14313/13038/11820/12845/20356/20563/12831/70370/21923/12628	11	Yes
TM1_MF_GO:0043395	TM1	MF	GO:0043395	heparan sulfate proteoglycan binding	7/686	21/16912	1.24e-05	0.000319919	0.000278096	14313/11820/12845/20356/20563/70370/12628	7	No
TM1_MF_GO:0046332	TM1	MF	GO:0046332	SMAD binding	12/686	83/16912	0.000124471	0.00225664	0.00196163	12843/14281/24136/65112/12167/12832/26427/17131/16476/52662/20482/21813	12	Yes
TM1_MF_GO:0048018	TM1	MF	GO:0048018	receptor ligand activity	51/686	398/16912	2.86e-13	2.01e-11	1.75e-11	78896/14456/18619/20315/18295/13616/20256/17311/20319/13640/18654/170458/57266/22403/21828/216616/17242/14219/15200/21808/110075/11820/21809/15945/20356/18590/12587/20563/21803/54635/16854/14165/14172/20346/14573/12931/18133/20312/15191/14825/22411/16000/66208/22418/77125/399558/21857/14118/15234/17319/66102	51	Yes
TM1_MF_GO:0048407	TM1	MF	GO:0048407	platelet-derived growth factor binding	6/686	12/16912	3.27e-06	0.000105473	9.17e-05	12843/12842/12833/18590/12831/18595	6	Yes
TM1_MF_GO:0050431	TM1	MF	GO:0050431	transforming growth factor beta binding	7/686	23/16912	2.43e-05	0.00050942	0.000442824	21825/235505/21809/16998/21813/246154/108075	7	Yes
TM1_MF_GO:0050839	TM1	MF	GO:0050839	cell adhesion molecule binding	44/686	278/16912	7.1e-15	6.88e-13	5.98e-13	14268/13723/223272/21825/20315/23876/107581/16007/23964/21858/12215/22403/67916/12558/21828/50706/14219/11820/12845/13052/100038882/12386/11735/16419/67374/17304/12828/109711/14114/18133/12552/170643/100952/20312/16410/80883/13612/16000/192167/12527/16779/70549/14118/17387	44	Yes
TM1_MF_GO:0050840	TM1	MF	GO:0050840	extracellular matrix binding	15/686	59/16912	8.62e-09	3.93e-07	3.41e-07	13179/20692/21825/12111/16007/14733/21828/215798/20563/57764/13601/16854/94214/16410/12306	15	Yes
TM1_MF_GO:0061134	TM1	MF	GO:0061134	peptidase regulator activity	27/686	198/16912	3.32e-08	1.43e-06	1.24e-06	14268/20317/14456/18542/13010/13036/20319/21858/232345/12258/14734/235505/13479/11820/76477/12406/19122/18787/14114/50766/20568/74116/12306/21857/209378/13014/67866	27	Yes
TM1_MF_GO:0061135	TM1	MF	GO:0061135	endopeptidase regulator activity	20/686	168/16912	1.6e-05	0.000387386	0.000336743	20317/14456/13010/20319/21858/232345/12258/235505/13479/11820/12406/19122/18787/50766/20568/12306/21857/209378/13014/67866	20	Yes
TM1_MF_GO:0070851	TM1	MF	GO:0070851	growth factor receptor binding	17/686	139/16912	4.83e-05	0.000958954	0.00083359	18654/18708/216616/15200/11820/18590/13601/54635/14165/11601/14172/14573/11600/399558/18595/22038/12505	17	No
TM1_MF_GO:1901681	TM1	MF	GO:1901681	sulfur compound binding	46/686	248/16912	2.93e-18	5.67e-16	4.93e-16	14268/21825/18542/16007/20564/116847/21826/22403/14313/20377/16997/21828/50706/17242/14219/15200/11820/12845/407800/67896/15945/20356/76477/20563/54003/14165/11504/11804/18133/12831/15191/22240/18186/81877/72780/21881/70370/12628/13167/56615/78892/320712/18187/14862/14118/237759	46	Yes
TM2_BP_GO:0001101	TM2	BP	GO:0001101	response to acid chemical	17/729	97/17051	6.78e-07	1.52e-05	1.08e-05	12843/107581/12842/17392/18595/17390/71785/12583/20194/14658/12833/54635/16598/12608/18049/12825/22339	17	No
TM2_BP_GO:0001501	TM2	BP	GO:0001501	skeletal system development	73/729	474/17051	6.48e-22	6.43e-19	4.59e-19	12843/20692/11647/16007/21825/14219/12628/20319/12111/216616/12842/30953/15251/232174/17926/18933/13038/218772/14313/20289/15530/22418/20377/19035/18595/110075/17390/18133/21808/18590/18162/17684/22160/20204/21809/21833/27973/15211/17132/20682/14042/102866/18121/231070/12643/12167/16998/14043/54635/12845/16854/14118/21803/14451/12006/17387/15212/21834/13601/17131/80707/14184/17242/18552/71175/124…	73	Yes
TM2_BP_GO:0001502	TM2	BP	GO:0001502	cartilage condensation	6/729	16/17051	3.32e-05	0.000440947	0.000314551	14219/21808/21833/20682/12167/12814	6	No
TM2_BP_GO:0001503	TM2	BP	GO:0001503	ossification	67/729	370/17051	3.33e-24	4.13e-21	2.94e-21	16011/12843/11647/16007/14219/14734/20319/20256/12842/15251/27047/100038882/17926/12609/20289/15530/22418/14758/20377/68713/110075/17390/22160/21833/16478/20682/14042/230587/18121/12167/16998/14043/225998/15081/14362/12845/22057/18605/22411/21803/26427/211401/12006/17387/66695/50766/21834/13601/17131/80707/14184/17242/71175/12608/14200/16193/68010/16905/329628/14560/16477/239405/22339/11732/16449…	67	Yes
TM2_BP_GO:0001558	TM2	BP	GO:0001558	regulation of cell growth	42/729	413/17051	1.84e-07	4.71e-06	3.36e-06	16011/14268/16010/20315/13640/20319/18208/12955/20564/20356/232441/22403/74116/15200/22418/20377/17756/18133/21808/72269/20563/11787/116837/18186/110196/18605/22411/11739/21803/14451/17387/16971/17131/12505/12053/18049/27279/22339/13057/50790/66102/53378	42	Yes
TM2_BP_GO:0001569	TM2	BP	GO:0001569	branching involved in blood vessel morphogenesis	8/729	42/17051	0.00034858	0.00322031	0.00229722	20315/20319/20356/11600/18186/13617/17242/22339	8	Yes
TM2_BP_GO:0001570	TM2	BP	GO:0001570	vasculogenesis	13/729	91/17051	0.000126471	0.00138504	0.000988022	67888/22762/54409/12389/17684/11600/12192/71602/18186/21803/27494/77446/16477	13	Yes
TM2_BP_GO:0001649	TM2	BP	GO:0001649	osteoblast differentiation	34/729	193/17051	1.68e-12	2.13e-10	1.52e-10	16011/16007/20319/12842/17926/12609/20377/110075/22160/16478/20682/230587/18121/12167/225998/15081/14362/22057/22411/26427/12006/50766/80707/12608/14200/16193/68010/16905/14560/16477/239405/22339/16449/20750	34	Yes
TM2_BP_GO:0001654	TM2	BP	GO:0001654	eye development	48/729	385/17051	2.59e-11	2.04e-09	1.46e-09	329941/12628/12955/12215/15251/14107/218772/19378/16917/18595/330222/23928/21808/17684/22160/24136/50530/80837/13078/17132/20682/11826/18081/12288/12167/17150/225998/12837/242022/18186/14238/21803/14451/114142/20482/21834/12831/14184/71175/18516/16476/24063/22339/16449/24064/98711/29876/17300	48	Yes
TM2_BP_GO:0001655	TM2	BP	GO:0001655	urogenital system development	59/729	350/17051	7.91e-20	4.9e-17	3.5e-17	20317/18654/14734/12628/18993/30953/218772/22418/20377/73230/19378/268902/12829/11504/18595/18027/17390/21808/18590/20563/11600/71785/11421/20682/14042/11826/21419/18121/94275/70350/83675/242022/12931/71602/18186/13617/14573/22411/14118/21803/12828/211401/17131/74055/231470/110350/18552/12505/18073/329628/24063/18793/22339/16449/13653/243931/98711/20750/17300	59	Yes
TM2_BP_GO:0001656	TM2	BP	GO:0001656	metanephros development	18/729	83/17051	1.02e-08	3.5e-07	2.5e-07	14734/18993/268902/18595/18590/20563/20682/11826/21419/14573/14118/211401/231470/329628/24063/13653/243931/98711	18	Yes
TM2_BP_GO:0001657	TM2	BP	GO:0001657	ureteric bud development	20/729	96/17051	3.25e-09	1.32e-07	9.43e-08	18654/14734/218772/20377/73230/268902/20563/20682/18121/94275/12931/14573/21803/17131/12505/329628/24063/22339/243931/17300	20	Yes
TM2_BP_GO:0001658	TM2	BP	GO:0001658	branching involved in ureteric bud morphogenesis	10/729	57/17051	0.000133897	0.00145672	0.00103916	18654/14734/20682/18121/94275/14573/21803/12505/329628/22339	10	Yes
TM2_BP_GO:0001666	TM2	BP	GO:0001666	response to hypoxia	24/729	200/17051	5e-06	9.05e-05	6.45e-05	18654/67749/19223/11670/12955/20657/11931/15251/12389/17390/21808/17684/22160/21809/16531/11826/12192/16526/11539/13617/230857/22339/13653/68169	24	Yes
TM2_BP_GO:0001667	TM2	BP	GO:0001667	ameboidal-type cell migration	54/729	417/17051	3.04e-13	4.43e-11	3.16e-11	17311/114886/20317/13616/14268/13179/20692/20315/67916/68792/21825/11475/15507/30953/12215/15251/13036/20356/20971/12558/15200/22418/68813/83397/73230/11819/56332/18133/21808/22160/24136/20563/11600/80837/13078/20682/11826/21983/18787/18186/269608/14573/22411/21803/17886/27494/14389/18704/16410/16476/14645/14089/22339/15370	54	Yes
TM2_BP_GO:0001704	TM2	BP	GO:0001704	formation of primary germ layer	13/729	91/17051	0.000126471	0.00138504	0.000988022	12816/14268/20319/20289/22418/68151/18121/14043/19252/22411/12831/16410/17300	13	Yes
TM2_BP_GO:0001736	TM2	BP	GO:0001736	establishment of planar polarity	10/729	61/17051	0.000239728	0.0023691	0.00169001	14734/20319/22418/20377/69217/14362/14238/22411/329628/59036	10	No
TM2_BP_GO:0001738	TM2	BP	GO:0001738	morphogenesis of a polarized epithelium	12/729	86/17051	0.000285436	0.00273897	0.00195386	14734/20319/14107/22418/20377/69217/14362/14238/22411/329628/11465/59036	12	No
TM2_BP_GO:0001755	TM2	BP	GO:0001755	neural crest cell migration	9/729	56/17051	0.000566898	0.00474004	0.00338132	17311/13616/14268/15251/20356/22160/24136/18186/14573	9	Yes
TM2_BP_GO:0001756	TM2	BP	GO:0001756	somitogenesis	10/729	68/17051	0.000590807	0.00488499	0.00348472	20319/22418/20377/68713/19378/18845/24136/12006/56334/17300	10	Yes
TM2_BP_GO:0001763	TM2	BP	GO:0001763	morphogenesis of a branching structure	36/729	229/17051	1.19e-11	1.05e-09	7.51e-10	18654/20315/14734/20319/13036/20356/20292/22418/20377/18595/18590/20563/11600/57764/20682/14042/18121/94275/18186/13617/14573/21803/17387/12876/17242/20733/12505/16193/329628/24063/21817/239405/22339/24064/98711/29876	36	Yes
TM2_BP_GO:0001764	TM2	BP	GO:0001764	neuron migration	19/729	181/17051	0.000282004	0.00271128	0.0019341	14456/20315/18208/11819/16917/22160/13176/80883/13865/11787/319387/18186/17242/71175/13175/12825/22339/218194/68169	19	No
TM2_BP_GO:0001819	TM2	BP	GO:0001819	positive regulation of cytokine production	33/729	424/17051	0.000693993	0.00563486	0.00401965	12759/21825/15507/12215/18708/15251/50706/20742/11820/22418/83397/77125/16803/22160/17022/13078/20312/20660/18787/22411/21803/16971/17242/12608/14062/77446/16193/12010/71586/13057/13653/17319/17470	33	Yes
TM2_BP_GO:0001822	TM2	BP	GO:0001822	kidney development	54/729	297/17051	8.92e-20	4.92e-17	3.51e-17	18654/14734/12628/18993/30953/218772/22418/20377/73230/268902/12829/11504/18595/21808/18590/20563/11600/71785/11421/20682/14042/11826/21419/18121/94275/70350/83675/242022/12931/71602/18186/13617/14573/22411/14118/21803/12828/211401/17131/74055/231470/110350/18552/12505/18073/329628/24063/22339/16449/13653/243931/98711/20750/17300	54	Yes
TM2_BP_GO:0001823	TM2	BP	GO:0001823	mesonephros development	20/729	99/17051	5.72e-09	2.15e-07	1.53e-07	18654/14734/218772/20377/73230/268902/20563/20682/18121/94275/12931/14573/21803/17131/12505/329628/24063/22339/243931/17300	20	Yes
TM2_BP_GO:0001837	TM2	BP	GO:0001837	epithelial to mesenchymal transition	26/729	145/17051	4.74e-10	2.45e-08	1.75e-08	67888/20319/12842/15251/22418/20377/13876/21808/22160/21809/20682/18121/22411/21803/12006/17131/17242/208177/16193/68010/24063/22339/16449/24064/17300/53378	26	Yes
TM2_BP_GO:0001838	TM2	BP	GO:0001838	embryonic epithelial tube formation	19/729	150/17051	2.22e-05	0.000314921	0.00022465	20319/15251/20971/22418/20377/21808/17684/13800/22160/24136/20682/18121/14362/14573/21803/56334/20733/50768/16911	19	No
TM2_BP_GO:0001841	TM2	BP	GO:0001841	neural tube formation	17/729	130/17051	3.92e-05	0.0005108	0.000364381	20319/15251/20971/22418/20377/21808/17684/13800/22160/24136/18121/14362/21803/56334/20733/50768/16911	17	No
TM2_BP_GO:0001843	TM2	BP	GO:0001843	neural tube closure	16/729	110/17051	1.73e-05	0.000257274	0.000183527	20319/20971/22418/20377/21808/17684/13800/22160/24136/18121/14362/21803/56334/20733/50768/16911	16	No
TM2_BP_GO:0001886	TM2	BP	GO:0001886	endothelial cell morphogenesis	5/729	16/17051	0.000415145	0.00370871	0.00264562	64103/71355/12819/77446/29876	5	No
TM2_BP_GO:0001893	TM2	BP	GO:0001893	maternal placenta development	6/729	29/17051	0.0012226	0.00909342	0.00648683	19223/16157/11819/17684/56334/16477	6	Yes
TM2_BP_GO:0001933	TM2	BP	GO:0001933	negative regulation of protein phosphorylation	33/729	342/17051	1.16e-05	0.000183188	0.000130678	67916/20319/15507/12389/19122/20377/11819/74155/19249/235505/22160/20563/11600/18121/100952/20660/18769/65112/17872/18605/19252/21803/170643/17131/23980/56334/13405/77446/16193/16476/24063/24064/23882	33	Yes
TM2_BP_GO:0001935	TM2	BP	GO:0001935	endothelial cell proliferation	21/729	148/17051	1.33e-06	2.75e-05	1.96e-05	18654/20692/20315/21825/64103/20356/20292/12389/22418/73230/11819/19378/21828/12828/13601/14184/17242/16476/22339/13057/15370	21	Yes
TM2_BP_GO:0001936	TM2	BP	GO:0001936	regulation of endothelial cell proliferation	20/729	133/17051	9.3e-07	1.98e-05	1.41e-05	18654/20692/20315/21825/64103/20356/20292/12389/22418/11819/19378/21828/12828/13601/14184/17242/16476/22339/13057/15370	20	Yes
TM2_BP_GO:0001938	TM2	BP	GO:0001938	positive regulation of endothelial cell proliferation	14/729	90/17051	2.67e-05	0.000367447	0.00026212	18654/20315/20356/20292/12389/22418/21828/13601/14184/17242/16476/22339/13057/15370	14	Yes
TM2_BP_GO:0001952	TM2	BP	GO:0001952	regulation of cell-matrix adhesion	26/729	120/17051	5.56e-12	6e-10	4.28e-10	21825/13640/107581/18708/50706/11815/20971/17926/14758/20194/18081/18787/18186/17387/16971/58859/18552/13405/12053/208177/50768/22339/16449/11465/12361/244895	26	Yes
TM2_BP_GO:0001953	TM2	BP	GO:0001953	negative regulation of cell-matrix adhesion	13/729	38/17051	2.89e-09	1.2e-07	8.58e-08	21825/18708/50706/11815/17926/18787/17387/16971/12053/208177/50768/16449/12361	13	Yes
TM2_BP_GO:0001954	TM2	BP	GO:0001954	positive regulation of cell-matrix adhesion	10/729	58/17051	0.000155682	0.00163979	0.00116975	107581/20971/17926/20194/18081/18186/58859/18552/13405/22339	10	No
TM2_BP_GO:0001958	TM2	BP	GO:0001958	endochondral ossification	7/729	31/17051	0.000271494	0.00263063	0.00187657	11647/12842/20289/15530/14042/17387/17300	7	Yes
TM2_BP_GO:0001974	TM2	BP	GO:0001974	blood vessel remodeling	8/729	51/17051	0.00134082	0.00981092	0.00699866	13876/21808/14042/11548/21817/22339/16449/17300	8	No
TM2_BP_GO:0002040	TM2	BP	GO:0002040	sprouting angiogenesis	18/729	121/17051	3.78e-06	7.17e-05	5.11e-05	18654/68792/21825/20356/54409/73230/20563/11600/80837/18186/26427/16598/18704/18746/672511/14645/22339/15370	18	Yes
TM2_BP_GO:0002053	TM2	BP	GO:0002053	positive regulation of mesenchymal cell proliferation	8/729	36/17051	0.000112086	0.00124121	0.000885419	18933/22418/18590/20204/20682/14451/114142/22339	8	Yes
TM2_BP_GO:0002062	TM2	BP	GO:0002062	chondrocyte differentiation	22/729	101/17051	2.15e-10	1.27e-08	9.08e-09	14219/20319/216616/218772/20289/15530/18133/17132/20682/14042/12167/16998/12845/21803/12006/21834/13601/17131/17242/12406/58250/12814	22	Yes
TM2_BP_GO:0002063	TM2	BP	GO:0002063	chondrocyte development	9/729	29/17051	2.11e-06	4.25e-05	3.03e-05	20319/20682/12845/12006/13601/17131/12406/58250/12814	9	Yes
TM2_BP_GO:0002087	TM2	BP	GO:0002087	regulation of respiratory gaseous exchange by nervous system process	4/729	12/17051	0.00124577	0.00916954	0.00654113	11539/18516/98660/243931	4	No
TM2_BP_GO:0002548	TM2	BP	GO:0002548	monocyte chemotaxis	11/729	53/17051	1.19e-05	0.000187855	0.000134007	20315/11820/20292/15945/18133/20563/20312/16854/18787/19252/17965	11	Yes
TM2_BP_GO:0002683	TM2	BP	GO:0002683	negative regulation of immune system process	42/729	402/17051	8.71e-08	2.35e-06	1.68e-06	17311/56213/20315/21825/56496/15507/18708/11815/14190/20971/232345/19122/20377/77125/18133/12258/21808/21809/20563/11600/12509/20682/16835/242202/100952/83924/20312/16854/11539/19252/14118/21803/17131/17242/12608/12505/12053/12825/17965/65963/17319/17470	42	Yes
TM2_BP_GO:0002685	TM2	BP	GO:0002685	regulation of leukocyte migration	35/729	213/17051	6.31e-12	6.52e-10	4.65e-10	17311/13616/14456/18654/20315/21825/11815/11820/57266/71660/15945/22418/77125/18133/16803/20563/21828/71785/67374/100952/20312/16854/11539/18787/13617/19252/21803/17387/13601/17242/227541/22339/17965/17319/17470	35	Yes
TM2_BP_GO:0002686	TM2	BP	GO:0002686	negative regulation of leukocyte migration	11/729	41/17051	7.9e-07	1.72e-05	1.23e-05	20315/11815/77125/18133/20563/100952/11539/19252/17965/17319/17470	11	Yes
TM2_BP_GO:0002687	TM2	BP	GO:0002687	positive regulation of leukocyte migration	24/729	148/17051	1.74e-08	5.6e-07	3.99e-07	17311/13616/14456/18654/20315/21825/11820/57266/71660/15945/22418/16803/21828/71785/67374/20312/16854/18787/13617/21803/17387/17242/227541/22339	24	Yes
TM2_BP_GO:0002688	TM2	BP	GO:0002688	regulation of leukocyte chemotaxis	23/729	118/17051	8.71e-10	4e-08	2.85e-08	13616/14456/18654/20315/21825/11820/57266/71660/15945/22418/18133/16803/20563/21828/20312/18787/13617/19252/17242/227541/22339/17965/17319	23	Yes
TM2_BP_GO:0002689	TM2	BP	GO:0002689	negative regulation of leukocyte chemotaxis	5/729	17/17051	0.000567543	0.00474004	0.00338132	18133/20563/19252/17965/17319	5	No
TM2_BP_GO:0002690	TM2	BP	GO:0002690	positive regulation of leukocyte chemotaxis	18/729	93/17051	6.62e-08	1.84e-06	1.31e-06	13616/14456/18654/20315/21825/11820/57266/71660/15945/22418/16803/21828/20312/18787/13617/17242/227541/22339	18	Yes
TM2_BP_GO:0002701	TM2	BP	GO:0002701	negative regulation of production of molecular mediator of immune response	7/729	36/17051	0.000715746	0.00576234	0.00411058	77125/21808/21809/11600/21803/17131/12053	7	No
TM2_BP_GO:0002719	TM2	BP	GO:0002719	negative regulation of cytokine production involved in immune response	6/729	23/17051	0.000323337	0.00301524	0.00215093	21808/21809/11600/21803/17131/12053	6	No
TM2_BP_GO:0002790	TM2	BP	GO:0002790	peptide secretion	33/729	410/17051	0.000385704	0.0035304	0.00251842	13616/78896/13640/12215/15251/20377/18133/94353/21808/52377/68151/21809/53322/13121/11826/21419/12288/67389/12845/11539/21803/16971/19285/12876/68428/14062/16193/68581/14645/12361/17470/22249/50790	33	No
TM2_BP_GO:0003002	TM2	BP	GO:0003002	regionalization	31/729	320/17051	1.96e-05	0.000284855	0.000203202	14734/20319/232174/22418/20377/68713/11819/19378/268902/16917/18845/17684/68151/24136/14042/13865/18121/12167/13082/18186/14573/22411/14451/12006/66042/56334/110350/18552/24063/17965/17300	31	Yes
TM2_BP_GO:0003007	TM2	BP	GO:0003007	heart morphogenesis	42/729	256/17051	4.99e-14	8.25e-12	5.89e-12	67888/16007/21825/20319/20564/15251/22762/218772/22418/19378/13876/268902/11504/215798/21808/17684/22160/22003/20563/11600/20682/14042/18121/14362/18186/22411/21803/12006/17131/12831/56334/12876/71175/77446/14200/329628/16476/50768/22339/16449/17300/12814	42	Yes
TM2_BP_GO:0003012	TM2	BP	GO:0003012	muscle system process	40/729	387/17051	2.36e-07	5.82e-06	4.15e-06	16011/13616/14219/11475/11931/54598/11534/17926/107589/12389/74116/68813/74155/20192/24052/22004/12671/22003/11548/16531/242202/12288/109624/12845/11539/110196/238130/13617/14573/11739/17131/230857/14062/13405/60596/16905/56188/98660/13057/243931	40	Yes
TM2_BP_GO:0003013	TM2	BP	GO:0003013	circulatory system process	65/729	490/17051	3.05e-16	1.01e-13	7.21e-14	13616/14456/12843/14219/64817/11475/20657/11931/18708/15251/50706/11820/54409/71660/12389/13052/15200/68813/83397/11819/17390/21808/24052/18162/27360/12671/22003/20563/11600/58861/21833/11421/14042/11548/16531/20525/242202/12288/14043/20312/12845/11539/74617/238130/13617/21803/16971/21834/27494/17131/230857/23980/16598/15937/14062/13405/60596/77446/56188/22339/98660/13057/17319/17300/16790	65	Yes
TM2_BP_GO:0003014	TM2	BP	GO:0003014	renal system process	13/729	107/17051	0.000639302	0.00525096	0.00374579	14456/18162/11421/16531/11826/21419/12288/11539/71602/13617/14062/13057/16790	13	No
TM2_BP_GO:0003015	TM2	BP	GO:0003015	heart process	25/729	222/17051	9.9e-06	0.000161072	0.000114901	13616/14219/11931/18708/12389/13052/15200/21808/24052/12671/22003/21833/11421/14042/11548/242202/12288/14043/11539/21834/17131/23980/13405/56188/98660	25	No
TM2_BP_GO:0003018	TM2	BP	GO:0003018	vascular process in circulatory system	38/729	210/17051	3.33e-14	5.9e-12	4.21e-12	13616/11475/20657/15251/54409/12389/68813/83397/17390/27360/12671/20563/11600/58861/11421/14042/11548/16531/20525/242202/12288/14043/20312/12845/11539/74617/238130/13617/21803/16971/27494/230857/16598/14062/60596/22339/98660/17300	38	Yes
TM2_BP_GO:0003044	TM2	BP	GO:0003044	regulation of systemic arterial blood pressure mediated by a chemical signal	9/729	47/17051	0.000143671	0.00152297	0.00108642	13616/12671/22003/11421/11548/230857/14062/13057/17319	9	No
TM2_BP_GO:0003073	TM2	BP	GO:0003073	regulation of systemic arterial blood pressure	15/729	101/17051	2.45e-05	0.000339447	0.000242146	13616/14456/50706/71660/11819/12671/22003/11421/11548/11539/230857/15937/14062/13057/17319	15	No
TM2_BP_GO:0003084	TM2	BP	GO:0003084	positive regulation of systemic arterial blood pressure	6/729	22/17051	0.000247889	0.00244488	0.00174407	71660/11819/11421/11548/11539/13057	6	No
TM2_BP_GO:0003093	TM2	BP	GO:0003093	regulation of glomerular filtration	4/729	12/17051	0.00124577	0.00916954	0.00654113	14456/11539/14062/13057	4	No
TM2_BP_GO:0003094	TM2	BP	GO:0003094	glomerular filtration	7/729	23/17051	3.41e-05	0.000450156	0.000321121	14456/11826/11539/71602/13617/14062/13057	7	No
TM2_BP_GO:0003128	TM2	BP	GO:0003128	heart field specification	5/729	17/17051	0.000567543	0.00474004	0.00338132	22418/268902/14042/22411/12006	5	No
TM2_BP_GO:0003151	TM2	BP	GO:0003151	outflow tract morphogenesis	19/729	78/17051	4.82e-10	2.47e-08	1.76e-08	21825/20319/15251/22762/218772/22418/268902/21808/17684/22160/18121/14362/18186/22411/71175/16476/22339/16449/17300	19	Yes
TM2_BP_GO:0003156	TM2	BP	GO:0003156	regulation of animal organ formation	6/729	29/17051	0.0012226	0.00909342	0.00648683	22418/268902/17684/14573/22411/24063	6	No
TM2_BP_GO:0003170	TM2	BP	GO:0003170	heart valve development	13/729	57/17051	6.15e-07	1.38e-05	9.85e-06	16007/20564/22762/20289/13876/268902/21808/22160/20563/20682/100952/21803/16449	13	Yes
TM2_BP_GO:0003176	TM2	BP	GO:0003176	aortic valve development	7/729	24/17051	4.64e-05	0.000589519	0.000420535	20564/268902/22160/20563/20682/100952/21803	7	No
TM2_BP_GO:0003179	TM2	BP	GO:0003179	heart valve morphogenesis	13/729	47/17051	5.25e-08	1.51e-06	1.08e-06	16007/20564/22762/20289/13876/268902/21808/22160/20563/20682/100952/21803/16449	13	Yes
TM2_BP_GO:0003180	TM2	BP	GO:0003180	aortic valve morphogenesis	7/729	19/17051	8.15e-06	0.000136992	9.77e-05	20564/268902/22160/20563/20682/100952/21803	7	No
TM2_BP_GO:0003188	TM2	BP	GO:0003188	heart valve formation	5/729	15/17051	0.000295772	0.00279491	0.00199376	22762/20289/13876/22160/20682	5	No
TM2_BP_GO:0003197	TM2	BP	GO:0003197	endocardial cushion development	10/729	47/17051	2.36e-05	0.000330933	0.000236072	67888/21825/13876/268902/21808/17684/22160/20682/18121/16449	10	Yes
TM2_BP_GO:0003205	TM2	BP	GO:0003205	cardiac chamber development	30/729	180/17051	1.43e-10	8.9e-09	6.35e-09	16007/20319/20564/15251/22762/268977/218772/22418/268902/11504/215798/21808/17684/22003/20563/18121/14362/18186/22411/21803/16971/17131/12876/18552/77446/14200/16449/17300/16911/12814	30	Yes
TM2_BP_GO:0003206	TM2	BP	GO:0003206	cardiac chamber morphogenesis	26/729	134/17051	7.71e-11	5.17e-09	3.69e-09	16007/20319/20564/15251/22762/218772/22418/268902/11504/215798/21808/17684/22003/20563/18121/14362/18186/22411/21803/17131/12876/77446/14200/16449/17300/12814	26	Yes
TM2_BP_GO:0003208	TM2	BP	GO:0003208	cardiac ventricle morphogenesis	13/729	70/17051	7.14e-06	0.000122203	8.72e-05	20319/15251/22762/21808/22003/18121/21803/17131/12876/77446/16449/17300/12814	13	Yes
TM2_BP_GO:0003229	TM2	BP	GO:0003229	ventricular cardiac muscle tissue development	9/729	57/17051	0.000648085	0.0053143	0.00379097	22762/21808/22003/18121/21803/17131/77446/17300/12814	9	No
TM2_BP_GO:0003231	TM2	BP	GO:0003231	cardiac ventricle development	23/729	132/17051	8.44e-09	3.01e-07	2.15e-07	16007/20319/20564/15251/22762/268977/22418/268902/21808/17684/22003/20563/18121/14362/22411/21803/17131/12876/77446/16449/17300/16911/12814	23	Yes
TM2_BP_GO:0003279	TM2	BP	GO:0003279	cardiac septum development	20/729	119/17051	1.46e-07	3.88e-06	2.77e-06	16007/20564/22762/268977/218772/22418/268902/21808/17684/20563/18121/14362/18186/22411/16971/17131/18552/77446/16449/16911	20	Yes
TM2_BP_GO:0003281	TM2	BP	GO:0003281	ventricular septum development	15/729	78/17051	8.96e-07	1.92e-05	1.37e-05	16007/20564/22762/268977/22418/268902/21808/17684/20563/18121/14362/22411/17131/77446/16911	15	Yes
TM2_BP_GO:0003382	TM2	BP	GO:0003382	epithelial cell morphogenesis	8/729	46/17051	0.000662896	0.00540892	0.00385848	64103/14107/71355/72333/20733/12819/77446/29876	8	No
TM2_BP_GO:0003401	TM2	BP	GO:0003401	axis elongation	9/729	33/17051	6.95e-06	0.000119329	8.51e-05	20319/22418/20377/20682/22411/21803/24063/24064/98711	9	Yes
TM2_BP_GO:0003416	TM2	BP	GO:0003416	endochondral bone growth	6/729	26/17051	0.000660947	0.00540191	0.00385347	21825/218772/20682/14042/12845/13601	6	No
TM2_BP_GO:0006022	TM2	BP	GO:0006022	aminoglycan metabolic process	18/729	99/17051	1.8e-07	4.62e-06	3.3e-06	13179/12111/56773/94214/83921/11600/12654/15211/209378/14042/14043/80982/21803/15212/12505/58250/17300/68169	18	No
TM2_BP_GO:0006029	TM2	BP	GO:0006029	proteoglycan metabolic process	10/729	73/17051	0.00104255	0.00790839	0.00564148	13179/12111/14733/50786/94214/14042/14043/58250/68169/12814	10	No
TM2_BP_GO:0006721	TM2	BP	GO:0006721	terpenoid metabolic process	9/729	59/17051	0.000838994	0.00654441	0.00466848	232174/71660/19378/13078/19659/13082/110196/208715/98711	9	Yes
TM2_BP_GO:0006816	TM2	BP	GO:0006816	calcium ion transport	34/729	407/17051	0.000158128	0.00166048	0.00118451	14456/20315/14219/11931/54598/54409/107589/12389/19122/15945/319984/20192/21808/58861/338370/11421/320508/12288/22295/20312/80982/16854/18787/13617/21803/170706/213573/14062/13405/18049/16410/98660/12361/13057	34	No
TM2_BP_GO:0006936	TM2	BP	GO:0006936	muscle contraction	30/729	285/17051	5.25e-06	9.41e-05	6.71e-05	13616/14219/11475/11931/54598/107589/12389/68813/20192/24052/22004/12671/22003/11548/16531/242202/12288/109624/12845/11539/238130/13617/14573/17131/14062/13405/60596/56188/98660/243931	30	Yes
TM2_BP_GO:0006937	TM2	BP	GO:0006937	regulation of muscle contraction	19/729	148/17051	1.83e-05	0.000269193	0.00019203	14219/11931/54598/12389/68813/12671/11548/16531/242202/12288/109624/11539/238130/17131/14062/13405/60596/56188/98660	19	No
TM2_BP_GO:0006939	TM2	BP	GO:0006939	smooth muscle contraction	19/729	109/17051	1.65e-07	4.31e-06	3.07e-06	13616/11475/54598/107589/12389/68813/12671/16531/12288/109624/12845/11539/238130/13617/14573/14062/60596/98660/243931	19	No
TM2_BP_GO:0006940	TM2	BP	GO:0006940	regulation of smooth muscle contraction	11/729	65/17051	8.78e-05	0.00102986	0.000734658	54598/12389/68813/12671/16531/109624/11539/238130/14062/60596/98660	11	No
TM2_BP_GO:0006942	TM2	BP	GO:0006942	regulation of striated muscle contraction	11/729	78/17051	0.000461479	0.00402166	0.00286887	14219/11931/12389/11548/242202/12288/11539/17131/13405/56188/98660	11	No
TM2_BP_GO:0007009	TM2	BP	GO:0007009	plasma membrane organization	13/729	116/17051	0.00136776	0.00993481	0.00708704	12759/20742/12389/21808/11735/226101/13196/211401/17886/12831/329628/54670/22038	13	Yes
TM2_BP_GO:0007015	TM2	BP	GO:0007015	actin filament organization	44/729	428/17051	6.85e-08	1.89e-06	1.35e-06	14219/18708/20742/20356/20292/20971/17926/14107/109711/22004/231637/13800/27360/22003/21809/20563/20194/18003/102866/67968/22240/109624/215114/13717/20312/60595/71602/18186/30794/208431/22411/170643/211401/16419/338367/58804/208177/14457/50768/11465/56431/19241/218194/11853	44	Yes
TM2_BP_GO:0007044	TM2	BP	GO:0007044	cell-substrate junction assembly	19/729	92/17051	9.36e-09	3.29e-07	2.35e-07	14268/13640/107581/11815/20971/17926/14758/109711/20194/18186/17387/16971/208177/16410/50768/22339/11465/244895/226519	19	Yes
TM2_BP_GO:0007160	TM2	BP	GO:0007160	cell-matrix adhesion	37/729	211/17051	2e-13	3.11e-11	2.22e-11	14268/223272/21825/13640/14219/107581/18708/50706/11815/20971/17926/14758/109711/20194/12587/18081/100952/18787/18186/17387/16971/16419/81877/58859/18552/13405/12053/208177/16410/18073/50768/12825/22339/16449/11465/12361/244895	37	Yes
TM2_BP_GO:0007162	TM2	BP	GO:0007162	negative regulation of cell adhesion	38/729	286/17051	5.16e-10	2.61e-08	1.86e-08	20315/21825/13640/15507/12842/18708/50706/11815/20356/14190/20971/17926/19122/17390/18845/11600/13078/242202/67374/16777/16854/18787/60595/19252/21803/17387/16971/17131/17242/20733/12608/12505/12053/208177/50768/22339/16449/12361	38	Yes
TM2_BP_GO:0007164	TM2	BP	GO:0007164	establishment of tissue polarity	10/729	62/17051	0.000275052	0.00265268	0.0018923	14734/20319/22418/20377/69217/14362/14238/22411/329628/59036	10	No
TM2_BP_GO:0007178	TM2	BP	GO:0007178	transmembrane receptor protein serine/threonine kinase signaling pathway	56/729	337/17051	1.42e-18	7.03e-16	5.01e-16	56213/12843/67888/16007/21825/14734/20319/20742/268977/12389/14313/20289/22418/20377/108075/73230/68939/110075/18133/21808/235505/17684/21809/15211/14042/21419/18121/12167/16998/100952/14362/20660/12845/65112/22057/14573/14118/21803/66695/50766/16419/20482/17131/66042/14281/68010/16476/14560/15446/24063/12825/17965/58250/13653/24064/53378	56	Yes
TM2_BP_GO:0007179	TM2	BP	GO:0007179	transforming growth factor beta receptor signaling pathway	31/729	171/17051	7.48e-12	7.42e-10	5.3e-10	56213/12843/21825/268977/12389/108075/68939/21808/235505/17684/21809/12167/16998/100952/65112/14573/14118/21803/66695/16419/20482/17131/14281/68010/16476/15446/24063/12825/58250/24064/53378	31	Yes
TM2_BP_GO:0007263	TM2	BP	GO:0007263	nitric oxide mediated signal transduction	8/729	23/17051	2.97e-06	5.76e-05	4.11e-05	21825/17748/242202/60596/17750/19416/22339/68169	8	Yes
TM2_BP_GO:0007264	TM2	BP	GO:0007264	small GTPase mediated signal transduction	33/729	432/17051	0.000954002	0.00732632	0.00522626	17311/12843/18208/232441/12558/17926/21858/68813/21808/20563/80837/53322/226751/11548/18220/18186/238130/13617/269608/27494/74055/58804/14062/12053/18049/77446/16476/24063/50768/12825/24064/53378/11853	33	No
TM2_BP_GO:0007369	TM2	BP	GO:0007369	gastrulation	19/729	165/17051	8.33e-05	0.000988581	0.000705208	12816/14268/67916/20319/20289/22418/20377/68151/14042/18121/14043/19252/22411/27494/12831/208177/16410/59036/17300	19	No
TM2_BP_GO:0007389	TM2	BP	GO:0007389	pattern specification process	36/729	407/17051	3.15e-05	0.000422697	0.000301532	14734/20319/15251/232174/14313/22418/20377/68713/11819/19378/268902/16917/18845/17684/68151/24136/14042/13865/67968/18121/12167/83675/13082/18186/76441/14573/22411/14451/12006/66042/56334/110350/18552/24063/17965/17300	36	Yes
TM2_BP_GO:0007409	TM2	BP	GO:0007409	axonogenesis	46/729	448/17051	3.56e-08	1.08e-06	7.68e-07	13723/14268/20315/13640/11658/18208/23964/12215/20564/20356/11820/12558/22418/17756/268902/18040/18845/21808/12552/17967/13800/24136/11735/13848/18039/20563/13176/80883/14042/14009/11787/18121/12167/226251/16773/18186/14573/14451/16971/20482/14184/13175/18049/22253/27279/22339	46	Yes
TM2_BP_GO:0007411	TM2	BP	GO:0007411	axon guidance	33/729	228/17051	7.89e-10	3.74e-08	2.67e-08	13723/20315/13640/11658/18208/23964/12215/20564/20356/11820/22418/268902/18845/21808/17967/13800/11735/13848/20563/13176/14042/14009/11787/18121/12167/226251/16773/18186/14573/14451/16971/22253/22339	33	Yes
TM2_BP_GO:0007416	TM2	BP	GO:0007416	synapse assembly	20/729	187/17051	0.000152973	0.00161781	0.00115407	64085/68792/13640/18208/18708/21826/11820/14735/12558/22418/330222/242384/19266/21983/14362/246316/319387/219228/396184/53378	20	No
TM2_BP_GO:0007492	TM2	BP	GO:0007492	endoderm development	10/729	67/17051	0.000523618	0.00448648	0.00320045	12816/14268/11600/14042/12192/18121/19252/21803/12831/16410	10	No
TM2_BP_GO:0007517	TM2	BP	GO:0007517	muscle organ development	40/729	315/17051	7.07e-10	3.44e-08	2.45e-08	11906/12955/14733/22762/232174/107589/12389/20289/22418/11819/21808/17684/22160/22003/11600/217082/56312/14009/18121/13717/14362/21803/211401/114142/20482/17131/14281/58859/13405/77446/16193/16905/12825/54720/12224/15370/13653/12804/17300/12814	40	Yes
TM2_BP_GO:0007519	TM2	BP	GO:0007519	skeletal muscle tissue development	19/729	171/17051	0.000134425	0.00145926	0.00104097	14733/232174/12389/20289/11819/17684/22160/217082/56312/13717/21803/114142/20482/14281/13405/54720/12224/15370/13653	19	Yes
TM2_BP_GO:0007548	TM2	BP	GO:0007548	sex differentiation	28/729	255/17051	4.81e-06	8.81e-05	6.29e-05	17311/13134/20319/53381/30953/22762/14313/22418/20377/11504/18595/17390/21808/17684/11600/20682/56312/12167/15081/18787/14238/71175/12608/16410/22339/12804/98711/17300	28	Yes
TM2_BP_GO:0007565	TM2	BP	GO:0007565	female pregnancy	16/729	119/17051	4.67e-05	0.000590764	0.000421424	16011/19223/16157/232345/11819/17390/17684/67968/16777/15081/56334/18552/15446/16477/22339/50790	16	Yes
TM2_BP_GO:0007568	TM2	BP	GO:0007568	aging	20/729	191/17051	0.000203719	0.0020605	0.00146987	78896/12628/116847/11815/11820/20292/12389/19122/77976/17390/17967/22160/12845/18787/66090/12053/16905/76933/12010/17319	20	Yes
TM2_BP_GO:0007611	TM2	BP	GO:0007611	learning or memory	29/729	289/17051	1.88e-05	0.00027475	0.000195994	20317/15251/11820/20292/19122/16917/319984/17967/21833/108012/11548/21983/16835/18121/242202/12288/16777/17159/114142/108073/14667/14266/17242/18049/12010/16476/54720/98660/13653	29	No
TM2_BP_GO:0007614	TM2	BP	GO:0007614	short-term memory	5/729	17/17051	0.000567543	0.00474004	0.00338132	20317/242202/108073/17242/54720	5	No
TM2_BP_GO:0007626	TM2	BP	GO:0007626	locomotory behavior	24/729	240/17051	0.000101734	0.00114967	0.000820119	18619/11906/20315/20363/11820/27386/16917/11804/15211/14658/11548/16531/12288/22295/319387/15212/105171/18049/18516/13014/54720/98660/13653/170719	24	No
TM2_BP_GO:0008015	TM2	BP	GO:0008015	blood circulation	61/729	462/17051	3.29e-15	6.8e-13	4.85e-13	13616/14456/12843/14219/11475/20657/11931/18708/15251/50706/11820/54409/71660/12389/13052/15200/68813/83397/11819/17390/21808/24052/18162/27360/12671/22003/20563/11600/58861/21833/11421/14042/11548/16531/242202/12288/14043/20312/12845/11539/74617/238130/13617/21803/21834/27494/17131/230857/23980/16598/15937/14062/13405/60596/56188/22339/98660/13057/17319/17300/16790	61	Yes
TM2_BP_GO:0008016	TM2	BP	GO:0008016	regulation of heart contraction	21/729	174/17051	1.76e-05	0.000260995	0.000186182	13616/14219/11931/18708/12389/13052/15200/21808/12671/22003/21833/11548/242202/12288/11539/21834/17131/23980/13405/56188/98660	21	No
TM2_BP_GO:0008038	TM2	BP	GO:0008038	neuron recognition	9/729	51/17051	0.000275374	0.00265268	0.0018923	13723/12215/20356/11820/22418/268902/17967/14042/18186	9	Yes
TM2_BP_GO:0008217	TM2	BP	GO:0008217	regulation of blood pressure	27/729	182/17051	1.61e-08	5.29e-07	3.77e-07	13616/14456/12843/11475/18708/50706/54409/71660/11819/18162/12671/22003/11421/14042/11548/12288/14043/11539/74617/230857/15937/14062/60596/98660/13057/17319/16790	27	Yes
TM2_BP_GO:0008344	TM2	BP	GO:0008344	adult locomotory behavior	12/729	102/17051	0.0013555	0.00986016	0.00703378	20315/11820/15211/14658/16531/12288/22295/18049/18516/13014/98660/170719	12	No
TM2_BP_GO:0008406	TM2	BP	GO:0008406	gonad development	24/729	206/17051	8.33e-06	0.000139543	9.95e-05	17311/20319/53381/30953/22762/14313/22418/20377/11504/18595/17390/21808/17684/11600/20682/56312/12167/15081/18787/12608/16410/22339/98711/17300	24	Yes
TM2_BP_GO:0008543	TM2	BP	GO:0008543	fibroblast growth factor receptor signaling pathway	12/729	72/17051	4.95e-05	0.000619231	0.000441731	21825/14219/14733/22418/14042/18121/26427/14184/396184/329628/24063/24064	12	Yes
TM2_BP_GO:0008585	TM2	BP	GO:0008585	female gonad development	15/729	106/17051	4.38e-05	0.000562899	0.000401546	17311/30953/22762/14313/20377/11504/18595/17390/11600/56312/12167/18787/12608/22339/17300	15	Yes
TM2_BP_GO:0008625	TM2	BP	GO:0008625	extrinsic apoptotic signaling pathway via death domain receptors	11/729	74/17051	0.000289439	0.00276136	0.00196983	21825/20319/18708/20377/21859/12167/16854/18787/20482/29810/18049	11	No
TM2_BP_GO:0008630	TM2	BP	GO:0008630	intrinsic apoptotic signaling pathway in response to DNA damage	13/729	109/17051	0.000763303	0.0060685	0.00432899	12759/20315/18708/22070/56312/20482/15937/68428/12505/12925/22038/17319/18950	13	No
TM2_BP_GO:0009611	TM2	BP	GO:0009611	response to wounding	59/729	460/17051	3.52e-14	6.02e-12	4.29e-12	78896/14268/14456/67916/16007/21825/12628/11475/12842/17183/15251/20971/107589/12389/13052/15200/22418/18595/12496/17390/12258/21808/18590/235505/22003/18039/27973/14042/11826/12192/18121/22240/226101/20312/12845/12798/18787/14573/21803/16971/17886/12831/14184/17242/19128/14062/12505/208177/16193/16476/27279/12825/12193/22339/19716/11465/12361/17319/68169	59	Yes
TM2_BP_GO:0009612	TM2	BP	GO:0009612	response to mechanical stimulus	22/729	145/17051	2.29e-07	5.67e-06	4.04e-06	20315/21825/12842/12389/20289/17390/14823/20682/11826/14009/12798/13617/22411/114142/20744/14281/29810/17242/13405/16476/98660/12814	22	Yes
TM2_BP_GO:0010035	TM2	BP	GO:0010035	response to inorganic substance	36/729	441/17051	0.000161798	0.00168985	0.00120546	14268/21825/23876/12955/20657/11820/107589/12389/19122/17748/17390/17967/11735/18039/13078/16478/16531/11826/66871/12870/114679/69048/14282/14590/14281/16193/17750/18477/12010/16410/16476/16477/12925/15370/22038/29876	36	Yes
TM2_BP_GO:0010038	TM2	BP	GO:0010038	response to metal ion	26/729	268/17051	8.8e-05	0.00102986	0.000734658	14268/21825/20657/11820/107589/12389/19122/17748/17967/11735/16478/16531/11826/66871/12870/69048/14282/14590/14281/17750/12010/16476/16477/12925/22038/29876	26	Yes
TM2_BP_GO:0010092	TM2	BP	GO:0010092	specification of animal organ identity	7/729	36/17051	0.000715746	0.00576234	0.00411058	22418/268902/14042/14573/22411/12006/24063	7	No
TM2_BP_GO:0010171	TM2	BP	GO:0010171	body morphogenesis	13/729	61/17051	1.41e-06	2.9e-05	2.07e-05	14734/12842/30953/20289/18595/17390/21808/21809/78892/18121/21803/71175/208177	13	No
TM2_BP_GO:0010463	TM2	BP	GO:0010463	mesenchymal cell proliferation	12/729	54/17051	2.24e-06	4.46e-05	3.18e-05	14734/18933/22418/18590/20204/20682/22411/14451/114142/16905/329628/22339	12	Yes
TM2_BP_GO:0010464	TM2	BP	GO:0010464	regulation of mesenchymal cell proliferation	10/729	44/17051	1.27e-05	0.000197008	0.000140537	18933/22418/18590/20204/20682/22411/14451/114142/16905/22339	10	Yes
TM2_BP_GO:0010466	TM2	BP	GO:0010466	negative regulation of peptidase activity	31/729	190/17051	1.23e-10	7.74e-09	5.52e-09	20317/14456/21825/14734/20319/12955/13010/11820/74116/21858/232345/12258/235505/13479/209378/21859/11826/20660/18787/13601/23980/20733/12505/18049/16193/68581/12406/13014/18793/22339/15370	31	Yes
TM2_BP_GO:0010561	TM2	BP	GO:0010561	negative regulation of glycoprotein biosynthetic process	5/729	15/17051	0.000295772	0.00279491	0.00199376	15200/56374/16431/56175/64294	5	No
TM2_BP_GO:0010563	TM2	BP	GO:0010563	negative regulation of phosphorus metabolic process	40/729	487/17051	6.22e-05	0.000758351	0.000540972	67916/20319/15507/12389/19122/20377/11819/74155/21808/72269/18590/19249/235505/22160/20563/11600/56312/18121/100952/20660/18769/65112/17872/18605/19252/21803/170643/17131/338367/23980/15937/56334/14783/13405/77446/16193/16476/24063/24064/23882	40	No
TM2_BP_GO:0010594	TM2	BP	GO:0010594	regulation of endothelial cell migration	22/729	160/17051	1.28e-06	2.68e-05	1.91e-05	20317/13179/20692/67916/68792/21825/15507/12215/15251/20356/22418/73230/11819/20563/11600/80837/18186/21803/27494/18704/14645/22339	22	Yes
TM2_BP_GO:0010595	TM2	BP	GO:0010595	positive regulation of endothelial cell migration	16/729	104/17051	8.35e-06	0.000139543	9.95e-05	20692/67916/68792/21825/15507/12215/15251/20356/22418/11600/80837/18186/21803/27494/18704/22339	16	Yes
TM2_BP_GO:0010631	TM2	BP	GO:0010631	epithelial cell migration	39/729	290/17051	2.12e-10	1.27e-08	9.08e-09	20317/13179/20692/67916/68792/21825/15507/12215/15251/13036/20356/15200/22418/68813/73230/11819/18133/21808/24136/20563/11600/80837/13078/20682/11826/18787/18186/269608/21803/17886/27494/14389/18704/16410/16476/14645/14089/22339/15370	39	Yes
TM2_BP_GO:0010632	TM2	BP	GO:0010632	regulation of epithelial cell migration	31/729	226/17051	9.57e-09	3.32e-07	2.37e-07	20317/13179/20692/67916/68792/21825/15507/12215/15251/13036/20356/15200/22418/68813/73230/11819/21808/20563/11600/80837/20682/11826/18787/18186/21803/27494/14389/18704/16476/14645/22339	31	Yes
TM2_BP_GO:0010634	TM2	BP	GO:0010634	positive regulation of epithelial cell migration	25/729	150/17051	4.92e-09	1.89e-07	1.35e-07	20692/67916/68792/21825/15507/12215/15251/13036/20356/15200/22418/68813/21808/11600/80837/20682/11826/18787/18186/21803/27494/14389/18704/16476/22339	25	Yes
TM2_BP_GO:0010712	TM2	BP	GO:0010712	regulation of collagen metabolic process	16/729	53/17051	3.58e-10	1.95e-08	1.39e-08	114886/14268/14219/268977/20289/74155/21809/76293/100952/18787/21803/26427/14184/14062/16193/14089	16	Yes
TM2_BP_GO:0010713	TM2	BP	GO:0010713	negative regulation of collagen metabolic process	5/729	16/17051	0.000415145	0.00370871	0.00264562	114886/14268/74155/100952/16193	5	No
TM2_BP_GO:0010714	TM2	BP	GO:0010714	positive regulation of collagen metabolic process	8/729	33/17051	5.76e-05	0.000707446	0.000504659	14219/268977/20289/21809/18787/21803/26427/14062	8	Yes
TM2_BP_GO:0010717	TM2	BP	GO:0010717	regulation of epithelial to mesenchymal transition	20/729	94/17051	2.2e-09	9.42e-08	6.72e-08	20319/12842/20377/21808/22160/21809/18121/21803/12006/17131/17242/208177/16193/68010/24063/22339/16449/24064/17300/53378	20	Yes
TM2_BP_GO:0010718	TM2	BP	GO:0010718	positive regulation of epithelial to mesenchymal transition	12/729	47/17051	4.49e-07	1.04e-05	7.42e-06	12842/21808/22160/21809/21803/12006/17242/16193/68010/16449/17300/53378	12	No
TM2_BP_GO:0010719	TM2	BP	GO:0010719	negative regulation of epithelial to mesenchymal transition	7/729	35/17051	0.000598368	0.00493927	0.00352345	20319/20377/21808/18121/24063/22339/24064	7	No
TM2_BP_GO:0010720	TM2	BP	GO:0010720	positive regulation of cell development	33/729	342/17051	1.16e-05	0.000183188	0.000130678	20317/14268/20315/13640/18208/15251/20356/17926/68813/268902/77125/18845/19266/24136/18039/20194/11421/18003/18121/242202/20312/18186/21803/16971/20482/17131/17242/18049/16193/27279/22339/19716/12361	33	No
TM2_BP_GO:0010721	TM2	BP	GO:0010721	negative regulation of cell development	20/729	196/17051	0.000287523	0.00275367	0.00196434	13640/18208/50706/20356/20292/22418/17756/20563/16835/18121/20660/60595/18186/76441/14118/21803/14184/12010/22339/17190	20	Yes
TM2_BP_GO:0010749	TM2	BP	GO:0010749	regulation of nitric oxide mediated signal transduction	4/729	11/17051	0.000859458	0.00666215	0.00475247	21825/242202/60596/22339	4	No
TM2_BP_GO:0010810	TM2	BP	GO:0010810	regulation of cell-substrate adhesion	43/729	216/17051	1.69e-17	7.63e-15	5.44e-15	14268/16007/21825/13640/107581/12842/18708/50706/11815/20971/17926/13612/68813/14758/54156/94214/20194/18003/407800/18081/100952/12837/18787/60595/18186/17387/16971/58859/17242/18552/13405/12053/208177/320712/18073/50768/22339/16449/11465/12361/244895/20750/68169	43	Yes
TM2_BP_GO:0010811	TM2	BP	GO:0010811	positive regulation of cell-substrate adhesion	26/729	131/17051	4.53e-11	3.17e-09	2.26e-09	14268/16007/21825/107581/20971/17926/13612/68813/54156/94214/20194/18003/407800/18081/100952/12837/18186/58859/17242/18552/13405/320712/18073/22339/20750/68169	26	Yes
TM2_BP_GO:0010812	TM2	BP	GO:0010812	negative regulation of cell-substrate adhesion	16/729	61/17051	3.55e-09	1.42e-07	1.01e-07	21825/13640/12842/18708/50706/11815/17926/18787/60595/17387/16971/12053/208177/50768/16449/12361	16	Yes
TM2_BP_GO:0010817	TM2	BP	GO:0010817	regulation of hormone levels	38/729	492/17051	0.000327546	0.0030487	0.0021748	13616/78896/13640/30953/15251/232174/13038/20377/108075/19378/12971/18595/18133/94353/13078/53322/11421/16531/11826/21419/12288/12167/67389/114679/11539/19659/13082/16971/230857/12876/18552/16193/14645/12361/13653/50790/98711/20750	38	No
TM2_BP_GO:0010934	TM2	BP	GO:0010934	macrophage cytokine production	5/729	18/17051	0.000758363	0.00603891	0.00430788	14456/22418/21808/21809/21803	5	No
TM2_BP_GO:0010951	TM2	BP	GO:0010951	negative regulation of endopeptidase activity	19/729	142/17051	1e-05	0.000162749	0.000116097	20317/14456/21825/20319/12955/21858/12258/13479/21859/11826/20660/18787/12505/16193/68581/12406/18793/22339/15370	19	No
TM2_BP_GO:0010959	TM2	BP	GO:0010959	regulation of metal ion transport	26/729	281/17051	0.000189735	0.00194078	0.00138446	20315/11931/107589/12389/19122/15945/319984/21808/11421/12288/20312/80982/16854/11932/18787/13617/21803/18704/213573/14062/13405/18049/56188/98660/12361/13057	26	No
TM2_BP_GO:0010976	TM2	BP	GO:0010976	positive regulation of neuron projection development	21/729	217/17051	0.000421342	0.00375274	0.00267703	20317/15507/22418/11504/13176/22240/26563/14362/20312/11932/242274/16971/17242/13405/18049/16193/227541/12361/17319/12492/68169	21	No
TM2_BP_GO:0014020	TM2	BP	GO:0014020	primary neural tube formation	17/729	117/17051	9.66e-06	0.000158707	0.000113214	20319/15251/20971/22418/20377/21808/17684/13800/22160/24136/18121/14362/21803/56334/20733/50768/16911	17	No
TM2_BP_GO:0014031	TM2	BP	GO:0014031	mesenchymal cell development	18/729	86/17051	1.84e-08	5.81e-07	4.14e-07	17311/13616/14268/15251/20356/12558/19378/17684/22160/24136/20682/13082/18186/13617/14573/16449/98711/17300	18	Yes
TM2_BP_GO:0014032	TM2	BP	GO:0014032	neural crest cell development	18/729	81/17051	6.72e-09	2.44e-07	1.74e-07	17311/13616/14268/15251/20356/12558/19378/17684/22160/24136/20682/13082/18186/13617/14573/16449/98711/17300	18	Yes
TM2_BP_GO:0014033	TM2	BP	GO:0014033	neural crest cell differentiation	20/729	89/17051	7.91e-10	3.74e-08	2.67e-08	17311/13616/14268/15251/20356/12558/20377/19378/17684/22160/24136/20682/14042/13082/18186/13617/14573/16449/98711/17300	20	Yes
TM2_BP_GO:0014065	TM2	BP	GO:0014065	phosphatidylinositol 3-kinase signaling	17/729	132/17051	4.78e-05	0.000603227	0.000430315	14268/13179/18708/17926/21808/18590/19249/22160/11600/71785/20682/12192/26563/54635/18704/14062/22339	17	No
TM2_BP_GO:0014066	TM2	BP	GO:0014066	regulation of phosphatidylinositol 3-kinase signaling	14/729	100/17051	8.8e-05	0.00102986	0.000734658	14268/13179/17926/21808/18590/19249/22160/11600/71785/20682/26563/54635/14062/22339	14	No
TM2_BP_GO:0014068	TM2	BP	GO:0014068	positive regulation of phosphatidylinositol 3-kinase signaling	12/729	76/17051	8.55e-05	0.00100759	0.000718766	14268/13179/17926/21808/18590/11600/71785/20682/26563/54635/14062/22339	12	No
TM2_BP_GO:0014706	TM2	BP	GO:0014706	striated muscle tissue development	44/729	409/17051	1.8e-08	5.72e-07	4.08e-07	14733/22762/232174/12389/74116/13052/218772/20289/15530/22418/11819/19378/18595/21808/24052/17967/17684/22160/22003/11600/217082/11548/56312/16526/18121/13717/110196/11739/21803/114142/20482/17131/14281/13405/77446/14200/16905/22339/54720/12224/15370/13653/17300/12814	44	Yes
TM2_BP_GO:0014812	TM2	BP	GO:0014812	muscle cell migration	22/729	110/17051	1.21e-09	5.32e-08	3.8e-08	16011/50706/68813/11504/18133/18590/231637/20563/13078/21828/71785/11421/20660/18787/238130/16971/14783/17242/18552/19241/13653/17319	22	No
TM2_BP_GO:0014829	TM2	BP	GO:0014829	vascular associated smooth muscle contraction	7/729	29/17051	0.000173607	0.00179057	0.00127731	13616/11475/68813/12671/12845/238130/13617	7	No
TM2_BP_GO:0014896	TM2	BP	GO:0014896	muscle hypertrophy	12/729	102/17051	0.0013555	0.00986016	0.00703378	16011/11534/17926/74116/74155/11548/242202/110196/11739/230857/16905/13057	12	No
TM2_BP_GO:0014909	TM2	BP	GO:0014909	smooth muscle cell migration	21/729	97/17051	6.23e-10	3.06e-08	2.18e-08	16011/50706/68813/11504/18133/18590/231637/20563/13078/71785/11421/20660/18787/238130/16971/14783/17242/18552/19241/13653/17319	21	No
TM2_BP_GO:0014910	TM2	BP	GO:0014910	regulation of smooth muscle cell migration	19/729	89/17051	5.23e-09	2e-07	1.42e-07	16011/50706/68813/11504/18590/231637/20563/13078/71785/11421/20660/18787/238130/16971/17242/18552/19241/13653/17319	19	No
TM2_BP_GO:0014911	TM2	BP	GO:0014911	positive regulation of smooth muscle cell migration	14/729	61/17051	2.09e-07	5.25e-06	3.74e-06	16011/50706/68813/11504/231637/13078/71785/238130/16971/17242/18552/19241/13653/17319	14	No
TM2_BP_GO:0016049	TM2	BP	GO:0016049	cell growth	50/729	492/17051	1.25e-08	4.28e-07	3.05e-07	16011/14268/16010/20315/13640/20319/18208/12955/20564/50706/20356/11820/232441/22403/74116/15200/22418/20377/17756/18133/21808/72269/24136/21809/20563/20682/11548/11787/116837/18186/110196/18605/22411/11739/21803/14451/17387/16971/17131/13175/12505/12053/18049/396184/27279/22339/13057/50790/66102/53378	50	Yes
TM2_BP_GO:0016055	TM2	BP	GO:0016055	Wnt signaling pathway	45/729	405/17051	4.55e-09	1.79e-07	1.28e-07	67916/14734/20319/12842/20356/11820/14735/12558/17926/207181/12389/22418/20377/56332/24117/242939/72293/56811/68151/24136/21833/20682/14042/69217/18121/26563/14362/83675/76441/22411/21803/12006/16971/66042/80707/12876/14783/14184/17242/12505/672511/68010/239405/59036/13653	45	Yes
TM2_BP_GO:0016114	TM2	BP	GO:0016114	terpenoid biosynthetic process	5/729	15/17051	0.000295772	0.00279491	0.00199376	19378/19659/110196/208715/98711	5	No
TM2_BP_GO:0016331	TM2	BP	GO:0016331	morphogenesis of embryonic epithelium	21/729	177/17051	2.29e-05	0.000323335	0.000230652	20319/15251/20971/22418/20377/19378/21808/17684/13800/22160/24136/20682/18121/14362/14573/21803/56334/20733/50768/98711/16911	21	No
TM2_BP_GO:0016525	TM2	BP	GO:0016525	negative regulation of angiogenesis	21/729	106/17051	3.45e-09	1.39e-07	9.94e-08	20317/13179/20692/21825/23876/64103/21826/15945/11504/21808/12509/100952/18787/12828/26427/27494/16598/12827/21413/24064/17300	21	Yes
TM2_BP_GO:0017015	TM2	BP	GO:0017015	regulation of transforming growth factor beta receptor signaling pathway	20/729	112/17051	5.15e-08	1.5e-06	1.07e-06	56213/21825/268977/12389/68939/235505/17684/21809/100952/65112/14118/21803/66695/20482/17131/68010/24063/58250/24064/53378	20	Yes
TM2_BP_GO:0018108	TM2	BP	GO:0018108	peptidyl-tyrosine phosphorylation	31/729	310/17051	1.05e-05	0.000168533	0.000120224	17311/14456/67916/13640/20319/216616/11820/12389/15200/19122/20377/18595/11804/74155/18590/11600/21828/71785/11421/18003/54635/12931/11539/18186/14573/21803/14184/12505/16193/22339/17319	31	Yes
TM2_BP_GO:0018149	TM2	BP	GO:0018149	peptide cross-linking	8/729	25/17051	6.08e-06	0.000105836	7.55e-05	14268/13179/21825/12111/94214/12825/21817/68169	8	Yes
TM2_BP_GO:0018212	TM2	BP	GO:0018212	peptidyl-tyrosine modification	31/729	313/17051	1.27e-05	0.000197008	0.000140537	17311/14456/67916/13640/20319/216616/11820/12389/15200/19122/20377/18595/11804/74155/18590/11600/21828/71785/11421/18003/54635/12931/11539/18186/14573/21803/14184/12505/16193/22339/17319	31	Yes
TM2_BP_GO:0019221	TM2	BP	GO:0019221	cytokine-mediated signaling pathway	27/729	337/17051	0.00135303	0.00986016	0.00703378	14456/20315/66141/16157/20564/15251/20292/12389/15945/22418/68713/77125/14825/20563/11600/14042/20312/12931/60595/13601/16193/16880/15944/74186/13653/12804/17300	27	Yes
TM2_BP_GO:0019229	TM2	BP	GO:0019229	regulation of vasoconstriction	15/729	77/17051	7.53e-07	1.65e-05	1.18e-05	13616/15251/12389/68813/17390/27360/12671/58861/11548/242202/12288/20312/238130/14062/98660	15	No
TM2_BP_GO:0019511	TM2	BP	GO:0019511	peptidyl-proline hydroxylation	4/729	12/17051	0.00124577	0.00916954	0.00654113	53381/56693/18452/18451	4	No
TM2_BP_GO:0019932	TM2	BP	GO:0019932	second-messenger-mediated signaling	27/729	297/17051	0.000192133	0.00196126	0.00139907	13616/67888/21825/23964/11931/11820/19122/17748/215798/24052/17967/12671/53322/20682/11826/54446/242202/230857/23980/13405/60596/14200/17750/19416/22339/54720/68169	27	No
TM2_BP_GO:0021915	TM2	BP	GO:0021915	neural tube development	22/729	185/17051	1.42e-05	0.000219128	0.000156316	20319/15251/20971/22418/20377/19378/18845/21808/17684/13800/22160/24136/12192/18121/14362/21803/14451/56334/20733/50768/59036/16911	22	No
TM2_BP_GO:0021952	TM2	BP	GO:0021952	central nervous system projection neuron axonogenesis	6/729	29/17051	0.0012226	0.00909342	0.00648683	12552/24136/13848/20563/13176/13175	6	No
TM2_BP_GO:0021954	TM2	BP	GO:0021954	central nervous system neuron development	12/729	96/17051	0.000790763	0.00624677	0.00445616	22418/17756/268902/16917/12552/24136/13848/20563/13176/18186/13175/68169	12	No
TM2_BP_GO:0022407	TM2	BP	GO:0022407	regulation of cell-cell adhesion	33/729	416/17051	0.000498547	0.00428647	0.00305777	16008/20315/67916/13640/15507/18708/11534/14190/20971/12389/19122/14924/22418/17684/11735/13848/54446/242202/20312/16854/21803/17131/17242/20733/12608/12505/12053/16193/18793/22339/16449/80859/18950	33	No
TM2_BP_GO:0022604	TM2	BP	GO:0022604	regulation of cell morphogenesis	30/729	322/17051	5.53e-05	0.000683559	0.000487619	14268/20692/13640/50706/20292/17926/22418/68813/18845/19266/80837/20194/18003/80883/116837/60595/18186/17886/15212/58804/17242/13822/12505/16193/14457/68010/50768/22339/12361/11853	30	Yes
TM2_BP_GO:0022612	TM2	BP	GO:0022612	gland morphogenesis	20/729	147/17051	4.56e-06	8.47e-05	6.04e-05	16011/18208/20292/12389/22418/20377/17390/18590/20563/57764/20682/18121/18186/21803/66042/17242/12608/12505/16193/21817	20	Yes
TM2_BP_GO:0030001	TM2	BP	GO:0030001	metal ion transport	40/729	484/17051	5.43e-05	0.000673542	0.000480474	14456/20315/14219/11931/54598/54409/107589/12389/19122/15945/319984/20192/21808/58861/338370/11421/320508/12288/240776/22295/20312/80982/16854/11932/18787/69048/13617/21803/170706/18704/213573/14062/13405/18049/16410/56188/54403/98660/12361/13057	40	No
TM2_BP_GO:0030038	TM2	BP	GO:0030038	contractile actin filament bundle assembly	17/729	111/17051	4.68e-06	8.63e-05	6.15e-05	14219/18708/20971/17926/22003/21809/20194/13717/18186/30794/22411/16419/208177/50768/11465/218194/11853	17	No
TM2_BP_GO:0030099	TM2	BP	GO:0030099	myeloid cell differentiation	30/729	388/17051	0.00132171	0.0096854	0.00690912	17311/14734/18708/15251/11820/100038882/20377/109711/235505/17684/21833/12192/17150/83924/19659/14118/21803/17886/16598/14389/14281/14184/12608/12053/12010/16476/16477/22339/16449/22038	30	Yes
TM2_BP_GO:0030111	TM2	BP	GO:0030111	regulation of Wnt signaling pathway	37/729	298/17051	5.76e-09	2.15e-07	1.53e-07	67916/14734/20319/12842/20356/11820/12558/207181/12389/22418/20377/24117/72293/56811/68151/24136/21833/20682/69217/18121/14362/83675/76441/22411/21803/12006/16971/66042/80707/14783/14184/17242/672511/68010/239405/59036/13653	37	Yes
TM2_BP_GO:0030177	TM2	BP	GO:0030177	positive regulation of Wnt signaling pathway	18/729	134/17051	1.62e-05	0.000243183	0.000173476	14734/20319/12842/20356/12389/22418/20377/56811/68151/24136/21833/69217/76441/21803/14184/68010/239405/59036	18	Yes
TM2_BP_GO:0030178	TM2	BP	GO:0030178	negative regulation of Wnt signaling pathway	25/729	157/17051	1.28e-08	4.36e-07	3.11e-07	14734/20319/11820/12558/207181/12389/22418/20377/24117/72293/56811/20682/18121/14362/83675/22411/12006/16971/66042/80707/14783/17242/672511/59036/13653	25	Yes
TM2_BP_GO:0030193	TM2	BP	GO:0030193	regulation of blood coagulation	9/729	61/17051	0.00107328	0.00810431	0.00578124	21825/12389/18595/12258/18590/27973/18787/19128/14062	9	Yes
TM2_BP_GO:0030198	TM2	BP	GO:0030198	extracellular matrix organization	80/729	292/17051	1.66e-42	3.62e-39	2.58e-39	329941/14268/12843/16007/23876/14219/20319/107581/11568/12842/53381/50706/20356/11820/54409/12389/16949/269959/17392/20289/15530/14758/108075/12829/16917/11504/18595/11804/17390/21808/54156/94214/207596/56693/17022/13078/57764/12587/78892/80883/20682/407800/14042/11787/16777/16998/76293/100952/13717/12837/71355/77739/12845/16854/71602/26561/14238/21803/12828/26427/17387/18451/81877/12831/12827/58…	80	Yes
TM2_BP_GO:0030199	TM2	BP	GO:0030199	collagen fibril organization	22/729	57/17051	4.74e-16	1.38e-13	9.86e-14	12843/20319/11568/12842/16949/20289/16917/21808/56693/17022/13078/14042/100952/12845/18451/81877/12831/58859/12406/12825/17300/12814	22	Yes
TM2_BP_GO:0030203	TM2	BP	GO:0030203	glycosaminoglycan metabolic process	17/729	81/17051	4.37e-08	1.28e-06	9.1e-07	13179/12111/56773/94214/83921/11600/15211/209378/14042/14043/80982/21803/15212/12505/58250/17300/68169	17	No
TM2_BP_GO:0030204	TM2	BP	GO:0030204	chondroitin sulfate metabolic process	6/729	25/17051	0.000527305	0.00449631	0.00320746	13179/12111/94214/14042/58250/68169	6	No
TM2_BP_GO:0030278	TM2	BP	GO:0030278	regulation of ossification	22/729	127/17051	1.99e-08	6.23e-07	4.45e-07	16007/15251/27047/100038882/22418/14758/20377/22160/20682/12167/16998/12845/18605/21803/26427/21834/13601/17131/14184/17242/71175/11732	22	Yes
TM2_BP_GO:0030279	TM2	BP	GO:0030279	negative regulation of ossification	9/729	40/17051	3.77e-05	0.000491912	0.000350907	15251/20377/20682/16998/18605/21803/13601/17131/17242	9	No
TM2_BP_GO:0030282	TM2	BP	GO:0030282	bone mineralization	21/729	115/17051	1.59e-08	5.25e-07	3.75e-07	12843/16007/14734/15251/27047/100038882/14758/22160/20682/12167/16998/12845/18605/22411/211401/12006/66695/13601/14184/239405/11732	21	Yes
TM2_BP_GO:0030307	TM2	BP	GO:0030307	positive regulation of cell growth	23/729	179/17051	2.44e-06	4.85e-05	3.46e-05	14268/20315/13640/20319/18208/20356/15200/20377/21808/116837/18186/110196/11739/17387/16971/17131/18049/27279/22339/13057/50790/66102/53378	23	Yes
TM2_BP_GO:0030308	TM2	BP	GO:0030308	negative regulation of cell growth	21/729	194/17051	8.89e-05	0.00103731	0.000739971	20319/18208/12955/20564/20356/232441/74116/22418/20377/17756/18133/21808/72269/20563/11787/18186/18605/22411/21803/14451/12053	21	No
TM2_BP_GO:0030323	TM2	BP	GO:0030323	respiratory tube development	35/729	211/17051	4.78e-12	5.27e-10	3.76e-10	16011/20692/14219/14734/22762/13036/22418/19378/18595/319939/74155/52377/18590/21809/21833/12654/11421/20682/14042/18121/16998/21803/114142/17387/21834/16598/14184/18552/77446/24063/239405/22339/24064/243931/98711	35	Yes
TM2_BP_GO:0030324	TM2	BP	GO:0030324	lung development	34/729	208/17051	1.47e-11	1.24e-09	8.83e-10	16011/20692/14219/14734/22762/13036/22418/19378/18595/319939/74155/52377/18590/21809/21833/12654/11421/20682/14042/18121/16998/21803/114142/17387/21834/16598/14184/77446/24063/239405/22339/24064/243931/98711	34	Yes
TM2_BP_GO:0030326	TM2	BP	GO:0030326	embryonic limb morphogenesis	22/729	126/17051	1.71e-08	5.54e-07	3.95e-07	14734/20319/232174/18933/218772/22418/19378/16917/21808/22160/20204/18121/12288/242022/14451/230857/231470/110350/71175/239405/58250/98711	22	Yes
TM2_BP_GO:0030336	TM2	BP	GO:0030336	negative regulation of cell migration	38/729	270/17051	9.43e-11	6.16e-09	4.39e-09	16011/114886/20317/13179/20315/21825/13134/20319/11815/20377/11819/77125/18133/17684/22003/20563/13078/13479/18121/22240/100952/20312/11932/12798/11539/18787/19252/22411/21803/16971/208177/50768/12825/16449/17965/17319/17470/29876	38	Yes
TM2_BP_GO:0030500	TM2	BP	GO:0030500	regulation of bone mineralization	14/729	78/17051	4.86e-06	8.86e-05	6.32e-05	16007/15251/27047/100038882/14758/22160/20682/12167/16998/12845/18605/13601/14184/11732	14	Yes
TM2_BP_GO:0030502	TM2	BP	GO:0030502	negative regulation of bone mineralization	5/729	17/17051	0.000567543	0.00474004	0.00338132	15251/20682/16998/18605/13601	5	No
TM2_BP_GO:0030509	TM2	BP	GO:0030509	BMP signaling pathway	30/729	149/17051	9.81e-13	1.28e-10	9.14e-11	56213/67888/16007/14734/20319/12389/14313/20289/22418/20377/73230/21808/21809/14042/21419/18121/12167/14362/20660/12845/22057/14118/21803/50766/20482/17131/66042/68010/17965/13653	30	Yes
TM2_BP_GO:0030510	TM2	BP	GO:0030510	regulation of BMP signaling pathway	21/729	95/17051	4.13e-10	2.16e-08	1.54e-08	56213/16007/14734/20319/12389/14313/22418/20377/73230/21419/18121/14362/20660/22057/14118/50766/20482/17131/66042/68010/17965	21	Yes
TM2_BP_GO:0030512	TM2	BP	GO:0030512	negative regulation of transforming growth factor beta receptor signaling pathway	16/729	69/17051	2.43e-08	7.54e-07	5.38e-07	56213/268977/12389/68939/235505/21809/100952/65112/14118/66695/20482/17131/68010/24063/58250/24064	16	Yes
TM2_BP_GO:0030514	TM2	BP	GO:0030514	negative regulation of BMP signaling pathway	17/729	53/17051	3.38e-11	2.57e-09	1.83e-09	56213/20319/12389/22418/20377/73230/18121/14362/20660/22057/14118/50766/20482/17131/66042/68010/17965	17	Yes
TM2_BP_GO:0030534	TM2	BP	GO:0030534	adult behavior	17/729	173/17051	0.00121717	0.00909342	0.00648683	20315/11820/330222/15211/14658/11548/16531/12288/22295/108073/18049/219228/18516/13014/14805/98660/170719	17	No
TM2_BP_GO:0030593	TM2	BP	GO:0030593	neutrophil chemotaxis	17/729	96/17051	5.82e-07	1.32e-05	9.41e-06	13616/12215/20292/13052/15945/19035/14825/16803/20563/21828/13479/20312/16854/13617/17242/227541/20750	17	Yes
TM2_BP_GO:0030595	TM2	BP	GO:0030595	leukocyte chemotaxis	33/729	212/17051	1.13e-10	7.17e-09	5.12e-09	13616/14456/18654/20315/21825/12215/11820/57266/20292/71660/13052/15945/22418/19035/14825/18133/16803/20563/21828/13479/20312/16854/18787/13617/19252/12642/17242/227541/22339/17965/17319/66102/20750	33	Yes
TM2_BP_GO:0030850	TM2	BP	GO:0030850	prostate gland development	8/729	47/17051	0.000769403	0.00610722	0.00435661	20317/22418/20377/17390/20682/18121/12505/18793	8	No
TM2_BP_GO:0030856	TM2	BP	GO:0030856	regulation of epithelial cell differentiation	18/729	141/17051	3.26e-05	0.000434111	0.000309675	67888/12389/74155/21808/235505/24136/20682/12192/18787/14573/12608/329628/24063/22339/16449/24064/12226/17300	18	Yes
TM2_BP_GO:0030900	TM2	BP	GO:0030900	forebrain development	33/729	362/17051	3.69e-05	0.000483293	0.000344759	20315/18993/15251/20356/11820/12558/218772/22418/11819/19378/268902/11804/17967/24136/20563/14042/11826/13865/18121/16777/11932/18186/110350/14184/17242/13175/12010/329628/50768/12825/98660/218194/68169	33	Yes
TM2_BP_GO:0030947	TM2	BP	GO:0030947	regulation of vascular endothelial growth factor receptor signaling pathway	7/729	30/17051	0.000218162	0.0021909	0.00156289	64103/15251/11600/12509/226101/100952/14783	7	Yes
TM2_BP_GO:0031032	TM2	BP	GO:0031032	actomyosin structure organization	23/729	202/17051	1.86e-05	0.000272956	0.000194714	14219/18708/20971/17926/18595/13008/22003/21809/20194/226751/13717/12798/18186/30794/22411/17886/16419/13822/208177/50768/11465/218194/11853	23	Yes
TM2_BP_GO:0031099	TM2	BP	GO:0031099	regeneration	19/729	143/17051	1.11e-05	0.000177997	0.000126975	20315/18933/17390/18133/18039/11421/18081/18787/21803/16971/18746/17242/12608/16193/16880/16476/19716/12224/17319	19	Yes
TM2_BP_GO:0031100	TM2	BP	GO:0031100	animal organ regeneration	7/729	27/17051	0.000106426	0.00119723	0.00085405	20315/11421/21803/18746/12608/16193/16880	7	No
TM2_BP_GO:0031214	TM2	BP	GO:0031214	biomineral tissue development	26/729	151/17051	1.18e-09	5.22e-08	3.73e-08	14456/12843/16007/14734/12842/15251/27047/100038882/14758/22160/20682/12167/16998/12845/18605/22411/21803/211401/12006/66695/13601/14184/12608/239405/11732/20750	26	Yes
TM2_BP_GO:0031290	TM2	BP	GO:0031290	retinal ganglion cell axon guidance	6/729	18/17051	7.14e-05	0.000861976	0.000614894	13640/268902/20563/12167/18186/22339	6	No
TM2_BP_GO:0031333	TM2	BP	GO:0031333	negative regulation of protein-containing complex assembly	15/729	142/17051	0.00111892	0.00842327	0.00600877	12759/12955/20742/17756/231637/27360/22003/20563/21833/20682/20660/65112/59036/19241/16911	15	Yes
TM2_BP_GO:0031346	TM2	BP	GO:0031346	positive regulation of cell projection organization	42/729	423/17051	3.53e-07	8.39e-06	5.98e-06	20317/14268/20315/13640/15507/216616/18208/18708/20356/22418/268902/11504/18845/19266/24136/21809/18039/13176/11826/22240/66573/26563/14362/20312/11932/242274/18186/16971/20482/74055/58804/17242/13405/18049/16193/27279/227541/22339/12361/17319/12492/68169	42	Yes
TM2_BP_GO:0031349	TM2	BP	GO:0031349	positive regulation of defense response	23/729	240/17051	0.00026369	0.00259557	0.00185156	18619/11820/22418/77125/14825/17390/16803/11421/56312/16835/242202/18787/13617/17242/12608/16193/15944/21817/80859/13057/22038/17319/22249	23	Yes
TM2_BP_GO:0031589	TM2	BP	GO:0031589	cell-substrate adhesion	61/729	349/17051	2.7e-21	2.24e-18	1.6e-18	14268/14456/223272/16007/21825/13640/14219/107581/12842/18708/50706/11815/20971/17926/13612/68813/14758/20377/109711/23928/54156/94214/11600/20194/57764/18003/12587/80883/407800/18081/16777/100952/12837/11932/18787/60595/18186/17387/16971/16419/81877/58859/17242/18552/13405/12053/208177/320712/16410/18073/27279/50768/12825/22339/16449/11465/12361/244895/226519/20750/68169	61	Yes
TM2_BP_GO:0031952	TM2	BP	GO:0031952	regulation of protein autophosphorylation	10/729	46/17051	1.93e-05	0.000281941	0.000201123	12389/74155/18590/71785/11421/54635/18605/18049/16476/22339	10	No
TM2_BP_GO:0031954	TM2	BP	GO:0031954	positive regulation of protein autophosphorylation	6/729	24/17051	0.000415651	0.00370871	0.00264562	18590/71785/11421/54635/18049/22339	6	No
TM2_BP_GO:0031960	TM2	BP	GO:0031960	response to corticosteroid	11/729	77/17051	0.000412013	0.00370871	0.00264562	11647/11670/18708/12583/16531/11826/12192/14573/21803/16193/12193	11	No
TM2_BP_GO:0032092	TM2	BP	GO:0032092	positive regulation of protein binding	13/729	98/17051	0.000269531	0.00263063	0.00187657	11820/54409/12389/22418/13848/11421/109624/67025/16971/18049/68010/12010/59036	13	Yes
TM2_BP_GO:0032102	TM2	BP	GO:0032102	negative regulation of response to external stimulus	36/729	361/17051	2.2e-06	4.4e-05	3.14e-05	20317/56213/21825/56496/19223/54598/20356/14190/232345/22418/268902/18595/18133/12258/18590/235505/20563/53322/16835/67389/20312/11539/18787/18186/19252/15937/66208/17242/19128/12505/208177/17965/12361/17319/17470/21930	36	Yes
TM2_BP_GO:0032103	TM2	BP	GO:0032103	positive regulation of response to external stimulus	44/729	382/17051	2.23e-09	9.47e-08	6.76e-08	13616/14268/14456/18654/20315/21825/15507/20356/11820/57266/71660/15945/22418/77125/14825/17390/16803/20563/21828/71785/11421/56312/21983/16835/242202/20312/18787/18186/13617/21803/16971/17242/12608/16193/234311/227541/15944/21817/22339/80859/13057/22038/17319/22249	44	Yes
TM2_BP_GO:0032231	TM2	BP	GO:0032231	regulation of actin filament bundle assembly	16/729	109/17051	1.54e-05	0.000234992	0.000167632	14219/18708/20971/17926/22003/21809/20194/20312/18186/30794/22411/211401/208177/50768/11465/11853	16	No
TM2_BP_GO:0032233	TM2	BP	GO:0032233	positive regulation of actin filament bundle assembly	12/729	65/17051	1.71e-05	0.000255005	0.000181908	14219/20971/17926/22003/21809/20194/20312/18186/30794/22411/211401/11853	12	No
TM2_BP_GO:0032330	TM2	BP	GO:0032330	regulation of chondrocyte differentiation	10/729	48/17051	2.87e-05	0.000388988	0.000277486	14219/216616/218772/17132/20682/16998/12006/21834/17131/17242	10	Yes
TM2_BP_GO:0032640	TM2	BP	GO:0032640	tumor necrosis factor production	18/729	170/17051	0.000363577	0.00334639	0.00238716	12759/14456/21825/15507/18708/11820/22418/83397/77125/74155/16803/22160/11600/20312/16193/71586/13057/17319	18	Yes
TM2_BP_GO:0032680	TM2	BP	GO:0032680	regulation of tumor necrosis factor production	18/729	164/17051	0.000233249	0.00232827	0.00166088	12759/14456/21825/15507/18708/11820/22418/83397/77125/74155/16803/22160/11600/20312/16193/71586/13057/17319	18	Yes
TM2_BP_GO:0032722	TM2	BP	GO:0032722	positive regulation of chemokine production	10/729	66/17051	0.000462884	0.00402166	0.00286887	50706/11820/22418/77125/16803/22160/16971/16193/13653/17319	10	No
TM2_BP_GO:0032760	TM2	BP	GO:0032760	positive regulation of tumor necrosis factor production	14/729	101/17051	9.82e-05	0.00113285	0.000808123	12759/21825/15507/18708/11820/22418/83397/77125/16803/22160/16193/71586/13057/17319	14	Yes
TM2_BP_GO:0032835	TM2	BP	GO:0032835	glomerulus development	17/729	61/17051	4.07e-10	2.15e-08	1.53e-08	12628/12829/18595/11600/71785/14042/11826/18121/70350/71602/12828/211401/74055/18073/16449/13653/17300	17	Yes
TM2_BP_GO:0032836	TM2	BP	GO:0032836	glomerular basement membrane development	5/729	10/17051	2.97e-05	0.000400133	0.000285436	12829/14042/71602/12828/18073	5	No
TM2_BP_GO:0032956	TM2	BP	GO:0032956	regulation of actin cytoskeleton organization	33/729	353/17051	2.22e-05	0.000314935	0.00022466	13640/14219/18708/20742/20356/20292/20971/17926/14758/21808/231637/27360/22003/21809/20563/20194/13717/20312/18186/30794/22411/21803/170643/211401/16971/58804/17242/208177/50768/11465/56431/19241/11853	33	Yes
TM2_BP_GO:0032963	TM2	BP	GO:0032963	collagen metabolic process	29/729	106/17051	4.55e-16	1.38e-13	9.86e-14	114886/14268/12843/14219/12842/15251/268977/17392/13038/20289/14789/74155/17390/52377/21809/76293/100952/18787/26561/21803/26427/17387/81877/12831/14184/14062/16193/12406/14089	29	Yes
TM2_BP_GO:0032964	TM2	BP	GO:0032964	collagen biosynthetic process	18/729	55/17051	6.03e-12	6.37e-10	4.54e-10	114886/14268/14219/12842/268977/20289/14789/74155/52377/21809/100952/18787/21803/26427/12831/14062/16193/12406	18	Yes
TM2_BP_GO:0032965	TM2	BP	GO:0032965	regulation of collagen biosynthetic process	13/729	46/17051	3.95e-08	1.17e-06	8.32e-07	114886/14268/14219/268977/20289/74155/21809/100952/18787/21803/26427/14062/16193	13	Yes
TM2_BP_GO:0032966	TM2	BP	GO:0032966	negative regulation of collagen biosynthetic process	5/729	16/17051	0.000415145	0.00370871	0.00264562	114886/14268/74155/100952/16193	5	No
TM2_BP_GO:0032967	TM2	BP	GO:0032967	positive regulation of collagen biosynthetic process	8/729	30/17051	2.72e-05	0.000369846	0.000263831	14219/268977/20289/21809/18787/21803/26427/14062	8	Yes
TM2_BP_GO:0032970	TM2	BP	GO:0032970	regulation of actin filament-based process	41/729	399/17051	1.95e-07	4.94e-06	3.52e-06	13640/14219/11475/18708/20742/20356/20292/20971/17926/12389/14758/21808/231637/27360/22003/21809/20563/20194/12288/13717/20312/12798/11539/18186/30794/22411/21803/170643/211401/16971/17886/58804/17242/208177/56188/50768/11465/56431/98660/19241/11853	41	Yes
TM2_BP_GO:0033002	TM2	BP	GO:0033002	muscle cell proliferation	35/729	233/17051	8.48e-11	5.61e-09	4e-09	16011/21825/19737/54598/18708/15251/11815/22762/12389/13052/15200/11504/17390/18133/21808/18162/17967/17684/18573/21809/11600/71785/16526/18121/20312/13617/58859/16193/16476/15446/21817/22339/13057/13653/17300	35	Yes
TM2_BP_GO:0033135	TM2	BP	GO:0033135	regulation of peptidyl-serine phosphorylation	16/729	139/17051	0.000297397	0.00280492	0.0020009	14456/20319/11820/12389/22418/11600/17872/21803/17131/13405/12505/18049/16193/22339/17319/24064	16	No
TM2_BP_GO:0033138	TM2	BP	GO:0033138	positive regulation of peptidyl-serine phosphorylation	14/729	104/17051	0.00013526	0.00146511	0.00104514	14456/20319/11820/12389/22418/11600/17872/21803/12505/18049/16193/22339/17319/24064	14	No
TM2_BP_GO:0033627	TM2	BP	GO:0033627	cell adhesion mediated by integrin	11/729	69/17051	0.000153269	0.00161781	0.00115407	223272/67916/107581/18133/21808/13078/14042/18787/14118/16419/16410	11	No
TM2_BP_GO:0034103	TM2	BP	GO:0034103	regulation of tissue remodeling	11/729	78/17051	0.000461479	0.00402166	0.00286887	20377/13876/21828/16998/83924/14184/17242/16193/16410/22339/20750	11	No
TM2_BP_GO:0034329	TM2	BP	GO:0034329	cell junction assembly	48/729	409/17051	2.15e-10	1.27e-08	9.08e-09	14268/58187/64085/68792/13640/107581/18208/18708/11815/21826/11820/14735/54409/20971/12558/17926/12389/22418/14758/109711/330222/242384/19266/12552/20194/11421/21983/14362/246316/60595/319387/18186/22411/17387/16971/17131/208177/77446/219228/396184/16410/50768/22339/11465/244895/226519/53378/11853	48	Yes
TM2_BP_GO:0034446	TM2	BP	GO:0034446	substrate adhesion-dependent cell spreading	18/729	108/17051	6.94e-07	1.54e-05	1.1e-05	14268/13640/50706/17926/68813/20377/23928/20194/57764/18003/80883/16777/60595/18186/17242/16410/244895/226519	18	Yes
TM2_BP_GO:0034754	TM2	BP	GO:0034754	cellular hormone metabolic process	13/729	93/17051	0.000158317	0.00166048	0.00118451	30953/232174/19378/18595/13078/16531/12167/19659/13082/230857/13653/98711/20750	13	Yes
TM2_BP_GO:0035051	TM2	BP	GO:0035051	cardiocyte differentiation	17/729	168/17051	0.000878424	0.00679853	0.00484976	74116/13052/218772/18595/21808/24052/17684/22160/11548/110196/11739/21803/14200/16905/22339/16449/12224	17	Yes
TM2_BP_GO:0035107	TM2	BP	GO:0035107	appendage morphogenesis	28/729	151/17051	4.45e-11	3.17e-09	2.26e-09	14734/20319/232174/18933/218772/22418/19378/16917/18845/21808/22160/20204/20682/14042/21419/18121/12288/12167/242022/14451/230857/231470/110350/18552/71175/239405/58250/98711	28	Yes
TM2_BP_GO:0035108	TM2	BP	GO:0035108	limb morphogenesis	28/729	151/17051	4.45e-11	3.17e-09	2.26e-09	14734/20319/232174/18933/218772/22418/19378/16917/18845/21808/22160/20204/20682/14042/21419/18121/12288/12167/242022/14451/230857/231470/110350/18552/71175/239405/58250/98711	28	Yes
TM2_BP_GO:0035113	TM2	BP	GO:0035113	embryonic appendage morphogenesis	22/729	126/17051	1.71e-08	5.54e-07	3.95e-07	14734/20319/232174/18933/218772/22418/19378/16917/21808/22160/20204/18121/12288/242022/14451/230857/231470/110350/71175/239405/58250/98711	22	Yes
TM2_BP_GO:0035115	TM2	BP	GO:0035115	embryonic forelimb morphogenesis	6/729	29/17051	0.0012226	0.00909342	0.00648683	19378/22160/12288/71175/239405/98711	6	No
TM2_BP_GO:0035136	TM2	BP	GO:0035136	forelimb morphogenesis	7/729	38/17051	0.00100477	0.00765125	0.00545804	19378/22160/21419/12288/71175/239405/98711	7	No
TM2_BP_GO:0035148	TM2	BP	GO:0035148	tube formation	21/729	173/17051	1.61e-05	0.000243183	0.000173476	20319/15251/20971/22418/20377/21808/17684/13800/22160/24136/20682/18121/14362/14573/21803/56334/20733/50768/21817/22339/16911	21	No
TM2_BP_GO:0035150	TM2	BP	GO:0035150	regulation of tube size	29/729	153/17051	1.14e-11	1.03e-09	7.33e-10	13616/11475/20657/15251/12389/68813/17390/27360/12671/58861/11421/14042/11548/16531/242202/12288/14043/20312/12845/11539/74617/238130/13617/230857/16598/14062/60596/98660/17300	29	Yes
TM2_BP_GO:0035265	TM2	BP	GO:0035265	organ growth	25/729	192/17051	7.01e-07	1.55e-05	1.11e-05	21825/23876/22762/74116/13052/218772/16917/18595/21808/17967/17684/20682/14042/11548/16526/18121/12288/12845/110196/11739/13601/77446/239405/24064/17300	25	Yes
TM2_BP_GO:0035272	TM2	BP	GO:0035272	exocrine system development	9/729	50/17051	0.00023559	0.00233752	0.00166748	18590/68151/57764/20682/18186/16193/21817/78908/17300	9	Yes
TM2_BP_GO:0035296	TM2	BP	GO:0035296	regulation of tube diameter	29/729	152/17051	9.61e-12	9e-10	6.42e-10	13616/11475/20657/15251/12389/68813/17390/27360/12671/58861/11421/14042/11548/16531/242202/12288/14043/20312/12845/11539/74617/238130/13617/230857/16598/14062/60596/98660/17300	29	Yes
TM2_BP_GO:0035455	TM2	BP	GO:0035455	response to interferon-alpha	6/729	23/17051	0.000323337	0.00301524	0.00215093	14456/66141/68713/15959/15957/22038	6	Yes
TM2_BP_GO:0035567	TM2	BP	GO:0035567	non-canonical Wnt signaling pathway	11/729	55/17051	1.73e-05	0.000257274	0.000183527	14734/20319/17926/22418/20377/69217/14362/76441/22411/672511/59036	11	No
TM2_BP_GO:0035767	TM2	BP	GO:0035767	endothelial cell chemotaxis	8/729	28/17051	1.56e-05	0.000237239	0.000169235	21825/15507/20356/18133/18186/269608/22339/15370	8	Yes
TM2_BP_GO:0035850	TM2	BP	GO:0035850	epithelial cell differentiation involved in kidney development	7/729	38/17051	0.00100477	0.00765125	0.00545804	14042/70350/71602/14573/211401/329628/16449	7	No
TM2_BP_GO:0035904	TM2	BP	GO:0035904	aorta development	9/729	61/17051	0.00107328	0.00810431	0.00578124	268977/107589/268902/21808/21419/16971/58859/12825/16449	9	No
TM2_BP_GO:0035909	TM2	BP	GO:0035909	aorta morphogenesis	7/729	34/17051	0.000496802	0.00427888	0.00305235	107589/21808/21419/16971/58859/12825/16449	7	No
TM2_BP_GO:0035914	TM2	BP	GO:0035914	skeletal muscle cell differentiation	10/729	70/17051	0.000746637	0.0059743	0.00426179	14733/232174/20289/17684/217082/56312/14281/12224/15370/13653	10	Yes
TM2_BP_GO:0035924	TM2	BP	GO:0035924	cellular response to vascular endothelial growth factor stimulus	11/729	59/17051	3.47e-05	0.000456296	0.0003255	13179/18654/15507/54409/18595/18186/21413/22339/15370/24064/17300	11	Yes
TM2_BP_GO:0035988	TM2	BP	GO:0035988	chondrocyte proliferation	7/729	19/17051	8.15e-06	0.000136992	9.77e-05	14219/18133/20682/14042/12845/17387/17131	7	Yes
TM2_BP_GO:0036075	TM2	BP	GO:0036075	replacement ossification	7/729	31/17051	0.000271494	0.00263063	0.00187657	11647/12842/20289/15530/14042/17387/17300	7	Yes
TM2_BP_GO:0036293	TM2	BP	GO:0036293	response to decreased oxygen levels	24/729	207/17051	9.05e-06	0.00015017	0.000107125	18654/67749/19223/11670/12955/20657/11931/15251/12389/17390/21808/17684/22160/21809/16531/11826/12192/16526/11539/13617/230857/22339/13653/68169	24	Yes
TM2_BP_GO:0036376	TM2	BP	GO:0036376	sodium ion export across plasma membrane	5/729	14/17051	0.000204347	0.0020605	0.00146987	11931/11932/56188/54403/98660	5	Yes
TM2_BP_GO:0038084	TM2	BP	GO:0038084	vascular endothelial growth factor signaling pathway	9/729	41/17051	4.65e-05	0.000589519	0.000420535	13179/18654/15507/18595/18186/21413/22339/24064/17300	9	Yes
TM2_BP_GO:0040013	TM2	BP	GO:0040013	negative regulation of locomotion	44/729	316/17051	4.38e-12	4.94e-10	3.52e-10	16011/114886/20317/13179/20315/21825/13134/20319/11815/20356/22418/20377/11819/268902/77125/18133/17684/22003/20563/13078/13479/18121/22240/100952/20312/11932/12798/11539/18787/18186/19252/22411/21803/16971/20733/105171/208177/50768/12825/16449/17965/17319/17470/29876	44	Yes
TM2_BP_GO:0040036	TM2	BP	GO:0040036	regulation of fibroblast growth factor receptor signaling pathway	7/729	32/17051	0.00033482	0.00309896	0.00221066	21825/14733/22418/18121/26427/24063/24064	7	Yes
TM2_BP_GO:0040037	TM2	BP	GO:0040037	negative regulation of fibroblast growth factor receptor signaling pathway	6/729	19/17051	0.000100611	0.00114479	0.000816643	21825/14733/22418/26427/24063/24064	6	Yes
TM2_BP_GO:0042060	TM2	BP	GO:0042060	wound healing	44/729	339/17051	4.74e-11	3.27e-09	2.33e-09	14268/14456/67916/16007/21825/12628/11475/12842/15251/20971/107589/12389/13052/15200/22418/18595/12496/12258/21808/18590/235505/22003/27973/14042/11826/18121/226101/20312/12845/12798/18787/21803/17886/12831/19128/14062/12505/208177/27279/12825/22339/11465/12361/68169	44	Yes
TM2_BP_GO:0042063	TM2	BP	GO:0042063	gliogenesis	28/729	326/17051	0.000375755	0.0034457	0.002458	12759/14268/67916/216616/14733/11820/12558/17926/77125/23928/215798/21808/20682/16835/18121/16777/26563/20312/11932/76441/21803/16971/15212/14184/17242/13405/16193/17190	28	Yes
TM2_BP_GO:0042249	TM2	BP	GO:0042249	establishment of planar polarity of embryonic epithelium	5/729	18/17051	0.000758363	0.00603891	0.00430788	20319/22418/20377/14362/14238	5	No
TM2_BP_GO:0042310	TM2	BP	GO:0042310	vasoconstriction	19/729	99/17051	3.31e-08	1.01e-06	7.19e-07	13616/11475/15251/12389/68813/17390/27360/12671/58861/11421/11548/242202/12288/20312/12845/238130/13617/14062/98660	19	Yes
TM2_BP_GO:0042326	TM2	BP	GO:0042326	negative regulation of phosphorylation	36/729	393/17051	1.49e-05	0.000228845	0.000163247	67916/20319/15507/12389/19122/20377/11819/74155/19249/235505/22160/20563/11600/56312/18121/100952/20660/18769/65112/17872/18605/19252/21803/170643/17131/23980/15937/56334/14783/13405/77446/16193/16476/24063/24064/23882	36	No
TM2_BP_GO:0042445	TM2	BP	GO:0042445	hormone metabolic process	20/729	179/17051	8.36e-05	0.000990289	0.000706426	30953/15251/232174/13038/19378/12971/18595/13078/11421/16531/12167/114679/19659/13082/230857/12876/18552/13653/98711/20750	20	Yes
TM2_BP_GO:0042476	TM2	BP	GO:0042476	odontogenesis	13/729	108/17051	0.000698991	0.00566617	0.00404198	12842/14313/18595/16777/18787/13617/21803/14451/12006/66695/66042/239405/17300	13	Yes
TM2_BP_GO:0042692	TM2	BP	GO:0042692	muscle cell differentiation	35/729	386/17051	2.41e-05	0.000336443	0.000240003	16011/20315/12628/232174/54409/12558/74116/13052/218772/15945/18595/18133/24052/13008/21833/20682/11548/226101/15081/12845/110196/11739/21803/17387/17886/58859/13405/14200/16905/22339/11465/54720/19241/12224/243931	35	Yes
TM2_BP_GO:0043010	TM2	BP	GO:0043010	camera-type eye development	42/729	339/17051	5.68e-10	2.85e-08	2.03e-08	329941/12628/12955/12215/15251/14107/218772/19378/16917/18595/330222/23928/21808/17684/22160/24136/80837/13078/17132/20682/11826/18081/12288/12167/225998/12837/18186/14238/21803/14451/114142/20482/21834/14184/16476/24063/22339/16449/24064/98711/29876/17300	42	Yes
TM2_BP_GO:0043062	TM2	BP	GO:0043062	extracellular structure organization	81/729	293/17051	2.32e-43	1.15e-39	8.19e-40	329941/14268/12843/16007/23876/14219/20319/107581/11568/12842/53381/50706/20356/11820/54409/12389/16949/269959/17392/20289/15530/14758/108075/12829/16917/11504/18595/11804/17390/21808/54156/94214/207596/56693/17022/13078/57764/12587/78892/80883/20682/407800/14042/11787/16777/16998/76293/100952/13717/12837/71355/77739/12845/16854/71602/26561/14238/21803/12828/26427/17387/18451/81877/12831/12827/58…	81	Yes
TM2_BP_GO:0043116	TM2	BP	GO:0043116	negative regulation of vascular permeability	6/729	20/17051	0.000138556	0.00147506	0.00105224	54409/83397/20563/11600/27494/22339	6	No
TM2_BP_GO:0043149	TM2	BP	GO:0043149	stress fiber assembly	17/729	111/17051	4.68e-06	8.63e-05	6.15e-05	14219/18708/20971/17926/22003/21809/20194/13717/18186/30794/22411/16419/208177/50768/11465/218194/11853	17	No
TM2_BP_GO:0043154	TM2	BP	GO:0043154	negative regulation of cysteine-type endopeptidase activity involved in apoptotic process	11/729	74/17051	0.000289439	0.00276136	0.00196983	14456/21825/20319/12955/13479/11826/12505/16193/18793/22339/15370	11	No
TM2_BP_GO:0043171	TM2	BP	GO:0043171	peptide catabolic process	6/729	26/17051	0.000660947	0.00540191	0.00385347	13036/13479/11421/230857/12876/16790	6	No
TM2_BP_GO:0043200	TM2	BP	GO:0043200	response to amino acid	13/729	78/17051	2.42e-05	0.000336626	0.000240133	12843/107581/12842/17392/18595/17390/71785/12583/14658/12833/54635/12608/12825	13	No
TM2_BP_GO:0043254	TM2	BP	GO:0043254	regulation of protein-containing complex assembly	33/729	428/17051	0.00081493	0.00641725	0.00457777	12759/12955/20742/20292/12389/17392/17756/17967/231637/27360/22003/20563/21833/20682/15081/13717/20660/72333/116837/16854/65112/13196/21803/170643/58804/18552/22339/59036/19241/22249/110074/11853/16911	33	No
TM2_BP_GO:0043271	TM2	BP	GO:0043271	negative regulation of ion transport	29/729	346/17051	0.000445204	0.00392302	0.0027985	21825/11815/12389/14758/20377/18133/21808/22160/11735/11600/53322/11421/13121/231070/18769/11539/18605/20788/21803/108073/18704/29810/14783/14062/16410/109731/98660/17470/50790	29	No
TM2_BP_GO:0043281	TM2	BP	GO:0043281	regulation of cysteine-type endopeptidase activity involved in apoptotic process	19/729	197/17051	0.000810265	0.00639066	0.0045588	14456/16007/21825/14219/20319/12955/11820/13479/11826/215114/12828/14062/12505/18049/16193/50768/18793/22339/15370	19	No
TM2_BP_GO:0043393	TM2	BP	GO:0043393	regulation of protein binding	22/729	217/17051	0.000160174	0.00167642	0.00119588	11820/54409/12389/22418/17756/11804/66849/13848/11600/11421/18121/109624/66573/20660/67025/16971/18049/68010/12010/83560/59036/22038	22	No
TM2_BP_GO:0043405	TM2	BP	GO:0043405	regulation of MAP kinase activity	27/729	279/17051	6.76e-05	0.000820467	0.000585283	17311/13616/21825/20319/11820/16012/12389/22418/20377/18590/24136/21809/71785/242202/94275/20660/54635/19252/21803/74055/81877/69183/24063/22339/17319/24064/23882	27	Yes
TM2_BP_GO:0043406	TM2	BP	GO:0043406	positive regulation of MAP kinase activity	19/729	206/17051	0.00137949	0.00999075	0.00712694	17311/13616/21825/11820/16012/22418/18590/24136/21809/71785/242202/94275/54635/21803/74055/69183/22339/17319/23882	19	No
TM2_BP_GO:0043410	TM2	BP	GO:0043410	positive regulation of MAPK cascade	51/729	496/17051	6.02e-09	2.19e-07	1.57e-07	17311/13616/14456/16010/20315/21825/14219/11475/11820/16012/20292/12558/21858/22418/83397/73230/18595/21808/18590/24136/21809/11600/13176/71785/12654/11548/21983/242202/94275/26563/20312/54635/18186/13617/21803/109042/16971/17318/74055/66208/14184/14062/12505/18049/16193/69183/16476/22339/17319/24064/23882	51	Yes
TM2_BP_GO:0043491	TM2	BP	GO:0043491	protein kinase B signaling	23/729	197/17051	1.23e-05	0.000192594	0.000137387	16011/14456/67888/20315/21825/20356/17926/15200/17392/52377/18590/11600/12654/20682/12192/21983/67389/20312/21803/109042/16193/22339/24064	23	Yes
TM2_BP_GO:0043523	TM2	BP	GO:0043523	regulation of neuron apoptotic process	27/729	268/17051	3.37e-05	0.000446634	0.000318608	15251/11820/19122/17748/21808/21809/18039/11600/16531/21419/20312/12931/18186/14573/108073/16971/14184/17242/12608/14062/18049/16476/22339/13653/12804/170719/68169	27	Yes
TM2_BP_GO:0043524	TM2	BP	GO:0043524	negative regulation of neuron apoptotic process	21/729	181/17051	3.21e-05	0.000428624	0.00030576	15251/17748/21809/18039/11600/21419/20312/12931/18186/14573/108073/16971/17242/12608/14062/18049/16476/22339/12804/170719/68169	21	No
TM2_BP_GO:0043534	TM2	BP	GO:0043534	blood vessel endothelial cell migration	14/729	116/17051	0.000429859	0.0038149	0.00272138	68792/21825/15507/15251/20563/11600/80837/18186/21803/17886/27494/18704/22339/15370	14	Yes
TM2_BP_GO:0043536	TM2	BP	GO:0043536	positive regulation of blood vessel endothelial cell migration	11/729	56/17051	2.07e-05	0.000298121	0.000212666	68792/21825/15507/15251/11600/80837/18186/21803/27494/18704/22339	11	Yes
TM2_BP_GO:0043542	TM2	BP	GO:0043542	endothelial cell migration	29/729	207/17051	1.78e-08	5.69e-07	4.06e-07	20317/13179/20692/67916/68792/21825/15507/12215/15251/20356/22418/73230/11819/18133/20563/11600/80837/13078/18186/269608/21803/17886/27494/18704/16410/14645/14089/22339/15370	29	Yes
TM2_BP_GO:0043583	TM2	BP	GO:0043583	ear development	29/729	224/17051	1.04e-07	2.78e-06	1.98e-06	18208/57266/20971/18933/12609/22418/73230/21808/20204/17132/20682/16531/18121/231070/26563/22295/242022/14451/230857/320398/14184/71175/329628/16449/14972/54670/24064/98711/12814	29	Yes
TM2_BP_GO:0043588	TM2	BP	GO:0043588	skin development	22/729	254/17051	0.00137524	0.00997453	0.00711537	16011/12843/12842/232174/14313/22418/74155/21808/18590/235505/20682/12192/21419/72333/12845/66042/231470/12831/105171/12825/29876/17300	22	Yes
TM2_BP_GO:0043618	TM2	BP	GO:0043618	regulation of transcription from RNA polymerase II promoter in response to stress	11/729	46/17051	2.74e-06	5.4e-05	3.85e-05	15251/17684/17872/26427/16598/29810/12608/16476/22339/13653/81489	11	Yes
TM2_BP_GO:0043620	TM2	BP	GO:0043620	regulation of DNA-templated transcription in response to stress	11/729	51/17051	8.06e-06	0.000136883	9.76e-05	15251/17684/17872/26427/16598/29810/12608/16476/22339/13653/81489	11	Yes
TM2_BP_GO:0044342	TM2	BP	GO:0044342	type B pancreatic cell proliferation	8/729	25/17051	6.08e-06	0.000105836	7.55e-05	16011/16010/11534/20377/74155/18133/56312/15370	8	No
TM2_BP_GO:0044344	TM2	BP	GO:0044344	cellular response to fibroblast growth factor stimulus	19/729	88/17051	4.28e-09	1.7e-07	1.21e-07	21825/14219/14733/22418/20377/14042/12192/18121/14043/26427/14184/12505/396184/329628/24063/12193/15370/24064/68169	19	Yes
TM2_BP_GO:0044706	TM2	BP	GO:0044706	multi-multicellular organism process	17/729	146/17051	0.000169315	0.00176095	0.00125618	16011/19223/16157/232345/11819/17390/17684/67968/16777/15081/15212/56334/18552/15446/16477/22339/50790	17	Yes
TM2_BP_GO:0045137	TM2	BP	GO:0045137	development of primary sexual characteristics	25/729	210/17051	3.68e-06	7e-05	5e-05	17311/13134/20319/53381/30953/22762/14313/22418/20377/11504/18595/17390/21808/17684/11600/20682/56312/12167/15081/18787/12608/16410/22339/98711/17300	25	Yes
TM2_BP_GO:0045216	TM2	BP	GO:0045216	cell-cell junction organization	21/729	190/17051	6.57e-05	0.000798962	0.000569943	58187/64817/54409/12558/12389/13052/21808/12552/21809/11421/14042/60595/22411/21803/211401/17131/14062/77446/22339/11465/11853	21	Yes
TM2_BP_GO:0045229	TM2	BP	GO:0045229	external encapsulating structure organization	80/729	293/17051	2.19e-42	3.62e-39	2.58e-39	329941/14268/12843/16007/23876/14219/20319/107581/11568/12842/53381/50706/20356/11820/54409/12389/16949/269959/17392/20289/15530/14758/108075/12829/16917/11504/18595/11804/17390/21808/54156/94214/207596/56693/17022/13078/57764/12587/78892/80883/20682/407800/14042/11787/16777/16998/76293/100952/13717/12837/71355/77739/12845/16854/71602/26561/14238/21803/12828/26427/17387/18451/81877/12831/12827/58…	80	Yes
TM2_BP_GO:0045444	TM2	BP	GO:0045444	fat cell differentiation	30/729	252/17051	4.02e-07	9.4e-06	6.71e-06	20319/22762/71660/12609/22418/20377/117167/18595/24117/53322/108012/20318/230587/12192/21419/231070/16913/18605/21803/71175/12608/14560/12193/22339/16449/59036/12224/74186/15370/70717	30	Yes
TM2_BP_GO:0045598	TM2	BP	GO:0045598	regulation of fat cell differentiation	19/729	144/17051	1.23e-05	0.000192594	0.000137387	20319/22762/71660/22418/20377/24117/53322/12192/231070/18605/21803/12608/12193/22339/16449/59036/12224/74186/70717	19	Yes
TM2_BP_GO:0045599	TM2	BP	GO:0045599	negative regulation of fat cell differentiation	9/729	56/17051	0.000566898	0.00474004	0.00338132	22762/22418/53322/231070/18605/21803/12193/22339/16449	9	No
TM2_BP_GO:0045600	TM2	BP	GO:0045600	positive regulation of fat cell differentiation	10/729	68/17051	0.000590807	0.00488499	0.00348472	20319/71660/20377/24117/12192/12608/59036/12224/74186/70717	10	Yes
TM2_BP_GO:0045661	TM2	BP	GO:0045661	regulation of myoblast differentiation	9/729	55/17051	0.00049423	0.00426413	0.00304183	11906/18708/57266/15945/20682/12192/21803/66042/12226	9	No
TM2_BP_GO:0045662	TM2	BP	GO:0045662	negative regulation of myoblast differentiation	6/729	28/17051	0.00100557	0.00765125	0.00545804	11906/57266/15945/20682/21803/66042	6	No
TM2_BP_GO:0045667	TM2	BP	GO:0045667	regulation of osteoblast differentiation	21/729	135/17051	2.79e-07	6.75e-06	4.82e-06	16011/16007/20319/12609/20377/22160/16478/20682/18121/12167/225998/22057/12006/50766/12608/16193/68010/16905/14560/22339/16449	21	Yes
TM2_BP_GO:0045668	TM2	BP	GO:0045668	negative regulation of osteoblast differentiation	11/729	52/17051	9.83e-06	0.000160381	0.000114408	16011/20377/22160/20682/18121/225998/22057/12006/50766/68010/14560	11	Yes
TM2_BP_GO:0045669	TM2	BP	GO:0045669	positive regulation of osteoblast differentiation	11/729	71/17051	0.000199141	0.00202862	0.00144712	16007/20319/12609/16478/12167/12608/16193/16905/14560/22339/16449	11	Yes
TM2_BP_GO:0045765	TM2	BP	GO:0045765	regulation of angiogenesis	47/729	281/17051	6.93e-16	1.81e-13	1.29e-13	20317/13179/18654/20692/21825/23876/19223/20319/15507/64103/15251/21826/13036/20356/20292/54409/15945/22418/73230/11504/21808/58861/80837/12509/13078/12654/11826/100952/20312/16854/18787/18186/12828/26427/27494/13601/16598/12827/18746/17242/21413/14645/27279/22339/24064/12226/17300	47	Yes
TM2_BP_GO:0045766	TM2	BP	GO:0045766	positive regulation of angiogenesis	25/729	163/17051	2.78e-08	8.51e-07	6.07e-07	18654/21825/19223/20319/15507/15251/13036/20356/20292/54409/22418/73230/58861/13078/12654/11826/20312/16854/18787/18186/13601/18746/17242/22339/12226	25	Yes
TM2_BP_GO:0045773	TM2	BP	GO:0045773	positive regulation of axon extension	9/729	54/17051	0.000429385	0.0038149	0.00272138	14268/20315/18208/20356/18186/16971/18049/27279/22339	9	No
TM2_BP_GO:0045785	TM2	BP	GO:0045785	positive regulation of cell adhesion	52/729	429/17051	1.1e-11	1.01e-09	7.2e-10	16008/14268/11906/20315/67916/16007/21825/107581/11534/20971/17926/12389/13612/14924/22418/68813/21808/54156/17684/94214/11735/22003/13848/11600/20194/18003/407800/18081/54446/100952/12837/20312/18186/21803/17131/58859/17242/18552/13405/12505/12053/320712/16193/16410/18073/21817/18793/22339/80859/20750/18950/68169	52	Yes
TM2_BP_GO:0045860	TM2	BP	GO:0045860	positive regulation of protein kinase activity	36/729	432/17051	0.000107462	0.00120615	0.000860411	12759/17311/13616/14456/16007/21825/11820/16012/20971/15200/19122/22418/21808/18590/24136/21809/11600/71785/12654/11421/18003/242202/94275/54635/80982/11539/14118/21803/12006/74055/14062/69183/22339/13653/17319/23882	36	Yes
TM2_BP_GO:0045861	TM2	BP	GO:0045861	negative regulation of proteolysis	36/729	285/17051	5.85e-09	2.15e-07	1.54e-07	20317/14456/21825/14734/20319/12955/18708/13010/11820/74116/21858/232345/56374/12258/235505/13479/209378/21859/11826/20660/18787/67025/14451/13601/23980/20733/12505/18049/16193/68581/12406/13014/18793/22339/15370/53378	36	No
TM2_BP_GO:0045906	TM2	BP	GO:0045906	negative regulation of vasoconstriction	5/729	13/17051	0.000136145	0.00146511	0.00104514	15251/68813/17390/20312/238130	5	No
TM2_BP_GO:0045926	TM2	BP	GO:0045926	negative regulation of growth	29/729	255/17051	1.61e-06	3.29e-05	2.35e-05	16011/14734/20319/18208/12955/20564/15251/20356/232441/74116/13052/22418/20377/17756/18133/21808/72269/17684/20563/16526/11787/18121/18186/18605/22411/21803/14451/14184/12053	29	Yes
TM2_BP_GO:0045927	TM2	BP	GO:0045927	positive regulation of growth	28/729	288/17051	4.6e-05	0.000589351	0.000420416	14268/20315/13640/20319/18208/22762/20356/15200/20377/19035/21808/17967/116837/18787/18186/110196/11739/17387/16971/17131/71175/18049/27279/22339/13057/50790/66102/53378	28	Yes
TM2_BP_GO:0045932	TM2	BP	GO:0045932	negative regulation of muscle contraction	8/729	29/17051	2.07e-05	0.000298121	0.000212666	54598/68813/16531/242202/11539/238130/60596/98660	8	No
TM2_BP_GO:0045936	TM2	BP	GO:0045936	negative regulation of phosphate metabolic process	40/729	487/17051	6.22e-05	0.000758351	0.000540972	67916/20319/15507/12389/19122/20377/11819/74155/21808/72269/18590/19249/235505/22160/20563/11600/56312/18121/100952/20660/18769/65112/17872/18605/19252/21803/170643/17131/338367/23980/15937/56334/14783/13405/77446/16193/16476/24063/24064/23882	40	No
TM2_BP_GO:0045986	TM2	BP	GO:0045986	negative regulation of smooth muscle contraction	6/729	19/17051	0.000100611	0.00114479	0.000816643	54598/68813/16531/11539/238130/60596	6	No
TM2_BP_GO:0046545	TM2	BP	GO:0046545	development of primary female sexual characteristics	16/729	109/17051	1.54e-05	0.000234992	0.000167632	17311/13134/30953/22762/14313/20377/11504/18595/17390/11600/56312/12167/18787/12608/22339/17300	16	Yes
TM2_BP_GO:0046580	TM2	BP	GO:0046580	negative regulation of Ras protein signal transduction	9/729	55/17051	0.00049423	0.00426413	0.00304183	17926/21858/21808/11548/12053/77446/24063/50768/24064	9	No
TM2_BP_GO:0046660	TM2	BP	GO:0046660	female sex differentiation	17/729	125/17051	2.35e-05	0.000330203	0.000235552	17311/13134/30953/22762/14313/22418/20377/11504/18595/17390/11600/56312/12167/18787/12608/22339/17300	17	Yes
TM2_BP_GO:0046688	TM2	BP	GO:0046688	response to copper ion	6/729	25/17051	0.000527305	0.00449631	0.00320746	20657/19122/17748/11826/12870/17750	6	No
TM2_BP_GO:0046716	TM2	BP	GO:0046716	muscle cell cellular homeostasis	5/729	20/17051	0.00127818	0.00938026	0.00669144	15251/21803/29810/13405/16193	5	No
TM2_BP_GO:0046849	TM2	BP	GO:0046849	bone remodeling	12/729	101/17051	0.00124323	0.00916954	0.00654113	13038/20377/14042/16998/83924/18605/14184/17242/16193/16410/22339/20750	12	No
TM2_BP_GO:0046850	TM2	BP	GO:0046850	regulation of bone remodeling	9/729	60/17051	0.000950295	0.00730917	0.00521402	20377/16998/83924/14184/17242/16193/16410/22339/20750	9	No
TM2_BP_GO:0046916	TM2	BP	GO:0046916	cellular transition metal ion homeostasis	12/729	96/17051	0.000790763	0.00624677	0.00445616	14325/14319/15251/11820/19122/17748/117167/11804/12870/69048/68428/17750	12	No
TM2_BP_GO:0048008	TM2	BP	GO:0048008	platelet-derived growth factor receptor signaling pathway	11/729	64/17051	7.59e-05	0.000906891	0.000646934	30953/11815/18595/18590/71785/215114/54635/71602/18186/16971/22339	11	No
TM2_BP_GO:0048010	TM2	BP	GO:0048010	vascular endothelial growth factor receptor signaling pathway	12/729	48/17051	5.75e-07	1.31e-05	9.34e-06	18654/15507/64103/15251/11600/12509/226101/100952/18186/14783/22339/17300	12	Yes
TM2_BP_GO:0048015	TM2	BP	GO:0048015	phosphatidylinositol-mediated signaling	21/729	165/17051	7.72e-06	0.000131574	9.39e-05	14268/13179/18708/17926/18595/21808/18590/18162/19249/22160/11600/71785/20682/12192/26563/54635/74055/14389/18704/14062/22339	21	No
TM2_BP_GO:0048017	TM2	BP	GO:0048017	inositol lipid-mediated signaling	21/729	168/17051	1.02e-05	0.000165466	0.000118036	14268/13179/18708/17926/18595/21808/18590/18162/19249/22160/11600/71785/20682/12192/26563/54635/74055/14389/18704/14062/22339	21	No
TM2_BP_GO:0048041	TM2	BP	GO:0048041	focal adhesion assembly	17/729	82/17051	5.3e-08	1.52e-06	1.08e-06	13640/107581/11815/20971/17926/14758/109711/20194/18186/17387/16971/208177/16410/50768/22339/11465/244895	17	Yes
TM2_BP_GO:0048144	TM2	BP	GO:0048144	fibroblast proliferation	17/729	107/17051	2.79e-06	5.48e-05	3.91e-05	14268/14456/13134/14319/22418/20377/18595/18590/71785/11826/56312/54635/18787/13617/21803/16476/17319	17	Yes
TM2_BP_GO:0048145	TM2	BP	GO:0048145	regulation of fibroblast proliferation	16/729	105/17051	9.47e-06	0.00015663	0.000111732	14268/14456/13134/14319/22418/20377/18595/18590/71785/11826/56312/54635/18787/21803/16476/17319	16	No
TM2_BP_GO:0048146	TM2	BP	GO:0048146	positive regulation of fibroblast proliferation	12/729	67/17051	2.35e-05	0.000330203	0.000235552	14268/14456/22418/18595/18590/71785/11826/54635/18787/21803/16476/17319	12	No
TM2_BP_GO:0048247	TM2	BP	GO:0048247	lymphocyte chemotaxis	9/729	50/17051	0.00023559	0.00233752	0.00166748	14456/20315/57266/20292/15945/22418/20312/12642/66102	9	Yes
TM2_BP_GO:0048251	TM2	BP	GO:0048251	elastic fiber assembly	8/729	11/17051	1.58e-09	6.89e-08	4.91e-08	23876/108075/207596/16998/76293/100952/81877/58859	8	Yes
TM2_BP_GO:0048286	TM2	BP	GO:0048286	lung alveolus development	11/729	61/17051	4.79e-05	0.000603455	0.000430477	16011/319939/74155/18590/21809/11421/16998/21803/114142/14184/22339	11	No
TM2_BP_GO:0048545	TM2	BP	GO:0048545	response to steroid hormone	19/729	202/17051	0.00109449	0.00825191	0.00588653	11647/67749/11670/18708/12389/20377/21808/21809/12583/11548/16531/11826/12192/14573/21803/16193/12193/98660/20750	19	No
TM2_BP_GO:0048546	TM2	BP	GO:0048546	digestive tract morphogenesis	8/729	50/17051	0.00117369	0.0088089	0.00628386	20319/15251/22418/20377/18595/14184/71175/59036	8	Yes
TM2_BP_GO:0048562	TM2	BP	GO:0048562	embryonic organ morphogenesis	30/729	286/17051	5.64e-06	0.000100236	7.15e-05	18208/15251/18933/218772/15530/22418/19378/18595/21808/17684/22160/20204/21809/50530/20682/18121/231070/17150/22295/14238/22411/14451/17387/320398/56334/71175/58250/24064/98711/12814	30	Yes
TM2_BP_GO:0048565	TM2	BP	GO:0048565	digestive tract development	19/729	109/17051	1.65e-07	4.31e-06	3.07e-06	20319/15251/71660/218772/22418/20377/19378/18595/18590/14042/54635/14238/14184/18552/71175/329628/12825/59036/12224	19	Yes
TM2_BP_GO:0048566	TM2	BP	GO:0048566	embryonic digestive tract development	7/729	31/17051	0.000271494	0.00263063	0.00187657	71660/218772/19378/18595/14238/18552/71175	7	Yes
TM2_BP_GO:0048568	TM2	BP	GO:0048568	embryonic organ development	48/729	457/17051	8.66e-09	3.07e-07	2.19e-07	17311/16007/18208/15251/22762/71660/18933/218772/15530/22418/11819/19378/18595/21808/18590/17684/22160/20204/21809/50530/20682/12192/18121/231070/17150/22295/54635/14238/14573/22411/21803/14451/17387/320398/56334/18552/71175/20733/12608/18516/16410/16477/22339/58250/24064/98711/17300/12814	48	Yes
TM2_BP_GO:0048588	TM2	BP	GO:0048588	developmental cell growth	26/729	257/17051	4.36e-05	0.000562899	0.000401546	14268/20315/13640/18208/20564/50706/20356/11820/74116/22418/17756/24136/20563/20682/11548/116837/18186/110196/11739/16971/17131/13175/18049/396184/27279/22339	26	Yes
TM2_BP_GO:0048592	TM2	BP	GO:0048592	eye morphogenesis	22/729	175/17051	5.78e-06	0.000102328	7.3e-05	329941/12628/15251/14107/218772/330222/17684/22160/50530/20682/11826/17150/225998/12837/14238/14451/21834/12831/14184/71175/22339/16449	22	Yes
TM2_BP_GO:0048593	TM2	BP	GO:0048593	camera-type eye morphogenesis	16/729	144/17051	0.000443808	0.00391767	0.00279468	329941/12628/15251/14107/330222/17684/22160/20682/11826/225998/12837/14238/21834/14184/22339/16449	16	Yes
TM2_BP_GO:0048608	TM2	BP	GO:0048608	reproductive structure development	40/729	427/17051	2.91e-06	5.68e-05	4.05e-05	17311/20317/56213/16007/19223/20319/16157/53381/30953/15251/22762/14313/22418/20377/11819/11504/18595/17390/21808/17684/11600/20682/56312/12192/18121/12167/15081/18787/14238/56334/71175/20733/12608/12505/16410/16477/18793/22339/98711/17300	40	Yes
TM2_BP_GO:0048638	TM2	BP	GO:0048638	regulation of developmental growth	31/729	379/17051	0.00043658	0.00386763	0.00275899	14268/20315/13640/18208/22762/20356/11820/74116/13052/22418/17756/19035/17967/17684/20563/16526/18121/12288/116837/18787/18186/110196/11739/16971/17131/14184/71175/18049/27279/22339/17300	31	No
TM2_BP_GO:0048644	TM2	BP	GO:0048644	muscle organ morphogenesis	15/729	81/17051	1.48e-06	3.04e-05	2.17e-05	22762/107589/22418/21808/22003/11600/18121/14362/21803/17131/58859/77446/12825/17300/12814	15	No
TM2_BP_GO:0048645	TM2	BP	GO:0048645	animal organ formation	10/729	65/17051	0.000408114	0.00370815	0.00264523	22418/268902/17684/14042/18121/14573/22411/12006/24063/98711	10	No
TM2_BP_GO:0048659	TM2	BP	GO:0048659	smooth muscle cell proliferation	26/729	172/17051	2e-08	6.23e-07	4.45e-07	16011/21825/19737/54598/18708/15251/11815/12389/15200/11504/17390/18133/18162/18573/21809/71785/20312/13617/58859/16193/16476/15446/21817/22339/13057/13653	26	Yes
TM2_BP_GO:0048660	TM2	BP	GO:0048660	regulation of smooth muscle cell proliferation	24/729	167/17051	1.85e-07	4.71e-06	3.36e-06	16011/21825/19737/54598/18708/15251/11815/12389/15200/11504/17390/18162/18573/21809/71785/20312/58859/16193/16476/15446/21817/22339/13057/13653	24	Yes
TM2_BP_GO:0048661	TM2	BP	GO:0048661	positive regulation of smooth muscle cell proliferation	16/729	107/17051	1.21e-05	0.000190189	0.000135672	16011/21825/54598/15251/15200/11504/17390/71785/20312/16193/16476/15446/21817/22339/13057/13653	16	Yes
TM2_BP_GO:0048701	TM2	BP	GO:0048701	embryonic cranial skeleton morphogenesis	11/729	49/17051	5.33e-06	9.51e-05	6.78e-05	18933/18595/21808/22160/20204/21809/14451/17387/71175/58250/98711	11	No
TM2_BP_GO:0048704	TM2	BP	GO:0048704	embryonic skeletal system morphogenesis	14/729	87/17051	1.8e-05	0.000265435	0.000189349	18933/15530/18595/21808/22160/20204/21809/18121/14451/17387/71175/58250/98711/12814	14	No
TM2_BP_GO:0048705	TM2	BP	GO:0048705	skeletal system morphogenesis	41/729	217/17051	6.64e-16	1.81e-13	1.29e-13	11647/21825/14219/20319/12842/30953/232174/18933/218772/20289/15530/20377/18595/17390/21808/17684/22160/20204/21809/21833/20682/14042/18121/231070/12643/12167/16998/14043/12845/14451/12006/17387/80707/14184/71175/12406/22339/58250/98711/17300/12814	41	Yes
TM2_BP_GO:0048706	TM2	BP	GO:0048706	embryonic skeletal system development	19/729	114/17051	3.42e-07	8.16e-06	5.82e-06	12842/18933/20289/15530/22418/18595/21808/22160/20204/21809/14042/18121/14451/17387/18552/71175/58250/98711/12814	19	No
TM2_BP_GO:0048732	TM2	BP	GO:0048732	gland development	35/729	417/17051	0.000115972	0.00127853	0.000912041	16011/20317/18208/15251/20292/12389/22418/20377/18595/17390/18590/17684/68151/21809/20563/21833/12583/57764/20682/18121/18186/21803/66042/18746/17242/12608/12505/16193/16476/21817/18793/22339/78908/17300/16911	35	Yes
TM2_BP_GO:0048736	TM2	BP	GO:0048736	appendage development	31/729	178/17051	2.21e-11	1.76e-09	1.26e-09	14734/20319/232174/18933/218772/20289/22418/11819/19378/16917/18845/21808/22160/20204/20682/14042/21419/18121/12288/12167/242022/12845/14451/230857/231470/110350/18552/71175/239405/58250/98711	31	Yes
TM2_BP_GO:0048738	TM2	BP	GO:0048738	cardiac muscle tissue development	27/729	245/17051	6.62e-06	0.000114879	8.19e-05	22762/74116/13052/218772/15530/22418/19378/18595/21808/24052/17967/17684/22003/11600/11548/16526/18121/110196/11739/21803/17131/77446/14200/16905/22339/17300/12814	27	Yes
TM2_BP_GO:0048745	TM2	BP	GO:0048745	smooth muscle tissue development	7/729	25/17051	6.21e-05	0.000758351	0.000540972	30953/107589/20682/114142/58859/12825/243931	7	No
TM2_BP_GO:0048754	TM2	BP	GO:0048754	branching morphogenesis of an epithelial tube	29/729	176/17051	3.85e-10	2.06e-08	1.47e-08	18654/20315/14734/20319/13036/20356/20292/22418/18595/20563/11600/20682/14042/18121/94275/18186/13617/14573/21803/17387/17242/12505/329628/24063/239405/22339/24064/98711/29876	29	Yes
TM2_BP_GO:0048762	TM2	BP	GO:0048762	mesenchymal cell differentiation	41/729	222/17051	1.52e-15	3.42e-13	2.44e-13	17311/13616/14268/67888/20319/12842/15251/20356/12558/22418/20377/19378/13876/21808/17684/22160/24136/21809/20682/14042/18121/13082/18186/13617/14573/22411/21803/12006/17131/17242/208177/16193/68010/24063/18793/22339/16449/24064/98711/17300/53378	41	Yes
TM2_BP_GO:0048771	TM2	BP	GO:0048771	tissue remodeling	25/729	186/17051	3.82e-07	8.99e-06	6.41e-06	16011/15251/12389/13038/20377/13876/17390/21808/21828/14042/11548/16998/83924/18605/17387/14184/17242/14062/16193/16410/21817/22339/16449/20750/17300	25	Yes
TM2_BP_GO:0048839	TM2	BP	GO:0048839	inner ear development	24/729	196/17051	3.51e-06	6.72e-05	4.79e-05	18208/57266/20971/18933/12609/22418/73230/21808/20204/17132/20682/16531/231070/26563/22295/242022/320398/14184/329628/16449/14972/54670/24064/12814	24	Yes
TM2_BP_GO:0048844	TM2	BP	GO:0048844	artery morphogenesis	20/729	72/17051	1.24e-11	1.08e-09	7.67e-10	107589/18933/21808/17684/20204/21419/16835/18121/12845/18186/22411/16971/17131/58859/17242/15446/12825/22339/16449/17300	20	Yes
TM2_BP_GO:0048846	TM2	BP	GO:0048846	axon extension involved in axon guidance	7/729	36/17051	0.000715746	0.00576234	0.00411058	20315/20564/20356/22418/20563/18186/22339	7	No
TM2_BP_GO:0048863	TM2	BP	GO:0048863	stem cell differentiation	27/729	205/17051	2e-07	5.04e-06	3.6e-06	17311/13616/14268/15251/20356/12558/232345/20377/19378/18595/21808/17684/22160/24136/76626/20682/14042/16998/14362/13082/18186/13617/14573/12193/16449/98711/17300	27	Yes
TM2_BP_GO:0048864	TM2	BP	GO:0048864	stem cell development	19/729	86/17051	2.84e-09	1.2e-07	8.53e-08	17311/13616/14268/15251/20356/12558/19378/17684/22160/24136/76626/20682/13082/18186/13617/14573/16449/98711/17300	19	Yes
TM2_BP_GO:0048880	TM2	BP	GO:0048880	sensory system development	48/729	391/17051	4.49e-11	3.17e-09	2.26e-09	329941/12628/12955/12215/15251/14107/218772/19378/16917/18595/330222/23928/21808/17684/22160/24136/50530/80837/13078/17132/20682/11826/18081/12288/12167/17150/225998/12837/242022/18186/14238/21803/14451/114142/20482/21834/12831/14184/71175/18516/16476/24063/22339/16449/24064/98711/29876/17300	48	Yes
TM2_BP_GO:0050673	TM2	BP	GO:0050673	epithelial cell proliferation	54/729	424/17051	5.99e-13	8.03e-11	5.73e-11	16011/329941/20317/56213/18654/16010/20692/20315/21825/14734/20319/64103/20356/11534/20292/12389/13052/14313/22418/20377/73230/11819/19378/74155/18133/21808/235505/22160/21828/20682/56312/12192/18121/94275/12837/13617/21803/14451/12828/211401/114142/13601/14184/17242/12608/16193/12010/16476/14645/14089/22339/12361/13057/15370	54	Yes
TM2_BP_GO:0050678	TM2	BP	GO:0050678	regulation of epithelial cell proliferation	44/729	361/17051	3.72e-10	2.01e-08	1.43e-08	20317/56213/18654/20692/20315/21825/14734/20319/64103/20356/20292/12389/13052/22418/20377/11819/19378/74155/21808/235505/22160/21828/20682/56312/12192/18121/94275/13617/21803/14451/12828/211401/114142/13601/14184/17242/16193/12010/16476/14645/22339/12361/13057/15370	44	Yes
TM2_BP_GO:0050679	TM2	BP	GO:0050679	positive regulation of epithelial cell proliferation	25/729	199/17051	1.37e-06	2.84e-05	2.02e-05	56213/18654/20315/20356/20292/12389/13052/22418/20377/22160/21828/20682/18121/21803/14451/114142/13601/14184/17242/16193/16476/14645/22339/13057/15370	25	Yes
TM2_BP_GO:0050680	TM2	BP	GO:0050680	negative regulation of epithelial cell proliferation	22/729	143/17051	1.78e-07	4.6e-06	3.28e-06	20317/20692/21825/14734/20319/64103/12389/22418/20377/11819/21808/235505/20682/56312/94275/21803/14451/12828/211401/14184/12010/12361	22	Yes
TM2_BP_GO:0050727	TM2	BP	GO:0050727	regulation of inflammatory response	29/729	322/17051	0.000132793	0.00145107	0.00103513	20317/19223/54598/11820/22418/77125/18133/16803/20563/11421/56312/16835/242202/67389/20312/11539/18787/13617/15937/17242/12608/12505/12053/16193/21817/80859/17319/17470/21930	29	Yes
TM2_BP_GO:0050729	TM2	BP	GO:0050729	positive regulation of inflammatory response	16/729	125/17051	8.52e-05	0.00100682	0.000718218	11820/22418/77125/16803/11421/56312/16835/242202/18787/13617/17242/12608/16193/21817/80859/17319	16	Yes
TM2_BP_GO:0050730	TM2	BP	GO:0050730	regulation of peptidyl-tyrosine phosphorylation	30/729	255/17051	5.19e-07	1.19e-05	8.5e-06	17311/14456/67916/13640/20319/11820/12389/15200/19122/20377/18595/11804/74155/18590/11600/21828/71785/11421/18003/54635/12931/11539/18186/14573/21803/14184/12505/16193/22339/17319	30	Yes
TM2_BP_GO:0050731	TM2	BP	GO:0050731	positive regulation of peptidyl-tyrosine phosphorylation	22/729	189/17051	1.99e-05	0.000287697	0.00020523	17311/14456/67916/13640/11820/15200/19122/18595/11600/21828/11421/18003/12931/11539/18186/14573/21803/14184/12505/16193/22339/17319	22	No
TM2_BP_GO:0050767	TM2	BP	GO:0050767	regulation of neurogenesis	37/729	418/17051	2.41e-05	0.000336443	0.000240003	20317/14268/20315/13640/18208/15251/20356/20292/22418/17756/268902/77125/18845/19266/24136/18039/20563/11421/16835/18121/20312/20660/18186/76441/21803/16971/20482/14184/17242/18049/16193/12010/27279/22339/19716/12361/17190	37	Yes
TM2_BP_GO:0050769	TM2	BP	GO:0050769	positive regulation of neurogenesis	27/729	271/17051	4.09e-05	0.000530066	0.000378124	20317/14268/20315/13640/18208/15251/20356/268902/77125/18845/19266/24136/18039/11421/18121/20312/18186/21803/16971/20482/17242/18049/16193/27279/22339/19716/12361	27	No
TM2_BP_GO:0050770	TM2	BP	GO:0050770	regulation of axonogenesis	20/729	181/17051	9.77e-05	0.00113275	0.000808052	14268/20315/13640/18208/20356/12558/22418/17756/268902/18040/18845/24136/18039/20563/18186/16971/20482/18049/27279/22339	20	No
TM2_BP_GO:0050772	TM2	BP	GO:0050772	positive regulation of axonogenesis	15/729	98/17051	1.69e-05	0.0002539	0.000181121	14268/20315/13640/18208/20356/268902/18845/24136/18039/18186/16971/20482/18049/27279/22339	15	No
TM2_BP_GO:0050808	TM2	BP	GO:0050808	synapse organization	40/729	474/17051	3.41e-05	0.000450156	0.000321121	20692/64085/68792/13640/18208/18708/21826/11820/14735/12558/19122/22418/109711/16917/18027/330222/242384/19266/231637/11735/18039/80883/14658/21983/67533/14362/246316/72333/319387/18186/14573/208898/14062/219228/396184/59036/12361/22249/53378/22142	40	No
TM2_BP_GO:0050866	TM2	BP	GO:0050866	negative regulation of cell activation	20/729	205/17051	0.000515959	0.0044285	0.00315908	114886/15507/14190/20971/19122/20377/18595/18590/16835/242202/100952/20312/16854/21803/17131/17242/12608/12505/12053/17470	20	No
TM2_BP_GO:0050878	TM2	BP	GO:0050878	regulation of body fluid levels	29/729	317/17051	0.000101048	0.00114714	0.000818318	14268/14456/21825/12628/15251/232174/12389/18595/12496/12258/18590/18162/12671/27973/12583/14042/16531/11826/21419/14043/20312/12845/11539/18787/19128/14062/77446/22339/13057	29	Yes
TM2_BP_GO:0050885	TM2	BP	GO:0050885	neuromuscular process controlling balance	10/729	66/17051	0.000462884	0.00402166	0.00286887	11820/319984/11804/18039/108012/15211/16531/22295/15212/14667	10	No
TM2_BP_GO:0050890	TM2	BP	GO:0050890	cognition	32/729	324/17051	9.77e-06	0.000159913	0.000114074	20317/15251/11820/20292/19122/16917/319984/17967/21833/108012/11548/21983/16835/18121/242202/12288/16777/17159/11539/208431/114142/108073/14667/14266/17242/71175/18049/12010/16476/54720/98660/13653	32	No
TM2_BP_GO:0050900	TM2	BP	GO:0050900	leukocyte migration	45/729	347/17051	2.92e-11	2.27e-09	1.62e-09	17311/13616/14456/18654/20315/21825/12215/11815/11820/57266/20292/71660/13052/15945/22418/19035/77125/14825/18133/16803/20563/21828/71785/13479/14042/67374/100952/20312/16854/11539/18787/13617/19252/21803/12642/17387/13601/17242/227541/22339/17965/17319/17470/66102/20750	45	Yes
TM2_BP_GO:0050905	TM2	BP	GO:0050905	neuromuscular process	15/729	134/17051	0.000612164	0.00504476	0.0035987	18619/12628/11820/27386/319984/11804/18039/108012/15211/14658/16531/22295/12845/15212/14667	15	No
TM2_BP_GO:0050918	TM2	BP	GO:0050918	positive chemotaxis	10/729	45/17051	1.57e-05	0.000237741	0.000169593	18654/20315/20356/22418/11600/20312/16854/18186/16971/22339	10	Yes
TM2_BP_GO:0050919	TM2	BP	GO:0050919	negative chemotaxis	8/729	44/17051	0.000485442	0.00421028	0.00300342	18208/20564/22418/268902/18590/20563/22253/16410	8	No
TM2_BP_GO:0050920	TM2	BP	GO:0050920	regulation of chemotaxis	32/729	216/17051	7.85e-10	3.74e-08	2.67e-08	13616/14268/14456/18654/20315/21825/15507/20356/11820/57266/71660/15945/22418/268902/18595/18133/16803/20563/21828/71785/21983/20312/18787/18186/13617/19252/21803/17242/227541/22339/17965/17319	32	Yes
TM2_BP_GO:0050921	TM2	BP	GO:0050921	positive regulation of chemotaxis	26/729	143/17051	3.46e-10	1.9e-08	1.36e-08	13616/14268/14456/18654/20315/21825/15507/20356/11820/57266/71660/15945/22418/16803/20563/21828/71785/21983/20312/18787/18186/13617/21803/17242/227541/22339	26	Yes
TM2_BP_GO:0050922	TM2	BP	GO:0050922	negative regulation of chemotaxis	10/729	54/17051	8.33e-05	0.000988581	0.000705208	21825/20356/22418/268902/18133/20563/18186/19252/17965/17319	10	Yes
TM2_BP_GO:0051017	TM2	BP	GO:0051017	actin filament bundle assembly	25/729	166/17051	4.03e-08	1.18e-06	8.44e-07	14219/18708/20971/17926/109711/22003/21809/20194/102866/22240/109624/13717/20312/60595/18186/30794/22411/211401/16419/208177/14457/50768/11465/218194/11853	25	Yes
TM2_BP_GO:0051051	TM2	BP	GO:0051051	negative regulation of transport	37/729	474/17051	0.000318841	0.00299578	0.00213705	13616/21825/12955/11815/12389/14758/20377/18133/21808/22160/11735/11600/53322/11421/13121/231070/18769/16854/12798/11539/18605/20788/21803/108073/18704/29810/14783/14062/16193/16410/109731/98660/22038/17470/50790/53378/16790	37	No
TM2_BP_GO:0051058	TM2	BP	GO:0051058	negative regulation of small GTPase mediated signal transduction	10/729	61/17051	0.000239728	0.0023691	0.00169001	17926/21858/21808/20563/11548/12053/77446/24063/50768/24064	10	No
TM2_BP_GO:0051098	TM2	BP	GO:0051098	regulation of binding	32/729	381/17051	0.000221894	0.00221939	0.00158321	11820/54409/12389/22418/17756/11804/21808/66849/22160/13848/11600/20194/11421/242466/18121/109624/66573/20660/229534/67025/21803/16971/72701/18049/68010/12010/16476/83560/18793/59036/22038/17300	32	No
TM2_BP_GO:0051099	TM2	BP	GO:0051099	positive regulation of binding	20/729	189/17051	0.00017675	0.0018192	0.00129773	11820/54409/12389/22418/21808/22160/13848/20194/11421/109624/67025/21803/16971/72701/18049/68010/12010/18793/59036/17300	20	Yes
TM2_BP_GO:0051146	TM2	BP	GO:0051146	striated muscle cell differentiation	28/729	301/17051	9.95e-05	0.00114479	0.000816643	16011/20315/232174/12558/74116/13052/218772/15945/18595/18133/24052/13008/21833/11548/226101/12845/110196/11739/21803/17387/17886/13405/14200/16905/22339/11465/54720/12224	28	Yes
TM2_BP_GO:0051216	TM2	BP	GO:0051216	cartilage development	38/729	182/17051	2.49e-16	8.83e-14	6.3e-14	16007/21825/14219/12628/20319/12111/216616/12842/15251/18933/13038/218772/20289/15530/22418/110075/18133/21808/20204/21833/17132/20682/14042/18121/12167/16998/12845/21803/12006/21834/13601/17131/14184/17242/12406/239405/58250/12814	38	Yes
TM2_BP_GO:0051235	TM2	BP	GO:0051235	maintenance of location	30/729	306/17051	2.12e-05	0.000304103	0.000216933	14325/14319/268977/12389/15945/20192/21808/11735/21833/15211/231070/66573/20312/20660/80982/78610/18605/13617/20788/14118/21803/15212/14667/14062/13405/18049/16410/17965/19241/13057	30	Yes
TM2_BP_GO:0051271	TM2	BP	GO:0051271	negative regulation of cellular component movement	41/729	292/17051	1.83e-11	1.51e-09	1.08e-09	16011/114886/20317/13179/20315/21825/13134/20319/11815/20377/11819/109711/77125/18133/17684/22003/20563/13078/13479/18121/22240/100952/20312/11932/12798/11539/18787/60595/19252/22411/21803/16971/20733/208177/50768/12825/16449/17965/17319/17470/29876	41	Yes
TM2_BP_GO:0051346	TM2	BP	GO:0051346	negative regulation of hydrolase activity	39/729	348/17051	3.92e-08	1.16e-06	8.3e-07	20317/14456/21825/14734/20319/12955/13010/11820/74116/21858/232345/17756/12258/21808/235505/13479/209378/21859/11826/20660/18787/17872/27494/13601/338367/23980/56334/20733/12505/18049/16193/68581/12406/13014/24063/18793/22339/15370/24064	39	Yes
TM2_BP_GO:0051384	TM2	BP	GO:0051384	response to glucocorticoid	10/729	71/17051	0.000836391	0.00653439	0.00466133	11647/11670/18708/12583/11826/12192/14573/21803/16193/12193	10	No
TM2_BP_GO:0051402	TM2	BP	GO:0051402	neuron apoptotic process	28/729	297/17051	7.9e-05	0.000941608	0.000671699	15251/11820/19122/17748/21808/21809/18039/11600/16531/21419/20312/12931/18186/14573/108073/16971/21834/14184/17242/12608/14062/18049/16476/22339/13653/12804/170719/68169	28	Yes
TM2_BP_GO:0051492	TM2	BP	GO:0051492	regulation of stress fiber assembly	14/729	95/17051	4.96e-05	0.000619231	0.000441731	14219/18708/20971/17926/22003/21809/20194/18186/30794/22411/208177/50768/11465/11853	14	No
TM2_BP_GO:0051496	TM2	BP	GO:0051496	positive regulation of stress fiber assembly	10/729	56/17051	0.000114741	0.00126778	0.000904374	14219/20971/17926/22003/21809/20194/18186/30794/22411/11853	10	No
TM2_BP_GO:0051651	TM2	BP	GO:0051651	maintenance of location in cell	20/729	200/17051	0.000374889	0.00344412	0.00245688	14325/14319/12389/15945/20192/21808/11735/231070/20312/20660/80982/78610/13617/21803/14062/13405/18049/16410/19241/13057	20	Yes
TM2_BP_GO:0051781	TM2	BP	GO:0051781	positive regulation of cell division	10/729	69/17051	0.000664965	0.0054169	0.00386417	18654/21808/18590/21809/21828/71785/54635/21803/17242/22339	10	No
TM2_BP_GO:0051893	TM2	BP	GO:0051893	regulation of focal adhesion assembly	15/729	62/17051	3.61e-08	1.08e-06	7.69e-07	13640/107581/11815/20971/17926/14758/20194/18186/17387/16971/208177/50768/22339/11465/244895	15	Yes
TM2_BP_GO:0051894	TM2	BP	GO:0051894	positive regulation of focal adhesion assembly	6/729	27/17051	0.000819381	0.00642172	0.00458096	107581/20971/17926/20194/18186/22339	6	No
TM2_BP_GO:0051895	TM2	BP	GO:0051895	negative regulation of focal adhesion assembly	5/729	17/17051	0.000567543	0.00474004	0.00338132	11815/17387/16971/208177/50768	5	No
TM2_BP_GO:0051896	TM2	BP	GO:0051896	regulation of protein kinase B signaling	20/729	169/17051	3.69e-05	0.000483293	0.000344759	16011/14456/20315/21825/20356/17926/15200/17392/52377/18590/11600/12654/21983/67389/20312/21803/109042/16193/22339/24064	20	Yes
TM2_BP_GO:0051897	TM2	BP	GO:0051897	positive regulation of protein kinase B signaling	17/729	114/17051	6.77e-06	0.000116998	8.35e-05	16011/14456/20315/21825/20356/17926/15200/18590/11600/12654/21983/67389/20312/21803/16193/22339/24064	17	Yes
TM2_BP_GO:0051924	TM2	BP	GO:0051924	regulation of calcium ion transport	23/729	270/17051	0.00135033	0.00986016	0.00703378	20315/11931/107589/12389/19122/15945/319984/21808/11421/12288/20312/80982/16854/18787/13617/21803/213573/14062/13405/18049/98660/12361/13057	23	No
TM2_BP_GO:0051962	TM2	BP	GO:0051962	positive regulation of nervous system development	35/729	330/17051	7.33e-07	1.62e-05	1.15e-05	20317/14268/20315/64085/68792/13640/18208/18708/15251/21826/20356/268902/77125/18845/242384/19266/24136/18039/11421/21983/18121/20312/319387/18186/21803/16971/20482/17242/18049/396184/16193/27279/22339/19716/12361	35	Yes
TM2_BP_GO:0051963	TM2	BP	GO:0051963	regulation of synapse assembly	15/729	117/17051	0.000138119	0.00147357	0.00105118	64085/68792/13640/18208/18708/21826/11820/14735/22418/242384/19266/21983/14362/319387/396184	15	No
TM2_BP_GO:0052547	TM2	BP	GO:0052547	regulation of peptidase activity	41/729	364/17051	1.51e-08	5.08e-07	3.62e-07	20317/14456/16007/21825/14219/14734/20319/12955/13010/13036/11820/12389/74116/21858/232345/12258/52377/235505/13479/209378/21859/11826/215114/16913/20660/18787/12828/13601/23980/20733/14062/12505/18049/16193/68581/12406/13014/50768/18793/22339/15370	41	Yes
TM2_BP_GO:0052548	TM2	BP	GO:0052548	regulation of endopeptidase activity	28/729	307/17051	0.000139345	0.00148028	0.00105596	20317/14456/16007/21825/14219/20319/12955/11820/21858/12258/13479/21859/11826/215114/16913/20660/18787/12828/14062/12505/18049/16193/68581/12406/50768/18793/22339/15370	28	No
TM2_BP_GO:0055008	TM2	BP	GO:0055008	cardiac muscle tissue morphogenesis	11/729	64/17051	7.59e-05	0.000906891	0.000646934	22762/22418/21808/22003/11600/18121/21803/17131/77446/17300/12814	11	No
TM2_BP_GO:0055010	TM2	BP	GO:0055010	ventricular cardiac muscle tissue morphogenesis	9/729	48/17051	0.000170203	0.00176279	0.00125749	22762/21808/22003/18121/21803/17131/77446/17300/12814	9	No
TM2_BP_GO:0055017	TM2	BP	GO:0055017	cardiac muscle tissue growth	13/729	103/17051	0.000441594	0.00390508	0.0027857	22762/74116/13052/21808/17967/17684/11548/16526/18121/110196/11739/77446/17300	13	Yes
TM2_BP_GO:0055078	TM2	BP	GO:0055078	sodium ion homeostasis	10/729	55/17051	9.8e-05	0.00113275	0.000808052	11931/11421/14042/21419/14043/11932/11539/98660/20750/16790	10	No
TM2_BP_GO:0055117	TM2	BP	GO:0055117	regulation of cardiac muscle contraction	11/729	62/17051	5.6e-05	0.000691615	0.000493366	14219/11931/12389/11548/242202/12288/11539/17131/13405/56188/98660	11	No
TM2_BP_GO:0055123	TM2	BP	GO:0055123	digestive system development	20/729	122/17051	2.23e-07	5.56e-06	3.97e-06	20319/15251/71660/218772/22418/20377/19378/18595/18590/68151/14042/54635/14238/14184/18552/71175/329628/12825/59036/12224	20	Yes
TM2_BP_GO:0060021	TM2	BP	GO:0060021	roof of mouth development	12/729	96/17051	0.000790763	0.00624677	0.00445616	30953/18933/22418/18595/21808/21809/231070/14362/14238/22411/14451/231470	12	No
TM2_BP_GO:0060047	TM2	BP	GO:0060047	heart contraction	25/729	213/17051	4.76e-06	8.74e-05	6.23e-05	13616/14219/11931/18708/12389/13052/15200/21808/24052/12671/22003/21833/11421/14042/11548/242202/12288/14043/11539/21834/17131/23980/13405/56188/98660	25	No
TM2_BP_GO:0060070	TM2	BP	GO:0060070	canonical Wnt signaling pathway	32/729	280/17051	4.2e-07	9.79e-06	6.98e-06	67916/14734/20319/12842/20356/11820/12558/207181/12389/22418/20377/72293/56811/68151/21833/20682/14042/69217/18121/14362/83675/76441/22411/21803/12006/66042/14184/17242/68010/239405/59036/13653	32	Yes
TM2_BP_GO:0060071	TM2	BP	GO:0060071	Wnt signaling pathway, planar cell polarity pathway	8/729	36/17051	0.000112086	0.00124121	0.000885419	14734/20319/22418/20377/69217/14362/22411/59036	8	No
TM2_BP_GO:0060173	TM2	BP	GO:0060173	limb development	31/729	178/17051	2.21e-11	1.76e-09	1.26e-09	14734/20319/232174/18933/218772/20289/22418/11819/19378/16917/18845/21808/22160/20204/20682/14042/21419/18121/12288/12167/242022/12845/14451/230857/231470/110350/18552/71175/239405/58250/98711	31	Yes
TM2_BP_GO:0060323	TM2	BP	GO:0060323	head morphogenesis	11/729	45/17051	2.17e-06	4.36e-05	3.11e-05	12842/30953/20289/18595/17390/21808/21809/78892/18121/21803/71175	11	Yes
TM2_BP_GO:0060324	TM2	BP	GO:0060324	face development	13/729	60/17051	1.15e-06	2.42e-05	1.73e-05	12842/30953/20289/22418/19378/18595/17390/21808/21809/78892/18121/21803/71175	13	Yes
TM2_BP_GO:0060325	TM2	BP	GO:0060325	face morphogenesis	11/729	40/17051	6.01e-07	1.35e-05	9.67e-06	12842/30953/20289/18595/17390/21808/21809/78892/18121/21803/71175	11	Yes
TM2_BP_GO:0060326	TM2	BP	GO:0060326	cell chemotaxis	43/729	285/17051	4.9e-13	6.75e-11	4.81e-11	13616/14456/18654/20315/21825/15507/12215/20356/11820/57266/20292/71660/13052/15200/15945/22418/19035/18595/14825/18133/16803/20563/21828/71785/13479/21983/20312/16854/18787/18186/238130/13617/269608/19252/12642/17242/227541/22339/17965/15370/17319/66102/20750	43	Yes
TM2_BP_GO:0060343	TM2	BP	GO:0060343	trabecula formation	8/729	25/17051	6.08e-06	0.000105836	7.55e-05	12842/20377/11504/215798/17390/12643/14200/22339	8	Yes
TM2_BP_GO:0060346	TM2	BP	GO:0060346	bone trabecula formation	5/729	11/17051	5.25e-05	0.000652757	0.000465647	12842/20377/17390/12643/22339	5	Yes
TM2_BP_GO:0060348	TM2	BP	GO:0060348	bone development	34/729	218/17051	5.56e-11	3.78e-09	2.7e-09	20692/11647/21825/12628/20319/12111/12842/232174/17926/218772/20289/15530/19035/18590/17684/22160/27973/20682/14042/102866/231070/12643/12167/16998/14043/54635/12845/14118/12006/17387/14184/12406/329628/17300	34	Yes
TM2_BP_GO:0060349	TM2	BP	GO:0060349	bone morphogenesis	21/729	93/17051	2.71e-10	1.55e-08	1.1e-08	11647/21825/20319/12842/232174/218772/20289/15530/17684/22160/20682/14042/231070/16998/14043/12845/12006/17387/14184/12406/17300	21	Yes
TM2_BP_GO:0060350	TM2	BP	GO:0060350	endochondral bone morphogenesis	14/729	56/17051	6.58e-08	1.84e-06	1.31e-06	11647/21825/12842/218772/20289/15530/20682/14042/14043/12845/12006/17387/12406/17300	14	Yes
TM2_BP_GO:0060351	TM2	BP	GO:0060351	cartilage development involved in endochondral bone morphogenesis	9/729	33/17051	6.95e-06	0.000119329	8.51e-05	21825/12842/218772/15530/20682/14042/12845/12006/12406	9	Yes
TM2_BP_GO:0060389	TM2	BP	GO:0060389	pathway-restricted SMAD protein phosphorylation	11/729	60/17051	4.08e-05	0.000530066	0.000378124	73230/110075/21808/21809/18121/100952/65112/21803/17131/14560/53378	11	No
TM2_BP_GO:0060393	TM2	BP	GO:0060393	regulation of pathway-restricted SMAD protein phosphorylation	11/729	57/17051	2.47e-05	0.000341456	0.000243579	73230/110075/21808/21809/18121/100952/65112/21803/17131/14560/53378	11	No
TM2_BP_GO:0060395	TM2	BP	GO:0060395	SMAD protein signal transduction	12/729	82/17051	0.000180721	0.00185623	0.00132415	20742/110075/18133/21808/21809/15211/22057/21803/17131/14281/16476/14560	12	No
TM2_BP_GO:0060411	TM2	BP	GO:0060411	cardiac septum morphogenesis	15/729	78/17051	8.96e-07	1.92e-05	1.37e-05	16007/20564/22762/218772/22418/268902/21808/17684/20563/18121/14362/18186/22411/17131/16449	15	Yes
TM2_BP_GO:0060412	TM2	BP	GO:0060412	ventricular septum morphogenesis	11/729	44/17051	1.7e-06	3.47e-05	2.47e-05	20564/22762/22418/268902/21808/17684/20563/18121/14362/22411/17131	11	No
TM2_BP_GO:0060415	TM2	BP	GO:0060415	muscle tissue morphogenesis	15/729	73/17051	3.64e-07	8.59e-06	6.13e-06	22762/107589/22418/21808/22003/11600/18121/14362/21803/17131/58859/77446/12825/17300/12814	15	Yes
TM2_BP_GO:0060419	TM2	BP	GO:0060419	heart growth	13/729	112/17051	0.00098682	0.00756664	0.00539769	22762/74116/13052/21808/17967/17684/11548/16526/18121/110196/11739/77446/17300	13	No
TM2_BP_GO:0060425	TM2	BP	GO:0060425	lung morphogenesis	10/729	65/17051	0.000408114	0.00370815	0.00264523	13036/18595/20682/14042/18121/114142/24063/239405/24064/98711	10	No
TM2_BP_GO:0060428	TM2	BP	GO:0060428	lung epithelium development	8/729	48/17051	0.000889243	0.00687155	0.00490185	74155/52377/21833/20682/114142/21834/16598/14184	8	No
TM2_BP_GO:0060441	TM2	BP	GO:0060441	epithelial tube branching involved in lung morphogenesis	8/729	34/17051	7.25e-05	0.000873451	0.000623079	13036/18595/20682/14042/24063/239405/24064/98711	8	No
TM2_BP_GO:0060485	TM2	BP	GO:0060485	mesenchyme development	45/729	272/17051	4.43e-15	8.55e-13	6.1e-13	17311/13616/14268/67888/21825/20319/12842/15251/20356/12558/20289/22418/20377/19378/13876/268902/21808/17684/22160/24136/21809/20682/14042/12192/18121/13082/18186/13617/14573/22411/21803/12006/17131/17242/208177/16193/68010/24063/18793/22339/16449/24064/98711/17300/53378	45	Yes
TM2_BP_GO:0060512	TM2	BP	GO:0060512	prostate gland morphogenesis	6/729	29/17051	0.0012226	0.00909342	0.00648683	22418/20377/17390/20682/18121/12505	6	No
TM2_BP_GO:0060537	TM2	BP	GO:0060537	muscle tissue development	52/729	431/17051	1.31e-11	1.12e-09	8e-10	16011/30953/14733/22762/232174/107589/12389/74116/13052/218772/20289/15530/22418/11819/19378/18595/21808/24052/17967/17684/13008/22160/22003/11600/217082/20682/11548/56312/16526/18121/13717/110196/11739/21803/114142/20482/17131/14281/58859/13405/77446/14200/16905/12825/22339/54720/12224/15370/13653/243931/17300/12814	52	Yes
TM2_BP_GO:0060538	TM2	BP	GO:0060538	skeletal muscle organ development	20/729	181/17051	9.77e-05	0.00113275	0.000808052	14733/232174/12389/20289/11819/17684/22160/217082/56312/13717/21803/114142/20482/14281/13405/54720/12224/15370/13653/12804	20	Yes
TM2_BP_GO:0060541	TM2	BP	GO:0060541	respiratory system development	34/729	238/17051	6.21e-10	3.06e-08	2.18e-08	16011/20692/14219/14734/22762/13036/22418/19378/18595/319939/74155/52377/18590/21809/21833/12654/11421/20682/14042/18121/16998/21803/114142/17387/21834/16598/14184/77446/24063/239405/22339/24064/243931/98711	34	Yes
TM2_BP_GO:0060560	TM2	BP	GO:0060560	developmental growth involved in morphogenesis	30/729	263/17051	1e-06	2.12e-05	1.52e-05	14268/20315/13640/20319/18208/20564/50706/20356/11820/20292/22418/20377/17756/24136/20563/20682/14042/116837/18186/22411/21803/16971/13175/18049/396184/27279/24063/22339/24064/98711	30	Yes
TM2_BP_GO:0060562	TM2	BP	GO:0060562	epithelial tube morphogenesis	48/729	371/17051	6.84e-12	6.93e-10	4.94e-10	18654/20315/14734/20319/18208/12215/15251/13036/20356/20292/20971/15945/22418/20377/19378/18595/21808/17684/13800/22160/24136/20563/11600/20682/14042/18121/94275/14362/18186/13617/14573/21803/211401/17387/66042/56334/17242/20733/12505/329628/24063/50768/239405/22339/24064/98711/29876/16911	48	Yes
TM2_BP_GO:0060602	TM2	BP	GO:0060602	branch elongation of an epithelium	6/729	19/17051	0.000100611	0.00114479	0.000816643	22418/20682/21803/24063/24064/98711	6	No
TM2_BP_GO:0060606	TM2	BP	GO:0060606	tube closure	16/729	111/17051	1.94e-05	0.00028284	0.000201765	20319/20971/22418/20377/21808/17684/13800/22160/24136/18121/14362/21803/56334/20733/50768/16911	16	No
TM2_BP_GO:0060675	TM2	BP	GO:0060675	ureteric bud morphogenesis	10/729	64/17051	0.000358841	0.00330894	0.00236045	18654/14734/20682/18121/94275/14573/21803/12505/329628/22339	10	Yes
TM2_BP_GO:0060688	TM2	BP	GO:0060688	regulation of morphogenesis of a branching structure	14/729	62/17051	2.6e-07	6.35e-06	4.53e-06	18654/22418/20377/18595/18590/57764/20682/18121/94275/14573/21803/12876/17242/22339	14	Yes
TM2_BP_GO:0060740	TM2	BP	GO:0060740	prostate gland epithelium morphogenesis	6/729	28/17051	0.00100557	0.00765125	0.00545804	22418/20377/17390/20682/18121/12505	6	No
TM2_BP_GO:0060828	TM2	BP	GO:0060828	regulation of canonical Wnt signaling pathway	30/729	234/17051	7.81e-08	2.13e-06	1.52e-06	14734/20319/12842/20356/11820/12558/207181/12389/22418/20377/72293/56811/68151/21833/20682/69217/18121/14362/83675/76441/22411/21803/12006/66042/14184/17242/68010/239405/59036/13653	30	Yes
TM2_BP_GO:0060840	TM2	BP	GO:0060840	artery development	22/729	100/17051	1.75e-10	1.07e-08	7.64e-09	268977/107589/18933/268902/21808/17684/20204/21419/16835/18121/12845/18186/22411/16971/17131/58859/17242/15446/12825/22339/16449/17300	22	Yes
TM2_BP_GO:0060976	TM2	BP	GO:0060976	coronary vasculature development	12/729	73/17051	5.7e-05	0.000701346	0.000500307	14734/22762/268977/24052/11600/11421/18186/16971/110350/18552/22339/12224	12	Yes
TM2_BP_GO:0060993	TM2	BP	GO:0060993	kidney morphogenesis	12/729	92/17051	0.000536427	0.00455687	0.00325066	18654/14734/20682/18121/94275/14573/21803/231470/12505/329628/22339/243931	12	No
TM2_BP_GO:0061005	TM2	BP	GO:0061005	cell differentiation involved in kidney development	9/729	48/17051	0.000170203	0.00176279	0.00125749	18993/14042/70350/71602/14573/211401/329628/16449/243931	9	No
TM2_BP_GO:0061035	TM2	BP	GO:0061035	regulation of cartilage development	17/729	64/17051	9.28e-10	4.19e-08	2.99e-08	16007/14219/216616/13038/218772/20289/22418/21808/17132/20682/18121/16998/21803/12006/21834/17131/17242	17	Yes
TM2_BP_GO:0061036	TM2	BP	GO:0061036	positive regulation of cartilage development	7/729	27/17051	0.000106426	0.00119723	0.00085405	16007/20289/22418/20682/21834/17131/17242	7	Yes
TM2_BP_GO:0061037	TM2	BP	GO:0061037	negative regulation of cartilage development	7/729	28/17051	0.000136705	0.00146795	0.00104717	216616/13038/218772/21808/20682/18121/16998	7	No
TM2_BP_GO:0061041	TM2	BP	GO:0061041	regulation of wound healing	18/729	118/17051	2.62e-06	5.18e-05	3.69e-05	67916/21825/11475/107589/12389/15200/18595/12258/18590/235505/27973/18787/19128/14062/208177/27279/11465/12361	18	Yes
TM2_BP_GO:0061053	TM2	BP	GO:0061053	somite development	14/729	86/17051	1.57e-05	0.000237741	0.000169593	19363/20319/20289/22418/20377/68713/19378/18845/24136/18121/22411/12006/56334/17300	14	Yes
TM2_BP_GO:0061082	TM2	BP	GO:0061082	myeloid leukocyte cytokine production	7/729	31/17051	0.000271494	0.00263063	0.00187657	14456/22418/21808/21809/21803/12053/17319	7	No
TM2_BP_GO:0061138	TM2	BP	GO:0061138	morphogenesis of a branching epithelium	35/729	210/17051	4.15e-12	4.79e-10	3.42e-10	18654/20315/14734/20319/13036/20356/20292/22418/20377/18595/18590/20563/11600/57764/20682/14042/18121/94275/18186/13617/14573/21803/17387/17242/20733/12505/16193/329628/24063/21817/239405/22339/24064/98711/29876	35	Yes
TM2_BP_GO:0061298	TM2	BP	GO:0061298	retina vasculature development in camera-type eye	6/729	19/17051	0.000100611	0.00114479	0.000816643	15251/18595/80837/13078/18186/29876	6	No
TM2_BP_GO:0061299	TM2	BP	GO:0061299	retina vasculature morphogenesis in camera-type eye	4/729	11/17051	0.000859458	0.00666215	0.00475247	80837/13078/18186/29876	4	No
TM2_BP_GO:0061326	TM2	BP	GO:0061326	renal tubule development	15/729	95/17051	1.15e-05	0.000183188	0.000130678	18654/14734/18993/20682/11826/21419/18121/94275/14573/21803/211401/12505/329628/22339/16449	15	Yes
TM2_BP_GO:0061333	TM2	BP	GO:0061333	renal tubule morphogenesis	11/729	78/17051	0.000461479	0.00402166	0.00286887	18654/14734/20682/18121/94275/14573/21803/211401/12505/329628/22339	11	Yes
TM2_BP_GO:0061383	TM2	BP	GO:0061383	trabecula morphogenesis	12/729	50/17051	9.26e-07	1.98e-05	1.41e-05	12842/20377/11504/215798/17390/21808/18121/12643/14184/77446/14200/22339	12	Yes
TM2_BP_GO:0061430	TM2	BP	GO:0061430	bone trabecula morphogenesis	6/729	15/17051	2.15e-05	0.000307339	0.000219242	12842/20377/17390/12643/14184/22339	6	Yes
TM2_BP_GO:0061437	TM2	BP	GO:0061437	renal system vasculature development	6/729	27/17051	0.000819381	0.00642172	0.00458096	18595/11600/71785/11826/18186/13653	6	No
TM2_BP_GO:0061440	TM2	BP	GO:0061440	kidney vasculature development	6/729	27/17051	0.000819381	0.00642172	0.00458096	18595/11600/71785/11826/18186/13653	6	No
TM2_BP_GO:0061448	TM2	BP	GO:0061448	connective tissue development	46/729	253/17051	5.15e-17	1.96e-14	1.4e-14	16007/21825/14219/12628/20319/12111/216616/12842/15251/18933/13038/218772/20289/15530/22418/110075/18133/21808/20204/21833/71785/108012/17132/20682/14042/18121/12167/16998/114679/20660/12845/21803/12006/21834/13601/17131/12831/14184/17242/105171/16905/12406/239405/58250/13653/12814	46	Yes
TM2_BP_GO:0061458	TM2	BP	GO:0061458	reproductive system development	40/729	430/17051	3.45e-06	6.64e-05	4.74e-05	17311/20317/56213/16007/19223/20319/16157/53381/30953/15251/22762/14313/22418/20377/11819/11504/18595/17390/21808/17684/11600/20682/56312/12192/18121/12167/15081/18787/14238/56334/71175/20733/12608/12505/16410/16477/18793/22339/98711/17300	40	Yes
TM2_BP_GO:0061564	TM2	BP	GO:0061564	axon development	50/729	488/17051	9.57e-09	3.32e-07	2.37e-07	13723/14268/20315/13640/11658/18208/23964/12215/20564/20356/11820/12558/22418/17756/268902/18040/17390/18845/21808/12552/17967/13800/24136/11735/13848/18039/20563/13176/80883/14042/14009/11787/18121/12167/226251/16773/18186/14573/14451/16971/20482/14184/13175/18049/22253/16476/27279/22339/19716/17319	50	Yes
TM2_BP_GO:0061572	TM2	BP	GO:0061572	actin filament bundle organization	25/729	169/17051	5.79e-08	1.62e-06	1.16e-06	14219/18708/20971/17926/109711/22003/21809/20194/102866/22240/109624/13717/20312/60595/18186/30794/22411/211401/16419/208177/14457/50768/11465/218194/11853	25	Yes
TM2_BP_GO:0061614	TM2	BP	GO:0061614	pri-miRNA transcription by RNA polymerase II	10/729	57/17051	0.000133897	0.00145672	0.00103916	15251/11820/21808/20682/20788/21803/14281/16476/12224/13653	10	Yes
TM2_BP_GO:0062012	TM2	BP	GO:0062012	regulation of small molecule metabolic process	27/729	331/17051	0.00103897	0.00789328	0.0056307	16010/15251/11820/12389/72269/22160/53322/20682/11548/16531/56312/16835/231070/67389/110196/18605/20788/21834/15937/14783/16193/69183/54403/13653/17319/50790/98711	27	No
TM2_BP_GO:0070098	TM2	BP	GO:0070098	chemokine-mediated signaling pathway	9/729	56/17051	0.000566898	0.00474004	0.00338132	20315/20564/15251/20292/15945/14825/20563/20312/17300	9	Yes
TM2_BP_GO:0070167	TM2	BP	GO:0070167	regulation of biomineral tissue development	18/729	92/17051	5.56e-08	1.57e-06	1.12e-06	14456/16007/15251/27047/100038882/14758/22160/20682/12167/16998/12845/18605/21803/66695/13601/14184/12608/11732	18	Yes
TM2_BP_GO:0070168	TM2	BP	GO:0070168	negative regulation of biomineral tissue development	8/729	24/17051	4.29e-06	8.01e-05	5.72e-05	14456/15251/20682/16998/18605/21803/66695/13601	8	No
TM2_BP_GO:0070306	TM2	BP	GO:0070306	lens fiber cell differentiation	7/729	33/17051	0.000409453	0.00370871	0.00264562	24136/17132/21803/20482/14184/24063/24064	7	No
TM2_BP_GO:0070371	TM2	BP	GO:0070371	ERK1 and ERK2 cascade	47/729	317/17051	7.61e-14	1.22e-11	8.69e-12	14268/14456/20315/16007/14219/11475/13036/11820/20292/12389/83397/73230/18595/74155/18590/11600/13176/71785/12654/21859/20682/12192/21983/100952/20312/54635/18186/13617/19252/21803/109042/16971/230857/14783/14184/14062/13405/12505/18049/16193/16410/16476/24063/12193/22339/17319/24064	47	Yes
TM2_BP_GO:0070372	TM2	BP	GO:0070372	regulation of ERK1 and ERK2 cascade	41/729	298/17051	3.51e-11	2.6e-09	1.85e-09	14268/14456/20315/16007/14219/11475/11820/20292/12389/83397/73230/18595/74155/18590/11600/13176/71785/12654/21859/21983/100952/20312/54635/18186/13617/19252/21803/109042/16971/230857/14184/14062/13405/12505/18049/16193/16476/24063/22339/17319/24064	41	Yes
TM2_BP_GO:0070374	TM2	BP	GO:0070374	positive regulation of ERK1 and ERK2 cascade	31/729	205/17051	8.64e-10	4e-08	2.85e-08	14456/20315/14219/11475/11820/20292/83397/73230/18595/18590/11600/13176/71785/12654/21983/20312/54635/18186/13617/21803/109042/16971/14184/14062/12505/18049/16193/16476/22339/17319/24064	31	Yes
TM2_BP_GO:0070482	TM2	BP	GO:0070482	response to oxygen levels	24/729	221/17051	2.71e-05	0.000369846	0.000263831	18654/67749/19223/11670/12955/20657/11931/15251/12389/17390/21808/17684/22160/21809/16531/11826/12192/16526/11539/13617/230857/22339/13653/68169	24	Yes
TM2_BP_GO:0070831	TM2	BP	GO:0070831	basement membrane assembly	5/729	13/17051	0.000136145	0.00146511	0.00104514	54409/57764/80883/16777/208177	5	Yes
TM2_BP_GO:0070997	TM2	BP	GO:0070997	neuron death	40/729	413/17051	1.27e-06	2.65e-05	1.89e-05	12759/20317/15251/11820/19122/17748/22418/21808/231637/21809/18039/11600/13176/16531/21419/14362/20312/20660/12931/11539/18186/14573/108073/16971/21834/14281/66208/14184/17242/12608/14062/18049/16193/16476/22339/13653/12804/17470/170719/68169	40	Yes
TM2_BP_GO:0071214	TM2	BP	GO:0071214	cellular response to abiotic stimulus	23/729	252/17051	0.000528392	0.00449631	0.00320746	20319/12842/12955/18708/107589/12389/17392/20289/20377/17390/20682/11826/12192/76293/12798/13617/22411/21803/29810/71175/12925/98660/13653	23	Yes
TM2_BP_GO:0071229	TM2	BP	GO:0071229	cellular response to acid chemical	15/729	78/17051	8.96e-07	1.92e-05	1.37e-05	12843/107581/12842/17392/18595/17390/71785/20194/12833/54635/16598/12608/18049/12825/22339	15	Yes
TM2_BP_GO:0071230	TM2	BP	GO:0071230	cellular response to amino acid stimulus	11/729	66/17051	0.000101398	0.00114848	0.000819274	12843/107581/12842/17392/18595/17390/71785/12833/54635/12608/12825	11	No
TM2_BP_GO:0071260	TM2	BP	GO:0071260	cellular response to mechanical stimulus	10/729	32/17051	5.26e-07	1.2e-05	8.58e-06	12842/12389/20289/20682/11826/12798/13617/22411/29810/98660	10	Yes
TM2_BP_GO:0071396	TM2	BP	GO:0071396	cellular response to lipid	35/729	431/17051	0.000219502	0.0021999	0.0015693	12759/67749/13640/12628/11820/232174/15945/20377/19378/14825/17390/16803/20682/11826/12192/16835/231070/225998/14827/20312/18787/13082/14573/14469/21803/12608/16193/12010/12193/98660/56615/22038/17319/66102/20750	35	Yes
TM2_BP_GO:0071542	TM2	BP	GO:0071542	dopaminergic neuron differentiation	8/729	36/17051	0.000112086	0.00124121	0.000885419	20315/20319/15251/22418/20377/16917/239405/22339	8	Yes
TM2_BP_GO:0071559	TM2	BP	GO:0071559	response to transforming growth factor beta	40/729	212/17051	1.59e-15	3.42e-13	2.44e-13	56213/12843/11906/21825/268977/12389/20289/108075/68939/21808/235505/17684/21809/71785/20682/12192/12167/16998/100952/65112/18787/14573/14118/21803/66695/16419/20482/17131/80707/14281/12827/68010/16476/15446/24063/12825/12193/58250/24064/53378	40	Yes
TM2_BP_GO:0071560	TM2	BP	GO:0071560	cellular response to transforming growth factor beta stimulus	39/729	208/17051	4.48e-15	8.55e-13	6.1e-13	56213/12843/21825/268977/12389/20289/108075/68939/21808/235505/17684/21809/71785/20682/12192/12167/16998/100952/65112/18787/14573/14118/21803/66695/16419/20482/17131/80707/14281/12827/68010/16476/15446/24063/12825/12193/58250/24064/53378	39	Yes
TM2_BP_GO:0071604	TM2	BP	GO:0071604	transforming growth factor beta production	11/729	41/17051	7.9e-07	1.72e-05	1.23e-05	14268/21825/15251/268977/21808/17022/16998/20312/22411/16410/17470	11	Yes
TM2_BP_GO:0071621	TM2	BP	GO:0071621	granulocyte chemotaxis	20/729	120/17051	1.69e-07	4.38e-06	3.12e-06	13616/21825/12215/20292/71660/13052/15945/19035/14825/16803/20563/21828/13479/20312/16854/13617/17242/227541/22339/20750	20	Yes
TM2_BP_GO:0071622	TM2	BP	GO:0071622	regulation of granulocyte chemotaxis	9/729	55/17051	0.00049423	0.00426413	0.00304183	21825/71660/16803/20563/21828/20312/13617/17242/227541	9	No
TM2_BP_GO:0071634	TM2	BP	GO:0071634	regulation of transforming growth factor beta production	10/729	39/17051	3.95e-06	7.45e-05	5.32e-05	14268/21825/15251/268977/21808/17022/20312/22411/16410/17470	10	Yes
TM2_BP_GO:0071636	TM2	BP	GO:0071636	positive regulation of transforming growth factor beta production	5/729	19/17051	0.000993275	0.00760438	0.00542461	21825/17022/20312/22411/17470	5	No
TM2_BP_GO:0071674	TM2	BP	GO:0071674	mononuclear cell migration	26/729	164/17051	7.22e-09	2.6e-07	1.85e-07	14456/20315/21825/11815/11820/57266/20292/71660/15945/22418/18133/20563/71785/14042/67374/20312/16854/18787/19252/21803/12642/13601/17242/17965/17470/66102	26	Yes
TM2_BP_GO:0071675	TM2	BP	GO:0071675	regulation of mononuclear cell migration	22/729	108/17051	8.39e-10	3.93e-08	2.8e-08	14456/20315/21825/11815/11820/57266/71660/15945/22418/18133/20563/71785/67374/20312/16854/18787/19252/21803/13601/17242/17965/17470	22	Yes
TM2_BP_GO:0071676	TM2	BP	GO:0071676	negative regulation of mononuclear cell migration	6/729	19/17051	0.000100611	0.00114479	0.000816643	11815/18133/20563/19252/17965/17470	6	Yes
TM2_BP_GO:0071677	TM2	BP	GO:0071677	positive regulation of mononuclear cell migration	11/729	64/17051	7.59e-05	0.000906891	0.000646934	14456/20315/11820/57266/15945/22418/71785/67374/16854/18787/21803	11	No
TM2_BP_GO:0071679	TM2	BP	GO:0071679	commissural neuron axon guidance	4/729	12/17051	0.00124577	0.00916954	0.00654113	17967/18186/14573/22339	4	Yes
TM2_BP_GO:0071692	TM2	BP	GO:0071692	protein localization to extracellular region	30/729	372/17051	0.000676417	0.00550116	0.00392427	13640/12215/15251/268977/20377/18133/94353/21808/52377/68151/21809/13121/21419/12288/67389/12845/14118/21803/16971/19285/68428/14062/16193/68581/14645/17965/12361/17470/22249/50790	30	Yes
TM2_BP_GO:0071706	TM2	BP	GO:0071706	tumor necrosis factor superfamily cytokine production	18/729	173/17051	0.000449689	0.00395551	0.00282168	12759/14456/21825/15507/18708/11820/22418/83397/77125/74155/16803/22160/11600/20312/16193/71586/13057/17319	18	Yes
TM2_BP_GO:0071711	TM2	BP	GO:0071711	basement membrane organization	8/729	30/17051	2.72e-05	0.000369846	0.000263831	54409/12389/57764/80883/14042/16777/20733/208177	8	Yes
TM2_BP_GO:0071772	TM2	BP	GO:0071772	response to BMP	30/729	157/17051	4.04e-12	4.77e-10	3.4e-10	56213/67888/16007/14734/20319/12389/14313/20289/22418/20377/73230/21808/21809/14042/21419/18121/12167/14362/20660/12845/22057/14118/21803/50766/20482/17131/66042/68010/17965/13653	30	Yes
TM2_BP_GO:0071773	TM2	BP	GO:0071773	cellular response to BMP stimulus	30/729	157/17051	4.04e-12	4.77e-10	3.4e-10	56213/67888/16007/14734/20319/12389/14313/20289/22418/20377/73230/21808/21809/14042/21419/18121/12167/14362/20660/12845/22057/14118/21803/50766/20482/17131/66042/68010/17965/13653	30	Yes
TM2_BP_GO:0071774	TM2	BP	GO:0071774	response to fibroblast growth factor	20/729	90/17051	9.77e-10	4.37e-08	3.11e-08	21825/14219/14733/22418/20377/14042/12192/18121/14043/26427/14184/12505/396184/329628/24063/12193/15936/15370/24064/68169	20	Yes
TM2_BP_GO:0071838	TM2	BP	GO:0071838	cell proliferation in bone marrow	4/729	11/17051	0.000859458	0.00666215	0.00475247	11421/16854/14184/16193	4	No
TM2_BP_GO:0071900	TM2	BP	GO:0071900	regulation of protein serine/threonine kinase activity	32/729	417/17051	0.00105024	0.0079546	0.00567444	17311/13616/21825/20319/11820/16012/12389/22418/20377/11819/18590/24136/21809/71785/242202/94275/20660/54635/18769/80982/78610/19252/21803/74055/81877/77446/69183/24063/22339/17319/24064/23882	32	No
TM2_BP_GO:0072001	TM2	BP	GO:0072001	renal system development	56/729	312/17051	3.41e-20	2.42e-17	1.72e-17	18654/14734/12628/18993/30953/218772/22418/20377/73230/19378/268902/12829/11504/18595/18027/21808/18590/20563/11600/71785/11421/20682/14042/11826/21419/18121/94275/70350/83675/242022/12931/71602/18186/13617/14573/22411/14118/21803/12828/211401/17131/74055/231470/110350/18552/12505/18073/329628/24063/22339/16449/13653/243931/98711/20750/17300	56	Yes
TM2_BP_GO:0072006	TM2	BP	GO:0072006	nephron development	28/729	142/17051	9.57e-12	9e-10	6.42e-10	18654/14734/12628/18993/12829/18595/11600/71785/20682/14042/11826/21419/18121/94275/70350/71602/14573/21803/12828/211401/74055/12505/18073/329628/22339/16449/13653/17300	28	Yes
TM2_BP_GO:0072009	TM2	BP	GO:0072009	nephron epithelium development	19/729	102/17051	5.48e-08	1.55e-06	1.11e-06	18654/14734/18993/20682/14042/11826/21419/18121/94275/70350/71602/14573/21803/211401/12505/329628/22339/16449/17300	19	Yes
TM2_BP_GO:0072010	TM2	BP	GO:0072010	glomerular epithelium development	5/729	17/17051	0.000567543	0.00474004	0.00338132	14042/70350/71602/16449/17300	5	No
TM2_BP_GO:0072073	TM2	BP	GO:0072073	kidney epithelium development	28/729	136/17051	3.18e-12	3.95e-10	2.82e-10	18654/14734/18993/218772/20377/73230/268902/20563/20682/14042/11826/21419/18121/94275/70350/12931/71602/14573/21803/211401/17131/12505/329628/24063/22339/16449/243931/17300	28	Yes
TM2_BP_GO:0072078	TM2	BP	GO:0072078	nephron tubule morphogenesis	10/729	72/17051	0.000934821	0.00721252	0.00514507	18654/14734/20682/18121/94275/14573/21803/12505/329628/22339	10	Yes
TM2_BP_GO:0072080	TM2	BP	GO:0072080	nephron tubule development	15/729	89/17051	5.06e-06	9.12e-05	6.51e-05	18654/14734/18993/20682/11826/21419/18121/94275/14573/21803/211401/12505/329628/22339/16449	15	Yes
TM2_BP_GO:0072088	TM2	BP	GO:0072088	nephron epithelium morphogenesis	10/729	74/17051	0.00116022	0.00872101	0.00622116	18654/14734/20682/18121/94275/14573/21803/12505/329628/22339	10	Yes
TM2_BP_GO:0072132	TM2	BP	GO:0072132	mesenchyme morphogenesis	9/729	49/17051	0.000200693	0.00204024	0.00145542	67888/22418/268902/21808/22160/20682/18121/22411/17300	9	Yes
TM2_BP_GO:0072163	TM2	BP	GO:0072163	mesonephric epithelium development	20/729	96/17051	3.25e-09	1.32e-07	9.43e-08	18654/14734/218772/20377/73230/268902/20563/20682/18121/94275/12931/14573/21803/17131/12505/329628/24063/22339/243931/17300	20	Yes
TM2_BP_GO:0072164	TM2	BP	GO:0072164	mesonephric tubule development	20/729	96/17051	3.25e-09	1.32e-07	9.43e-08	18654/14734/218772/20377/73230/268902/20563/20682/18121/94275/12931/14573/21803/17131/12505/329628/24063/22339/243931/17300	20	Yes
TM2_BP_GO:0072170	TM2	BP	GO:0072170	metanephric tubule development	5/729	20/17051	0.00127818	0.00938026	0.00669144	18993/20682/11826/211401/329628	5	No
TM2_BP_GO:0072171	TM2	BP	GO:0072171	mesonephric tubule morphogenesis	10/729	65/17051	0.000408114	0.00370815	0.00264523	18654/14734/20682/18121/94275/14573/21803/12505/329628/22339	10	Yes
TM2_BP_GO:0072175	TM2	BP	GO:0072175	epithelial tube formation	20/729	159/17051	1.51e-05	0.000231408	0.000165076	20319/15251/20971/22418/20377/21808/17684/13800/22160/24136/20682/18121/14362/14573/21803/56334/20733/50768/22339/16911	20	No
TM2_BP_GO:0072507	TM2	BP	GO:0072507	divalent inorganic cation homeostasis	37/729	499/17051	0.000836091	0.00653439	0.00466133	13616/11931/11820/12389/19122/17748/15945/22418/18595/14825/20192/21808/24052/11735/53322/11548/21419/12288/22295/20312/80982/69048/13617/21803/211401/16971/15212/14062/13405/18049/17750/16410/56188/21817/98660/13057/20750	37	No
TM2_BP_GO:0072676	TM2	BP	GO:0072676	lymphocyte migration	15/729	100/17051	2.17e-05	0.000309349	0.000220675	14456/20315/11815/11820/57266/20292/15945/22418/14042/67374/20312/12642/13601/17470/66102	15	Yes
TM2_BP_GO:0085029	TM2	BP	GO:0085029	extracellular matrix assembly	17/729	41/17051	2.57e-13	3.86e-11	2.75e-11	12843/23876/54409/14758/108075/207596/57764/80883/20682/16777/16998/76293/100952/21803/81877/58859/208177	17	Yes
TM2_BP_GO:0090025	TM2	BP	GO:0090025	regulation of monocyte chemotaxis	8/729	27/17051	1.16e-05	0.000183188	0.000130678	20315/11820/15945/18133/20563/18787/19252/17965	8	Yes
TM2_BP_GO:0090090	TM2	BP	GO:0090090	negative regulation of canonical Wnt signaling pathway	20/729	124/17051	2.93e-07	7.02e-06	5.01e-06	14734/20319/11820/12558/207181/12389/22418/20377/72293/56811/20682/18121/14362/83675/22411/12006/66042/17242/59036/13653	20	Yes
TM2_BP_GO:0090092	TM2	BP	GO:0090092	regulation of transmembrane receptor protein serine/threonine kinase signaling pathway	39/729	237/17051	3.68e-13	5.22e-11	3.72e-11	56213/16007/21825/14734/20319/268977/12389/14313/22418/20377/73230/68939/110075/18133/21808/235505/17684/21809/21419/18121/100952/14362/20660/65112/22057/14118/21803/66695/50766/20482/17131/66042/68010/14560/24063/17965/58250/24064/53378	39	Yes
TM2_BP_GO:0090101	TM2	BP	GO:0090101	negative regulation of transmembrane receptor protein serine/threonine kinase signaling pathway	29/729	119/17051	1.27e-14	2.34e-12	1.67e-12	56213/20319/268977/12389/14313/22418/20377/73230/68939/18133/235505/21809/18121/100952/14362/20660/65112/22057/14118/66695/50766/20482/17131/66042/68010/24063/17965/58250/24064	29	Yes
TM2_BP_GO:0090109	TM2	BP	GO:0090109	regulation of cell-substrate junction assembly	15/729	62/17051	3.61e-08	1.08e-06	7.69e-07	13640/107581/11815/20971/17926/14758/20194/18186/17387/16971/208177/50768/22339/11465/244895	15	Yes
TM2_BP_GO:0090130	TM2	BP	GO:0090130	tissue migration	39/729	293/17051	2.88e-10	1.63e-08	1.16e-08	20317/13179/20692/67916/68792/21825/15507/12215/15251/13036/20356/15200/22418/68813/73230/11819/18133/21808/24136/20563/11600/80837/13078/20682/11826/18787/18186/269608/21803/17886/27494/14389/18704/16410/16476/14645/14089/22339/15370	39	Yes
TM2_BP_GO:0090132	TM2	BP	GO:0090132	epithelium migration	39/729	292/17051	2.6e-10	1.5e-08	1.07e-08	20317/13179/20692/67916/68792/21825/15507/12215/15251/13036/20356/15200/22418/68813/73230/11819/18133/21808/24136/20563/11600/80837/13078/20682/11826/18787/18186/269608/21803/17886/27494/14389/18704/16410/16476/14645/14089/22339/15370	39	Yes
TM2_BP_GO:0090136	TM2	BP	GO:0090136	epithelial cell-cell adhesion	5/729	16/17051	0.000415145	0.00370871	0.00264562	64817/18133/13078/21828/16419	5	No
TM2_BP_GO:0090175	TM2	BP	GO:0090175	regulation of establishment of planar polarity	8/729	41/17051	0.000293025	0.0027902	0.0019904	14734/20319/22418/20377/69217/14362/22411/59036	8	No
TM2_BP_GO:0090183	TM2	BP	GO:0090183	regulation of kidney development	7/729	32/17051	0.00033482	0.00309896	0.00221066	20682/18121/94275/13617/14573/21803/22339	7	No
TM2_BP_GO:0090189	TM2	BP	GO:0090189	regulation of branching involved in ureteric bud morphogenesis	6/729	23/17051	0.000323337	0.00301524	0.00215093	20682/18121/94275/14573/21803/22339	6	No
TM2_BP_GO:0090190	TM2	BP	GO:0090190	positive regulation of branching involved in ureteric bud morphogenesis	6/729	21/17051	0.000187003	0.00191678	0.00136734	20682/18121/94275/14573/21803/22339	6	No
TM2_BP_GO:0090257	TM2	BP	GO:0090257	regulation of muscle system process	27/729	230/17051	1.99e-06	4.04e-05	2.88e-05	16011/14219/11931/54598/11534/12389/74116/68813/74155/12671/11548/16531/242202/12288/109624/11539/110196/238130/11739/17131/230857/14062/13405/60596/16905/56188/98660	27	No
TM2_BP_GO:0090263	TM2	BP	GO:0090263	positive regulation of canonical Wnt signaling pathway	16/729	106/17051	1.07e-05	0.000172121	0.000122783	14734/20319/12842/20356/12389/20377/56811/68151/21833/69217/76441/21803/14184/68010/239405/59036	16	Yes
TM2_BP_GO:0090287	TM2	BP	GO:0090287	regulation of cellular response to growth factor stimulus	49/729	280/17051	2.45e-17	1.01e-14	7.22e-15	56213/13179/16007/21825/14734/20319/64103/14733/15251/268977/12389/14313/22418/20377/73230/68939/235505/17684/21809/20563/11600/12509/21419/18121/226101/100952/14362/20660/65112/22057/14118/21803/26427/66695/50766/20482/17131/66042/14783/13405/18049/68010/21413/24063/17965/12361/58250/24064/53378	49	Yes
TM2_BP_GO:0090288	TM2	BP	GO:0090288	negative regulation of cellular response to growth factor stimulus	28/729	100/17051	7.57e-16	1.88e-13	1.34e-13	56213/13179/21825/20319/64103/14733/12389/22418/20377/73230/20563/12509/18121/100952/14362/20660/22057/14118/26427/50766/20482/17131/66042/68010/24063/17965/12361/24064	28	Yes
TM2_BP_GO:0090594	TM2	BP	GO:0090594	inflammatory response to wounding	5/729	18/17051	0.000758363	0.00603891	0.00430788	12628/15251/17242/14062/12505	5	Yes
TM2_BP_GO:0090596	TM2	BP	GO:0090596	sensory organ morphogenesis	33/729	289/17051	2.83e-07	6.82e-06	4.87e-06	329941/12628/18208/15251/232174/18933/14107/218772/22418/330222/17684/22160/20204/50530/20682/11826/18121/231070/17150/225998/12837/22295/14238/14451/21834/320398/12831/14184/71175/22339/16449/24064/12814	33	Yes
TM2_BP_GO:0097084	TM2	BP	GO:0097084	vascular associated smooth muscle cell development	4/729	12/17051	0.00124577	0.00916954	0.00654113	54409/12845/58859/22339	4	No
TM2_BP_GO:0097191	TM2	BP	GO:0097191	extrinsic apoptotic signaling pathway	29/729	226/17051	1.26e-07	3.36e-06	2.4e-06	17311/21825/20319/18708/12389/51795/20377/77125/21808/21859/12167/14827/20312/16854/18787/18186/14573/21803/14451/20482/80707/29810/64294/14184/18049/16905/16410/27279/22339	29	Yes
TM2_BP_GO:0097201	TM2	BP	GO:0097201	negative regulation of transcription from RNA polymerase II promoter in response to stress	5/729	13/17051	0.000136145	0.00146511	0.00104514	17684/17872/29810/16476/81489	5	Yes
TM2_BP_GO:0097205	TM2	BP	GO:0097205	renal filtration	7/729	24/17051	4.64e-05	0.000589519	0.000420535	14456/11826/11539/71602/13617/14062/13057	7	No
TM2_BP_GO:0097485	TM2	BP	GO:0097485	neuron projection guidance	33/729	229/17051	8.85e-10	4.03e-08	2.87e-08	13723/20315/13640/11658/18208/23964/12215/20564/20356/11820/22418/268902/18845/21808/17967/13800/11735/13848/20563/13176/14042/14009/11787/18121/12167/226251/16773/18186/14573/14451/16971/22253/22339	33	Yes
TM2_BP_GO:0097529	TM2	BP	GO:0097529	myeloid leukocyte migration	32/729	207/17051	2.59e-10	1.5e-08	1.07e-08	13616/18654/20315/21825/12215/11820/20292/71660/13052/15945/19035/14825/18133/16803/20563/21828/71785/13479/100952/20312/16854/18787/13617/19252/17387/17242/227541/22339/17965/17319/17470/20750	32	Yes
TM2_BP_GO:0097530	TM2	BP	GO:0097530	granulocyte migration	20/729	143/17051	2.96e-06	5.76e-05	4.11e-05	13616/21825/12215/20292/71660/13052/15945/19035/14825/16803/20563/21828/13479/20312/16854/13617/17242/227541/22339/20750	20	Yes
TM2_BP_GO:0097746	TM2	BP	GO:0097746	blood vessel diameter maintenance	29/729	152/17051	9.61e-12	9e-10	6.42e-10	13616/11475/20657/15251/12389/68813/17390/27360/12671/58861/11421/14042/11548/16531/242202/12288/14043/20312/12845/11539/74617/238130/13617/230857/16598/14062/60596/98660/17300	29	Yes
TM2_BP_GO:0098742	TM2	BP	GO:0098742	cell-cell adhesion via plasma-membrane adhesion molecules	22/729	201/17051	5.15e-05	0.000641961	0.000457945	13723/64085/13640/11658/23964/12215/14735/12558/13052/268902/330222/21808/19266/12552/224024/80883/22295/20312/72333/319387/219228/329628	22	Yes
TM2_BP_GO:0098743	TM2	BP	GO:0098743	cell aggregation	6/729	18/17051	7.14e-05	0.000861976	0.000614894	14219/21808/21833/20682/12167/12814	6	No
TM2_BP_GO:0098868	TM2	BP	GO:0098868	bone growth	7/729	30/17051	0.000218162	0.0021909	0.00156289	21825/23876/218772/20682/14042/12845/13601	7	Yes
TM2_BP_GO:0104004	TM2	BP	GO:0104004	cellular response to environmental stimulus	23/729	252/17051	0.000528392	0.00449631	0.00320746	20319/12842/12955/18708/107589/12389/17392/20289/20377/17390/20682/11826/12192/76293/12798/13617/22411/21803/29810/71175/12925/98660/13653	23	Yes
TM2_BP_GO:0110020	TM2	BP	GO:0110020	regulation of actomyosin structure organization	14/729	106/17051	0.000166221	0.0017324	0.00123581	14219/18708/20971/17926/22003/21809/20194/18186/30794/22411/208177/50768/11465/11853	14	No
TM2_BP_GO:0110053	TM2	BP	GO:0110053	regulation of actin filament organization	27/729	267/17051	3.15e-05	0.000422697	0.000301532	14219/18708/20742/20356/20292/20971/17926/231637/27360/22003/21809/20563/20194/13717/20312/18186/30794/22411/170643/211401/58804/208177/50768/11465/56431/19241/11853	27	Yes
TM2_BP_GO:0110110	TM2	BP	GO:0110110	positive regulation of animal organ morphogenesis	8/729	37/17051	0.000137702	0.00147228	0.00105025	22418/268902/20682/13617/14573/22411/21803/24063	8	Yes
TM2_BP_GO:0110148	TM2	BP	GO:0110148	biomineralization	27/729	153/17051	3.19e-10	1.78e-08	1.27e-08	14456/12843/16007/14734/12842/15251/27047/100038882/14758/22160/20682/12167/16998/12845/18605/22411/21803/211401/12006/66695/13601/14184/12608/70370/239405/11732/20750	27	Yes
TM2_BP_GO:0110149	TM2	BP	GO:0110149	regulation of biomineralization	19/729	94/17051	1.36e-08	4.59e-07	3.27e-07	14456/16007/15251/27047/100038882/14758/22160/20682/12167/16998/12845/18605/21803/66695/13601/14184/12608/70370/11732	19	Yes
TM2_BP_GO:0110150	TM2	BP	GO:0110150	negative regulation of biomineralization	8/729	25/17051	6.08e-06	0.000105836	7.55e-05	14456/15251/20682/16998/18605/21803/66695/13601	8	No
TM2_BP_GO:0150063	TM2	BP	GO:0150063	visual system development	48/729	388/17051	3.42e-11	2.57e-09	1.83e-09	329941/12628/12955/12215/15251/14107/218772/19378/16917/18595/330222/23928/21808/17684/22160/24136/50530/80837/13078/17132/20682/11826/18081/12288/12167/17150/225998/12837/242022/18186/14238/21803/14451/114142/20482/21834/12831/14184/71175/18516/16476/24063/22339/16449/24064/98711/29876/17300	48	Yes
TM2_BP_GO:0150115	TM2	BP	GO:0150115	cell-substrate junction organization	20/729	98/17051	4.75e-09	1.85e-07	1.32e-07	14268/13640/107581/18708/11815/20971/17926/14758/109711/20194/18186/17387/16971/208177/16410/50768/22339/11465/244895/226519	20	Yes
TM2_BP_GO:0150116	TM2	BP	GO:0150116	regulation of cell-substrate junction organization	16/729	67/17051	1.55e-08	5.15e-07	3.67e-07	13640/107581/18708/11815/20971/17926/14758/20194/18186/17387/16971/208177/50768/22339/11465/244895	16	Yes
TM2_BP_GO:0150117	TM2	BP	GO:0150117	positive regulation of cell-substrate junction organization	7/729	32/17051	0.00033482	0.00309896	0.00221066	107581/18708/20971/17926/20194/18186/22339	7	No
TM2_BP_GO:0150118	TM2	BP	GO:0150118	negative regulation of cell-substrate junction organization	5/729	17/17051	0.000567543	0.00474004	0.00338132	11815/17387/16971/208177/50768	5	No
TM2_BP_GO:0198738	TM2	BP	GO:0198738	cell-cell signaling by wnt	45/729	407/17051	5.31e-09	2.01e-07	1.43e-07	67916/14734/20319/12842/20356/11820/14735/12558/17926/207181/12389/22418/20377/56332/24117/242939/72293/56811/68151/24136/21833/20682/14042/69217/18121/26563/14362/83675/76441/22411/21803/12006/16971/66042/80707/12876/14783/14184/17242/12505/672511/68010/239405/59036/13653	45	Yes
TM2_BP_GO:1900024	TM2	BP	GO:1900024	regulation of substrate adhesion-dependent cell spreading	9/729	58/17051	0.000738527	0.00591895	0.0042223	13640/50706/17926/68813/20194/18003/60595/18186/17242	9	No
TM2_BP_GO:1900046	TM2	BP	GO:1900046	regulation of hemostasis	10/729	62/17051	0.000275052	0.00265268	0.0018923	21825/12389/18595/12258/18590/27973/12845/18787/19128/14062	10	Yes
TM2_BP_GO:1901136	TM2	BP	GO:1901136	carbohydrate derivative catabolic process	17/729	127/17051	2.89e-05	0.000391043	0.000278952	14733/13010/71665/72269/83921/18573/12654/15211/242202/80982/21803/15212/14667/71207/12505/110074/18950	17	No
TM2_BP_GO:1901214	TM2	BP	GO:1901214	regulation of neuron death	39/729	374/17051	2.66e-07	6.46e-06	4.61e-06	12759/20317/15251/11820/19122/17748/22418/21808/231637/21809/18039/11600/13176/16531/21419/14362/20312/20660/12931/11539/18186/14573/108073/16971/14281/66208/14184/17242/12608/14062/18049/16193/16476/22339/13653/12804/17470/170719/68169	39	Yes
TM2_BP_GO:1901215	TM2	BP	GO:1901215	negative regulation of neuron death	28/729	249/17051	3.03e-06	5.85e-05	4.17e-05	20317/15251/11820/17748/21809/18039/11600/21419/14362/20312/20660/12931/18186/14573/108073/16971/66208/17242/12608/14062/18049/16193/16476/22339/12804/17470/170719/68169	28	No
TM2_BP_GO:1901342	TM2	BP	GO:1901342	regulation of vasculature development	47/729	285/17051	1.22e-15	2.88e-13	2.05e-13	20317/13179/18654/20692/21825/23876/19223/20319/15507/64103/15251/21826/13036/20356/20292/54409/15945/22418/73230/11504/21808/58861/80837/12509/13078/12654/11826/100952/20312/16854/18787/18186/12828/26427/27494/13601/16598/12827/18746/17242/21413/14645/27279/22339/24064/12226/17300	47	Yes
TM2_BP_GO:1901343	TM2	BP	GO:1901343	negative regulation of vasculature development	21/729	109/17051	5.86e-09	2.15e-07	1.54e-07	20317/13179/20692/21825/23876/64103/21826/15945/11504/21808/12509/100952/18787/12828/26427/27494/16598/12827/21413/24064/17300	21	Yes
TM2_BP_GO:1901888	TM2	BP	GO:1901888	regulation of cell junction assembly	31/729	211/17051	1.78e-09	7.68e-08	5.48e-08	64085/68792/13640/107581/18208/18708/11815/21826/11820/14735/20971/17926/12389/22418/14758/242384/19266/20194/11421/21983/14362/319387/18186/17387/16971/208177/396184/50768/22339/11465/244895	31	Yes
TM2_BP_GO:1901889	TM2	BP	GO:1901889	negative regulation of cell junction assembly	7/729	31/17051	0.000271494	0.00263063	0.00187657	11815/22418/11421/17387/16971/208177/50768	7	No
TM2_BP_GO:1901890	TM2	BP	GO:1901890	positive regulation of cell junction assembly	17/729	117/17051	9.66e-06	0.000158707	0.000113214	64085/68792/13640/107581/18708/21826/20971/17926/12389/242384/19266/20194/21983/319387/18186/396184/22339	17	No
TM2_BP_GO:1902041	TM2	BP	GO:1902041	regulation of extrinsic apoptotic signaling pathway via death domain receptors	8/729	45/17051	0.000568597	0.00474086	0.00338191	21825/20319/20377/21859/12167/16854/18787/20482	8	Yes
TM2_BP_GO:1902043	TM2	BP	GO:1902043	positive regulation of extrinsic apoptotic signaling pathway via death domain receptors	5/729	14/17051	0.000204347	0.0020605	0.00146987	21825/20377/21859/12167/20482	5	Yes
TM2_BP_GO:1902105	TM2	BP	GO:1902105	regulation of leukocyte differentiation	26/729	290/17051	0.000311538	0.00293271	0.00209206	17311/14456/15507/18708/14190/232174/20377/12192/83924/19659/14118/21803/17387/17131/14281/14184/17242/12608/12505/12053/16193/16476/12193/80859/65963/18950	26	Yes
TM2_BP_GO:1902229	TM2	BP	GO:1902229	regulation of intrinsic apoptotic signaling pathway in response to DNA damage	8/729	36/17051	0.000112086	0.00124121	0.000885419	12759/20315/22070/20482/68428/12505/22038/17319	8	No
TM2_BP_GO:1902284	TM2	BP	GO:1902284	neuron projection extension involved in neuron projection guidance	7/729	36/17051	0.000715746	0.00576234	0.00411058	20315/20564/20356/22418/20563/18186/22339	7	No
TM2_BP_GO:1902532	TM2	BP	GO:1902532	negative regulation of intracellular signal transduction	41/729	496/17051	4.37e-05	0.000562899	0.000401546	12759/20315/21825/56496/20319/15507/15251/17926/12389/21858/17392/19122/20377/74155/18133/21808/22160/20563/53322/21859/11548/22070/100952/20660/19252/26427/109042/117198/23980/13405/12505/12053/77446/14200/24063/50768/18793/59036/54720/17319/24064	41	Yes
TM2_BP_GO:1902893	TM2	BP	GO:1902893	regulation of pri-miRNA transcription by RNA polymerase II	10/729	55/17051	9.8e-05	0.00113275	0.000808052	15251/11820/21808/20682/20788/21803/14281/16476/12224/13653	10	Yes
TM2_BP_GO:1902895	TM2	BP	GO:1902895	positive regulation of pri-miRNA transcription by RNA polymerase II	8/729	43/17051	0.000412421	0.00370871	0.00264562	15251/21808/20788/21803/14281/16476/12224/13653	8	No
TM2_BP_GO:1902903	TM2	BP	GO:1902903	regulation of supramolecular fiber organization	38/729	367/17051	4.52e-07	1.04e-05	7.44e-06	12759/14219/11568/12955/18708/20742/20356/11820/20292/20971/17926/12389/15530/17756/231637/27360/22003/21809/20563/20194/16835/100952/13717/20312/18186/30794/22411/170643/211401/17318/58804/58859/208177/50768/11465/56431/19241/11853	38	Yes
TM2_BP_GO:1902904	TM2	BP	GO:1902904	negative regulation of supramolecular fiber organization	17/729	165/17051	0.000716662	0.00576234	0.00411058	12759/12955/18708/20742/17926/15530/17756/231637/27360/22003/20563/16835/100952/17318/208177/50768/19241	17	Yes
TM2_BP_GO:1902905	TM2	BP	GO:1902905	positive regulation of supramolecular fiber organization	20/729	195/17051	0.00026869	0.00263063	0.00187657	14219/20356/11820/20292/20971/17926/12389/22003/21809/20194/20312/18186/30794/22411/170643/211401/58804/58859/56431/11853	20	No
TM2_BP_GO:1902947	TM2	BP	GO:1902947	regulation of tau-protein kinase activity	4/729	12/17051	0.00124577	0.00916954	0.00654113	12759/11820/20660/13653	4	No
TM2_BP_GO:1903019	TM2	BP	GO:1903019	negative regulation of glycoprotein metabolic process	6/729	17/17051	4.94e-05	0.000619231	0.000441731	13010/15200/56374/16431/56175/64294	6	No
TM2_BP_GO:1903034	TM2	BP	GO:1903034	regulation of response to wounding	21/729	159/17051	4.28e-06	8.01e-05	5.72e-05	67916/21825/11475/107589/12389/15200/18595/12258/18590/235505/27973/18787/16971/17242/19128/14062/208177/27279/11465/12361/17319	21	Yes
TM2_BP_GO:1903036	TM2	BP	GO:1903036	positive regulation of response to wounding	10/729	68/17051	0.000590807	0.00488499	0.00348472	67916/21825/107589/15200/18787/16971/17242/14062/11465/17319	10	Yes
TM2_BP_GO:1903053	TM2	BP	GO:1903053	regulation of extracellular matrix organization	9/729	46/17051	0.000120681	0.00132749	0.000946971	11568/20356/21808/20682/100952/58859/208177/16193/14089	9	No
TM2_BP_GO:1903055	TM2	BP	GO:1903055	positive regulation of extracellular matrix organization	7/729	24/17051	4.64e-05	0.000589519	0.000420535	20356/21808/20682/100952/58859/208177/16193	7	No
TM2_BP_GO:1903510	TM2	BP	GO:1903510	mucopolysaccharide metabolic process	14/729	62/17051	2.6e-07	6.35e-06	4.53e-06	13179/12111/56773/94214/83921/11600/209378/14042/14043/80982/21803/12505/58250/68169	14	No
TM2_BP_GO:1903522	TM2	BP	GO:1903522	regulation of blood circulation	30/729	234/17051	7.81e-08	2.13e-06	1.52e-06	13616/14219/11931/18708/15251/11820/12389/13052/15200/68813/17390/21808/27360/12671/22003/58861/21833/11548/242202/12288/20312/11539/238130/21834/17131/23980/14062/13405/56188/98660	30	Yes
TM2_BP_GO:1903555	TM2	BP	GO:1903555	regulation of tumor necrosis factor superfamily cytokine production	18/729	166/17051	0.00027122	0.00263063	0.00187657	12759/14456/21825/15507/18708/11820/22418/83397/77125/74155/16803/22160/11600/20312/16193/71586/13057/17319	18	Yes
TM2_BP_GO:1903557	TM2	BP	GO:1903557	positive regulation of tumor necrosis factor superfamily cytokine production	14/729	102/17051	0.000109421	0.00122536	0.000874118	12759/21825/15507/18708/11820/22418/83397/77125/16803/22160/16193/71586/13057/17319	14	Yes
TM2_BP_GO:1903670	TM2	BP	GO:1903670	regulation of sprouting angiogenesis	8/729	36/17051	0.000112086	0.00124121	0.000885419	21825/73230/80837/26427/16598/18746/14645/22339	8	No
TM2_BP_GO:1903706	TM2	BP	GO:1903706	regulation of hemopoiesis	30/729	360/17051	0.000393726	0.00359719	0.00256607	17311/14456/15507/18708/15251/14190/100038882/232174/20377/12192/83924/19659/14118/21803/17387/17131/14281/14184/17242/12608/12505/12053/16193/12010/16476/12193/16449/80859/65963/18950	30	Yes
TM2_BP_GO:1903792	TM2	BP	GO:1903792	negative regulation of anion transport	22/729	238/17051	0.000583269	0.00484689	0.00345755	21825/11815/14758/20377/18133/11600/53322/11421/13121/231070/18769/11539/18605/20788/108073/29810/14783/14062/16410/109731/17470/50790	22	No
TM2_BP_GO:1903793	TM2	BP	GO:1903793	positive regulation of anion transport	37/729	491/17051	0.00062113	0.00511016	0.00364535	78896/14456/20315/14734/12215/18708/15251/11820/12389/19122/21808/68151/11735/21809/53322/67389/20660/80982/16854/11539/21803/16971/29810/18830/12608/16193/69183/68581/14645/56188/14805/12361/13057/17319/22249/50790/20750	37	Yes
TM2_BP_GO:1903844	TM2	BP	GO:1903844	regulation of cellular response to transforming growth factor beta stimulus	20/729	115/17051	8.15e-08	2.21e-06	1.58e-06	56213/21825/268977/12389/68939/235505/17684/21809/100952/65112/14118/21803/66695/20482/17131/68010/24063/58250/24064/53378	20	Yes
TM2_BP_GO:1904018	TM2	BP	GO:1904018	positive regulation of vasculature development	25/729	163/17051	2.78e-08	8.51e-07	6.07e-07	18654/21825/19223/20319/15507/15251/13036/20356/20292/54409/22418/73230/58861/13078/12654/11826/20312/16854/18787/18186/13601/18746/17242/22339/12226	25	Yes
TM2_BP_GO:1904036	TM2	BP	GO:1904036	negative regulation of epithelial cell apoptotic process	9/729	50/17051	0.00023559	0.00233752	0.00166748	14456/20356/54409/11600/56312/18787/17242/18049/68169	9	No
TM2_BP_GO:1904738	TM2	BP	GO:1904738	vascular associated smooth muscle cell migration	8/729	30/17051	2.72e-05	0.000369846	0.000263831	16011/68813/11504/231637/238130/16971/14783/18552	8	No
TM2_BP_GO:1904752	TM2	BP	GO:1904752	regulation of vascular associated smooth muscle cell migration	7/729	29/17051	0.000173607	0.00179057	0.00127731	16011/68813/11504/231637/238130/16971/18552	7	No
TM2_BP_GO:1904754	TM2	BP	GO:1904754	positive regulation of vascular associated smooth muscle cell migration	7/729	19/17051	8.15e-06	0.000136992	9.77e-05	16011/68813/11504/231637/238130/16971/18552	7	No
TM2_BP_GO:1904888	TM2	BP	GO:1904888	cranial skeletal system development	13/729	67/17051	4.3e-06	8.01e-05	5.72e-05	18933/18595/21808/22160/20204/21809/14042/231070/14451/17387/71175/58250/98711	13	No
TM2_BP_GO:1905314	TM2	BP	GO:1905314	semi-lunar valve development	9/729	32/17051	5.25e-06	9.41e-05	6.71e-05	20564/268902/21808/22160/20563/20682/100952/21803/16449	9	No
TM2_BP_GO:1905330	TM2	BP	GO:1905330	regulation of morphogenesis of an epithelium	13/729	66/17051	3.6e-06	6.87e-05	4.9e-05	15945/22418/20377/18595/18590/57764/20682/18121/94275/14573/21803/17242/22339	13	Yes
TM2_BP_GO:1905332	TM2	BP	GO:1905332	positive regulation of morphogenesis of an epithelium	8/729	37/17051	0.000137702	0.00147228	0.00105025	18595/20682/18121/94275/14573/21803/17242/22339	8	No
TM2_BP_GO:1905517	TM2	BP	GO:1905517	macrophage migration	9/729	58/17051	0.000738527	0.00591895	0.0042223	21825/71660/100952/20312/16854/17387/17242/17319/17470	9	Yes
TM2_BP_GO:1905521	TM2	BP	GO:1905521	regulation of macrophage migration	8/729	43/17051	0.000412421	0.00370871	0.00264562	21825/71660/100952/20312/17387/17242/17319/17470	8	Yes
TM2_BP_GO:1905906	TM2	BP	GO:1905906	regulation of amyloid fibril formation	5/729	14/17051	0.000204347	0.0020605	0.00146987	12759/12955/11820/15530/16835	5	Yes
TM2_BP_GO:1905907	TM2	BP	GO:1905907	negative regulation of amyloid fibril formation	4/729	11/17051	0.000859458	0.00666215	0.00475247	12759/12955/15530/16835	4	Yes
TM2_BP_GO:1990000	TM2	BP	GO:1990000	amyloid fibril formation	6/729	24/17051	0.000415651	0.00370871	0.00264562	12759/12955/11820/15530/16835/12010	6	Yes
TM2_BP_GO:1990266	TM2	BP	GO:1990266	neutrophil migration	17/729	116/17051	8.59e-06	0.000143058	0.000102051	13616/12215/20292/13052/15945/19035/14825/16803/20563/21828/13479/20312/16854/13617/17242/227541/20750	17	Yes
TM2_BP_GO:1990868	TM2	BP	GO:1990868	response to chemokine	10/729	66/17051	0.000462884	0.00402166	0.00286887	20315/20564/15251/20292/15945/14825/20563/20312/19252/17300	10	Yes
TM2_BP_GO:1990869	TM2	BP	GO:1990869	cellular response to chemokine	10/729	66/17051	0.000462884	0.00402166	0.00286887	20315/20564/15251/20292/15945/14825/20563/20312/19252/17300	10	Yes
TM2_BP_GO:2000027	TM2	BP	GO:2000027	regulation of animal organ morphogenesis	21/729	123/17051	5.4e-08	1.54e-06	1.1e-06	14734/20319/22418/20377/268902/18590/17684/57764/20682/69217/18121/94275/14362/13617/14573/22411/21803/24063/239405/22339/59036	21	Yes
TM2_BP_GO:2000050	TM2	BP	GO:2000050	regulation of non-canonical Wnt signaling pathway	8/729	25/17051	6.08e-06	0.000105836	7.55e-05	14734/20319/22418/20377/69217/76441/672511/59036	8	Yes
TM2_BP_GO:2000095	TM2	BP	GO:2000095	regulation of Wnt signaling pathway, planar cell polarity pathway	5/729	15/17051	0.000295772	0.00279491	0.00199376	14734/20319/20377/69217/59036	5	No
TM2_BP_GO:2000117	TM2	BP	GO:2000117	negative regulation of cysteine-type endopeptidase activity	11/729	80/17051	0.000575402	0.00478954	0.00341664	14456/21825/20319/12955/13479/11826/12505/16193/18793/22339/15370	11	No
TM2_BP_GO:2000146	TM2	BP	GO:2000146	negative regulation of cell motility	39/729	283/17051	1.01e-10	6.52e-09	4.65e-09	16011/114886/20317/13179/20315/21825/13134/20319/11815/20377/11819/77125/18133/17684/22003/20563/13078/13479/18121/22240/100952/20312/11932/12798/11539/18787/19252/22411/21803/16971/20733/208177/50768/12825/16449/17965/17319/17470/29876	39	Yes
TM2_BP_GO:2000181	TM2	BP	GO:2000181	negative regulation of blood vessel morphogenesis	21/729	108/17051	4.92e-09	1.89e-07	1.35e-07	20317/13179/20692/21825/23876/64103/21826/15945/11504/21808/12509/100952/18787/12828/26427/27494/16598/12827/21413/24064/17300	21	Yes
TM2_BP_GO:2000401	TM2	BP	GO:2000401	regulation of lymphocyte migration	9/729	60/17051	0.000950295	0.00730917	0.00521402	20315/11815/11820/57266/15945/22418/67374/13601/17470	9	No
TM2_BP_GO:2001233	TM2	BP	GO:2001233	regulation of apoptotic signaling pathway	40/729	381/17051	1.56e-07	4.11e-06	2.93e-06	12759/20315/21825/20319/15507/15251/13036/12389/51795/20377/21808/21859/22070/56312/18121/12167/94275/14827/20312/16854/18787/18186/67025/14573/14451/26427/117198/20482/15937/80707/64294/68428/12505/16905/16410/27279/18793/22339/22038/17319	40	Yes
TM2_BP_GO:2001234	TM2	BP	GO:2001234	negative regulation of apoptotic signaling pathway	22/729	228/17051	0.000323344	0.00301524	0.00215093	12759/20315/20319/15507/15251/22070/18121/20312/16854/18787/18186/14573/14451/26427/117198/15937/12505/16905/16410/18793/22339/17319	22	Yes
TM2_BP_GO:2001235	TM2	BP	GO:2001235	positive regulation of apoptotic signaling pathway	19/729	152/17051	2.67e-05	0.000367447	0.00026212	12759/21825/13036/12389/51795/20377/21808/21859/56312/12167/94275/14827/67025/20482/80707/64294/68428/27279/22038	19	Yes
TM2_BP_GO:2001236	TM2	BP	GO:2001236	regulation of extrinsic apoptotic signaling pathway	22/729	159/17051	1.15e-06	2.42e-05	1.73e-05	21825/20319/12389/51795/20377/21808/21859/12167/14827/20312/16854/18787/18186/14573/14451/20482/80707/64294/16905/16410/27279/22339	22	Yes
TM2_BP_GO:2001238	TM2	BP	GO:2001238	positive regulation of extrinsic apoptotic signaling pathway	12/729	58/17051	4.97e-06	9.03e-05	6.44e-05	21825/12389/51795/20377/21808/21859/12167/14827/20482/80707/64294/27279	12	Yes
TM2_CC_GO:0001527	TM2	CC	GO:0001527	microfibril	8/735	13/17193	1.14e-08	6.54e-07	4.99e-07	268977/108075/207596/50530/17150/76293/14118/58859	8	Yes
TM2_CC_GO:0001725	TM2	CC	GO:0001725	stress fiber	17/735	80/17193	3.59e-08	1.27e-06	9.66e-07	11475/107589/109711/98932/13800/226251/26563/72333/12798/60595/30794/208431/17886/27494/29810/50768/13057	17	Yes
TM2_CC_GO:0005581	TM2	CC	GO:0005581	collagen trimer	24/735	75/17193	3.15e-15	2.88e-13	2.2e-13	329941/12816/13179/12843/107581/12842/140792/12835/12829/17022/12834/12833/100952/12837/71355/12828/109323/12831/12827/12819/69183/237759/12825/12814	24	Yes
TM2_CC_GO:0005583	TM2	CC	GO:0005583	fibrillar collagen trimer	7/735	11/17193	7.2e-08	2.2e-06	1.68e-06	12843/107581/12842/17022/12831/12825/12814	7	Yes
TM2_CC_GO:0005604	TM2	CC	GO:0005604	basement membrane	38/735	114/17193	4.44e-24	5.09e-22	3.88e-22	329941/20317/14268/20692/13640/216616/18208/13010/21826/21858/16949/15530/12829/11504/23928/12496/21808/54156/21828/57764/80883/21859/16777/12837/242022/16773/14118/16785/12828/231470/12831/12827/58859/12819/18073/22339/12361/226519	38	Yes
TM2_CC_GO:0005790	TM2	CC	GO:0005790	smooth endoplasmic reticulum	10/735	36/17193	1.77e-06	4.06e-05	3.1e-05	53381/17756/19035/319984/20192/104001/14827/338367/12304/71853	10	No
TM2_CC_GO:0005793	TM2	CC	GO:0005793	endoplasmic reticulum-Golgi intermediate compartment	11/735	71/17193	0.000199043	0.00260462	0.00198743	14268/67916/66111/53322/18220/67511/56334/71853/68581/12406/16790	11	No
TM2_CC_GO:0005796	TM2	CC	GO:0005796	Golgi lumen	8/735	21/17193	1.33e-06	3.39e-05	2.59e-05	14734/20657/14733/14735/20971/15530/20318/15529	8	Yes
TM2_CC_GO:0005901	TM2	CC	GO:0005901	caveola	16/735	97/17193	3.3e-06	7.19e-05	5.49e-05	19223/11931/12389/19012/16531/11826/16835/20525/12288/226101/109042/19285/14062/56188/50768/98660	16	Yes
TM2_CC_GO:0005911	TM2	CC	GO:0005911	cell-cell junction	45/735	490/17193	1.2e-06	3.25e-05	2.48e-05	58187/13640/23964/11931/18708/11820/12558/107589/13052/14107/14924/109711/56332/18133/12552/17967/27360/11735/68070/226751/11548/20525/67374/60595/71602/319387/30794/208431/269608/170643/211401/17886/27494/17131/77446/396184/56188/70549/22339/16449/11465/98660/211712/12361/29876	45	Yes
TM2_CC_GO:0005925	TM2	CC	GO:0005925	focal adhesion	18/735	166/17193	0.00027109	0.00295617	0.00225569	223272/20971/12389/109711/319939/13800/72333/18186/208431/17886/16419/208177/396184/16410/50768/70549/13057/244895	18	Yes
TM2_CC_GO:0009897	TM2	CC	GO:0009897	external side of plasma membrane	34/735	417/17193	0.000249366	0.0027856	0.00212554	20315/21825/13640/11658/12628/16157/110454/14735/13038/15945/18595/17967/12509/11421/14658/17304/16531/16835/105727/12931/16854/11932/16971/27494/230857/12505/77446/16193/12010/16410/16880/14972/12804/16790	34	Yes
TM2_CC_GO:0009925	TM2	CC	GO:0009925	basal plasma membrane	25/735	255/17193	0.00010107	0.00144656	0.00110379	67916/11931/12558/12389/13052/72293/12671/11735/21366/11421/11826/16835/20525/105727/208890/11539/242274/208431/16971/338367/12505/15446/54403/193740/12361	25	No
TM2_CC_GO:0014704	TM2	CC	GO:0014704	intercalated disc	10/735	63/17193	0.000314474	0.00320065	0.00244223	11931/12558/13052/109711/11735/11548/20525/56188/70549/98660	10	Yes
TM2_CC_GO:0015629	TM2	CC	GO:0015629	actin cytoskeleton	41/735	479/17193	1.96e-05	0.000345522	0.000263648	98267/11475/12955/20742/12558/22403/107589/109711/17756/98932/22004/13800/22003/226751/102866/22240/20525/109624/226251/26563/72333/12798/242274/60595/71602/13196/30794/208431/211401/17886/27494/338367/29810/13822/14457/50768/11465/56431/13057/244895/24064	41	Yes
TM2_CC_GO:0016323	TM2	CC	GO:0016323	basolateral plasma membrane	22/735	222/17193	0.000221948	0.00260647	0.00198885	67916/11931/12558/12389/13052/72293/11735/21366/11826/16835/20525/105727/208890/11539/242274/16971/338367/12505/15446/54403/193740/12361	22	No
TM2_CC_GO:0030016	TM2	CC	GO:0030016	myofibril	21/735	208/17193	0.000237027	0.00271396	0.00207087	15507/12955/20742/20971/109711/98932/17390/20192/22004/13008/11735/22003/20525/12288/72333/60595/30794/29810/13405/14200/11465	21	Yes
TM2_CC_GO:0030017	TM2	CC	GO:0030017	sarcomere	19/735	187/17193	0.000426168	0.00415287	0.00316882	15507/12955/20742/109711/98932/17390/20192/22004/13008/11735/22003/20525/12288/72333/60595/30794/29810/13405/14200	19	Yes
TM2_CC_GO:0030018	TM2	CC	GO:0030018	Z disc	15/735	125/17193	0.0002891	0.00300927	0.0022962	15507/12955/109711/98932/20192/13008/11735/20525/12288/72333/60595/30794/29810/13405/14200	15	Yes
TM2_CC_GO:0030027	TM2	CC	GO:0030027	lamellipodium	19/735	170/17193	0.000124293	0.0016743	0.00127756	17311/11820/12558/107589/14107/19249/13800/226751/22240/226251/72333/30794/269608/27494/74055/12505/22253/16410/14089	19	Yes
TM2_CC_GO:0030055	TM2	CC	GO:0030055	cell-substrate junction	19/735	177/17193	0.000211282	0.00260647	0.00198885	223272/20971/12389/109711/319939/13800/72333/18186/208431/17886/16419/13405/208177/396184/16410/50768/70549/13057/244895	19	Yes
TM2_CC_GO:0030141	TM2	CC	GO:0030141	secretory granule	30/735	336/17193	0.000119433	0.00165759	0.00126481	78896/18619/20692/21825/12842/12215/21826/13036/12389/16949/13052/109711/21808/21809/15211/11826/14827/18787/69048/21803/16971/20482/15212/230857/56175/56334/12876/18552/68581/22339	30	No
TM2_CC_GO:0030312	TM2	CC	GO:0030312	external encapsulating structure	129/735	474/17193	1.26e-68	2.89e-66	2.2e-66	14264/329941/20317/12816/56213/14268/13179/12843/20692/18295/11647/68792/16007/21825/23876/13640/14219/14734/64817/20200/12111/107581/216616/12842/17183/18208/140792/20657/116847/12835/14733/50706/13010/21826/27047/14190/268977/16012/14735/17926/71660/22403/21858/16949/269959/17392/15530/22418/20377/108075/73230/12829/11504/242939/23928/16997/12496/17390/18133/12258/18845/21808/54156/242384/94214…	129	Yes
TM2_CC_GO:0031012	TM2	CC	GO:0031012	extracellular matrix	129/735	473/17193	9.51e-69	2.89e-66	2.2e-66	14264/329941/20317/12816/56213/14268/13179/12843/20692/18295/11647/68792/16007/21825/23876/13640/14219/14734/64817/20200/12111/107581/216616/12842/17183/18208/140792/20657/116847/12835/14733/50706/13010/21826/27047/14190/268977/16012/14735/17926/71660/22403/21858/16949/269959/17392/15530/22418/20377/108075/73230/12829/11504/242939/23928/16997/12496/17390/18133/12258/18845/21808/54156/242384/94214…	129	Yes
TM2_CC_GO:0031252	TM2	CC	GO:0031252	cell leading edge	36/735	390/17193	1.26e-05	0.000230241	0.000175684	17311/20200/20742/11820/12558/107589/14107/109711/17756/268902/19249/231637/13800/68151/226751/22240/226251/72333/11539/30794/269608/17886/16419/27494/338367/74055/12505/208177/14457/22253/16410/27279/50768/70549/14089/16911	36	Yes
TM2_CC_GO:0031594	TM2	CC	GO:0031594	neuromuscular junction	15/735	95/17193	1.15e-05	0.000219839	0.000167746	50706/11820/13052/18040/11735/18039/21828/102866/16773/208898/17886/14062/226519/22249/22142	15	Yes
TM2_CC_GO:0031674	TM2	CC	GO:0031674	I band	15/735	137/17193	0.000772169	0.00707307	0.00539706	15507/12955/109711/98932/20192/13008/11735/20525/12288/72333/60595/30794/29810/13405/14200	15	Yes
TM2_CC_GO:0032432	TM2	CC	GO:0032432	actin filament bundle	19/735	89/17193	5.23e-09	3.42e-07	2.61e-07	11475/12955/107589/109711/98932/13800/102866/226251/26563/72333/12798/60595/30794/208431/17886/27494/29810/50768/13057	19	Yes
TM2_CC_GO:0042383	TM2	CC	GO:0042383	sarcolemma	21/735	163/17193	6.36e-06	0.000132447	0.000101063	12111/12215/11931/12835/12558/12389/20192/24052/11735/21809/12834/11548/11826/12833/20525/12288/16773/13617/13405/56188/98660	21	Yes
TM2_CC_GO:0042641	TM2	CC	GO:0042641	actomyosin	18/735	89/17193	3.24e-08	1.27e-06	9.66e-07	11475/107589/109711/98932/13800/226751/226251/26563/72333/12798/60595/30794/208431/17886/27494/29810/50768/13057	18	Yes
TM2_CC_GO:0042734	TM2	CC	GO:0042734	presynaptic membrane	21/735	189/17193	6.08e-05	0.000928361	0.000708379	14735/12558/19266/17967/12671/14823/80883/52882/16531/12288/215114/239217/116837/11539/208898/108073/59095/219228/14805/12361/22249	21	No
TM2_CC_GO:0043209	TM2	CC	GO:0043209	myelin sheath	21/735	207/17193	0.000221787	0.00260647	0.00198885	12955/11931/17926/20965/18040/17967/18039/21881/14827/11739/338367/23980/17449/18746/18477/14645/11465/98660/17319/22186/22142	21	No
TM2_CC_GO:0043292	TM2	CC	GO:0043292	contractile fiber	23/735	221/17193	7.69e-05	0.00113629	0.000867041	11475/15507/12955/13010/20742/20971/109711/98932/17390/20192/22004/13008/11735/22003/20525/12288/72333/60595/30794/29810/13405/14200/11465	23	Yes
TM2_CC_GO:0044291	TM2	CC	GO:0044291	cell-cell contact zone	12/735	86/17193	0.000285294	0.00300927	0.0022962	11931/12558/13052/109711/11735/11548/20525/67374/56188/70549/98660/211712	12	Yes
TM2_CC_GO:0044306	TM2	CC	GO:0044306	neuron projection terminus	20/735	204/17193	0.000484315	0.00462118	0.00352616	18619/19122/12671/16531/11826/16526/21983/26563/11539/208898/108073/19142/23980/13405/18049/396184/14645/14805/11465/22249	20	No
TM2_CC_GO:0044853	TM2	CC	GO:0044853	plasma membrane raft	18/735	126/17193	6.79e-06	0.000135129	0.000103109	19223/11931/12558/12389/19012/16531/11826/16835/20525/12288/226101/109042/338367/19285/14062/56188/50768/98660	18	Yes
TM2_CC_GO:0045121	TM2	CC	GO:0045121	membrane raft	41/735	369/17193	2.24e-08	1.11e-06	8.45e-07	67916/19223/12215/11931/14733/11820/20971/12558/12389/13052/19122/14758/19012/11600/13176/20194/16531/11826/16835/20525/12288/226101/13617/11739/170643/109042/338367/22146/19285/12876/14062/13405/12406/56188/50768/193740/98660/12361/22038/53378/22142	41	Yes
TM2_CC_GO:0045177	TM2	CC	GO:0045177	apical part of cell	41/735	434/17193	1.77e-06	4.06e-05	3.1e-05	16008/78896/14268/66141/11931/11820/12558/12389/14107/56332/21366/68070/13479/16531/11826/16526/67968/16835/20525/14827/22295/105727/11932/69048/208431/16971/23980/110350/12505/329628/56188/14089/193740/16449/11465/54670/13057/12804/56615/20750/29876	41	Yes
TM2_CC_GO:0045178	TM2	CC	GO:0045178	basal part of cell	27/735	275/17193	5.28e-05	0.00083332	0.000635859	67916/11931/12558/12389/13052/72293/12671/11735/21366/11421/11826/16835/20525/105727/208890/11539/242274/208431/16971/338367/12505/208177/15446/14089/54403/193740/12361	27	No
TM2_CC_GO:0062023	TM2	CC	GO:0062023	collagen-containing extracellular matrix	111/735	358/17193	2.11e-65	3.22e-63	2.46e-63	14264/329941/20317/12816/56213/14268/13179/12843/20692/18295/68792/16007/21825/23876/13640/14734/20200/12111/107581/216616/12842/17183/18208/140792/20657/116847/12835/14733/50706/13010/21826/27047/14190/268977/16012/14735/17926/71660/21858/16949/15530/20377/108075/73230/12829/11504/23928/16997/12496/18133/12258/18845/21808/54156/94214/21809/20563/11600/17022/50530/230971/21828/20194/57764/80883/2…	111	Yes
TM2_CC_GO:0097060	TM2	CC	GO:0097060	synaptic membrane	38/735	448/17193	4.78e-05	0.000781849	0.000596584	64085/68792/15507/12955/23964/14735/12558/19266/17967/12671/269994/11735/13176/21366/14823/80883/14658/52882/16531/12288/215114/239217/116837/11539/242274/18186/30794/208898/108073/16419/12876/59095/14062/13405/219228/14805/12361/22249	38	No
TM2_CC_GO:0097517	TM2	CC	GO:0097517	contractile actin filament bundle	17/735	80/17193	3.59e-08	1.27e-06	9.66e-07	11475/107589/109711/98932/13800/226251/26563/72333/12798/60595/30794/208431/17886/27494/29810/50768/13057	17	Yes
TM2_CC_GO:0098643	TM2	CC	GO:0098643	banded collagen fibril	7/735	11/17193	7.2e-08	2.2e-06	1.68e-06	12843/107581/12842/17022/12831/12825/12814	7	Yes
TM2_CC_GO:0098644	TM2	CC	GO:0098644	complex of collagen trimers	10/735	17/17193	2.84e-10	2.17e-08	1.66e-08	12843/107581/12842/12829/17022/12828/12831/12827/12825/12814	10	Yes
TM2_CC_GO:0098857	TM2	CC	GO:0098857	membrane microdomain	41/735	370/17193	2.42e-08	1.11e-06	8.45e-07	67916/19223/12215/11931/14733/11820/20971/12558/12389/13052/19122/14758/19012/11600/13176/20194/16531/11826/16835/20525/12288/226101/13617/11739/170643/109042/338367/22146/19285/12876/14062/13405/12406/56188/50768/193740/98660/12361/22038/53378/22142	41	Yes
TM2_CC_GO:0098858	TM2	CC	GO:0098858	actin-based cell projection	26/735	209/17193	1.02e-06	2.93e-05	2.24e-05	17311/11820/13052/14107/17756/18595/18590/13800/11600/21366/102866/22295/72333/242274/71602/238130/21803/338367/80707/13405/12505/22253/16410/54670/29876/11853	26	No
TM2_CC_GO:0098889	TM2	CC	GO:0098889	intrinsic component of presynaptic membrane	15/735	122/17193	0.000221003	0.00260647	0.00198885	14735/12558/19266/17967/12671/14823/80883/52882/16531/12288/11539/108073/59095/219228/14805	15	No
TM2_CC_GO:0099240	TM2	CC	GO:0099240	intrinsic component of synaptic membrane	22/735	231/17193	0.000387576	0.00385891	0.00294451	64085/14735/12558/19266/17967/12671/269994/13176/21366/14823/80883/52882/16531/12288/11539/242274/18186/108073/16419/59095/219228/14805	22	No
TM2_CC_GO:0099569	TM2	CC	GO:0099569	presynaptic cytoskeleton	4/735	10/17193	0.000565843	0.0052889	0.00403566	18040/18039/116837/11465	4	No
TM2_CC_GO:0150034	TM2	CC	GO:0150034	distal axon	34/735	371/17193	2.53e-05	0.000429029	0.000327368	12759/18619/11820/21858/13052/19122/17756/66849/17967/231637/12671/18039/13176/16531/11826/16526/21983/22240/26563/72333/11539/18186/208898/108073/16971/19142/23980/22253/14645/14805/11465/211712/22249/243931	34	No
TM2_MF_GO:0001540	TM2	MF	GO:0001540	amyloid-beta binding	10/717	62/16912	0.000257057	0.00459115	0.00398957	12759/12955/13010/19122/21808/16835/11787/20660/16431/64294	10	No
TM2_MF_GO:0001664	TM2	MF	GO:0001664	G protein-coupled receptor binding	25/717	276/16912	0.000304781	0.00511425	0.00444413	13616/18619/20315/170458/11820/57266/20292/17926/19122/15945/22418/20377/14825/68151/11421/14362/20312/11539/22411/105171/67775/68010/193740/66102/53378	25	Yes
TM2_MF_GO:0001968	TM2	MF	GO:0001968	fibronectin binding	13/717	32/16912	2.12e-10	1.08e-08	9.41e-09	16011/21825/14219/16012/20971/17926/13038/17390/21828/17150/12845/16410/22339	13	Yes
TM2_MF_GO:0002020	TM2	MF	GO:0002020	protease binding	20/717	138/16912	1.48e-06	4.94e-05	4.29e-05	14268/12843/12842/13010/21858/232345/19122/15530/21859/16835/12845/18787/16971/13601/16410/13014/12825/14089/193740/17319	20	Yes
TM2_MF_GO:0003779	TM2	MF	GO:0003779	actin binding	35/717	424/16912	0.000136175	0.0026816	0.00233023	21345/20742/107589/109711/17756/20198/22004/231637/13800/27360/22003/11421/16531/102866/109624/215114/226251/15191/72333/12798/60595/71602/76441/30794/208431/211401/17886/338367/13405/13822/14457/70549/56431/19241/218194	35	Yes
TM2_MF_GO:0004180	TM2	MF	GO:0004180	carboxypeptidase activity	8/717	38/16912	0.00015848	0.00296861	0.00257963	55987/11568/242939/56264/11421/74617/19025/12876	8	No
TM2_MF_GO:0004857	TM2	MF	GO:0004857	enzyme inhibitor activity	29/717	332/16912	0.000194474	0.0035561	0.00309014	20317/14456/14734/15507/13010/11820/74116/21858/232345/19122/12258/66849/235505/20563/13479/209378/21859/18769/18787/67025/50766/320365/23980/71853/20733/18049/12406/13014/218194	29	Yes
TM2_MF_GO:0004866	TM2	MF	GO:0004866	endopeptidase inhibitor activity	19/717	155/16912	3.14e-05	0.000777284	0.000675436	20317/14456/13010/11820/21858/232345/19122/12258/235505/13479/209378/21859/18787/50766/23980/20733/18049/12406/13014	19	No
TM2_MF_GO:0005109	TM2	MF	GO:0005109	frizzled binding	8/717	38/16912	0.00015848	0.00296861	0.00257963	11820/17926/22418/20377/14362/22411/68010/53378	8	No
TM2_MF_GO:0005125	TM2	MF	GO:0005125	cytokine activity	21/717	184/16912	3.62e-05	0.000869531	0.000755596	17311/20315/57266/20292/15945/22418/77125/110075/14825/21808/21809/20312/12931/22411/21803/16193/14560/22339/17319/66102/20750	21	Yes
TM2_MF_GO:0005126	TM2	MF	GO:0005126	cytokine receptor binding	29/717	250/16912	9.04e-07	3.15e-05	2.74e-05	17311/18654/20315/13640/18708/57266/20292/15945/77125/68939/14825/21808/21809/11600/53322/20312/12931/14573/21803/13601/17131/12505/18049/16193/16880/22339/17319/66102/53378	29	Yes
TM2_MF_GO:0005160	TM2	MF	GO:0005160	transforming growth factor beta receptor binding	7/717	26/16912	7.76e-05	0.00161059	0.00139955	68939/21808/21809/14573/21803/17131/12505	7	No
TM2_MF_GO:0005161	TM2	MF	GO:0005161	platelet-derived growth factor receptor binding	6/717	14/16912	1.28e-05	0.000391721	0.000340394	18708/18595/18590/71785/54635/22339	6	Yes
TM2_MF_GO:0005178	TM2	MF	GO:0005178	integrin binding	34/717	133/16912	1.01e-17	1.55e-15	1.35e-15	14268/223272/20315/67916/16007/21825/23876/14219/107581/11820/100038882/22403/21858/13052/13612/109711/18133/21828/17304/67374/16777/100952/20312/12845/14118/12828/17387/17886/16419/16410/12825/70549/14089/20750	34	Yes
TM2_MF_GO:0005200	TM2	MF	GO:0005200	structural constituent of cytoskeleton	11/717	61/16912	4.44e-05	0.0010026	0.000871227	20742/22004/27360/11735/22003/18039/102866/22146/70549/11465/22142	11	Yes
TM2_MF_GO:0005201	TM2	MF	GO:0005201	extracellular matrix structural constituent	59/717	140/16912	6.83e-44	5.25e-41	4.56e-41	329941/12816/14268/13179/12843/20692/18295/68792/21825/23876/12111/107581/216616/12842/17183/18208/116847/12835/50706/268977/16012/15530/108075/73230/12829/16997/94214/20563/17022/50530/21828/12834/17304/12833/17150/16777/76293/100952/13717/12837/71355/16773/12845/14118/12828/66695/13601/231470/81877/12831/12827/58859/320712/12819/18073/237759/12825/226519/12814	59	Yes
TM2_MF_GO:0005506	TM2	MF	GO:0005506	iron ion binding	15/717	128/16912	0.000342734	0.00548375	0.00476521	114886/19223/14325/14319/232174/13107/14789/13078/12583/13121/18452/13082/12642/18451/66234	15	No
TM2_MF_GO:0005516	TM2	MF	GO:0005516	calmodulin binding	19/717	184/16912	0.000312982	0.00511425	0.00444413	11568/18708/20742/107589/83397/17756/20192/27360/18573/12288/12798/71602/208898/108073/17886/338367/227541/12361/22249	19	No
TM2_MF_GO:0005518	TM2	MF	GO:0005518	collagen binding	21/717	70/16912	6.07e-13	3.89e-11	3.38e-11	13179/20692/18542/21825/11568/14733/13038/18590/56693/17022/21828/12834/407800/12833/12845/66695/17131/81877/320712/12406/18073	21	Yes
TM2_MF_GO:0005520	TM2	MF	GO:0005520	insulin-like growth factor binding	11/717	28/16912	8.18e-09	3.69e-07	3.21e-07	16008/16011/56213/16010/16007/14219/16012/22403/18133/50766/16410	11	Yes
TM2_MF_GO:0005539	TM2	MF	GO:0005539	glycosaminoglycan binding	48/717	200/16912	3.18e-23	1.22e-20	1.06e-20	14268/13179/18542/16007/21825/14219/12628/12111/116847/20564/50706/21826/20356/11820/22403/15200/19122/15945/20377/11504/16997/11804/18133/17967/94214/20563/21828/78892/407800/22240/15191/80982/12845/18186/14118/81877/12831/58859/17242/12505/320712/70370/237759/239405/22339/21930/68169/12814	48	Yes
TM2_MF_GO:0008083	TM2	MF	GO:0008083	growth factor activity	28/717	130/16912	8.04e-13	4.75e-11	4.13e-11	17311/18654/18295/20315/14219/20256/216616/22403/15200/110075/14825/18133/21808/18590/21809/21828/71785/12587/15191/54635/14573/21803/66208/17242/18049/16193/14560/22339	28	Yes
TM2_MF_GO:0008201	TM2	MF	GO:0008201	heparin binding	39/717	150/16912	1.99e-20	5.09e-18	4.43e-18	14268/18542/16007/21825/14219/12628/116847/20564/50706/21826/11820/22403/15200/15945/20377/11504/16997/11804/18133/17967/20563/21828/78892/407800/15191/12845/18186/14118/81877/12831/58859/17242/320712/70370/237759/239405/22339/68169/12814	39	Yes
TM2_MF_GO:0008238	TM2	MF	GO:0008238	exopeptidase activity	13/717	87/16912	7.25e-05	0.00154625	0.00134364	55987/11568/13036/242939/56264/13479/11421/74617/19025/17387/12876/14089/16790	13	No
TM2_MF_GO:0015929	TM2	MF	GO:0015929	hexosaminidase activity	5/717	15/16912	0.000284401	0.00496409	0.00431364	83921/15211/80982/15212/14667	5	No
TM2_MF_GO:0019838	TM2	MF	GO:0019838	growth factor binding	36/717	142/16912	1.47e-18	2.82e-16	2.45e-16	16008/16011/56213/16010/12843/68792/16007/21825/14219/16157/12842/14733/268977/16012/22403/232345/108075/18595/16997/18133/18590/72293/235505/21809/12833/16998/18186/19252/50766/12831/14184/16410/16880/12825/22339/53378	36	Yes
TM2_MF_GO:0019955	TM2	MF	GO:0019955	cytokine binding	18/717	134/16912	1.44e-05	0.000426485	0.000370603	21825/16157/268977/232345/108075/235505/21809/18121/12167/16998/12931/12845/66042/12505/16410/16880/17965/12804	18	Yes
TM2_MF_GO:0030020	TM2	MF	GO:0030020	extracellular matrix structural constituent conferring tensile strength	17/717	38/16912	4.79e-14	3.64e-12	3.17e-12	12816/12843/107581/12842/12835/12829/12834/12833/12837/71355/12828/12831/12827/12819/237759/12825/12814	17	Yes
TM2_MF_GO:0030021	TM2	MF	GO:0030021	extracellular matrix structural constituent conferring compression resistance	8/717	12/16912	4.28e-09	2.05e-07	1.78e-07	13179/18295/12111/116847/15530/94214/17022/66695	8	No
TM2_MF_GO:0030169	TM2	MF	GO:0030169	low-density lipoprotein particle binding	5/717	17/16912	0.000546055	0.00855858	0.00743714	21825/140792/16835/20660/18830	5	No
TM2_MF_GO:0030414	TM2	MF	GO:0030414	peptidase inhibitor activity	21/717	160/16912	4.15e-06	0.000132825	0.000115421	20317/14456/14734/13010/11820/74116/21858/232345/19122/12258/235505/13479/209378/21859/18787/50766/23980/20733/18049/12406/13014	21	Yes
TM2_MF_GO:0030545	TM2	MF	GO:0030545	receptor regulator activity	58/717	439/16912	1.09e-14	1.04e-12	9.07e-13	17311/13616/78896/14456/18654/18619/18295/20315/13640/14219/20319/20256/216616/170458/110454/20356/11820/57266/20292/22403/15200/15945/14313/22418/77125/110075/14825/18133/21808/18590/56811/21809/20563/21828/71785/12587/67389/20312/15191/54635/12931/16854/14573/22411/14118/21803/66208/17242/18049/16193/14560/22339/16449/17965/17319/110074/66102/20750	58	Yes
TM2_MF_GO:0030546	TM2	MF	GO:0030546	signaling receptor activator activity	54/717	403/16912	5.22e-14	3.64e-12	3.17e-12	17311/13616/78896/14456/18654/18619/18295/20315/13640/14219/20319/20256/216616/170458/20356/11820/57266/20292/22403/15200/15945/22418/77125/110075/14825/18133/21808/18590/21809/20563/21828/71785/12587/67389/20312/15191/54635/12931/16854/14573/22411/14118/21803/66208/17242/18049/16193/14560/22339/16449/17965/17319/66102/20750	54	Yes
TM2_MF_GO:0031994	TM2	MF	GO:0031994	insulin-like growth factor I binding	5/717	13/16912	0.000130831	0.00264416	0.0022977	16008/16011/16010/16012/16410	5	No
TM2_MF_GO:0042056	TM2	MF	GO:0042056	chemoattractant activity	8/717	29/16912	1.95e-05	0.000534862	0.000464779	18654/11820/15945/22418/20312/16854/22339/17319	8	No
TM2_MF_GO:0043236	TM2	MF	GO:0043236	laminin binding	10/717	30/16912	2.45e-07	9.4e-06	8.17e-06	21825/14733/215798/20563/21828/57764/16854/16785/13601/18073	10	Yes
TM2_MF_GO:0043394	TM2	MF	GO:0043394	proteoglycan binding	12/717	38/16912	3.02e-08	1.29e-06	1.12e-06	14268/12628/20356/11820/13038/14313/20563/12845/12831/70370/18073/53378	12	Yes
TM2_MF_GO:0043395	TM2	MF	GO:0043395	heparan sulfate proteoglycan binding	7/717	21/16912	1.65e-05	0.000469636	0.000408099	12628/20356/11820/14313/20563/12845/70370	7	Yes
TM2_MF_GO:0046332	TM2	MF	GO:0046332	SMAD binding	13/717	83/16912	4.38e-05	0.0010026	0.000871227	12843/17684/24136/12167/65112/22057/26427/12006/20482/17131/14281/16476/12825	13	No
TM2_MF_GO:0046982	TM2	MF	GO:0046982	protein heterodimerization activity	26/717	260/16912	4.61e-05	0.00101186	0.000879273	23964/11931/18708/15251/170458/11820/27386/12389/18590/22004/22003/15211/14042/11548/21419/215114/14043/14362/11932/11539/12608/21413/98660/13057/15370/53378	26	Yes
TM2_MF_GO:0048018	TM2	MF	GO:0048018	receptor ligand activity	54/717	398/16912	3.09e-14	2.64e-12	2.29e-12	17311/13616/78896/14456/18654/18619/18295/20315/13640/14219/20319/20256/216616/170458/20356/11820/57266/20292/22403/15200/15945/22418/77125/110075/14825/18133/21808/18590/21809/20563/21828/71785/12587/67389/20312/15191/54635/12931/16854/14573/22411/14118/21803/66208/17242/18049/16193/14560/22339/16449/17965/17319/66102/20750	54	Yes
TM2_MF_GO:0048407	TM2	MF	GO:0048407	platelet-derived growth factor binding	7/717	12/16912	1.57e-07	6.36e-06	5.52e-06	12843/12842/18595/18590/12833/12831/12825	7	Yes
TM2_MF_GO:0050431	TM2	MF	GO:0050431	transforming growth factor beta binding	6/717	23/16912	0.000308977	0.00511425	0.00444413	21825/268977/108075/235505/21809/16998	6	No
TM2_MF_GO:0050839	TM2	MF	GO:0050839	cell adhesion molecule binding	49/717	278/16912	1.27e-17	1.63e-15	1.41e-15	13723/14268/223272/20315/67916/16007/21825/23876/14219/107581/23964/12215/50706/11820/100038882/12558/22403/21858/13052/13612/109711/18133/19266/12552/11735/21828/80883/17304/67374/16777/100952/22295/20312/12845/14118/16785/170643/12828/17387/17886/16419/12876/16410/12825/70549/14089/17470/20750/53378	49	Yes
TM2_MF_GO:0050840	TM2	MF	GO:0050840	extracellular matrix binding	19/717	59/16912	1.86e-12	1.02e-10	8.86e-11	13179/20692/16007/21825/12111/14733/215798/94214/20563/21828/57764/13717/16854/16785/13601/16410/18073/22339/20750	19	Yes
TM2_MF_GO:0061134	TM2	MF	GO:0061134	peptidase regulator activity	26/717	198/16912	3.03e-07	1.11e-05	9.63e-06	20317/14268/14456/18542/14734/20319/13010/13036/11820/12389/74116/21858/232345/19122/12258/235505/13479/209378/21859/18787/50766/23980/20733/18049/12406/13014	26	Yes
TM2_MF_GO:0061135	TM2	MF	GO:0061135	endopeptidase regulator activity	20/717	168/16912	3.01e-05	0.000769574	0.000668736	20317/14456/20319/13010/11820/21858/232345/19122/12258/235505/13479/209378/21859/18787/50766/23980/20733/18049/12406/13014	20	No
TM2_MF_GO:0070851	TM2	MF	GO:0070851	growth factor receptor binding	18/717	139/16912	2.4e-05	0.000634586	0.000551435	18654/216616/18708/11820/15200/18595/18590/11600/71785/54635/14573/13601/12505/396184/16193/22339/22038/53378	18	No
TM2_MF_GO:1901681	TM2	MF	GO:1901681	sulfur compound binding	45/717	248/16912	8.9e-17	9.76e-15	8.48e-15	14268/18542/16007/21825/14219/12628/116847/20564/50706/21826/20356/11820/22403/15200/15945/14313/20377/11504/16997/11804/18133/17967/20563/21366/21828/78892/407800/21881/22240/15191/12845/18186/14118/81877/12831/58859/17242/320712/70370/237759/239405/22339/56615/68169/12814	45	Yes
TM3_BP_GO:0000187	TM3	BP	GO:0000187	activation of MAPK activity	11/534	115/17051	0.000966952	0.00968836	0.00700594	21825/16012/69183/15234/14745/18213/22418/21809/67397/16000/65964	11	No
TM3_BP_GO:0001101	TM3	BP	GO:0001101	response to acid chemical	13/534	97/17051	1.01e-05	0.000279311	0.000201978	12843/12842/12833/107581/17390/13649/12832/17392/18595/20194/12306/12877/12631	13	Yes
TM3_BP_GO:0001501	TM3	BP	GO:0001501	skeletal system development	53/534	474/17051	6.68e-16	5.16e-13	3.73e-13	17313/12111/12843/12628/17926/12842/239405/21825/20692/17242/15211/12394/18162/17390/12845/66175/12406/14313/14184/12832/21813/17684/19035/14451/12643/20319/20377/21803/20204/13601/72043/16948/18595/22418/14219/13038/21833/18741/18933/12306/329628/21809/21808/14182/27973/14119/16998/12167/16000/16854/17387/232174/13386	53	Yes
TM3_BP_GO:0001503	TM3	BP	GO:0001503	ossification	47/534	370/17051	2.36e-16	2.18e-13	1.58e-13	17313/12843/68713/17926/12842/239405/225998/17242/19242/14362/15081/12394/16477/20256/17390/12845/14184/14758/11732/20319/20377/21803/15078/13601/20750/16948/22418/14219/21847/114584/21833/11789/19225/18605/329628/14560/14200/14734/15903/14182/68588/14119/16998/12167/16000/17387/13386	47	Yes
TM3_BP_GO:0001558	TM3	BP	GO:0001558	regulation of cell growth	26/534	413/17051	0.000616669	0.00682909	0.00493832	20564/14268/16010/16971/13649/22403/29817/20315/14451/74116/20319/20377/21803/18213/22418/12818/17756/18605/12696/72269/21808/20358/12631/16000/14199/17387	26	Yes
TM3_BP_GO:0001569	TM3	BP	GO:0001569	branching involved in blood vessel morphogenesis	7/534	42/17051	0.000295809	0.00382487	0.00276588	17242/14254/20315/21813/20319/18741/14674	7	Yes
TM3_BP_GO:0001649	TM3	BP	GO:0001649	osteoblast differentiation	23/534	193/17051	4.07e-08	3.31e-06	2.39e-06	17926/12842/239405/225998/14362/15081/16477/20319/20377/15078/20750/16948/114584/11789/14560/14200/15903/14182/68588/14119/12167/16000/13386	23	Yes
TM3_BP_GO:0001654	TM3	BP	GO:0001654	eye development	29/534	385/17051	1.27e-05	0.000336121	0.000243059	12837/12628/225998/19242/14254/11826/77579/19378/11668/13649/14184/12832/21813/16917/17684/14451/270120/21803/18213/329941/18595/12215/11789/18741/21808/114715/16476/236266/12167	29	Yes
TM3_BP_GO:0001655	TM3	BP	GO:0001655	urogenital system development	31/534	350/17051	2.06e-07	1.24e-05	8.97e-06	22420/20317/12628/18073/21419/268902/11826/19378/21923/17390/73230/18993/16952/20377/21803/83675/20750/72043/19876/18595/22418/11789/18654/13653/329628/21808/14734/15903/14182/18027/16000	31	Yes
TM3_BP_GO:0001666	TM3	BP	GO:0001666	response to hypoxia	20/534	200/17051	4.98e-06	0.00016462	0.000119042	67749/11670/14254/16508/11826/17390/12389/17684/19883/11539/18654/11931/18751/13653/21809/21808/12877/18791/22027/18453	20	Yes
TM3_BP_GO:0001667	TM3	BP	GO:0001667	ameboidal-type cell migration	43/534	417/17051	6.53e-12	2.01e-09	1.46e-09	13179/20317/11475/15507/21825/20692/13036/11819/14268/17311/11826/73230/18187/114886/20315/21813/21857/16952/83397/21803/68792/11857/14645/68813/19876/13616/22418/12215/19225/21983/12558/11426/18741/21808/114715/16476/20358/14182/12631/14314/70097/16000/319565	43	Yes
TM3_BP_GO:0001736	TM3	BP	GO:0001736	establishment of planar polarity	9/534	61/17051	0.000110142	0.0017703	0.00128015	14362/20319/20377/70122/22418/329628/236266/14734/68588	9	No
TM3_BP_GO:0001763	TM3	BP	GO:0001763	morphogenesis of a branching structure	29/534	229/17051	1.6e-10	2.56e-08	1.85e-08	17313/22420/239405/17242/13036/14254/12876/72780/21923/20315/21813/15234/20319/20377/21803/12702/18595/64138/22418/20733/18654/18741/21817/329628/14734/14182/16000/14674/17387	29	Yes
TM3_BP_GO:0001764	TM3	BP	GO:0001764	neuron migration	17/534	181/17051	5.63e-05	0.0010511	0.000760083	17242/11819/13865/319387/77579/18187/20315/192176/16917/270120/14456/18213/399558/16177/18741/20358/215690	17	Yes
TM3_BP_GO:0001819	TM3	BP	GO:0001819	positive regulation of cytokine production	28/534	424/17051	0.000177228	0.00256002	0.00185122	17022/15507/21825/17242/16971/12759/12394/12010/16362/15234/16952/83397/17470/21803/16803/19883/72043/22418/12215/19225/16177/13653/15040/20742/14433/18578/14066/13386	28	No
TM3_BP_GO:0001822	TM3	BP	GO:0001822	kidney development	24/534	297/17051	2.29e-05	0.000536201	0.000387743	22420/12628/18073/21419/268902/11826/73230/18993/20377/21803/83675/20750/72043/19876/18595/22418/11789/18654/13653/329628/21808/14734/15903/14182	24	Yes
TM3_BP_GO:0001837	TM3	BP	GO:0001837	epithelial to mesenchymal transition	18/534	145/17051	6.61e-07	3.36e-05	2.43e-05	12842/17242/67888/192176/21813/20319/20377/21803/21804/13876/22418/14726/52662/21809/21808/114715/14182/80294	18	Yes
TM3_BP_GO:0001838	TM3	BP	GO:0001838	embryonic epithelial tube formation	13/534	150/17051	0.00088439	0.00909742	0.00657862	22420/14362/17684/20319/20377/21803/22418/20733/330409/21808/50768/68588/12631	13	No
TM3_BP_GO:0001841	TM3	BP	GO:0001841	neural tube formation	12/534	130/17051	0.000793683	0.00834298	0.00603305	14362/17684/20319/20377/21803/22418/20733/330409/21808/50768/68588/12631	12	No
TM3_BP_GO:0001843	TM3	BP	GO:0001843	neural tube closure	11/534	110/17051	0.000666342	0.00725765	0.00524822	14362/17684/20319/20377/21803/22418/20733/330409/21808/50768/68588	11	No
TM3_BP_GO:0001893	TM3	BP	GO:0001893	maternal placenta development	7/534	29/17051	2.43e-05	0.00056057	0.000405365	19242/11819/13039/16477/17684/19225/18783	7	Yes
TM3_BP_GO:0001935	TM3	BP	GO:0001935	endothelial cell proliferation	21/534	148/17051	7.18e-09	7.39e-07	5.34e-07	21825/20692/17242/14254/11819/21828/19378/73230/14184/20315/12389/13601/64103/22418/18654/11983/16476/14182/16000/14066/13386	21	Yes
TM3_BP_GO:0001936	TM3	BP	GO:0001936	regulation of endothelial cell proliferation	20/534	133/17051	5.92e-09	6.23e-07	4.5e-07	21825/20692/17242/14254/11819/21828/19378/14184/20315/12389/13601/64103/22418/18654/11983/16476/14182/16000/14066/13386	20	Yes
TM3_BP_GO:0001937	TM3	BP	GO:0001937	negative regulation of endothelial cell proliferation	8/534	43/17051	4.84e-05	0.00093009	0.000672576	21825/20692/14254/11819/12389/64103/11983/13386	8	No
TM3_BP_GO:0001938	TM3	BP	GO:0001938	positive regulation of endothelial cell proliferation	12/534	90/17051	2.33e-05	0.000542982	0.000392646	17242/21828/14184/20315/12389/13601/22418/18654/16476/14182/16000/14066	12	Yes
TM3_BP_GO:0001942	TM3	BP	GO:0001942	hair follicle development	11/534	104/17051	0.000412384	0.00499719	0.00361362	66042/13039/13167/12394/14313/13649/22418/11789/19225/235505/21808	11	No
TM3_BP_GO:0001952	TM3	BP	GO:0001952	regulation of cell-matrix adhesion	13/534	120/17051	9.9e-05	0.00162677	0.00117637	13405/11815/17926/21825/16971/107581/11856/14758/11426/20194/50768/12631/17387	13	Yes
TM3_BP_GO:0001953	TM3	BP	GO:0001953	negative regulation of cell-matrix adhesion	7/534	38/17051	0.000154185	0.00229437	0.00165913	11815/17926/21825/16971/11856/50768/17387	7	No
TM3_BP_GO:0002040	TM3	BP	GO:0002040	sprouting angiogenesis	12/534	121/17051	0.000415242	0.00500597	0.00361997	21825/14254/72780/73230/16952/68792/14645/19876/19225/18654/114715/20358	12	Yes
TM3_BP_GO:0002053	TM3	BP	GO:0002053	positive regulation of mesenchymal cell proliferation	6/534	36/17051	0.000802849	0.00838914	0.00606644	21813/14451/20204/22418/18933/14182	6	Yes
TM3_BP_GO:0002062	TM3	BP	GO:0002062	chondrocyte differentiation	14/534	101/17051	3.1e-06	0.000112943	8.17e-05	17242/12394/12845/66175/12406/21813/20319/21803/13601/72043/14219/14182/16998/12167	14	Yes
TM3_BP_GO:0002063	TM3	BP	GO:0002063	chondrocyte development	6/534	29/17051	0.000235729	0.00319293	0.0023089	12845/12406/21813/20319/13601/72043	6	Yes
TM3_BP_GO:0002573	TM3	BP	GO:0002573	myeloid leukocyte differentiation	19/534	216/17051	5.18e-05	0.000986525	0.000713386	83924/19659/14281/18103/17311/12394/16477/14184/21813/17684/20377/21803/21847/11789/12306/235505/16476/14734/13386	19	Yes
TM3_BP_GO:0002683	TM3	BP	GO:0002683	negative regulation of immune system process	28/534	402/17051	7.19e-05	0.0013052	0.00094383	83924/11815/15507/21825/242202/17242/18103/17311/12394/16362/20315/14190/56213/17965/16952/20377/17470/21803/12258/232345/11539/109815/15040/21809/21808/16000/16854/16423	28	Yes
TM3_BP_GO:0002685	TM3	BP	GO:0002685	regulation of leukocyte migration	25/534	213/17051	1.43e-08	1.35e-06	9.74e-07	11815/21825/17242/19242/17311/21828/11754/57266/20315/12527/17965/16952/17470/21803/16803/14456/13601/13616/22418/11539/18654/16177/71660/16854/17387	25	Yes
TM3_BP_GO:0002687	TM3	BP	GO:0002687	positive regulation of leukocyte migration	18/534	148/17051	8.97e-07	4.15e-05	3e-05	21825/17242/19242/17311/21828/11754/57266/20315/21803/16803/14456/13616/22418/18654/16177/71660/16854/17387	18	Yes
TM3_BP_GO:0002688	TM3	BP	GO:0002688	regulation of leukocyte chemotaxis	13/534	118/17051	8.32e-05	0.00146479	0.00105923	21825/17242/19242/21828/57266/20315/17965/16803/14456/13616/22418/18654/71660	13	Yes
TM3_BP_GO:0002690	TM3	BP	GO:0002690	positive regulation of leukocyte chemotaxis	12/534	93/17051	3.26e-05	0.000714851	0.00051693	21825/17242/19242/21828/57266/20315/16803/14456/13616/22418/18654/71660	12	Yes
TM3_BP_GO:0002761	TM3	BP	GO:0002761	regulation of myeloid leukocyte differentiation	13/534	123/17051	0.000127473	0.00198389	0.00143461	83924/19659/14281/18103/17311/12394/14184/20377/21803/21847/11789/16476/13386	13	Yes
TM3_BP_GO:0002790	TM3	BP	GO:0002790	peptide secretion	26/534	410/17051	0.000553286	0.00632385	0.00457297	21419/12876/16971/11826/78896/77579/12845/68428/13649/53322/224129/16952/20377/17470/21803/68581/14645/13616/12215/11539/18111/21809/21808/52377/67397/16000	26	Yes
TM3_BP_GO:0003002	TM3	BP	GO:0003002	regionalization	26/534	320/17051	9.55e-06	0.000264664	0.000191387	68713/66042/11819/13865/268902/19378/18187/16917/17684/79362/17965/14451/20319/20377/70122/19876/22418/11789/18741/13082/14734/14182/18845/12167/20893/232174	26	No
TM3_BP_GO:0003007	TM3	BP	GO:0003007	heart morphogenesis	25/534	256/17051	5.21e-07	2.84e-05	2.05e-05	21825/12876/20564/268902/14362/22003/19378/67888/18187/192176/21813/17684/20319/21803/399558/19876/13876/22418/18741/329628/21808/14200/16476/17069/50768	25	Yes
TM3_BP_GO:0003012	TM3	BP	GO:0003012	muscle system process	28/534	387/17051	3.69e-05	0.00077383	0.00055958	13405/11475/17926/12293/22004/242202/107589/17904/22003/12845/192176/12389/56188/74116/72043/68813/13616/14219/11539/19225/12818/21955/11931/13400/11534/11603/18578/16000	28	Yes
TM3_BP_GO:0003013	TM3	BP	GO:0003013	circulatory system process	40/534	490/17051	3.34e-08	2.76e-06	2e-06	13405/12843/11475/53419/12293/242202/11819/64817/52589/16971/11754/22003/18162/17390/12845/54611/13649/192176/12389/56188/83397/21803/14456/68813/13616/14678/14219/11539/21833/19225/27360/11931/59027/13400/71660/74617/21808/16456/11603/18578	40	Yes
TM3_BP_GO:0003015	TM3	BP	GO:0003015	heart process	17/534	222/17051	0.000646666	0.0070934	0.00512945	13405/12293/242202/22003/192176/12389/56188/13616/14678/14219/11539/21833/11931/13400/21808/11603/18578	17	Yes
TM3_BP_GO:0003018	TM3	BP	GO:0003018	vascular process in circulatory system	16/534	210/17051	0.00097381	0.00971501	0.00702521	11475/242202/16971/17390/12845/54611/13649/12389/83397/21803/68813/13616/11539/19225/27360/74617	16	Yes
TM3_BP_GO:0003151	TM3	BP	GO:0003151	outflow tract morphogenesis	12/534	78/17051	5.2e-06	0.000168439	0.000121803	21825/268902/14362/18187/21813/17684/20319/19876/22418/18741/21808/16476	12	Yes
TM3_BP_GO:0003170	TM3	BP	GO:0003170	heart valve development	8/534	57/17051	0.000375875	0.00466468	0.00337317	20564/268902/21813/21803/19876/13876/18741/21808	8	No
TM3_BP_GO:0003179	TM3	BP	GO:0003179	heart valve morphogenesis	7/534	47/17051	0.000602553	0.00670485	0.00484848	20564/268902/21813/21803/19876/13876/21808	7	No
TM3_BP_GO:0003197	TM3	BP	GO:0003197	endocardial cushion development	8/534	47/17051	9.41e-05	0.00161086	0.00116486	21825/268902/67888/21813/17684/19876/13876/21808	8	No
TM3_BP_GO:0003205	TM3	BP	GO:0003205	cardiac chamber development	19/534	180/17051	3.88e-06	0.000132073	9.55e-05	268977/12876/20564/268902/16971/14362/22003/77579/18187/21813/17684/20319/21803/19876/22418/18741/21808/14200/17069	19	Yes
TM3_BP_GO:0003206	TM3	BP	GO:0003206	cardiac chamber morphogenesis	16/534	134/17051	4.6e-06	0.000153614	0.000111083	12876/20564/268902/14362/22003/18187/21813/17684/20319/21803/19876/22418/18741/21808/14200/17069	16	Yes
TM3_BP_GO:0003214	TM3	BP	GO:0003214	cardiac left ventricle morphogenesis	4/534	14/17051	0.000741293	0.00788838	0.00570433	12876/21813/20319/21808	4	No
TM3_BP_GO:0003231	TM3	BP	GO:0003231	cardiac ventricle development	15/534	132/17051	1.66e-05	0.000403043	0.000291452	268977/12876/20564/268902/14362/22003/21813/17684/20319/21803/19876/22418/18741/21808/17069	15	Yes
TM3_BP_GO:0003272	TM3	BP	GO:0003272	endocardial cushion formation	5/534	25/17051	0.000934155	0.00940044	0.00679774	268902/67888/21813/19876/21808	5	No
TM3_BP_GO:0003279	TM3	BP	GO:0003279	cardiac septum development	13/534	119/17051	9.08e-05	0.00158034	0.00114279	268977/20564/268902/16971/14362/77579/18187/21813/17684/19876/22418/18741/21808	13	Yes
TM3_BP_GO:0003281	TM3	BP	GO:0003281	ventricular septum development	10/534	78/17051	0.000155139	0.00229437	0.00165913	268977/20564/268902/14362/21813/17684/19876/22418/18741/21808	10	Yes
TM3_BP_GO:0006936	TM3	BP	GO:0006936	muscle contraction	23/534	285/17051	3.45e-05	0.000741854	0.000536457	13405/11475/12293/22004/242202/107589/17904/22003/12845/192176/12389/56188/72043/68813/13616/14219/11539/19225/21955/11931/13400/11603/18578	23	Yes
TM3_BP_GO:0006937	TM3	BP	GO:0006937	regulation of muscle contraction	13/534	148/17051	0.000780122	0.00824471	0.005962	13405/242202/12389/56188/68813/14219/11539/19225/21955/11931/13400/11603/18578	13	Yes
TM3_BP_GO:0006941	TM3	BP	GO:0006941	striated muscle contraction	14/534	157/17051	0.000426473	0.00511436	0.00369835	13405/12293/242202/22003/192176/12389/56188/14219/11539/21955/11931/13400/11603/18578	14	Yes
TM3_BP_GO:0006942	TM3	BP	GO:0006942	regulation of striated muscle contraction	10/534	78/17051	0.000155139	0.00229437	0.00165913	13405/242202/12389/56188/14219/11539/11931/13400/11603/18578	10	Yes
TM3_BP_GO:0006979	TM3	BP	GO:0006979	response to oxidative stress	26/534	391/17051	0.000268781	0.00354469	0.00256327	11815/13010/15507/21825/14281/23876/11826/14362/11668/17390/19663/13649/114886/15234/17392/16952/18595/109815/15505/19225/56338/22427/16476/12631/18453/11758	26	Yes
TM3_BP_GO:0007044	TM3	BP	GO:0007044	cell-substrate junction assembly	12/534	92/17051	2.92e-05	0.000662974	0.000479417	11815/17926/14268/16971/107581/11856/14758/11426/20194/50768/12631/17387	12	Yes
TM3_BP_GO:0007157	TM3	BP	GO:0007157	heterophilic cell-cell adhesion via plasma membrane cell adhesion molecules	8/534	47/17051	9.41e-05	0.00161086	0.00116486	192167/19266/23964/224024/331461/12558/329628/11658	8	No
TM3_BP_GO:0007160	TM3	BP	GO:0007160	cell-matrix adhesion	18/534	211/17051	0.00011994	0.00190137	0.00137494	13405/11815/18073/17926/21825/14268/16971/223272/107581/11856/14758/16419/14219/11426/20194/50768/12631/17387	18	Yes
TM3_BP_GO:0007162	TM3	BP	GO:0007162	negative regulation of cell adhesion	26/534	286/17051	1.22e-06	5.23e-05	3.78e-05	11815/14114/15507/17926/12842/21825/242202/17242/16971/12394/21923/17390/16362/20315/11856/14190/12527/16952/21803/20733/50768/20358/18845/12631/16854/17387	26	Yes
TM3_BP_GO:0007164	TM3	BP	GO:0007164	establishment of tissue polarity	9/534	62/17051	0.000125323	0.00195986	0.00141723	14362/20319/20377/70122/22418/329628/236266/14734/68588	9	No
TM3_BP_GO:0007178	TM3	BP	GO:0007178	transmembrane receptor protein serine/threonine kinase signaling pathway	42/534	337/17051	1.94e-14	1.12e-11	8.11e-12	12843/21419/66042/268977/21825/14281/15211/14362/12845/73230/67888/19663/14313/12389/50791/21813/56213/17684/17965/20319/65112/20377/21803/21804/16419/16948/22418/52662/13653/108075/21809/235505/14560/21808/114715/16476/14734/20742/14119/16998/12167/14314	42	Yes
TM3_BP_GO:0007179	TM3	BP	GO:0007179	transforming growth factor beta receptor signaling pathway	23/534	171/17051	3.97e-09	4.6e-07	3.33e-07	12843/268977/21825/14281/12389/21813/56213/17684/65112/21803/21804/16419/16948/52662/108075/21809/235505/21808/114715/16476/14119/16998/12167	23	Yes
TM3_BP_GO:0007263	TM3	BP	GO:0007263	nitric oxide mediated signal transduction	6/534	23/17051	5.88e-05	0.00108386	0.000783773	21825/242202/17750/13649/17748/19416	6	Yes
TM3_BP_GO:0007272	TM3	BP	GO:0007272	ensheathment of neurons	14/534	152/17051	0.000306226	0.0039158	0.00283163	17926/19242/15211/12759/14184/12527/15234/21803/18213/12558/14733/16000/17988/11496	14	No
TM3_BP_GO:0007292	TM3	BP	GO:0007292	female gamete generation	14/534	145/17051	0.000187294	0.00260635	0.00188473	242202/17242/19242/50915/15081/54611/22187/15078/19225/236266/18783/18791/12167/16000	14	No
TM3_BP_GO:0007389	TM3	BP	GO:0007389	pattern specification process	30/534	407/17051	1.37e-05	0.000351563	0.000254225	22420/68713/66042/11819/13865/268902/19378/14313/18187/21813/16917/17684/79362/17965/14451/20319/20377/83675/70122/19876/22418/11789/18741/13082/14734/14182/18845/12167/20893/232174	30	No
TM3_BP_GO:0007409	TM3	BP	GO:0007409	axonogenesis	31/534	448/17051	3.38e-05	0.000730124	0.000527974	246048/241568/17967/22253/20564/14268/268902/16971/77579/14184/18187/20315/23964/14451/18213/399558/19876/22418/12215/11789/17756/12558/21808/68810/20358/226251/11603/18845/12167/75847/11658	31	No
TM3_BP_GO:0007411	TM3	BP	GO:0007411	axon guidance	23/534	228/17051	8.43e-07	4.02e-05	2.91e-05	17967/22253/20564/268902/16971/77579/18187/20315/23964/14451/399558/19876/22418/12215/21808/68810/20358/226251/11603/18845/12167/75847/11658	23	No
TM3_BP_GO:0007416	TM3	BP	GO:0007416	synapse assembly	19/534	187/17051	6.79e-06	0.000208141	0.000150513	192167/319387/14362/19266/242384/21826/50791/68792/18213/399558/22418/331461/21983/12558/396184/17920/320840/103967/11603	19	No
TM3_BP_GO:0007517	TM3	BP	GO:0007517	muscle organ development	23/534	315/17051	0.000157577	0.00231563	0.0016745	13405/56312/107589/11819/17904/14281/14362/22003/12389/17684/21803/16948/22418/210719/18741/13653/11910/14733/21808/17069/15903/11906/232174	23	Yes
[truncated: 462 more rows]
