# Supplementary material for: Single-cell profiling of trabecular meshwork identifies mitochondrial dysfunction in a glaucoma model that is protected by vitamin B3 treatment
Source: eLife. 2026 Jan 20;14:RP107161. doi: 10.7554/eLife.107161 (PMC12818872; doi:10.7554/eLife.107161)
Supplement: Supplementary file 2. [file elife-107161-supp2.xlsx]

## Sheet: File 2
SYMBOL	p_val	avg_log2FC	pct.1	pct.2	p_val_adj	Comparison
Col1a1	0	1.04772	0.769	0.464	0	All_TM_vs_all_other_cells
Tagln	0	1.05879	0.686	0.504	0	All_TM_vs_all_other_cells
Col1a2	0	1.11297	0.821	0.49	0	All_TM_vs_all_other_cells
Sparc	0	0.812504	0.858	0.611	0	All_TM_vs_all_other_cells
Cst3	0	0.47227	0.946	0.891	0	All_TM_vs_all_other_cells
Col3a1	0	0.727452	0.653	0.361	0	All_TM_vs_all_other_cells
Apod	0	0.989635	0.706	0.39	0	All_TM_vs_all_other_cells
Gsto1	0	-0.967572	0.347	0.636	0	All_TM_vs_all_other_cells
Stfa1	0	-0.442355	0.096	0.478	0	All_TM_vs_all_other_cells
Cstdc5	0	-1.16743	0.275	0.598	0	All_TM_vs_all_other_cells
Mgp	0	1.43601	0.944	0.49	0	All_TM_vs_all_other_cells
Igfbp5	0	1.16302	0.863	0.537	0	All_TM_vs_all_other_cells
Serpinf1	0	1.3032	0.815	0.384	0	All_TM_vs_all_other_cells
Lum	0	0.942196	0.708	0.439	0	All_TM_vs_all_other_cells
Ccn2	0	1.0483	0.713	0.462	0	All_TM_vs_all_other_cells
Cbr2	0	-0.663236	0.176	0.547	0	All_TM_vs_all_other_cells
Dcn	0	1.30766	0.959	0.552	0	All_TM_vs_all_other_cells
Upk3bl	0	-1.08729	0.152	0.562	0	All_TM_vs_all_other_cells
Rbp2	0	-0.84679	0.167	0.512	0	All_TM_vs_all_other_cells
Plet1	0	-0.590389	0.112	0.494	0	All_TM_vs_all_other_cells
Aqp5	0	-1.11375	0.177	0.525	0	All_TM_vs_all_other_cells
Ogn	0	0.839135	0.642	0.426	0	All_TM_vs_all_other_cells
Elf3	0	-0.57494	0.117	0.489	0	All_TM_vs_all_other_cells
S100a14	0	-0.712325	0.13	0.517	0	All_TM_vs_all_other_cells
Cldn7	0	-1.06802	0.248	0.577	0	All_TM_vs_all_other_cells
Lgals3	0	-0.822956	0.214	0.583	0	All_TM_vs_all_other_cells
Serpine2	0	1.41207	0.855	0.373	0	All_TM_vs_all_other_cells
Apoc1	0	-0.619334	0.132	0.543	0	All_TM_vs_all_other_cells
Fdps	0	-0.567559	0.259	0.585	0	All_TM_vs_all_other_cells
Fgfbp1	0	-0.752904	0.088	0.54	0	All_TM_vs_all_other_cells
Timp3	0	0.74566	0.786	0.652	0	All_TM_vs_all_other_cells
S100a10	0	-0.588108	0.58	0.769	0	All_TM_vs_all_other_cells
Bgn	0	1.08668	0.809	0.518	0	All_TM_vs_all_other_cells
Cdkn1c	0	0.659567	0.55	0.283	0	All_TM_vs_all_other_cells
Tpm1	0	0.729308	0.724	0.513	0	All_TM_vs_all_other_cells
Calml3	0	-1.05685	0.234	0.575	0	All_TM_vs_all_other_cells
Igfbp4	0	0.912643	0.683	0.365	0	All_TM_vs_all_other_cells
Apoe	0	0.46303	0.924	0.818	0	All_TM_vs_all_other_cells
Ly6e	0	-0.500845	0.272	0.636	0	All_TM_vs_all_other_cells
Klf2	0	0.646369	0.885	0.664	0	All_TM_vs_all_other_cells
Hmcn1	0	0.765737	0.603	0.341	0	All_TM_vs_all_other_cells
Pcolce	0	0.91708	0.766	0.466	0	All_TM_vs_all_other_cells
Tkt	0	-0.830322	0.342	0.684	0	All_TM_vs_all_other_cells
Timp2	0	0.802915	0.831	0.621	0	All_TM_vs_all_other_cells
Perp	0	-1.04621	0.209	0.623	0	All_TM_vs_all_other_cells
Rarres2	0	0.725612	0.677	0.471	0	All_TM_vs_all_other_cells
Igfbp7	0	0.929751	0.97	0.725	0	All_TM_vs_all_other_cells
Krt12	0	-1.24369	0.269	0.579	0	All_TM_vs_all_other_cells
2610528A11Rik	0	-0.859986	0.143	0.54	0	All_TM_vs_all_other_cells
Sfn	0	-1.30298	0.149	0.596	0	All_TM_vs_all_other_cells
Smoc1	0	0.644961	0.482	0.197	0	All_TM_vs_all_other_cells
Serping1	0	0.936376	0.761	0.38	0	All_TM_vs_all_other_cells
Aqp3	0	-0.997516	0.228	0.614	0	All_TM_vs_all_other_cells
Plpp3	0	0.935756	0.782	0.437	0	All_TM_vs_all_other_cells
Dapl1	0	-1.07014	0.224	0.619	0	All_TM_vs_all_other_cells
Lgals1	0	0.919022	0.802	0.471	0	All_TM_vs_all_other_cells
Gsta4	0	-1.00133	0.468	0.705	0	All_TM_vs_all_other_cells
Mdk	0	1.00202	0.791	0.472	0	All_TM_vs_all_other_cells
Col17a1	0	-0.760822	0.124	0.519	0	All_TM_vs_all_other_cells
Tacstd2	0	-0.676168	0.134	0.543	0	All_TM_vs_all_other_cells
Dpysl3	0	0.725773	0.616	0.344	0	All_TM_vs_all_other_cells
Loxl1	0	0.697094	0.549	0.269	0	All_TM_vs_all_other_cells
Trim29	0	-0.732054	0.122	0.575	0	All_TM_vs_all_other_cells
Adss	0	-0.451442	0.193	0.555	0	All_TM_vs_all_other_cells
Ndufa4	0	-0.344991	0.911	0.945	0	All_TM_vs_all_other_cells
Dsp	0	-0.830298	0.176	0.553	0	All_TM_vs_all_other_cells
Ifi202b	0	-0.596725	0.089	0.482	0	All_TM_vs_all_other_cells
Urah	0	-0.741249	0.129	0.511	0	All_TM_vs_all_other_cells
Abi3bp	0	0.838511	0.758	0.567	0	All_TM_vs_all_other_cells
Cebpd	0	0.680638	0.881	0.722	0	All_TM_vs_all_other_cells
Pmepa1	0	0.693172	0.629	0.367	0	All_TM_vs_all_other_cells
Epcam	0	-0.552854	0.111	0.514	0	All_TM_vs_all_other_cells
Krt5	0	-1.36715	0.187	0.607	0	All_TM_vs_all_other_cells
Aldh3a1	0	-1.0349	0.316	0.615	0	All_TM_vs_all_other_cells
Tmsb4x	0	-0.26463	0.967	0.968	0	All_TM_vs_all_other_cells
Adh7	0	-0.732532	0.249	0.562	0	All_TM_vs_all_other_cells
Fxyd3	0	-1.08343	0.186	0.597	0	All_TM_vs_all_other_cells
Dsc3	0	-0.634428	0.223	0.573	0	All_TM_vs_all_other_cells
Gsta3	0	-0.595805	0.281	0.626	0	All_TM_vs_all_other_cells
Ikzf2	0	-0.354757	0.109	0.458	0	All_TM_vs_all_other_cells
S100a16	0	-0.576822	0.339	0.646	0	All_TM_vs_all_other_cells
Cped1	0	0.914512	0.763	0.452	0	All_TM_vs_all_other_cells
Sdc1	0	-0.561843	0.221	0.574	0	All_TM_vs_all_other_cells
Cygb	0	2.18654	0.727	0.18	0	TM2_vs_other_TM
Ogfrl1	0	2.68891	0.799	0.231	0	TM3_vs_other_TM
Tagln	0	3.535	0.895	0.259	0	TM3_vs_other_TM
Ecrg4	0	3.70967	0.791	0.201	0	TM1_vs_all_other_TM
Fn1	0	2.36478	0.659	0.102	0	TM1_vs_all_other_TM
Igfbp2	0	3.59164	0.798	0.215	0	TM1_vs_all_other_TM
Fmod	0	3.3193	0.824	0.146	0	TM1_vs_all_other_TM
Col1a2	0	2.53188	0.96	0.701	0	TM1_vs_all_other_TM
Col12a1	0	2.57615	0.828	0.231	0	TM1_vs_all_other_TM
Dcn	0	2.08509	0.996	0.938	0	TM1_vs_all_other_TM
Sparc	0	2.57303	0.971	0.764	0	TM1_vs_all_other_TM
Serpinf1	0	2.18991	0.98	0.693	0	TM1_vs_all_other_TM
Clu	0	2.51413	0.934	0.461	0	TM1_vs_all_other_TM
Ostf1	5.48e-308	-0.474888	0.25	0.612	1.1e-304	All_TM_vs_all_other_cells
Rbp1	9.58e-307	0.456386	0.827	0.74	1.92e-303	All_TM_vs_all_other_cells
2200002D01Rik	3.15e-303	-0.728581	0.293	0.589	6.3e-300	All_TM_vs_all_other_cells
Rab25	3.26e-302	-0.672317	0.167	0.521	6.52e-299	All_TM_vs_all_other_cells
Cxcl12	3.22e-301	-2.60795	0.179	0.776	6.33e-297	TM1_vs_all_other_TM
Krt15	2.49e-298	-0.983797	0.243	0.562	4.98e-295	All_TM_vs_all_other_cells
Mal	5.69e-298	-0.969772	0.171	0.515	1.14e-294	All_TM_vs_all_other_cells
Acta2	2.06e-297	3.22212	0.726	0.216	4.04e-293	TM3_vs_other_TM
Cd63	2.37e-296	0.555672	0.814	0.656	4.73e-293	All_TM_vs_all_other_cells
Upk1b	5.4e-294	-0.474635	0.092	0.451	1.08e-290	All_TM_vs_all_other_cells
Aebp1	9.86e-294	0.764572	0.621	0.453	1.97e-290	All_TM_vs_all_other_cells
Defb1	1.43e-291	-0.557228	0.166	0.498	2.86e-288	All_TM_vs_all_other_cells
Myl6	7.33e-292	1.51151	0.979	0.904	1.44e-287	TM3_vs_other_TM
Igfbp5	1.66e-291	1.83847	0.98	0.779	3.25e-287	TM2_vs_other_TM
Tmem100	1.36e-290	2.04664	0.657	0.125	2.66e-286	TM2_vs_other_TM
Acta2	2.89e-287	0.860103	0.633	0.508	5.77e-284	All_TM_vs_all_other_cells
Thbs1	1.03e-286	2.23653	0.795	0.284	2.01e-282	TM1_vs_all_other_TM
Pdzk1ip1	3.23e-285	-0.683027	0.172	0.49	6.46e-282	All_TM_vs_all_other_cells
Cldn10	2.62e-282	2.89273	0.484	0.031	5.15e-278	TM1_vs_all_other_TM
Myl9	9.07e-281	0.757285	0.604	0.444	1.81e-277	All_TM_vs_all_other_cells
Egln3	1.48e-280	-0.410817	0.12	0.448	2.95e-277	All_TM_vs_all_other_cells
Lypd2	2.52e-280	-1.20446	0.215	0.523	5.03e-277	All_TM_vs_all_other_cells
H2afz	5.67e-278	-0.330886	0.774	0.864	1.13e-274	All_TM_vs_all_other_cells
Cldn4	1.08e-277	-0.687307	0.237	0.535	2.15e-274	All_TM_vs_all_other_cells
Klf6	9.8e-276	-0.506494	0.423	0.728	1.96e-272	All_TM_vs_all_other_cells
Jup	4.67e-273	-0.566854	0.263	0.574	9.34e-270	All_TM_vs_all_other_cells
Eln	7.07e-270	0.753771	0.556	0.352	1.41e-266	All_TM_vs_all_other_cells
Myl9	2e-269	2.10913	0.754	0.302	3.92e-265	TM3_vs_other_TM
Dsg3	2.54e-267	-0.463893	0.136	0.478	5.08e-264	All_TM_vs_all_other_cells
Pkp1	1.84e-266	-0.40628	0.118	0.434	3.69e-263	All_TM_vs_all_other_cells
Mt2	1.14e-262	-0.589154	0.503	0.734	2.28e-259	All_TM_vs_all_other_cells
Fam83a	6.81e-260	-0.385639	0.06	0.411	1.36e-256	All_TM_vs_all_other_cells
Rab11a	4.73e-259	-0.396939	0.23	0.564	9.46e-256	All_TM_vs_all_other_cells
Adh1	3.2e-257	-0.342233	0.227	0.507	6.39e-254	All_TM_vs_all_other_cells
Fmod	9.53e-255	0.801976	0.524	0.323	1.91e-251	All_TM_vs_all_other_cells
Ccdc80	3.41e-254	0.755768	0.503	0.279	6.81e-251	All_TM_vs_all_other_cells
Myoc	6.38e-254	0.84348	0.44	0.216	1.28e-250	All_TM_vs_all_other_cells
Col8a2	1.1e-252	0.627486	0.481	0.215	2.2e-249	All_TM_vs_all_other_cells
Edn3	1.48e-252	1.86157	0.739	0.246	2.9e-248	TM2_vs_other_TM
Capg	7.14e-249	-0.522647	0.221	0.549	1.43e-245	All_TM_vs_all_other_cells
Col1a1	4.89e-248	2.66148	0.905	0.596	9.61e-244	TM1_vs_all_other_TM
Gpr137b	5.91e-247	2.16149	0.496	0.061	1.16e-242	TM3_vs_other_TM
Krt14	4.34e-245	-0.813324	0.179	0.493	8.68e-242	All_TM_vs_all_other_cells
Slurp1	1.75e-242	-1.13059	0.343	0.576	3.49e-239	All_TM_vs_all_other_cells
Ecrg4	2.28e-242	0.927918	0.527	0.345	4.55e-239	All_TM_vs_all_other_cells
Serpinh1	1.53e-241	0.560024	0.603	0.428	3.06e-238	All_TM_vs_all_other_cells
Ldlr	1.94e-241	-0.339762	0.296	0.573	3.89e-238	All_TM_vs_all_other_cells
Vim	2.2e-240	0.534919	0.766	0.605	4.4e-237	All_TM_vs_all_other_cells
Col12a1	3.65e-240	0.762128	0.542	0.355	7.29e-237	All_TM_vs_all_other_cells
Emb	2.23e-240	1.68189	0.689	0.182	4.38e-236	TM1_vs_all_other_TM
Irf6	1.83e-238	-0.414575	0.161	0.467	3.65e-235	All_TM_vs_all_other_cells
Pycard	3.73e-235	-0.486895	0.211	0.522	7.45e-232	All_TM_vs_all_other_cells
Wfdc2	3.76e-235	-0.552035	0.239	0.525	7.51e-232	All_TM_vs_all_other_cells
Dkk2	5.65e-235	0.555427	0.555	0.317	1.13e-231	All_TM_vs_all_other_cells
Tmprss11g	7.07e-235	-0.514134	0.207	0.491	1.41e-231	All_TM_vs_all_other_cells
Crispld2	2.88e-234	0.610194	0.54	0.316	5.76e-231	All_TM_vs_all_other_cells
Anxa1	7.84e-234	-0.565316	0.399	0.623	1.57e-230	All_TM_vs_all_other_cells
Mpzl2	2.33e-232	-0.368396	0.117	0.428	4.65e-229	All_TM_vs_all_other_cells
Cxcl12	4.75e-232	0.78155	0.616	0.452	9.5e-229	All_TM_vs_all_other_cells
Gsn	1.43e-228	0.419293	0.731	0.622	2.85e-225	All_TM_vs_all_other_cells
Dsc2	7.14e-228	-0.486686	0.22	0.505	1.43e-224	All_TM_vs_all_other_cells
Dcn	1.59e-227	-1.89389	0.923	0.977	3.13e-223	TM3_vs_other_TM
Serpinf1	2.99e-227	-1.97141	0.607	0.891	5.86e-223	TM3_vs_other_TM
Lgals7	5.82e-226	-0.583493	0.26	0.51	1.16e-222	All_TM_vs_all_other_cells
Cpxm1	1.02e-225	0.768035	0.512	0.332	2.03e-222	All_TM_vs_all_other_cells
Col6a3	1.68e-225	1.60783	0.534	0.088	3.3e-221	TM1_vs_all_other_TM
Tagln	1.44e-224	-4.06821	0.127	0.653	2.83e-220	TM2_vs_other_TM
Bgn	3.08e-223	1.40498	0.941	0.698	6.05e-219	TM1_vs_all_other_TM
Wnt6	4.91e-223	1.65715	0.421	0.032	9.63e-219	TM3_vs_other_TM
Fabp5	6.86e-220	-0.638675	0.215	0.508	1.37e-216	All_TM_vs_all_other_cells
Aebp1	1.04e-220	1.56828	0.814	0.4	2.04e-216	TM1_vs_all_other_TM
Kitl	1.27e-219	1.7566	0.61	0.156	2.49e-215	TM2_vs_other_TM
Ccn1	2.63e-219	1.82922	0.736	0.258	5.16e-215	TM1_vs_all_other_TM
Icam1	1.89e-215	0.526008	0.506	0.314	3.77e-212	All_TM_vs_all_other_cells
Sfrp2	3.07e-216	2.96182	0.399	0.03	6.03e-212	TM1_vs_all_other_TM
Igfbp6	5.24e-214	0.756831	0.514	0.349	1.05e-210	All_TM_vs_all_other_cells
Ctsk	1.22e-213	0.587553	0.468	0.232	2.43e-210	All_TM_vs_all_other_cells
Ccnd1	3.07e-212	-0.408434	0.169	0.475	6.15e-209	All_TM_vs_all_other_cells
Dhcr24	2.1e-211	-0.377153	0.269	0.525	4.21e-208	All_TM_vs_all_other_cells
Pgf	1.17e-211	1.87318	0.492	0.078	2.3e-207	TM2_vs_other_TM
Ifitm3	2.72e-210	0.386176	0.908	0.839	5.44e-207	All_TM_vs_all_other_cells
S100a11	8.02e-208	-0.323916	0.779	0.797	1.6e-204	All_TM_vs_all_other_cells
Ptgis	1.29e-207	0.581613	0.434	0.172	2.58e-204	All_TM_vs_all_other_cells
Thbs1	1.44e-207	0.773331	0.538	0.39	2.88e-204	All_TM_vs_all_other_cells
Gas6	2.26e-207	1.7009	0.813	0.432	4.44e-203	TM1_vs_all_other_TM
Apod	8.17e-206	1.76336	0.866	0.497	1.6e-201	TM1_vs_all_other_TM
Gpha2	6.95e-202	3.42908	0.38	0.029	1.37e-197	TM1_vs_all_other_TM
Zfp750	1.17e-200	-0.261866	0.095	0.371	2.35e-197	All_TM_vs_all_other_cells
Timp3	7.59e-201	-1.84462	0.568	0.852	1.49e-196	TM3_vs_other_TM
Itgbl1	2.27e-200	1.63609	0.642	0.201	4.45e-196	TM1_vs_all_other_TM
Lypd1	2.55e-200	1.74488	0.332	0.007	5.01e-196	TM3_vs_other_TM
Mdk	5.17e-200	1.2532	0.902	0.692	1.02e-195	TM3_vs_other_TM
Gsta2	1.55e-198	-0.555509	0.158	0.476	3.11e-195	All_TM_vs_all_other_cells
Meg3	4.54e-198	0.644887	0.533	0.38	9.09e-195	All_TM_vs_all_other_cells
Acsl1	2.24e-196	-0.264273	0.143	0.43	4.48e-193	All_TM_vs_all_other_cells
Atp6v1e1	7.22e-196	-0.386897	0.44	0.698	1.44e-192	All_TM_vs_all_other_cells
Slc12a2	2.14e-195	0.541887	0.564	0.443	4.29e-192	All_TM_vs_all_other_cells
Paqr5	2.94e-195	-0.293777	0.103	0.419	5.88e-192	All_TM_vs_all_other_cells
Slc6a6	3.69e-195	0.449569	0.713	0.611	7.37e-192	All_TM_vs_all_other_cells
Itgb4	6.34e-195	-0.260617	0.097	0.373	1.27e-191	All_TM_vs_all_other_cells
Mgp	1.93e-195	-1.55314	0.831	0.98	3.79e-191	TM3_vs_other_TM
Myoc	2.13e-194	1.93567	0.61	0.152	4.19e-190	TM1_vs_all_other_TM
Prdx5	6.75e-193	-0.39584	0.548	0.727	1.35e-189	All_TM_vs_all_other_cells
Gyg	2.26e-192	-0.456985	0.186	0.47	4.52e-189	All_TM_vs_all_other_cells
Postn	3.12e-192	0.476887	0.447	0.263	6.25e-189	All_TM_vs_all_other_cells
Crb3	1.47e-190	-0.278069	0.053	0.389	2.93e-187	All_TM_vs_all_other_cells
Trpm3	8.72e-190	-0.297779	0.272	0.512	1.74e-186	All_TM_vs_all_other_cells
Plac8	1.47e-189	-0.513387	0.163	0.453	2.94e-186	All_TM_vs_all_other_cells
Nupr1	1.7e-189	0.573302	0.725	0.634	3.4e-186	All_TM_vs_all_other_cells
Ogfrl1	8.8e-190	-2.86187	0.133	0.587	1.73e-185	TM1_vs_all_other_TM
Evpl	1e-187	-0.542822	0.204	0.465	2e-184	All_TM_vs_all_other_cells
Cstb	3.94e-187	-0.374353	0.588	0.755	7.87e-184	All_TM_vs_all_other_cells
Pim1	9.27e-187	-0.319199	0.258	0.541	1.85e-183	All_TM_vs_all_other_cells
Cst3	3.22e-187	2.1835	0.969	0.915	6.33e-183	TM1_vs_all_other_TM
Col8a2	3.76e-186	1.51353	0.68	0.249	7.38e-182	TM1_vs_all_other_TM
Mxd1	1.07e-184	-0.294223	0.164	0.426	2.13e-181	All_TM_vs_all_other_cells
Avpi1	2.41e-184	-0.391026	0.26	0.542	4.82e-181	All_TM_vs_all_other_cells
Mfap4	1.16e-183	0.651073	0.599	0.5	2.31e-180	All_TM_vs_all_other_cells
Igfbp4	5e-184	1.60611	0.849	0.587	9.83e-180	TM2_vs_other_TM
Svep1	1.53e-183	1.36596	0.391	0.043	3e-179	TM1_vs_all_other_TM
Tsc22d4	1.71e-182	-0.34376	0.496	0.729	3.42e-179	All_TM_vs_all_other_cells
Akr1b3	1.82e-182	-0.27571	0.152	0.446	3.63e-179	All_TM_vs_all_other_cells
Acta2	3.2e-183	-3.41755	0.069	0.55	6.29e-179	TM2_vs_other_TM
Itgbl1	1.21e-181	0.601302	0.428	0.157	2.43e-178	All_TM_vs_all_other_cells
Hbegf	3.31e-179	-0.546476	0.234	0.501	6.61e-176	All_TM_vs_all_other_cells
Penk	4.36e-180	2.43078	0.551	0.152	8.56e-176	TM1_vs_all_other_TM
Akr1b7	5.18e-179	-0.302692	0.122	0.379	1.04e-175	All_TM_vs_all_other_cells
Sytl1	5.6e-179	-0.353533	0.127	0.432	1.12e-175	All_TM_vs_all_other_cells
Tspan6	1.48e-178	0.497531	0.449	0.286	2.96e-175	All_TM_vs_all_other_cells
Idi1	9.43e-178	-0.256804	0.247	0.523	1.89e-174	All_TM_vs_all_other_cells
Svep1	4e-174	0.299278	0.369	0.128	8e-171	All_TM_vs_all_other_cells
Chil1	4.76e-173	2.29874	0.524	0.121	9.35e-169	TM1_vs_all_other_TM
Clu	9.68e-173	-2.2297	0.343	0.736	1.9e-168	TM2_vs_other_TM
Tfap2b	3.18e-172	1.52733	0.635	0.249	6.24e-168	TM3_vs_other_TM
Prelp	5.7e-171	0.590978	0.494	0.357	1.14e-167	All_TM_vs_all_other_cells
Atp2b1	1.07e-170	-0.344987	0.245	0.535	2.13e-167	All_TM_vs_all_other_cells
Ptgr1	1.62e-170	-0.341763	0.147	0.402	3.23e-167	All_TM_vs_all_other_cells
Col1a1	1.8e-169	-2.50581	0.502	0.81	3.53e-165	TM3_vs_other_TM
Efemp1	1.78e-168	-0.295201	0.284	0.57	3.55e-165	All_TM_vs_all_other_cells
Igfbp2	1.98e-168	0.724845	0.614	0.54	3.95e-165	All_TM_vs_all_other_cells
Arpc2	6.12e-168	-0.374287	0.454	0.691	1.22e-164	All_TM_vs_all_other_cells
Colec12	6.46e-168	0.539653	0.502	0.311	1.29e-164	All_TM_vs_all_other_cells
Tuba1c	1.99e-168	1.61955	0.52	0.143	3.9e-164	TM3_vs_other_TM
Tnmd	2.02e-167	2.56036	0.38	0.052	3.97e-163	TM1_vs_all_other_TM
Sqle	3.79e-166	-0.259642	0.204	0.453	7.57e-163	All_TM_vs_all_other_cells
Gm2694	6.4e-166	-0.329493	0.021	0.347	1.28e-162	All_TM_vs_all_other_cells
Mgarp	1.71e-165	-0.5823	0.503	0.627	3.43e-162	All_TM_vs_all_other_cells
Hmgcs1	1.76e-165	-0.313085	0.299	0.559	3.53e-162	All_TM_vs_all_other_cells
Dsg1a	2.48e-165	-0.344616	0.16	0.433	4.96e-162	All_TM_vs_all_other_cells
Gltp	1e-162	-0.317413	0.173	0.438	2.01e-159	All_TM_vs_all_other_cells
Pkp3	1.99e-162	-0.321676	0.149	0.431	3.99e-159	All_TM_vs_all_other_cells
Cxcl12	6.1e-163	1.21375	0.832	0.435	1.2e-158	TM3_vs_other_TM
Mal2	8.98e-162	-0.455266	0.131	0.425	1.8e-158	All_TM_vs_all_other_cells
Col1a2	3.7e-162	-2.17618	0.655	0.862	7.27e-158	TM3_vs_other_TM
Krt4	1.16e-160	-0.374727	0.254	0.476	2.33e-157	All_TM_vs_all_other_cells
Bgn	1.55e-161	-1.38028	0.621	0.868	3.05e-157	TM3_vs_other_TM
Homer2	2.49e-160	-0.307917	0.14	0.394	4.98e-157	All_TM_vs_all_other_cells
Fbln1	5.07e-161	-1.6044	0.248	0.658	9.96e-157	TM3_vs_other_TM
Thbs1	1.02e-159	-2.10692	0.193	0.601	2.01e-155	TM3_vs_other_TM
Htra1	7.68e-158	1.36336	0.569	0.178	1.51e-153	TM1_vs_all_other_TM
Ifitm3	8.35e-157	-1.0129	0.801	0.936	1.64e-152	TM1_vs_all_other_TM
Fndc1	2.94e-155	0.626673	0.482	0.353	5.88e-152	All_TM_vs_all_other_cells
Inmt	2.5e-155	1.60457	0.347	0.042	4.91e-151	TM2_vs_other_TM
Anxa2	3.8e-154	-0.379201	0.505	0.69	7.61e-151	All_TM_vs_all_other_cells
Ppl	7.38e-154	-0.503844	0.238	0.482	1.48e-150	All_TM_vs_all_other_cells
Cpxm1	1.7e-154	1.54375	0.671	0.284	3.33e-150	TM1_vs_all_other_TM
Ccn2	3.95e-153	1.60631	0.837	0.561	7.76e-149	TM2_vs_other_TM
Ncald	4.66e-153	1.36353	0.479	0.124	9.15e-149	TM3_vs_other_TM
Igfbp2	4.72e-153	-3.27103	0.118	0.533	9.26e-149	TM2_vs_other_TM
Matn4	4.03e-151	1.39797	0.267	0.011	7.92e-147	TM1_vs_all_other_TM
Cldn5	5.9e-150	-0.287884	0.132	0.319	1.18e-146	All_TM_vs_all_other_cells
Mdk	1.24e-150	-1.27514	0.625	0.839	2.44e-146	TM1_vs_all_other_TM
Fbln1	5.44e-149	0.486777	0.559	0.454	1.09e-145	All_TM_vs_all_other_cells
Rbp4	7.57e-150	1.88375	0.367	0.056	1.49e-145	TM3_vs_other_TM
Taldo1	2.55e-148	-0.369266	0.396	0.641	5.1e-145	All_TM_vs_all_other_cells
Igfbp6	9.58e-149	1.88539	0.647	0.27	1.88e-144	TM1_vs_all_other_TM
Gk	5.6e-147	-0.273698	0.207	0.439	1.12e-143	All_TM_vs_all_other_cells
Ctnnal1	1.03e-146	1.45588	0.498	0.151	2.01e-142	TM3_vs_other_TM
Thbs2	1.04e-146	1.59332	0.537	0.174	2.04e-142	TM1_vs_all_other_TM
Mgarp	2.05e-146	1.70824	0.681	0.326	4.02e-142	TM1_vs_all_other_TM
Cilp2	3.66e-146	1.34731	0.262	0.012	7.19e-142	TM1_vs_all_other_TM
Slk	7.06e-145	-0.258955	0.261	0.528	1.41e-141	All_TM_vs_all_other_cells
Crym	7.36e-146	1.36013	0.304	0.029	1.45e-141	TM2_vs_other_TM
Tmsb10	2.87e-145	0.911312	0.987	0.968	5.63e-141	TM3_vs_other_TM
Mkrn1	5.96e-144	-0.314101	0.239	0.496	1.19e-140	All_TM_vs_all_other_cells
Gpc3	1.24e-144	1.71118	0.64	0.282	2.43e-140	TM2_vs_other_TM
Rgs10	4.43e-143	-0.468318	0.255	0.48	8.85e-140	All_TM_vs_all_other_cells
Pdgfrl	5.6e-144	-1.65273	0.053	0.429	1.1e-139	TM3_vs_other_TM
Col23a1	5.89e-144	1.29594	0.502	0.152	1.16e-139	TM3_vs_other_TM
Ogn	1.86e-143	1.21274	0.748	0.355	3.66e-139	TM1_vs_all_other_TM
Cd24a	2.6e-142	-0.371947	0.233	0.46	5.19e-139	All_TM_vs_all_other_cells
Hmgcr	5.15e-142	-0.314401	0.314	0.531	1.03e-138	All_TM_vs_all_other_cells
Col16a1	2.71e-142	1.35658	0.575	0.205	5.33e-138	TM1_vs_all_other_TM
Srpx2	4.08e-141	0.443296	0.412	0.183	8.16e-138	All_TM_vs_all_other_cells
Col8a1	1.62e-141	1.45052	0.512	0.154	3.19e-137	TM1_vs_all_other_TM
Cmah	1.08e-139	-0.284473	0.171	0.425	2.15e-136	All_TM_vs_all_other_cells
Actn4	1.9e-139	-0.339149	0.45	0.674	3.8e-136	All_TM_vs_all_other_cells
Chil1	1.84e-139	-3.86811	0.029	0.382	3.61e-135	TM3_vs_other_TM
Gja1	1.91e-138	-0.273601	0.372	0.616	3.82e-135	All_TM_vs_all_other_cells
Clec11a	2.67e-139	1.28565	0.45	0.113	5.24e-135	TM1_vs_all_other_TM
Timp2	3.91e-139	1.08198	0.908	0.743	7.69e-135	TM1_vs_all_other_TM
Gpr137b	1.9e-137	0.471742	0.445	0.331	3.79e-134	All_TM_vs_all_other_cells
Prelp	3e-138	1.63	0.587	0.238	5.89e-134	TM1_vs_all_other_TM
Smagp	1.21e-136	-0.392549	0.132	0.433	2.41e-133	All_TM_vs_all_other_cells
Hk2	1.46e-136	-0.381521	0.489	0.677	2.93e-133	All_TM_vs_all_other_cells
Hopx	7.69e-136	-0.733618	0.205	0.447	1.54e-132	All_TM_vs_all_other_cells
Pcolce	3.86e-136	1.17988	0.873	0.668	7.57e-132	TM1_vs_all_other_TM
Cyba	5.81e-135	0.38701	0.587	0.463	1.16e-131	All_TM_vs_all_other_cells
Dstn	9.25e-136	1.06503	0.882	0.728	1.82e-131	TM3_vs_other_TM
Pik3r1	3.2e-135	1.26535	0.574	0.202	6.29e-131	TM1_vs_all_other_TM
Cox6c	1.57e-134	0.77231	0.962	0.904	3.09e-130	TM3_vs_other_TM
Myoc	1.95e-134	-3.55635	0.074	0.434	3.84e-130	TM3_vs_other_TM
Krt16	4.33e-133	-0.393586	0.183	0.405	8.67e-130	All_TM_vs_all_other_cells
Nostrin	8.12e-134	1.03404	0.269	0.022	1.6e-129	TM2_vs_other_TM
Chad	4.73e-133	2.06356	0.32	0.044	9.29e-129	TM1_vs_all_other_TM
Mustn1	6.28e-132	0.277478	0.362	0.166	1.26e-128	All_TM_vs_all_other_cells
Alpl	8.39e-133	1.25348	0.296	0.033	1.65e-128	TM2_vs_other_TM
Col8a1	1.81e-131	0.50407	0.44	0.292	3.62e-128	All_TM_vs_all_other_cells
Chchd10	2.21e-131	-0.339683	0.285	0.528	4.43e-128	All_TM_vs_all_other_cells
Cpxm2	2.99e-132	1.32443	0.417	0.096	5.87e-128	TM1_vs_all_other_TM
Nr2f1	2.59e-130	-1.51618	0.133	0.526	5.08e-126	TM1_vs_all_other_TM
Rcn3	5.57e-129	0.514139	0.451	0.288	1.11e-125	All_TM_vs_all_other_cells
Cmpk1	1.14e-128	-0.299866	0.298	0.546	2.28e-125	All_TM_vs_all_other_cells
Egfl7	1.15e-128	-0.366892	0.219	0.448	2.3e-125	All_TM_vs_all_other_cells
Ltbp2	1.59e-129	1.37716	0.368	0.07	3.12e-125	TM1_vs_all_other_TM
Tpm2	1.97e-129	1.35905	0.599	0.3	3.86e-125	TM3_vs_other_TM
Myh14	3.82e-128	-0.313368	0.125	0.402	7.65e-125	All_TM_vs_all_other_cells
Myl6	4.38e-129	-1.21651	0.873	0.957	8.61e-125	TM2_vs_other_TM
Fbln5	9.27e-128	1.25563	0.612	0.265	1.82e-123	TM1_vs_all_other_TM
Dnajb1	5.33e-126	-0.369597	0.447	0.65	1.07e-122	All_TM_vs_all_other_cells
Lum	7.01e-127	1.41418	0.854	0.606	1.38e-122	TM1_vs_all_other_TM
Pdgfrl	4.52e-126	1.37307	0.519	0.18	8.87e-122	TM1_vs_all_other_TM
Reck	1.08e-124	0.433278	0.415	0.23	2.15e-121	All_TM_vs_all_other_cells
Rel	5.36e-123	-0.307048	0.255	0.473	1.07e-119	All_TM_vs_all_other_cells
Sfrp2	1.91e-122	0.449112	0.369	0.194	3.82e-119	All_TM_vs_all_other_cells
Fmod	2.61e-123	-2.40126	0.108	0.483	5.12e-119	TM2_vs_other_TM
Nudt4	2.78e-122	-0.26169	0.31	0.585	5.55e-119	All_TM_vs_all_other_cells
Cxcl14	1.16e-121	1.00661	0.202	0.004	2.29e-117	TM1_vs_all_other_TM
Cpxm1	2.26e-121	-1.57373	0.183	0.542	4.44e-117	TM3_vs_other_TM
Svip	2.34e-120	-0.259258	0.239	0.46	4.68e-117	All_TM_vs_all_other_cells
Stk17b	3.38e-121	1.06041	0.372	0.078	6.65e-117	TM1_vs_all_other_TM
Cyp2f2	5.64e-121	1.66695	0.285	0.035	1.11e-116	TM1_vs_all_other_TM
Fam25c	6.06e-120	-0.327679	0.103	0.353	1.21e-116	All_TM_vs_all_other_cells
Efemp1	4.22e-120	1.24859	0.418	0.109	8.28e-116	TM2_vs_other_TM
Rgs5	6.48e-118	1.86402	0.249	0.024	1.27e-113	TM2_vs_other_TM
Nucb2	1.41e-117	1.04084	0.501	0.164	2.76e-113	TM1_vs_all_other_TM
Cfh	2.01e-117	-1.58535	0.064	0.397	3.95e-113	TM3_vs_other_TM
Cyp26b1	5.58e-117	1.36811	0.251	0.024	1.1e-112	TM1_vs_all_other_TM
Mt1	8.45e-116	-0.287734	0.769	0.881	1.69e-112	All_TM_vs_all_other_cells
Rasl11a	1.32e-115	0.565997	0.414	0.272	2.65e-112	All_TM_vs_all_other_cells
Ifitm1	3.35e-116	-1.41215	0.211	0.568	6.59e-112	TM1_vs_all_other_TM
Cyp4a12b	1.03e-114	-0.272686	0.027	0.318	2.06e-111	All_TM_vs_all_other_cells
Col6a1	6.04e-115	1.26744	0.593	0.267	1.19e-110	TM1_vs_all_other_TM
Col8a1	2.12e-114	-1.48615	0.065	0.39	4.16e-110	TM3_vs_other_TM
Hspb1	8.75e-114	0.952626	0.846	0.606	1.72e-109	TM3_vs_other_TM
Ccdc80	2.18e-113	-1.3052	0.22	0.567	4.28e-109	TM3_vs_other_TM
Krt17	2.22e-112	-0.26494	0.164	0.385	4.44e-109	All_TM_vs_all_other_cells
Adrb2	3.63e-112	-0.294492	0.2	0.422	7.25e-109	All_TM_vs_all_other_cells
Col6a3	4.7e-113	-1.44756	0.037	0.347	9.24e-109	TM3_vs_other_TM
Edn3	6.91e-113	-1.63657	0.171	0.508	1.36e-108	TM1_vs_all_other_TM
Fst	2e-112	0.959123	0.236	0.02	3.92e-108	TM1_vs_all_other_TM
Clic3	2.27e-110	-0.443083	0.141	0.393	4.54e-107	All_TM_vs_all_other_cells
Slc5a3	2.49e-110	0.478265	0.439	0.342	4.97e-107	All_TM_vs_all_other_cells
Spink7	5.59e-110	-0.276612	0.05	0.314	1.12e-106	All_TM_vs_all_other_cells
Thbs2	7.71e-110	0.475887	0.409	0.244	1.54e-106	All_TM_vs_all_other_cells
Bpifb1	9.43e-111	1.3723	0.205	0.01	1.85e-106	TM1_vs_all_other_TM
Lypd3	2.84e-109	-0.379419	0.161	0.409	5.69e-106	All_TM_vs_all_other_cells
Cfh	3.62e-110	1.28295	0.5	0.176	7.11e-106	TM2_vs_other_TM
Ooep	4.34e-110	1.13555	0.194	0.007	8.53e-106	TM1_vs_all_other_TM
Csta1	9.14e-109	-0.459995	0.188	0.412	1.83e-105	All_TM_vs_all_other_cells
Sparc	1.45e-109	-2.0244	0.758	0.874	2.85e-105	TM3_vs_other_TM
Col16a1	8.74e-108	0.492001	0.429	0.31	1.75e-104	All_TM_vs_all_other_cells
Nid1	3.3e-107	0.46194	0.438	0.328	6.6e-104	All_TM_vs_all_other_cells
Gm525	3.14e-107	0.986861	0.172	0.001	6.17e-103	TM1_vs_all_other_TM
Mylk	8.26e-107	1.04473	0.689	0.438	1.62e-102	TM3_vs_other_TM
Atp1b1	4.47e-106	1.14578	0.224	0.02	8.79e-102	TM1_vs_all_other_TM
Hmgb2	1.08e-104	-0.286854	0.253	0.495	2.16e-101	All_TM_vs_all_other_cells
Tgfb3	1.9e-105	1.01374	0.503	0.183	3.73e-101	TM1_vs_all_other_TM
Aebp1	3.08e-105	-1.28282	0.339	0.648	6.05e-101	TM3_vs_other_TM
Mmp3	3.91e-105	2.98742	0.2	0.012	7.68e-101	TM1_vs_all_other_TM
Rasd1	8.45e-105	1.53256	0.428	0.142	1.66e-100	TM3_vs_other_TM
Fmod	1.27e-104	-2.48502	0.178	0.477	2.5e-100	TM3_vs_other_TM
Crispld2	1.73e-104	1.18082	0.69	0.39	3.4e-100	TM2_vs_other_TM
Ccdc80	2.8e-104	1.00429	0.669	0.328	5.5e-100	TM1_vs_all_other_TM
Egfl6	4.2e-104	0.756574	0.168	0.002	8.25e-100	TM1_vs_all_other_TM
Clu	4.61e-103	0.41354	0.742	0.779	9.22e-100	All_TM_vs_all_other_cells
Hspb1	2.46e-103	-1.0968	0.484	0.787	4.84e-99	TM2_vs_other_TM
Fndc1	5.74e-103	1.19038	0.575	0.25	1.13e-98	TM1_vs_all_other_TM
Ceacam1	2.37e-101	-0.253679	0.15	0.347	4.74e-98	All_TM_vs_all_other_cells
Map1lc3a	2.8e-101	0.913518	0.77	0.551	5.5e-97	TM3_vs_other_TM
Sfrp1	3.23e-101	1.04858	0.313	0.063	6.34e-97	TM1_vs_all_other_TM
Comp	6.26e-101	1.55084	0.255	0.036	1.23e-96	TM1_vs_all_other_TM
Crip1	5.89e-100	-1.33865	0.226	0.551	1.16e-95	TM3_vs_other_TM
Pdgfra	8.22e-99	0.431205	0.466	0.315	1.64e-95	All_TM_vs_all_other_cells
Eea1	1.45e-99	1.12192	0.606	0.343	2.84e-95	TM3_vs_other_TM
Islr	3.1e-98	0.528172	0.534	0.478	6.19e-95	All_TM_vs_all_other_cells
Prss12	4.88e-99	0.79535	0.256	0.036	9.58e-95	TM1_vs_all_other_TM
Omd	5.1e-99	1.12652	0.328	0.075	1e-94	TM1_vs_all_other_TM
Cygb	6.52e-99	-1.62063	0.137	0.45	1.28e-94	TM1_vs_all_other_TM
Flna	7.19e-99	1.13482	0.54	0.263	1.41e-94	TM3_vs_other_TM
Cpz	1.68e-98	0.759262	0.193	0.012	3.31e-94	TM1_vs_all_other_TM
Ltbp4	2.62e-98	-1.13314	0.243	0.577	5.14e-94	TM3_vs_other_TM
Lum	3.35e-98	-1.39921	0.556	0.762	6.58e-94	TM3_vs_other_TM
Igfbp6	9.03e-98	-2.24163	0.208	0.5	1.77e-93	TM3_vs_other_TM
Ptx4	2.47e-97	0.699213	0.164	0.003	4.84e-93	TM1_vs_all_other_TM
Itm2b	3.98e-97	-0.559387	0.967	0.981	7.81e-93	TM3_vs_other_TM
Junb	5.01e-97	-0.756607	0.954	0.964	9.84e-93	TM1_vs_all_other_TM
Lamc3	5.02e-97	0.96854	0.269	0.045	9.87e-93	TM2_vs_other_TM
H3f3b	7.47e-97	-0.681434	0.935	0.953	1.47e-92	TM1_vs_all_other_TM
Tnmd	1.24e-95	0.482793	0.399	0.263	2.49e-92	All_TM_vs_all_other_cells
Fbln5	2.3e-95	0.504237	0.473	0.382	4.61e-92	All_TM_vs_all_other_cells
Spp1	5.53e-95	0.618063	0.441	0.346	1.11e-91	All_TM_vs_all_other_cells
Guca1a	2.13e-94	-0.368743	0.252	0.446	4.26e-91	All_TM_vs_all_other_cells
Krt13	2.17e-94	-0.55564	0.174	0.391	4.34e-91	All_TM_vs_all_other_cells
Myl9	4.73e-95	-1.67721	0.264	0.557	9.3e-91	TM2_vs_other_TM
Ckb	1.41e-94	1.23286	0.615	0.37	2.77e-90	TM3_vs_other_TM
Ecrg4	4.92e-94	-2.96431	0.216	0.497	9.66e-90	TM3_vs_other_TM
Fgl2	9.07e-94	1.2008	0.469	0.175	1.78e-89	TM2_vs_other_TM
Ly6a	1.17e-92	-0.327295	0.25	0.458	2.34e-89	All_TM_vs_all_other_cells
Itgbl1	1.67e-93	-1.43486	0.158	0.454	3.29e-89	TM3_vs_other_TM
Col12a1	1.79e-93	-1.67546	0.206	0.524	3.51e-89	TM2_vs_other_TM
Col12a1	1.8e-93	-1.89125	0.251	0.527	3.53e-89	TM3_vs_other_TM
Dbi	8.12e-93	0.813967	0.869	0.695	1.59e-88	TM3_vs_other_TM
Thbs4	8.94e-93	1.69309	0.277	0.053	1.76e-88	TM1_vs_all_other_TM
Igfbp5	1.25e-92	-1.37892	0.799	0.865	2.46e-88	TM3_vs_other_TM
Gem	1.23e-91	0.40385	0.471	0.378	2.47e-88	All_TM_vs_all_other_cells
Ramp2	1.88e-92	-1.30362	0.081	0.378	3.69e-88	TM1_vs_all_other_TM
Pof1b	2.83e-91	-0.331287	0.123	0.373	5.66e-88	All_TM_vs_all_other_cells
Mgll	3.16e-91	-0.33677	0.352	0.542	6.32e-88	All_TM_vs_all_other_cells
Apod	5.63e-92	-1.7348	0.48	0.697	1.11e-87	TM3_vs_other_TM
Nrp2	7.88e-92	0.972666	0.679	0.428	1.55e-87	TM3_vs_other_TM
Fkbp9	1.97e-91	1.00847	0.539	0.241	3.86e-87	TM1_vs_all_other_TM
Fstl1	3.31e-90	0.461706	0.546	0.494	6.62e-87	All_TM_vs_all_other_cells
Tubb4b	3.83e-90	-0.259626	0.351	0.576	7.67e-87	All_TM_vs_all_other_cells
Tmem100	1.31e-90	-1.4308	0.106	0.394	2.57e-86	TM3_vs_other_TM
Tpm1	1.43e-90	1.01376	0.748	0.507	2.8e-86	TM3_vs_other_TM
Fzd1	2.03e-90	0.959823	0.385	0.116	3.98e-86	TM1_vs_all_other_TM
Ndufa4	1.62e-89	0.693857	0.92	0.824	3.17e-85	TM3_vs_other_TM
Krt6a	7.14e-88	-0.720096	0.253	0.448	1.43e-84	All_TM_vs_all_other_cells
Rasd1	2.08e-87	0.399281	0.382	0.286	4.15e-84	All_TM_vs_all_other_cells
Ogfrl1	2.44e-87	0.514444	0.515	0.434	4.87e-84	All_TM_vs_all_other_cells
Muc4	3.47e-87	-0.338461	0.186	0.39	6.93e-84	All_TM_vs_all_other_cells
Nr2f1	6.23e-88	0.943408	0.585	0.289	1.22e-83	TM3_vs_other_TM
Col8a2	7.01e-88	-1.28589	0.175	0.485	1.38e-83	TM2_vs_other_TM
Mmp2	7.91e-88	1.07921	0.432	0.154	1.55e-83	TM1_vs_all_other_TM
Ecrg4	1.18e-87	-2.62557	0.182	0.488	2.31e-83	TM2_vs_other_TM
Areg	1.6e-86	-0.321875	0.171	0.393	3.2e-83	All_TM_vs_all_other_cells
Rbp1	3.61e-87	-0.917889	0.732	0.864	7.08e-83	TM3_vs_other_TM
Adora1	3.99e-87	0.712168	0.208	0.024	7.84e-83	TM1_vs_all_other_TM
Mgp	4.83e-87	0.833967	0.98	0.899	9.48e-83	TM1_vs_all_other_TM
Pcp4l1	5.31e-87	0.834474	0.2	0.021	1.04e-82	TM3_vs_other_TM
Malat1	9.31e-87	0.486564	1	0.993	1.83e-82	TM3_vs_other_TM
Hs3st3a1	1.81e-86	0.982701	0.506	0.235	3.56e-82	TM3_vs_other_TM
Wif1	2.48e-86	0.709617	0.161	0.008	4.87e-82	TM1_vs_all_other_TM
Ccn1	2.9e-86	-1.64342	0.236	0.517	5.7e-82	TM3_vs_other_TM
Bsg	2.95e-86	0.848487	0.86	0.671	5.79e-82	TM1_vs_all_other_TM
Cdkn1a	3.34e-85	-0.257062	0.31	0.534	6.68e-82	All_TM_vs_all_other_cells
Mall	5.08e-85	-0.298841	0.116	0.376	1.02e-81	All_TM_vs_all_other_cells
Gm26771	1e-85	0.947014	0.184	0.016	1.97e-81	TM1_vs_all_other_TM
AI661453	3.42e-84	-0.372197	0.142	0.374	6.83e-81	All_TM_vs_all_other_cells
Pcdh7	3.35e-84	0.990013	0.381	0.13	6.57e-80	TM3_vs_other_TM
Ecm1	4.13e-84	-1.43592	0.243	0.523	8.12e-80	TM1_vs_all_other_TM
Cryab	4.64e-84	-1.24114	0.316	0.62	9.11e-80	TM2_vs_other_TM
Ltbp1	4.76e-84	1.10137	0.36	0.121	9.34e-80	TM3_vs_other_TM
Aox3	4.76e-83	0.291352	0.387	0.275	9.51e-80	All_TM_vs_all_other_cells
Krt6b	1.41e-82	-0.592066	0.181	0.385	2.81e-79	All_TM_vs_all_other_cells
Rps28	1.72e-83	-0.460184	0.979	0.988	3.37e-79	TM3_vs_other_TM
Cdh2	2.38e-83	0.741848	0.193	0.021	4.68e-79	TM1_vs_all_other_TM
Nefm	5.45e-83	1.11011	0.164	0.011	1.07e-78	TM1_vs_all_other_TM
Adamtsl3	7.79e-82	0.256507	0.315	0.148	1.56e-78	All_TM_vs_all_other_cells
Rorb	9.98e-83	0.891115	0.202	0.024	1.96e-78	TM3_vs_other_TM
Srpx2	1.17e-82	0.901864	0.456	0.171	2.3e-78	TM1_vs_all_other_TM
Ppia	5.55e-82	0.429869	0.985	0.973	1.09e-77	TM3_vs_other_TM
Folr1	6.34e-81	-0.285454	0.275	0.462	1.27e-77	All_TM_vs_all_other_cells
Ace	7.18e-82	0.595139	0.161	0.01	1.41e-77	TM1_vs_all_other_TM
Fn1	1.14e-81	-1.64201	0.115	0.382	2.24e-77	TM3_vs_other_TM
Rgs16	1.39e-81	1.24952	0.403	0.152	2.73e-77	TM3_vs_other_TM
Tgfb3	3.77e-80	0.45449	0.368	0.207	7.55e-77	All_TM_vs_all_other_cells
Pglyrp1	1.04e-79	-0.577021	0.208	0.413	2.08e-76	All_TM_vs_all_other_cells
Ccn5	2.19e-80	0.901942	0.191	0.022	4.31e-76	TM1_vs_all_other_TM
Fn1	2.25e-80	-1.57704	0.086	0.372	4.42e-76	TM2_vs_other_TM
Pgf	2.45e-80	-1.49054	0.036	0.288	4.82e-76	TM1_vs_all_other_TM
Rps20	2.98e-80	-0.43048	0.988	0.988	5.84e-76	TM3_vs_other_TM
Asprv1	3.96e-79	-0.505102	0.127	0.344	7.92e-76	All_TM_vs_all_other_cells
Ctsh	4.97e-80	-1.06083	0.187	0.469	9.77e-76	TM3_vs_other_TM
Col6a1	9.85e-80	-1.15208	0.194	0.477	1.93e-75	TM3_vs_other_TM
Sncaip	1.49e-79	0.957217	0.325	0.098	2.94e-75	TM3_vs_other_TM
Nrp2	1.81e-79	-1.08176	0.353	0.601	3.55e-75	TM1_vs_all_other_TM
Htra1	2.41e-79	-1.18032	0.108	0.394	4.74e-75	TM2_vs_other_TM
H3f3a	3.21e-79	0.59087	0.913	0.842	6.3e-75	TM3_vs_other_TM
Ptn	3.26e-78	0.331769	0.588	0.515	6.53e-75	All_TM_vs_all_other_cells
Clec11a	3.84e-78	0.361936	0.319	0.204	7.67e-75	All_TM_vs_all_other_cells
Wnt5a	4.68e-79	1.01459	0.484	0.21	9.2e-75	TM2_vs_other_TM
Nid1	7.56e-79	1.35544	0.44	0.209	1.49e-74	TM3_vs_other_TM
Pde5a	8.67e-79	-1.16418	0.083	0.35	1.7e-74	TM1_vs_all_other_TM
Gpr137b	9.43e-79	-1.61183	0.051	0.302	1.85e-74	TM1_vs_all_other_TM
Fmo1	3.2e-78	-0.986025	0.126	0.409	6.28e-74	TM3_vs_other_TM
Col5a2	3.62e-77	0.317218	0.409	0.278	7.23e-74	All_TM_vs_all_other_cells
Pdgfra	3.7e-78	1.15797	0.55	0.279	7.26e-74	TM2_vs_other_TM
Col6a1	5.57e-77	0.483623	0.443	0.332	1.11e-73	All_TM_vs_all_other_cells
Fndc1	5.8e-78	-1.24291	0.181	0.457	1.14e-73	TM3_vs_other_TM
Igfbp7	8.23e-78	0.541811	0.977	0.96	1.62e-73	TM2_vs_other_TM
C2cd4b	8.83e-77	-0.26909	0.074	0.318	1.77e-73	All_TM_vs_all_other_cells
Timp2	2.7e-77	-0.908455	0.714	0.845	5.31e-73	TM3_vs_other_TM
2410006H16Rik	3.52e-77	-0.871236	0.542	0.783	6.91e-73	TM3_vs_other_TM
Rtn1	8.74e-77	0.923617	0.37	0.133	1.72e-72	TM3_vs_other_TM
Mfap5	9.44e-77	1.18668	0.4	0.157	1.85e-72	TM2_vs_other_TM
Ccl11	1.09e-76	1.52274	0.132	0.004	2.13e-72	TM2_vs_other_TM
Loxl1	1.18e-76	0.867818	0.636	0.35	2.31e-72	TM1_vs_all_other_TM
Cd302	1.27e-76	-0.824891	0.51	0.743	2.49e-72	TM3_vs_other_TM
Ctsh	1.28e-76	0.917528	0.548	0.277	2.52e-72	TM1_vs_all_other_TM
Ecm2	1.42e-76	0.802701	0.291	0.074	2.78e-72	TM1_vs_all_other_TM
Akap12	1.51e-76	1.04491	0.389	0.145	2.97e-72	TM2_vs_other_TM
Isg15	3.15e-76	-1.52571	0.096	0.364	6.19e-72	TM1_vs_all_other_TM
Cldn10	4.54e-76	-2.10325	0.036	0.262	8.91e-72	TM3_vs_other_TM
Il33	6.21e-76	0.810124	0.139	0.007	1.22e-71	TM2_vs_other_TM
Svep1	7.29e-76	-1.02418	0.019	0.236	1.43e-71	TM3_vs_other_TM
Tmem255b	8.1e-76	0.454061	0.129	0.003	1.59e-71	TM1_vs_all_other_TM
Ntn1	9.43e-76	0.856467	0.25	0.054	1.85e-71	TM2_vs_other_TM
Pou3f3	1.01e-75	0.567971	0.139	0.006	1.99e-71	TM1_vs_all_other_TM
Fbln1	1.06e-75	0.944633	0.697	0.416	2.09e-71	TM1_vs_all_other_TM
Ptprd	1.19e-75	1.02187	0.48	0.239	2.34e-71	TM3_vs_other_TM
Lgi2	1.33e-75	0.839867	0.286	0.074	2.62e-71	TM2_vs_other_TM
Srpx2	1.59e-75	-1.18715	0.077	0.347	3.13e-71	TM2_vs_other_TM
Aqp1	1.65e-74	0.401224	0.489	0.42	3.3e-71	All_TM_vs_all_other_cells
Phlda1	2.19e-75	1.18637	0.471	0.217	4.31e-71	TM2_vs_other_TM
Col5a2	2.26e-75	0.911906	0.46	0.192	4.43e-71	TM1_vs_all_other_TM
Steap3	2.96e-75	0.747013	0.287	0.073	5.81e-71	TM1_vs_all_other_TM
Lmx1b	4.68e-75	0.947679	0.387	0.152	9.18e-71	TM3_vs_other_TM
S100a6	6.31e-75	0.679648	0.992	0.983	1.24e-70	TM1_vs_all_other_TM
Mustn1	1.84e-74	0.960076	0.289	0.082	3.62e-70	TM3_vs_other_TM
Car3	3.58e-74	1.362	0.146	0.009	7.04e-70	TM1_vs_all_other_TM
Tmem100	5.53e-73	0.485334	0.406	0.256	1.11e-69	All_TM_vs_all_other_cells
Emp1	7.29e-74	-0.978554	0.29	0.569	1.43e-69	TM3_vs_other_TM
Cox8a	9.91e-74	0.481892	0.967	0.938	1.95e-69	TM3_vs_other_TM
Postn	1.13e-73	1.2868	0.443	0.194	2.22e-69	TM1_vs_all_other_TM
Plpp3	1.43e-73	-0.978498	0.636	0.814	2.81e-69	TM2_vs_other_TM
Ly6a	1.95e-73	0.858049	0.186	0.025	3.82e-69	TM2_vs_other_TM
Col6a2	3.28e-73	0.854392	0.415	0.16	6.44e-69	TM1_vs_all_other_TM
Rplp1	5.66e-73	-0.575856	0.857	0.924	1.11e-68	TM3_vs_other_TM
Rasd1	9.14e-73	-1.57729	0.078	0.329	1.79e-68	TM1_vs_all_other_TM
Twist1	1.88e-71	0.430826	0.373	0.183	3.76e-68	All_TM_vs_all_other_cells
Gpc4	3.19e-72	0.651992	0.212	0.037	6.27e-68	TM1_vs_all_other_TM
Hs3st3a1	4.72e-72	-1.04683	0.155	0.421	9.27e-68	TM1_vs_all_other_TM
Olfml3	5.38e-72	0.989276	0.43	0.18	1.06e-67	TM1_vs_all_other_TM
Tgfb3	5.65e-72	-0.980318	0.123	0.383	1.11e-67	TM3_vs_other_TM
Tspan6	7.96e-72	-1.29503	0.125	0.398	1.56e-67	TM2_vs_other_TM
Cryab	1.22e-71	0.794423	0.671	0.443	2.4e-67	TM3_vs_other_TM
Nr4a2	1.51e-70	0.295616	0.394	0.312	3.02e-67	All_TM_vs_all_other_cells
Thbs4	2.84e-71	-1.92529	0.004	0.197	5.58e-67	TM3_vs_other_TM
Angpt1	2.86e-70	0.426028	0.343	0.18	5.72e-67	All_TM_vs_all_other_cells
2410006H16Rik	3.2e-71	0.786288	0.822	0.639	6.28e-67	TM2_vs_other_TM
Emb	4.02e-71	-1.21347	0.155	0.433	7.9e-67	TM2_vs_other_TM
Ndufa4	5.55e-71	-0.695066	0.812	0.882	1.09e-66	TM1_vs_all_other_TM
Angptl7	1.16e-70	1.06097	0.125	0.004	2.27e-66	TM1_vs_all_other_TM
Hk2	2.53e-70	-1.5045	0.113	0.369	4.97e-66	TM3_vs_other_TM
Igf2	2.99e-69	0.396098	0.36	0.255	5.98e-66	All_TM_vs_all_other_cells
Ptgis	3.43e-70	-0.912659	0.182	0.466	6.74e-66	TM2_vs_other_TM
Gpha2	9.7e-70	-2.82096	0.017	0.217	1.91e-65	TM3_vs_other_TM
Ctsk	1.31e-69	0.921824	0.599	0.334	2.57e-65	TM1_vs_all_other_TM
Alcam	1.97e-69	0.65793	0.205	0.036	3.86e-65	TM1_vs_all_other_TM
Penk	2.49e-69	-1.87193	0.102	0.362	4.89e-65	TM2_vs_other_TM
Wnt5a	5.29e-68	0.335768	0.39	0.293	1.06e-64	All_TM_vs_all_other_cells
Igfbp4	6.81e-69	-1.13617	0.555	0.732	1.34e-64	TM3_vs_other_TM
Nr2f2	6.88e-69	-1.02462	0.093	0.345	1.35e-64	TM1_vs_all_other_TM
Tspan11	1.31e-68	0.61563	0.172	0.023	2.57e-64	TM2_vs_other_TM
Aldh1a2	3.77e-68	0.859838	0.297	0.089	7.41e-64	TM2_vs_other_TM
Nr2f1	4.6e-67	0.52813	0.488	0.428	9.19e-64	All_TM_vs_all_other_cells
Chad	4.74e-68	-1.874	0.012	0.204	9.32e-64	TM3_vs_other_TM
Tmsb10	5.44e-68	-0.730128	0.967	0.978	1.07e-63	TM1_vs_all_other_TM
Cxcl1	6.17e-68	1.29359	0.457	0.211	1.21e-63	TM2_vs_other_TM
Csrp2	1.02e-66	0.297571	0.473	0.392	2.04e-63	All_TM_vs_all_other_cells
Cst3	1.37e-67	-1.7202	0.914	0.944	2.7e-63	TM3_vs_other_TM
Dmpk	3.24e-67	0.823375	0.275	0.08	6.37e-63	TM3_vs_other_TM
Ramp2	4.46e-67	0.85895	0.461	0.201	8.77e-63	TM2_vs_other_TM
Cldn10	1.05e-66	-2.02045	0.025	0.248	2.07e-62	TM2_vs_other_TM
Tmprss11d	1.16e-65	-0.36244	0.117	0.366	2.33e-62	All_TM_vs_all_other_cells
Pi16	1.54e-66	0.958689	0.273	0.075	3.03e-62	TM2_vs_other_TM
Pdgfrl	1.55e-65	0.472871	0.361	0.187	3.1e-62	All_TM_vs_all_other_cells
Sparc	2.8e-66	-1.53484	0.771	0.859	5.49e-62	TM2_vs_other_TM
Cyp26a1	5.28e-66	1.1064	0.242	0.06	1.04e-61	TM2_vs_other_TM
Gpc3	5.45e-66	-1.33022	0.236	0.481	1.07e-61	TM3_vs_other_TM
Tmed3	6.01e-66	0.796488	0.521	0.27	1.18e-61	TM1_vs_all_other_TM
Pantr1	7.36e-66	0.52291	0.131	0.008	1.45e-61	TM1_vs_all_other_TM
Ncald	7.54e-66	-1.10579	0.093	0.332	1.48e-61	TM1_vs_all_other_TM
Htra1	8.92e-65	0.329574	0.412	0.332	1.78e-61	All_TM_vs_all_other_cells
1500009L16Rik	1.51e-65	-0.936025	0.017	0.223	2.96e-61	TM1_vs_all_other_TM
Slit3	2.33e-65	0.75603	0.282	0.081	4.57e-61	TM1_vs_all_other_TM
Tpm1	2.55e-65	-0.98317	0.428	0.67	5.01e-61	TM2_vs_other_TM
Gpm6b	2.8e-65	0.658008	0.263	0.069	5.5e-61	TM1_vs_all_other_TM
Hmcn1	3.25e-65	-0.750598	0.301	0.587	6.38e-61	TM3_vs_other_TM
Cacna2d1	7.29e-65	0.948245	0.357	0.144	1.43e-60	TM3_vs_other_TM
Nefl	8.44e-65	0.679671	0.102	0	1.66e-60	TM1_vs_all_other_TM
Rplp0	1.76e-64	-0.593261	0.836	0.913	3.45e-60	TM3_vs_other_TM
C4b	3.97e-63	0.36211	0.399	0.276	7.94e-60	All_TM_vs_all_other_cells
Tent5a	4.9e-64	0.760847	0.387	0.15	9.62e-60	TM1_vs_all_other_TM
Flt1	5.95e-64	0.640556	0.139	0.011	1.17e-59	TM3_vs_other_TM
Timp3	6.44e-64	0.947494	0.823	0.715	1.26e-59	TM2_vs_other_TM
Colec12	7.61e-64	0.960106	0.623	0.403	1.5e-59	TM2_vs_other_TM
Hlf	7.8e-64	0.674259	0.186	0.032	1.53e-59	TM2_vs_other_TM
Fuca1	8.77e-64	0.738498	0.544	0.287	1.72e-59	TM1_vs_all_other_TM
P2ry14	9.88e-64	0.625302	0.208	0.042	1.94e-59	TM2_vs_other_TM
Hk2	1.32e-63	1.567	0.433	0.205	2.6e-59	TM2_vs_other_TM
Wnt6	2.14e-63	-1.12813	0.033	0.243	4.21e-59	TM1_vs_all_other_TM
Emb	2.33e-62	0.467373	0.46	0.417	4.65e-59	All_TM_vs_all_other_cells
Cyp2f2	4.39e-63	-1.44039	0.006	0.181	8.62e-59	TM3_vs_other_TM
Col5a1	7.7e-62	0.277646	0.374	0.275	1.54e-58	All_TM_vs_all_other_cells
Itm2a	1.91e-62	0.905456	0.563	0.319	3.75e-58	TM1_vs_all_other_TM
Serping1	2.59e-62	0.759947	0.815	0.642	5.09e-58	TM1_vs_all_other_TM
B3gat2	5.56e-62	0.546698	0.115	0.004	1.09e-57	TM3_vs_other_TM
Gas5	9.51e-62	-0.753225	0.54	0.747	1.87e-57	TM3_vs_other_TM
Olfml3	1.08e-61	-0.983091	0.115	0.347	2.13e-57	TM3_vs_other_TM
Jun	1.77e-61	0.592476	0.939	0.936	3.47e-57	TM2_vs_other_TM
Gsn	1.89e-61	-0.840118	0.592	0.777	3.72e-57	TM3_vs_other_TM
Selenop	2.75e-61	0.911859	0.557	0.327	5.4e-57	TM2_vs_other_TM
Mylk	5.52e-61	-0.885401	0.36	0.605	1.08e-56	TM2_vs_other_TM
Prelp	6.8e-61	-1.23404	0.202	0.439	1.34e-56	TM3_vs_other_TM
Pcolce2	7.85e-61	0.701509	0.117	0.006	1.54e-56	TM1_vs_all_other_TM
Ptma	1.16e-60	0.389459	0.987	0.963	2.28e-56	TM3_vs_other_TM
Mfap4	1.22e-60	0.831347	0.697	0.452	2.39e-56	TM1_vs_all_other_TM
Nuak1	1.94e-60	0.512549	0.178	0.03	3.82e-56	TM1_vs_all_other_TM
Mrps6	2.13e-60	0.671941	0.707	0.5	4.18e-56	TM3_vs_other_TM
Isg15	2.45e-60	1.07854	0.441	0.203	4.81e-56	TM2_vs_other_TM
Aldh3a1	4.1e-60	0.840749	0.422	0.193	8.06e-56	TM1_vs_all_other_TM
Inmt	5.27e-60	-1.23604	0.01	0.196	1.03e-55	TM1_vs_all_other_TM
Cpe	7.29e-60	0.851553	0.53	0.32	1.43e-55	TM3_vs_other_TM
Gas1	8.14e-60	0.942882	0.621	0.377	1.6e-55	TM1_vs_all_other_TM
Nkain3	1.85e-59	0.547719	0.123	0.008	3.63e-55	TM3_vs_other_TM
Rps27a	2.51e-59	-0.339541	0.983	0.98	4.93e-55	TM3_vs_other_TM
Cd9	2.7e-59	-0.814628	0.454	0.679	5.31e-55	TM3_vs_other_TM
Dsc3	3.04e-59	0.690623	0.156	0.022	5.97e-55	TM3_vs_other_TM
Col14a1	3.2e-59	-1.06095	0.005	0.169	6.28e-55	TM3_vs_other_TM
P3h3	4.67e-59	0.74104	0.456	0.218	9.17e-55	TM1_vs_all_other_TM
Fzd1	4.96e-59	-0.869229	0.069	0.282	9.73e-55	TM3_vs_other_TM
Wnt6	5.17e-59	-1.08579	0.03	0.238	1.01e-54	TM2_vs_other_TM
Ltbp3	5.31e-59	0.73747	0.55	0.293	1.04e-54	TM1_vs_all_other_TM
Prrx1	5.61e-59	0.642333	0.573	0.311	1.1e-54	TM1_vs_all_other_TM
Lypd1	1.94e-58	-1.1917	0.006	0.184	3.8e-54	TM1_vs_all_other_TM
Fn1	2.02e-57	0.370374	0.479	0.421	4.03e-54	All_TM_vs_all_other_cells
Cebpb	4.14e-58	-1.03441	0.358	0.572	8.13e-54	TM1_vs_all_other_TM
Ecm1	5.39e-58	0.73456	0.576	0.348	1.06e-53	TM3_vs_other_TM
Map1lc3a	7.27e-58	-0.820114	0.526	0.683	1.43e-53	TM1_vs_all_other_TM
Sfrp2	1.08e-57	-2.1763	0.035	0.217	2.13e-53	TM3_vs_other_TM
Ctnnal1	1.41e-57	-1.12768	0.128	0.351	2.78e-53	TM1_vs_all_other_TM
Abcb1a	2.04e-57	0.67144	0.186	0.037	4e-53	TM3_vs_other_TM
Ece1	3.18e-57	0.810423	0.369	0.156	6.25e-53	TM2_vs_other_TM
Gpr137b	3.35e-57	-1.42061	0.071	0.286	6.59e-53	TM2_vs_other_TM
Pde5a	3.37e-57	0.864484	0.396	0.185	6.63e-53	TM3_vs_other_TM
Edn3	3.93e-56	0.461583	0.422	0.319	7.86e-53	All_TM_vs_all_other_cells
Cd200	4.46e-57	-0.925197	0.117	0.344	8.75e-53	TM3_vs_other_TM
Ltbp4	5.01e-57	0.826235	0.611	0.385	9.85e-53	TM2_vs_other_TM
Gas6	6.38e-57	-1.12311	0.432	0.628	1.25e-52	TM3_vs_other_TM
Ccn2	6.69e-57	-1.1317	0.532	0.712	1.31e-52	TM3_vs_other_TM
Col23a1	6.96e-57	-1.02831	0.128	0.354	1.37e-52	TM1_vs_all_other_TM
Adamtsl3	7.14e-57	0.569805	0.263	0.078	1.4e-52	TM1_vs_all_other_TM
Ctsf	7.16e-57	0.658636	0.326	0.12	1.41e-52	TM1_vs_all_other_TM
Rbp4	7.67e-57	-1.45608	0.037	0.234	1.51e-52	TM1_vs_all_other_TM
Sptbn1	9.78e-57	0.803673	0.72	0.565	1.92e-52	TM2_vs_other_TM
Hs6st2	3.98e-56	0.377863	0.108	0.006	7.82e-52	TM1_vs_all_other_TM
Entpd2	4.35e-56	0.709012	0.175	0.034	8.54e-52	TM2_vs_other_TM
Tuba1c	5.33e-56	-1.15952	0.131	0.354	1.05e-51	TM1_vs_all_other_TM
Tgm2	7.52e-56	-0.93379	0.04	0.235	1.48e-51	TM1_vs_all_other_TM
C1qtnf2	1.1e-55	0.611632	0.208	0.05	2.16e-51	TM1_vs_all_other_TM
Tfap2b	1.73e-55	-1.08437	0.229	0.462	3.41e-51	TM2_vs_other_TM
Cd9	2.1e-55	0.695334	0.75	0.523	4.13e-51	TM1_vs_all_other_TM
Myl9	2.38e-55	-1.30001	0.338	0.53	4.67e-51	TM1_vs_all_other_TM
Mmp23	2.63e-55	0.545697	0.174	0.033	5.17e-51	TM1_vs_all_other_TM
Itih5	3.14e-55	1.58877	0.385	0.189	6.17e-51	TM2_vs_other_TM
Lrp1	3.32e-55	-0.670307	0.647	0.801	6.52e-51	TM3_vs_other_TM
Vegfa	3.75e-55	0.797795	0.327	0.128	7.36e-51	TM2_vs_other_TM
Thbs2	4.85e-55	-1.1392	0.154	0.373	9.52e-51	TM3_vs_other_TM
Nexn	9.66e-55	0.841758	0.296	0.113	1.9e-50	TM3_vs_other_TM
Adra2a	1.51e-54	0.700895	0.152	0.024	2.97e-50	TM3_vs_other_TM
Cyth3	1.88e-54	-0.774087	0.151	0.384	3.69e-50	TM3_vs_other_TM
Steap4	2.12e-54	0.752475	0.226	0.061	4.17e-50	TM1_vs_all_other_TM
Kitl	2.22e-54	-1.20272	0.153	0.364	4.37e-50	TM1_vs_all_other_TM
1500009L16Rik	2.62e-54	0.770018	0.269	0.091	5.15e-50	TM3_vs_other_TM
Fgf18	3.31e-54	0.588705	0.155	0.026	6.5e-50	TM1_vs_all_other_TM
Nupr1	3.93e-54	1.04166	0.778	0.596	7.72e-50	TM1_vs_all_other_TM
Tmem37	5.25e-54	-0.901599	0.084	0.294	1.03e-49	TM1_vs_all_other_TM
Rcn3	5.82e-54	0.836488	0.561	0.342	1.14e-49	TM1_vs_all_other_TM
Ltbp2	9.68e-54	-1.02286	0.049	0.236	1.9e-49	TM3_vs_other_TM
Akap12	1.15e-53	-0.889182	0.09	0.295	2.27e-49	TM3_vs_other_TM
Vkorc1	1.46e-53	0.714469	0.636	0.403	2.87e-49	TM1_vs_all_other_TM
Amotl2	1.52e-53	0.639394	0.255	0.08	2.98e-49	TM1_vs_all_other_TM
Fxyd1	1.6e-53	0.617214	0.748	0.603	3.15e-49	TM3_vs_other_TM
Ltbp1	2.03e-53	-0.985311	0.065	0.272	3.99e-49	TM2_vs_other_TM
Cda	2.34e-53	0.501269	0.165	0.03	4.6e-49	TM1_vs_all_other_TM
Efemp1	2.53e-53	-0.9775	0.069	0.27	4.97e-49	TM1_vs_all_other_TM
Fbn1	2.68e-53	0.824492	0.447	0.228	5.25e-49	TM2_vs_other_TM
Cyp1b1	2.92e-53	0.612434	0.201	0.048	5.74e-49	TM2_vs_other_TM
Cygb	3e-53	-1.25123	0.218	0.422	5.89e-49	TM3_vs_other_TM
Tspan6	3.65e-53	1.02502	0.467	0.24	7.17e-49	TM1_vs_all_other_TM
Prdx4	4.64e-53	0.748325	0.618	0.396	9.12e-49	TM1_vs_all_other_TM
Scube1	4.6e-52	0.495209	0.377	0.256	9.2e-49	All_TM_vs_all_other_cells
Chmp4c	5.46e-52	-0.252046	0.094	0.35	1.09e-48	All_TM_vs_all_other_cells
Cilp2	8.01e-53	-0.983084	0.002	0.147	1.57e-48	TM3_vs_other_TM
Tagln	9.18e-53	-2.06226	0.382	0.545	1.8e-48	TM1_vs_all_other_TM
A2m	1.09e-52	1.1841	0.319	0.129	2.15e-48	TM1_vs_all_other_TM
Scx	1.16e-52	0.524748	0.165	0.031	2.27e-48	TM1_vs_all_other_TM
Rtn4	1.33e-52	0.779199	0.595	0.433	2.62e-48	TM3_vs_other_TM
Emcn	1.37e-52	-0.877678	0.034	0.22	2.69e-48	TM1_vs_all_other_TM
Mir99ahg	2.24e-52	0.739247	0.382	0.168	4.4e-48	TM2_vs_other_TM
Bmper	2.38e-52	0.484524	0.17	0.033	4.68e-48	TM1_vs_all_other_TM
Sfrp2	2.89e-52	-2.0672	0.024	0.207	5.69e-48	TM2_vs_other_TM
Ecm1	2.93e-51	0.36935	0.464	0.416	5.87e-48	All_TM_vs_all_other_cells
Col6a2	3.95e-52	-0.835611	0.11	0.321	7.77e-48	TM3_vs_other_TM
Emb	4.73e-52	-0.948428	0.204	0.431	9.3e-48	TM3_vs_other_TM
Nucb2	5.25e-52	-0.792416	0.136	0.354	1.03e-47	TM3_vs_other_TM
Kitl	6.68e-52	-0.980806	0.158	0.374	1.31e-47	TM3_vs_other_TM
Tmsb4x	7.8e-52	0.407423	0.987	0.951	1.53e-47	TM3_vs_other_TM
Lypd1	8.43e-52	-1.16106	0.008	0.178	1.66e-47	TM2_vs_other_TM
Elob	1.01e-51	0.439985	0.95	0.909	1.98e-47	TM3_vs_other_TM
Chst2	1.12e-51	-0.897755	0.122	0.337	2.19e-47	TM1_vs_all_other_TM
Rplp1	1.51e-51	0.395353	0.95	0.875	2.97e-47	TM1_vs_all_other_TM
Tmem100	2.1e-51	-1.17528	0.146	0.357	4.13e-47	TM1_vs_all_other_TM
Eef1a1	2.59e-51	-0.44441	0.889	0.935	5.09e-47	TM3_vs_other_TM
Egfr	2.99e-51	-0.665464	0.025	0.19	5.88e-47	TM3_vs_other_TM
Cebpd	3.5e-51	-0.861311	0.796	0.879	6.88e-47	TM1_vs_all_other_TM
Mical2	3.7e-51	0.567367	0.145	0.024	7.28e-47	TM2_vs_other_TM
Cp	3.73e-51	-0.926709	0.046	0.233	7.33e-47	TM1_vs_all_other_TM
Socs3	3.9e-51	0.609849	0.855	0.739	7.67e-47	TM3_vs_other_TM
Npr3	4.25e-51	0.490191	0.142	0.022	8.34e-47	TM1_vs_all_other_TM
Ramp1	4.66e-51	0.705069	0.156	0.029	9.15e-47	TM3_vs_other_TM
Pi16	5.35e-51	-1.00445	0.03	0.196	1.05e-46	TM3_vs_other_TM
Dlk1	5.34e-51	0.65562	0.126	0.015	1.05e-46	TM1_vs_all_other_TM
Tpm2	6.73e-51	-0.988317	0.258	0.476	1.32e-46	TM2_vs_other_TM
Dsc2	1.14e-50	0.581103	0.126	0.015	2.24e-46	TM3_vs_other_TM
Syn3	1.79e-50	-0.722481	0.104	0.313	3.51e-46	TM3_vs_other_TM
Emcn	2.05e-50	0.825704	0.285	0.104	4.02e-46	TM2_vs_other_TM
Itm2a	2.16e-49	0.419734	0.411	0.305	4.32e-46	All_TM_vs_all_other_cells
Mgarp	2.71e-50	-1.20089	0.294	0.507	5.32e-46	TM2_vs_other_TM
Eea1	2.74e-50	-0.902895	0.305	0.504	5.39e-46	TM1_vs_all_other_TM
Igfbp5	3.07e-50	-0.910658	0.757	0.882	6.02e-46	TM1_vs_all_other_TM
Col16a1	3.67e-50	-0.947357	0.186	0.406	7.2e-46	TM3_vs_other_TM
C4b	3.83e-50	0.709349	0.432	0.221	7.52e-46	TM3_vs_other_TM
Aqp1	4.24e-50	0.783166	0.55	0.308	8.32e-46	TM1_vs_all_other_TM
Dstn	4.53e-50	-0.763197	0.691	0.826	8.91e-46	TM2_vs_other_TM
Ifitm1	8.35e-50	0.679549	0.588	0.372	1.64e-45	TM3_vs_other_TM
Arpc1b	9.8e-50	-0.687025	0.377	0.608	1.92e-45	TM3_vs_other_TM
Adamts1	1.09e-49	0.815063	0.422	0.204	2.14e-45	TM2_vs_other_TM
Tgfb2	1.13e-49	0.614305	0.243	0.075	2.21e-45	TM1_vs_all_other_TM
Ifitm3	1.8e-49	0.492387	0.928	0.876	3.54e-45	TM2_vs_other_TM
Pdia3	2.67e-49	0.613369	0.748	0.543	5.24e-45	TM1_vs_all_other_TM
Gas1	5.61e-49	-0.940391	0.318	0.537	1.1e-44	TM3_vs_other_TM
Angptl1	5.97e-49	0.943218	0.244	0.08	1.17e-44	TM2_vs_other_TM
Tmem140	6.35e-49	0.693621	0.219	0.063	1.25e-44	TM2_vs_other_TM
Steap3	6.64e-49	-0.674052	0.037	0.204	1.3e-44	TM3_vs_other_TM
Bpgm	8.03e-49	-0.749916	0.1	0.3	1.58e-44	TM3_vs_other_TM
Clu	9.67e-49	-1.41046	0.559	0.648	1.9e-44	TM3_vs_other_TM
Uqcr11	1.09e-48	0.530051	0.829	0.729	2.14e-44	TM3_vs_other_TM
Gas6	1.15e-48	-1.03236	0.431	0.612	2.26e-44	TM2_vs_other_TM
Nr2f2	1.37e-48	0.737968	0.384	0.192	2.69e-44	TM3_vs_other_TM
Rasl11a	1.83e-48	-1.2355	0.223	0.434	3.59e-44	TM1_vs_all_other_TM
Matn4	1.91e-48	-0.932404	0.007	0.146	3.74e-44	TM3_vs_other_TM
Hsp90b1	2.13e-48	0.57042	0.842	0.661	4.18e-44	TM1_vs_all_other_TM
Zeb2	4.18e-48	-0.903325	0.098	0.293	8.21e-44	TM1_vs_all_other_TM
Kcnk2	6.91e-48	0.499213	0.164	0.034	1.36e-43	TM1_vs_all_other_TM
Uqcr10	1.09e-47	0.53344	0.823	0.733	2.14e-43	TM3_vs_other_TM
Col14a1	1.22e-47	1.00809	0.208	0.061	2.4e-43	TM1_vs_all_other_TM
Ppib	1.41e-47	0.470283	0.896	0.807	2.76e-43	TM1_vs_all_other_TM
Fkbp7	1.64e-47	0.663205	0.463	0.242	3.21e-43	TM1_vs_all_other_TM
Comp	1.89e-47	-1.30032	0.016	0.161	3.72e-43	TM3_vs_other_TM
Timp3	2.43e-47	0.46101	0.88	0.685	4.77e-43	TM1_vs_all_other_TM
Ptprd	2.53e-47	-0.848709	0.174	0.395	4.98e-43	TM2_vs_other_TM
Clec11a	2.74e-47	-0.878019	0.103	0.293	5.39e-43	TM3_vs_other_TM
Fth1	6.18e-47	-0.369588	0.996	0.998	1.21e-42	TM1_vs_all_other_TM
Igfbp2	9e-47	-2.34791	0.297	0.469	1.77e-42	TM3_vs_other_TM
S100b	1.09e-45	0.314671	0.41	0.373	2.18e-42	All_TM_vs_all_other_cells
Tnfaip2	1.13e-46	0.640724	0.147	0.028	2.22e-42	TM2_vs_other_TM
Cd109	2.21e-46	0.467212	0.195	0.051	4.34e-42	TM1_vs_all_other_TM
Loxl1	2.83e-46	-0.755649	0.305	0.524	5.56e-42	TM3_vs_other_TM
Ndufa11	3.1e-46	0.569298	0.738	0.62	6.08e-42	TM3_vs_other_TM
Adora1	3.59e-46	-0.559468	0.003	0.131	7.04e-42	TM3_vs_other_TM
Gucy1a1	3.71e-46	0.630538	0.252	0.086	7.29e-42	TM2_vs_other_TM
Ckb	3.92e-46	-1.03917	0.347	0.515	7.69e-42	TM1_vs_all_other_TM
Rpl39l	5.64e-46	0.511094	0.173	0.04	1.11e-41	TM1_vs_all_other_TM
S100a4	6.1e-46	-0.787811	0.059	0.233	1.2e-41	TM3_vs_other_TM
Omd	7.56e-45	0.305283	0.347	0.21	1.51e-41	All_TM_vs_all_other_cells
Ppic	1.01e-45	0.573422	0.409	0.195	1.98e-41	TM1_vs_all_other_TM
Dut	1.05e-45	0.833608	0.382	0.192	2.07e-41	TM2_vs_other_TM
Aspn	1.3e-45	0.814681	0.296	0.117	2.55e-41	TM1_vs_all_other_TM
S100a4	1.36e-45	0.745445	0.288	0.112	2.68e-41	TM1_vs_all_other_TM
Cox6c	1.48e-45	-0.523634	0.912	0.932	2.9e-41	TM1_vs_all_other_TM
Alpl	1.49e-45	-0.853567	0.013	0.163	2.93e-41	TM1_vs_all_other_TM
H3f3b	1.91e-45	0.396606	0.97	0.934	3.75e-41	TM3_vs_other_TM
Crym	2.73e-45	-0.978335	0.013	0.162	5.35e-41	TM1_vs_all_other_TM
Postn	3.05e-45	-1.04662	0.132	0.339	6e-41	TM2_vs_other_TM
Sostdc1	3.73e-45	1.19426	0.271	0.111	7.33e-41	TM3_vs_other_TM
Cygb	4.92e-44	0.483684	0.362	0.288	9.84e-41	All_TM_vs_all_other_cells
P4ha1	8.66e-45	0.605433	0.437	0.22	1.7e-40	TM1_vs_all_other_TM
C1qtnf2	1.2e-44	-0.607345	0.014	0.152	2.36e-40	TM3_vs_other_TM
Sostdc1	1.23e-43	0.293354	0.373	0.308	2.47e-40	All_TM_vs_all_other_cells
Ppp1r2	1.32e-44	0.805587	0.558	0.368	2.59e-40	TM2_vs_other_TM
Rbp1	1.43e-44	0.581999	0.872	0.788	2.81e-40	TM1_vs_all_other_TM
Calcrl	1.44e-44	0.657427	0.303	0.122	2.83e-40	TM2_vs_other_TM
Col11a1	1.8e-44	-0.782009	0.13	0.326	3.53e-40	TM3_vs_other_TM
Runx1	2.61e-44	-0.657443	0.079	0.261	5.12e-40	TM3_vs_other_TM
Hspg2	2.63e-44	0.65573	0.369	0.169	5.16e-40	TM1_vs_all_other_TM
Nav1	2.67e-44	0.692931	0.367	0.175	5.25e-40	TM2_vs_other_TM
Serpinh1	2.89e-44	0.698299	0.669	0.479	5.68e-40	TM1_vs_all_other_TM
Myh10	2.92e-44	0.710699	0.338	0.163	5.73e-40	TM3_vs_other_TM
Zfhx3	3.59e-44	-0.724167	0.166	0.383	7.05e-40	TM2_vs_other_TM
Tnmd	3.61e-44	-1.87957	0.041	0.211	7.08e-40	TM2_vs_other_TM
Itgb1	4.61e-44	0.646142	0.726	0.617	9.05e-40	TM3_vs_other_TM
Adk	4.9e-44	0.487525	0.294	0.115	9.63e-40	TM1_vs_all_other_TM
Cxcl10	4.99e-44	-2.02754	0.025	0.18	9.8e-40	TM1_vs_all_other_TM
C1s1	7.18e-43	0.365106	0.379	0.287	1.44e-39	All_TM_vs_all_other_cells
Col5a2	7.57e-44	-0.747233	0.152	0.354	1.49e-39	TM3_vs_other_TM
Cpne8	8.5e-44	0.691123	0.316	0.134	1.67e-39	TM2_vs_other_TM
Ubb	9.27e-44	-0.435748	0.974	0.976	1.82e-39	TM1_vs_all_other_TM
Tec	1.32e-43	0.418448	0.103	0.011	2.58e-39	TM2_vs_other_TM
Ptma	1.93e-43	-0.351257	0.966	0.975	3.79e-39	TM1_vs_all_other_TM
Gm13889	1.91e-42	0.38141	0.361	0.277	3.83e-39	All_TM_vs_all_other_cells
Chil1	2.41e-42	0.701808	0.353	0.301	4.81e-39	All_TM_vs_all_other_cells
Vit	2.54e-43	-0.556842	0.004	0.127	4.99e-39	TM3_vs_other_TM
Vasn	2.6e-43	0.612276	0.308	0.128	5.12e-39	TM1_vs_all_other_TM
Prss12	2.76e-43	-0.642522	0.02	0.159	5.42e-39	TM3_vs_other_TM
Ctnna1	3.12e-43	0.727414	0.523	0.365	6.13e-39	TM3_vs_other_TM
Rrbp1	3.31e-43	0.527365	0.768	0.59	6.5e-39	TM1_vs_all_other_TM
Nkd2	4.33e-43	0.531968	0.197	0.057	8.5e-39	TM1_vs_all_other_TM
Rps4x	4.47e-43	-0.352126	0.963	0.973	8.78e-39	TM3_vs_other_TM
Lmx1b	4.91e-43	-0.80661	0.104	0.297	9.64e-39	TM2_vs_other_TM
Ctxn3	4.83e-42	0.417365	0.348	0.245	9.66e-39	All_TM_vs_all_other_cells
Fhl2	6.12e-43	0.604202	0.192	0.055	1.2e-38	TM2_vs_other_TM
Zfhx3	6.15e-43	0.583961	0.464	0.244	1.21e-38	TM1_vs_all_other_TM
Tm4sf1	6.75e-43	-0.771945	0.064	0.234	1.33e-38	TM3_vs_other_TM
Myl6	7.22e-43	-0.803053	0.932	0.931	1.42e-38	TM1_vs_all_other_TM
Twist1	7.99e-43	0.539937	0.491	0.273	1.57e-38	TM1_vs_all_other_TM
Itm2a	8.68e-43	-0.798671	0.268	0.475	1.71e-38	TM3_vs_other_TM
Add3	9.13e-43	0.660322	0.295	0.122	1.79e-38	TM2_vs_other_TM
Lgi2	9.73e-43	-0.685089	0.041	0.195	1.91e-38	TM3_vs_other_TM
Cyp26a1	1.07e-42	-0.913232	0.025	0.168	2.09e-38	TM3_vs_other_TM
Actg1	1.21e-42	-0.504415	0.726	0.847	2.38e-38	TM3_vs_other_TM
Cxcl10	1.26e-42	1.28895	0.237	0.082	2.47e-38	TM2_vs_other_TM
Plcxd3	1.4e-42	0.445198	0.114	0.016	2.75e-38	TM3_vs_other_TM
Rpl10	1.95e-42	-0.513082	0.635	0.784	3.82e-38	TM3_vs_other_TM
Ifi27l2a	1.95e-42	1.1376	0.394	0.205	3.83e-38	TM2_vs_other_TM
Mmp2	2.29e-42	-0.849087	0.125	0.314	4.49e-38	TM3_vs_other_TM
Boc	2.48e-42	0.560869	0.284	0.112	4.87e-38	TM1_vs_all_other_TM
Irf1	2.62e-42	-0.889423	0.543	0.676	5.16e-38	TM1_vs_all_other_TM
App	2.65e-42	0.53442	0.773	0.587	5.21e-38	TM1_vs_all_other_TM
Sptbn1	2.87e-42	-0.676037	0.492	0.681	5.64e-38	TM3_vs_other_TM
Peg3	2.93e-42	-0.676517	0.088	0.267	5.75e-38	TM3_vs_other_TM
Pitx2	3.65e-42	0.584531	0.715	0.591	7.17e-38	TM3_vs_other_TM
Rgs5	4.65e-42	-1.3839	0.012	0.14	9.14e-38	TM3_vs_other_TM
Fgl2	5.44e-42	-0.962778	0.148	0.333	1.07e-37	TM3_vs_other_TM
Mfap4	6e-42	-0.764956	0.409	0.603	1.18e-37	TM3_vs_other_TM
Cp	6.88e-42	0.69222	0.274	0.113	1.35e-37	TM3_vs_other_TM
Sfrp1	9.52e-42	-0.714692	0.046	0.202	1.87e-37	TM3_vs_other_TM
Tnc	1.17e-41	-0.728597	0.007	0.128	2.3e-37	TM3_vs_other_TM
Tnmd	1.21e-41	-1.69758	0.06	0.216	2.37e-37	TM3_vs_other_TM
Calcrl	1.46e-41	-0.811597	0.063	0.233	2.88e-37	TM1_vs_all_other_TM
Chst2	1.47e-41	0.711907	0.382	0.2	2.9e-37	TM3_vs_other_TM
Slc25a4	1.75e-41	0.421561	0.892	0.821	3.44e-37	TM3_vs_other_TM
Fth1	1.76e-41	0.429098	0.997	0.998	3.46e-37	TM2_vs_other_TM
Crip1	1.83e-41	0.710672	0.57	0.371	3.59e-37	TM2_vs_other_TM
Fbn1	3.33e-41	-0.712682	0.17	0.367	6.55e-37	TM3_vs_other_TM
Rrbp1	4.53e-41	-0.598371	0.543	0.709	8.9e-37	TM3_vs_other_TM
Zfp618	6.42e-41	0.645717	0.206	0.069	1.26e-36	TM3_vs_other_TM
Gapdh	7.51e-41	0.508662	0.816	0.73	1.48e-36	TM3_vs_other_TM
Selenop	9.32e-41	-0.691958	0.265	0.474	1.83e-36	TM3_vs_other_TM
Herpud1	1.04e-40	-0.637844	0.257	0.47	2.05e-36	TM3_vs_other_TM
Sncaip	1.24e-40	-0.783436	0.069	0.235	2.43e-36	TM1_vs_all_other_TM
Lgals1	1.42e-40	0.526509	0.85	0.762	2.78e-36	TM3_vs_other_TM
Fst	1.44e-40	-0.645043	0.012	0.136	2.83e-36	TM3_vs_other_TM
C130021I20Rik	1.52e-40	0.716154	0.297	0.139	2.99e-36	TM3_vs_other_TM
Lamc3	1.76e-40	-0.743124	0.02	0.16	3.45e-36	TM1_vs_all_other_TM
Cd302	1.83e-40	0.600283	0.759	0.613	3.59e-36	TM2_vs_other_TM
Ncam1	2.05e-40	0.638978	0.597	0.43	4.03e-36	TM3_vs_other_TM
Txndc5	2.19e-40	0.52726	0.37	0.177	4.31e-36	TM1_vs_all_other_TM
Tfap2b	2.39e-40	-0.935704	0.269	0.45	4.69e-36	TM1_vs_all_other_TM
C1ra	2.69e-40	0.577986	0.36	0.17	5.28e-36	TM1_vs_all_other_TM
Procr	2.71e-40	0.619552	0.17	0.047	5.33e-36	TM3_vs_other_TM
Atp1b2	2.78e-40	0.616306	0.249	0.098	5.47e-36	TM3_vs_other_TM
Foxf2	5.54e-40	-0.696102	0.03	0.175	1.09e-35	TM1_vs_all_other_TM
Angptl1	8.3e-40	-0.955607	0.04	0.183	1.63e-35	TM3_vs_other_TM
Lhfp	1.06e-39	0.648672	0.545	0.394	2.08e-35	TM3_vs_other_TM
Rpl30	1.13e-39	-0.292061	0.978	0.983	2.22e-35	TM3_vs_other_TM
Pdpn	1.38e-39	-0.609939	0.076	0.242	2.7e-35	TM3_vs_other_TM
Dbi	1.41e-39	-0.625401	0.684	0.795	2.78e-35	TM1_vs_all_other_TM
Ddost	1.5e-39	0.592534	0.459	0.258	2.94e-35	TM1_vs_all_other_TM
B2m	1.5e-39	-0.592746	0.381	0.595	2.95e-35	TM3_vs_other_TM
Ppp1r15a	1.54e-39	-0.706476	0.601	0.712	3.02e-35	TM1_vs_all_other_TM
Ntn4	1.65e-39	0.587027	0.277	0.113	3.24e-35	TM1_vs_all_other_TM
Id1	1.69e-39	-0.669511	0.142	0.333	3.32e-35	TM3_vs_other_TM
P3h3	1.77e-39	-0.631597	0.172	0.368	3.48e-35	TM3_vs_other_TM
Rbpms	1.96e-39	0.657262	0.316	0.153	3.85e-35	TM3_vs_other_TM
Selenos	2e-39	0.547243	0.674	0.473	3.94e-35	TM1_vs_all_other_TM
Col4a4	2.01e-39	0.58906	0.142	0.032	3.94e-35	TM1_vs_all_other_TM
Slit3	2.11e-39	-0.658326	0.051	0.202	4.14e-35	TM3_vs_other_TM
Atp5j2	2.16e-39	0.449088	0.819	0.749	4.25e-35	TM3_vs_other_TM
Calm1	2.42e-39	-0.463872	0.841	0.874	4.75e-35	TM1_vs_all_other_TM
Grb14	2.57e-39	0.545942	0.145	0.034	5.04e-35	TM3_vs_other_TM
Son	5.42e-39	0.411845	0.891	0.833	1.06e-34	TM3_vs_other_TM
Cpz	5.72e-39	-0.551307	0.002	0.111	1.12e-34	TM3_vs_other_TM
Bicc1	9.36e-39	0.634953	0.315	0.145	1.84e-34	TM2_vs_other_TM
Igfbp7	9.39e-39	-0.460429	0.972	0.961	1.85e-34	TM3_vs_other_TM
Gpx4	9.85e-39	-0.567287	0.678	0.747	1.94e-34	TM1_vs_all_other_TM
Fbln5	1.08e-38	-0.807199	0.261	0.447	2.11e-34	TM3_vs_other_TM
Ier2	1.45e-38	0.501719	0.884	0.833	2.84e-34	TM2_vs_other_TM
Ogn	1.72e-38	-0.708565	0.362	0.554	3.38e-34	TM3_vs_other_TM
Aspn	1.78e-37	0.29717	0.325	0.194	3.55e-34	All_TM_vs_all_other_cells
Socs3	1.87e-38	-0.576645	0.724	0.809	3.67e-34	TM1_vs_all_other_TM
Fuca1	2.3e-38	-0.651691	0.243	0.445	4.51e-34	TM3_vs_other_TM
Prrx2	2.49e-38	0.477121	0.405	0.203	4.9e-34	TM1_vs_all_other_TM
Cthrc1	2.61e-38	-0.59559	0.018	0.143	5.12e-34	TM3_vs_other_TM
Wls	2.68e-38	0.52748	0.61	0.387	5.27e-34	TM1_vs_all_other_TM
Aldh1a1	2.73e-38	-0.485279	0.012	0.131	5.36e-34	TM3_vs_other_TM
Pik3r1	3.1e-38	-0.741533	0.2	0.395	6.08e-34	TM3_vs_other_TM
Slc26a7	3.43e-38	0.461052	0.176	0.051	6.75e-34	TM1_vs_all_other_TM
Creb3l1	3.59e-38	0.465583	0.218	0.076	7.05e-34	TM1_vs_all_other_TM
Cyp26b1	3.82e-38	-0.903473	0.019	0.144	7.5e-34	TM3_vs_other_TM
Junb	4.36e-38	0.381016	0.977	0.951	8.57e-34	TM3_vs_other_TM
Scpep1	4.59e-38	0.538678	0.33	0.152	9.01e-34	TM1_vs_all_other_TM
Rps3a1	4.89e-38	-0.316276	0.964	0.967	9.6e-34	TM3_vs_other_TM
P2ry14	5e-38	-0.594636	0.009	0.133	9.83e-34	TM1_vs_all_other_TM
Crispld1	5.83e-38	-0.494393	0.005	0.114	1.14e-33	TM3_vs_other_TM
Fos	5.95e-38	-0.374243	0.972	0.975	1.17e-33	TM1_vs_all_other_TM
Meg3	6.19e-38	0.61764	0.579	0.364	1.22e-33	TM1_vs_all_other_TM
Fat1	6.24e-38	0.506737	0.258	0.102	1.23e-33	TM1_vs_all_other_TM
Aldh3a1	6.3e-38	-0.813856	0.153	0.334	1.24e-33	TM3_vs_other_TM
Tuba1c	8.39e-38	-0.994656	0.155	0.336	1.65e-33	TM2_vs_other_TM
Ptgis	8.92e-38	0.500629	0.529	0.306	1.75e-33	TM1_vs_all_other_TM
Olfml1	9.72e-38	0.476858	0.193	0.061	1.91e-33	TM1_vs_all_other_TM
Rps5	1.12e-37	-0.383874	0.893	0.925	2.19e-33	TM3_vs_other_TM
Col1a2	1.32e-37	-1.33803	0.757	0.799	2.6e-33	TM2_vs_other_TM
Stk17b	1.33e-37	-0.705176	0.061	0.225	2.61e-33	TM2_vs_other_TM
Il11ra1	1.45e-37	0.55517	0.726	0.559	2.85e-33	TM1_vs_all_other_TM
Etv1	1.55e-37	0.510235	0.143	0.034	3.04e-33	TM2_vs_other_TM
Rpl37	2.36e-37	-0.305626	0.99	0.986	4.63e-33	TM3_vs_other_TM
Ftl1	2.41e-37	0.465594	0.924	0.909	4.73e-33	TM2_vs_other_TM
Crtap	2.53e-37	0.499722	0.321	0.148	4.96e-33	TM1_vs_all_other_TM
Runx1	3.16e-37	0.526439	0.309	0.138	6.21e-33	TM1_vs_all_other_TM
Bst2	3.38e-37	0.663259	0.409	0.243	6.64e-33	TM3_vs_other_TM
Pdgfa	3.76e-37	0.439718	0.259	0.102	7.38e-33	TM1_vs_all_other_TM
Serpina3n	4.57e-37	0.473013	0.149	0.037	8.98e-33	TM1_vs_all_other_TM
Id2	5.51e-37	-0.668218	0.252	0.453	1.08e-32	TM3_vs_other_TM
Chpf	6.69e-37	-0.628753	0.144	0.327	1.31e-32	TM3_vs_other_TM
Rcan2	7.98e-37	0.521256	0.14	0.034	1.57e-32	TM3_vs_other_TM
Vit	9.78e-37	0.425485	0.161	0.044	1.92e-32	TM1_vs_all_other_TM
Pcolce	1.14e-36	-0.737323	0.678	0.768	2.23e-32	TM3_vs_other_TM
Atp8a2	1.17e-36	0.372077	0.105	0.017	2.3e-32	TM1_vs_all_other_TM
Psmb8	1.28e-36	0.558129	0.241	0.094	2.51e-32	TM2_vs_other_TM
Dpep1	1.45e-36	0.478075	0.11	0.019	2.85e-32	TM1_vs_all_other_TM
Ftl1	1.49e-36	-0.534043	0.906	0.917	2.92e-32	TM1_vs_all_other_TM
Pdzd2	1.54e-36	0.387969	0.107	0.018	3.02e-32	TM1_vs_all_other_TM
Lmo4	1.65e-36	0.718011	0.661	0.525	3.24e-32	TM2_vs_other_TM
Cecr2	1.76e-36	0.421577	0.102	0.015	3.46e-32	TM3_vs_other_TM
Cpxm2	1.77e-36	-0.822519	0.084	0.253	3.48e-32	TM2_vs_other_TM
Olfml2a	1.87e-36	-0.544193	0.045	0.185	3.67e-32	TM3_vs_other_TM
Tshz2	1.94e-36	-0.746995	0.226	0.407	3.82e-32	TM1_vs_all_other_TM
Nupr1	2.11e-36	-0.821702	0.54	0.722	4.14e-32	TM3_vs_other_TM
Cox4i1	2.75e-36	0.43164	0.848	0.77	5.41e-32	TM3_vs_other_TM
Ndufa5	2.79e-36	0.445999	0.802	0.715	5.49e-32	TM3_vs_other_TM
C130021I20Rik	3.52e-36	-0.717058	0.083	0.247	6.91e-32	TM2_vs_other_TM
Trpm1	4.12e-35	-0.250044	0.32	0.466	8.24e-32	All_TM_vs_all_other_cells
Mpped2	4.49e-36	0.344154	0.128	0.028	8.82e-32	TM1_vs_all_other_TM
Map2	4.99e-36	0.320081	0.103	0.016	9.8e-32	TM1_vs_all_other_TM
Timp1	6.75e-36	-0.615888	0.033	0.165	1.33e-31	TM3_vs_other_TM
Rmst	6.89e-36	-0.569482	0.004	0.123	1.35e-31	TM2_vs_other_TM
Smpdl3a	8.42e-36	-0.529982	0.043	0.179	1.65e-31	TM3_vs_other_TM
Foxd2os	9.85e-36	0.647603	0.287	0.133	1.93e-31	TM2_vs_other_TM
Rarres2	1.04e-35	0.531491	0.73	0.575	2.04e-31	TM2_vs_other_TM
Vegfa	1.22e-35	-0.62833	0.089	0.247	2.39e-31	TM3_vs_other_TM
Mmp3	1.29e-35	-2.50763	0.007	0.112	2.53e-31	TM3_vs_other_TM
Cpq	1.43e-35	-0.569306	0.261	0.463	2.81e-31	TM3_vs_other_TM
Lmod1	1.55e-35	0.426463	0.112	0.021	3.05e-31	TM3_vs_other_TM
Myof	1.71e-35	0.463664	0.24	0.093	3.36e-31	TM1_vs_all_other_TM
Enho	1.77e-35	0.614923	0.237	0.098	3.47e-31	TM3_vs_other_TM
Entpd2	2.18e-35	-0.518427	0.009	0.116	4.29e-31	TM3_vs_other_TM
Gpha2	2.35e-35	-2.25697	0.043	0.188	4.61e-31	TM2_vs_other_TM
Fmo1	2.7e-35	0.448352	0.443	0.238	5.31e-31	TM1_vs_all_other_TM
Ogn	2.71e-35	-0.743967	0.347	0.544	5.32e-31	TM2_vs_other_TM
Ly6a	2.79e-35	-0.616722	0.007	0.113	5.48e-31	TM3_vs_other_TM
Cacna1g	2.82e-35	0.502156	0.261	0.109	5.53e-31	TM1_vs_all_other_TM
Peg3	3.09e-35	0.507297	0.314	0.147	6.06e-31	TM1_vs_all_other_TM
Clta	3.31e-35	0.50781	0.694	0.589	6.5e-31	TM3_vs_other_TM
Mrvi1	3.66e-35	0.438954	0.111	0.021	7.18e-31	TM3_vs_other_TM
Gpc1	3.68e-35	0.539184	0.158	0.045	7.23e-31	TM1_vs_all_other_TM
Bpgm	3.7e-34	0.261353	0.287	0.226	7.41e-31	All_TM_vs_all_other_cells
Bpifb1	4.38e-35	-0.883003	0.007	0.112	8.61e-31	TM3_vs_other_TM
Edil3	5.03e-35	0.36833	0.108	0.019	9.88e-31	TM2_vs_other_TM
Heyl	5.88e-35	0.470326	0.137	0.034	1.16e-30	TM2_vs_other_TM
Lbp	5.92e-35	-0.695811	0.135	0.306	1.16e-30	TM3_vs_other_TM
Aldh1a2	7.73e-35	-0.613395	0.061	0.205	1.52e-30	TM3_vs_other_TM
Clstn2	7.89e-35	0.363904	0.138	0.034	1.55e-30	TM1_vs_all_other_TM
Cxcl14	8.06e-35	-0.613119	0.005	0.106	1.58e-30	TM3_vs_other_TM
Spp1	8.69e-35	1.97071	0.465	0.313	1.71e-30	TM2_vs_other_TM
Prrx2	8.84e-35	-0.5459	0.154	0.335	1.74e-30	TM3_vs_other_TM
Cacna2d1	1.05e-34	-0.809689	0.114	0.274	2.06e-30	TM1_vs_all_other_TM
Ecm2	1.09e-34	-0.573337	0.055	0.197	2.15e-30	TM3_vs_other_TM
Oaz1	1.2e-34	0.329672	0.938	0.909	2.35e-30	TM3_vs_other_TM
A2m	1.23e-34	-0.959367	0.094	0.247	2.42e-30	TM3_vs_other_TM
Man2b2	1.37e-34	0.362009	0.151	0.041	2.69e-30	TM1_vs_all_other_TM
Mt1	1.4e-34	0.894111	0.767	0.654	2.76e-30	TM2_vs_other_TM
Tnc	1.44e-34	0.626715	0.16	0.047	2.82e-30	TM1_vs_all_other_TM
Ccn1	1.72e-33	0.289451	0.492	0.484	3.44e-30	All_TM_vs_all_other_cells
Slc26a7	1.85e-34	-0.502222	0.019	0.133	3.62e-30	TM3_vs_other_TM
Cox6b1	2.32e-34	0.442474	0.808	0.729	4.55e-30	TM3_vs_other_TM
Fzd1	2.48e-33	0.303342	0.394	0.393	4.96e-30	All_TM_vs_all_other_cells
Gxylt2	3.91e-34	0.333483	0.12	0.026	7.67e-30	TM1_vs_all_other_TM
Rspo2	4e-34	0.59786	0.201	0.076	7.87e-30	TM3_vs_other_TM
Cdh11	4.2e-34	-0.621789	0.429	0.573	8.25e-30	TM1_vs_all_other_TM
Omd	4.45e-34	-0.725567	0.067	0.21	8.74e-30	TM3_vs_other_TM
Ntf3	5.6e-34	-0.664601	0.04	0.173	1.1e-29	TM1_vs_all_other_TM
Cpe	6.26e-34	-0.667533	0.266	0.454	1.23e-29	TM2_vs_other_TM
Nostrin	6.34e-34	-0.625747	0.017	0.136	1.24e-29	TM1_vs_all_other_TM
Rflna	7.11e-34	0.344791	0.143	0.038	1.4e-29	TM1_vs_all_other_TM
Tmed3	7.87e-34	-0.606243	0.237	0.419	1.55e-29	TM3_vs_other_TM
Tgfb1	7.91e-34	0.572926	0.267	0.116	1.55e-29	TM1_vs_all_other_TM
Cmbl	7.99e-34	0.545684	0.175	0.058	1.57e-29	TM3_vs_other_TM
Tspan11	8.51e-34	-0.480528	0.005	0.105	1.67e-29	TM3_vs_other_TM
Sdf4	9.07e-34	0.524616	0.519	0.324	1.78e-29	TM1_vs_all_other_TM
Mxra8	9.47e-34	-0.627458	0.232	0.418	1.86e-29	TM3_vs_other_TM
Ogfrl1	1.07e-33	-1.33682	0.335	0.484	2.1e-29	TM2_vs_other_TM
Abcb1a	1.09e-33	-0.562778	0.013	0.13	2.15e-29	TM1_vs_all_other_TM
Efna5	1.11e-33	0.390091	0.186	0.062	2.18e-29	TM1_vs_all_other_TM
Rpn2	1.54e-33	0.506382	0.378	0.2	3.03e-29	TM1_vs_all_other_TM
Ivns1abp	1.58e-33	0.467656	0.187	0.064	3.1e-29	TM1_vs_all_other_TM
Atf5	1.63e-33	-0.616998	0.065	0.209	3.2e-29	TM3_vs_other_TM
Nr1d1	1.63e-33	-0.558442	0.031	0.152	3.2e-29	TM3_vs_other_TM
Csrp2	1.74e-33	-0.740764	0.228	0.414	3.42e-29	TM2_vs_other_TM
Pcolce	1.78e-33	-0.662368	0.657	0.77	3.5e-29	TM2_vs_other_TM
Rpl23	1.93e-33	-0.302603	0.947	0.964	3.8e-29	TM3_vs_other_TM
Ccn5	2.08e-33	-0.641708	0.011	0.116	4.08e-29	TM3_vs_other_TM
Wnt4	2.18e-33	0.578298	0.157	0.049	4.28e-29	TM3_vs_other_TM
Cd34	2.41e-33	-0.520298	0.004	0.101	4.74e-29	TM3_vs_other_TM
Gstt1	3.3e-33	0.633017	0.345	0.194	6.47e-29	TM3_vs_other_TM
Rpl30	4.53e-33	0.285423	0.985	0.98	8.9e-29	TM2_vs_other_TM
Fmo1	4.67e-32	0.374166	0.364	0.301	9.34e-29	All_TM_vs_all_other_cells
Piezo2	4.81e-33	0.534925	0.208	0.078	9.45e-29	TM1_vs_all_other_TM
Vasn	6.74e-33	-0.531797	0.089	0.244	1.32e-28	TM3_vs_other_TM
Tns3	6.83e-33	0.428946	0.247	0.102	1.34e-28	TM1_vs_all_other_TM
Tmsb4x	7.21e-33	-0.303093	0.945	0.973	1.42e-28	TM1_vs_all_other_TM
Hexa	7.34e-33	0.461999	0.373	0.195	1.44e-28	TM1_vs_all_other_TM
Nme2	8.48e-33	-0.418277	0.794	0.871	1.67e-28	TM3_vs_other_TM
Flna	1.01e-32	-0.745734	0.245	0.417	1.98e-28	TM2_vs_other_TM
Tmed10	1.19e-32	0.480143	0.671	0.497	2.34e-28	TM1_vs_all_other_TM
Mir99ahg	1.19e-32	-0.697188	0.126	0.286	2.34e-28	TM1_vs_all_other_TM
Procr	1.53e-32	-0.596394	0.016	0.129	3.01e-28	TM1_vs_all_other_TM
Nme2	1.59e-32	0.324321	0.899	0.815	3.12e-28	TM1_vs_all_other_TM
Egfr	1.65e-32	0.339582	0.222	0.085	3.24e-28	TM1_vs_all_other_TM
Ooep	1.84e-32	-0.71966	0.007	0.104	3.61e-28	TM3_vs_other_TM
Fbxl7	1.86e-32	0.556113	0.166	0.055	3.66e-28	TM3_vs_other_TM
Bpgm	1.95e-32	0.528427	0.339	0.173	3.83e-28	TM1_vs_all_other_TM
Ramp1	1.98e-32	-0.58461	0.002	0.108	3.9e-28	TM2_vs_other_TM
Cxcl1	2.29e-31	0.325868	0.338	0.285	4.59e-28	All_TM_vs_all_other_cells
Ednra	2.4e-32	0.610873	0.28	0.132	4.72e-28	TM2_vs_other_TM
Malat1	2.55e-32	-0.317189	0.997	0.995	5.01e-28	TM1_vs_all_other_TM
Cebpd	2.62e-32	0.542379	0.896	0.833	5.15e-28	TM2_vs_other_TM
Ifitm3	2.65e-32	0.339574	0.943	0.862	5.2e-28	TM3_vs_other_TM
Uqcrb	3.14e-32	0.41049	0.812	0.729	6.16e-28	TM3_vs_other_TM
Col4a3	3.93e-32	0.510793	0.1	0.019	7.72e-28	TM1_vs_all_other_TM
Bambi	3.95e-32	0.769451	0.429	0.262	7.75e-28	TM2_vs_other_TM
Cox8a	4.29e-32	-0.35695	0.945	0.949	8.42e-28	TM1_vs_all_other_TM
Des	4.62e-32	0.448704	0.128	0.032	9.07e-28	TM2_vs_other_TM
Atp1b1	5.27e-32	-0.727783	0.009	0.121	1.04e-27	TM2_vs_other_TM
Abi3bp	5.33e-32	-0.72591	0.62	0.751	1.05e-27	TM2_vs_other_TM
Prg4	5.4e-32	0.880871	0.107	0.022	1.06e-27	TM1_vs_all_other_TM
Adamts1	5.91e-32	-0.802538	0.161	0.324	1.16e-27	TM1_vs_all_other_TM
App	6.08e-32	-0.537847	0.554	0.689	1.19e-27	TM2_vs_other_TM
Cpxm2	6.12e-32	-0.787167	0.106	0.256	1.2e-27	TM3_vs_other_TM
Emp1	7.19e-32	0.563785	0.595	0.404	1.41e-27	TM1_vs_all_other_TM
Mfap5	7.21e-32	-0.810806	0.134	0.288	1.42e-27	TM3_vs_other_TM
Lmcd1	7.79e-32	-0.411826	0.011	0.111	1.53e-27	TM3_vs_other_TM
Nostrin	7.89e-32	-0.534758	0.025	0.139	1.55e-27	TM3_vs_other_TM
Zfp36l2	8.81e-32	0.602914	0.709	0.602	1.73e-27	TM3_vs_other_TM
Hspb2	1.04e-31	-0.55465	0.053	0.195	2.04e-27	TM2_vs_other_TM
Calml4	1.07e-31	-0.688948	0.139	0.295	2.11e-27	TM1_vs_all_other_TM
Crispld2	1.1e-31	-0.732233	0.375	0.543	2.17e-27	TM3_vs_other_TM
Foxf2	1.12e-31	0.509843	0.219	0.087	2.19e-27	TM2_vs_other_TM
Ccl7	1.18e-31	1.00638	0.147	0.044	2.32e-27	TM2_vs_other_TM
Rpsa	1.37e-31	0.343153	0.951	0.939	2.69e-27	TM2_vs_other_TM
Pik3r1	1.66e-31	-0.785225	0.204	0.377	3.26e-27	TM2_vs_other_TM
Gm12216	1.76e-31	-0.765403	0.092	0.236	3.46e-27	TM1_vs_all_other_TM
Marcks	1.8e-31	-0.560705	0.228	0.412	3.53e-27	TM3_vs_other_TM
Uqcr11	1.82e-31	-0.497274	0.721	0.787	3.57e-27	TM1_vs_all_other_TM
Hif1a	2.23e-31	-0.620254	0.282	0.465	4.39e-27	TM2_vs_other_TM
Pcp4l1	2.37e-31	-0.572567	0.01	0.121	4.66e-27	TM2_vs_other_TM
Prxl2a	3.05e-31	0.563514	0.23	0.102	5.98e-27	TM3_vs_other_TM
Nrp1	3.3e-31	0.643547	0.53	0.365	6.47e-27	TM2_vs_other_TM
Ccn1	3.99e-31	-0.730805	0.284	0.472	7.83e-27	TM2_vs_other_TM
Scarf2	5.52e-31	0.477282	0.495	0.303	1.08e-26	TM1_vs_all_other_TM
Steap4	5.94e-31	-0.652123	0.029	0.153	1.17e-26	TM2_vs_other_TM
Hmgb1	5.93e-31	-0.401238	0.84	0.868	1.17e-26	TM1_vs_all_other_TM
Pcdh7	7.11e-31	-0.674229	0.112	0.27	1.4e-26	TM2_vs_other_TM
Cst3	7.44e-31	-1.1899	0.916	0.94	1.46e-26	TM2_vs_other_TM
Txndc5	8.73e-31	-0.48153	0.136	0.3	1.72e-26	TM3_vs_other_TM
Ppp1r1a	1.01e-30	0.489695	0.124	0.032	1.98e-26	TM3_vs_other_TM
Lpar1	1.14e-30	-0.44775	0.023	0.132	2.25e-26	TM3_vs_other_TM
Hexa	1.21e-30	-0.530252	0.15	0.313	2.39e-26	TM3_vs_other_TM
Col6a3	1.28e-29	0.307281	0.404	0.343	2.56e-26	All_TM_vs_all_other_cells
Serpina3n	1.6e-30	-0.509889	0.012	0.11	3.14e-26	TM3_vs_other_TM
Gdf10	2.12e-30	-0.5498	0.036	0.152	4.17e-26	TM3_vs_other_TM
Plekha4	2.39e-30	0.497166	0.196	0.074	4.7e-26	TM2_vs_other_TM
Ppia	2.44e-30	-0.283547	0.973	0.979	4.79e-26	TM2_vs_other_TM
Plpp3	2.75e-30	0.447719	0.86	0.71	5.4e-26	TM1_vs_all_other_TM
Fbln2	2.86e-30	-0.570054	0.03	0.142	5.61e-26	TM3_vs_other_TM
Ssr4	3.27e-30	0.481918	0.715	0.576	6.42e-26	TM1_vs_all_other_TM
Prelid2	3.42e-30	0.46276	0.145	0.045	6.72e-26	TM3_vs_other_TM
Cyp1b1	3.8e-30	-0.552556	0.02	0.131	7.46e-26	TM1_vs_all_other_TM
Lsp1	3.99e-29	0.272393	0.334	0.276	7.97e-26	All_TM_vs_all_other_cells
Idi1	4.36e-30	-0.580851	0.025	0.145	8.57e-26	TM2_vs_other_TM
Kcnip3	4.57e-30	0.512479	0.174	0.064	8.97e-26	TM3_vs_other_TM
Cox6c	5.97e-30	-0.403161	0.896	0.938	1.17e-25	TM2_vs_other_TM
Rmst	6.04e-30	0.357621	0.16	0.051	1.19e-25	TM1_vs_all_other_TM
Matn4	6.25e-30	-0.770427	0.017	0.129	1.23e-25	TM2_vs_other_TM
Idi1	6.64e-30	0.578508	0.178	0.067	1.3e-25	TM3_vs_other_TM
Fbn1	7.72e-29	0.356656	0.417	0.395	1.54e-25	All_TM_vs_all_other_cells
Smoc1	8.39e-30	-0.650279	0.251	0.423	1.65e-25	TM3_vs_other_TM
Rgs7bp	8.64e-30	-0.631193	0.077	0.214	1.7e-25	TM1_vs_all_other_TM
Rorb	9.02e-30	-0.624162	0.014	0.123	1.77e-25	TM2_vs_other_TM
Bhlhe41	1.01e-29	-0.512131	0.032	0.144	1.99e-25	TM3_vs_other_TM
Hexb	1.02e-29	0.45004	0.285	0.136	2e-25	TM1_vs_all_other_TM
Itih5	1.06e-29	-1.1285	0.148	0.298	2.07e-25	TM1_vs_all_other_TM
Atp5k	1.14e-29	0.430141	0.766	0.672	2.23e-25	TM3_vs_other_TM
Col11a1	1.46e-29	0.616647	0.361	0.207	2.86e-25	TM2_vs_other_TM
Ndufb8	1.53e-29	0.553243	0.593	0.477	3.01e-25	TM3_vs_other_TM
Wnt5a	1.75e-29	-0.628317	0.19	0.354	3.44e-25	TM3_vs_other_TM
Foxc1	2.27e-29	-0.657852	0.277	0.428	4.46e-25	TM1_vs_all_other_TM
Alcam	2.31e-29	-0.506508	0.015	0.125	4.55e-25	TM2_vs_other_TM
Tmem140	2.35e-29	-0.600982	0.033	0.149	4.61e-25	TM1_vs_all_other_TM
4930523C07Rik	2.42e-29	0.554959	0.229	0.099	4.75e-25	TM2_vs_other_TM
S100a10	2.43e-29	0.587068	0.628	0.461	4.77e-25	TM1_vs_all_other_TM
Pgf	2.73e-29	-0.918411	0.116	0.257	5.36e-25	TM3_vs_other_TM
Lbp	2.88e-29	0.597518	0.351	0.195	5.65e-25	TM2_vs_other_TM
Cav1	2.91e-29	-0.459107	0.013	0.121	5.71e-25	TM2_vs_other_TM
Irgm1	2.95e-29	0.594464	0.235	0.104	5.79e-25	TM2_vs_other_TM
Rerg	3e-29	-0.587746	0.143	0.302	5.9e-25	TM2_vs_other_TM
Tmed10	3.2e-29	-0.487617	0.446	0.616	6.29e-25	TM3_vs_other_TM
Iscu	3.27e-29	0.557167	0.552	0.423	6.43e-25	TM3_vs_other_TM
Ndrg2	3.28e-29	-0.654508	0.091	0.229	6.44e-25	TM1_vs_all_other_TM
Timp1	3.3e-29	0.546003	0.199	0.077	6.48e-25	TM1_vs_all_other_TM
Tagln2	3.64e-29	-0.664738	0.192	0.345	7.14e-25	TM1_vs_all_other_TM
Tmem37	5.06e-29	0.575914	0.334	0.177	9.94e-25	TM2_vs_other_TM
Pcbd1	5.11e-29	0.467935	0.136	0.041	1e-24	TM3_vs_other_TM
Gnas	5.8e-29	-0.426091	0.927	0.936	1.14e-24	TM3_vs_other_TM
Smap1	6.14e-29	0.528799	0.603	0.478	1.21e-24	TM3_vs_other_TM
H3f3a	6.31e-29	-0.399822	0.851	0.876	1.24e-24	TM1_vs_all_other_TM
Slc38a1	6.4e-29	0.355901	0.117	0.03	1.26e-24	TM1_vs_all_other_TM
Bsg	7.79e-29	-0.54875	0.667	0.771	1.53e-24	TM3_vs_other_TM
Rpl10	8.56e-29	0.45038	0.785	0.705	1.68e-24	TM2_vs_other_TM
Atp5l	9.63e-29	0.347536	0.914	0.872	1.89e-24	TM3_vs_other_TM
Gpc3	9.71e-28	0.443308	0.427	0.437	1.94e-24	All_TM_vs_all_other_cells
Pdgfra	1.26e-28	-1.03564	0.27	0.407	2.48e-24	TM1_vs_all_other_TM
Lmo4	1.36e-28	-0.598764	0.465	0.626	2.68e-24	TM3_vs_other_TM
Plpp1	1.4e-28	-0.571997	0.17	0.336	2.75e-24	TM2_vs_other_TM
Hmcn1	1.4e-28	0.508937	0.601	0.43	2.76e-24	TM2_vs_other_TM
Bmper	1.46e-28	-0.42569	0.017	0.113	2.87e-24	TM3_vs_other_TM
Dach1	1.55e-28	-0.458034	0.009	0.105	3.05e-24	TM1_vs_all_other_TM
Rbpms	1.6e-28	-0.63436	0.117	0.259	3.15e-24	TM1_vs_all_other_TM
Rtn1	1.7e-28	-0.645916	0.116	0.266	3.34e-24	TM2_vs_other_TM
Cdh2	1.72e-28	-0.466173	0.008	0.109	3.37e-24	TM2_vs_other_TM
Ap1s2	1.73e-28	0.289625	0.105	0.024	3.39e-24	TM1_vs_all_other_TM
Rbp4	1.82e-28	-1.12277	0.075	0.211	3.57e-24	TM2_vs_other_TM
Cysltr1	1.95e-28	0.42302	0.16	0.054	3.83e-24	TM2_vs_other_TM
Fkbp9	2.06e-28	-0.609505	0.232	0.4	4.04e-24	TM3_vs_other_TM
Lrp1	2.47e-28	0.504949	0.786	0.727	4.85e-24	TM2_vs_other_TM
Cyth3	2.52e-28	0.429661	0.417	0.241	4.94e-24	TM1_vs_all_other_TM
Mgp	2.75e-28	0.415687	0.979	0.901	5.4e-24	TM2_vs_other_TM
Bst2	2.75e-28	-0.645893	0.2	0.354	5.4e-24	TM1_vs_all_other_TM
Penk	2.87e-28	-1.51378	0.194	0.334	5.63e-24	TM3_vs_other_TM
Eya2	3.39e-28	0.643553	0.281	0.152	6.66e-24	TM3_vs_other_TM
Lhfp	3.48e-28	-0.5299	0.329	0.502	6.83e-24	TM2_vs_other_TM
Bicc1	3.77e-28	-0.453761	0.104	0.251	7.4e-24	TM3_vs_other_TM
Egr1	4.36e-28	0.31381	0.937	0.941	8.56e-24	TM2_vs_other_TM
Anxa1	4.68e-28	-0.62083	0.269	0.436	9.18e-24	TM3_vs_other_TM
Hgf	5.04e-28	0.536773	0.177	0.068	9.89e-24	TM3_vs_other_TM
Rps12	5.77e-28	-0.405329	0.761	0.856	1.13e-23	TM3_vs_other_TM
Spats2l	5.85e-28	0.497956	0.47	0.296	1.15e-23	TM1_vs_all_other_TM
Cox5b	6.01e-28	0.414206	0.791	0.732	1.18e-23	TM3_vs_other_TM
Gucy1b1	6.58e-28	0.368699	0.129	0.037	1.29e-23	TM2_vs_other_TM
Samhd1	8.73e-28	0.626787	0.326	0.182	1.72e-23	TM2_vs_other_TM
Ccn3	9.27e-28	0.541585	0.195	0.078	1.82e-23	TM1_vs_all_other_TM
S100a6	9.65e-28	-0.363809	0.978	0.989	1.9e-23	TM2_vs_other_TM
Hdlbp	9.69e-28	0.419038	0.524	0.339	1.9e-23	TM1_vs_all_other_TM
Lamb1	9.8e-28	0.524316	0.188	0.074	1.92e-23	TM2_vs_other_TM
Serping1	1.02e-27	-0.563091	0.623	0.742	1.99e-23	TM3_vs_other_TM
Cpq	1.28e-27	0.423826	0.514	0.328	2.52e-23	TM1_vs_all_other_TM
Fbln5	1.47e-27	-0.695816	0.27	0.427	2.89e-23	TM2_vs_other_TM
Tle4	1.71e-27	0.563963	0.43	0.285	3.36e-23	TM3_vs_other_TM
Crym	1.72e-27	-0.640984	0.042	0.154	3.38e-23	TM3_vs_other_TM
Gpx3	1.78e-27	0.873393	0.325	0.185	3.5e-23	TM1_vs_all_other_TM
Sostdc1	1.9e-27	-0.908971	0.075	0.211	3.74e-23	TM2_vs_other_TM
Actg1	1.92e-27	0.425655	0.84	0.786	3.77e-23	TM2_vs_other_TM
Ece1	1.95e-27	-0.574266	0.129	0.274	3.84e-23	TM3_vs_other_TM
Aspn	2.25e-27	-0.673474	0.091	0.225	4.42e-23	TM3_vs_other_TM
Iigp1	2.25e-27	0.768	0.248	0.122	4.43e-23	TM3_vs_other_TM
Dstn	2.36e-27	-0.574965	0.763	0.795	4.63e-23	TM1_vs_all_other_TM
Phlda1	2.5e-27	-0.668799	0.195	0.353	4.92e-23	TM3_vs_other_TM
Mgarp	2.66e-27	-0.993707	0.352	0.494	5.22e-23	TM3_vs_other_TM
Ikbip	2.77e-27	0.387144	0.344	0.186	5.45e-23	TM1_vs_all_other_TM
Tcea3	2.96e-27	0.421268	0.364	0.199	5.81e-23	TM1_vs_all_other_TM
Enho	2.99e-27	-0.553711	0.063	0.191	5.87e-23	TM1_vs_all_other_TM
Rplp0	3.42e-27	0.358256	0.928	0.863	6.71e-23	TM1_vs_all_other_TM
Amotl2	3.69e-27	-0.486236	0.061	0.182	7.24e-23	TM3_vs_other_TM
Nrp1	3.76e-27	-0.649779	0.32	0.462	7.38e-23	TM1_vs_all_other_TM
Tmem159	3.76e-27	0.561732	0.275	0.142	7.39e-23	TM2_vs_other_TM
Ndufb7	3.99e-27	0.506474	0.516	0.388	7.83e-23	TM3_vs_other_TM
Selenos	4.17e-27	-0.491342	0.436	0.599	8.19e-23	TM3_vs_other_TM
Arhgap1	4.41e-27	0.544991	0.196	0.085	8.67e-23	TM3_vs_other_TM
Kank1	4.74e-27	0.400386	0.207	0.086	9.3e-23	TM1_vs_all_other_TM
Fstl1	6.27e-27	-0.536361	0.364	0.543	1.23e-22	TM3_vs_other_TM
Calm1	6.54e-27	0.344928	0.896	0.844	1.28e-22	TM3_vs_other_TM
Rpl22	6.84e-27	-0.294736	0.907	0.928	1.34e-22	TM3_vs_other_TM
Piezo2	6.93e-27	-0.489456	0.049	0.162	1.36e-22	TM3_vs_other_TM
Csrp1	7.55e-27	0.607236	0.399	0.268	1.48e-22	TM3_vs_other_TM
Atp5md	7.8e-27	0.386528	0.79	0.711	1.53e-22	TM3_vs_other_TM
Ctsl	7.94e-27	-0.27335	0.856	0.911	1.56e-22	TM3_vs_other_TM
Frmd6	8.39e-27	0.468745	0.191	0.078	1.65e-22	TM2_vs_other_TM
Adamtsl1	9.35e-27	0.382946	0.115	0.031	1.84e-22	TM1_vs_all_other_TM
Ndufa11	9.77e-27	-0.5023	0.609	0.689	1.92e-22	TM1_vs_all_other_TM
Itm2b	9.94e-27	0.32665	0.982	0.973	1.95e-22	TM1_vs_all_other_TM
Myo1d	1.14e-26	0.307531	0.181	0.069	2.24e-22	TM1_vs_all_other_TM
Ppib	1.17e-26	-0.373249	0.8	0.857	2.31e-22	TM3_vs_other_TM
Myo1e	1.2e-26	0.314252	0.152	0.052	2.35e-22	TM1_vs_all_other_TM
H2-D1	1.31e-26	-0.548799	0.291	0.461	2.58e-22	TM3_vs_other_TM
Nexn	1.41e-26	-0.630663	0.087	0.221	2.76e-22	TM2_vs_other_TM
Ctnnal1	1.42e-26	-0.779085	0.176	0.323	2.78e-22	TM2_vs_other_TM
Oaz1	1.46e-26	-0.317356	0.913	0.923	2.86e-22	TM1_vs_all_other_TM
Serpinf1	1.52e-26	-0.989369	0.797	0.783	2.98e-22	TM2_vs_other_TM
Chst1	1.57e-26	-0.524162	0.049	0.166	3.08e-22	TM1_vs_all_other_TM
Rcn3	1.59e-26	-0.612209	0.313	0.471	3.12e-22	TM3_vs_other_TM
Znhit6	1.68e-26	0.36286	0.198	0.081	3.3e-22	TM1_vs_all_other_TM
Lama4	1.91e-26	0.440968	0.202	0.084	3.74e-22	TM1_vs_all_other_TM
Clic1	2.02e-26	0.4235	0.62	0.497	3.98e-22	TM3_vs_other_TM
Bhlhe41	2.21e-26	0.407938	0.176	0.067	4.35e-22	TM1_vs_all_other_TM
Gucy1a1	2.23e-26	-0.577744	0.056	0.176	4.38e-22	TM1_vs_all_other_TM
Sox9	2.46e-26	0.485656	0.179	0.071	4.83e-22	TM2_vs_other_TM
Ndufa4l2	2.52e-26	0.548085	0.21	0.091	4.95e-22	TM2_vs_other_TM
Ltbp3	2.66e-26	-0.563894	0.27	0.439	5.23e-22	TM3_vs_other_TM
Ctsf	2.86e-26	-0.450693	0.101	0.237	5.62e-22	TM3_vs_other_TM
Adamtsl3	2.86e-26	-0.472099	0.063	0.182	5.63e-22	TM3_vs_other_TM
Rnase4	2.89e-26	-0.472341	0.12	0.263	5.68e-22	TM3_vs_other_TM
Sdc4	3.46e-26	0.464152	0.618	0.449	6.8e-22	TM1_vs_all_other_TM
Foxo1	3.55e-26	0.33819	0.165	0.06	6.97e-22	TM1_vs_all_other_TM
Gmds	3.65e-26	0.562568	0.265	0.143	7.17e-22	TM3_vs_other_TM
Adamts2	3.73e-26	-0.41842	0.09	0.226	7.32e-22	TM3_vs_other_TM
Plat	4.39e-26	-0.551418	0.142	0.289	8.62e-22	TM3_vs_other_TM
Ndufa3	5.16e-26	0.460439	0.669	0.562	1.01e-21	TM3_vs_other_TM
Gm15867	5.24e-26	0.328934	0.185	0.073	1.03e-21	TM1_vs_all_other_TM
Tmem204	5.36e-26	-0.357329	0.039	0.146	1.05e-21	TM3_vs_other_TM
Rps23	5.45e-26	-0.300561	0.888	0.914	1.07e-21	TM3_vs_other_TM
Prss23	5.45e-26	0.37597	0.287	0.142	1.07e-21	TM1_vs_all_other_TM
Stk17b	5.99e-26	-0.549048	0.093	0.222	1.18e-21	TM3_vs_other_TM
Twist1	6.21e-26	-0.47913	0.24	0.404	1.22e-21	TM3_vs_other_TM
Bambi	6.19e-26	-0.973063	0.219	0.359	1.22e-21	TM1_vs_all_other_TM
Glul	6.64e-26	-0.491541	0.291	0.46	1.3e-21	TM3_vs_other_TM
Nedd9	6.63e-26	0.356082	0.135	0.044	1.3e-21	TM1_vs_all_other_TM
Ifit3	7.43e-26	0.782424	0.158	0.057	1.46e-21	TM2_vs_other_TM
Col23a1	7.57e-26	-0.640302	0.176	0.326	1.49e-21	TM2_vs_other_TM
Gng5	7.58e-26	0.286747	0.95	0.911	1.49e-21	TM3_vs_other_TM
Edn3	8.46e-26	-0.806496	0.314	0.446	1.66e-21	TM3_vs_other_TM
Spry1	1.02e-25	0.525354	0.216	0.098	2e-21	TM2_vs_other_TM
Clec11a	1.09e-25	-0.662875	0.125	0.267	2.15e-21	TM2_vs_other_TM
Pnp	1.26e-25	0.659485	0.408	0.269	2.48e-21	TM2_vs_other_TM
Rpl13	1.32e-25	0.279014	0.975	0.97	2.59e-21	TM2_vs_other_TM
Kazald1	1.35e-25	-0.460809	0.118	0.258	2.66e-21	TM3_vs_other_TM
Lamb2	1.36e-25	0.450944	0.455	0.281	2.67e-21	TM1_vs_all_other_TM
Gpx1	1.43e-25	0.55147	0.685	0.59	2.81e-21	TM3_vs_other_TM
Gpm6b	1.54e-25	-0.438458	0.059	0.175	3.02e-21	TM3_vs_other_TM
Ptpn13	1.65e-25	0.346513	0.208	0.09	3.24e-21	TM1_vs_all_other_TM
Ccn3	1.72e-25	-0.580931	0.038	0.151	3.38e-21	TM2_vs_other_TM
Bace2	1.74e-25	0.358891	0.207	0.089	3.43e-21	TM1_vs_all_other_TM
Sgk1	1.84e-25	-0.512751	0.211	0.37	3.61e-21	TM3_vs_other_TM
Ddah2	1.88e-25	-0.606895	0.296	0.431	3.69e-21	TM1_vs_all_other_TM
Igfbp4	1.93e-25	-0.802802	0.624	0.689	3.78e-21	TM1_vs_all_other_TM
Rarb	2.19e-25	-0.460718	0.055	0.173	4.3e-21	TM1_vs_all_other_TM
Fkbp7	2.2e-25	-0.514505	0.212	0.373	4.32e-21	TM3_vs_other_TM
Gas5	2.26e-25	0.39202	0.777	0.62	4.44e-21	TM1_vs_all_other_TM
Tle1	2.62e-25	0.530648	0.241	0.122	5.14e-21	TM3_vs_other_TM
Tle1	2.88e-25	-0.562235	0.082	0.206	5.65e-21	TM1_vs_all_other_TM
1200007C13Rik	3.14e-25	-0.717165	0.068	0.189	6.17e-21	TM1_vs_all_other_TM
Igsf3	3.18e-25	0.455561	0.157	0.058	6.24e-21	TM2_vs_other_TM
Tgm2	3.34e-25	0.559391	0.248	0.127	6.56e-21	TM3_vs_other_TM
Itih5	3.43e-24	0.344521	0.363	0.278	6.86e-21	All_TM_vs_all_other_cells
Olfml3	3.53e-24	0.385601	0.378	0.301	7.06e-21	All_TM_vs_all_other_cells
Crip2	3.69e-25	-0.453622	0.132	0.276	7.25e-21	TM3_vs_other_TM
Dnajb1	3.96e-25	-0.619781	0.318	0.484	7.77e-21	TM3_vs_other_TM
Hip1	4.35e-25	0.32559	0.175	0.068	8.54e-21	TM1_vs_all_other_TM
C1ra	4.57e-25	-0.47199	0.139	0.286	8.98e-21	TM3_vs_other_TM
Rps4x	5.04e-25	0.271473	0.972	0.969	9.9e-21	TM2_vs_other_TM
Copz2	5.28e-25	0.398521	0.504	0.328	1.04e-20	TM1_vs_all_other_TM
Rpl18a	5.38e-25	-0.266864	0.927	0.94	1.06e-20	TM3_vs_other_TM
Fgfr3	5.84e-25	0.526078	0.278	0.152	1.15e-20	TM3_vs_other_TM
Strbp	6.3e-25	0.348521	0.167	0.064	1.24e-20	TM1_vs_all_other_TM
Dusp1	6.44e-25	0.533293	0.673	0.551	1.27e-20	TM2_vs_other_TM
Lox	6.5e-25	-0.461194	0.083	0.208	1.28e-20	TM3_vs_other_TM
Maff	6.72e-25	-0.457408	0.069	0.189	1.32e-20	TM3_vs_other_TM
Ergic3	6.99e-25	0.473222	0.499	0.332	1.37e-20	TM1_vs_all_other_TM
Rgs16	7.01e-25	-0.748622	0.143	0.289	1.38e-20	TM2_vs_other_TM
H2afz	7.03e-25	0.392346	0.795	0.715	1.38e-20	TM3_vs_other_TM
Dach1	7.06e-25	0.363477	0.138	0.045	1.39e-20	TM2_vs_other_TM
Jph4	7.23e-25	0.292311	0.11	0.03	1.42e-20	TM1_vs_all_other_TM
Wls	7.4e-25	-0.498593	0.348	0.509	1.45e-20	TM2_vs_other_TM
Col16a1	8.16e-25	-0.692992	0.226	0.37	1.6e-20	TM2_vs_other_TM
Dmpk	1.06e-24	-0.592161	0.072	0.19	2.07e-20	TM1_vs_all_other_TM
Hmgn1	1.06e-24	0.406003	0.718	0.64	2.08e-20	TM3_vs_other_TM
Dcn	1.14e-24	-0.897933	0.956	0.958	2.24e-20	TM2_vs_other_TM
Tm4sf1	1.15e-24	0.535697	0.261	0.132	2.27e-20	TM2_vs_other_TM
Lgals3	1.25e-24	0.358879	0.147	0.052	2.46e-20	TM1_vs_all_other_TM
Gstt1	1.28e-24	-0.616906	0.159	0.294	2.52e-20	TM1_vs_all_other_TM
Gapdh	1.41e-24	-0.428338	0.73	0.777	2.77e-20	TM1_vs_all_other_TM
Pitx2	1.49e-24	-0.472317	0.541	0.678	2.94e-20	TM2_vs_other_TM
Cilp2	1.65e-24	-0.642638	0.024	0.125	3.24e-20	TM2_vs_other_TM
Mgst3	1.71e-24	0.517913	0.238	0.123	3.36e-20	TM3_vs_other_TM
Rps8	1.72e-24	0.288213	0.96	0.949	3.38e-20	TM2_vs_other_TM
Jam2	1.92e-24	0.330138	0.178	0.072	3.78e-20	TM1_vs_all_other_TM
Tcf4	2.13e-24	0.528231	0.735	0.652	4.18e-20	TM2_vs_other_TM
Arpc1b	2.16e-24	0.48425	0.62	0.481	4.25e-20	TM2_vs_other_TM
Rpsa	2.21e-24	-0.285369	0.929	0.951	4.34e-20	TM3_vs_other_TM
Tln2	2.68e-24	0.44418	0.225	0.105	5.26e-20	TM2_vs_other_TM
Pnp	2.71e-24	-0.501087	0.216	0.367	5.32e-20	TM3_vs_other_TM
Fbln7	2.74e-24	-0.485358	0.046	0.154	5.38e-20	TM1_vs_all_other_TM
Hsp90b1	2.93e-24	-0.44798	0.646	0.763	5.76e-20	TM3_vs_other_TM
Ndufa7	3.06e-24	0.382647	0.792	0.729	6.01e-20	TM3_vs_other_TM
Id1	3.06e-24	0.4679	0.366	0.214	6.02e-20	TM1_vs_all_other_TM
Jag1	3.08e-24	0.450788	0.173	0.069	6.05e-20	TM2_vs_other_TM
Svep1	3.5e-24	-0.628002	0.071	0.195	6.87e-20	TM2_vs_other_TM
Ptgs2	3.73e-23	0.365379	0.321	0.252	7.46e-20	All_TM_vs_all_other_cells
Herpud1	3.89e-24	0.467765	0.503	0.338	7.63e-20	TM1_vs_all_other_TM
Lama2	3.9e-24	0.534852	0.367	0.225	7.65e-20	TM2_vs_other_TM
Sec31a	3.96e-24	0.348221	0.309	0.163	7.78e-20	TM1_vs_all_other_TM
Ncam1	4.04e-24	-0.54431	0.387	0.537	7.93e-20	TM2_vs_other_TM
C1qtnf12	4.46e-24	-0.458931	0.057	0.174	8.76e-20	TM2_vs_other_TM
Angpt1	4.67e-24	-0.47365	0.151	0.296	9.17e-20	TM3_vs_other_TM
H2-Q4	4.78e-24	0.455725	0.213	0.097	9.39e-20	TM2_vs_other_TM
Romo1	4.94e-24	0.363423	0.808	0.744	9.69e-20	TM3_vs_other_TM
Comp	5.06e-23	0.265899	0.249	0.191	1.01e-19	All_TM_vs_all_other_cells
Tpm2	5.51e-24	-0.780026	0.338	0.444	1.08e-19	TM1_vs_all_other_TM
Zfp462	5.77e-24	0.323868	0.175	0.07	1.13e-19	TM1_vs_all_other_TM
Ctxn3	5.99e-24	0.731941	0.336	0.21	1.18e-19	TM3_vs_other_TM
Fibin	6.11e-24	0.416998	0.122	0.039	1.2e-19	TM1_vs_all_other_TM
Ncald	6.27e-24	-0.666409	0.157	0.297	1.23e-19	TM2_vs_other_TM
Pls3	6.25e-24	0.353025	0.342	0.19	1.23e-19	TM1_vs_all_other_TM
Pdpn	6.81e-24	0.370993	0.273	0.137	1.34e-19	TM1_vs_all_other_TM
Mfge8	7.17e-24	0.390525	0.309	0.166	1.41e-19	TM1_vs_all_other_TM
Cemip	8.35e-24	-0.548386	0.037	0.143	1.64e-19	TM2_vs_other_TM
Enpp1	8.86e-24	0.443807	0.178	0.074	1.74e-19	TM2_vs_other_TM
Cemip2	8.95e-24	0.37961	0.163	0.064	1.76e-19	TM1_vs_all_other_TM
Ephb6	9.92e-24	0.284061	0.165	0.064	1.95e-19	TM1_vs_all_other_TM
Tmem59	1.04e-23	0.375616	0.671	0.516	2.05e-19	TM1_vs_all_other_TM
Atp1b1	1.05e-23	-0.636743	0.029	0.12	2.07e-19	TM3_vs_other_TM
Prdx1	1.07e-23	-0.35909	0.839	0.864	2.09e-19	TM1_vs_all_other_TM
Glul	1.17e-23	0.429128	0.513	0.343	2.29e-19	TM1_vs_all_other_TM
Prrc1	1.18e-23	0.367292	0.273	0.138	2.31e-19	TM1_vs_all_other_TM
Boc	1.44e-23	-0.475723	0.09	0.213	2.82e-19	TM3_vs_other_TM
Atpif1	1.47e-23	0.381179	0.772	0.705	2.89e-19	TM3_vs_other_TM
Vim	1.55e-23	0.302329	0.826	0.723	3.05e-19	TM3_vs_other_TM
Cebpb	1.63e-23	0.597602	0.594	0.462	3.21e-19	TM2_vs_other_TM
Ckb	1.62e-22	0.251029	0.481	0.475	3.24e-19	All_TM_vs_all_other_cells
Uqcrq	1.68e-23	0.411843	0.728	0.657	3.3e-19	TM3_vs_other_TM
Rab3ip	1.85e-23	0.318563	0.105	0.029	3.63e-19	TM1_vs_all_other_TM
Lbh	1.85e-23	0.500409	0.171	0.074	3.64e-19	TM3_vs_other_TM
Cr1l	1.87e-23	0.364808	0.205	0.092	3.67e-19	TM1_vs_all_other_TM
Rps5	2.08e-23	0.305817	0.924	0.909	4.09e-19	TM2_vs_other_TM
Flna	2.36e-23	-0.685561	0.28	0.406	4.63e-19	TM1_vs_all_other_TM
Hmgb1	2.39e-23	0.309317	0.884	0.845	4.69e-19	TM3_vs_other_TM
Vim	2.4e-23	-0.430679	0.67	0.801	4.72e-19	TM2_vs_other_TM
Hint1	2.65e-23	0.331023	0.848	0.808	5.21e-19	TM3_vs_other_TM
Mfap5	2.73e-22	0.362939	0.345	0.279	5.46e-19	All_TM_vs_all_other_cells
Mustn1	3.13e-23	-0.673983	0.081	0.194	6.16e-19	TM1_vs_all_other_TM
Thbs2	3.28e-23	-0.846026	0.198	0.335	6.45e-19	TM2_vs_other_TM
Nav1	3.28e-23	-0.450112	0.144	0.285	6.45e-19	TM3_vs_other_TM
Cyp26b1	3.88e-23	-0.757172	0.029	0.129	7.62e-19	TM2_vs_other_TM
Apod	4.04e-23	-0.572481	0.516	0.663	7.94e-19	TM2_vs_other_TM
Rps9	4.37e-23	0.318415	0.911	0.887	8.58e-19	TM2_vs_other_TM
Cpne2	4.47e-23	0.419436	0.148	0.058	8.79e-19	TM3_vs_other_TM
Cox7a2	5.11e-23	0.327962	0.806	0.762	1e-18	TM3_vs_other_TM
Tnfaip8	5.26e-23	-0.398722	0.065	0.187	1.03e-18	TM2_vs_other_TM
Svil	5.74e-23	0.415034	0.644	0.483	1.13e-18	TM1_vs_all_other_TM
Cdh11	6.05e-23	0.464821	0.614	0.487	1.19e-18	TM2_vs_other_TM
Atp5g2	6.05e-23	0.321943	0.854	0.79	1.19e-18	TM3_vs_other_TM
Cped1	6.23e-23	0.474733	0.731	0.663	1.22e-18	TM2_vs_other_TM
Col5a1	6.3e-23	0.398301	0.332	0.189	1.24e-18	TM1_vs_all_other_TM
Atp1a2	6.49e-23	-0.616734	0.116	0.242	1.27e-18	TM1_vs_all_other_TM
Igsf10	6.94e-23	-0.42709	0.067	0.179	1.36e-18	TM3_vs_other_TM
Mettl1	6.96e-23	0.318458	0.192	0.083	1.37e-18	TM1_vs_all_other_TM
Bpifb1	7.29e-23	-0.786144	0.014	0.1	1.43e-18	TM2_vs_other_TM
Tgfbr2	7.42e-23	-0.437288	0.19	0.34	1.46e-18	TM3_vs_other_TM
Cx3cl1	7.41e-23	0.396973	0.184	0.08	1.46e-18	TM1_vs_all_other_TM
Nr4a1	7.51e-23	0.478947	0.691	0.598	1.48e-18	TM3_vs_other_TM
Tspo	7.71e-23	-0.42438	0.648	0.721	1.51e-18	TM1_vs_all_other_TM
Pmepa1	8.09e-23	0.416761	0.706	0.554	1.59e-18	TM1_vs_all_other_TM
Tnfaip8	8.23e-23	0.304547	0.232	0.109	1.62e-18	TM1_vs_all_other_TM
Fxyd6	8.52e-23	0.416443	0.326	0.186	1.67e-18	TM1_vs_all_other_TM
Hgf	8.65e-23	-0.54832	0.04	0.141	1.7e-18	TM1_vs_all_other_TM
Angpt1	8.87e-23	0.547036	0.337	0.202	1.74e-18	TM2_vs_other_TM
Fkbp10	8.92e-23	0.312732	0.184	0.078	1.75e-18	TM1_vs_all_other_TM
Gmds	9.32e-23	-0.5914	0.108	0.226	1.83e-18	TM1_vs_all_other_TM
Pdia4	9.77e-23	0.441615	0.336	0.194	1.92e-18	TM1_vs_all_other_TM
Cemip	1.01e-22	0.445421	0.173	0.074	1.99e-18	TM3_vs_other_TM
Thbd	1.03e-22	-0.624674	0.095	0.215	2.03e-18	TM1_vs_all_other_TM
Ubl5	1.05e-22	0.351016	0.805	0.746	2.07e-18	TM3_vs_other_TM
Plekhh2	1.21e-22	0.442641	0.164	0.07	2.37e-18	TM3_vs_other_TM
Nid1	1.45e-22	-0.946817	0.217	0.331	2.85e-18	TM1_vs_all_other_TM
Tshz2	1.52e-22	0.499228	0.431	0.3	2.99e-18	TM3_vs_other_TM
Elob	1.62e-22	-0.298451	0.892	0.938	3.17e-18	TM2_vs_other_TM
Flrt2	1.67e-22	0.316469	0.168	0.069	3.29e-18	TM1_vs_all_other_TM
Irgm1	1.82e-22	-0.601259	0.07	0.18	3.58e-18	TM1_vs_all_other_TM
Plekha4	1.84e-22	-0.502724	0.044	0.144	3.61e-18	TM1_vs_all_other_TM
Tgfb1	1.89e-22	-0.487187	0.09	0.209	3.72e-18	TM3_vs_other_TM
Hpgd	2.09e-22	0.488815	0.215	0.104	4.11e-18	TM2_vs_other_TM
Cfl1	2.16e-22	0.466499	0.606	0.512	4.25e-18	TM3_vs_other_TM
Klf9	2.54e-22	0.49115	0.54	0.41	4.98e-18	TM2_vs_other_TM
Fzd5	2.58e-22	0.269423	0.135	0.048	5.06e-18	TM1_vs_all_other_TM
Ctxn3	2.76e-22	-0.648376	0.159	0.299	5.42e-18	TM2_vs_other_TM
Plk2	2.81e-22	0.46463	0.271	0.145	5.53e-18	TM1_vs_all_other_TM
Atp5md	2.84e-22	-0.370625	0.659	0.775	5.59e-18	TM2_vs_other_TM
Neat1	2.88e-22	-0.596852	0.18	0.319	5.65e-18	TM3_vs_other_TM
Sparcl1	2.95e-22	0.729304	0.188	0.085	5.79e-18	TM2_vs_other_TM
Nid1	3.28e-22	-0.803819	0.2	0.335	6.44e-18	TM2_vs_other_TM
Cav1	3.43e-22	0.437551	0.142	0.056	6.73e-18	TM3_vs_other_TM
Rpl12	3.45e-22	-0.410121	0.442	0.595	6.78e-18	TM3_vs_other_TM
Plp2	3.54e-22	0.298467	0.18	0.076	6.96e-18	TM1_vs_all_other_TM
Cxadr	3.54e-22	0.42956	0.125	0.043	6.96e-18	TM1_vs_all_other_TM
Alpl	3.73e-22	-0.609335	0.051	0.15	7.33e-18	TM3_vs_other_TM
Efna5	3.75e-22	-0.403122	0.034	0.133	7.37e-18	TM2_vs_other_TM
Ifit1	3.8e-22	0.735317	0.173	0.075	7.46e-18	TM2_vs_other_TM
Zbtb20	3.8e-22	0.488412	0.7	0.61	7.47e-18	TM2_vs_other_TM
Csrp2	3.92e-22	0.642792	0.432	0.313	7.69e-18	TM3_vs_other_TM
Pdia6	4.11e-22	0.433154	0.572	0.411	8.07e-18	TM1_vs_all_other_TM
Mettl1	4.19e-22	-0.343097	0.053	0.157	8.22e-18	TM3_vs_other_TM
Cdc42ep3	4.41e-22	0.302708	0.158	0.062	8.65e-18	TM1_vs_all_other_TM
Mpp6	5.17e-22	-0.405896	0.082	0.197	1.02e-17	TM3_vs_other_TM
Cmbl	5.27e-22	-0.521335	0.033	0.131	1.03e-17	TM2_vs_other_TM
P4ha1	5.77e-22	-0.449722	0.198	0.345	1.13e-17	TM3_vs_other_TM
Cdc42ep3	6.65e-22	-0.36345	0.035	0.127	1.31e-17	TM3_vs_other_TM
Ntn1	6.69e-22	-0.479946	0.051	0.15	1.31e-17	TM3_vs_other_TM
Clic1	7.21e-22	-0.437242	0.466	0.579	1.42e-17	TM1_vs_all_other_TM
Cracr2b	7.24e-22	0.303989	0.168	0.069	1.42e-17	TM1_vs_all_other_TM
Fxyd1	7.37e-22	-0.420979	0.567	0.695	1.45e-17	TM2_vs_other_TM
Calr	7.41e-22	0.422909	0.453	0.293	1.46e-17	TM1_vs_all_other_TM
Hspg2	7.54e-22	-0.51755	0.141	0.276	1.48e-17	TM2_vs_other_TM
Gadd45b	8.27e-22	0.555257	0.682	0.584	1.62e-17	TM2_vs_other_TM
Fgl2	8.22e-21	0.352695	0.338	0.276	1.64e-17	All_TM_vs_all_other_cells
Maob	8.52e-22	0.422308	0.172	0.076	1.67e-17	TM3_vs_other_TM
C4b	8.57e-22	-0.494504	0.202	0.345	1.68e-17	TM1_vs_all_other_TM
S100a10	8.95e-22	-0.578752	0.436	0.562	1.76e-17	TM3_vs_other_TM
Ccn2	9.02e-22	-0.807421	0.594	0.671	1.77e-17	TM1_vs_all_other_TM
Egr1	9.39e-22	-0.291995	0.94	0.94	1.84e-17	TM1_vs_all_other_TM
Pwwp3b	9.89e-22	-0.441999	0.034	0.128	1.94e-17	TM1_vs_all_other_TM
Zeb2	1.02e-21	0.492555	0.305	0.186	2e-17	TM3_vs_other_TM
Dap	1.2e-21	-0.408596	0.152	0.288	2.37e-17	TM3_vs_other_TM
Cntfr	1.21e-21	-0.436713	0.052	0.156	2.38e-17	TM1_vs_all_other_TM
Cpne8	1.23e-21	-0.592885	0.11	0.228	2.42e-17	TM1_vs_all_other_TM
Tmem204	1.37e-21	0.272481	0.175	0.074	2.69e-17	TM1_vs_all_other_TM
Enpp1	1.46e-21	-0.403744	0.045	0.141	2.86e-17	TM3_vs_other_TM
Scarb2	1.56e-21	-0.578701	0.204	0.331	3.06e-17	TM1_vs_all_other_TM
Ntf3	1.57e-21	0.498977	0.193	0.093	3.08e-17	TM3_vs_other_TM
Ly6e	1.59e-21	-0.469936	0.071	0.178	3.11e-17	TM3_vs_other_TM
Slc6a6	1.61e-21	0.452227	0.748	0.614	3.16e-17	TM1_vs_all_other_TM
Nucb1	1.72e-21	0.321631	0.324	0.181	3.37e-17	TM1_vs_all_other_TM
Actn1	1.75e-21	-0.530009	0.179	0.316	3.44e-17	TM2_vs_other_TM
Rgs16	1.8e-21	-0.845407	0.161	0.284	3.54e-17	TM1_vs_all_other_TM
Ctsk	1.85e-21	-0.588885	0.329	0.473	3.63e-17	TM3_vs_other_TM
Myo10	1.88e-21	0.302449	0.169	0.07	3.7e-17	TM1_vs_all_other_TM
Aebp1	1.89e-21	-0.669721	0.472	0.563	3.71e-17	TM2_vs_other_TM
Fbln1	1.91e-21	0.326558	0.617	0.46	3.75e-17	TM2_vs_other_TM
Lama4	1.91e-21	-0.412701	0.057	0.16	3.75e-17	TM3_vs_other_TM
Gdf10	1.98e-21	0.487452	0.178	0.079	3.89e-17	TM2_vs_other_TM
Inmt	2.03e-21	-0.75283	0.07	0.173	3.99e-17	TM3_vs_other_TM
P4hb	2.06e-21	0.372683	0.406	0.252	4.06e-17	TM1_vs_all_other_TM
Ptms	2.15e-21	0.373803	0.737	0.668	4.22e-17	TM3_vs_other_TM
Rbms3	2.38e-21	0.488358	0.261	0.144	4.67e-17	TM2_vs_other_TM
Colec12	2.45e-21	-0.613389	0.401	0.505	4.8e-17	TM1_vs_all_other_TM
Prdx4	2.61e-21	-0.489546	0.375	0.511	5.13e-17	TM2_vs_other_TM
Son	2.73e-21	-0.325894	0.848	0.857	5.36e-17	TM1_vs_all_other_TM
Il1r1	2.73e-21	-0.329443	0.028	0.113	5.37e-17	TM3_vs_other_TM
Cachd1	2.73e-21	0.337996	0.151	0.06	5.37e-17	TM1_vs_all_other_TM
Acta2	2.82e-21	-1.87877	0.354	0.426	5.54e-17	TM1_vs_all_other_TM
Ndufc1	2.86e-21	0.370147	0.778	0.717	5.61e-17	TM3_vs_other_TM
Atp1a1	2.94e-21	0.459003	0.371	0.229	5.77e-17	TM1_vs_all_other_TM
Srgn	2.9e-20	-0.259714	0.195	0.282	5.79e-17	All_TM_vs_all_other_cells
Ndrg2	3.44e-21	0.491064	0.255	0.143	6.76e-17	TM3_vs_other_TM
Hacd4	4.17e-21	0.525838	0.272	0.161	8.2e-17	TM3_vs_other_TM
Smpdl3a	4.49e-21	0.331879	0.201	0.094	8.82e-17	TM1_vs_all_other_TM
Mxra7	4.53e-21	0.324848	0.618	0.461	8.9e-17	TM1_vs_all_other_TM
Vegfb	4.63e-21	-0.526767	0.125	0.244	9.09e-17	TM1_vs_all_other_TM
Ppp1r2	4.96e-21	-0.628367	0.354	0.461	9.73e-17	TM1_vs_all_other_TM
Fosb	4.97e-21	-0.323341	0.818	0.883	9.76e-17	TM3_vs_other_TM
Tpcn1	5.52e-21	0.396256	0.219	0.108	1.09e-16	TM2_vs_other_TM
Man2b1	6.06e-21	0.323545	0.184	0.082	1.19e-16	TM1_vs_all_other_TM
Adamts2	6.28e-21	0.349561	0.26	0.136	1.23e-16	TM1_vs_all_other_TM
Hbegf	6.87e-21	0.52425	0.25	0.134	1.35e-16	TM1_vs_all_other_TM
Gpc4	7.41e-21	-0.371631	0.037	0.127	1.45e-16	TM3_vs_other_TM
Igsf10	7.64e-21	0.373161	0.211	0.102	1.5e-16	TM1_vs_all_other_TM
Mmp2	7.56e-20	0.318932	0.347	0.281	1.51e-16	All_TM_vs_all_other_cells
Edf1	7.69e-21	0.32835	0.777	0.71	1.51e-16	TM3_vs_other_TM
Ext1	7.75e-21	0.330612	0.211	0.102	1.52e-16	TM1_vs_all_other_TM
Sod3	7.85e-21	-0.48719	0.098	0.219	1.54e-16	TM2_vs_other_TM
E130114P18Rik	7.94e-21	0.332124	0.12	0.042	1.56e-16	TM2_vs_other_TM
Aqp1	8.07e-21	-0.628537	0.299	0.438	1.58e-16	TM3_vs_other_TM
4921524J17Rik	8.23e-21	0.380967	0.274	0.148	1.62e-16	TM1_vs_all_other_TM
Wwtr1	1.01e-20	-0.372079	0.124	0.251	1.99e-16	TM3_vs_other_TM
Cxcl12	1.04e-20	0.306543	0.708	0.524	2.03e-16	TM2_vs_other_TM
Kcnk2	1.08e-20	-0.350653	0.025	0.106	2.12e-16	TM3_vs_other_TM
Gsn	1.1e-20	0.425035	0.804	0.664	2.16e-16	TM1_vs_all_other_TM
Col8a2	1.16e-20	-0.679018	0.311	0.436	2.28e-16	TM3_vs_other_TM
Spats2l	1.16e-20	-0.555386	0.26	0.394	2.29e-16	TM2_vs_other_TM
Ddit4	1.23e-20	0.424805	0.134	0.052	2.41e-16	TM3_vs_other_TM
Atf3	1.24e-20	-0.527682	0.647	0.739	2.43e-16	TM1_vs_all_other_TM
Nuak1	1.25e-20	-0.316131	0.027	0.108	2.45e-16	TM3_vs_other_TM
Crispld2	1.27e-20	-0.612867	0.406	0.519	2.49e-16	TM1_vs_all_other_TM
H2-Q4	1.3e-20	-0.536742	0.063	0.166	2.55e-16	TM1_vs_all_other_TM
Gstm1	1.3e-20	-0.622223	0.245	0.359	2.56e-16	TM1_vs_all_other_TM
Itgbl1	1.34e-20	-0.631962	0.253	0.386	2.64e-16	TM2_vs_other_TM
Cxcl16	1.43e-20	0.403324	0.184	0.085	2.82e-16	TM2_vs_other_TM
Sumo2	1.59e-20	0.31886	0.828	0.78	3.13e-16	TM3_vs_other_TM
Siva1	1.64e-20	0.467874	0.552	0.457	3.22e-16	TM3_vs_other_TM
Cox4i1	1.69e-20	-0.366681	0.768	0.813	3.32e-16	TM1_vs_all_other_TM
Zmat5	1.7e-20	0.475114	0.313	0.2	3.33e-16	TM3_vs_other_TM
Zfp36l1	1.81e-20	0.44364	0.612	0.49	3.55e-16	TM2_vs_other_TM
Eya2	1.94e-20	-0.573055	0.122	0.237	3.81e-16	TM1_vs_all_other_TM
Sema5a	2e-20	-0.374463	0.02	0.104	3.93e-16	TM2_vs_other_TM
Ptch1	2.03e-20	0.462661	0.165	0.072	3.99e-16	TM2_vs_other_TM
Lamb1	2.16e-20	-0.458934	0.045	0.14	4.24e-16	TM1_vs_all_other_TM
Fbln2	2.21e-20	0.436656	0.164	0.07	4.35e-16	TM1_vs_all_other_TM
Scx	2.28e-20	-0.362182	0.018	0.1	4.47e-16	TM2_vs_other_TM
Fndc3b	2.35e-20	-0.371185	0.098	0.215	4.62e-16	TM3_vs_other_TM
Aldh1a1	2.38e-20	0.296894	0.146	0.059	4.67e-16	TM1_vs_all_other_TM
Oasl2	2.43e-20	0.310049	0.13	0.048	4.78e-16	TM2_vs_other_TM
Jun	2.44e-20	-0.284478	0.923	0.945	4.79e-16	TM3_vs_other_TM
Mrps6	2.47e-20	-0.439795	0.505	0.61	4.86e-16	TM1_vs_all_other_TM
Snhg18	2.6e-20	0.377816	0.617	0.463	5.12e-16	TM1_vs_all_other_TM
Thsd4	2.79e-20	0.353596	0.146	0.059	5.49e-16	TM1_vs_all_other_TM
Gm42418	2.85e-20	-0.277618	0.993	0.992	5.59e-16	TM1_vs_all_other_TM
Atp5g3	3.05e-20	0.41225	0.586	0.489	5.99e-16	TM3_vs_other_TM
Plxna2	3.47e-20	-0.590418	0.147	0.273	6.81e-16	TM2_vs_other_TM
Plxna2	3.56e-20	0.476336	0.309	0.191	6.99e-16	TM3_vs_other_TM
Rbp4	3.54e-19	0.276974	0.278	0.143	7.08e-16	All_TM_vs_all_other_cells
Lox	3.98e-20	0.31	0.241	0.124	7.82e-16	TM1_vs_all_other_TM
Hsph1	4.46e-20	-0.478594	0.108	0.221	8.77e-16	TM3_vs_other_TM
Cystm1	4.62e-20	0.343559	0.138	0.054	9.08e-16	TM2_vs_other_TM
Slc4a4	4.85e-20	-0.39844	0.04	0.128	9.54e-16	TM3_vs_other_TM
Cdc42ep4	4.9e-20	0.479635	0.23	0.126	9.63e-16	TM3_vs_other_TM
Tpt1	5.18e-20	0.267025	0.964	0.952	1.02e-15	TM2_vs_other_TM
Ssr4	5.19e-20	-0.395852	0.546	0.665	1.02e-15	TM3_vs_other_TM
Lrig3	5.86e-20	0.34864	0.287	0.16	1.15e-15	TM1_vs_all_other_TM
Htra3	6.02e-20	0.319489	0.101	0.032	1.18e-15	TM2_vs_other_TM
Dnajc3	6.14e-20	-0.407042	0.364	0.524	1.21e-15	TM3_vs_other_TM
Rerg	6.19e-20	0.394116	0.344	0.209	1.22e-15	TM1_vs_all_other_TM
Chpf	6.47e-20	0.393568	0.351	0.216	1.27e-15	TM1_vs_all_other_TM
Psca	7.14e-19	-0.282876	0.163	0.293	1.43e-15	All_TM_vs_all_other_cells
Ednra	7.61e-20	-0.435318	0.105	0.219	1.5e-15	TM3_vs_other_TM
Anpep	7.8e-20	0.398639	0.21	0.104	1.53e-15	TM2_vs_other_TM
Fdps	8.02e-20	-0.446167	0.045	0.142	1.58e-15	TM2_vs_other_TM
Rspo2	8.36e-20	-0.488225	0.053	0.152	1.64e-15	TM2_vs_other_TM
Gpc6	8.64e-20	0.345192	0.382	0.236	1.7e-15	TM1_vs_all_other_TM
Slc25a4	8.74e-20	-0.325905	0.8	0.868	1.72e-15	TM2_vs_other_TM
Lgals1	8.97e-20	-0.392561	0.734	0.821	1.76e-15	TM2_vs_other_TM
Arhgap20	8.99e-20	0.318758	0.216	0.107	1.77e-15	TM1_vs_all_other_TM
Sod3	9.15e-20	0.461792	0.261	0.144	1.8e-15	TM1_vs_all_other_TM
Calm3	9.72e-20	0.436844	0.512	0.407	1.91e-15	TM3_vs_other_TM
4931406P16Rik	1.02e-19	0.306548	0.165	0.072	2e-15	TM1_vs_all_other_TM
Fkbp9	1.03e-19	-0.559681	0.252	0.377	2.01e-15	TM2_vs_other_TM
Klf6	1.02e-19	-0.623205	0.267	0.409	2.01e-15	TM3_vs_other_TM
Tns3	1.04e-19	-0.393296	0.073	0.183	2.04e-15	TM2_vs_other_TM
Thbd	1.06e-19	0.586894	0.242	0.137	2.09e-15	TM3_vs_other_TM
Ppp1r15a	1.09e-19	0.429	0.724	0.654	2.13e-15	TM2_vs_other_TM
Tmsb10	1.1e-19	-0.387851	0.968	0.977	2.15e-15	TM2_vs_other_TM
Lamc1	1.11e-19	0.426984	0.251	0.136	2.17e-15	TM2_vs_other_TM
Dtd1	1.11e-19	0.533903	0.287	0.182	2.18e-15	TM3_vs_other_TM
Sec31a	1.15e-19	-0.390973	0.132	0.256	2.25e-15	TM3_vs_other_TM
Gadd45g	1.25e-19	0.756879	0.521	0.407	2.45e-15	TM2_vs_other_TM
Tspo	1.26e-19	0.334039	0.754	0.664	2.48e-15	TM3_vs_other_TM
Cd59a	1.3e-19	-0.438116	0.063	0.166	2.55e-15	TM2_vs_other_TM
Cthrc1	1.37e-19	0.296083	0.158	0.068	2.69e-15	TM1_vs_all_other_TM
Atp5k	1.43e-19	-0.334073	0.625	0.743	2.8e-15	TM2_vs_other_TM
Gnao1	1.45e-19	0.266787	0.108	0.036	2.85e-15	TM1_vs_all_other_TM
Anp32a	1.55e-19	-0.566078	0.285	0.395	3.05e-15	TM1_vs_all_other_TM
Syn3	1.61e-19	0.490271	0.321	0.199	3.17e-15	TM2_vs_other_TM
Col6a3	1.93e-19	-0.582551	0.148	0.272	3.79e-15	TM2_vs_other_TM
Sh3d19	1.93e-19	0.265836	0.176	0.079	3.79e-15	TM1_vs_all_other_TM
Ccl19	2e-19	0.347516	0.187	0.089	3.94e-15	TM2_vs_other_TM
Nampt	2.21e-19	0.44489	0.22	0.119	4.34e-15	TM3_vs_other_TM
Anxa1	2.25e-19	0.426689	0.473	0.327	4.42e-15	TM1_vs_all_other_TM
B3gnt9	2.26e-19	-0.32649	0.057	0.153	4.45e-15	TM3_vs_other_TM
Manf	2.29e-19	-0.479371	0.226	0.365	4.51e-15	TM3_vs_other_TM
Fst	2.3e-19	-0.452735	0.03	0.118	4.52e-15	TM2_vs_other_TM
Selenbp1	2.36e-19	-0.405735	0.029	0.112	4.63e-15	TM1_vs_all_other_TM
Rps9	2.53e-19	-0.291707	0.87	0.908	4.97e-15	TM3_vs_other_TM
Mt1	2.72e-19	-1.113	0.669	0.699	5.34e-15	TM1_vs_all_other_TM
Samd5	2.74e-19	0.259967	0.144	0.058	5.39e-15	TM1_vs_all_other_TM
Fam114a1	2.84e-19	0.288218	0.232	0.119	5.57e-15	TM1_vs_all_other_TM
Enah	3.02e-19	-0.337641	0.032	0.121	5.92e-15	TM2_vs_other_TM
Mustn1	3.04e-19	-0.507395	0.082	0.191	5.98e-15	TM2_vs_other_TM
Arrdc3	3.05e-19	-0.594312	0.052	0.144	5.99e-15	TM1_vs_all_other_TM
Cited2	3.12e-19	0.578957	0.424	0.314	6.13e-15	TM3_vs_other_TM
Cd200	3.28e-19	0.568477	0.347	0.223	6.43e-15	TM2_vs_other_TM
Shisa2	3.46e-19	-0.308044	0.036	0.119	6.79e-15	TM3_vs_other_TM
Kazald1	3.51e-19	0.448403	0.29	0.17	6.9e-15	TM2_vs_other_TM
Fat1	3.52e-19	-0.42402	0.078	0.187	6.92e-15	TM2_vs_other_TM
Anxa5	3.67e-19	0.323612	0.721	0.584	7.2e-15	TM1_vs_all_other_TM
Pdgfa	3.94e-19	-0.404067	0.078	0.187	7.74e-15	TM2_vs_other_TM
Srpr	4.07e-19	-0.386439	0.328	0.483	8e-15	TM3_vs_other_TM
Pld3	4.25e-19	0.275668	0.216	0.108	8.35e-15	TM1_vs_all_other_TM
Map4k3	4.3e-19	-0.49952	0.118	0.234	8.45e-15	TM2_vs_other_TM
Pmepa1	4.39e-19	-0.386	0.512	0.657	8.61e-15	TM3_vs_other_TM
Fgfrl1	4.38e-19	0.256947	0.102	0.033	8.61e-15	TM1_vs_all_other_TM
Scube1	4.43e-19	0.593143	0.392	0.273	8.7e-15	TM2_vs_other_TM
Ntrk3	4.53e-19	-0.38944	0.053	0.143	8.89e-15	TM3_vs_other_TM
Tppp3	4.68e-19	0.368525	0.132	0.054	9.19e-15	TM3_vs_other_TM
Prrx1	4.8e-19	-0.410659	0.303	0.45	9.43e-15	TM3_vs_other_TM
Adamts4	4.86e-19	-0.588864	0.055	0.148	9.54e-15	TM1_vs_all_other_TM
Cxcl1	5.2e-19	-0.92889	0.208	0.324	1.02e-14	TM1_vs_all_other_TM
Gm26532	5.22e-19	0.457225	0.763	0.634	1.02e-14	TM1_vs_all_other_TM
Ahnak	5.66e-19	-0.378371	0.59	0.707	1.11e-14	TM3_vs_other_TM
Rps21	5.97e-19	-0.336162	0.969	0.97	1.17e-14	TM3_vs_other_TM
Fhl2	6.58e-19	-0.366756	0.043	0.129	1.29e-14	TM3_vs_other_TM
Psmb8	6.94e-19	-0.434416	0.072	0.172	1.36e-14	TM1_vs_all_other_TM
Hmgn3	6.99e-19	-0.403844	0.293	0.437	1.37e-14	TM2_vs_other_TM
Rgs16	7.54e-18	0.276947	0.348	0.316	1.51e-14	All_TM_vs_all_other_cells
Mxra8	7.73e-19	0.430697	0.447	0.303	1.52e-14	TM1_vs_all_other_TM
Hspa5	8.78e-19	-0.429995	0.639	0.742	1.72e-14	TM3_vs_other_TM
Pcp4l1	8.82e-19	-0.443501	0.031	0.113	1.73e-14	TM1_vs_all_other_TM
Cdc42bpa	9.32e-19	0.290308	0.301	0.171	1.83e-14	TM1_vs_all_other_TM
Rbm39	1e-18	0.364074	0.751	0.692	1.97e-14	TM3_vs_other_TM
Axin2	1.01e-18	-0.364182	0.034	0.122	1.99e-14	TM2_vs_other_TM
Gnas	1.02e-18	0.374517	0.948	0.925	2.01e-14	TM1_vs_all_other_TM
Ahnak2	1.07e-18	-0.351149	0.06	0.154	2.1e-14	TM3_vs_other_TM
Dkk2	1.1e-18	0.416844	0.566	0.41	2.16e-14	TM1_vs_all_other_TM
Srpr	1.17e-18	0.342487	0.537	0.373	2.29e-14	TM1_vs_all_other_TM
B3gnt9	1.19e-18	0.265726	0.184	0.086	2.33e-14	TM1_vs_all_other_TM
Serf1	1.2e-18	-0.363655	0.198	0.335	2.35e-14	TM3_vs_other_TM
Hmgn1	1.36e-18	-0.412077	0.631	0.687	2.68e-14	TM1_vs_all_other_TM
Hs3st3b1	1.43e-18	0.483853	0.227	0.128	2.81e-14	TM3_vs_other_TM
Nkd2	1.54e-18	-0.410974	0.041	0.13	3.02e-14	TM2_vs_other_TM
Itgb1	1.58e-18	-0.425223	0.578	0.692	3.1e-14	TM2_vs_other_TM
Itgb5	1.65e-18	-0.404537	0.2	0.336	3.24e-14	TM3_vs_other_TM
Omd	1.66e-18	-0.598348	0.084	0.19	3.26e-14	TM2_vs_other_TM
Sumo2	1.68e-18	-0.326737	0.781	0.806	3.3e-14	TM1_vs_all_other_TM
Hexb	1.73e-18	-0.361756	0.113	0.227	3.39e-14	TM3_vs_other_TM
Basp1	1.86e-18	0.351242	0.118	0.044	3.65e-14	TM1_vs_all_other_TM
Celf2	1.89e-18	0.430302	0.172	0.084	3.72e-14	TM3_vs_other_TM
Tgfbr2	2.06e-18	0.3781	0.377	0.24	4.05e-14	TM1_vs_all_other_TM
Ptn	2.21e-18	0.902478	0.553	0.471	4.34e-14	TM2_vs_other_TM
Rgs5	2.37e-18	-0.943394	0.037	0.12	4.65e-14	TM1_vs_all_other_TM
Nenf	2.4e-18	0.359215	0.845	0.781	4.71e-14	TM1_vs_all_other_TM
Aldoa	2.43e-18	0.424751	0.611	0.543	4.77e-14	TM3_vs_other_TM
C1qtnf7	2.53e-18	-0.531418	0.143	0.253	4.96e-14	TM1_vs_all_other_TM
Add3	2.75e-18	-0.394893	0.106	0.215	5.4e-14	TM3_vs_other_TM
Nr4a1	2.78e-18	-0.494123	0.583	0.656	5.47e-14	TM1_vs_all_other_TM
Hdlbp	3.04e-18	-0.368667	0.306	0.454	5.98e-14	TM3_vs_other_TM
Gpc1	3.22e-18	-0.36893	0.025	0.106	6.32e-14	TM2_vs_other_TM
Srpx	3.31e-18	-0.328431	0.029	0.114	6.5e-14	TM2_vs_other_TM
Aopep	3.33e-18	0.333146	0.314	0.188	6.54e-14	TM1_vs_all_other_TM
Iigp1	3.36e-18	-0.78592	0.098	0.202	6.6e-14	TM1_vs_all_other_TM
Srp9	3.48e-18	0.285199	0.627	0.463	6.84e-14	TM1_vs_all_other_TM
Ndufb9	3.52e-18	0.331138	0.747	0.697	6.91e-14	TM3_vs_other_TM
Thbs1	3.57e-18	-0.957966	0.393	0.477	7e-14	TM2_vs_other_TM
Myd88	3.89e-18	0.541978	0.257	0.15	7.63e-14	TM2_vs_other_TM
Cacna1g	3.9e-18	-0.319684	0.092	0.198	7.67e-14	TM3_vs_other_TM
Il6st	3.94e-18	-0.413495	0.158	0.28	7.73e-14	TM3_vs_other_TM
Msx1	3.94e-18	-0.422343	0.069	0.171	7.74e-14	TM2_vs_other_TM
Siva1	4.2e-18	-0.392295	0.395	0.535	8.24e-14	TM2_vs_other_TM
Mprip	4.45e-18	0.467296	0.419	0.318	8.75e-14	TM3_vs_other_TM
Chst2	4.57e-17	0.383869	0.32	0.253	9.13e-14	All_TM_vs_all_other_cells
Pkd2	4.75e-18	-0.345177	0.196	0.331	9.33e-14	TM3_vs_other_TM
Cox5b	5.14e-18	-0.363953	0.732	0.765	1.01e-13	TM1_vs_all_other_TM
Yipf5	5.43e-18	0.28958	0.229	0.121	1.07e-13	TM1_vs_all_other_TM
Rorb	5.54e-18	-0.470005	0.034	0.116	1.09e-13	TM1_vs_all_other_TM
S100a1	5.69e-18	0.422486	0.45	0.34	1.12e-13	TM3_vs_other_TM
Tcea3	5.81e-18	-0.441419	0.167	0.291	1.14e-13	TM2_vs_other_TM
Txn1	6.43e-18	-0.413167	0.591	0.645	1.26e-13	TM1_vs_all_other_TM
Morf4l2	6.54e-18	0.294849	0.308	0.182	1.28e-13	TM1_vs_all_other_TM
Akap7	6.72e-18	-0.4799	0.081	0.178	1.32e-13	TM1_vs_all_other_TM
Sntb2	6.97e-18	-0.579545	0.285	0.384	1.37e-13	TM1_vs_all_other_TM
Pdlim4	7.14e-18	-0.402157	0.099	0.208	1.4e-13	TM2_vs_other_TM
Dkk2	7.63e-18	-0.436909	0.366	0.504	1.5e-13	TM2_vs_other_TM
Pcdh7	7.65e-18	-0.554708	0.147	0.258	1.5e-13	TM1_vs_all_other_TM
Atp5d	8.3e-18	0.389324	0.613	0.536	1.63e-13	TM3_vs_other_TM
Ddit4l	9.17e-18	0.373368	0.114	0.043	1.8e-13	TM1_vs_all_other_TM
Svil	9.49e-18	-0.377055	0.443	0.589	1.86e-13	TM3_vs_other_TM
Zfp36l2	9.67e-18	-0.492217	0.567	0.674	1.9e-13	TM2_vs_other_TM
Hlf	9.84e-18	-0.368497	0.032	0.107	1.93e-13	TM3_vs_other_TM
Mxra7	1.02e-17	-0.398091	0.428	0.561	1.99e-13	TM3_vs_other_TM
Ddost	1.03e-17	-0.391349	0.238	0.374	2.03e-13	TM3_vs_other_TM
BC028528	1.04e-17	0.297129	0.114	0.044	2.04e-13	TM3_vs_other_TM
Shisa2	1.14e-17	0.260289	0.144	0.062	2.24e-13	TM1_vs_all_other_TM
Maged1	1.22e-17	0.3693	0.524	0.376	2.39e-13	TM1_vs_all_other_TM
Tomm6	1.31e-17	0.359113	0.715	0.654	2.57e-13	TM3_vs_other_TM
Arhgdib	1.35e-17	-0.314943	0.07	0.167	2.65e-13	TM3_vs_other_TM
Aopep	1.37e-17	-0.389807	0.155	0.273	2.69e-13	TM3_vs_other_TM
Crip1	1.47e-17	0.419316	0.533	0.383	2.88e-13	TM1_vs_all_other_TM
Bok	1.48e-17	0.323293	0.111	0.042	2.91e-13	TM3_vs_other_TM
Thra	1.56e-17	0.401369	0.587	0.494	3.07e-13	TM3_vs_other_TM
Ltbp2	1.64e-17	-0.645343	0.094	0.2	3.23e-13	TM2_vs_other_TM
Prdx5	1.8e-17	0.385008	0.554	0.471	3.54e-13	TM3_vs_other_TM
Gpc4	1.86e-17	-0.345917	0.036	0.12	3.65e-13	TM2_vs_other_TM
Ost4	2.04e-17	-0.284299	0.75	0.825	4.01e-13	TM2_vs_other_TM
Ppfibp1	2.22e-17	0.287495	0.169	0.079	4.35e-13	TM1_vs_all_other_TM
Ccl2	2.24e-17	1.10283	0.207	0.112	4.39e-13	TM2_vs_other_TM
Nudt4	2.25e-17	-0.440757	0.189	0.31	4.42e-13	TM2_vs_other_TM
Lysmd2	2.38e-17	0.450286	0.374	0.266	4.67e-13	TM3_vs_other_TM
Foxd2os	2.47e-17	-0.358697	0.112	0.219	4.85e-13	TM3_vs_other_TM
Crim1	2.48e-17	0.32366	0.201	0.102	4.88e-13	TM1_vs_all_other_TM
Ndufb2	2.49e-17	0.363436	0.593	0.514	4.89e-13	TM3_vs_other_TM
Ndufa1	2.52e-17	-0.294113	0.688	0.785	4.95e-13	TM2_vs_other_TM
Tmem176b	3.02e-17	-0.398837	0.611	0.668	5.93e-13	TM1_vs_all_other_TM
Medag	3.2e-17	0.342931	0.131	0.055	6.28e-13	TM2_vs_other_TM
Rgs7bp	3.23e-17	0.392279	0.242	0.136	6.34e-13	TM2_vs_other_TM
Dync2h1	3.24e-17	0.269492	0.178	0.087	6.37e-13	TM1_vs_all_other_TM
Tent5a	3.48e-17	-0.377057	0.153	0.271	6.84e-13	TM3_vs_other_TM
Dpysl3	3.79e-17	-0.370117	0.486	0.603	7.44e-13	TM2_vs_other_TM
Adamts10	4.42e-17	-0.308284	0.124	0.237	8.68e-13	TM3_vs_other_TM
Ptgfrn	4.54e-17	0.252761	0.196	0.097	8.92e-13	TM1_vs_all_other_TM
Lamb2	4.77e-17	-0.405557	0.251	0.388	9.37e-13	TM3_vs_other_TM
Bsg	4.86e-17	-0.407889	0.675	0.758	9.54e-13	TM2_vs_other_TM
Ccl7	5e-17	-0.762427	0.03	0.102	9.82e-13	TM3_vs_other_TM
Tent5a	5.01e-17	-0.48324	0.147	0.263	9.85e-13	TM2_vs_other_TM
Atp5j2	5.44e-17	-0.328846	0.759	0.782	1.07e-12	TM1_vs_all_other_TM
Gfpt2	5.55e-17	0.332007	0.144	0.063	1.09e-12	TM2_vs_other_TM
Rasl11a	5.75e-17	0.609837	0.436	0.323	1.13e-12	TM3_vs_other_TM
Ndufa4l2	5.87e-17	-0.392149	0.069	0.161	1.15e-12	TM3_vs_other_TM
H2afz	5.98e-17	-0.36094	0.712	0.761	1.17e-12	TM1_vs_all_other_TM
Smap1	6.01e-17	-0.483833	0.471	0.55	1.18e-12	TM1_vs_all_other_TM
Sema3d	6.38e-17	0.357282	0.117	0.046	1.25e-12	TM2_vs_other_TM
Lamp2	6.53e-17	-0.394427	0.346	0.488	1.28e-12	TM3_vs_other_TM
Itgb5	7.53e-17	0.348986	0.373	0.244	1.48e-12	TM1_vs_all_other_TM
Daam2	7.86e-17	-0.354757	0.057	0.148	1.54e-12	TM2_vs_other_TM
H3f3a	8.24e-17	-0.291422	0.831	0.884	1.62e-12	TM2_vs_other_TM
Morf4l2	8.35e-17	-0.334508	0.148	0.266	1.64e-12	TM3_vs_other_TM
Psma2	8.46e-17	0.355908	0.558	0.472	1.66e-12	TM3_vs_other_TM
Ppt1	8.51e-17	0.314823	0.327	0.2	1.67e-12	TM1_vs_all_other_TM
Jag1	8.7e-17	-0.335225	0.049	0.131	1.71e-12	TM3_vs_other_TM
Ifit3	9e-17	-0.680803	0.036	0.114	1.77e-12	TM1_vs_all_other_TM
Myo1d	9.41e-17	-0.260121	0.052	0.137	1.85e-12	TM3_vs_other_TM
Fibp	9.92e-17	-0.539035	0.152	0.255	1.95e-12	TM1_vs_all_other_TM
Kdelr2	9.97e-17	0.354	0.322	0.2	1.96e-12	TM1_vs_all_other_TM
Sub1	1.01e-16	0.438514	0.501	0.409	1.98e-12	TM3_vs_other_TM
Vamp5	1.01e-16	0.285517	0.303	0.182	1.98e-12	TM1_vs_all_other_TM
Tuba1a	1.05e-16	0.412647	0.608	0.504	2.05e-12	TM2_vs_other_TM
Bex3	1.17e-16	0.40953	0.547	0.457	2.31e-12	TM3_vs_other_TM
Ndufb9	1.21e-16	-0.358919	0.702	0.722	2.37e-12	TM1_vs_all_other_TM
Hacd2	1.24e-16	0.427607	0.181	0.097	2.44e-12	TM3_vs_other_TM
Kctd12	1.26e-16	0.425077	0.164	0.079	2.48e-12	TM2_vs_other_TM
Ndufa5	1.27e-16	-0.354647	0.715	0.762	2.5e-12	TM1_vs_all_other_TM
Plagl1	1.28e-16	-0.257568	0.05	0.133	2.52e-12	TM3_vs_other_TM
Eva1b	1.29e-16	0.323893	0.43	0.291	2.53e-12	TM1_vs_all_other_TM
Prelp	1.33e-16	-0.805472	0.281	0.384	2.61e-12	TM2_vs_other_TM
Mmp23	1.34e-16	-0.307162	0.033	0.106	2.63e-12	TM3_vs_other_TM
Col6a2	1.34e-15	0.292361	0.347	0.27	2.67e-12	All_TM_vs_all_other_cells
Syne1	1.37e-16	-0.399714	0.066	0.16	2.69e-12	TM2_vs_other_TM
Cox6b1	1.38e-16	-0.340948	0.736	0.769	2.71e-12	TM1_vs_all_other_TM
Snhg8	1.38e-16	-0.382033	0.288	0.428	2.72e-12	TM3_vs_other_TM
Klf4	1.43e-16	-0.360747	0.507	0.63	2.82e-12	TM3_vs_other_TM
Tnxb	1.47e-16	-0.331381	0.033	0.109	2.88e-12	TM1_vs_all_other_TM
Gbp2	1.48e-16	0.397926	0.117	0.047	2.9e-12	TM2_vs_other_TM
Tmem45a	1.48e-16	-0.354435	0.065	0.153	2.9e-12	TM3_vs_other_TM
Rhoa	1.49e-16	-0.462178	0.515	0.582	2.93e-12	TM1_vs_all_other_TM
Macf1	1.55e-16	0.466275	0.439	0.348	3.05e-12	TM3_vs_other_TM
Fam114a1	1.63e-16	-0.310798	0.092	0.192	3.2e-12	TM3_vs_other_TM
Rps17	1.68e-16	0.295991	0.783	0.72	3.3e-12	TM3_vs_other_TM
Prnp	1.69e-16	-0.402003	0.14	0.252	3.31e-12	TM2_vs_other_TM
Hmox1	1.7e-16	0.395091	0.159	0.076	3.33e-12	TM2_vs_other_TM
Cdh2	1.7e-16	-0.369664	0.033	0.104	3.34e-12	TM3_vs_other_TM
Arl5a	1.72e-16	-0.276114	0.066	0.157	3.38e-12	TM3_vs_other_TM
Rps26	1.86e-16	-0.278631	0.839	0.884	3.66e-12	TM3_vs_other_TM
Gm15867	1.91e-16	-0.321338	0.049	0.136	3.74e-12	TM2_vs_other_TM
Ntn1	1.92e-16	-0.451028	0.057	0.142	3.76e-12	TM1_vs_all_other_TM
Slc30a5	2.03e-16	0.260864	0.134	0.057	3.99e-12	TM1_vs_all_other_TM
Psme1	2.06e-16	-0.463767	0.338	0.443	4.05e-12	TM1_vs_all_other_TM
H2-T23	2.42e-16	-0.337417	0.068	0.158	4.75e-12	TM3_vs_other_TM
Surf4	2.43e-16	0.314033	0.239	0.134	4.78e-12	TM1_vs_all_other_TM
Hbegf	2.46e-16	-0.475716	0.109	0.208	4.84e-12	TM3_vs_other_TM
Myo6	2.56e-16	-0.295652	0.116	0.225	5.03e-12	TM3_vs_other_TM
Hist1h2bc	2.65e-16	0.585912	0.348	0.249	5.2e-12	TM3_vs_other_TM
Vkorc1	2.87e-16	-0.403708	0.401	0.524	5.64e-12	TM3_vs_other_TM
Cd109	2.95e-16	-0.322196	0.041	0.123	5.8e-12	TM2_vs_other_TM
Atp1b3	3.19e-16	0.482685	0.292	0.185	6.26e-12	TM2_vs_other_TM
Heg1	3.24e-16	0.299995	0.116	0.047	6.36e-12	TM2_vs_other_TM
Dbp	3.33e-16	0.441796	0.13	0.057	6.53e-12	TM2_vs_other_TM
Pla2g4a	3.37e-16	0.410076	0.231	0.131	6.62e-12	TM1_vs_all_other_TM
Gm1673	3.41e-16	-0.399963	0.173	0.29	6.69e-12	TM2_vs_other_TM
Etfb	3.43e-16	-0.469646	0.339	0.436	6.74e-12	TM1_vs_all_other_TM
Rtn1	3.45e-16	-0.492746	0.149	0.254	6.77e-12	TM1_vs_all_other_TM
1700025G04Rik	3.54e-16	-0.250879	0.079	0.174	6.95e-12	TM3_vs_other_TM
Cox7b	3.86e-16	0.400284	0.59	0.517	7.58e-12	TM3_vs_other_TM
Dut	4.12e-16	-0.449504	0.177	0.293	8.1e-12	TM3_vs_other_TM
Nbl1	4.29e-15	0.320948	0.442	0.464	8.58e-12	All_TM_vs_all_other_cells
Ivns1abp	4.43e-16	-0.315474	0.053	0.134	8.7e-12	TM3_vs_other_TM
Ifi27l2a	4.88e-16	-0.791646	0.191	0.298	9.59e-12	TM1_vs_all_other_TM
Cox20	5e-16	0.45687	0.483	0.407	9.82e-12	TM3_vs_other_TM
Scarf2	5.09e-16	-0.41198	0.28	0.404	1e-11	TM2_vs_other_TM
Sdf4	5.11e-16	-0.381351	0.303	0.436	1e-11	TM3_vs_other_TM
P4hb	5.12e-16	-0.358021	0.221	0.349	1.01e-11	TM3_vs_other_TM
Fxyd6	5.35e-16	-0.367529	0.16	0.273	1.05e-11	TM3_vs_other_TM
Gamt	5.67e-16	0.396158	0.216	0.128	1.11e-11	TM3_vs_other_TM
Glg1	5.71e-16	0.335082	0.482	0.336	1.12e-11	TM1_vs_all_other_TM
Ndufa7	6.08e-16	-0.347675	0.735	0.76	1.19e-11	TM1_vs_all_other_TM
H2-T23	6.14e-16	0.40858	0.186	0.098	1.21e-11	TM2_vs_other_TM
Col15a1	6.2e-16	0.38067	0.116	0.047	1.22e-11	TM2_vs_other_TM
Insig1	6.7e-16	-0.379408	0.057	0.145	1.32e-11	TM2_vs_other_TM
Milr1	6.89e-16	-0.402096	0.074	0.163	1.35e-11	TM1_vs_all_other_TM
Sash1	7.08e-16	-0.275535	0.074	0.166	1.39e-11	TM3_vs_other_TM
Ephb6	7.36e-16	-0.35682	0.041	0.122	1.45e-11	TM2_vs_other_TM
Ebf1	7.44e-16	-0.399391	0.054	0.136	1.46e-11	TM3_vs_other_TM
Nr1d1	7.44e-16	0.314535	0.164	0.08	1.46e-11	TM1_vs_all_other_TM
H2afv	7.54e-16	0.303067	0.751	0.705	1.48e-11	TM3_vs_other_TM
B2m	7.88e-16	0.37498	0.602	0.479	1.55e-11	TM2_vs_other_TM
Ifit1	7.98e-16	-0.742763	0.051	0.132	1.57e-11	TM1_vs_all_other_TM
Hmgcs1	8.14e-16	-0.418827	0.084	0.181	1.6e-11	TM2_vs_other_TM
Atp5e	8.23e-16	0.251848	0.925	0.911	1.62e-11	TM3_vs_other_TM
Krtcap2	8.42e-16	0.277432	0.73	0.609	1.65e-11	TM1_vs_all_other_TM
Rian	8.47e-16	0.336379	0.143	0.065	1.66e-11	TM1_vs_all_other_TM
Ndufs5	8.67e-16	0.31734	0.688	0.631	1.7e-11	TM3_vs_other_TM
Mtr	9.39e-16	0.339947	0.12	0.052	1.84e-11	TM3_vs_other_TM
Gnptg	9.51e-16	-0.314287	0.09	0.185	1.87e-11	TM3_vs_other_TM
Tomm6	9.94e-16	-0.376781	0.648	0.69	1.95e-11	TM1_vs_all_other_TM
Hes1	1.03e-15	0.306442	0.781	0.673	2.01e-11	TM1_vs_all_other_TM
Htra1	1.07e-15	-0.564336	0.237	0.346	2.1e-11	TM3_vs_other_TM
Lifr	1.07e-15	0.258688	0.113	0.045	2.11e-11	TM2_vs_other_TM
Rtn4	1.08e-15	-0.427498	0.416	0.525	2.12e-11	TM2_vs_other_TM
Ctsk	1.17e-15	-0.462731	0.339	0.457	2.29e-11	TM2_vs_other_TM
Smad3	1.23e-15	-0.294207	0.042	0.116	2.41e-11	TM3_vs_other_TM
Ugp2	1.26e-15	0.422894	0.247	0.157	2.47e-11	TM3_vs_other_TM
Cxcl1	1.28e-15	-0.597386	0.213	0.329	2.51e-11	TM3_vs_other_TM
Atf3	1.35e-15	0.380664	0.743	0.694	2.64e-11	TM2_vs_other_TM
F2r	1.38e-15	-0.468177	0.141	0.249	2.71e-11	TM2_vs_other_TM
P3h4	1.42e-15	-0.294671	0.104	0.204	2.78e-11	TM3_vs_other_TM
Cyba	1.58e-15	-0.403191	0.532	0.596	3.11e-11	TM1_vs_all_other_TM
Mrc2	1.59e-15	-0.329908	0.177	0.298	3.13e-11	TM3_vs_other_TM
Tnfrsf12a	1.6e-15	0.254918	0.119	0.05	3.14e-11	TM1_vs_all_other_TM
Rhoc	1.7e-15	-0.454296	0.424	0.506	3.35e-11	TM1_vs_all_other_TM
Emilin1	1.71e-15	-0.411958	0.174	0.285	3.37e-11	TM2_vs_other_TM
Dbi	1.85e-15	-0.358391	0.707	0.782	3.64e-11	TM2_vs_other_TM
Edf1	1.91e-15	-0.328891	0.719	0.742	3.76e-11	TM1_vs_all_other_TM
Rnase4	1.98e-15	0.270278	0.288	0.173	3.9e-11	TM1_vs_all_other_TM
Prrc1	2.07e-15	-0.282074	0.115	0.221	4.07e-11	TM3_vs_other_TM
Mmp14	2.13e-15	0.397453	0.39	0.279	4.18e-11	TM2_vs_other_TM
Marcksl1	2.28e-15	0.43628	0.218	0.124	4.48e-11	TM2_vs_other_TM
Atp5d	2.29e-15	-0.410716	0.52	0.585	4.5e-11	TM1_vs_all_other_TM
Ier3ip1	2.4e-15	-0.336421	0.42	0.559	4.71e-11	TM3_vs_other_TM
Dnajc3	2.41e-15	0.329627	0.564	0.418	4.74e-11	TM1_vs_all_other_TM
Olfml2a	2.55e-15	0.378534	0.195	0.107	5e-11	TM2_vs_other_TM
Ahnak	2.59e-15	0.285688	0.742	0.626	5.09e-11	TM1_vs_all_other_TM
Crtap	2.64e-15	-0.329731	0.136	0.244	5.19e-11	TM3_vs_other_TM
Nfkbiz	2.72e-15	0.481031	0.402	0.296	5.35e-11	TM2_vs_other_TM
Smco4	2.8e-15	-0.39973	0.115	0.218	5.51e-11	TM2_vs_other_TM
Sox4	2.99e-15	-0.547526	0.176	0.278	5.87e-11	TM1_vs_all_other_TM
Eif1a	3.06e-15	-0.331486	0.267	0.401	6.01e-11	TM3_vs_other_TM
Pdlim2	3.11e-15	0.385415	0.415	0.311	6.1e-11	TM3_vs_other_TM
Mrc2	3.4e-15	0.310748	0.335	0.214	6.68e-11	TM1_vs_all_other_TM
Glis2	4.04e-15	-0.265027	0.045	0.12	7.93e-11	TM3_vs_other_TM
Suclg2	4.07e-15	-0.353738	0.08	0.173	7.99e-11	TM2_vs_other_TM
Bag3	4.26e-15	0.273253	0.213	0.116	8.37e-11	TM1_vs_all_other_TM
Msi2	4.43e-15	0.290998	0.338	0.217	8.7e-11	TM1_vs_all_other_TM
Cdkn1c	4.46e-15	-0.485585	0.468	0.578	8.76e-11	TM3_vs_other_TM
Hacd4	4.52e-15	-0.494037	0.137	0.233	8.87e-11	TM1_vs_all_other_TM
Chd3	4.61e-15	-0.477094	0.308	0.405	9.05e-11	TM1_vs_all_other_TM
Rpn2	4.94e-15	-0.340966	0.185	0.3	9.7e-11	TM3_vs_other_TM
Wfdc1	5.06e-15	-0.445705	0.128	0.224	9.95e-11	TM1_vs_all_other_TM
Cdkn1c	5.21e-15	0.527569	0.609	0.503	1.02e-10	TM1_vs_all_other_TM
Tnfsf12	5.24e-15	-0.472883	0.228	0.326	1.03e-10	TM1_vs_all_other_TM
Ifitm1	5.41e-15	0.377942	0.543	0.41	1.06e-10	TM2_vs_other_TM
Hsph1	5.4e-15	0.453312	0.246	0.148	1.06e-10	TM1_vs_all_other_TM
Calr	5.6e-15	-0.389033	0.265	0.392	1.1e-10	TM3_vs_other_TM
Aox3	5.63e-15	-0.353196	0.174	0.288	1.11e-10	TM3_vs_other_TM
Psme1	5.85e-15	0.382012	0.468	0.374	1.15e-10	TM3_vs_other_TM
Irf1	5.92e-15	0.427058	0.687	0.609	1.16e-10	TM2_vs_other_TM
Stmn1	5.91e-15	0.34772	0.135	0.064	1.16e-10	TM3_vs_other_TM
Hspa1a	6.09e-15	0.465607	0.407	0.291	1.2e-10	TM2_vs_other_TM
Ntn4	6.13e-15	-0.331623	0.106	0.202	1.2e-10	TM3_vs_other_TM
2024-09-11	6.22e-15	-0.268233	0.104	0.203	1.22e-10	TM3_vs_other_TM
Rarb	6.27e-15	0.285982	0.198	0.106	1.23e-10	TM2_vs_other_TM
Gnb4	6.54e-15	0.417102	0.276	0.176	1.28e-10	TM2_vs_other_TM
Junb	6.58e-15	0.26615	0.948	0.966	1.29e-10	TM2_vs_other_TM
Rtn4	6.72e-15	-0.508688	0.448	0.513	1.32e-10	TM1_vs_all_other_TM
Atp6v1f	6.75e-15	0.353031	0.601	0.536	1.33e-10	TM3_vs_other_TM
Etfb	6.78e-15	0.399716	0.46	0.372	1.33e-10	TM3_vs_other_TM
Spry2	6.81e-15	0.27784	0.146	0.068	1.34e-10	TM2_vs_other_TM
Igsf3	6.81e-15	-0.379508	0.04	0.112	1.34e-10	TM1_vs_all_other_TM
Gsn	6.85e-15	0.352904	0.749	0.692	1.35e-10	TM2_vs_other_TM
Fermt2	7e-15	-0.433359	0.414	0.498	1.37e-10	TM1_vs_all_other_TM
Gadd45g	7.51e-15	-0.462681	0.365	0.486	1.48e-10	TM3_vs_other_TM
Hlf	7.62e-15	-0.343451	0.033	0.102	1.5e-10	TM1_vs_all_other_TM
Il11ra1	7.99e-15	-0.356928	0.556	0.639	1.57e-10	TM2_vs_other_TM
Sdc3	8.08e-15	-0.340249	0.101	0.195	1.59e-10	TM3_vs_other_TM
Milr1	8.29e-15	0.370397	0.186	0.103	1.63e-10	TM3_vs_other_TM
Spock2	9.45e-15	-0.318892	0.05	0.131	1.86e-10	TM2_vs_other_TM
Plk2	9.5e-15	-0.360159	0.122	0.223	1.87e-10	TM3_vs_other_TM
Zfp618	9.55e-15	-0.419841	0.061	0.145	1.88e-10	TM2_vs_other_TM
Slc39a7	9.76e-15	-0.315091	0.122	0.225	1.92e-10	TM3_vs_other_TM
Prss23	9.81e-15	-0.270625	0.114	0.222	1.93e-10	TM2_vs_other_TM
Myh10	9.83e-15	-0.452651	0.158	0.26	1.93e-10	TM1_vs_all_other_TM
Ybx3	1.02e-14	-0.290563	0.175	0.29	2e-10	TM3_vs_other_TM
Emp2	1.03e-14	0.312447	0.34	0.22	2.02e-10	TM1_vs_all_other_TM
Idh2	1.06e-14	0.41006	0.261	0.17	2.09e-10	TM3_vs_other_TM
Csrp1	1.06e-14	-0.493449	0.249	0.348	2.09e-10	TM1_vs_all_other_TM
Ech1	1.07e-14	0.466208	0.327	0.238	2.1e-10	TM3_vs_other_TM
Ldhb	1.12e-14	0.398526	0.439	0.35	2.2e-10	TM3_vs_other_TM
Nfib	1.12e-14	0.276584	0.501	0.359	2.2e-10	TM1_vs_all_other_TM
Mrps6	1.14e-14	-0.355596	0.495	0.612	2.25e-10	TM2_vs_other_TM
Uqcr10	1.3e-14	-0.295403	0.706	0.793	2.56e-10	TM2_vs_other_TM
Ptgs2	1.32e-14	0.639972	0.283	0.183	2.59e-10	TM2_vs_other_TM
Sntb2	1.37e-14	0.473334	0.424	0.319	2.68e-10	TM2_vs_other_TM
Dnajc25	1.41e-14	-0.259896	0.082	0.172	2.77e-10	TM3_vs_other_TM
Tgfb2	1.45e-14	-0.369745	0.076	0.161	2.85e-10	TM3_vs_other_TM
Atp1b2	1.58e-14	-0.364749	0.088	0.182	3.09e-10	TM2_vs_other_TM
Zbtb20	1.58e-14	-0.348929	0.568	0.678	3.1e-10	TM3_vs_other_TM
Kank1	1.6e-14	-0.377283	0.067	0.152	3.14e-10	TM2_vs_other_TM
Tmem45a	1.64e-14	0.406538	0.178	0.096	3.22e-10	TM2_vs_other_TM
Cpne2	1.64e-14	-0.326803	0.039	0.114	3.22e-10	TM2_vs_other_TM
Tnnt1	1.77e-14	0.363829	0.112	0.049	3.47e-10	TM3_vs_other_TM
Chad	1.82e-13	0.384067	0.26	0.213	3.64e-10	All_TM_vs_all_other_cells
Ikbip	1.86e-14	-0.270374	0.166	0.279	3.65e-10	TM3_vs_other_TM
Churc1	1.93e-14	-0.426992	0.358	0.455	3.79e-10	TM1_vs_all_other_TM
Tagln2	1.96e-14	0.417504	0.356	0.26	3.85e-10	TM3_vs_other_TM
Ndufa13	1.98e-14	0.260926	0.816	0.766	3.88e-10	TM3_vs_other_TM
Dmpk	1.98e-14	-0.403011	0.088	0.179	3.89e-10	TM2_vs_other_TM
Ldlr	2.07e-14	-0.338969	0.036	0.108	4.06e-10	TM2_vs_other_TM
Ccpg1	2.1e-14	0.261392	0.19	0.101	4.13e-10	TM1_vs_all_other_TM
Ninj1	2.34e-14	-0.295572	0.063	0.147	4.59e-10	TM2_vs_other_TM
Atp5f1	2.48e-14	-0.38536	0.542	0.593	4.87e-10	TM1_vs_all_other_TM
Epb41l2	2.51e-14	0.474306	0.327	0.223	4.93e-10	TM2_vs_other_TM
Uvrag	2.6e-14	0.296714	0.202	0.112	5.11e-10	TM1_vs_all_other_TM
C1qtnf12	2.61e-14	0.255094	0.199	0.108	5.13e-10	TM1_vs_all_other_TM
Atf5	2.64e-14	0.490987	0.22	0.129	5.18e-10	TM2_vs_other_TM
Nucb2	2.83e-14	-0.410257	0.197	0.308	5.56e-10	TM2_vs_other_TM
Lpp	2.91e-14	0.402799	0.262	0.173	5.71e-10	TM3_vs_other_TM
Calml4	3.06e-14	0.400971	0.305	0.209	6.02e-10	TM3_vs_other_TM
Srebf2	3.08e-14	-0.337469	0.054	0.135	6.06e-10	TM2_vs_other_TM
Ptgs2	3.08e-14	-0.473833	0.148	0.251	6.06e-10	TM3_vs_other_TM
Sfrp1	3.11e-14	-0.5008	0.084	0.172	6.12e-10	TM2_vs_other_TM
Ckap4	3.21e-14	0.324215	0.312	0.202	6.3e-10	TM1_vs_all_other_TM
Ctnna1	3.29e-14	-0.42275	0.351	0.455	6.46e-10	TM2_vs_other_TM
Cd34	3.44e-14	0.260495	0.109	0.046	6.75e-10	TM2_vs_other_TM
Ugcg	3.47e-14	0.297566	0.179	0.094	6.82e-10	TM1_vs_all_other_TM
Myof	3.8e-14	-0.314948	0.079	0.169	7.47e-10	TM2_vs_other_TM
Kctd1	3.97e-14	0.398853	0.225	0.14	7.79e-10	TM3_vs_other_TM
Tle4	4.06e-14	-0.414448	0.266	0.373	7.97e-10	TM1_vs_all_other_TM
Dtd1	4.11e-14	-0.414123	0.151	0.251	8.08e-10	TM2_vs_other_TM
Maged2	4.16e-14	0.424385	0.353	0.259	8.17e-10	TM3_vs_other_TM
Rora	4.21e-14	-0.306171	0.118	0.217	8.27e-10	TM3_vs_other_TM
Samhd1	4.21e-14	-0.33775	0.16	0.265	8.27e-10	TM3_vs_other_TM
Gpc3	4.24e-14	-0.772693	0.332	0.42	8.32e-10	TM1_vs_all_other_TM
6330403K07Rik	4.29e-14	0.372114	0.223	0.138	8.42e-10	TM3_vs_other_TM
Atp5g2	4.32e-14	-0.253731	0.763	0.836	8.48e-10	TM2_vs_other_TM
Gpx4	4.45e-14	0.289202	0.754	0.708	8.75e-10	TM3_vs_other_TM
Cd200	4.7e-14	0.275838	0.341	0.222	9.24e-10	TM1_vs_all_other_TM
Gnb2	5.18e-14	0.329968	0.546	0.467	1.02e-09	TM3_vs_other_TM
Rtp4	5.61e-14	0.285977	0.102	0.042	1.1e-09	TM2_vs_other_TM
Mpc2	5.68e-14	0.30813	0.653	0.608	1.12e-09	TM3_vs_other_TM
Ran	5.79e-14	0.337933	0.603	0.534	1.14e-09	TM3_vs_other_TM
Olfml1	5.88e-14	-0.312741	0.05	0.128	1.15e-09	TM2_vs_other_TM
Por	6.3e-14	0.379247	0.19	0.106	1.24e-09	TM2_vs_other_TM
Park7	6.39e-14	0.325748	0.682	0.638	1.25e-09	TM3_vs_other_TM
Pdia3	6.4e-14	-0.351181	0.544	0.648	1.26e-09	TM3_vs_other_TM
Cnn2	6.84e-14	-0.362203	0.198	0.31	1.34e-09	TM2_vs_other_TM
Tmem160	7.18e-14	0.259181	0.366	0.244	1.41e-09	TM1_vs_all_other_TM
Mn1	7.23e-14	0.252939	0.135	0.064	1.42e-09	TM1_vs_all_other_TM
Ncald	7.16e-13	0.301821	0.346	0.279	1.43e-09	All_TM_vs_all_other_cells
Frmd6	7.37e-14	-0.29008	0.063	0.141	1.45e-09	TM3_vs_other_TM
Tmod3	7.78e-14	0.348534	0.202	0.115	1.53e-09	TM2_vs_other_TM
Nsg1	8e-14	0.318893	0.177	0.094	1.57e-09	TM2_vs_other_TM
Pla2g4a	8.34e-14	-0.34626	0.106	0.197	1.64e-09	TM3_vs_other_TM
Helz2	8.79e-14	0.259386	0.104	0.043	1.73e-09	TM2_vs_other_TM
Hip1	9.31e-14	-0.302364	0.05	0.127	1.83e-09	TM2_vs_other_TM
Grcc10	9.51e-14	0.334548	0.671	0.621	1.87e-09	TM3_vs_other_TM
Selenbp1	9.66e-14	0.298424	0.133	0.063	1.9e-09	TM2_vs_other_TM
Ebf1	9.81e-14	0.364233	0.158	0.081	1.93e-09	TM1_vs_all_other_TM
Hmg20b	1.01e-13	-0.380404	0.208	0.314	1.99e-09	TM2_vs_other_TM
Ndufs2	1.02e-13	-0.519593	0.274	0.367	1.99e-09	TM1_vs_all_other_TM
Ltbp1	1.01e-12	0.270468	0.353	0.346	2.02e-09	All_TM_vs_all_other_cells
Creg1	1.09e-13	0.265831	0.378	0.254	2.15e-09	TM1_vs_all_other_TM
Pkp4	1.18e-13	0.349326	0.126	0.06	2.31e-09	TM3_vs_other_TM
Fibp	1.2e-13	0.390713	0.277	0.19	2.35e-09	TM3_vs_other_TM
N4bp2	1.32e-13	0.353456	0.128	0.062	2.6e-09	TM3_vs_other_TM
Plscr4	1.36e-13	0.310138	0.214	0.123	2.67e-09	TM2_vs_other_TM
Arhgap42	1.42e-13	0.343772	0.168	0.093	2.78e-09	TM3_vs_other_TM
Spcs3	1.45e-13	-0.280204	0.065	0.143	2.84e-09	TM3_vs_other_TM
Mtss1	1.45e-13	-0.292131	0.034	0.102	2.85e-09	TM2_vs_other_TM
S100a6	1.47e-13	-0.387521	0.987	0.985	2.88e-09	TM3_vs_other_TM
Lmo7	1.5e-13	0.378643	0.136	0.07	2.95e-09	TM3_vs_other_TM
Adra1b	1.6e-13	0.331933	0.106	0.047	3.14e-09	TM3_vs_other_TM
Rpn1	1.6e-13	0.28494	0.356	0.238	3.14e-09	TM1_vs_all_other_TM
Hspb2	1.81e-13	0.415047	0.201	0.123	3.56e-09	TM3_vs_other_TM
Ier2	1.9e-13	-0.258736	0.814	0.868	3.72e-09	TM3_vs_other_TM
Actn4	1.96e-13	-0.416835	0.3	0.402	3.84e-09	TM2_vs_other_TM
Rspo3	2.04e-13	0.406437	0.193	0.112	4.01e-09	TM3_vs_other_TM
Dipk2a	2.1e-13	0.334206	0.123	0.059	4.12e-09	TM3_vs_other_TM
Clint1	2.13e-13	-0.269596	0.113	0.207	4.19e-09	TM3_vs_other_TM
Efemp1	2.23e-13	-0.503482	0.146	0.238	4.37e-09	TM3_vs_other_TM
Ctla2a	2.34e-12	-0.325746	0.204	0.326	4.68e-09	All_TM_vs_all_other_cells
Zfp36l1	2.38e-13	-0.454446	0.482	0.55	4.68e-09	TM1_vs_all_other_TM
Serpinh1	2.47e-13	-0.428887	0.478	0.577	4.85e-09	TM3_vs_other_TM
Uqcr10	2.48e-13	-0.324311	0.759	0.77	4.88e-09	TM1_vs_all_other_TM
Gsdme	2.56e-13	-0.253815	0.05	0.121	5.03e-09	TM3_vs_other_TM
Ass1	2.56e-13	-0.329618	0.04	0.108	5.03e-09	TM1_vs_all_other_TM
Surf4	2.71e-13	-0.28497	0.111	0.202	5.32e-09	TM3_vs_other_TM
Col4a1	2.68e-12	0.254664	0.425	0.411	5.36e-09	All_TM_vs_all_other_cells
Cald1	2.93e-13	-0.285836	0.616	0.714	5.76e-09	TM2_vs_other_TM
4930523C07Rik	2.95e-13	-0.444182	0.085	0.165	5.79e-09	TM1_vs_all_other_TM
Maf	2.97e-13	-0.371841	0.063	0.141	5.83e-09	TM2_vs_other_TM
Ghr	2.97e-13	-0.268713	0.041	0.106	5.84e-09	TM3_vs_other_TM
Slc39a7	3.18e-13	0.254281	0.255	0.154	6.25e-09	TM1_vs_all_other_TM
Cfh	3.44e-12	0.272213	0.385	0.346	6.87e-09	All_TM_vs_all_other_cells
Tmem167	3.53e-13	0.262823	0.448	0.319	6.93e-09	TM1_vs_all_other_TM
Ndufc1	3.57e-13	-0.285606	0.693	0.76	7e-09	TM2_vs_other_TM
Gaa	3.6e-13	-0.309179	0.175	0.284	7.07e-09	TM3_vs_other_TM
Col4a1	3.78e-13	-0.357738	0.261	0.378	7.42e-09	TM3_vs_other_TM
[truncated: 564 more rows]
