# Supplementary material for: Single-cell profiling of trabecular meshwork identifies mitochondrial dysfunction in a glaucoma model that is protected by vitamin B3 treatment
Source: eLife. 2026 Jan 20;14:RP107161. doi: 10.7554/eLife.107161 (PMC12818872; doi:10.7554/eLife.107161)
Supplement: Supplementary file 3. [file elife-107161-supp3.xlsx]

## Sheet: File 3
Group	TM_subtype	Category	ID	Description	GeneRatio_go	BgRatio_go	pvalue_go	p.adjust_go	qvalue_go	geneID_go	Count_go	setSize_gsea	Activity	enrichmentScore_gsea	NES_gsea	pvalue_gsea	p.adjust_gsea	qvalues_gsea	rank_gsea	leading_edge_gsea	core_enrichment_gsea
TM_all_BP_GO:0009888	TM_all	BP	GO:0009888	tissue development	107/328	322/1794	4.27e-13	1.01e-09	8.88e-10	12842/21345/12843/12825/17313/16011/14219/76509/13710/20720/110196/12111/12577/22003/17069/16598/268482/55948/17242/56753/109620/17075/14859/53868/12512/22268/13717/16664/12406/22352/12816/54139/16952/20315/15894/13038/12443/74754/19223/21825/319530/17263/20496/50706/224912/56312/14027/18712/11677/15200/64817/67972/216616/16682/19041/12741/15357/14609/74318/16666/66175/52377/71960/20319/16667/115…	107	107	Active	0.211503	1.24734	0.147657	0.544026	0.488748	156	tags=57%, list=46%, signal=45%	Mgp/Serpine2/Igfbp5/Col1a2/Bgn/Tagln/Ccn2/Col1a1/Mdk/Cxcl12/Thbs1/Col12a1/Eln/Tpm1/Col3a1/Cdkn1c/Klf2/Meg3/Spp1/Ctsk/Ptgis/Nupr1/Serpinh1/Cd63/Slc12a2/Vim/Icam1/Rcn3/Tmem100/Tnmd/Postn/Fstl1/Edn3/Tgfb3/Sfrp2/Gpc3/Pdgfra/Twist1/Angpt1/Aqp1/Igf2/Col11a1/Fn1/Ecm1/Ptgs2/Pgf/Wnt5a/Ptn/Mmp2/Col5a2/S100b/Omd/Fzd1/Svep1/Csrp2/Aspn/Sostdc1/Ccn1/Col5a1/Mustn1/Rbp4
TM_all_BP_GO:0072359	TM_all	BP	GO:0072359	circulatory system development	70/328	216/1794	5.98e-08	7.08e-05	6.23e-05	12842/12843/20692/12825/20317/14219/13179/16854/110196/14181/22003/11816/17069/16598/67916/17242/109620/16480/329941/16835/16952/20315/19223/21825/20496/18712/15200/64817/12306/12741/68792/14609/15277/74318/12837/353156/53614/20319/11555/21826/26365/18595/64103/23876/12575/14275/19242/11826/67888/22160/11600/16002/22418/12831/14268/13601/12654/16007/14362/14118/14734/19225/12845/17390/19662/26897…	70	70	Active	0.325467	1.77296	0.00401167	0.102275	0.0918825	161	tags=70%, list=47%, signal=47%	Dcn/Serpinf1/Col1a2/Ccn2/Col1a1/Mdk/Plpp3/Sparc/Cxcl12/Thbs1/Tpm1/Col3a1/Chil1/Klf2/Col8a2/Ptgis/Slc12a2/Fbln5/Col8a1/Tmem100/Tnmd/Thbs2/Apoe/Sfrp2/Gpc3/Srpx2/Reck/Pdgfra/Twist1/Angpt1/Aqp1/Igf2/Col11a1/Fn1/Ecm1/Ptgs2/Fbn1/Pgf/Wnt5a/Ptn/Mmp2/Fzd1/Svep1/Ccn1/Col5a1/Rbp4/Cfh/Ltbp1/Comp
TM_all_BP_GO:0010810	TM_all	BP	GO:0010810	regulation of cell-substrate adhesion	26/328	52/1794	1.29e-07	0.000101622	8.94e-05	12842/11815/76509/20194/64075/16852/17242/56753/320712/16480/67896/17926/21825/50706/76709/14114/20874/60595/12837/107581/18073/20750/140474/19242/14268/16007	26	26	Active	0.449921	1.90502	0.00466679	0.113101	0.101609	93	tags=58%, list=27%, signal=45%	Col1a1/Mdk/Apod/Lgals1/Myoc/Abi3bp/Thbs1/Ccdc80/Smoc1/Spp1/Col8a1/Col16a1/Fbln1/Postn/Nid1
TM_all_BP_GO:0009653	TM_all	BP	GO:0009653	anatomical structure morphogenesis	114/328	424/1794	2.71e-07	0.00016053	0.000141268	12842/12843/20692/12825/17313/16011/20317/14219/13179/76509/11830/13710/16854/20720/14181/20194/12577/22003/11816/17069/16598/64058/268482/67916/17242/56753/109620/53868/12740/16480/53869/17926/329941/12406/16835/22352/12816/78892/16952/20315/15894/19223/21825/20496/192897/50706/224912/18712/15200/64817/76709/12306/12741/14114/68792/60595/14609/15277/74318/16666/12837/353156/71960/53614/20319/166…	114	114	Active	0.270157	1.60634	0.00875593	0.147704	0.132696	156	tags=61%, list=46%, signal=50%	Mgp/Serpine2/Dcn/Serpinf1/Igfbp5/Col1a2/Ccn2/Col1a1/Mdk/Plpp3/Myoc/Sparc/Cxcl12/Thbs1/Col12a1/Tpm1/Col3a1/Chil1/Cdkn1c/Klf2/Col8a2/Crispld2/Ptgis/Serpinh1/Slc12a2/Vim/Icam1/Fbln5/Col8a1/Fbln1/Tmem100/Tnmd/Postn/Thbs2/Emb/Apoe/Tgfb3/Sfrp2/Gpc3/Srpx2/Reck/Pdgfra/Twist1/Angpt1/Clu/Aqp1/Igf2/Chad/Col11a1/Fn1/Ecm1/Ptgs2/Mfap5/Fbn1/Pgf/Wnt5a/Ptn/Nbl1/Mmp2/Col5a2/S100b/Fzd1/Svep1/Csrp2/Aspn/Nr4a2/Sostdc…
TM_all_BP_GO:0031589	TM_all	BP	GO:0031589	cell-substrate adhesion	33/328	78/1794	3.92e-07	0.000185574	0.000163307	12842/12825/11815/14219/76509/20194/64075/16852/17242/56753/320712/12512/16480/67896/17926/21825/192897/50706/223272/76709/14114/20874/60595/12837/72434/107581/18073/20750/140474/19242/11600/14268/16007	33	33	Active	0.46476	2.10371	0.000933881	0.0578629	0.0519835	93	tags=58%, list=27%, signal=46%	Ccn2/Col1a1/Mdk/Apod/Lgals1/Myoc/Abi3bp/Thbs1/Ccdc80/Col3a1/Smoc1/Spp1/Itgbl1/Cd63/Col8a1/Col16a1/Fbln1/Postn/Nid1
TM_all_BP_GO:0007155	TM_all	BP	GO:0007155	cell adhesion	85/328	295/1794	7.34e-07	0.000220102	0.000193692	12842/12825/11815/14219/76509/53624/16854/20720/20194/22003/545370/64058/29817/64075/67916/16852/17242/56753/109620/320712/17075/13507/12512/12740/16480/13512/18772/67896/17926/329941/12816/66824/16952/14012/20315/227753/13506/16858/15894/21825/192897/50706/76293/223272/64817/16008/76709/13510/56460/12741/14114/20874/12484/68792/60595/12837/353156/11555/21826/72434/107581/18073/26365/18595/23876/…	85	85	Active	0.293961	1.66885	0.00870196	0.147704	0.132696	93	tags=40%, list=27%, signal=39%	Serpine2/Ccn2/Col1a1/Mdk/Apod/Plpp3/Igfbp7/Lgals1/Myoc/Abi3bp/Cxcl12/Thbs1/Hmcn1/Col12a1/Ccdc80/Tpm1/Col3a1/Igfbp2/Mfap4/Smoc1/Col8a2/Spp1/Itgbl1/Cd63/Icam1/Fbln5/Col8a1/Col16a1/Fbln1/Col6a1/Postn/Thbs2/Emb/Nid1
TM_all_BP_GO:0009611	TM_all	BP	GO:0009611	response to wounding	43/328	117/1794	7.43e-07	0.000220102	0.000193692	12842/12825/76509/20720/22003/11816/12258/67916/17242/22240/109620/20969/11475/12740/78896/16952/21825/20496/192897/14027/15200/12306/19041/14114/12484/15357/14609/66175/11555/26365/18595/16687/12575/14275/19242/11826/22418/12831/14268/16007/12845/17390/12628	43	43	Active	0.32736	1.58723	0.0288856	0.27948	0.251082	42	tags=26%, list=12%, signal=26%	Serpine2/Col1a1/Mdk/Serping1/Plpp3/Ecrg4/Acta2/Thbs1/Tpm1/Col3a1/Dpysl3
TM_all_BP_GO:0042060	TM_all	BP	GO:0042060	wound healing	35/328	87/1794	7.44e-07	0.000220102	0.000193692	12842/12825/76509/20720/22003/11816/12258/67916/109620/20969/11475/12740/16952/21825/20496/14027/15200/12306/19041/14114/15357/14609/66175/11555/26365/18595/16687/12575/11826/22418/12831/14268/16007/12845/12628	35	35	Active	0.279967	1.28658	0.15581	0.554714	0.49835	41	tags=23%, list=12%, signal=22%	Serpine2/Col1a1/Serping1/Plpp3/Acta2/Thbs1/Tpm1/Col3a1
TM_all_BP_GO:0022610	TM_all	BP	GO:0022610	biological adhesion	85/328	298/1794	1.2e-06	0.000286831	0.000252414	12842/12825/11815/14219/76509/53624/16854/20720/20194/22003/545370/64058/29817/64075/67916/16852/17242/56753/109620/320712/17075/13507/12512/12740/16480/13512/18772/67896/17926/329941/12816/66824/16952/14012/20315/227753/13506/16858/15894/21825/192897/50706/76293/223272/64817/16008/76709/13510/56460/12741/14114/20874/12484/68792/60595/12837/353156/11555/21826/72434/107581/18073/26365/18595/23876/…	85	85	Active	0.293961	1.66885	0.00870196	0.147704	0.132696	93	tags=40%, list=27%, signal=39%	Serpine2/Ccn2/Col1a1/Mdk/Apod/Plpp3/Igfbp7/Lgals1/Myoc/Abi3bp/Cxcl12/Thbs1/Hmcn1/Col12a1/Ccdc80/Tpm1/Col3a1/Igfbp2/Mfap4/Smoc1/Col8a2/Spp1/Itgbl1/Cd63/Icam1/Fbln5/Col8a1/Col16a1/Fbln1/Col6a1/Postn/Thbs2/Emb/Nid1
TM_all_BP_GO:0035295	TM_all	BP	GO:0035295	tube development	70/328	231/1794	1.21e-06	0.000286831	0.000252414	20692/12825/17313/16011/20317/14219/13179/16854/20720/14181/11816/16598/71660/17242/56753/17075/14859/16480/329941/16835/16952/20315/19223/21825/17263/20496/11677/15200/12306/12741/68792/14609/15277/74318/12837/52377/353156/53614/20319/11555/21826/26365/18595/64103/23876/20750/11839/14275/21809/19242/11826/67888/22160/11600/16002/22418/14268/13601/66042/12654/16007/14362/14734/19225/12845/17390/1…	70	70	Active	0.360915	1.96606	0.000729395	0.0570873	0.0512868	105	tags=49%, list=31%, signal=42%	Mgp/Serpine2/Dcn/Serpinf1/Igfbp5/Ccn2/Mdk/Sparc/Cxcl12/Thbs1/Col3a1/Rarres2/Chil1/Klf2/Meg3/Col8a2/Spp1/Ptgis/Slc12a2/Rcn3/Fbln5/Col8a1/Tmem100/Tnmd/Thbs2/Apoe/Tgfb3/Sfrp2/Gpc3/Srpx2/Reck/Pdgfra/Twist1/Angpt1
TM_all_BP_GO:0051270	TM_all	BP	GO:0051270	regulation of cellular component movement	68/328	223/1794	1.39e-06	0.000298588	0.000262761	12842/20692/12825/11815/16011/20317/13179/76509/66166/53624/16854/14181/22003/11816/71660/67916/17242/56753/22240/109620/17075/19241/53868/12512/11475/12740/16480/53869/17926/57277/22352/66824/16952/20315/13506/15894/21825/50706/15200/216616/76709/12741/14114/20874/68792/60595/14609/16666/353156/53614/20319/26365/18595/19242/11826/22160/11600/16002/22418/14268/13616/13601/114886/16007/19225/17390…	68	68	Active	0.271238	1.46794	0.0444323	0.32693	0.293711	43	tags=24%, list=13%, signal=26%	Dcn/Serpinf1/Igfbp5/Col1a1/Mdk/Apod/Plpp3/Acta2/Myoc/Sparc/Cxcl12/Thbs1/Tpm1/Col3a1/Dpysl3/Rarres2
TM_all_BP_GO:0097435	TM_all	BP	GO:0097435	supramolecular fiber organization	47/328	136/1794	1.73e-06	0.000341309	0.000300356	12842/12843/13010/12825/17022/14219/20194/22003/11816/56753/22240/16949/109620/19241/11568/13717/18772/53869/17926/12332/16664/12406/16835/22352/66824/227753/15894/76293/76709/12306/20874/60595/20319/16667/12759/18595/23876/69693/16687/16688/21809/12832/13008/12831/12845/50530/12814	47	47	Active	0.301421	1.499	0.0470827	0.328545	0.295162	109	tags=49%, list=32%, signal=39%	Col1a2/Ccn2/Col1a1/Lum/Myoc/Aebp1/Eln/Tpm1/Col3a1/Dpysl3/Loxl1/Mfap4/Serpinh1/Vim/Icam1/Fbln5/Cst3/Apoe/Tgfb3/Sfrp2/Pdgfra/Gsn/Clu
TM_all_BP_GO:2000145	TM_all	BP	GO:2000145	regulation of cell motility	66/328	216/1794	1.91e-06	0.000347297	0.000305625	12842/20692/12825/11815/16011/20317/13179/76509/66166/53624/16854/14181/22003/11816/71660/67916/17242/56753/22240/17075/19241/53868/12512/11475/12740/16480/53869/17926/57277/22352/66824/16952/20315/15894/21825/50706/15200/216616/76709/12741/14114/20874/68792/60595/14609/16666/353156/53614/20319/26365/18595/19242/11826/22160/11600/16002/22418/14268/13616/13601/114886/16007/19225/17390/17965/18654	66	66	Active	0.287508	1.54962	0.0266083	0.274064	0.246216	139	tags=61%, list=41%, signal=45%	Dcn/Serpinf1/Igfbp5/Col1a1/Mdk/Apod/Plpp3/Acta2/Myoc/Sparc/Cxcl12/Thbs1/Tpm1/Col3a1/Dpysl3/Rarres2/Cd63/Vim/Icam1/Fbln1/Cygb/Postn/Apoe/Edn3/Sfrp2/Srpx2/Reck/Pdgfra/Twist1/Angpt1/Aqp1/Igf2/Fn1/Ecm1/Ptgs2/Pgf/Wnt5a/Ptn/Nbl1/Mmp2
TM_all_BP_GO:0001568	TM_all	BP	GO:0001568	blood vessel development	57/328	178/1794	2.11e-06	0.000355963	0.000313251	12842/12843/20692/12825/20317/14219/13179/16854/14181/11816/16598/67916/17242/16480/329941/16835/16952/20315/19223/21825/20496/15200/12306/12741/68792/14609/15277/12837/353156/53614/20319/11555/21826/26365/18595/64103/23876/14275/19242/11826/67888/11600/16002/22418/12831/14268/13601/12654/16007/14734/19225/12845/17390/268977/12826/12628/18654	57	57	Active	0.387957	2.01262	0.000929714	0.0578629	0.0519835	135	tags=63%, list=39%, signal=46%	Dcn/Serpinf1/Col1a2/Ccn2/Col1a1/Mdk/Plpp3/Sparc/Cxcl12/Thbs1/Col3a1/Chil1/Klf2/Col8a2/Ptgis/Slc12a2/Fbln5/Col8a1/Tmem100/Tnmd/Thbs2/Apoe/Sfrp2/Gpc3/Srpx2/Reck/Pdgfra/Angpt1/Aqp1/Igf2/Fn1/Ecm1/Ptgs2/Pgf/Wnt5a/Ptn
TM_all_BP_GO:0001944	TM_all	BP	GO:0001944	vasculature development	58/328	183/1794	2.47e-06	0.000389615	0.000342866	12842/12843/20692/12825/20317/14219/13179/16854/14181/11816/16598/67916/17242/16480/329941/16835/16952/20315/19223/21825/20496/15200/64817/12306/12741/68792/14609/15277/12837/353156/53614/20319/11555/21826/26365/18595/64103/23876/14275/19242/11826/67888/11600/16002/22418/12831/14268/13601/12654/16007/14734/19225/12845/17390/268977/12826/12628/18654	58	58	Active	0.379583	1.97591	0.000929887	0.0578629	0.0519835	135	tags=62%, list=39%, signal=45%	Dcn/Serpinf1/Col1a2/Ccn2/Col1a1/Mdk/Plpp3/Sparc/Cxcl12/Thbs1/Col3a1/Chil1/Klf2/Col8a2/Ptgis/Slc12a2/Fbln5/Col8a1/Tmem100/Tnmd/Thbs2/Apoe/Sfrp2/Gpc3/Srpx2/Reck/Pdgfra/Angpt1/Aqp1/Igf2/Fn1/Ecm1/Ptgs2/Pgf/Wnt5a/Ptn
TM_all_BP_GO:0030198	TM_all	BP	GO:0030198	extracellular matrix organization	37/328	100/1794	3.99e-06	0.000524678	0.000461722	12842/12843/12825/17022/14219/13710/16854/64075/12821/16949/320712/11568/13717/67896/329941/12406/78892/50706/76293/12306/14114/12837/53614/20319/107581/18073/18595/23876/269959/12832/12831/14268/16007/12845/17390/12826/12814	37	37	Active	0.493598	2.30227	0.000187582	0.0297184	0.0266987	103	tags=65%, list=30%, signal=51%	Col1a2/Ccn2/Col1a1/Lum/Abi3bp/Aebp1/Ccdc80/Eln/Col3a1/Loxl1/Mfap4/Smoc1/Col8a2/Crispld2/Serpinh1/Fbln5/Col8a1/Col16a1/Fbln1/Postn/Nid1/Sfrp2/Reck/Pdgfra
TM_all_BP_GO:0043062	TM_all	BP	GO:0043062	extracellular structure organization	37/328	100/1794	3.99e-06	0.000524678	0.000461722	12842/12843/12825/17022/14219/13710/16854/64075/12821/16949/320712/11568/13717/67896/329941/12406/78892/50706/76293/12306/14114/12837/53614/20319/107581/18073/18595/23876/269959/12832/12831/14268/16007/12845/17390/12826/12814	37	37	Active	0.493598	2.30227	0.000187582	0.0297184	0.0266987	103	tags=65%, list=30%, signal=51%	Col1a2/Ccn2/Col1a1/Lum/Abi3bp/Aebp1/Ccdc80/Eln/Col3a1/Loxl1/Mfap4/Smoc1/Col8a2/Crispld2/Serpinh1/Fbln5/Col8a1/Col16a1/Fbln1/Postn/Nid1/Sfrp2/Reck/Pdgfra
TM_all_BP_GO:0045229	TM_all	BP	GO:0045229	external encapsulating structure organization	37/328	100/1794	3.99e-06	0.000524678	0.000461722	12842/12843/12825/17022/14219/13710/16854/64075/12821/16949/320712/11568/13717/67896/329941/12406/78892/50706/76293/12306/14114/12837/53614/20319/107581/18073/18595/23876/269959/12832/12831/14268/16007/12845/17390/12826/12814	37	37	Active	0.493598	2.30227	0.000187582	0.0297184	0.0266987	103	tags=65%, list=30%, signal=51%	Col1a2/Ccn2/Col1a1/Lum/Abi3bp/Aebp1/Ccdc80/Eln/Col3a1/Loxl1/Mfap4/Smoc1/Col8a2/Crispld2/Serpinh1/Fbln5/Col8a1/Col16a1/Fbln1/Postn/Nid1/Sfrp2/Reck/Pdgfra
TM_all_BP_GO:0001101	TM_all	BP	GO:0001101	response to acid chemical	13/328	20/1794	4.63e-06	0.000562334	0.00049486	12842/12843/12825/20194/16598/11677/12306/107581/18595/12832/12833/17390/12826	13	13	Active	0.406612	1.37472	0.127664	0.506173	0.454742	103	tags=54%, list=30%, signal=39%	Col1a2/Col1a1/Col3a1/Klf2/Col16a1/Col6a1/Pdgfra
TM_all_BP_GO:0040012	TM_all	BP	GO:0040012	regulation of locomotion	66/328	221/1794	4.75e-06	0.000562334	0.00049486	12842/20692/12825/11815/16011/20317/13179/76509/66166/53624/16854/14181/22003/11816/71660/67916/17242/56753/22240/17075/19241/53868/12512/11475/12740/16480/53869/17926/57277/22352/66824/16952/20315/15894/21825/50706/15200/216616/76709/12741/14114/20874/68792/60595/14609/16666/353156/53614/20319/26365/18595/19242/11826/22160/11600/16002/22418/14268/13616/13601/114886/16007/19225/17390/17965/18654	66	66	Active	0.287508	1.54962	0.0266083	0.274064	0.246216	139	tags=61%, list=41%, signal=45%	Dcn/Serpinf1/Igfbp5/Col1a1/Mdk/Apod/Plpp3/Acta2/Myoc/Sparc/Cxcl12/Thbs1/Tpm1/Col3a1/Dpysl3/Rarres2/Cd63/Vim/Icam1/Fbln1/Cygb/Postn/Apoe/Edn3/Sfrp2/Srpx2/Reck/Pdgfra/Twist1/Angpt1/Aqp1/Igf2/Fn1/Ecm1/Ptgs2/Pgf/Wnt5a/Ptn/Nbl1/Mmp2
TM_all_BP_GO:0071229	TM_all	BP	GO:0071229	cellular response to acid chemical	12/328	18/1794	7.52e-06	0.000846762	0.00074516	12842/12843/12825/20194/16598/12306/107581/18595/12832/12833/17390/12826	12	12	Active	0.435816	1.43101	0.0949933	0.440779	0.395992	103	tags=58%, list=30%, signal=42%	Col1a2/Col1a1/Col3a1/Klf2/Col16a1/Col6a1/Pdgfra
TM_all_BP_GO:0030334	TM_all	BP	GO:0030334	regulation of cell migration	63/328	212/1794	9.94e-06	0.00104662	0.000921035	12842/20692/12825/11815/16011/20317/13179/76509/66166/16854/14181/22003/11816/71660/67916/17242/56753/22240/19241/53868/12512/11475/12740/16480/53869/17926/57277/22352/66824/16952/20315/15894/21825/50706/15200/216616/76709/12741/14114/20874/68792/60595/14609/16666/353156/53614/20319/26365/18595/19242/11826/11600/16002/22418/14268/13616/13601/114886/16007/19225/17390/17965/18654	63	63	Active	0.312327	1.6624	0.0129657	0.189196	0.169972	139	tags=62%, list=41%, signal=45%	Dcn/Serpinf1/Igfbp5/Col1a1/Mdk/Apod/Plpp3/Acta2/Myoc/Sparc/Cxcl12/Thbs1/Tpm1/Col3a1/Dpysl3/Rarres2/Cd63/Vim/Icam1/Fbln1/Cygb/Postn/Apoe/Edn3/Sfrp2/Srpx2/Reck/Pdgfra/Angpt1/Aqp1/Igf2/Fn1/Ecm1/Ptgs2/Pgf/Wnt5a/Ptn/Nbl1/Mmp2
TM_all_BP_GO:0034109	TM_all	BP	GO:0034109	homotypic cell-cell adhesion	13/328	21/1794	1.02e-05	0.00104662	0.000921035	20720/67916/16852/109620/16480/13506/12484/11555/26365/18595/14268/12845/12628	13	13	Active	0.395248	1.3363	0.151424	0.549161	0.493362	18	tags=23%, list=5%, signal=23%	Serpine2/Plpp3/Lgals1
TM_all_BP_GO:0050793	TM_all	BP	GO:0050793	regulation of developmental process	104/328	403/1794	1.12e-05	0.0011061	0.000973377	12842/20692/17313/16011/20317/14219/13179/16854/20720/110196/20194/12577/11816/16598/21858/71660/55948/64075/17242/56753/12609/19241/19659/12740/16480/53869/17926/16835/22352/16952/20315/15894/13038/12443/19223/21825/319530/20496/21366/50706/231507/56312/18712/67972/216616/76709/12306/12741/14114/12484/15357/68792/60595/14609/83924/15277/74318/66175/71960/53614/20319/16667/11555/21826/97165/12759…	104	104	Active	0.318962	1.87097	0.00109389	0.0606563	0.0544931	156	tags=63%, list=46%, signal=50%	Mgp/Serpine2/Dcn/Serpinf1/Igfbp5/Ccn2/Col1a1/Mdk/Myoc/Sparc/Timp2/Cxcl12/Thbs1/Rarres2/Chil1/Cebpd/Cdkn1c/Klf2/Smoc1/Ctsk/Ptgis/Nupr1/Slc12a2/Vim/Icam1/Fbln5/Fbln1/Tmem100/Tnmd/Postn/Thbs2/Gpr137b/Apoe/Edn3/Rbp1/Tgfb3/Slc6a6/Sfrp2/Gpc3/Srpx2/Reck/Pdgfra/Twist1/Clu/Aqp1/Igf2/Chad/Fn1/Ecm1/Ptgs2/Fbn1/Fgl2/Pgf/Wnt5a/Ptn/Nbl1/Col5a2/S100b/Omd/Fzd1/Aspn/Sostdc1/Ccn1/Col5a1/Mustn1/Rbp4
TM_all_BP_GO:0010812	TM_all	BP	GO:0010812	negative regulation of cell-substrate adhesion	11/328	16/1794	1.19e-05	0.00113005	0.000994454	12842/11815/76509/16852/56753/17926/21825/50706/14114/60595/140474	11	11	Active	0.535777	1.70762	0.024682	0.264772	0.237868	30	tags=45%, list=9%, signal=43%	Col1a1/Apod/Lgals1/Myoc/Thbs1
TM_all_BP_GO:0060429	TM_all	BP	GO:0060429	epithelium development	62/328	209/1794	1.27e-05	0.00115328	0.0010149	21345/17313/16011/76509/13710/20720/12577/16598/268482/55948/17242/56753/109620/17075/14859/53868/12512/22268/16664/22352/54139/16952/20315/15894/12443/20496/224912/14027/11677/15200/16682/19041/12741/14609/16666/52377/20319/16667/26365/18595/64103/69693/14314/16687/11839/16688/14275/11826/67888/22160/11600/22418/12831/66042/16007/14362/14734/19225/17390/12826/12628/18654	62	62	Active	0.15788	0.836098	0.726048	0.918665	0.82532	11	tags=8%, list=3%, signal=10%	Mgp/Serpine2/Igfbp5/Tagln/Mdk
TM_all_BP_GO:0048870	TM_all	BP	GO:0048870	cell motility	84/328	311/1794	1.72e-05	0.00144859	0.00127477	12842/20692/12825/11815/16011/20317/14219/13179/76509/66166/53624/16854/14181/22003/11816/71660/70045/67916/17242/56753/22240/17075/19241/20969/53868/12512/11475/12740/16480/53869/17926/57277/22352/66824/16952/20315/15894/16012/21825/20496/192897/50706/223272/15200/64817/216616/76709/12741/14114/20874/12484/68792/60595/14609/16666/353156/53614/20319/97165/26365/18595/20750/14314/14275/19242/11826…	84	84	Active	0.29653	1.67808	0.00762943	0.141059	0.126726	105	tags=45%, list=31%, signal=42%	Dcn/Serpinf1/Igfbp5/Ccn2/Col1a1/Mdk/Apod/Plpp3/Acta2/Myoc/Sparc/Cxcl12/Thbs1/Igfbp6/Tpm1/Col3a1/Dpysl3/Rarres2/Spp1/Itgbl1/Cd63/Slc12a2/Vim/Nr2f1/Icam1/Fbln1/Cygb/Postn/Apoe/Fstl1/Edn3/Sfrp2/Gpc3/Srpx2/Reck/Pdgfra/Twist1/Angpt1
TM_all_BP_GO:0051093	TM_all	BP	GO:0051093	negative regulation of developmental process	50/328	159/1794	1.78e-05	0.00144859	0.00127477	20692/16011/20317/13179/11816/16598/17242/56753/16835/16952/13038/12443/21825/319530/20496/50706/231507/216616/12306/12741/14114/12484/60595/14609/83924/74318/20319/11555/21826/26365/64103/23876/11839/12575/21946/19242/12832/22160/16002/22418/12831/13601/20203/66042/66695/14118/14190/19073/19662/12643	50	50	Active	0.264368	1.32956	0.116249	0.491124	0.441221	156	tags=62%, list=46%, signal=39%	Dcn/Serpinf1/Igfbp5/Mdk/Sparc/Thbs1/Klf2/Ctsk/Slc12a2/Fbln5/Fbln1/Tnmd/Postn/Thbs2/Gpr137b/Apoe/Sfrp2/Twist1/Igf2/Chad/Ecm1/Fbn1/Fgl2/Wnt5a/Ptn/Col5a2/S100b/Aspn/Sostdc1/Col5a1/Rbp4
TM_all_BP_GO:0051674	TM_all	BP	GO:0051674	localization of cell	84/328	311/1794	1.72e-05	0.00144859	0.00127477	12842/20692/12825/11815/16011/20317/14219/13179/76509/66166/53624/16854/14181/22003/11816/71660/70045/67916/17242/56753/22240/17075/19241/20969/53868/12512/11475/12740/16480/53869/17926/57277/22352/66824/16952/20315/15894/16012/21825/20496/192897/50706/223272/15200/64817/216616/76709/12741/14114/20874/12484/68792/60595/14609/16666/353156/53614/20319/97165/26365/18595/20750/14314/14275/19242/11826…	84	84	Active	0.29653	1.67808	0.00762943	0.141059	0.126726	105	tags=45%, list=31%, signal=42%	Dcn/Serpinf1/Igfbp5/Ccn2/Col1a1/Mdk/Apod/Plpp3/Acta2/Myoc/Sparc/Cxcl12/Thbs1/Igfbp6/Tpm1/Col3a1/Dpysl3/Rarres2/Spp1/Itgbl1/Cd63/Slc12a2/Vim/Nr2f1/Icam1/Fbln1/Cygb/Postn/Apoe/Fstl1/Edn3/Sfrp2/Gpc3/Srpx2/Reck/Pdgfra/Twist1/Angpt1
TM_all_BP_GO:0001503	TM_all	BP	GO:0001503	ossification	30/328	79/1794	1.95e-05	0.00153543	0.00135119	12842/12843/17313/16011/14219/64075/17242/12609/17926/67972/14609/20319/11555/20750/11839/19242/20256/22160/16002/22418/13601/27047/66695/16007/14362/14734/19225/12845/19073/17390	30	30	Active	0.478894	2.11179	0.000746408	0.0570873	0.0512868	153	tags=80%, list=45%, signal=48%	Mgp/Igfbp5/Col1a2/Ccn2/Col1a1/Mdk/Myoc/Cebpd/Smoc1/Spp1/Sfrp2/Gpc3/Twist1/Igf2/Ecm1/Ptgs2/Clec11a/Wnt5a/Ptn/Mmp2/Omd/Fzd1/Aspn/Ccn1
TM_all_BP_GO:0051271	TM_all	BP	GO:0051271	negative regulation of cellular component movement	25/328	61/1794	2.17e-05	0.00165967	0.00146053	12825/11815/16011/20317/13179/22003/11816/56753/22240/12512/16480/57277/20315/21825/12741/14114/60595/14609/16666/353156/53614/20319/19242/114886/17965	25	25	Active	0.43368	1.81152	0.00861907	0.147704	0.132696	102	tags=60%, list=30%, signal=45%	Dcn/Serpinf1/Igfbp5/Apod/Cxcl12/Thbs1/Tpm1/Col3a1/Dpysl3/Cd63/Fbln1/Cygb/Apoe/Sfrp2/Reck
TM_all_BP_GO:1903034	TM_all	BP	GO:1903034	regulation of response to wounding	19/328	41/1794	2.83e-05	0.00209243	0.00184136	20720/11816/12258/67916/17242/11475/12740/16952/21825/20496/15200/12306/12484/15357/14609/11555/26365/18595/19242	19	19	Active	0.446153	1.70935	0.0186206	0.218928	0.196683	30	tags=32%, list=9%, signal=31%	Serpine2/Mdk/Serping1/Plpp3/Acta2/Thbs1
TM_all_BP_GO:0007167	TM_all	BP	GO:0007167	enzyme linked receptor protein signaling pathway	47/328	149/1794	3.01e-05	0.0020951	0.00184371	12842/12843/12825/11815/16011/14219/13179/14181/16010/71660/65112/12512/239463/17926/22352/16012/21825/17263/15200/64817/216616/16008/12741/20319/26365/18595/64103/14314/11839/14275/21809/67888/11600/16002/22418/56213/66042/66695/16007/14362/14118/14734/12845/17965/268977/12826/18654	47	47	Active	0.454443	2.26	0.000184638	0.0297184	0.0266987	164	tags=83%, list=48%, signal=50%	Dcn/Igfbp5/Col1a2/Ccn2/Col1a1/Apod/Igfbp4/Myoc/Thbs1/Igfbp6/Col3a1/Rarres2/Igfbp2/Pmepa1/Meg3/Cd63/Vim/Tmem100/Tnmd/Fstl1/Tgfb3/Sfrp2/Gpc3/Pdgfra/Angpt1/Igf2/Fbn1/Pgf/Wnt5a/Htra1/Nbl1/Fzd1/Svep1/Aspn/Sostdc1/Ccn1/Ltbp1/Comp/Col4a1
TM_all_BP_GO:0048514	TM_all	BP	GO:0048514	blood vessel morphogenesis	51/328	166/1794	3e-05	0.0020951	0.00184371	20692/12825/20317/14219/13179/16854/14181/11816/16598/17242/16480/329941/16835/16952/20315/19223/21825/20496/15200/12306/12741/68792/14609/15277/12837/353156/53614/20319/11555/21826/26365/18595/64103/23876/14275/19242/11826/67888/11600/16002/22418/14268/13601/12654/16007/19225/12845/17390/12826/12628/18654	51	51	Active	0.36292	1.83636	0.00296296	0.0959356	0.0861877	139	tags=65%, list=41%, signal=45%	Dcn/Serpinf1/Ccn2/Mdk/Sparc/Cxcl12/Thbs1/Col3a1/Chil1/Klf2/Col8a2/Ptgis/Slc12a2/Fbln5/Col8a1/Tmem100/Tnmd/Thbs2/Apoe/Sfrp2/Srpx2/Reck/Pdgfra/Angpt1/Aqp1/Igf2/Fn1/Ecm1/Ptgs2/Pgf/Wnt5a/Ptn/Mmp2
TM_all_BP_GO:0016477	TM_all	BP	GO:0016477	cell migration	82/328	306/1794	3.15e-05	0.00212939	0.00187389	12842/20692/12825/11815/16011/20317/14219/13179/76509/66166/16854/14181/22003/11816/71660/70045/67916/17242/56753/22240/19241/20969/53868/12512/11475/12740/16480/53869/17926/57277/22352/66824/16952/20315/15894/16012/21825/20496/192897/50706/223272/15200/64817/216616/76709/12741/14114/20874/12484/68792/60595/14609/16666/353156/53614/20319/97165/26365/18595/20750/14314/14275/19242/11826/22160/18227…	82	82	Active	0.318249	1.79275	0.00328647	0.0959356	0.0861877	105	tags=46%, list=31%, signal=42%	Dcn/Serpinf1/Igfbp5/Ccn2/Col1a1/Mdk/Apod/Plpp3/Acta2/Myoc/Sparc/Cxcl12/Thbs1/Igfbp6/Tpm1/Col3a1/Dpysl3/Rarres2/Spp1/Itgbl1/Cd63/Slc12a2/Vim/Nr2f1/Icam1/Fbln1/Cygb/Postn/Apoe/Fstl1/Edn3/Sfrp2/Gpc3/Srpx2/Reck/Pdgfra/Twist1/Angpt1
TM_all_BP_GO:0001501	TM_all	BP	GO:0001501	skeletal system development	32/328	89/1794	3.74e-05	0.00245646	0.00216171	12842/12843/20692/17313/14219/16854/12111/12577/17242/17926/12406/13038/21825/216616/12306/14609/66175/20319/18595/21809/12832/22160/22418/13601/16007/14118/12845/17390/19662/12643/12628/12814	32	32	Active	0.47445	2.12339	0.000565291	0.0527794	0.0474165	161	tags=88%, list=47%, signal=51%	Mgp/Col1a2/Bgn/Ccn2/Col1a1/Mdk/Myoc/Sparc/Thbs1/Cdkn1c/Ctsk/Serpinh1/Tgfb3/Sfrp2/Pdgfra/Twist1/Chad/Col11a1/Ecm1/Fbn1/Wnt5a/Mmp2/Col5a2/Ccn1/Mustn1/Rbp4/Cfh/Comp
TM_all_BP_GO:0040013	TM_all	BP	GO:0040013	negative regulation of locomotion	25/328	63/1794	4.21e-05	0.00268977	0.00236703	12825/11815/16011/20317/13179/22003/11816/56753/22240/12512/16480/57277/20315/21825/12741/14114/14609/16666/353156/53614/20319/19242/22418/114886/17965	25	25	Active	0.433829	1.81215	0.00861907	0.147704	0.132696	102	tags=60%, list=30%, signal=45%	Dcn/Serpinf1/Igfbp5/Apod/Cxcl12/Thbs1/Tpm1/Col3a1/Dpysl3/Cd63/Fbln1/Cygb/Apoe/Sfrp2/Reck
TM_all_BP_GO:0006928	TM_all	BP	GO:0006928	movement of cell or subcellular component	91/328	352/1794	4.85e-05	0.0029518	0.00259761	12842/20692/12825/11815/16011/20317/14219/13179/76509/66166/53624/16854/14181/22003/11816/71660/70045/67916/17242/56753/22240/109620/17075/19241/20969/53868/12512/11475/12740/16480/53869/17926/57277/22352/66824/16952/20315/227753/13506/15894/16012/21825/20496/192897/50706/223272/15200/64817/216616/76709/67749/12741/14114/20874/12484/68792/60595/14609/16666/353156/71960/53614/20319/72434/97165/263…	91	91	Active	0.268659	1.5441	0.0188611	0.220178	0.197806	107	tags=44%, list=31%, signal=41%	Dcn/Serpinf1/Igfbp5/Ccn2/Col1a1/Mdk/Apod/Plpp3/Acta2/Myoc/Sparc/Cxcl12/Thbs1/Igfbp6/Tpm1/Col3a1/Dpysl3/Rarres2/Spp1/Itgbl1/Cd63/Slc12a2/Vim/Nr2f1/Icam1/Fbln1/Cygb/Postn/Emb/Apoe/Fstl1/Edn3/Sfrp2/Gpc3/Srpx2/Reck/Pdgfra/Twist1/Angpt1/Gsn
TM_all_BP_GO:0040007	TM_all	BP	GO:0040007	growth	45/328	143/1794	4.87e-05	0.0029518	0.00259761	16011/20720/110196/12577/16010/11816/17069/16598/21881/29817/55948/17242/53869/16952/20315/21825/17263/20496/50706/231507/18712/15200/16008/14609/74318/13057/66175/20319/16667/11555/18595/23876/23945/11839/12575/21809/19242/16002/22418/231382/14268/13601/14734/12845/19662	45	45	Active	0.26529	1.30523	0.135366	0.523993	0.47075	123	tags=51%, list=36%, signal=38%	Serpine2/Igfbp5/Mdk/Igfbp7/Igfbp4/Cxcl12/Thbs1/Igfbp2/Cdkn1c/Klf2/Meg3/Slc12a2/Fbln5/Postn/Apoe/Tgfb3/Sfrp2/Gpc3/Pdgfra/Igf2/Cyba/Fn1/Ecm1
TM_all_BP_GO:2000146	TM_all	BP	GO:2000146	negative regulation of cell motility	24/328	60/1794	5.17e-05	0.00305746	0.0026906	12825/11815/16011/20317/13179/22003/11816/56753/22240/12512/16480/57277/20315/21825/12741/14114/14609/16666/353156/53614/20319/19242/114886/17965	24	24	Active	0.44982	1.85535	0.00640784	0.129205	0.116077	102	tags=62%, list=30%, signal=47%	Dcn/Serpinf1/Igfbp5/Apod/Cxcl12/Thbs1/Tpm1/Col3a1/Dpysl3/Cd63/Fbln1/Cygb/Apoe/Sfrp2/Reck
TM_all_BP_GO:0007162	TM_all	BP	GO:0007162	negative regulation of cell adhesion	25/328	64/1794	5.76e-05	0.00316925	0.00278898	12842/11815/76509/53624/16854/20720/16852/17242/56753/17075/17926/16952/20315/16858/21825/50706/14114/12484/60595/11555/26365/140474/11600/14190/17390	25	25	Active	0.407593	1.70255	0.0185497	0.218928	0.196683	30	tags=32%, list=9%, signal=31%	Serpine2/Col1a1/Mdk/Apod/Lgals1/Myoc/Cxcl12/Thbs1
TM_all_BP_GO:0010811	TM_all	BP	GO:0010811	positive regulation of cell-substrate adhesion	17/328	36/1794	5.63e-05	0.00316925	0.00278898	20194/64075/17242/320712/16480/67896/17926/21825/76709/14114/12837/107581/18073/20750/19242/14268/16007	17	17	Active	0.494131	1.8292	0.00887965	0.147704	0.132696	93	tags=65%, list=27%, signal=50%	Mdk/Myoc/Abi3bp/Thbs1/Ccdc80/Smoc1/Spp1/Col8a1/Col16a1/Fbln1/Nid1
TM_all_BP_GO:0032963	TM_all	BP	GO:0032963	collagen metabolic process	16/328	33/1794	6.28e-05	0.00329958	0.00290367	12842/12843/14219/12406/22352/13038/54683/76293/52377/21809/12831/14268/114886/17390/268977/14789	16	16	Active	0.512943	1.86331	0.00584465	0.124672	0.112004	97	tags=62%, list=28%, signal=47%	Col1a2/Ccn2/Col1a1/Mfap4/Ctsk/Serpinh1/Vim/Rcn3/Cygb/Tgfb3
TM_all_BP_GO:0061041	TM_all	BP	GO:0061041	regulation of wound healing	16/328	33/1794	6.28e-05	0.00329958	0.00290367	20720/11816/12258/67916/11475/12740/16952/21825/20496/15200/12306/15357/14609/11555/26365/18595	16	16	Active	0.431951	1.5691	0.0465686	0.328545	0.295162	30	tags=31%, list=9%, signal=30%	Serpine2/Serping1/Plpp3/Acta2/Thbs1
TM_all_BP_GO:0001525	TM_all	BP	GO:0001525	angiogenesis	45/328	145/1794	7.16e-05	0.00367946	0.00323796	20692/20317/14219/13179/16854/14181/16598/17242/16480/329941/16952/20315/19223/21825/20496/15200/12306/12741/68792/15277/12837/353156/53614/20319/11555/21826/26365/18595/64103/23876/19242/11826/67888/11600/16002/22418/14268/13601/12654/16007/19225/17390/12826/12628/18654	45	45	Active	0.385273	1.89555	0.00167348	0.0727802	0.0653851	139	tags=69%, list=41%, signal=47%	Dcn/Serpinf1/Ccn2/Mdk/Sparc/Cxcl12/Thbs1/Chil1/Klf2/Col8a2/Ptgis/Slc12a2/Fbln5/Col8a1/Tmem100/Tnmd/Thbs2/Sfrp2/Srpx2/Reck/Pdgfra/Angpt1/Aqp1/Igf2/Fn1/Ecm1/Ptgs2/Pgf/Wnt5a/Ptn/Mmp2
TM_all_BP_GO:0030199	TM_all	BP	GO:0030199	collagen fibril organization	13/328	24/1794	7.31e-05	0.00367946	0.00323796	12842/12843/12825/17022/16949/11568/12406/12306/20319/12832/12831/12845/12814	13	13	Active	0.56575	1.91275	0.00433717	0.109117	0.0980296	64	tags=54%, list=19%, signal=45%	Col1a2/Col1a1/Lum/Aebp1/Col3a1/Loxl1/Serpinh1
TM_all_BP_GO:0040011	TM_all	BP	GO:0040011	locomotion	86/328	332/1794	7.9e-05	0.00389299	0.00342587	12842/20692/12825/11815/16011/20317/14219/13179/76509/66166/53624/16854/14181/22003/11816/71660/70045/67916/17242/56753/22240/17075/19241/20969/53868/12512/11475/12740/16480/53869/17926/57277/22352/66824/16952/20315/15894/16012/21825/20496/192897/50706/223272/15200/64817/216616/76709/12741/14114/20874/12484/68792/60595/14609/16666/353156/53614/20319/97165/26365/18595/20750/14314/14275/19242/11826…	86	86	Active	0.29957	1.70287	0.00654665	0.129647	0.116474	105	tags=45%, list=31%, signal=42%	Dcn/Serpinf1/Igfbp5/Ccn2/Col1a1/Mdk/Apod/Plpp3/Acta2/Myoc/Sparc/Cxcl12/Thbs1/Igfbp6/Tpm1/Col3a1/Dpysl3/Rarres2/Spp1/Itgbl1/Cd63/Slc12a2/Vim/Nr2f1/Icam1/Fbln1/Cygb/Postn/Emb/Apoe/Fstl1/Edn3/Sfrp2/Gpc3/Srpx2/Reck/Pdgfra/Twist1/Angpt1
TM_all_BP_GO:0035239	TM_all	BP	GO:0035239	tube morphogenesis	58/328	203/1794	8.81e-05	0.00416757	0.00366751	20692/12825/17313/20317/14219/13179/16854/14181/11816/16598/17242/56753/16480/329941/16835/16952/20315/19223/21825/20496/15200/12306/12741/68792/14609/15277/12837/353156/53614/20319/11555/21826/26365/18595/64103/23876/11839/14275/19242/11826/67888/22160/11600/16002/22418/14268/13601/66042/12654/16007/14362/14734/19225/12845/17390/12826/12628/18654	58	58	Active	0.347064	1.80663	0.00353357	0.0959356	0.0861877	135	tags=60%, list=39%, signal=44%	Mgp/Dcn/Serpinf1/Ccn2/Mdk/Sparc/Cxcl12/Thbs1/Col3a1/Chil1/Klf2/Col8a2/Ptgis/Slc12a2/Fbln5/Col8a1/Tmem100/Tnmd/Thbs2/Apoe/Sfrp2/Gpc3/Srpx2/Reck/Pdgfra/Twist1/Angpt1/Aqp1/Igf2/Fn1/Ecm1/Ptgs2/Pgf/Wnt5a/Ptn
TM_all_BP_GO:0070887	TM_all	BP	GO:0070887	cellular response to chemical stimulus	110/328	450/1794	8.79e-05	0.00416757	0.00366751	12842/12843/20692/12825/14873/16011/14219/13179/11830/66166/16854/14181/21859/20194/17069/16598/18542/21858/71660/70045/11828/14860/17242/26388/65112/14859/12512/112407/23849/16480/17750/12332/16835/22352/66824/16952/20315/227753/15894/12443/66141/19223/21825/14858/14081/20496/54683/50706/18712/11677/15200/67972/76709/67749/68655/12306/12741/54484/67865/12484/15357/60595/14609/15277/13057/20319/1…	110	110	Active	0.186904	1.10661	0.303173	0.704517	0.632932	140	tags=50%, list=41%, signal=44%	Dcn/Igfbp5/Col1a2/Ccn2/Col1a1/Mdk/Pcolce/Sparc/Timp2/Cxcl12/Thbs1/Timp3/Col3a1/Rarres2/Pmepa1/Klf2/Fndc1/Spp1/Ptgis/Cd63/Slc12a2/Vim/Icam1/Fbln5/Col16a1/Tmem100/Col6a1/Tnmd/Postn/Fstl1/Edn3/Tgfb3/Sfrp2/Gpc3/Pdgfra/Twist1/Angpt1/Gsn/Clu/Aqp1/Igf2/Cyba/Ifitm3/Fn1/Ecm1/Ptgs2/Fbn1/Pgf/Wnt5a/Ptn/Htra1/Cxcl1/Nbl1/Mmp2/Col5a2
TM_all_BP_GO:0001667	TM_all	BP	GO:0001667	ameboidal-type cell migration	32/328	93/1794	0.000101384	0.00468204	0.00412025	20692/20317/13179/14181/11816/67916/56753/53868/12512/11475/16480/53869/16952/20315/21825/192897/15200/68792/14609/16666/26365/14314/14275/11826/22160/11600/16002/22418/14268/13616/114886/19225	32	32	Active	0.32932	1.47387	0.0597324	0.36339	0.326466	124	tags=59%, list=36%, signal=42%	Dcn/Serpinf1/Plpp3/Acta2/Sparc/Cxcl12/Thbs1/Cd63/Cygb/Apoe/Fstl1/Edn3/Srpx2/Twist1/Angpt1/Aqp1/Igf2/Fn1/Ptgs2
TM_all_BP_GO:0009719	TM_all	BP	GO:0009719	response to endogenous stimulus	58/328	204/1794	0.000102902	0.00468204	0.00412025	12842/12843/12825/16011/14219/14181/21859/11816/21858/71660/65112/11670/16480/11522/16835/22352/16952/15894/12443/21825/14081/67972/76709/67749/208715/12741/12484/14609/20319/11555/107581/97165/18595/20750/14314/11839/14275/21809/12832/12833/11826/67888/18227/16002/22418/56213/66042/66695/16007/14362/14118/14734/12845/17390/19662/17965/268977/12826	58	58	Active	0.273917	1.42587	0.0619304	0.369252	0.331733	164	tags=67%, list=48%, signal=42%	Igfbp5/Col1a2/Ccn2/Col1a1/Timp2/Thbs1/Timp3/Col3a1/Rarres2/Pmepa1/Spp1/Vim/Icam1/Col16a1/Tmem100/Col6a1/Apoe/Fstl1/Tgfb3/Sfrp2/Gpc3/Pdgfra/Aqp1/Igf2/Fbn1/Wnt5a/Htra1/Nbl1/Mmp2/Col5a2/Fzd1/Aspn/Nr4a2/Sostdc1/Ccn1/Rbp4/Ltbp1/Comp/Col4a1
TM_all_BP_GO:0042127	TM_all	BP	GO:0042127	regulation of cell population proliferation	83/328	320/1794	0.000105136	0.00469341	0.00413025	20692/13010/11815/16011/20317/14219/53624/16854/20720/14181/11816/21858/55948/17242/56753/17075/11670/53868/112407/16480/57277/78896/22352/54139/66824/16952/20315/16858/12443/74754/66141/20195/21825/231507/56312/18712/11677/15200/216616/16008/20775/16682/12306/12741/14114/12484/15357/14609/13057/66175/353156/20319/11555/97165/12759/26365/18595/64103/23876/11839/12575/21809/19242/20256/11826/22160…	83	83	Active	0.181092	1.02155	0.431333	0.78195	0.702497	141	tags=52%, list=41%, signal=40%	Serpine2/Serpinf1/Igfbp5/Ccn2/Mdk/Apod/Ecrg4/Sparc/Timp2/Cxcl12/Thbs1/Igfbp2/Nupr1/Vim/Fbln5/Fbln1/Tnmd/Cst3/Apoe/Edn3/Tgfb3/Sfrp2/Gpc3/Pdgfra/Twist1/Angpt1/Clu/Aqp1/Igf2/Cyba/Ifitm3/Fn1/Ecm1/Ptgs2/Clec11a/Pgf/P3h3/Wnt5a/Ptn/Htra1/Cxcl1/Mmp2/S100b
TM_all_BP_GO:1901698	TM_all	BP	GO:1901698	response to nitrogen compound	38/328	118/1794	0.000115227	0.00504865	0.00444287	12842/12843/12825/16011/20317/11816/17069/71660/11670/16480/16835/22352/16952/15894/12443/21825/67972/76709/67749/208715/26557/67865/14609/52377/75744/11555/107581/18595/110454/14275/12832/12833/11826/18227/16002/17390/19662/12826	38	38	Active	0.241251	1.13216	0.294316	0.695199	0.624561	83	tags=32%, list=24%, signal=27%	Serpinf1/Igfbp5/Col1a2/Col1a1/Thbs1/Col3a1/Rarres2/Vim/Icam1/Rcn3/Col16a1/Col6a1
TM_all_BP_GO:0030336	TM_all	BP	GO:0030336	negative regulation of cell migration	23/328	59/1794	0.000119786	0.00515299	0.00453469	12825/11815/16011/20317/13179/22003/11816/56753/22240/12512/16480/57277/20315/21825/12741/14609/16666/353156/53614/20319/19242/114886/17965	23	23	Active	0.454575	1.85863	0.00823045	0.147704	0.132696	42	tags=39%, list=12%, signal=37%	Dcn/Serpinf1/Igfbp5/Apod/Cxcl12/Thbs1/Tpm1/Col3a1/Dpysl3
TM_all_BP_GO:0031214	TM_all	BP	GO:0031214	biomineral tissue development	17/328	38/1794	0.00013161	0.00536877	0.00472458	12842/12843/17313/67972/14609/11555/20750/19242/22160/13601/27047/66695/16007/14734/19225/12845/19073	17	17	Active	0.406412	1.50447	0.0665029	0.383126	0.344197	161	tags=76%, list=47%, signal=43%	Mgp/Col1a2/Col1a1/Spp1/Gpc3/Twist1/Ecm1/Ptgs2/Ptn/Omd/Aspn/Ccn1/Comp
TM_all_BP_GO:0032964	TM_all	BP	GO:0032964	collagen biosynthetic process	12/328	22/1794	0.000128639	0.00536877	0.00472458	12842/14219/12406/22352/54683/52377/21809/12831/14268/114886/268977/14789	12	12	Active	0.485647	1.59463	0.044546	0.32693	0.293711	160	tags=92%, list=47%, signal=51%	Ccn2/Col1a1/Serpinh1/Vim/Rcn3/Cygb/Tgfb3/Fn1/P3h3/Col5a1/Ltbp1
TM_all_BP_GO:0110148	TM_all	BP	GO:0110148	biomineralization	17/328	38/1794	0.00013161	0.00536877	0.00472458	12842/12843/17313/67972/14609/11555/20750/19242/22160/13601/27047/66695/16007/14734/19225/12845/19073	17	17	Active	0.406412	1.50447	0.0665029	0.383126	0.344197	161	tags=76%, list=47%, signal=43%	Mgp/Col1a2/Col1a1/Spp1/Gpc3/Twist1/Ecm1/Ptgs2/Ptn/Omd/Aspn/Ccn1/Comp
TM_all_BP_GO:0008284	TM_all	BP	GO:0008284	positive regulation of cell population proliferation	58/328	206/1794	0.000139632	0.00559948	0.0049276	13010/16011/14219/53624/16854/14181/17242/17075/11670/53868/22352/66824/16952/20315/12443/21825/231507/18712/11677/15200/216616/16008/12306/12741/14114/12484/15357/14609/13057/66175/353156/20319/11555/97165/12759/26365/18595/23876/11839/12575/21809/19242/20256/11826/22160/16002/22418/56213/14268/13616/13601/20203/16007/14825/19225/12845/17390/18654	58	58	Active	0.154945	0.806561	0.761019	0.938612	0.843241	141	tags=52%, list=41%, signal=37%	Igfbp5/Ccn2/Mdk/Cxcl12/Thbs1/Igfbp2/Vim/Fbln5/Fbln1/Cst3/Edn3/Tgfb3/Sfrp2/Pdgfra/Twist1/Clu/Aqp1/Igf2/Cyba/Fn1/Ecm1/Ptgs2/Clec11a/Pgf/Wnt5a/Ptn/Htra1/Cxcl1/Mmp2/S100b
TM_all_BP_GO:0007178	TM_all	BP	GO:0007178	transmembrane receptor protein serine/threonine kinase signaling pathway	23/328	60/1794	0.000162117	0.00629022	0.00553546	12843/12825/65112/22352/21825/17263/12741/20319/14314/14275/21809/67888/22418/56213/66042/66695/16007/14362/14118/14734/12845/17965/268977	23	23	Active	0.506088	2.06925	0.00130939	0.067832	0.0609397	161	tags=91%, list=47%, signal=52%	Col1a2/Thbs1/Col3a1/Pmepa1/Meg3/Vim/Tmem100/Fstl1/Tgfb3/Sfrp2/Gpc3/Fbn1/Wnt5a/Htra1/Nbl1/Fzd1/Aspn/Sostdc1/Ccn1/Ltbp1/Comp
TM_all_BP_GO:0051241	TM_all	BP	GO:0051241	negative regulation of multicellular organismal process	58/328	207/1794	0.000162174	0.00629022	0.00553546	20692/11815/16011/20317/13179/20720/11812/11816/16598/12258/17242/56753/12512/16480/16835/66824/16952/16858/13038/21825/319530/20496/231507/67972/216616/26557/12306/12741/14114/12484/15357/14609/83924/13057/19696/20319/11555/21826/26365/18595/64103/23876/21809/21946/19242/22160/11600/22418/14268/13601/66042/66695/14118/19225/14190/19073/17390/19662	58	58	Active	0.302304	1.57363	0.0239911	0.260844	0.23434	139	tags=57%, list=41%, signal=41%	Serpine2/Dcn/Serpinf1/Igfbp5/Mdk/Apod/Serping1/Sparc/Thbs1/Klf2/Ctsk/Cd63/Slc12a2/Fbln5/Fbln1/Tnmd/Thbs2/Gpr137b/Apoe/Tgfb3/Sfrp2/Pdgfra/Twist1/Angpt1/Cyba/Fn1/Ecm1/Ptgs2/Fbn1/Fgl2/Wnt5a/Ptn/Mmp2
TM_all_BP_GO:0030155	TM_all	BP	GO:0030155	regulation of cell adhesion	49/328	167/1794	0.00016515	0.00630233	0.00554611	12842/11815/76509/53624/16854/20720/20194/22003/64075/67916/16852/17242/56753/320712/17075/12512/16480/67896/17926/66824/16952/20315/227753/16858/15894/21825/50706/16008/76709/14114/20874/12484/60595/12837/11555/107581/18073/26365/20750/140474/19242/75697/11600/16002/22418/14268/16007/14190/17390	49	49	Active	0.336949	1.68887	0.0109057	0.167979	0.15091	80	tags=41%, list=23%, signal=36%	Serpine2/Col1a1/Mdk/Apod/Plpp3/Lgals1/Myoc/Abi3bp/Cxcl12/Thbs1/Ccdc80/Tpm1/Igfbp2/Smoc1/Spp1/Cd63/Icam1/Col8a1/Col16a1/Fbln1
TM_all_BP_GO:0043200	TM_all	BP	GO:0043200	response to amino acid	9/328	14/1794	0.000174197	0.00643985	0.00566713	12842/12843/12825/107581/18595/12832/12833/17390/12826	9	9	Active	0.554495	1.63723	0.0335185	0.27948	0.251082	140	tags=89%, list=41%, signal=54%	Col1a2/Col1a1/Col3a1/Col16a1/Col6a1/Pdgfra/Mmp2/Col5a2
TM_all_BP_GO:0071230	TM_all	BP	GO:0071230	cellular response to amino acid stimulus	9/328	14/1794	0.000174197	0.00643985	0.00566713	12842/12843/12825/107581/18595/12832/12833/17390/12826	9	9	Active	0.554495	1.63723	0.0335185	0.27948	0.251082	140	tags=89%, list=41%, signal=54%	Col1a2/Col1a1/Col3a1/Col16a1/Col6a1/Pdgfra/Mmp2/Col5a2
TM_all_BP_GO:0090287	TM_all	BP	GO:0090287	regulation of cellular response to growth factor stimulus	21/328	53/1794	0.000182044	0.00662641	0.00583131	13179/14181/65112/12512/21825/20319/64103/14314/14275/21809/11600/22418/56213/66042/66695/16007/14362/14118/14734/17965/268977	21	21	Active	0.455676	1.80558	0.0108324	0.167979	0.15091	160	tags=90%, list=47%, signal=51%	Dcn/Thbs1/Pmepa1/Cd63/Tnmd/Fstl1/Tgfb3/Sfrp2/Gpc3/Angpt1/Fbn1/Wnt5a/Htra1/Nbl1/Fzd1/Aspn/Sostdc1/Ccn1/Ltbp1
TM_all_BP_GO:0009887	TM_all	BP	GO:0009887	animal organ morphogenesis	51/328	177/1794	0.000199741	0.0071604	0.00630123	12842/12843/12825/16011/14219/11830/13710/22003/17069/64058/17242/56753/109620/329941/12406/21825/20496/192897/18712/14609/12837/20319/26365/18595/11839/14275/21809/19242/12832/11826/67888/22160/11600/16002/22418/12831/66042/66695/17364/16007/14362/14734/12845/50530/17390/19662/17965/12643/12628/12814/18654	51	51	Active	0.317713	1.60761	0.0196296	0.224065	0.201298	161	tags=75%, list=47%, signal=46%	Igfbp5/Col1a2/Ccn2/Col1a1/Mdk/Thbs1/Tpm1/Col3a1/Col8a2/Serpinh1/Slc12a2/Col8a1/Tmem100/Tgfb3/Sfrp2/Gpc3/Pdgfra/Twist1/Angpt1/Aqp1/Igf2/Chad/Col11a1/Mfap5/Pgf/Wnt5a/Ptn/Nbl1/Mmp2/Col5a2/Fzd1/Aspn/Sostdc1/Ccn1/Col5a1/Rbp4/Cfh/Comp
TM_all_BP_GO:1903035	TM_all	BP	GO:1903035	negative regulation of response to wounding	13/328	26/1794	0.000213342	0.00731547	0.00643769	20720/11816/12258/17242/21825/20496/12306/12484/15357/14609/11555/26365/18595	13	13	Active	0.474707	1.60494	0.0384688	0.301497	0.270863	30	tags=31%, list=9%, signal=29%	Serpine2/Mdk/Serping1/Thbs1
TM_all_BP_GO:0030282	TM_all	BP	GO:0030282	bone mineralization	15/328	33/1794	0.000267021	0.00902529	0.00794235	12843/17313/67972/14609/11555/19242/22160/13601/27047/66695/16007/14734/19225/12845/19073	15	15	Active	0.386726	1.37151	0.1277	0.506173	0.454742	198	tags=93%, list=58%, signal=41%	Mgp/Col1a2/Gpc3/Twist1/Ecm1/Ptgs2/Ptn/Omd/Aspn/Ccn1/Comp/Srgn/Gja1/Adrb2
TM_all_BP_GO:0010033	TM_all	BP	GO:0010033	response to organic substance	105/328	436/1794	0.000275344	0.00917556	0.00807459	12842/12843/20692/12825/16011/20317/14219/13179/66166/14181/21859/11816/17069/18542/21858/71660/11828/26388/65112/11670/11529/19659/12512/112407/23849/16480/11522/12332/16835/22352/66824/16952/20315/227753/15894/12443/66141/21825/14858/14081/20496/18712/11677/319554/67972/76709/20775/67749/208715/26557/12741/14933/54484/67865/12484/15357/60595/14609/15277/13057/52377/19696/20319/75744/11555/10758…	105	105	Active	0.200333	1.17739	0.218205	0.624488	0.561035	161	tags=57%, list=47%, signal=44%	Dcn/Serpinf1/Igfbp5/Col1a2/Ccn2/Col1a1/Pcolce/Sparc/Timp2/Cxcl12/Thbs1/Timp3/Col3a1/Rarres2/Pmepa1/Spp1/Cd63/Slc12a2/Vim/Icam1/Rcn3/Col16a1/Tmem100/Col6a1/Tnmd/Apoe/Fstl1/Rbp1/Tgfb3/Sfrp2/Gpc3/Pdgfra/Angpt1/Gsn/Clu/Aqp1/Igf2/Cyba/Ifitm3/Fn1/Ecm1/Ptgs2/Fbn1/Pgf/Wnt5a/Htra1/Cxcl1/Nbl1/Mmp2/Col5a2/Fzd1/Aspn/Nr4a2/Sostdc1/Ccn1/Rbp4/Lsp1/Cfh/Ltbp1/Comp
TM_all_BP_GO:0003007	TM_all	BP	GO:0003007	heart morphogenesis	17/328	40/1794	0.000283293	0.00930932	0.0081923	22003/17069/109620/21825/18712/14609/20319/14275/67888/22160/11600/22418/12831/16007/14362/19662/12814	17	17	Active	0.256906	0.951027	0.515964	0.828585	0.744393	156	tags=71%, list=46%, signal=40%	Thbs1/Tpm1/Tmem100/Sfrp2/Twist1/Angpt1/Col11a1/Wnt5a/Fzd1/Ccn1/Col5a1/Rbp4
TM_all_BP_GO:0043588	TM_all	BP	GO:0043588	skin development	25/328	64/1794	5.76e-05	0.00316925	0.00278898	12842/12843/12825/16011/55948/109620/12740/16480/54139/16952/74754/192897/14027/19041/16666/16667/16687/16688/67855/12832/22418/12831/66042/19225/12845	25	25	Suppressed	-0.286248	-1.22178	0.21522	0.619945	0.556953	99	tags=52%, list=29%, signal=40%	Dhcr24/Krt16/Irf6/Ppl/Asprv1/Evpl/Anxa1/Jup/Krt6b/Cldn4/Krt6a/Dsp/Sfn
TM_all_BP_GO:0045103	TM_all	BP	GO:0045103	intermediate filament-based process	10/328	17/1794	0.000211236	0.00731547	0.00643769	109620/18772/16664/22352/14027/19041/16666/16667/16687/16688	10	10	Suppressed	-0.610236	-1.91662	0.00733291	0.14062	0.126332	91	tags=80%, list=27%, signal=60%	Krt16/Pkp1/Ppl/Evpl/Krt6b/Krt6a/Krt14/Dsp
TM_all_BP_GO:0045104	TM_all	BP	GO:0045104	intermediate filament cytoskeleton organization	10/328	17/1794	0.000211236	0.00731547	0.00643769	109620/18772/16664/22352/14027/19041/16666/16667/16687/16688	10	10	Suppressed	-0.610236	-1.91662	0.00733291	0.14062	0.126332	91	tags=80%, list=27%, signal=60%	Krt16/Pkp1/Ppl/Evpl/Krt6b/Krt6a/Krt14/Dsp
TM_all_CC_GO:0031012	TM_all	CC	GO:0031012	extracellular matrix	86/331	193/1810	1.83e-19	2.26e-17	2.03e-17	12842/12843/20692/13010/12825/14873/17313/20317/17022/14219/13179/18295/16854/20720/21859/20194/12111/11816/545370/21858/71660/29817/64075/12258/16852/12821/16949/320712/13717/14264/67896/17926/329941/12406/12816/78892/16952/16012/20195/21825/192897/50706/13014/76293/64817/116847/216616/140792/12306/14114/68792/12837/353156/21826/107581/18073/23876/140474/269959/21809/19242/12832/12833/11600/1600…	86	86	Active	0.532298	3.01635	0.000178859	0.00663488	0.0057681	154	tags=81%, list=45%, signal=60%	Mgp/Serpine2/Dcn/Serpinf1/Col1a2/Bgn/Ccn2/Col1a1/Lum/Serping1/Igfbp7/Lgals1/Myoc/Ogn/Abi3bp/Sparc/Timp2/Fmod/Thbs1/Hmcn1/Col12a1/Igfbp6/Ccdc80/Eln/Timp3/Col3a1/Rarres2/Loxl1/Mfap4/Smoc1/Col8a2/Crispld2/Prelp/Serpinh1/Colec12/Fbln5/Col8a1/Col16a1/Fbln1/Col6a1/Postn/Thbs2/Cst3/Apoe/Nid1/Tgfb3/Gpc3/Srpx2/Angpt1/Igf2/Chad/Col11a1/Fn1/Ecm1/Mfap5/Fbn1/Fgl2/Itih5/Wnt5a/Ptn/Htra1/Mmp2/Col5a2/Col6a3/Omd/S…
TM_all_CC_GO:0062023	TM_all	CC	GO:0062023	collagen-containing extracellular matrix	78/331	164/1810	1e-19	2.26e-17	2.03e-17	12842/12843/20692/13010/12825/14873/17313/20317/17022/13179/18295/16854/20720/21859/20194/12111/545370/21858/71660/29817/64075/12258/16852/12821/16949/320712/13717/14264/67896/17926/329941/12406/12816/16952/16012/20195/21825/192897/50706/13014/76293/116847/216616/140792/12306/14114/68792/12837/353156/21826/107581/18073/23876/140474/21809/19242/12832/12833/11600/16002/56213/12831/14268/13601/27047…	78	78	Active	0.513099	2.85286	0.000180603	0.00663488	0.0057681	101	tags=58%, list=30%, signal=53%	Mgp/Serpine2/Dcn/Serpinf1/Col1a2/Bgn/Col1a1/Lum/Serping1/Igfbp7/Lgals1/Myoc/Ogn/Abi3bp/Sparc/Timp2/Fmod/Thbs1/Hmcn1/Col12a1/Igfbp6/Ccdc80/Eln/Timp3/Col3a1/Rarres2/Loxl1/Mfap4/Smoc1/Col8a2/Prelp/Serpinh1/Colec12/Fbln5/Col8a1/Col16a1/Fbln1/Col6a1/Postn/Thbs2/Cst3/Nid1/Tgfb3/Gpc3/Srpx2
TM_all_CC_GO:0030312	TM_all	CC	GO:0030312	external encapsulating structure	86/331	194/1810	2.8e-19	2.31e-17	2.06e-17	12842/12843/20692/13010/12825/14873/17313/20317/17022/14219/13179/18295/16854/20720/21859/20194/12111/11816/545370/21858/71660/29817/64075/12258/16852/12821/16949/320712/13717/14264/67896/17926/329941/12406/12816/78892/16952/16012/20195/21825/192897/50706/13014/76293/64817/116847/216616/140792/12306/14114/68792/12837/353156/21826/107581/18073/23876/140474/269959/21809/19242/12832/12833/11600/1600…	86	86	Active	0.532298	3.01635	0.000178859	0.00663488	0.0057681	154	tags=81%, list=45%, signal=60%	Mgp/Serpine2/Dcn/Serpinf1/Col1a2/Bgn/Ccn2/Col1a1/Lum/Serping1/Igfbp7/Lgals1/Myoc/Ogn/Abi3bp/Sparc/Timp2/Fmod/Thbs1/Hmcn1/Col12a1/Igfbp6/Ccdc80/Eln/Timp3/Col3a1/Rarres2/Loxl1/Mfap4/Smoc1/Col8a2/Crispld2/Prelp/Serpinh1/Colec12/Fbln5/Col8a1/Col16a1/Fbln1/Col6a1/Postn/Thbs2/Cst3/Apoe/Nid1/Tgfb3/Gpc3/Srpx2/Angpt1/Igf2/Chad/Col11a1/Fn1/Ecm1/Mfap5/Fbn1/Fgl2/Itih5/Wnt5a/Ptn/Htra1/Mmp2/Col5a2/Col6a3/Omd/S…
TM_all_CC_GO:0005615	TM_all	CC	GO:0005615	extracellular space	129/331	418/1810	3.34e-13	2.06e-11	1.85e-11	12842/12843/20692/13010/12825/11815/17313/16011/20317/17022/14219/13179/18295/66166/16854/20720/11812/21859/20194/12111/16010/11816/18542/21858/71660/29817/70045/64075/12258/16852/12821/56753/22240/16949/67860/12512/11568/13214/53869/14264/17926/329941/12332/57277/78896/12406/16835/12816/67701/56811/78892/16952/20315/227753/16858/56264/16592/15894/16012/13038/20195/19223/21825/50706/13014/76293/1…	129	129	Active	0.469336	2.82766	0.000177462	0.00663488	0.0057681	143	tags=67%, list=42%, signal=62%	Mgp/Serpine2/Dcn/Serpinf1/Igfbp5/Col1a2/Bgn/Ccn2/Col1a1/Apod/Lum/Serping1/Igfbp7/Ecrg4/Lgals1/Pcolce/Igfbp4/Myoc/Ogn/Sparc/Timp2/Fmod/Cxcl12/Thbs1/Cpxm1/Aebp1/Col12a1/Igfbp6/Timp3/Col3a1/Dpysl3/Rarres2/Igfbp2/Chil1/Loxl1/Mfap4/Smoc1/Col8a2/Spp1/Crispld2/Prelp/Ctsk/Ptgis/Serpinh1/Cd63/Dkk2/Islr/Icam1/Fbln5/Col8a1/Scube1/Col16a1/Fbln1/Col6a1/Postn/Cst3/Apoe/Fstl1/Edn3/Tgfb3/Sfrp2/Srpx2/Angpt1/Gsn/C…
TM_all_CC_GO:0005604	TM_all	CC	GO:0005604	basement membrane	24/331	51/1810	1.69e-06	7.22e-05	6.46e-05	20692/13010/14873/20317/21859/545370/21858/64075/12821/16949/67896/329941/192897/216616/12306/14114/12837/21826/18073/19242/12831/14268/14118/12826	24	24	Active	0.443515	1.83551	0.00925412	0.135403	0.117714	93	tags=58%, list=27%, signal=46%	Serpinf1/Sparc/Timp2/Hmcn1/Ccdc80/Timp3/Loxl1/Smoc1/Col8a2/Col8a1/Fbln1/Thbs2/Cst3/Nid1
TM_all_CC_GO:0099081	TM_all	CC	GO:0099081	supramolecular polymer	47/331	142/1810	7.07e-06	0.00024952	0.000223308	12842/12843/13010/12825/17022/13179/22003/11816/268482/22240/109620/110308/16665/11475/98932/16480/13717/53869/16664/22352/16952/14027/76293/76709/16682/19041/14114/60595/14609/16666/71960/16667/107581/23876/16663/69693/227613/16687/12832/13008/12831/14118/50530/17390/268977/12826/12814	47	47	Active	0.218507	1.08938	0.345247	0.758189	0.65914	50	tags=23%, list=15%, signal=23%	Dcn/Col1a2/Col1a1/Lum/Acta2/Myl9/Eln/Tpm1/Col3a1/Dpysl3/Mfap4
TM_all_CC_GO:0099512	TM_all	CC	GO:0099512	supramolecular fiber	46/331	139/1810	9.02e-06	0.000278565	0.000249302	12842/12843/13010/12825/17022/13179/22003/11816/268482/22240/109620/110308/16665/11475/98932/16480/13717/53869/16664/22352/16952/14027/76293/76709/16682/19041/14114/60595/14609/16666/71960/16667/107581/23876/16663/69693/227613/16687/12832/13008/12831/14118/50530/17390/268977/12814	46	46	Active	0.222241	1.09982	0.332605	0.758189	0.65914	50	tags=24%, list=15%, signal=24%	Dcn/Col1a2/Col1a1/Lum/Acta2/Myl9/Eln/Tpm1/Col3a1/Dpysl3/Mfap4
TM_all_CC_GO:0098644	TM_all	CC	GO:0098644	complex of collagen trimers	9/331	12/1810	2.72e-05	0.000746482	0.000668064	12842/12843/12825/17022/107581/12832/12831/12826/12814	9	9	Active	0.579091	1.71356	0.0231113	0.178515	0.155194	41	tags=44%, list=12%, signal=40%	Col1a2/Col1a1/Lum/Col3a1
TM_all_CC_GO:0005581	TM_all	CC	GO:0005581	collagen trimer	18/331	43/1810	0.000236888	0.00475963	0.00425963	12842/12843/12825/17022/13179/12821/329941/12816/140792/12837/107581/12832/12833/12831/12835/12834/12826/12814	18	18	Active	0.545376	2.04708	0.00190694	0.0474616	0.0412613	83	tags=61%, list=24%, signal=49%	Dcn/Col1a2/Col1a1/Lum/Col12a1/Col3a1/Col8a2/Colec12/Col8a1/Col16a1/Col6a1
TM_all_CC_GO:0099080	TM_all	CC	GO:0099080	supramolecular complex	47/331	166/1810	0.000580321	0.0089587	0.00801759	12842/12843/13010/12825/17022/13179/22003/11816/268482/22240/109620/110308/16665/11475/98932/16480/13717/53869/16664/22352/16952/14027/76293/76709/16682/19041/14114/60595/14609/16666/71960/16667/107581/23876/16663/69693/227613/16687/12832/13008/12831/14118/50530/17390/268977/12826/12814	47	47	Active	0.218507	1.08938	0.345247	0.758189	0.65914	50	tags=23%, list=15%, signal=23%	Dcn/Col1a2/Col1a1/Lum/Acta2/Myl9/Eln/Tpm1/Col3a1/Dpysl3/Mfap4
TM_all_CC_GO:0030057	TM_all	CC	GO:0030057	desmosome	9/331	10/1810	1.75e-06	7.22e-05	6.46e-05	109620/13507/16480/13512/18772/13506/13510/56460/69693	9	9	Suppressed	-0.633634	-1.90781	0.00679712	0.11712	0.101819	132	tags=100%, list=39%, signal=63%	Pof1b/Dsg1a/Pkp1/Dsg3/Dsc2/Jup/Dsc3/Dsp
TM_all_CC_GO:0005882	TM_all	CC	GO:0005882	intermediate filament	15/331	30/1810	6.86e-05	0.00169466	0.00151664	268482/109620/110308/16665/16480/16664/22352/14027/16682/19041/14609/16666/16667/16663/16687	15	15	Suppressed	-0.631769	-2.30013	0.00020734	0.00663488	0.0057681	71	tags=80%, list=21%, signal=66%	Krt4/Krt16/Ppl/Evpl/Krt13/Jup/Krt6a/Krt14/Dsp/Krt15/Krt12/Krt5
TM_all_CC_GO:0016328	TM_all	CC	GO:0016328	lateral plasma membrane	11/331	19/1810	0.000121939	0.00273809	0.00245046	53624/56753/17075/12740/16480/16952/20496/13510/12741/14609/26365	11	11	Suppressed	-0.541363	-1.75716	0.019103	0.158484	0.13778	62	tags=55%, list=18%, signal=46%	Epcam/Anxa1/Jup/Tacstd2/Cldn4/Cldn7
TM_all_CC_GO:0005777	TM_all	CC	GO:0005777	peroxisome	8/331	12/1810	0.000289046	0.00475963	0.00425963	110196/21881/76974/22352/14081/54683/319554/15357	8	8	Suppressed	-0.395046	-1.13657	0.299898	0.758189	0.65914	55	tags=88%, list=16%, signal=75%	Idi1/Acsl1/Hmgcr/Prdx5/Fdps/Urah/Tkt
TM_all_CC_GO:0042579	TM_all	CC	GO:0042579	microbody	8/331	12/1810	0.000289046	0.00475963	0.00425963	110196/21881/76974/22352/14081/54683/319554/15357	8	8	Suppressed	-0.395046	-1.13657	0.299898	0.758189	0.65914	55	tags=88%, list=16%, signal=75%	Idi1/Acsl1/Hmgcr/Prdx5/Fdps/Urah/Tkt
TM_all_CC_GO:0045111	TM_all	CC	GO:0045111	intermediate filament cytoskeleton	15/331	33/1810	0.000268074	0.00475963	0.00425963	268482/109620/110308/16665/16480/16664/22352/14027/16682/19041/14609/16666/16667/16663/16687	15	15	Suppressed	-0.631769	-2.30013	0.00020734	0.00663488	0.0057681	71	tags=80%, list=21%, signal=66%	Krt4/Krt16/Ppl/Evpl/Krt13/Jup/Krt6a/Krt14/Dsp/Krt15/Krt12/Krt5
TM_all_MF_GO:0005198	TM_all	MF	GO:0005198	structural molecule activity	63/321	133/1760	7.34e-16	2.09e-13	1.91e-13	12842/12843/20692/12825/17022/13179/18295/53624/12111/22003/545370/29817/268482/12821/109620/320712/16665/17153/12740/16480/13717/329941/16664/22352/12816/16012/21825/50706/14027/76293/116847/216616/76709/105853/19041/12741/14114/68792/16666/12837/16667/107581/18073/23876/16663/227613/140474/228576/12832/12833/13008/12831/14268/13601/66695/12835/14118/12845/50530/12834/268977/12826/12814	63	63	Active	0.307981	1.64288	0.0134277	0.185302	0.173147	86	tags=41%, list=25%, signal=38%	Dcn/Col1a2/Bgn/Col1a1/Lum/Igfbp7/Ogn/Abi3bp/Sparc/Thbs1/Hmcn1/Col12a1/Igfbp6/Eln/Tpm1/Col3a1/Mfap4/Col8a2/Prelp/Vim/Fbln5/Col8a1/Col16a1/Fbln1/Col6a1/Postn
TM_all_MF_GO:0005201	TM_all	MF	GO:0005201	extracellular matrix structural constituent	42/321	75/1760	5.89e-14	8.4e-12	7.66e-12	12842/12843/20692/12825/17022/13179/18295/12111/545370/29817/12821/320712/13717/329941/12816/16012/21825/50706/76293/116847/216616/14114/68792/12837/107581/18073/23876/140474/12832/12833/12831/14268/13601/66695/12835/14118/12845/50530/12834/268977/12826/12814	42	42	Active	0.533362	2.57263	0.000184536	0.0186878	0.0174619	86	tags=57%, list=25%, signal=49%	Dcn/Col1a2/Bgn/Col1a1/Lum/Igfbp7/Ogn/Abi3bp/Sparc/Thbs1/Hmcn1/Col12a1/Igfbp6/Eln/Col3a1/Mfap4/Col8a2/Prelp/Fbln5/Col8a1/Col16a1/Fbln1/Col6a1/Postn
TM_all_MF_GO:0019838	TM_all	MF	GO:0019838	growth factor binding	22/321	44/1760	1.21e-06	0.000114757	0.000104691	12842/12843/12825/16011/14219/14181/16010/29817/16012/21825/192897/16008/68792/18595/21809/19242/12833/56213/12831/16007/268977/12826	22	22	Active	0.561323	2.24674	0.000746826	0.023788	0.0222275	44	tags=45%, list=13%, signal=42%	Igfbp5/Col1a2/Ccn2/Col1a1/Igfbp7/Igfbp4/Thbs1/Igfbp6/Col3a1/Igfbp2
TM_all_MF_GO:0005518	TM_all	MF	GO:0005518	collagen binding	15/321	29/1760	3.95e-05	0.00229321	0.00209205	20692/17022/13179/18542/320712/11568/12406/13038/21825/18073/12833/66695/12845/19073/12834	15	15	Active	0.632639	2.24735	0.000378	0.0210929	0.0197092	93	tags=73%, list=27%, signal=56%	Dcn/Lum/Pcolce/Abi3bp/Sparc/Thbs1/Aebp1/Ctsk/Serpinh1/Col6a1/Nid1
TM_all_MF_GO:0050840	TM_all	MF	GO:0050840	extracellular matrix binding	14/321	26/1760	4.02e-05	0.00229321	0.00209205	20692/13179/16854/12111/64075/16852/13717/21825/12306/72434/18073/20750/13601/16007	14	14	Active	0.572703	1.98416	0.00324118	0.0526215	0.0491696	56	tags=57%, list=16%, signal=50%	Dcn/Bgn/Lgals1/Sparc/Thbs1/Eln/Smoc1/Spp1
TM_all_MF_GO:0044877	TM_all	MF	GO:0044877	protein-containing complex binding	63/321	223/1760	5.4e-05	0.00256568	0.00234062	21345/20692/12825/17022/14219/13179/16854/22003/11816/18542/21858/67916/17992/320712/17075/12512/11568/16480/12332/16664/12406/16835/22352/20315/227753/15894/13038/12443/21825/192897/14027/18712/223272/76709/140792/26557/14114/60595/71960/11555/107581/18073/12759/18595/23876/20750/69693/140474/12575/21809/19242/12833/16002/12268/14268/66695/16007/14118/12845/19073/19662/12834/18654	63	63	Active	0.369669	1.97194	0.000907276	0.023788	0.0222275	113	tags=52%, list=33%, signal=43%	Dcn/Tagln/Ccn2/Lum/Plpp3/Pcolce/Abi3bp/Sparc/Timp2/Cxcl12/Thbs1/Aebp1/Tpm1/Col3a1/Spp1/Itgbl1/Ctsk/Serpinh1/Cd63/Colec12/Vim/Icam1/Fbln5/Col16a1/Fbln1/Col6a1/Apoe/Nid1/Tgfb3/Pdgfra/Gsn/Clu/Igf2
TM_all_MF_GO:0002020	TM_all	MF	GO:0002020	protease binding	14/321	29/1760	0.000189407	0.00449842	0.00410382	12842/12843/13010/12825/21859/21858/16835/66824/13014/12306/209294/14268/13601/12845	14	14	Active	0.447983	1.55206	0.0522402	0.450572	0.421015	41	tags=36%, list=12%, signal=33%	Col1a2/Col1a1/Timp2/Timp3/Col3a1
TM_all_MF_GO:0005178	TM_all	MF	GO:0005178	integrin binding	19/321	46/1760	0.000187767	0.00449842	0.00410382	12825/14219/21858/67916/20315/15894/21825/192897/223272/14114/107581/23876/20750/19242/16002/14268/16007/14118/12845	19	19	Active	0.574604	2.19844	0.000758869	0.023788	0.0222275	80	tags=63%, list=23%, signal=51%	Ccn2/Plpp3/Timp2/Cxcl12/Thbs1/Col3a1/Spp1/Itgbl1/Icam1/Fbln5/Col16a1/Fbln1
TM_all_MF_GO:0005520	TM_all	MF	GO:0005520	insulin-like growth factor binding	9/321	14/1760	0.000170542	0.00449842	0.00410382	16011/14219/16010/29817/16012/192897/16008/56213/16007	9	9	Active	0.748764	2.23169	0.000382117	0.0210929	0.0197092	44	tags=67%, list=13%, signal=60%	Igfbp5/Ccn2/Igfbp7/Igfbp4/Igfbp6/Igfbp2
TM_all_MF_GO:0005539	TM_all	MF	GO:0005539	glycosaminoglycan binding	27/321	76/1760	0.000188364	0.00449842	0.00410382	14219/13179/20720/12111/11816/18542/64075/17242/22240/320712/67896/78892/21825/50706/15200/116847/21826/14314/21946/19242/12831/14268/16007/14118/12845/12628/12814	27	27	Active	0.543153	2.32579	0.000184468	0.0186878	0.0174619	94	tags=63%, list=27%, signal=50%	Serpine2/Dcn/Bgn/Ccn2/Mdk/Pcolce/Abi3bp/Thbs1/Ccdc80/Dpysl3/Smoc1/Crispld2/Prelp/Postn/Thbs2/Apoe/Fstl1
TM_all_MF_GO:0050839	TM_all	MF	GO:0050839	cell adhesion molecule binding	27/321	75/1760	0.000145451	0.00449842	0.00410382	12825/14219/53624/21858/67916/109620/17075/16480/18772/20315/15894/21825/192897/50706/223272/56460/14114/107581/23876/20750/19242/16002/13723/14268/16007/14118/12845	27	27	Active	0.361236	1.54682	0.0464859	0.413874	0.386725	91	tags=52%, list=27%, signal=41%	Ccn2/Plpp3/Timp2/Cxcl12/Thbs1/Col3a1/Spp1/Itgbl1/Icam1/Fbln5/Col16a1/Fbln1/Postn/Emb
TM_all_MF_GO:1901681	TM_all	MF	GO:1901681	sulfur compound binding	27/321	75/1760	0.000145451	0.00449842	0.00410382	14219/20720/11816/18542/21881/64075/17242/22240/320712/67896/78892/21825/14858/21366/50706/15200/116847/21826/14314/19242/12831/14268/16007/14118/12845/12628/12814	27	27	Active	0.462139	1.97888	0.00202915	0.0373363	0.0348871	98	tags=59%, list=29%, signal=46%	Serpine2/Ccn2/Mdk/Pcolce/Abi3bp/Thbs1/Ccdc80/Dpysl3/Smoc1/Crispld2/Prelp/Postn/Thbs2/Apoe/Fstl1/Slc6a6
TM_all_MF_GO:0030020	TM_all	MF	GO:0030020	extracellular matrix structural constituent conferring tensile strength	13/321	26/1760	0.000207393	0.00454669	0.00414786	12842/12843/12825/12816/12837/107581/12832/12833/12831/12835/12834/12826/12814	13	13	Active	0.541033	1.82673	0.00865884	0.132769	0.124059	164	tags=100%, list=48%, signal=54%	Col1a2/Col1a1/Col12a1/Col3a1/Col8a1/Col16a1/Col6a1/Col11a1/Col5a2/Col6a3/Col6a2/Col5a1/Col4a1
TM_all_MF_GO:0008201	TM_all	MF	GO:0008201	heparin binding	23/321	62/1760	0.000275975	0.00561806	0.00512525	14219/20720/11816/18542/64075/17242/320712/67896/78892/21825/50706/15200/116847/21826/14314/19242/12831/14268/16007/14118/12845/12628/12814	23	23	Active	0.52396	2.12546	0.00112045	0.023788	0.0222275	161	tags=96%, list=47%, signal=54%	Serpine2/Ccn2/Mdk/Pcolce/Abi3bp/Thbs1/Ccdc80/Smoc1/Crispld2/Prelp/Postn/Thbs2/Apoe/Fstl1/Col11a1/Fn1/Fbn1/Ptn/Ccn1/Col5a1/Cfh/Comp
TM_all_MF_GO:0061134	TM_all	MF	GO:0061134	peptidase regulator activity	23/321	63/1760	0.000363028	0.00689754	0.00629249	13010/20861/100034684/20317/20720/21859/18542/21858/12258/12406/66824/67701/54683/13014/12306/14114/53614/20319/408198/209294/14268/14734/209378	23	23	Active	0.348481	1.41363	0.097479	0.517388	0.483448	102	tags=52%, list=30%, signal=39%	Serpine2/Serpinf1/Serping1/Pcolce/Timp2/Timp3/Serpinh1/Fbln1/Cst3/Sfrp2/Gpc3/Reck
TM_all_MF_GO:0001968	TM_all	MF	GO:0001968	fibronectin binding	10/321	18/1760	0.000390103	0.00694871	0.00633917	16011/14219/67896/17926/16012/13038/21825/14114/12845/17390	10	10	Active	0.699584	2.16964	0.00076176	0.023788	0.0222275	80	tags=80%, list=23%, signal=63%	Igfbp5/Ccn2/Myoc/Thbs1/Igfbp6/Ccdc80/Ctsk/Fbln1
TM_pom_BP_GO:0001503	TM_pom	BP	GO:0001503	ossification	62/490	362/15707	1.21e-28	5.4e-25	3.56e-25	16000/19242/64075/14219/14734/17313/17242/16011/12705/13601/110075/17926/14683/15902/12394/20319/11647/68713/14119/14184/14362/16002/14560/211401/12845/20750/16007/14758/21922/16478/329628/14609/16974/67972/22418/12159/12608/22417/68010/16998/27047/218952/208727/107250/20666/16948/22411/20682/17260/20256/76566/21416/14042/22341/21833/20377/12043/20148/100038882/12843/12842/15903	62	62	Active	0.269363	1.23215	0.176588	0.661916	0.635917	124	tags=40%, list=24%, signal=35%	Myoc/Gpc3/Sfrp2/Ccn2/Smoc1/Igfbp5/Mdk/Comp/Ccn1/Mgp/Id2/Fzd1/Alpl/Igf2/Fgfr3/Runx1/Fbn2/Omd/Ifitm1/Ltbp3/Clec11a/Lrp6/Gdf10/Fat4/Gnas
TM_pom_BP_GO:0030198	TM_pom	BP	GO:0030198	extracellular matrix organization	53/490	280/15707	9.69e-27	1.3e-23	8.54e-24	271127/64075/14219/80883/67896/16777/13717/56429/15116/16949/18595/12837/53381/20319/12814/269959/329941/12822/68169/108075/21808/12845/16007/14114/14238/14758/23876/654812/16998/11568/12832/224697/78892/53614/320712/107250/16779/237759/373864/50706/16948/20682/17022/12819/14042/107581/240725/14115/12831/18073/12843/240913/12842	53	53	Active	0.218132	0.966236	0.513807	0.814735	0.782733	71	tags=23%, list=14%, signal=22%	Sfrp2/Ccn2/Smoc1/Ccdc80/Eln/Loxl1/Comp/Ccn1/Col8a1/Prdx4/Fbln1/Col11a1
TM_pom_BP_GO:0043062	TM_pom	BP	GO:0043062	extracellular structure organization	53/490	281/15707	1.16e-26	1.3e-23	8.54e-24	271127/64075/14219/80883/67896/16777/13717/56429/15116/16949/18595/12837/53381/20319/12814/269959/329941/12822/68169/108075/21808/12845/16007/14114/14238/14758/23876/654812/16998/11568/12832/224697/78892/53614/320712/107250/16779/237759/373864/50706/16948/20682/17022/12819/14042/107581/240725/14115/12831/18073/12843/240913/12842	53	53	Active	0.218132	0.966236	0.513807	0.814735	0.782733	71	tags=23%, list=14%, signal=22%	Sfrp2/Ccn2/Smoc1/Ccdc80/Eln/Loxl1/Comp/Ccn1/Col8a1/Prdx4/Fbln1/Col11a1
TM_pom_BP_GO:0045229	TM_pom	BP	GO:0045229	external encapsulating structure organization	53/490	281/15707	1.16e-26	1.3e-23	8.54e-24	271127/64075/14219/80883/67896/16777/13717/56429/15116/16949/18595/12837/53381/20319/12814/269959/329941/12822/68169/108075/21808/12845/16007/14114/14238/14758/23876/654812/16998/11568/12832/224697/78892/53614/320712/107250/16779/237759/373864/50706/16948/20682/17022/12819/14042/107581/240725/14115/12831/18073/12843/240913/12842	53	53	Active	0.218132	0.966236	0.513807	0.814735	0.782733	71	tags=23%, list=14%, signal=22%	Sfrp2/Ccn2/Smoc1/Ccdc80/Eln/Loxl1/Comp/Ccn1/Col8a1/Prdx4/Fbln1/Col11a1
TM_pom_BP_GO:0001501	TM_pom	BP	GO:0001501	skeletal system development	55/490	456/15707	4.39e-18	2.8e-15	1.85e-15	16000/14219/17313/17242/21825/13601/18595/21809/110075/12111/12643/17926/14683/12394/20319/12814/11647/14119/14184/21808/12845/16007/21922/329628/14609/16974/14451/22418/12159/16998/12832/208727/20666/373864/21386/16948/18741/20682/18133/17260/76566/17701/14042/218772/21833/240725/208647/20377/20677/20148/99929/13038/12843/12842/19662	55	55	Active	0.309156	1.38263	0.0804656	0.624461	0.599933	124	tags=40%, list=24%, signal=34%	Myoc/Sfrp2/Ccn2/Chad/Thbs1/Mdk/Comp/Ccn1/Tgfb3/Mgp/Bgn/Rbp4/Col11a1/Alpl/Fgfr3/Runx1/Gas1/Fbn2/Ltbp3/Lrp6/Fat4/Gnas
TM_pom_BP_GO:0009611	TM_pom	BP	GO:0009611	response to wounding	52/490	429/15707	3.1e-17	1.71e-14	1.13e-14	20720/16000/19242/78896/17242/20496/21825/67916/11475/18595/66961/14683/107589/14456/14184/68169/21808/268373/12845/16007/14114/13649/14609/12193/22418/77579/22417/12490/11465/218952/106014/19091/21824/21857/16779/14062/16600/16948/16001/18007/13518/107351/18213/14042/11816/12192/17886/11826/12043/12831/18783/12842	52	52	Active	0.229639	1.0132	0.446329	0.781345	0.750655	54	tags=17%, list=11%, signal=17%	Ecrg4/Serpine2/Thbs1/Slc12a2/Mdk/Comp/Plpp3/Ccn1/Gas6
TM_pom_BP_GO:0061448	TM_pom	BP	GO:0061448	connective tissue development	39/490	245/15707	3.45e-17	1.71e-14	1.13e-14	16000/14219/17313/17242/21825/13601/110075/12111/14683/15902/12394/20319/12814/22187/14184/21808/13653/12845/16007/16974/22418/12159/16998/20660/373864/16948/20682/18133/17260/76566/17701/14042/218772/21833/240725/208647/12831/13038/12842	39	39	Active	0.291413	1.21018	0.221745	0.683678	0.656824	91	tags=31%, list=18%, signal=27%	Sfrp2/Ccn2/Thbs1/Mdk/Comp/Ccn1/Mgp/Id2/Bgn/Col11a1/Fgfr3/Runx1
TM_pom_BP_GO:0007178	TM_pom	BP	GO:0007178	transmembrane receptor protein serine/threonine kinase signaling pathway	43/490	319/15707	4.25e-16	1.9e-13	1.25e-13	12741/14734/65112/21825/12705/21809/110075/20319/14119/14362/14560/108075/21808/13653/12845/17965/16007/17263/66042/22418/12159/68010/16998/218952/20660/20666/15446/16948/18569/18133/15205/18007/20742/21416/17701/22352/14042/240725/50791/24063/20377/12843/20482	43	43	Active	0.266093	1.12667	0.303259	0.712145	0.684173	127	tags=35%, list=25%, signal=29%	Gpc3/Sfrp2/Thbs1/Pmepa1/Comp/Ccn1/Tgfb3/Sostdc1/Fzd1/Fbn2/Ltbp4/Ltbp3/Hpgd/Gdf10/Meg3
TM_pom_BP_GO:0051216	TM_pom	BP	GO:0051216	cartilage development	32/490	177/15707	6.02e-16	2.28e-13	1.5e-13	14219/17313/17242/21825/13601/110075/12111/14683/12394/20319/12814/14184/21808/12845/16007/16974/22418/12159/16998/373864/20682/18133/17260/76566/17701/14042/218772/21833/240725/208647/13038/12842	32	32	Active	0.388982	1.53478	0.0439407	0.560503	0.538487	124	tags=44%, list=24%, signal=35%	Sfrp2/Ccn2/Thbs1/Mdk/Comp/Ccn1/Mgp/Bgn/Col11a1/Fgfr3/Runx1/Ltbp3/Lrp6/Gnas
TM_pom_BP_GO:0031589	TM_pom	BP	GO:0031589	cell-substrate adhesion	43/490	337/15707	3.18e-15	1.01e-12	6.68e-13	18606/19242/64075/14219/80883/67896/17242/16777/21825/11600/12837/17926/14456/21844/68169/226255/20750/16852/16007/14114/14758/22417/12490/11465/218952/30963/12512/320712/16779/223272/18708/50706/107351/11856/24066/22341/107581/14115/50768/20377/12043/18073/12842	43	43	Active	0.268209	1.13563	0.291938	0.7059	0.678173	54	tags=23%, list=11%, signal=23%	Myoc/Ccn2/Thbs1/Smoc1/Ccdc80/Angpt1/Mdk/Ccn1/Col8a1/Gas6
TM_pom_BP_GO:0001649	TM_pom	BP	GO:0001649	osteoblast differentiation	32/490	191/15707	5.8e-15	1.73e-12	1.14e-12	16000/64075/16011/12705/110075/17926/14683/15902/20319/14119/14362/16002/14560/20750/16007/16478/14609/12159/12608/22417/68010/218952/208727/20666/16948/22411/20682/17260/22341/20377/12842/15903	32	32	Active	0.237247	0.936092	0.545772	0.828638	0.79609	87	tags=25%, list=17%, signal=22%	Myoc/Sfrp2/Smoc1/Igfbp5/Ccn1/Id2/Fzd1/Igf2
TM_pom_BP_GO:0003007	TM_pom	BP	GO:0003007	heart morphogenesis	36/490	247/15707	1.01e-14	2.81e-12	1.85e-12	21825/11600/12876/15902/20319/12814/14362/21808/16007/20348/329628/14609/16974/22418/12159/21385/17999/18187/20666/21386/22411/18741/20682/18569/15205/17260/20564/77446/17701/14042/218772/50768/20677/12831/20148/19662	36	36	Active	0.302377	1.23135	0.20711	0.676243	0.649681	80	tags=25%, list=16%, signal=23%	Sfrp2/Thbs1/Angpt1/Ccn1/Id2/Cpe/Rbp4/Col11a1/Fzd1
TM_pom_BP_GO:0050673	TM_pom	BP	GO:0050673	epithelial cell proliferation	46/490	410/15707	4.28e-14	1e-11	6.62e-12	16000/19242/56312/14734/20317/17242/16011/21825/13601/12837/15902/20319/64103/329941/14184/16002/211401/20315/15234/21808/16010/13642/18654/13649/14609/16974/14451/22418/12159/12608/12490/20666/20682/14645/18133/15205/11835/17260/12444/21416/11816/22341/240725/12192/20377/15370	46	46	Active	0.275043	1.18371	0.241268	0.695224	0.667917	64	tags=26%, list=12%, signal=25%	Tnmd/Gpc3/Sfrp2/Thbs1/Igfbp5/Serpinf1/Mdk/Cxcl12/Pgf/Col8a1/Id2/Igfbp4
TM_pom_BP_GO:1901342	TM_pom	BP	GO:1901342	regulation of vasculature development	37/490	276/15707	6.23e-14	1.26e-11	8.33e-12	18606/19242/12741/20317/17242/20496/13179/21825/12654/19223/13601/21413/70097/12394/20319/64103/16002/15234/21808/18654/13197/22418/23876/22417/16598/654812/12490/21872/15945/106014/53614/16600/14645/11852/22341/240725/11826	37	37	Active	0.316599	1.29745	0.154742	0.659727	0.633814	51	tags=27%, list=10%, signal=26%	Chil1/Tnmd/Sfrp2/Thbs1/Cxcl10/Slc12a2/Serpinf1/Mdk/Ptgis/Pgf
TM_pom_BP_GO:0060562	TM_pom	BP	GO:0060562	epithelial tube morphogenesis	42/490	357/15707	1.15e-13	2.03e-11	1.34e-11	16000/271127/14734/17313/17242/20496/11600/22420/18595/20319/14362/211401/20315/21808/13642/18654/329628/14609/16974/66042/22418/12159/21385/22417/16911/24136/15945/20666/21386/18741/20682/15205/11835/17260/22323/11852/14042/24063/50768/20377/12043/20677	42	42	Active	0.278319	1.17477	0.248721	0.698266	0.670839	51	tags=21%, list=10%, signal=21%	Gpc3/Sfrp2/Cxcl10/Slc12a2/Angpt1/Mdk/Mgp/Cxcl12/Pgf
TM_pom_BP_GO:0042060	TM_pom	BP	GO:0042060	wound healing	39/490	314/15707	1.58e-13	2.51e-11	1.66e-11	20720/16000/20496/21825/67916/11475/18595/14683/107589/14456/68169/21808/268373/12845/16007/14114/13649/14609/22418/77579/22417/12490/11465/218952/106014/19091/21824/21857/14062/16948/13518/107351/14042/11816/17886/11826/12831/18783/12842	39	39	Active	0.21643	0.898788	0.604775	0.852402	0.818921	66	tags=21%, list=13%, signal=19%	Serpine2/Thbs1/Slc12a2/Comp/Plpp3/Ccn1/Gas6/Fbln1
TM_pom_BP_GO:0003206	TM_pom	BP	GO:0003206	cardiac chamber morphogenesis	25/490	131/15707	2.73e-13	3.93e-11	2.59e-11	12876/15902/20319/12814/14362/21808/16007/20348/16974/22418/12159/21385/18187/20666/21386/22411/18741/15205/17260/20564/77446/218772/20677/20148/19662	25	25	Active	0.318125	1.17651	0.264598	0.700001	0.672506	80	tags=28%, list=16%, signal=25%	Sfrp2/Ccn1/Id2/Cpe/Rbp4/Col11a1/Fzd1
TM_pom_BP_GO:0010810	TM_pom	BP	GO:0010810	regulation of cell-substrate adhesion	31/490	211/15707	6.09e-13	8.24e-11	5.43e-11	18606/19242/64075/67896/17242/21825/12837/17926/68169/20750/16852/16007/14114/14758/22417/11465/218952/30963/320712/18708/50706/107351/11856/24066/22341/107581/14115/50768/12043/18073/12842	31	31	Active	0.269369	1.05532	0.391659	0.752891	0.723318	66	tags=26%, list=13%, signal=24%	Myoc/Thbs1/Smoc1/Ccdc80/Mdk/Ccn1/Col8a1/Fbln1
TM_pom_BP_GO:0045765	TM_pom	BP	GO:0045765	regulation of angiogenesis	35/490	272/15707	1.03e-12	1.35e-10	8.91e-11	18606/19242/12741/20317/17242/20496/13179/21825/12654/19223/13601/21413/70097/12394/20319/64103/16002/15234/21808/18654/13197/22418/23876/16598/12490/21872/15945/106014/53614/16600/14645/11852/22341/240725/11826	35	35	Active	0.34326	1.38862	0.101036	0.645921	0.62055	51	tags=29%, list=10%, signal=28%	Chil1/Tnmd/Sfrp2/Thbs1/Cxcl10/Slc12a2/Serpinf1/Mdk/Ptgis/Pgf
TM_pom_BP_GO:0061138	TM_pom	BP	GO:0061138	morphogenesis of a branching epithelium	30/490	202/15707	1.09e-12	1.39e-10	9.16e-11	16000/271127/14734/17313/17242/20496/11600/22420/18595/72780/20319/20315/15234/18654/20348/329628/21817/16974/22418/12159/22417/21386/18741/20682/11835/14042/240725/24063/20377/12043	30	30	Active	0.315939	1.22709	0.215342	0.682215	0.655419	51	tags=27%, list=10%, signal=26%	Gpc3/Sfrp2/Slc12a2/Angpt1/Mdk/Mgp/Cxcl12/Pgf
TM_pom_BP_GO:0003151	TM_pom	BP	GO:0003151	outflow tract morphogenesis	19/490	77/15707	1.65e-12	1.99e-10	1.31e-10	21825/20319/14362/21808/20348/16974/22418/12159/21385/17999/18187/20666/21386/22411/18741/15205/17260/218772/20148	19	19	Active	0.270406	0.921448	0.569291	0.831376	0.798721	18	tags=11%, list=4%, signal=11%	Sfrp2/Thbs1
TM_pom_BP_GO:0060411	TM_pom	BP	GO:0060411	cardiac septum morphogenesis	19/490	77/15707	1.65e-12	1.99e-10	1.31e-10	15902/14362/21808/16007/20348/16974/22418/12159/21385/18187/20666/21386/22411/18741/15205/20564/218772/20677/20148	19	19	Active	0.160243	0.546053	0.950837	0.997559	0.958377	433	tags=100%, list=85%, signal=16%	Ccn1/Id2/Fzd1/Lrp6/Nrp2/Sox11/Pitx2/Slit3/Sox4/Hes1/Dhrs3/Rarb/Tbx3/Bmp4/Wnt11/Tbx2/Sema3c/Tgfb2/Wnt5a
TM_pom_BP_GO:0048705	TM_pom	BP	GO:0048705	skeletal system morphogenesis	30/490	207/15707	2.08e-12	2.44e-10	1.61e-10	14219/21825/18595/21809/12643/14683/20319/12814/11647/14119/14184/21808/12845/16974/14451/12159/16998/20666/373864/20682/17260/76566/17701/14042/218772/21833/20377/20148/99929/12842	30	30	Active	0.421287	1.63625	0.0236563	0.552413	0.530715	124	tags=47%, list=24%, signal=38%	Sfrp2/Ccn2/Chad/Thbs1/Comp/Tgfb3/Col11a1/Alpl/Fgfr3/Gas1/Fbn2/Ltbp3/Lrp6/Gnas
TM_pom_BP_GO:0001763	TM_pom	BP	GO:0001763	morphogenesis of a branching structure	31/490	221/15707	2.14e-12	2.45e-10	1.61e-10	16000/271127/14734/17313/17242/20496/11600/22420/12876/18595/72780/20319/20315/15234/18654/20348/329628/21817/16974/22418/12159/22417/21386/18741/20682/11835/14042/240725/24063/20377/12043	31	31	Active	0.321211	1.25842	0.18801	0.661916	0.635917	74	tags=32%, list=14%, signal=29%	Gpc3/Sfrp2/Slc12a2/Angpt1/Mdk/Mgp/Cxcl12/Pgf/Cpe/Rspo3
TM_pom_BP_GO:0003205	TM_pom	BP	GO:0003205	cardiac chamber development	27/490	172/15707	3.97e-12	4.32e-10	2.85e-10	12876/15902/20319/12814/14362/21808/16007/20348/16974/22418/77579/12159/21385/16911/18187/20666/21386/22411/18741/15205/17260/20564/77446/218772/20677/20148/19662	27	27	Active	0.32752	1.23373	0.201576	0.6735	0.647046	98	tags=33%, list=19%, signal=28%	Sfrp2/Ccn1/Id2/Cpe/Rbp4/Col11a1/Fzd1/Lmo4/Myh10
TM_pom_BP_GO:0090287	TM_pom	BP	GO:0090287	regulation of cellular response to growth factor stimulus	34/490	270/15707	4.07e-12	4.33e-10	2.85e-10	14734/65112/13179/21825/11600/21809/21413/20319/64103/14119/14362/17965/16007/14783/66042/22418/12159/22417/68010/17999/12512/20660/20666/16948/15205/18007/21416/17701/24066/22341/240725/24063/20377/20482	34	34	Active	0.395142	1.5846	0.0303609	0.552413	0.530715	46	tags=24%, list=9%, signal=23%	Tnmd/Gpc3/Sfrp2/Thbs1/Pmepa1/Angpt1/Ccn1/Tgfb3
TM_pom_BP_GO:0003279	TM_pom	BP	GO:0003279	cardiac septum development	22/490	114/15707	5.91e-12	6e-10	3.96e-10	15902/14362/21808/16007/20348/16974/22418/77579/12159/21385/16911/18187/20666/21386/22411/18741/15205/20564/77446/218772/20677/20148	22	22	Active	0.172924	0.613084	0.919501	0.989433	0.95057	118	tags=27%, list=23%, signal=22%	Ccn1/Id2/Fzd1/Lmo4/Myh10/Lrp6
TM_pom_BP_GO:0030509	TM_pom	BP	GO:0030509	BMP signaling pathway	24/490	138/15707	6.69e-12	6.64e-10	4.38e-10	14734/21809/20319/14362/21808/13653/12845/17965/16007/66042/22418/12159/68010/20660/20666/18569/15205/18007/21416/17701/14042/240725/20377/20482	24	24	Active	0.370473	1.35109	0.128038	0.659727	0.633814	80	tags=29%, list=16%, signal=26%	Gpc3/Sfrp2/Comp/Ccn1/Tgfb3/Sostdc1/Fzd1
TM_pom_BP_GO:0033002	TM_pom	BP	GO:0033002	muscle cell proliferation	30/490	225/15707	1.81e-11	1.69e-09	1.11e-09	16000/16011/21825/11600/21809/59027/15902/21808/13653/13649/14609/21817/12159/21385/106014/19091/208727/54598/18708/15446/16600/18569/18133/17260/16001/21416/17967/19084/12846/19662	30	30	Active	0.186689	0.725086	0.826579	0.953865	0.916399	70	tags=20%, list=14%, signal=18%	Thbs1/Angpt1/Igfbp5/Tgfb3/Id2/Rbp4
TM_pom_BP_GO:0045667	TM_pom	BP	GO:0045667	regulation of osteoblast differentiation	23/490	133/15707	2.09e-11	1.9e-09	1.25e-09	16000/64075/16011/12705/14683/15902/20319/14119/14560/16007/16478/12159/12608/22417/68010/218952/208727/20666/20682/17260/22341/20377/15903	23	23	Active	0.240343	0.866912	0.641988	0.868694	0.834572	59	tags=22%, list=12%, signal=20%	Sfrp2/Smoc1/Igfbp5/Ccn1/Id2
TM_pom_BP_GO:0048736	TM_pom	BP	GO:0048736	appendage development	26/490	172/15707	2.4e-11	1.95e-09	1.29e-09	64075/14734/14683/20319/14119/21808/12845/20348/14609/16974/14451/22418/12159/21385/218952/53614/20666/21386/18741/20682/17701/14042/218772/230857/20677/12904	26	26	Active	0.311948	1.16646	0.266667	0.700001	0.672506	41	tags=15%, list=8%, signal=15%	Gpc3/Sfrp2/Smoc1/Comp
TM_pom_BP_GO:0060173	TM_pom	BP	GO:0060173	limb development	26/490	172/15707	2.4e-11	1.95e-09	1.29e-09	64075/14734/14683/20319/14119/21808/12845/20348/14609/16974/14451/22418/12159/21385/218952/53614/20666/21386/18741/20682/17701/14042/218772/230857/20677/12904	26	26	Active	0.311948	1.16646	0.266667	0.700001	0.672506	41	tags=15%, list=8%, signal=15%	Gpc3/Sfrp2/Smoc1/Comp
TM_pom_BP_GO:0071772	TM_pom	BP	GO:0071772	response to BMP	24/490	146/15707	2.32e-11	1.95e-09	1.29e-09	14734/21809/20319/14362/21808/13653/12845/17965/16007/66042/22418/12159/68010/20660/20666/18569/15205/18007/21416/17701/14042/240725/20377/20482	24	24	Active	0.370473	1.35109	0.128038	0.659727	0.633814	80	tags=29%, list=16%, signal=26%	Gpc3/Sfrp2/Comp/Ccn1/Tgfb3/Sostdc1/Fzd1
TM_pom_BP_GO:0071773	TM_pom	BP	GO:0071773	cellular response to BMP stimulus	24/490	146/15707	2.32e-11	1.95e-09	1.29e-09	14734/21809/20319/14362/21808/13653/12845/17965/16007/66042/22418/12159/68010/20660/20666/18569/15205/18007/21416/17701/14042/240725/20377/20482	24	24	Active	0.370473	1.35109	0.128038	0.659727	0.633814	80	tags=29%, list=16%, signal=26%	Gpc3/Sfrp2/Comp/Ccn1/Tgfb3/Sostdc1/Fzd1
TM_pom_BP_GO:1903034	TM_pom	BP	GO:1903034	regulation of response to wounding	24/490	146/15707	2.32e-11	1.95e-09	1.29e-09	20720/19242/17242/20496/21825/67916/11475/18595/107589/14609/22417/12490/11465/218952/106014/19091/21824/14062/16600/16001/18007/107351/18213/11816	24	24	Active	0.272974	0.995516	0.46689	0.793843	0.762662	43	tags=21%, list=8%, signal=20%	Serpine2/Thbs1/Slc12a2/Mdk/Plpp3
TM_pom_BP_GO:0016055	TM_pom	BP	GO:0016055	Wnt signaling pathway	40/490	396/15707	5.73e-11	4.34e-09	2.86e-09	22409/14734/17242/22420/12876/67916/17926/72780/20319/21844/14184/14362/93960/56811/13653/14783/13649/319478/16974/66042/22418/50781/22417/68010/24136/218952/53614/16600/22411/18741/20682/21416/107351/14042/11816/21833/240725/20377/20677/12842	40	40	Active	0.258867	1.07951	0.36217	0.737316	0.708355	118	tags=32%, list=23%, signal=27%	Myoc/Gpc3/Sfrp2/Mdk/Plpp3/Cpe/Rspo3/Sostdc1/Fzd1/Fgfr3/Grb10/Tiam1/Lrp6
TM_pom_BP_GO:0198738	TM_pom	BP	GO:0198738	cell-cell signaling by wnt	40/490	397/15707	6.19e-11	4.53e-09	2.99e-09	22409/14734/17242/22420/12876/67916/17926/72780/20319/21844/14184/14362/93960/56811/13653/14783/13649/319478/16974/66042/22418/50781/22417/68010/24136/218952/53614/16600/22411/18741/20682/21416/107351/14042/11816/21833/240725/20377/20677/12842	40	40	Active	0.258867	1.07951	0.36217	0.737316	0.708355	118	tags=32%, list=23%, signal=27%	Myoc/Gpc3/Sfrp2/Mdk/Plpp3/Cpe/Rspo3/Sostdc1/Fzd1/Fgfr3/Grb10/Tiam1/Lrp6
TM_pom_BP_GO:0090092	TM_pom	BP	GO:0090092	regulation of transmembrane receptor protein serine/threonine kinase signaling pathway	29/490	222/15707	6.57e-11	4.66e-09	3.07e-09	14734/65112/21825/21809/110075/20319/14119/14362/14560/21808/17965/16007/66042/22418/12159/68010/20660/20666/16948/18133/15205/18007/21416/17701/240725/50791/24063/20377/20482	29	29	Active	0.354254	1.36051	0.119426	0.659727	0.633814	80	tags=28%, list=16%, signal=25%	Gpc3/Sfrp2/Thbs1/Pmepa1/Ccn1/Tgfb3/Sostdc1/Fzd1
TM_pom_BP_GO:0007517	TM_pom	BP	GO:0007517	muscle organ development	34/490	300/15707	7.7e-11	5.29e-09	3.49e-09	56312/13717/11600/225115/107589/12955/12814/14362/16002/211401/17904/21808/13653/17263/14609/13346/16974/22418/12159/14009/208727/22634/20666/16948/18741/17260/21416/77446/17701/12043/53620/20482/15370/15903	34	34	Active	0.179904	0.721454	0.838307	0.956503	0.918933	132	tags=32%, list=26%, signal=26%	Eln/Angpt1/Svil/Col11a1/Fzd1/Igf2/Cryab/Mylk/Lrp6/Meg3/Myl6
TM_pom_BP_GO:0050678	TM_pom	BP	GO:0050678	regulation of epithelial cell proliferation	37/490	351/15707	9.14e-11	6.18e-09	4.08e-09	16000/19242/56312/14734/20317/17242/21825/13601/20319/64103/14184/16002/211401/20315/21808/13642/18654/13649/14609/16974/14451/22418/12159/20666/20682/14645/15205/11835/17260/12444/21416/11816/22341/240725/12192/20377/15370	37	37	Active	0.265339	1.08738	0.353817	0.733995	0.705165	51	tags=22%, list=10%, signal=21%	Tnmd/Gpc3/Sfrp2/Thbs1/Serpinf1/Mdk/Cxcl12/Pgf
TM_pom_BP_GO:0035107	TM_pom	BP	GO:0035107	appendage morphogenesis	23/490	146/15707	1.48e-10	9.57e-09	6.31e-09	14734/14683/20319/14119/21808/20348/14609/16974/14451/22418/12159/21385/53614/20666/21386/18741/20682/17701/14042/218772/230857/20677/12904	23	23	Active	0.259964	0.937684	0.544333	0.828585	0.796039	13	tags=9%, list=3%, signal=9%	Gpc3/Sfrp2
TM_pom_BP_GO:0035108	TM_pom	BP	GO:0035108	limb morphogenesis	23/490	146/15707	1.48e-10	9.57e-09	6.31e-09	14734/14683/20319/14119/21808/20348/14609/16974/14451/22418/12159/21385/53614/20666/21386/18741/20682/17701/14042/218772/230857/20677/12904	23	23	Active	0.259964	0.937684	0.544333	0.828585	0.796039	13	tags=9%, list=3%, signal=9%	Gpc3/Sfrp2
TM_pom_BP_GO:0030510	TM_pom	BP	GO:0030510	regulation of BMP signaling pathway	18/490	89/15707	2.25e-10	1.43e-08	9.45e-09	14734/20319/14362/17965/16007/66042/22418/12159/68010/20660/20666/15205/18007/21416/17701/240725/20377/20482	18	18	Active	0.358894	1.20377	0.242609	0.696649	0.669286	80	tags=28%, list=16%, signal=24%	Gpc3/Sfrp2/Ccn1/Sostdc1/Fzd1
TM_pom_BP_GO:0003231	TM_pom	BP	GO:0003231	cardiac ventricle development	21/490	124/15707	2.36e-10	1.48e-08	9.76e-09	12876/15902/20319/12814/14362/21808/16007/20348/16974/22418/12159/16911/20666/21386/22411/18741/15205/17260/20564/77446/20677	21	21	Active	0.340769	1.19526	0.249021	0.698266	0.670839	95	tags=33%, list=19%, signal=28%	Sfrp2/Ccn1/Id2/Cpe/Col11a1/Fzd1/Lmo4
TM_pom_BP_GO:0050680	TM_pom	BP	GO:0050680	negative regulation of epithelial cell proliferation	22/490	139/15707	3.4e-10	2.11e-08	1.39e-08	19242/56312/14734/20317/21825/20319/64103/14184/211401/21808/13642/14609/16974/14451/22418/12159/20682/11835/17260/11816/240725/20377	22	22	Active	0.335022	1.18779	0.24862	0.698266	0.670839	35	tags=23%, list=7%, signal=22%	Tnmd/Gpc3/Sfrp2/Thbs1/Serpinf1
TM_pom_BP_GO:0090288	TM_pom	BP	GO:0090288	negative regulation of cellular response to growth factor stimulus	18/490	92/15707	3.99e-10	2.41e-08	1.59e-08	13179/21825/20319/64103/14362/17965/66042/22418/22417/68010/17999/20660/21416/24066/240725/24063/20377/20482	18	18	Active	0.366873	1.23053	0.220928	0.683116	0.656284	18	tags=17%, list=4%, signal=17%	Tnmd/Sfrp2/Thbs1
TM_pom_BP_GO:0060412	TM_pom	BP	GO:0060412	ventricular septum morphogenesis	13/490	44/15707	4.85e-10	2.89e-08	1.91e-08	15902/14362/21808/16974/22418/12159/20666/21386/22411/18741/15205/20564/20677	13	13	Active	0.158317	0.48223	0.977134	1	0.960721	433	tags=100%, list=85%, signal=16%	Id2/Fzd1/Lrp6/Sox11/Pitx2/Slit3/Sox4/Hes1/Tbx3/Bmp4/Wnt11/Tgfb2/Wnt5a
TM_pom_BP_GO:0048754	TM_pom	BP	GO:0048754	branching morphogenesis of an epithelial tube	24/490	169/15707	5.32e-10	3.13e-08	2.06e-08	16000/271127/14734/17313/17242/20496/11600/22420/18595/20319/20315/18654/329628/16974/22418/12159/22417/21386/18741/20682/11835/14042/24063/12043	24	24	Active	0.377084	1.3752	0.115534	0.655371	0.629629	51	tags=33%, list=10%, signal=31%	Gpc3/Sfrp2/Slc12a2/Angpt1/Mdk/Mgp/Cxcl12/Pgf
TM_pom_BP_GO:0060348	TM_pom	BP	GO:0060348	bone development	27/490	212/15707	5.39e-10	3.13e-08	2.06e-08	16000/21825/12111/12643/17926/14683/20319/11647/14184/12845/329628/14609/16974/12159/16998/373864/16948/18741/20682/17260/76566/17701/14042/218772/240725/20148/12842	27	27	Active	0.373762	1.40792	0.0985989	0.638055	0.612993	124	tags=44%, list=24%, signal=36%	Myoc/Sfrp2/Chad/Thbs1/Comp/Bgn/Alpl/Fgfr3/Ltbp3/Lrp6/Fat4/Gnas
TM_pom_BP_GO:0044344	TM_pom	BP	GO:0044344	cellular response to fibroblast growth factor stimulus	17/490	83/15707	5.81e-10	3.32e-08	2.19e-08	14219/21825/14184/68169/329628/12193/22418/396184/22417/21416/14042/24066/240725/12192/24063/20377/15370	17	17	Active	0.284648	0.939205	0.534399	0.823621	0.791271	18	tags=12%, list=4%, signal=12%	Ccn2/Thbs1
TM_pom_BP_GO:0060070	TM_pom	BP	GO:0060070	canonical Wnt signaling pathway	31/490	275/15707	6.17e-10	3.44e-08	2.27e-08	22409/14734/17242/22420/67916/72780/20319/14184/14362/93960/56811/13653/13649/16974/66042/22418/50781/22417/68010/53614/16600/22411/20682/21416/107351/14042/11816/21833/20377/20677/12842	31	31	Active	0.228619	0.895671	0.607819	0.854129	0.82058	89	tags=26%, list=17%, signal=23%	Gpc3/Sfrp2/Mdk/Plpp3/Rspo3/Sostdc1/Fzd1/Fgfr3
TM_pom_BP_GO:0003281	TM_pom	BP	GO:0003281	ventricular septum development	16/490	73/15707	6.46e-10	3.56e-08	2.35e-08	15902/14362/21808/16007/16974/22418/12159/16911/20666/21386/22411/18741/15205/20564/77446/20677	16	16	Active	0.232193	0.751877	0.762974	0.926621	0.890224	118	tags=31%, list=23%, signal=25%	Ccn1/Id2/Fzd1/Lmo4/Lrp6
TM_pom_BP_GO:0071774	TM_pom	BP	GO:0071774	response to fibroblast growth factor	17/490	85/15707	8.59e-10	4.62e-08	3.05e-08	14219/21825/14184/68169/329628/12193/22418/396184/22417/21416/14042/24066/240725/12192/24063/20377/15370	17	17	Active	0.284648	0.939205	0.534399	0.823621	0.791271	18	tags=12%, list=4%, signal=12%	Ccn2/Thbs1
TM_pom_BP_GO:1905114	TM_pom	BP	GO:1905114	cell surface receptor signaling pathway involved in cell-cell signaling	43/490	489/15707	8.84e-10	4.7e-08	3.1e-08	22409/14734/17242/22420/12876/67916/17926/72780/20319/21844/14184/14362/93960/56811/13653/14783/13649/319478/16974/66042/22418/50781/12159/22417/68010/24136/218952/53614/16600/22411/18741/20682/17260/21416/107351/14042/11816/21833/240725/13400/20377/20677/12842	43	43	Active	0.236856	1.00288	0.466381	0.793843	0.762662	118	tags=30%, list=23%, signal=25%	Myoc/Gpc3/Sfrp2/Mdk/Plpp3/Cpe/Rspo3/Sostdc1/Fzd1/Fgfr3/Grb10/Tiam1/Lrp6
TM_pom_BP_GO:0043410	TM_pom	BP	GO:0043410	positive regulation of MAPK cascade	42/490	472/15707	9.8e-10	5.09e-08	3.35e-08	16000/14219/19762/21825/12654/11600/18212/11475/18595/21809/70097/16012/13616/14456/21844/14184/16002/20315/15234/21808/242202/268373/16010/66208/17311/13649/15894/13197/22418/12159/14745/24136/218952/59009/14062/17873/11835/16001/83397/18213/11816/18205	42	42	Active	0.259641	1.09593	0.337769	0.724814	0.696344	93	tags=29%, list=18%, signal=25%	Chil1/Ccn2/Thbs1/Angpt1/Tgfb3/Cxcl12/Gas6/Igfbp4/Igf2/Pde5a/Fgfr3/Icam1
TM_pom_BP_GO:0030324	TM_pom	BP	GO:0030324	lung development	26/490	203/15707	1e-09	5.14e-08	3.38e-08	16000/14219/14734/17313/16011/12654/18595/21809/15483/14184/17263/22418/12159/16598/16998/20666/16948/18741/20682/15205/77446/14042/21833/24063/52377/19662	26	26	Active	0.376323	1.40717	0.0985127	0.638055	0.612993	47	tags=23%, list=9%, signal=22%	Chil1/Gpc3/Ccn2/Igfbp5/Tgfb3/Mgp
TM_pom_BP_GO:0030323	TM_pom	BP	GO:0030323	respiratory tube development	26/490	206/15707	1.38e-09	6.84e-08	4.51e-08	16000/14219/14734/17313/16011/12654/18595/21809/15483/14184/17263/22418/12159/16598/16998/20666/16948/18741/20682/15205/77446/14042/21833/24063/52377/19662	26	26	Active	0.376323	1.40717	0.0985127	0.638055	0.612993	47	tags=23%, list=9%, signal=22%	Chil1/Gpc3/Ccn2/Igfbp5/Tgfb3/Mgp
TM_pom_BP_GO:0002062	TM_pom	BP	GO:0002062	chondrocyte differentiation	18/490	101/15707	1.96e-09	9.12e-08	6.01e-08	14219/17242/13601/12394/20319/12814/12845/12159/16998/373864/20682/18133/17260/76566/14042/218772/240725/208647	18	18	Active	0.413118	1.38564	0.119692	0.659727	0.633814	112	tags=39%, list=22%, signal=31%	Sfrp2/Ccn2/Mdk/Comp/Col11a1/Runx1/Ltbp3
TM_pom_BP_GO:0032970	TM_pom	BP	GO:0032970	regulation of actin filament-based process	37/490	392/15707	2.06e-09	9.48e-08	6.25e-08	98660/14219/18484/17242/19240/13717/225115/11475/21809/17926/11867/211401/21808/19684/14758/15894/12332/22417/21872/14745/11465/218952/19241/18708/22411/17260/20742/22323/107351/18213/11856/11852/18205/58804/17886/260409/50768	37	37	Active	0.27011	1.10693	0.330366	0.722064	0.693703	58	tags=19%, list=11%, signal=18%	Myoc/Ccn2/Pam/Eln/Mdk/Tgfb3/Svil
TM_pom_BP_GO:0060349	TM_pom	BP	GO:0060349	bone morphogenesis	17/490	90/15707	2.18e-09	9.82e-08	6.47e-08	21825/14683/20319/11647/14184/12845/16974/12159/16998/373864/20682/17260/17701/14042/218772/20148/12842	17	17	Active	0.425372	1.40353	0.114245	0.655371	0.629629	124	tags=47%, list=24%, signal=37%	Sfrp2/Thbs1/Comp/Alpl/Fgfr3/Ltbp3/Lrp6/Gnas
TM_pom_BP_GO:0048565	TM_pom	BP	GO:0048565	digestive tract development	18/490	103/15707	2.72e-09	1.2e-07	7.9e-08	18595/15902/20319/14184/14238/13649/329628/22418/12159/21385/20666/18741/15205/21416/14042/218772/20377/12043	18	18	Active	0.177573	0.595598	0.916502	0.98813	0.949317	271	tags=72%, list=53%, signal=35%	Sfrp2/Id2/Fgfr3/Fat4/Foxf2/Egfr/Sfrp1/Sox11/Pitx2/Tcf7l2/Ext1/Bcl2/Hes1
TM_pom_BP_GO:0045785	TM_pom	BP	GO:0045785	positive regulation of cell adhesion	38/490	415/15707	2.89e-09	1.24e-07	8.19e-08	16000/18606/19242/64075/67896/17242/21825/11600/67916/12837/17926/12394/16002/68169/20315/21808/20750/16852/13642/16007/14114/15894/21817/22418/22417/21872/218952/30963/12512/16362/320712/15205/22341/107581/14115/19159/20677/18073	38	38	Active	0.285457	1.17916	0.250171	0.698266	0.670839	99	tags=39%, list=19%, signal=34%	Myoc/Thbs1/Smoc1/Ccdc80/Angpt1/Mdk/Plpp3/Ccn1/Cxcl12/Col8a1/Fbln1/Igf2/Runx1/Icam1/Abi3bp
TM_pom_BP_GO:0030111	TM_pom	BP	GO:0030111	regulation of Wnt signaling pathway	31/490	294/15707	3.18e-09	1.35e-07	8.9e-08	14734/17242/67916/72780/20319/21844/14184/14362/93960/56811/13653/14783/13649/319478/16974/66042/22418/50781/68010/24136/53614/22411/20682/21416/107351/11816/21833/240725/20377/20677/12842	31	31	Active	0.29967	1.17403	0.264292	0.700001	0.672506	118	tags=35%, list=23%, signal=29%	Gpc3/Sfrp2/Mdk/Plpp3/Rspo3/Sostdc1/Fzd1/Fgfr3/Grb10/Tiam1/Lrp6
TM_pom_BP_GO:0060541	TM_pom	BP	GO:0060541	respiratory system development	27/490	230/15707	3.33e-09	1.4e-07	9.24e-08	16000/14219/14734/17313/16011/12654/18595/21809/15483/14184/17263/16974/22418/12159/16598/16998/20666/16948/18741/20682/15205/77446/14042/21833/24063/52377/19662	27	27	Active	0.364708	1.37382	0.115412	0.655371	0.629629	47	tags=22%, list=9%, signal=21%	Chil1/Gpc3/Ccn2/Igfbp5/Tgfb3/Mgp
TM_pom_BP_GO:0010811	TM_pom	BP	GO:0010811	positive regulation of cell-substrate adhesion	20/490	130/15707	3.62e-09	1.5e-07	9.86e-08	18606/19242/64075/67896/17242/21825/12837/17926/68169/20750/16007/14114/22417/218952/30963/320712/22341/107581/14115/18073	20	20	Active	0.359935	1.24508	0.208326	0.676243	0.649681	66	tags=40%, list=13%, signal=36%	Myoc/Thbs1/Smoc1/Ccdc80/Mdk/Ccn1/Col8a1/Fbln1
TM_pom_BP_GO:0032956	TM_pom	BP	GO:0032956	regulation of actin cytoskeleton organization	34/490	348/15707	3.94e-09	1.61e-07	1.06e-07	14219/18484/17242/19240/13717/225115/21809/17926/11867/211401/21808/19684/14758/15894/12332/22417/21872/14745/11465/218952/19241/18708/22411/17260/20742/22323/107351/18213/11856/11852/18205/58804/260409/50768	34	34	Active	0.319181	1.27998	0.168459	0.659727	0.633814	73	tags=24%, list=14%, signal=22%	Myoc/Ccn2/Pam/Eln/Mdk/Tgfb3/Svil/Arpc1b
TM_pom_BP_GO:0061041	TM_pom	BP	GO:0061041	regulation of wound healing	18/490	106/15707	4.38e-09	1.78e-07	1.17e-07	20720/20496/21825/67916/11475/18595/107589/14609/22417/12490/11465/218952/106014/19091/21824/14062/107351/11816	18	18	Active	0.346829	1.1633	0.280416	0.703603	0.675966	43	tags=22%, list=8%, signal=21%	Serpine2/Thbs1/Slc12a2/Plpp3
TM_pom_BP_GO:0045165	TM_pom	BP	GO:0045165	cell fate commitment	26/490	222/15707	6.86e-09	2.69e-07	1.77e-07	22409/22420/15902/12394/20319/14184/21808/66042/14451/22418/12159/21385/22417/16911/21386/22411/20682/15205/11835/17260/21416/18213/14042/18205/20377/12043	26	26	Active	0.182569	0.682672	0.861592	0.962643	0.924832	101	tags=27%, list=20%, signal=23%	Sfrp2/Id2/Sostdc1/Fgfr3/Runx1/Lmo4/Gas1
TM_pom_BP_GO:0048546	TM_pom	BP	GO:0048546	digestive tract morphogenesis	12/490	47/15707	1.44e-08	5.38e-07	3.54e-07	18595/15902/20319/14184/13649/22418/12159/20666/18741/21416/20377/12043	12	12	Active	0.262637	0.781082	0.71634	0.911133	0.875345	89	tags=25%, list=17%, signal=21%	Sfrp2/Id2/Fgfr3
TM_pom_BP_GO:0048568	TM_pom	BP	GO:0048568	embryonic organ development	37/490	425/15707	1.82e-08	6.54e-07	4.31e-07	12705/18595/21809/14683/72780/15902/12394/12814/16002/320398/21808/17150/16007/14238/17311/13649/14609/16974/14451/22418/12159/21385/12608/20666/21386/22411/18741/20682/15205/17260/21416/17701/218772/12192/16658/15903/19662	37	37	Active	0.207302	0.849541	0.671345	0.887041	0.852199	124	tags=35%, list=24%, signal=29%	Ccn1/Tgfb3/Id2/Rbp4/Col11a1/Rspo3/Igf2/Runx1/Lrig3/Gas1/Mfap2/Lrp6/Gnas
TM_pom_BP_GO:0001837	TM_pom	BP	GO:0001837	epithelial to mesenchymal transition	20/490	144/15707	2.18e-08	7.73e-07	5.09e-07	17242/21809/20319/21844/21808/14609/16974/22418/12159/68010/218952/22411/20682/18569/76566/21416/17701/24063/20377/12842	20	20	Active	0.230258	0.796506	0.727724	0.914611	0.878686	46	tags=15%, list=9%, signal=14%	Sfrp2/Mdk/Tgfb3
TM_pom_BP_GO:2000027	TM_pom	BP	GO:2000027	regulation of animal organ morphogenesis	18/490	117/15707	2.2e-08	7.73e-07	5.09e-07	22409/14734/20319/14362/93960/15234/16974/22418/12159/22417/12490/22411/20682/11835/17701/240725/24063/20377	18	18	Active	0.256333	0.859768	0.638595	0.868694	0.834572	13	tags=11%, list=3%, signal=11%	Gpc3/Sfrp2
TM_pom_BP_GO:2000181	TM_pom	BP	GO:2000181	negative regulation of blood vessel morphogenesis	17/490	106/15707	2.87e-08	9.7e-07	6.4e-07	19242/12741/20317/20496/13179/21825/21413/64103/21808/13197/23876/22417/16598/15945/106014/16600/240725	17	17	Active	0.34718	1.14553	0.303395	0.712145	0.684173	35	tags=29%, list=7%, signal=28%	Tnmd/Thbs1/Cxcl10/Slc12a2/Serpinf1
TM_pom_BP_GO:0010466	TM_pom	BP	GO:0010466	negative regulation of peptidase activity	22/490	176/15707	3.08e-08	1.03e-06	6.81e-07	20720/16000/21859/13010/14734/20317/21825/13601/20319/12955/14456/13479/15234/209378/20660/53614/59009/21857/16600/232345/11826/15370	22	22	Active	0.428823	1.52035	0.0573464	0.589987	0.566814	35	tags=32%, list=7%, signal=31%	Serpine2/Timp3/Gpc3/Sfrp2/Cst3/Thbs1/Serpinf1
TM_pom_BP_GO:0007162	TM_pom	BP	GO:0007162	negative regulation of cell adhesion	28/490	273/15707	3.4e-08	1.1e-06	7.24e-07	20720/18606/17242/16777/21825/11600/19252/17926/12394/20315/242202/19684/16852/14114/12159/12608/19091/16362/18708/50706/16600/11898/107351/11856/24066/50768/19084/12842	28	28	Active	0.312627	1.19061	0.243323	0.697343	0.669953	91	tags=32%, list=18%, signal=28%	Myoc/Serpine2/Thbs1/Angpt1/Mdk/Cxcl12/Fbln1/Pde5a/Runx1
TM_pom_BP_GO:1902903	TM_pom	BP	GO:1902903	regulation of supramolecular fiber organization	33/490	363/15707	3.91e-08	1.22e-06	8.07e-07	12759/14219/19240/13717/225115/21809/17926/11867/12955/211401/19684/15894/12332/22417/21872/14745/11465/11568/218952/20393/19241/18708/22411/17260/20742/22323/15481/107351/11856/11816/58804/260409/50768	33	33	Active	0.333375	1.32643	0.133588	0.659727	0.633814	109	tags=30%, list=21%, signal=25%	Myoc/Clu/Ccn2/Eln/Tgfb3/Svil/Arpc1b/Icam1/Cryab/Pik3r1
TM_pom_BP_GO:0030326	TM_pom	BP	GO:0030326	embryonic limb morphogenesis	18/490	122/15707	4.29e-08	1.31e-06	8.64e-07	14734/14683/20319/14119/21808/14609/16974/14451/22418/12159/21385/53614/21386/18741/17701/218772/230857/12904	18	18	Active	0.306929	1.02947	0.423938	0.766778	0.73666	13	tags=11%, list=3%, signal=11%	Gpc3/Sfrp2
TM_pom_BP_GO:0035113	TM_pom	BP	GO:0035113	embryonic appendage morphogenesis	18/490	122/15707	4.29e-08	1.31e-06	8.64e-07	14734/14683/20319/14119/21808/14609/16974/14451/22418/12159/21385/53614/21386/18741/17701/218772/230857/12904	18	18	Active	0.306929	1.02947	0.423938	0.766778	0.73666	13	tags=11%, list=3%, signal=11%	Gpc3/Sfrp2
TM_pom_BP_GO:0070371	TM_pom	BP	GO:0070371	ERK1 and ERK2 cascade	29/490	293/15707	4.24e-08	1.31e-06	8.64e-07	16000/21859/14219/12654/11600/11475/18595/19252/14456/21844/14184/20315/16007/14114/14783/13649/15894/12193/12159/218952/14062/16600/20682/83397/11816/24066/12192/24063/230857	29	29	Active	0.369019	1.41722	0.0898759	0.636415	0.611418	116	tags=41%, list=23%, signal=34%	Chil1/Timp3/Ccn2/Angpt1/Ccn1/Cxcl12/Gas6/Fbln1/Fgfr3/Icam1/Grb10/Tiam1
TM_pom_BP_GO:0016049	TM_pom	BP	GO:0016049	cell growth	39/490	480/15707	4.85e-08	1.46e-06	9.64e-07	20720/16000/16011/21809/19735/29817/20319/12955/21844/13175/20315/21808/16010/20348/13649/14609/14451/22418/396184/232441/24136/20393/19091/18187/107250/16779/13730/50706/22411/20682/18133/20564/17701/18213/11816/56177/20377/12043/12904	39	39	Active	0.230801	0.958468	0.522844	0.817955	0.785827	251	tags=74%, list=49%, signal=41%	Serpine2/Sfrp2/Igfbp5/Tgfb3/Cxcl12/Igfbp4/Gas1/Cryab/Tiam1/Rerg/Dclk1/Flrt1/Sgk1/Nrp2/Igfbp7/Egfr/Kazald1/Prkg1/Emp1/Postn/Sfrp1/Ccn3/Msx1/Olfm1/Apoe/Slit3/Crabp2/Ntrk3/Sox9
TM_pom_BP_GO:0048562	TM_pom	BP	GO:0048562	embryonic organ morphogenesis	27/490	263/15707	5.87e-08	1.75e-06	1.15e-06	18595/21809/14683/15902/12814/320398/21808/17150/14238/14609/16974/14451/22418/12159/21385/20666/21386/22411/18741/20682/15205/17260/21416/17701/218772/16658/19662	27	27	Active	0.193572	0.729165	0.824694	0.952414	0.915005	124	tags=33%, list=24%, signal=27%	Tgfb3/Id2/Rbp4/Col11a1/Lrig3/Gas1/Mfap2/Lrp6/Gnas
TM_pom_BP_GO:0035567	TM_pom	BP	GO:0035567	non-canonical Wnt signaling pathway	12/490	54/15707	7.74e-08	2.24e-06	1.48e-06	14734/17926/72780/20319/21844/14362/93960/16974/22418/22417/22411/20377	12	12	Active	0.54428	1.61869	0.0379292	0.552413	0.530715	118	tags=58%, list=23%, signal=46%	Myoc/Gpc3/Sfrp2/Rspo3/Fzd1/Tiam1/Lrp6
TM_pom_BP_GO:0030879	TM_pom	BP	GO:0030879	mammary gland development	18/490	127/15707	8.08e-08	2.31e-06	1.52e-06	16000/16011/20496/21809/15902/14609/16974/66042/22418/12159/21385/12608/22417/21386/20682/11835/16001/17701	18	18	Active	0.218084	0.731476	0.793048	0.942035	0.905033	77	tags=28%, list=15%, signal=24%	Slc12a2/Igfbp5/Tgfb3/Id2/Sostdc1
TM_pom_BP_GO:0043491	TM_pom	BP	GO:0043491	protein kinase B signaling	22/490	186/15707	8.4e-08	2.39e-06	1.57e-06	16000/16011/21825/12654/11600/18212/17926/14456/16002/20315/13649/218952/16600/16948/20682/16001/21416/18213/27280/12192/50791/52377	22	22	Active	0.465119	1.64903	0.0284951	0.552413	0.530715	54	tags=32%, list=11%, signal=30%	Chil1/Myoc/Thbs1/Angpt1/Igfbp5/Cxcl12/Gas6
TM_pom_BP_GO:0016525	TM_pom	BP	GO:0016525	negative regulation of angiogenesis	16/490	104/15707	1.34e-07	3.73e-06	2.46e-06	19242/12741/20317/20496/13179/21825/21413/64103/21808/13197/23876/16598/15945/106014/16600/240725	16	16	Active	0.363493	1.17705	0.276172	0.702575	0.674979	35	tags=31%, list=7%, signal=30%	Tnmd/Thbs1/Cxcl10/Slc12a2/Serpinf1
TM_pom_BP_GO:0060560	TM_pom	BP	GO:0060560	developmental growth involved in morphogenesis	26/490	257/15707	1.39e-07	3.85e-06	2.54e-06	20496/20319/21844/93960/13175/20315/20348/16974/22418/396184/12159/21385/24136/18187/16779/50706/22411/20682/20564/18213/14042/11816/56177/24063/20377/12904	26	26	Active	0.202802	0.758331	0.787577	0.938843	0.901967	266	tags=69%, list=52%, signal=35%	Sfrp2/Slc12a2/Cxcl12/Tiam1/Lrp6/Dclk1/Flrt1/Nrp2/Postn/Sfrp1/Olfm1/Apoe/Slit3/Crabp2/Ntrk3/Sox9/Lamb2/Ext1
TM_pom_BP_GO:0002683	TM_pom	BP	GO:0002683	negative regulation of immune system process	33/490	384/15707	1.48e-07	4.09e-06	2.69e-06	16000/17242/21825/11600/21809/19252/83924/15902/12394/17470/16002/380732/20315/21808/242202/56045/17965/17311/56496/12159/12608/93694/16362/20666/18708/232345/20682/18133/66058/16658/20377/19084/65963	33	33	Active	0.281951	1.12182	0.317968	0.718566	0.690342	91	tags=39%, list=18%, signal=35%	Thbs1/Gpr137b/Angpt1/Mdk/Tgfb3/Cxcl12/Id2/Tspan6/Cd200/Samhd1/Igf2/Pde5a/Runx1
TM_pom_BP_GO:0010812	TM_pom	BP	GO:0010812	negative regulation of cell-substrate adhesion	12/490	58/15707	1.8e-07	4.89e-06	3.22e-06	18606/21825/17926/16852/14114/18708/50706/107351/11856/24066/50768/12842	12	12	Active	0.312163	0.928374	0.543771	0.828585	0.796039	18	tags=17%, list=4%, signal=16%	Myoc/Thbs1
TM_pom_BP_GO:0110053	TM_pom	BP	GO:0110053	regulation of actin filament organization	26/490	265/15707	2.54e-07	6.6e-06	4.35e-06	14219/19240/13717/225115/21809/17926/11867/211401/19684/15894/12332/22417/21872/14745/11465/218952/19241/18708/22411/20742/22323/107351/11856/58804/260409/50768	26	26	Active	0.316915	1.18503	0.247419	0.698266	0.670839	109	tags=31%, list=21%, signal=26%	Myoc/Ccn2/Eln/Tgfb3/Svil/Arpc1b/Icam1/Pik3r1
TM_pom_BP_GO:0060828	TM_pom	BP	GO:0060828	regulation of canonical Wnt signaling pathway	24/490	233/15707	3.02e-07	7.71e-06	5.08e-06	14734/17242/72780/20319/14184/14362/93960/56811/13653/13649/66042/22418/50781/68010/53614/22411/20682/21416/107351/11816/21833/20377/20677/12842	24	24	Active	0.315548	1.15078	0.288658	0.7059	0.678173	89	tags=29%, list=17%, signal=25%	Gpc3/Sfrp2/Mdk/Rspo3/Sostdc1/Fzd1/Fgfr3
TM_pom_BP_GO:0071560	TM_pom	BP	GO:0071560	cellular response to transforming growth factor beta stimulus	22/490	201/15707	3.31e-07	8.41e-06	5.54e-06	12741/65112/21825/12705/21809/12394/14119/108075/21808/12193/68010/16998/218952/15446/16948/20682/17260/16001/12192/24063/12843/20482	22	22	Active	0.232172	0.823145	0.699377	0.904778	0.869239	117	tags=36%, list=23%, signal=29%	Thbs1/Pmepa1/Tgfb3/Runx1/Fbn2/Ltbp4/Ltbp3/Hpgd
TM_pom_BP_GO:1903035	TM_pom	BP	GO:1903035	negative regulation of response to wounding	13/490	73/15707	3.53e-07	8.91e-06	5.87e-06	20720/17242/20496/21825/18595/14609/22417/12490/106014/19091/21824/18007/11816	13	13	Active	0.451896	1.37647	0.133597	0.659727	0.633814	36	tags=31%, list=7%, signal=29%	Serpine2/Thbs1/Slc12a2/Mdk
TM_pom_BP_GO:0090101	TM_pom	BP	GO:0090101	negative regulation of transmembrane receptor protein serine/threonine kinase signaling pathway	16/490	112/15707	3.81e-07	9.5e-06	6.26e-06	65112/21809/20319/14119/14362/17965/66042/22418/68010/20660/18133/21416/50791/24063/20377/20482	16	16	Active	0.362259	1.17305	0.281738	0.703603	0.675966	103	tags=38%, list=20%, signal=31%	Sfrp2/Pmepa1/Tgfb3/Sostdc1/Fzd1/Fbn2
TM_pom_BP_GO:0071559	TM_pom	BP	GO:0071559	response to transforming growth factor beta	22/490	205/15707	4.67e-07	1.13e-05	7.46e-06	12741/65112/21825/12705/21809/12394/14119/108075/21808/12193/68010/16998/218952/15446/16948/20682/17260/16001/12192/24063/12843/20482	22	22	Active	0.232172	0.823145	0.699377	0.904778	0.869239	117	tags=36%, list=23%, signal=29%	Thbs1/Pmepa1/Tgfb3/Runx1/Fbn2/Ltbp4/Ltbp3/Hpgd
TM_pom_BP_GO:0051896	TM_pom	BP	GO:0051896	regulation of protein kinase B signaling	19/490	158/15707	4.96e-07	1.2e-05	7.88e-06	16000/16011/21825/12654/11600/18212/17926/14456/16002/20315/13649/218952/16600/16001/21416/18213/27280/50791/52377	19	19	Active	0.495139	1.68726	0.0249377	0.552413	0.530715	54	tags=37%, list=11%, signal=34%	Chil1/Myoc/Thbs1/Angpt1/Igfbp5/Cxcl12/Gas6
TM_pom_BP_GO:0043542	TM_pom	BP	GO:0043542	endothelial cell migration	22/490	206/15707	5.07e-07	1.22e-05	8.03e-06	16000/20317/13179/21825/11600/67916/70097/16002/13642/13197/22418/12159/16600/14645/18133/17260/11852/11816/22341/17886/15370/68792	22	22	Active	0.222234	0.78791	0.750846	0.920235	0.88409	43	tags=18%, list=8%, signal=17%	Thbs1/Angpt1/Serpinf1/Plpp3
TM_pom_BP_GO:0003401	TM_pom	BP	GO:0003401	axis elongation	9/490	33/15707	5.14e-07	1.23e-05	8.1e-06	20319/93960/16974/22418/12159/22411/20682/24063/20377	9	9	Active	0.308745	0.834832	0.659843	0.879592	0.845043	13	tags=11%, list=3%, signal=11%	Sfrp2
TM_pom_BP_GO:2000050	TM_pom	BP	GO:2000050	regulation of non-canonical Wnt signaling pathway	8/490	25/15707	5.74e-07	1.35e-05	8.89e-06	14734/72780/20319/21844/93960/16974/22418/20377	8	8	Active	0.556377	1.4493	0.0918969	0.636415	0.611418	118	tags=62%, list=23%, signal=49%	Gpc3/Sfrp2/Rspo3/Tiam1/Lrp6
TM_pom_BP_GO:0001933	TM_pom	BP	GO:0001933	negative regulation of protein phosphorylation	29/490	332/15707	6.11e-07	1.41e-05	9.31e-06	16000/65112/11600/67916/19252/19735/20319/15234/268373/14114/16974/13197/12159/14586/11461/98496/20660/16362/17873/16001/77446/18213/11816/24066/74747/18205/24063/20377/19084	29	29	Active	0.186622	0.716723	0.841056	0.956503	0.918933	43	tags=14%, list=8%, signal=13%	Sfrp2/Pmepa1/Angpt1/Plpp3
TM_pom_BP_GO:0001935	TM_pom	BP	GO:0001935	endothelial cell proliferation	18/490	145/15707	6.16e-07	1.42e-05	9.35e-06	16000/17242/21825/13601/64103/14184/16002/20315/18654/14609/22418/12159/12490/17260/11816/22341/240725/15370	18	18	Active	0.31624	1.0607	0.390432	0.752821	0.723252	89	tags=39%, list=17%, signal=33%	Tnmd/Thbs1/Mdk/Cxcl12/Pgf/Igf2/Fgfr3
TM_pom_BP_GO:0040037	TM_pom	BP	GO:0040037	negative regulation of fibroblast growth factor receptor signaling pathway	7/490	18/15707	6.51e-07	1.49e-05	9.82e-06	21825/22418/22417/21416/24066/240725/24063	7	7	Active	0.33463	0.833488	0.663953	0.882653	0.847983	18	tags=14%, list=4%, signal=14%	Thbs1
TM_pom_BP_GO:0001936	TM_pom	BP	GO:0001936	regulation of endothelial cell proliferation	17/490	131/15707	6.71e-07	1.53e-05	1.01e-05	16000/17242/21825/13601/64103/14184/16002/20315/18654/14609/22418/12159/17260/11816/22341/240725/15370	17	17	Active	0.352973	1.16465	0.284713	0.703603	0.675966	89	tags=41%, list=17%, signal=35%	Tnmd/Thbs1/Mdk/Cxcl12/Pgf/Igf2/Fgfr3
TM_pom_BP_GO:0030177	TM_pom	BP	GO:0030177	positive regulation of Wnt signaling pathway	17/490	133/15707	8.33e-07	1.84e-05	1.21e-05	14734/72780/20319/14184/93960/56811/13649/22418/68010/24136/53614/107351/21833/240725/20377/20677/12842	17	17	Active	0.290928	0.959926	0.508712	0.814735	0.782733	13	tags=12%, list=3%, signal=12%	Gpc3/Sfrp2
TM_pom_BP_GO:0061045	TM_pom	BP	GO:0061045	negative regulation of wound healing	11/490	55/15707	8.42e-07	1.85e-05	1.22e-05	20720/20496/21825/18595/14609/22417/12490/106014/19091/21824/11816	11	11	Active	0.432568	1.24957	0.21603	0.683116	0.656284	29	tags=27%, list=6%, signal=26%	Serpine2/Thbs1/Slc12a2
TM_pom_BP_GO:0031032	TM_pom	BP	GO:0031032	actomyosin structure organization	21/490	196/15707	8.73e-07	1.91e-05	1.26e-05	14219/13717/18595/21809/17926/77579/22417/21872/14745/11465/218952/18708/22411/17260/11856/17886/13822/13008/50768/19084/13007	21	21	Active	0.33358	1.17005	0.271093	0.70096	0.673427	46	tags=19%, list=9%, signal=18%	Myoc/Ccn2/Eln/Tgfb3
TM_pom_BP_GO:0008543	TM_pom	BP	GO:0008543	fibroblast growth factor receptor signaling pathway	12/490	67/15707	9.36e-07	2.03e-05	1.34e-05	14219/21825/14184/329628/22418/396184/22417/21416/14042/24066/240725/24063	12	12	Active	0.380747	1.13234	0.326263	0.721458	0.69312	18	tags=17%, list=4%, signal=16%	Ccn2/Thbs1
TM_pom_BP_GO:0045926	TM_pom	BP	GO:0045926	negative regulation of growth	24/490	249/15707	1.02e-06	2.18e-05	1.43e-05	20720/14734/16011/19735/14683/20319/12955/14184/93960/21808/20348/14609/14451/22418/12159/232441/22411/18133/21416/20564/17701/20377/12043/19662	24	24	Active	0.382031	1.39324	0.104262	0.649204	0.623704	126	tags=42%, list=25%, signal=33%	Serpine2/Gpc3/Sfrp2/Igfbp5/Rbp4/Fgfr3/Gas1/Cryab/Gnas/Rerg
TM_pom_BP_GO:0060350	TM_pom	BP	GO:0060350	endochondral bone morphogenesis	11/490	56/15707	1.02e-06	2.18e-05	1.43e-05	21825/14683/11647/12845/12159/373864/20682/17260/14042/218772/12842	11	11	Active	0.306053	0.884105	0.595079	0.851199	0.817765	83	tags=27%, list=16%, signal=23%	Thbs1/Comp/Alpl
TM_pom_BP_GO:0045861	TM_pom	BP	GO:0045861	negative regulation of proteolysis	25/490	267/15707	1.04e-06	2.21e-05	1.45e-05	20720/16000/21859/13010/14734/20317/21825/13601/20319/12955/14456/13479/15234/209378/14451/20660/53614/59009/21857/18708/16600/103743/232345/11826/15370	25	25	Active	0.401901	1.48634	0.0669823	0.604834	0.581077	35	tags=28%, list=7%, signal=27%	Serpine2/Timp3/Gpc3/Sfrp2/Cst3/Thbs1/Serpinf1
TM_pom_BP_GO:0010951	TM_pom	BP	GO:0010951	negative regulation of endopeptidase activity	17/490	136/15707	1.14e-06	2.4e-05	1.58e-05	20720/16000/21859/20317/21825/20319/12955/14456/13479/15234/20660/53614/59009/21857/16600/11826/15370	17	17	Active	0.461411	1.52244	0.0607149	0.599802	0.576243	54	tags=35%, list=11%, signal=33%	Serpine2/Timp3/Sfrp2/Thbs1/Serpinf1/Gas6
TM_pom_BP_GO:0033555	TM_pom	BP	GO:0033555	multicellular organismal response to stress	13/490	81/15707	1.22e-06	2.54e-05	1.68e-05	98660/17242/21825/12394/13167/14609/72585/17260/14042/11816/17967/12043/12846	13	13	Active	0.332055	1.01143	0.447245	0.782357	0.751627	91	tags=38%, list=18%, signal=32%	Thbs1/Mdk/Lypd1/Dbi/Runx1
TM_pom_BP_GO:0097191	TM_pom	BP	GO:0097191	extrinsic apoptotic signaling pathway	22/490	217/15707	1.23e-06	2.55e-05	1.68e-05	16000/21859/16432/21825/20319/14184/15234/21808/17311/15894/14451/12159/59009/51795/18708/12385/11835/21416/20377/12043/20482/14373	22	22	Active	0.300666	1.06598	0.376848	0.74408	0.714854	18	tags=14%, list=4%, signal=14%	Timp3/Sfrp2/Thbs1
TM_pom_BP_GO:2001236	TM_pom	BP	GO:2001236	regulation of extrinsic apoptotic signaling pathway	18/490	152/15707	1.24e-06	2.55e-05	1.68e-05	16000/21859/21825/20319/15234/21808/15894/14451/12159/59009/51795/12385/11835/21416/20377/12043/20482/14373	18	18	Active	0.35487	1.19027	0.256226	0.69835	0.67092	18	tags=17%, list=4%, signal=17%	Timp3/Sfrp2/Thbs1
TM_pom_BP_GO:0033674	TM_pom	BP	GO:0033674	positive regulation of kinase activity	36/490	483/15707	1.29e-06	2.64e-05	1.74e-05	16000/12759/21825/12654/11600/18212/18595/21809/70097/16012/13616/14456/21844/14184/15234/21808/242202/268373/13653/16007/17311/13649/13197/22418/12159/16911/14745/24136/218952/14062/17873/16001/12444/18213/22341/18205	36	36	Active	0.281052	1.14451	0.291774	0.7059	0.678173	54	tags=19%, list=11%, signal=19%	Chil1/Clu/Thbs1/Angpt1/Ccn1/Tgfb3/Gas6
TM_pom_BP_GO:0014066	TM_pom	BP	GO:0014066	regulation of phosphatidylinositol 3-kinase signaling	14/490	95/15707	1.39e-06	2.83e-05	1.86e-05	20720/16000/13179/11600/18212/17926/15234/21808/13649/14062/16600/20682/16001/18213	14	14	Active	0.3529	1.09703	0.360352	0.737316	0.708355	31	tags=21%, list=6%, signal=21%	Myoc/Serpine2/Angpt1
TM_pom_BP_GO:0030178	TM_pom	BP	GO:0030178	negative regulation of Wnt signaling pathway	18/490	154/15707	1.5e-06	2.98e-05	1.97e-05	14734/17242/20319/14362/93960/56811/13653/14783/319478/16974/66042/22418/50781/22411/20682/21416/11816/20377	18	18	Active	0.377799	1.26718	0.192439	0.669016	0.642738	135	tags=44%, list=26%, signal=34%	Gpc3/Sfrp2/Mdk/Sostdc1/Fzd1/Grb10/Lrp6/Cxxc4
TM_pom_BP_GO:0048844	TM_pom	BP	GO:0048844	artery morphogenesis	12/490	70/15707	1.53e-06	3e-05	1.98e-05	17242/107589/21808/12845/13642/12159/21385/15446/22411/15205/11816/20677	12	12	Active	0.273477	0.813322	0.677872	0.892943	0.857869	117	tags=33%, list=23%, signal=26%	Mdk/Comp/Mylk/Hpgd
TM_pom_BP_GO:0016331	TM_pom	BP	GO:0016331	morphogenesis of embryonic epithelium	19/490	171/15707	1.67e-06	3.25e-05	2.14e-05	22420/20319/14362/21808/16974/22418/12159/22417/16911/24136/20666/20682/11835/22323/22341/240725/50768/20377/20677	19	19	Active	0.145983	0.49746	0.975775	1	0.960721	13	tags=5%, list=3%, signal=5%	Sfrp2
TM_pom_BP_GO:0060688	TM_pom	BP	GO:0060688	regulation of morphogenesis of a branching structure	11/490	59/15707	1.76e-06	3.4e-05	2.24e-05	17242/12876/18595/15234/18654/22418/12159/20682/11835/240725/20377	11	11	Active	0.289302	0.835713	0.657319	0.879592	0.845043	61	tags=27%, list=12%, signal=25%	Mdk/Pgf/Cpe
TM_pom_BP_GO:0030514	TM_pom	BP	GO:0030514	negative regulation of BMP signaling pathway	10/490	48/15707	1.8e-06	3.46e-05	2.28e-05	20319/14362/17965/66042/22418/68010/20660/21416/20377/20482	10	10	Active	0.311479	0.870333	0.614361	0.854458	0.820896	80	tags=30%, list=16%, signal=26%	Sfrp2/Sostdc1/Fzd1
TM_pom_BP_GO:0014065	TM_pom	BP	GO:0014065	phosphatidylinositol 3-kinase signaling	16/490	126/15707	1.91e-06	3.66e-05	2.41e-05	20720/16000/13179/11600/18212/17926/15234/21808/13649/14062/18708/16600/20682/16001/18213/12192	16	16	Active	0.326318	1.05667	0.400251	0.756056	0.726359	31	tags=19%, list=6%, signal=18%	Myoc/Serpine2/Angpt1
TM_pom_BP_GO:0045766	TM_pom	BP	GO:0045766	positive regulation of angiogenesis	18/490	157/15707	1.99e-06	3.79e-05	2.5e-05	17242/21825/12654/19223/13601/70097/12394/20319/16002/15234/18654/22418/12490/21872/16600/11852/22341/11826	18	18	Active	0.478117	1.60365	0.0404945	0.552413	0.530715	51	tags=33%, list=10%, signal=31%	Chil1/Sfrp2/Thbs1/Mdk/Ptgis/Pgf
TM_pom_BP_GO:1904018	TM_pom	BP	GO:1904018	positive regulation of vasculature development	18/490	157/15707	1.99e-06	3.79e-05	2.5e-05	17242/21825/12654/19223/13601/70097/12394/20319/16002/15234/18654/22418/12490/21872/16600/11852/22341/11826	18	18	Active	0.478117	1.60365	0.0404945	0.552413	0.530715	51	tags=33%, list=10%, signal=31%	Chil1/Sfrp2/Thbs1/Mdk/Ptgis/Pgf
TM_pom_BP_GO:0002063	TM_pom	BP	GO:0002063	chondrocyte development	8/490	29/15707	2.04e-06	3.8e-05	2.5e-05	13601/20319/12814/12845/373864/20682/76566/240725	8	8	Active	0.474404	1.23577	0.233517	0.694028	0.666768	71	tags=38%, list=14%, signal=33%	Sfrp2/Comp/Col11a1
TM_pom_BP_GO:0060840	TM_pom	BP	GO:0060840	artery development	14/490	98/15707	2.03e-06	3.8e-05	2.5e-05	17242/107589/21808/12845/13642/77579/12159/21385/15446/16948/22411/15205/11816/20677	14	14	Active	0.29382	0.913371	0.568296	0.831376	0.798721	117	tags=36%, list=23%, signal=28%	Mdk/Comp/Myh10/Mylk/Hpgd
TM_pom_BP_GO:0070372	TM_pom	BP	GO:0070372	regulation of ERK1 and ERK2 cascade	25/490	277/15707	2.03e-06	3.8e-05	2.5e-05	16000/21859/14219/12654/11600/11475/18595/19252/14456/21844/14184/20315/16007/14114/13649/15894/12159/218952/14062/16600/83397/11816/24066/24063/230857	25	25	Active	0.409147	1.51313	0.0599684	0.599802	0.576243	93	tags=40%, list=18%, signal=34%	Chil1/Timp3/Ccn2/Angpt1/Ccn1/Cxcl12/Gas6/Fbln1/Fgfr3/Icam1
TM_pom_BP_GO:0003002	TM_pom	BP	GO:0003002	regionalization	26/490	297/15707	2.25e-06	4.15e-05	2.73e-05	14734/13082/20319/68713/17965/17285/20348/16974/66042/14451/22418/12159/24136/18187/20893/21386/22411/18741/15205/11835/17260/17701/14042/24063/16658/20377	26	26	Active	0.222137	0.830629	0.697113	0.904548	0.869019	118	tags=27%, list=23%, signal=22%	Gpc3/Sfrp2/Cyp26a1/Sostdc1/Gas1/Ifitm1/Lrp6
TM_pom_BP_GO:0010594	TM_pom	BP	GO:0010594	regulation of endothelial cell migration	18/490	159/15707	2.39e-06	4.36e-05	2.88e-05	16000/20317/13179/21825/11600/67916/70097/16002/13197/22418/12159/16600/14645/17260/11852/11816/22341/68792	18	18	Active	0.252324	0.846319	0.656692	0.879592	0.845043	43	tags=22%, list=8%, signal=21%	Thbs1/Angpt1/Serpinf1/Plpp3
TM_pom_BP_GO:0010171	TM_pom	BP	GO:0010171	body morphogenesis	11/490	61/15707	2.48e-06	4.45e-05	2.94e-05	14734/18595/21809/14683/21808/16974/78892/21416/17701/99929/12842	11	11	Active	0.249769	0.721515	0.795549	0.943898	0.906823	46	tags=18%, list=9%, signal=17%	Gpc3/Tgfb3
TM_pom_BP_GO:0007389	TM_pom	BP	GO:0007389	pattern specification process	30/490	376/15707	2.58e-06	4.59e-05	3.02e-05	14734/22420/12705/13082/20319/68713/17965/17285/20348/14609/16974/66042/14451/22418/12159/21385/24136/18187/20893/21386/22411/18741/15205/11835/17260/17701/14042/24063/16658/20377	30	30	Active	0.171087	0.664489	0.889546	0.977824	0.939416	13	tags=7%, list=3%, signal=7%	Gpc3/Sfrp2
TM_pom_BP_GO:0045668	TM_pom	BP	GO:0045668	negative regulation of osteoblast differentiation	10/490	50/15707	2.67e-06	4.73e-05	3.11e-05	16011/12705/15902/14560/68010/208727/20682/22341/20377/15903	10	10	Active	0.214173	0.598441	0.911792	0.987121	0.948348	59	tags=20%, list=12%, signal=18%	Igfbp5/Id2
TM_pom_BP_GO:0072593	TM_pom	BP	GO:0072593	reactive oxygen species metabolic process	24/490	263/15707	2.68e-06	4.74e-05	3.12e-05	16000/12759/14219/21825/19223/53881/53381/12955/16007/13649/15894/13197/23876/16598/12490/98496/14825/208727/16600/11898/74747/12043/14778/11669	24	24	Active	0.365762	1.33391	0.13702	0.659727	0.633814	55	tags=29%, list=11%, signal=27%	Clu/Ccn2/Thbs1/Slc5a3/Ptgis/Ccn1/Prdx4
TM_pom_BP_GO:0098868	TM_pom	BP	GO:0098868	bone growth	8/490	30/15707	2.71e-06	4.74e-05	3.12e-05	21825/13601/12845/23876/373864/20682/14042/218772	8	8	Active	0.404708	1.05422	0.397422	0.756056	0.726359	41	tags=25%, list=8%, signal=23%	Thbs1/Comp
TM_pom_BP_GO:0035116	TM_pom	BP	GO:0035116	embryonic hindlimb morphogenesis	8/490	31/15707	3.55e-06	6.07e-05	4e-05	14734/14683/16974/12159/21386/18741/17701/218772	8	8	Active	0.382341	0.995955	0.459669	0.791189	0.760112	124	tags=38%, list=24%, signal=29%	Gpc3/Lrp6/Gnas
TM_pom_BP_GO:0001657	TM_pom	BP	GO:0001657	ureteric bud development	13/490	89/15707	3.65e-06	6.16e-05	4.06e-05	271127/14734/22420/18654/329628/12159/22417/20682/15205/218772/24063/20377/12043	13	13	Active	0.227643	0.693398	0.82193	0.951224	0.913861	51	tags=15%, list=10%, signal=14%	Gpc3/Pgf
TM_pom_BP_GO:0072163	TM_pom	BP	GO:0072163	mesonephric epithelium development	13/490	89/15707	3.65e-06	6.16e-05	4.06e-05	271127/14734/22420/18654/329628/12159/22417/20682/15205/218772/24063/20377/12043	13	13	Active	0.227643	0.693398	0.82193	0.951224	0.913861	51	tags=15%, list=10%, signal=14%	Gpc3/Pgf
TM_pom_BP_GO:0072164	TM_pom	BP	GO:0072164	mesonephric tubule development	13/490	89/15707	3.65e-06	6.16e-05	4.06e-05	271127/14734/22420/18654/329628/12159/22417/20682/15205/218772/24063/20377/12043	13	13	Active	0.227643	0.693398	0.82193	0.951224	0.913861	51	tags=15%, list=10%, signal=14%	Gpc3/Pgf
TM_pom_BP_GO:0061035	TM_pom	BP	GO:0061035	regulation of cartilage development	11/490	64/15707	4.06e-06	6.79e-05	4.48e-05	14219/17242/21808/16007/22418/12159/16998/20682/76566/218772/13038	11	11	Active	0.431723	1.24713	0.218563	0.683116	0.656284	45	tags=27%, list=9%, signal=25%	Ccn2/Mdk/Ccn1
TM_pom_BP_GO:0061572	TM_pom	BP	GO:0061572	actin filament bundle organization	18/490	166/15707	4.44e-06	7.35e-05	4.84e-05	14219/13717/21809/17926/211401/19684/109624/77579/22417/21872/14745/11465/218952/18708/22411/76566/11856/50768	18	18	Active	0.39709	1.33188	0.150869	0.659727	0.633814	46	tags=22%, list=9%, signal=21%	Myoc/Ccn2/Eln/Tgfb3
TM_pom_BP_GO:0010453	TM_pom	BP	GO:0010453	regulation of cell fate commitment	8/490	32/15707	4.6e-06	7.59e-05	5e-05	20319/66042/22418/12159/16911/22411/15205/11835	8	8	Active	0.41934	1.09233	0.362063	0.737316	0.708355	95	tags=38%, list=19%, signal=31%	Sfrp2/Sostdc1/Lmo4
TM_pom_BP_GO:0001823	TM_pom	BP	GO:0001823	mesonephros development	13/490	91/15707	4.71e-06	7.67e-05	5.05e-05	271127/14734/22420/18654/329628/12159/22417/20682/15205/218772/24063/20377/12043	13	13	Active	0.227643	0.693398	0.82193	0.951224	0.913861	51	tags=15%, list=10%, signal=14%	Gpc3/Pgf
TM_pom_BP_GO:0060026	TM_pom	BP	GO:0060026	convergent extension	6/490	16/15707	5.49e-06	8.78e-05	5.79e-05	20319/93960/16974/22418/22411/20377	6	6	Active	0.393365	0.930897	0.55027	0.830258	0.797647	13	tags=17%, list=3%, signal=16%	Sfrp2
TM_pom_BP_GO:0007160	TM_pom	BP	GO:0007160	cell-matrix adhesion	20/490	203/15707	5.8e-06	9.19e-05	6.05e-05	18606/14219/21825/17926/21844/14758/22417/12490/11465/218952/12512/223272/18708/50706/11856/22341/107581/50768/12043/18073	20	20	Active	0.305301	1.05609	0.393623	0.753244	0.723658	18	tags=15%, list=4%, signal=15%	Myoc/Ccn2/Thbs1
TM_pom_BP_GO:0060443	TM_pom	BP	GO:0060443	mammary gland morphogenesis	10/490	55/15707	6.6e-06	0.000103072	6.79e-05	16011/20496/16974/66042/22418/12159/21385/22417/21386/11835	10	10	Active	0.325269	0.908866	0.565336	0.831376	0.798721	118	tags=40%, list=23%, signal=31%	Slc12a2/Igfbp5/Sostdc1/Lrp6
TM_pom_BP_GO:0090090	TM_pom	BP	GO:0090090	negative regulation of canonical Wnt signaling pathway	15/490	123/15707	6.62e-06	0.000103072	6.79e-05	14734/17242/20319/14362/93960/56811/13653/66042/22418/50781/22411/20682/21416/11816/20377	15	15	Active	0.426478	1.351	0.137844	0.659727	0.633814	80	tags=33%, list=16%, signal=29%	Gpc3/Sfrp2/Mdk/Sostdc1/Fzd1
TM_pom_BP_GO:0021782	TM_pom	BP	GO:0021782	glial cell development	14/490	109/15707	7.3e-06	0.000112482	7.41e-05	12759/17242/18212/17926/15902/14184/13649/16779/20666/17988/21416/22352/18213/20677	14	14	Active	0.466698	1.45078	0.0869878	0.636415	0.611418	59	tags=29%, list=12%, signal=26%	Myoc/Clu/Mdk/Id2
TM_pom_BP_GO:0032231	TM_pom	BP	GO:0032231	regulation of actin filament bundle assembly	14/490	109/15707	7.3e-06	0.000112482	7.41e-05	14219/21809/17926/211401/19684/22417/21872/14745/11465/218952/18708/22411/11856/50768	14	14	Active	0.400569	1.24521	0.222322	0.684015	0.657148	46	tags=21%, list=9%, signal=20%	Myoc/Ccn2/Tgfb3
TM_pom_BP_GO:0045860	TM_pom	BP	GO:0045860	positive regulation of protein kinase activity	31/490	418/15707	7.87e-06	0.000120293	7.93e-05	16000/12759/21825/12654/11600/21809/70097/16012/13616/14456/21844/15234/21808/242202/268373/13653/16007/17311/13649/13197/22418/12159/14745/24136/218952/14062/17873/12444/18213/22341/18205	31	31	Active	0.342088	1.34021	0.127194	0.659727	0.633814	54	tags=23%, list=11%, signal=22%	Chil1/Clu/Thbs1/Angpt1/Ccn1/Tgfb3/Gas6
TM_pom_BP_GO:0048015	TM_pom	BP	GO:0048015	phosphatidylinositol-mediated signaling	17/490	157/15707	8.32e-06	0.000126789	8.36e-05	20720/16000/13179/11600/18212/18595/17926/15234/21808/13649/14062/18708/16600/20682/16001/18213/12192	17	17	Active	0.29783	0.9827	0.480869	0.802624	0.771098	31	tags=18%, list=6%, signal=17%	Myoc/Serpine2/Angpt1
TM_pom_BP_GO:2000377	TM_pom	BP	GO:2000377	regulation of reactive oxygen species metabolic process	19/490	192/15707	9.29e-06	0.000140621	9.27e-05	16000/12759/21825/19223/53881/12955/13649/15894/13197/23876/16598/12490/98496/14825/208727/16600/11898/12043/11669	19	19	Active	0.288308	0.982452	0.485216	0.80296	0.771421	42	tags=21%, list=8%, signal=20%	Clu/Thbs1/Slc5a3/Ptgis
TM_pom_BP_GO:0007015	TM_pom	BP	GO:0007015	actin filament organization	31/490	422/15707	9.51e-06	0.000142114	9.37e-05	14219/19240/13717/225115/21809/17926/11867/211401/19684/109624/15894/12332/77579/22417/21872/14745/11465/218952/19241/18708/22411/76566/20742/22323/107351/11856/11852/58804/260409/50768/12043	31	31	Active	0.291985	1.14392	0.291051	0.7059	0.678173	109	tags=29%, list=21%, signal=24%	Myoc/Ccn2/Eln/Tgfb3/Svil/Arpc1b/Icam1/Myh10/Pik3r1
TM_pom_BP_GO:0060071	TM_pom	BP	GO:0060071	Wnt signaling pathway, planar cell polarity pathway	8/490	35/15707	9.49e-06	0.000142114	9.37e-05	14734/20319/14362/93960/16974/22418/22411/20377	8	8	Active	0.509722	1.32777	0.168692	0.659727	0.633814	13	tags=25%, list=3%, signal=25%	Gpc3/Sfrp2
TM_pom_BP_GO:1900047	TM_pom	BP	GO:1900047	negative regulation of hemostasis	8/490	35/15707	9.49e-06	0.000142114	9.37e-05	20720/21825/18595/12845/12490/19091/21824/11816	8	8	Active	0.498114	1.29753	0.190239	0.662889	0.636852	41	tags=38%, list=8%, signal=35%	Serpine2/Thbs1/Comp
TM_pom_BP_GO:0002790	TM_pom	BP	GO:0002790	peptide secretion	29/490	383/15707	1.04e-05	0.000153813	0.000101365	16000/78896/18484/20496/12876/21809/13616/17470/21844/21808/268373/12845/13649/14609/77579/14062/14645/18133/18007/21416/20502/12289/11816/22341/11826/20377/20677/52377/19662	29	29	Active	0.342155	1.31405	0.148103	0.659727	0.633814	75	tags=28%, list=15%, signal=25%	Ecrg4/Pam/Slc12a2/Comp/Tgfb3/Cpe/Rbp4/Cd200
TM_pom_BP_GO:0052547	TM_pom	BP	GO:0052547	regulation of peptidase activity	27/490	343/15707	1.05e-05	0.000153936	0.000101446	20720/16000/21859/14219/13010/14734/20317/21825/13601/20319/12955/14456/13479/15234/16007/209378/20660/53614/59009/21857/14062/16600/232345/11826/50768/52377/15370	27	27	Active	0.455362	1.7153	0.0152364	0.506547	0.48665	54	tags=37%, list=11%, signal=35%	Serpine2/Timp3/Gpc3/Sfrp2/Cst3/Ccn2/Thbs1/Serpinf1/Ccn1/Gas6
TM_pom_BP_GO:0048017	TM_pom	BP	GO:0048017	inositol lipid-mediated signaling	17/490	160/15707	1.07e-05	0.000156905	0.000103403	20720/16000/13179/11600/18212/18595/17926/15234/21808/13649/14062/18708/16600/20682/16001/18213/12192	17	17	Active	0.29783	0.9827	0.480869	0.802624	0.771098	31	tags=18%, list=6%, signal=17%	Myoc/Serpine2/Angpt1
TM_pom_BP_GO:0001738	TM_pom	BP	GO:0001738	morphogenesis of a polarized epithelium	12/490	84/15707	1.09e-05	0.00015749	0.000103788	14734/20319/14362/93960/14238/329628/16974/22418/11465/11461/22411/20377	12	12	Active	0.395554	1.17638	0.281683	0.703603	0.675966	143	tags=50%, list=28%, signal=37%	Gpc3/Sfrp2/Fzd1/Lrp6/Fat4/Foxf2
TM_pom_BP_GO:0001838	TM_pom	BP	GO:0001838	embryonic epithelial tube formation	16/490	144/15707	1.1e-05	0.00015749	0.000103788	22420/20319/14362/21808/16974/22418/12159/22417/16911/24136/20666/20682/22323/50768/20377/20677	16	16	Active	0.163488	0.529398	0.957982	0.998379	0.959164	13	tags=6%, list=3%, signal=6%	Sfrp2
TM_pom_BP_GO:0003416	TM_pom	BP	GO:0003416	endochondral bone growth	7/490	26/15707	1.08e-05	0.00015749	0.000103788	21825/13601/12845/373864/20682/14042/218772	7	7	Active	0.450118	1.12114	0.332531	0.722064	0.693703	41	tags=29%, list=8%, signal=27%	Thbs1/Comp
TM_pom_BP_GO:0060675	TM_pom	BP	GO:0060675	ureteric bud morphogenesis	10/490	58/15707	1.08e-05	0.00015749	0.000103788	271127/14734/22420/18654/329628/12159/22417/20682/15205/12043	10	10	Active	0.275361	0.769414	0.741206	0.918563	0.882483	51	tags=20%, list=10%, signal=18%	Gpc3/Pgf
TM_pom_BP_GO:0002688	TM_pom	BP	GO:0002688	regulation of leukocyte chemotaxis	14/490	113/15707	1.11e-05	0.000158576	0.000104504	19242/17242/21825/19252/13616/14456/20315/17965/18654/22418/15945/16803/18133/22341	14	14	Active	0.365619	1.13657	0.32225	0.719356	0.6911	54	tags=43%, list=11%, signal=39%	Thbs1/Cxcl10/Mdk/Cxcl12/Pgf/Gas6
TM_pom_BP_GO:1902947	TM_pom	BP	GO:1902947	regulation of tau-protein kinase activity	5/490	11/15707	1.14e-05	0.000162297	0.000106956	12759/15234/13653/20660/11816	5	5	Active	0.571508	1.27128	0.201469	0.6735	0.647046	5	tags=20%, list=1%, signal=20%	Clu
TM_pom_BP_GO:1902904	TM_pom	BP	GO:1902904	negative regulation of supramolecular fiber organization	17/490	161/15707	1.16e-05	0.000164019	0.000108091	12759/19240/225115/17926/12955/19684/12332/21872/20393/19241/18708/20742/15481/107351/11856/11816/50768	17	17	Active	0.379967	1.25371	0.206036	0.676243	0.649681	5	tags=12%, list=1%, signal=12%	Myoc/Clu
TM_pom_BP_GO:0003230	TM_pom	BP	GO:0003230	cardiac atrium development	8/490	36/15707	1.19e-05	0.000165151	0.000108837	21808/16007/16974/22418/22411/18741/77446/20677	8	8	Active	0.156746	0.408306	0.994843	1	0.960721	433	tags=100%, list=85%, signal=16%	Ccn1/Lrp6/Pitx2/Sox4/Heg1/Wnt11/Tgfb2/Wnt5a
TM_pom_BP_GO:0030279	TM_pom	BP	GO:0030279	negative regulation of ossification	8/490	36/15707	1.19e-05	0.000165151	0.000108837	17242/13601/16998/20682/17260/76566/20377/12043	8	8	Active	0.170219	0.443402	0.988214	1	0.960721	36	tags=12%, list=7%, signal=12%	Mdk
TM_pom_BP_GO:0030513	TM_pom	BP	GO:0030513	positive regulation of BMP signaling pathway	8/490	36/15707	1.19e-05	0.000165151	0.000108837	14734/16007/12159/20666/15205/18007/17701/240725	8	8	Active	0.490173	1.27685	0.204972	0.676243	0.649681	45	tags=25%, list=9%, signal=23%	Gpc3/Ccn1
TM_pom_BP_GO:0042249	TM_pom	BP	GO:0042249	establishment of planar polarity of embryonic epithelium	6/490	18/15707	1.21e-05	0.000166182	0.000109516	20319/14362/14238/16974/22418/20377	6	6	Active	0.506179	1.19787	0.266928	0.700001	0.672506	143	tags=67%, list=28%, signal=49%	Sfrp2/Fzd1/Lrp6/Foxf2
TM_pom_BP_GO:0001736	TM_pom	BP	GO:0001736	establishment of planar polarity	10/490	59/15707	1.27e-05	0.000171635	0.00011311	14734/20319/14362/93960/14238/329628/16974/22418/22411/20377	10	10	Active	0.480109	1.34152	0.152178	0.659727	0.633814	143	tags=60%, list=28%, signal=44%	Gpc3/Sfrp2/Fzd1/Lrp6/Fat4/Foxf2
TM_pom_BP_GO:0072171	TM_pom	BP	GO:0072171	mesonephric tubule morphogenesis	10/490	59/15707	1.27e-05	0.000171635	0.00011311	271127/14734/22420/18654/329628/12159/22417/20682/15205/12043	10	10	Active	0.275361	0.769414	0.741206	0.918563	0.882483	51	tags=20%, list=10%, signal=18%	Gpc3/Pgf
TM_pom_BP_GO:0021915	TM_pom	BP	GO:0021915	neural tube development	18/490	179/15707	1.28e-05	0.00017221	0.000113489	20319/14362/21808/20348/16974/14451/22418/12159/16911/24136/20666/15205/21416/22323/12192/50768/20377/20677	18	18	Active	0.216447	0.725985	0.799857	0.946419	0.909245	118	tags=28%, list=23%, signal=22%	Sfrp2/Fzd1/Lmo4/Gas1/Lrp6
TM_pom_BP_GO:0051017	TM_pom	BP	GO:0051017	actin filament bundle assembly	17/490	163/15707	1.37e-05	0.000183909	0.000121199	14219/13717/21809/17926/211401/19684/109624/77579/22417/21872/14745/11465/218952/18708/22411/11856/50768	17	17	Active	0.409147	1.34999	0.139213	0.659727	0.633814	46	tags=24%, list=9%, signal=22%	Myoc/Ccn2/Eln/Tgfb3
TM_pom_BP_GO:0007164	TM_pom	BP	GO:0007164	establishment of tissue polarity	10/490	60/15707	1.48e-05	0.000196134	0.000129255	14734/20319/14362/93960/14238/329628/16974/22418/22411/20377	10	10	Active	0.480109	1.34152	0.152178	0.659727	0.633814	143	tags=60%, list=28%, signal=44%	Gpc3/Sfrp2/Fzd1/Lrp6/Fat4/Foxf2
TM_pom_BP_GO:0051346	TM_pom	BP	GO:0051346	negative regulation of hydrolase activity	26/490	330/15707	1.5e-05	0.00019844	0.000130775	20720/16000/21859/13010/14734/20317/21825/13601/19735/20319/12955/14456/13479/15234/21808/19684/209378/20660/53614/59009/21857/16600/232345/11826/24063/15370	26	26	Active	0.386273	1.44438	0.0818898	0.624461	0.599933	35	tags=27%, list=7%, signal=26%	Serpine2/Timp3/Gpc3/Sfrp2/Cst3/Thbs1/Serpinf1
TM_pom_BP_GO:0001894	TM_pom	BP	GO:0001894	tissue homeostasis	21/490	236/15707	1.65e-05	0.000216426	0.000142628	12741/14219/20496/11600/83924/14683/18671/20750/13649/16974/12490/21872/16998/14062/20682/14042/12043/18783/13038/52377/19662	21	21	Active	0.299417	1.05022	0.393378	0.753244	0.723658	31	tags=19%, list=6%, signal=19%	Ccn2/Gpr137b/Slc12a2/Angpt1
TM_pom_BP_GO:0090100	TM_pom	BP	GO:0090100	positive regulation of transmembrane receptor protein serine/threonine kinase signaling pathway	13/490	102/15707	1.68e-05	0.000219447	0.000144619	14734/21825/21809/110075/14560/21808/16007/12159/20666/15205/18007/17701/240725	13	13	Active	0.491383	1.49674	0.0740007	0.621718	0.597298	46	tags=31%, list=9%, signal=29%	Gpc3/Thbs1/Ccn1/Tgfb3
TM_pom_BP_GO:0042733	TM_pom	BP	GO:0042733	embryonic digit morphogenesis	10/490	61/15707	1.72e-05	0.000222552	0.000146665	20319/14609/16974/14451/22418/12159/21385/21386/17701/230857	10	10	Active	0.27332	0.763711	0.747038	0.919036	0.882938	13	tags=10%, list=3%, signal=10%	Sfrp2
TM_pom_BP_GO:0001952	TM_pom	BP	GO:0001952	regulation of cell-matrix adhesion	14/490	118/15707	1.84e-05	0.000235469	0.000155178	18606/21825/17926/14758/22417/11465/218952/18708/50706/11856/22341/107581/50768/12043	14	14	Active	0.299392	0.930694	0.54619	0.828843	0.796287	18	tags=14%, list=4%, signal=14%	Myoc/Thbs1
TM_pom_BP_GO:0035270	TM_pom	BP	GO:0035270	endocrine system development	13/490	103/15707	1.87e-05	0.000237871	0.00015676	12759/17242/18595/22418/12159/22417/18741/20682/15205/16001/21416/21833/20677	13	13	Active	0.326345	0.994041	0.468131	0.795508	0.764262	36	tags=15%, list=7%, signal=15%	Clu/Mdk
TM_pom_BP_GO:0030595	TM_pom	BP	GO:0030595	leukocyte chemotaxis	19/490	202/15707	1.92e-05	0.000242455	0.000159781	19242/17242/20496/21825/19252/13616/14456/13479/20315/268373/17965/20750/18654/22418/15945/16803/14825/18133/22341	19	19	Active	0.334937	1.14135	0.298896	0.710266	0.682368	54	tags=37%, list=11%, signal=34%	Thbs1/Cxcl10/Slc12a2/Mdk/Cxcl12/Pgf/Gas6
TM_pom_BP_GO:0035282	TM_pom	BP	GO:0035282	segmentation	12/490	89/15707	1.99e-05	0.000251013	0.000165421	20319/68713/17285/20348/16974/22418/12159/24136/18187/21386/16658/20377	12	12	Active	0.227815	0.677524	0.839116	0.956503	0.918933	13	tags=8%, list=3%, signal=8%	Sfrp2
TM_pom_BP_GO:0072175	TM_pom	BP	GO:0072175	epithelial tube formation	16/490	152/15707	2.18e-05	0.000272652	0.000179682	22420/20319/14362/21808/16974/22418/12159/22417/16911/24136/20666/20682/22323/50768/20377/20677	16	16	Active	0.163488	0.529398	0.957982	0.998379	0.959164	13	tags=6%, list=3%, signal=6%	Sfrp2
TM_pom_BP_GO:0035137	TM_pom	BP	GO:0035137	hindlimb morphogenesis	8/490	39/15707	2.22e-05	0.000275	0.000181229	14734/14683/16974/12159/21386/18741/17701/218772	8	8	Active	0.382341	0.995955	0.459669	0.791189	0.760112	124	tags=38%, list=24%, signal=29%	Gpc3/Lrp6/Gnas
TM_pom_BP_GO:0071604	TM_pom	BP	GO:0071604	transforming growth factor beta production	8/490	39/15707	2.22e-05	0.000275	0.000181229	21825/17470/21808/14114/12490/16998/22411/17022	8	8	Active	0.366126	0.953718	0.511786	0.814735	0.782733	112	tags=50%, list=22%, signal=40%	Thbs1/Fbln1/Cd200/Ltbp3
TM_pom_BP_GO:0090175	TM_pom	BP	GO:0090175	regulation of establishment of planar polarity	8/490	39/15707	2.22e-05	0.000275	0.000181229	14734/20319/14362/93960/16974/22418/22411/20377	8	8	Active	0.509722	1.32777	0.168692	0.659727	0.633814	13	tags=25%, list=3%, signal=25%	Gpc3/Sfrp2
TM_pom_BP_GO:0002040	TM_pom	BP	GO:0002040	sprouting angiogenesis	14/490	120/15707	2.23e-05	0.000275168	0.00018134	21825/11600/72780/13642/18654/12159/16598/21872/53614/16600/14645/22341/15370/68792	14	14	Active	0.370752	1.15252	0.305895	0.713554	0.685527	74	tags=29%, list=14%, signal=25%	Thbs1/Angpt1/Pgf/Rspo3
TM_pom_BP_GO:0050921	TM_pom	BP	GO:0050921	positive regulation of chemotaxis	15/490	136/15707	2.25e-05	0.000277284	0.000182734	19242/17242/21825/13616/14456/21844/20315/18654/22418/14745/15945/16803/18213/22341/18205	15	15	Active	0.378029	1.19752	0.261832	0.699805	0.672318	54	tags=40%, list=11%, signal=37%	Thbs1/Cxcl10/Mdk/Cxcl12/Pgf/Gas6
TM_pom_BP_GO:0001658	TM_pom	BP	GO:0001658	branching involved in ureteric bud morphogenesis	9/490	51/15707	2.46e-05	0.000301438	0.000198652	271127/14734/22420/18654/329628/12159/22417/20682/12043	9	9	Active	0.290753	0.786184	0.718516	0.911281	0.875487	51	tags=22%, list=10%, signal=20%	Gpc3/Pgf
TM_pom_BP_GO:0090263	TM_pom	BP	GO:0090263	positive regulation of canonical Wnt signaling pathway	13/490	106/15707	2.55e-05	0.000310673	0.000204738	14734/72780/20319/14184/56811/13649/68010/53614/107351/21833/20377/20677/12842	13	13	Active	0.356584	1.08615	0.366583	0.739255	0.710218	13	tags=15%, list=3%, signal=15%	Gpc3/Sfrp2
TM_pom_BP_GO:0110020	TM_pom	BP	GO:0110020	regulation of actomyosin structure organization	13/490	106/15707	2.55e-05	0.000310673	0.000204738	14219/21809/17926/22417/21872/14745/11465/218952/18708/22411/17260/11856/50768	13	13	Active	0.429275	1.30756	0.17933	0.661916	0.635917	46	tags=23%, list=9%, signal=22%	Myoc/Ccn2/Tgfb3
TM_pom_BP_GO:0048708	TM_pom	BP	GO:0048708	astrocyte differentiation	11/490	78/15707	2.87e-05	0.000347861	0.000229246	20720/67916/18032/15902/14184/13649/16779/20682/15205/22352/18213	11	11	Active	0.544281	1.57228	0.0526506	0.569789	0.547409	89	tags=45%, list=17%, signal=38%	Serpine2/Plpp3/Id2/Nfix/Fgfr3
TM_pom_BP_GO:0031333	TM_pom	BP	GO:0031333	negative regulation of protein-containing complex assembly	15/490	139/15707	2.92e-05	0.000349882	0.000230578	12759/65112/19240/225115/12955/19684/12332/16911/20393/20660/19241/20682/20742/107351/21833	15	15	Active	0.373873	1.18436	0.271729	0.701871	0.674303	145	tags=47%, list=28%, signal=34%	Clu/Pmepa1/Svil/Lmo4/Cryab/Rdx/Sgk1
TM_pom_BP_GO:0050708	TM_pom	BP	GO:0050708	regulation of protein secretion	22/490	264/15707	2.9e-05	0.000349882	0.000230578	16000/18484/20496/21809/17470/21844/21808/268373/13649/14609/77579/14062/14645/18133/18007/21416/12289/11816/22341/20377/20677/19662	22	22	Active	0.211923	0.751351	0.788958	0.940121	0.903194	116	tags=32%, list=23%, signal=26%	Pam/Slc12a2/Tgfb3/Rbp4/Cd200/Myh10/Tiam1
TM_pom_BP_GO:1900046	TM_pom	BP	GO:1900046	regulation of hemostasis	9/490	52/15707	2.9e-05	0.000349882	0.000230578	20720/21825/18595/12845/12490/19091/21824/14062/11816	9	9	Active	0.469903	1.2706	0.208554	0.676243	0.649681	41	tags=33%, list=8%, signal=31%	Serpine2/Thbs1/Comp
TM_pom_BP_GO:0048871	TM_pom	BP	GO:0048871	multicellular organismal homeostasis	32/490	472/15707	3.4e-05	0.000400324	0.000263819	12741/14219/20496/11600/83924/14683/22187/18671/13653/20750/17150/14783/13649/14609/16974/12608/12490/21872/16998/14062/20682/16001/14042/21833/11826/12043/18783/13038/16592/52377/14373/19662	32	32	Active	0.208933	0.824374	0.706016	0.909581	0.873854	124	tags=31%, list=24%, signal=25%	Ccn2/Gpr137b/Slc12a2/Angpt1/Rbp4/Grb10/Ltbp3/Mfap2/Lrp6/Gnas
TM_pom_BP_GO:0051897	TM_pom	BP	GO:0051897	positive regulation of protein kinase B signaling	13/490	109/15707	3.45e-05	0.000404052	0.000266276	16000/16011/21825/12654/11600/17926/14456/16002/20315/13649/218952/16001/21416	13	13	Active	0.603379	1.83788	0.00882247	0.506547	0.48665	54	tags=54%, list=11%, signal=49%	Chil1/Myoc/Thbs1/Angpt1/Igfbp5/Cxcl12/Gas6
TM_pom_BP_GO:0010717	TM_pom	BP	GO:0010717	regulation of epithelial to mesenchymal transition	12/490	94/15707	3.48e-05	0.000404319	0.000266452	17242/21809/20319/21844/21808/12159/68010/218952/21416/24063/20377/12842	12	12	Active	0.356101	1.05905	0.400324	0.756056	0.726359	46	tags=25%, list=9%, signal=23%	Sfrp2/Mdk/Tgfb3
TM_pom_BP_GO:1902106	TM_pom	BP	GO:1902106	negative regulation of leukocyte differentiation	12/490	94/15707	3.48e-05	0.000404319	0.000266452	17242/83924/15902/12394/12159/93694/16362/18708/66058/16658/20377/65963	12	12	Active	0.401813	1.19499	0.265145	0.700001	0.672506	139	tags=50%, list=27%, signal=37%	Gpr137b/Mdk/Id2/Runx1/Pik3r1/Irf1
TM_pom_BP_GO:0072078	TM_pom	BP	GO:0072078	nephron tubule morphogenesis	10/490	66/15707	3.5e-05	0.000406424	0.000267839	271127/14734/22420/18654/329628/12159/22417/20682/15205/12043	10	10	Active	0.275361	0.769414	0.741206	0.918563	0.882483	51	tags=20%, list=10%, signal=18%	Gpc3/Pgf
TM_pom_BP_GO:0031400	TM_pom	BP	GO:0031400	negative regulation of protein modification process	33/490	495/15707	3.58e-05	0.000414176	0.000272948	16000/65112/11600/67916/19252/19735/20319/13167/15234/268373/14114/16974/13197/12159/14586/11461/98496/20660/16362/17873/320365/16001/77446/18213/11816/24066/74747/18205/24063/20377/20677/19084/100038882	33	33	Active	0.164065	0.652779	0.905375	0.985779	0.947059	43	tags=12%, list=8%, signal=12%	Sfrp2/Pmepa1/Angpt1/Plpp3
TM_pom_BP_GO:0061053	TM_pom	BP	GO:0061053	somite development	11/490	80/15707	3.65e-05	0.000419093	0.000276188	20319/68713/17285/20348/16974/22418/22417/24136/20666/22411/20377	11	11	Active	0.234825	0.678344	0.843315	0.956503	0.918933	13	tags=9%, list=3%, signal=9%	Sfrp2
TM_pom_BP_GO:0003209	TM_pom	BP	GO:0003209	cardiac atrium morphogenesis	7/490	31/15707	3.78e-05	0.000430565	0.000283749	21808/16007/16974/22418/18741/77446/20677	7	7	Active	0.178551	0.44473	0.987602	1	0.960721	118	tags=29%, list=23%, signal=22%	Ccn1/Lrp6
TM_pom_BP_GO:0030038	TM_pom	BP	GO:0030038	contractile actin filament bundle assembly	13/490	110/15707	3.8e-05	0.000430565	0.000283749	14219/13717/21809/17926/22417/21872/14745/11465/218952/18708/22411/11856/50768	13	13	Active	0.512074	1.55977	0.0527548	0.569789	0.547409	46	tags=31%, list=9%, signal=29%	Myoc/Ccn2/Eln/Tgfb3
TM_pom_BP_GO:0040036	TM_pom	BP	GO:0040036	regulation of fibroblast growth factor receptor signaling pathway	7/490	31/15707	3.78e-05	0.000430565	0.000283749	21825/22418/22417/21416/24066/240725/24063	7	7	Active	0.33463	0.833488	0.663953	0.882653	0.847983	18	tags=14%, list=4%, signal=14%	Thbs1
TM_pom_BP_GO:0043149	TM_pom	BP	GO:0043149	stress fiber assembly	13/490	110/15707	3.8e-05	0.000430565	0.000283749	14219/13717/21809/17926/22417/21872/14745/11465/218952/18708/22411/11856/50768	13	13	Active	0.512074	1.55977	0.0527548	0.569789	0.547409	46	tags=31%, list=9%, signal=29%	Myoc/Ccn2/Eln/Tgfb3
TM_pom_BP_GO:0051492	TM_pom	BP	GO:0051492	regulation of stress fiber assembly	12/490	95/15707	3.87e-05	0.000435185	0.000286793	14219/21809/17926/22417/21872/14745/11465/218952/18708/22411/11856/50768	12	12	Active	0.459704	1.36716	0.136078	0.659727	0.633814	46	tags=25%, list=9%, signal=23%	Myoc/Ccn2/Tgfb3
TM_pom_BP_GO:0032964	TM_pom	BP	GO:0032964	collagen biosynthetic process	9/490	54/15707	3.96e-05	0.000444756	0.000293101	14219/21809/12159/22417/14062/22352/12831/52377/12842	9	9	Active	0.311539	0.842387	0.649607	0.874821	0.840459	46	tags=22%, list=9%, signal=21%	Ccn2/Tgfb3
TM_pom_BP_GO:1903707	TM_pom	BP	GO:1903707	negative regulation of hemopoiesis	12/490	96/15707	4.3e-05	0.000478716	0.000315481	17242/83924/15902/12394/12159/93694/16362/18708/66058/16658/20377/65963	12	12	Active	0.401813	1.19499	0.265145	0.700001	0.672506	139	tags=50%, list=27%, signal=37%	Gpr137b/Mdk/Id2/Runx1/Pik3r1/Irf1
TM_pom_BP_GO:0045661	TM_pom	BP	GO:0045661	regulation of myoblast differentiation	9/490	55/15707	4.61e-05	0.000501428	0.000330448	66042/12159/15945/18708/21386/20682/17260/12192/15903	9	9	Active	0.330046	0.892429	0.590386	0.8484	0.815076	109	tags=33%, list=21%, signal=27%	Cxcl10/Sostdc1/Pik3r1
TM_pom_BP_GO:0046850	TM_pom	BP	GO:0046850	regulation of bone remodeling	9/490	55/15707	4.61e-05	0.000501428	0.000330448	17242/83924/14184/20750/13649/14609/16974/16998/20377	9	9	Active	0.53364	1.44294	0.0963261	0.638055	0.612993	200	tags=89%, list=39%, signal=55%	Gpr137b/Mdk/Fgfr3/Ltbp3/Lrp6/Spp1/Egfr/Sfrp1
TM_pom_BP_GO:0048662	TM_pom	BP	GO:0048662	negative regulation of smooth muscle cell proliferation	9/490	55/15707	4.61e-05	0.000501428	0.000330448	16011/21809/106014/19091/18708/16600/18569/17260/12846	9	9	Active	0.30224	0.817243	0.682508	0.894392	0.859261	46	tags=22%, list=9%, signal=21%	Igfbp5/Tgfb3
TM_pom_BP_GO:0071692	TM_pom	BP	GO:0071692	protein localization to extracellular region	26/490	352/15707	4.54e-05	0.000501428	0.000330448	16000/18484/20496/21809/17470/14119/21844/21808/268373/12845/17965/13649/14609/77579/14062/14645/18133/18007/21416/12289/11816/22341/20377/20677/52377/19662	26	26	Active	0.236462	0.884194	0.619423	0.854639	0.82107	116	tags=35%, list=23%, signal=28%	Pam/Slc12a2/Comp/Tgfb3/Rbp4/Cd200/Myh10/Fbn2/Tiam1
TM_pom_BP_GO:0071901	TM_pom	BP	GO:0071901	negative regulation of protein serine/threonine kinase activity	13/490	112/15707	4.6e-05	0.000501428	0.000330448	19252/19735/20319/16974/13197/12159/20660/77446/11816/24066/24063/20377/19084	13	13	Active	0.212454	0.647133	0.874505	0.970062	0.931959	13	tags=8%, list=3%, signal=8%	Sfrp2
TM_pom_BP_GO:0090179	TM_pom	BP	GO:0090179	planar cell polarity pathway involved in neural tube closure	5/490	14/15707	4.59e-05	0.000501428	0.000330448	20319/14362/16974/22418/20377	5	5	Active	0.527599	1.1736	0.285445	0.703603	0.675966	118	tags=60%, list=23%, signal=47%	Sfrp2/Fzd1/Lrp6
TM_pom_BP_GO:2000052	TM_pom	BP	GO:2000052	positive regulation of non-canonical Wnt signaling pathway	5/490	14/15707	4.59e-05	0.000501428	0.000330448	14734/72780/93960/22418/20377	5	5	Active	0.482825	1.07401	0.389757	0.752061	0.722521	74	tags=40%, list=14%, signal=35%	Gpc3/Rspo3
TM_pom_BP_GO:0002791	TM_pom	BP	GO:0002791	regulation of peptide secretion	23/490	293/15707	4.91e-05	0.000528521	0.000348303	16000/78896/18484/20496/21809/17470/21844/21808/268373/13649/14609/77579/14062/14645/18133/18007/21416/12289/11816/22341/20377/20677/19662	23	23	Active	0.33993	1.22612	0.217522	0.683116	0.656284	75	tags=26%, list=15%, signal=23%	Ecrg4/Pam/Slc12a2/Tgfb3/Rbp4/Cd200
TM_pom_BP_GO:0060351	TM_pom	BP	GO:0060351	cartilage development involved in endochondral bone morphogenesis	7/490	33/15707	5.82e-05	0.000611241	0.000402816	21825/12845/373864/20682/14042/218772/12842	7	7	Active	0.457629	1.13985	0.316432	0.718566	0.690342	41	tags=29%, list=8%, signal=27%	Thbs1/Comp
TM_pom_BP_GO:0045637	TM_pom	BP	GO:0045637	regulation of myeloid cell differentiation	17/490	183/15707	6.1e-05	0.000634968	0.000418453	83924/14683/15902/12394/14184/17311/12608/93694/18708/16948/17260/18035/12192/16658/50794/20377/100038882	17	17	Active	0.258945	0.854399	0.643614	0.870098	0.835921	200	tags=59%, list=39%, signal=37%	Gpr137b/Id2/Fgfr3/Runx1/Pik3r1/Gnas/Isg15/Nfkbia/Mafb/Sfrp1
TM_pom_BP_GO:0007179	TM_pom	BP	GO:0007179	transforming growth factor beta receptor signaling pathway	16/490	166/15707	6.43e-05	0.000664297	0.000437781	12741/65112/21825/12705/21809/14119/108075/21808/68010/16998/218952/15446/16948/24063/12843/20482	16	16	Active	0.281962	0.913035	0.564374	0.831376	0.798721	117	tags=44%, list=23%, signal=35%	Thbs1/Pmepa1/Tgfb3/Fbn2/Ltbp4/Ltbp3/Hpgd
TM_pom_BP_GO:0032963	TM_pom	BP	GO:0032963	collagen metabolic process	12/490	100/15707	6.46e-05	0.000664558	0.000437953	14219/21809/14184/12159/22417/14062/22352/12831/13038/52377/12843/12842	12	12	Active	0.234913	0.698633	0.815747	0.951224	0.913861	46	tags=17%, list=9%, signal=16%	Ccn2/Tgfb3
TM_pom_BP_GO:2000379	TM_pom	BP	GO:2000379	positive regulation of reactive oxygen species metabolic process	12/490	100/15707	6.46e-05	0.000664558	0.000437953	12759/21825/53881/13649/15894/13197/16598/98496/14825/208727/16600/11898	12	12	Active	0.440328	1.30954	0.176164	0.661916	0.635917	40	tags=25%, list=8%, signal=24%	Clu/Thbs1/Slc5a3
TM_pom_BP_GO:0034109	TM_pom	BP	GO:0034109	homotypic cell-cell adhesion	10/490	71/15707	6.67e-05	0.00068083	0.000448677	20720/67916/18595/14683/268373/19684/12845/16852/19091/17967	10	10	Active	0.44778	1.25119	0.218334	0.683116	0.656284	43	tags=30%, list=8%, signal=28%	Serpine2/Comp/Plpp3
TM_pom_BP_GO:0061430	TM_pom	BP	GO:0061430	bone trabecula morphogenesis	5/490	15/15707	6.71e-05	0.00068083	0.000448677	12643/14119/14184/20377/12842	5	5	Active	0.500613	1.11358	0.347392	0.72763	0.699049	103	tags=60%, list=20%, signal=48%	Chad/Fgfr3/Fbn2
TM_pom_BP_GO:0090178	TM_pom	BP	GO:0090178	regulation of establishment of planar polarity involved in neural tube closure	5/490	15/15707	6.71e-05	0.00068083	0.000448677	20319/14362/16974/22418/20377	5	5	Active	0.527599	1.1736	0.285445	0.703603	0.675966	118	tags=60%, list=23%, signal=47%	Sfrp2/Fzd1/Lrp6
TM_pom_BP_GO:2000095	TM_pom	BP	GO:2000095	regulation of Wnt signaling pathway, planar cell polarity pathway	5/490	15/15707	6.71e-05	0.00068083	0.000448677	14734/20319/93960/16974/20377	5	5	Active	0.689453	1.53364	0.0544154	0.575438	0.552835	13	tags=40%, list=3%, signal=39%	Gpc3/Sfrp2
TM_pom_BP_GO:0030195	TM_pom	BP	GO:0030195	negative regulation of blood coagulation	7/490	34/15707	7.13e-05	0.00071554	0.000471551	20720/21825/18595/12490/19091/21824/11816	7	7	Active	0.483696	1.20478	0.260363	0.698672	0.671229	18	tags=29%, list=4%, signal=28%	Serpine2/Thbs1
TM_pom_BP_GO:0001558	TM_pom	BP	GO:0001558	regulation of cell growth	28/490	404/15707	7.18e-05	0.000718735	0.000473656	20720/16000/16011/19735/29817/20319/12955/20315/21808/16010/20348/13649/14609/14451/22418/232441/20393/107250/22411/18133/20564/17701/18213/11816/56177/20377/12043/12904	28	28	Active	0.226922	0.86421	0.651423	0.876019	0.84161	64	tags=18%, list=12%, signal=17%	Serpine2/Sfrp2/Igfbp5/Cxcl12/Igfbp4
TM_pom_BP_GO:0034103	TM_pom	BP	GO:0034103	regulation of tissue remodeling	10/490	72/15707	7.53e-05	0.000742841	0.000489543	17242/83924/14184/20750/13649/14609/16974/16998/20377/23849	10	10	Active	0.485568	1.35677	0.143065	0.659727	0.633814	168	tags=70%, list=33%, signal=48%	Gpr137b/Mdk/Fgfr3/Ltbp3/Lrp6/Spp1/Egfr
TM_pom_BP_GO:0002690	TM_pom	BP	GO:0002690	positive regulation of leukocyte chemotaxis	11/490	88/15707	8.91e-05	0.000863411	0.000569	19242/17242/21825/13616/14456/20315/18654/22418/15945/16803/22341	11	11	Active	0.439077	1.26837	0.200832	0.6735	0.647046	54	tags=55%, list=11%, signal=50%	Thbs1/Cxcl10/Mdk/Cxcl12/Pgf/Gas6
TM_pom_BP_GO:0010718	TM_pom	BP	GO:0010718	positive regulation of epithelial to mesenchymal transition	8/490	47/15707	9.13e-05	0.000882403	0.000581516	17242/21809/21808/12159/68010/218952/21416/12842	8	8	Active	0.278545	0.725578	0.794843	0.94343	0.906373	46	tags=25%, list=9%, signal=23%	Mdk/Tgfb3
TM_pom_BP_GO:0001502	TM_pom	BP	GO:0001502	cartilage condensation	5/490	16/15707	9.51e-05	0.000903621	0.000595499	14219/12814/21808/20682/21833	5	5	Active	0.527341	1.17303	0.285634	0.703603	0.675966	71	tags=40%, list=14%, signal=35%	Ccn2/Col11a1
TM_pom_BP_GO:0032147	TM_pom	BP	GO:0032147	activation of protein kinase activity	19/490	227/15707	9.47e-05	0.000903621	0.000595499	16000/21825/12654/11600/21809/16012/14456/15234/21808/268373/13649/13197/22418/12159/14745/14062/17873/18213/18205	19	19	Active	0.378871	1.29106	0.174742	0.661916	0.635917	54	tags=26%, list=11%, signal=24%	Chil1/Thbs1/Angpt1/Tgfb3/Gas6
TM_pom_BP_GO:0042659	TM_pom	BP	GO:0042659	regulation of cell fate specification	5/490	16/15707	9.51e-05	0.000903621	0.000595499	20319/22418/16911/22411/11835	5	5	Active	0.453692	1.0092	0.462625	0.792824	0.761683	95	tags=40%, list=19%, signal=33%	Sfrp2/Lmo4
TM_pom_BP_GO:0060571	TM_pom	BP	GO:0060571	morphogenesis of an epithelial fold	6/490	25/15707	9.55e-05	0.000903621	0.000595499	13649/66042/22418/12159/11835/240725	6	6	Active	0.156126	0.369473	0.99944	1	0.960721	433	tags=100%, list=85%, signal=16%	Sostdc1/Egfr/Ar/Sulf1/Bmp4/Wnt5a
TM_pom_BP_GO:0062009	TM_pom	BP	GO:0062009	secondary palate development	6/490	25/15707	9.55e-05	0.000903621	0.000595499	21809/14362/21808/22418/20666/22411	6	6	Active	0.299159	0.707958	0.802276	0.947435	0.910221	80	tags=33%, list=16%, signal=28%	Tgfb3/Fzd1
TM_pom_BP_GO:0072243	TM_pom	BP	GO:0072243	metanephric nephron epithelium development	5/490	16/15707	9.51e-05	0.000903621	0.000595499	329628/16779/20682/15205/11826	5	5	Active	0.370809	0.824835	0.669177	0.885719	0.850929	324	tags=100%, list=63%, signal=37%	Fat4/Sox9/Lamb2/Hes1/Aqp1
TM_pom_BP_GO:0090177	TM_pom	BP	GO:0090177	establishment of planar polarity involved in neural tube closure	5/490	16/15707	9.51e-05	0.000903621	0.000595499	20319/14362/16974/22418/20377	5	5	Active	0.527599	1.1736	0.285445	0.703603	0.675966	118	tags=60%, list=23%, signal=47%	Sfrp2/Fzd1/Lrp6
TM_pom_BP_GO:0050819	TM_pom	BP	GO:0050819	negative regulation of coagulation	7/490	36/15707	0.000104824	0.000983496	0.000648138	20720/21825/18595/12490/19091/21824/11816	7	7	Active	0.483696	1.20478	0.260363	0.698672	0.671229	18	tags=29%, list=4%, signal=28%	Serpine2/Thbs1
TM_pom_BP_GO:0048010	TM_pom	BP	GO:0048010	vascular endothelial growth factor receptor signaling pathway	8/490	48/15707	0.000106588	0.000993786	0.000654919	11600/64103/18654/14783/12159/17999/22341/240725	8	8	Active	0.569257	1.48285	0.0773481	0.621718	0.597298	51	tags=38%, list=10%, signal=34%	Tnmd/Angpt1/Pgf
TM_pom_BP_GO:1901861	TM_pom	BP	GO:1901861	regulation of muscle tissue development	8/490	48/15707	0.000106588	0.000993786	0.000654919	16011/16002/14609/12159/16948/17260/21416/12043	8	8	Active	0.259354	0.675588	0.845304	0.956503	0.918933	87	tags=25%, list=17%, signal=21%	Igfbp5/Igf2
TM_pom_BP_GO:0061180	TM_pom	BP	GO:0061180	mammary gland epithelium development	10/490	75/15707	0.000107159	0.000994955	0.000655689	20496/15902/16974/66042/22418/12608/22417/21386/11835/17701	10	10	Active	0.289758	0.80964	0.689995	0.899156	0.863838	118	tags=40%, list=23%, signal=31%	Slc12a2/Id2/Sostdc1/Lrp6
TM_pom_BP_GO:1902532	TM_pom	BP	GO:1902532	negative regulation of intracellular signal transduction	31/490	480/15707	0.000110375	0.00102269	0.000673967	20720/16000/21859/12759/21825/19252/17926/19735/20319/20315/21808/268373/14114/56496/12159/14745/20660/16600/18133/16001/107351/77446/11816/24066/74747/27280/50791/24063/50768/20377/12043	31	31	Active	0.44828	1.75625	0.00955691	0.506547	0.48665	18	tags=19%, list=4%, signal=20%	Myoc/Clu/Serpine2/Timp3/Sfrp2/Thbs1
TM_pom_BP_GO:0007596	TM_pom	BP	GO:0007596	blood coagulation	14/490	139/15707	0.000113845	0.00105265	0.000693713	20720/21825/18595/14683/14456/268373/12845/14114/12490/19091/21824/14062/11816/18783	14	14	Active	0.434999	1.35224	0.144141	0.659727	0.633814	66	tags=36%, list=13%, signal=32%	Serpine2/Thbs1/Comp/Gas6/Fbln1
TM_pom_BP_GO:0001953	TM_pom	BP	GO:0001953	negative regulation of cell-matrix adhesion	7/490	37/15707	0.000125845	0.00114232	0.000752807	18606/21825/17926/18708/50706/11856/50768	7	7	Active	0.425275	1.05926	0.395263	0.754404	0.724772	18	tags=29%, list=4%, signal=28%	Myoc/Thbs1
TM_pom_BP_GO:0071634	TM_pom	BP	GO:0071634	regulation of transforming growth factor beta production	7/490	37/15707	0.000125845	0.00114232	0.000752807	21825/17470/21808/14114/12490/22411/17022	7	7	Active	0.395477	0.985044	0.483716	0.80296	0.771421	75	tags=43%, list=15%, signal=37%	Thbs1/Fbln1/Cd200
TM_pom_BP_GO:0060572	TM_pom	BP	GO:0060572	morphogenesis of an epithelial bud	5/490	17/15707	0.000131248	0.00118176	0.000778795	66042/22418/12159/11835/240725	5	5	Active	0.155819	0.346606	0.999623	1	0.960721	433	tags=100%, list=85%, signal=16%	Sostdc1/Ar/Sulf1/Bmp4/Wnt5a
TM_pom_BP_GO:0007599	TM_pom	BP	GO:0007599	hemostasis	14/490	141/15707	0.000132701	0.00119244	0.000785833	20720/21825/18595/14683/14456/268373/12845/14114/12490/19091/21824/14062/11816/18783	14	14	Active	0.434999	1.35224	0.144141	0.659727	0.633814	66	tags=36%, list=13%, signal=32%	Serpine2/Thbs1/Comp/Gas6/Fbln1
TM_pom_BP_GO:0022407	TM_pom	BP	GO:0022407	regulation of cell-cell adhesion	27/490	398/15707	0.000137295	0.0012258	0.000807818	20720/16000/17242/67916/12394/16002/20315/242202/19684/16852/13642/15894/22418/12159/12608/22417/21872/19091/23965/16362/18708/16600/15205/11898/50791/20677/19084	27	27	Active	0.259203	0.976392	0.495271	0.806846	0.775154	152	tags=48%, list=30%, signal=36%	Serpine2/Mdk/Plpp3/Cxcl12/Igf2/Pde5a/Runx1/Icam1/Pik3r1/Rdx/Irf1/Tenm3/Lgals1
TM_pom_BP_GO:1902105	TM_pom	BP	GO:1902105	regulation of leukocyte differentiation	21/490	273/15707	0.000137786	0.0012258	0.000807818	17242/83924/14683/15902/12394/14456/14184/17311/12193/12159/12608/93694/59009/16362/18708/66058/12192/16658/20377/20677/65963	21	21	Active	0.350218	1.2284	0.221253	0.683116	0.656284	139	tags=48%, list=27%, signal=36%	Gpr137b/Mdk/Gas6/Id2/Fgfr3/Runx1/Pik3r1/Gnas/Zfp36l2/Irf1
TM_pom_BP_GO:0001666	TM_pom	BP	GO:0001666	response to hypoxia	17/490	196/15707	0.000142348	0.00126136	0.000831256	68655/19223/21809/12955/68169/21808/13653/18654/12490/74747/22341/12192/11826/230857/12043/20677/11670	17	17	Active	0.290652	0.959016	0.50961	0.814735	0.782733	51	tags=24%, list=10%, signal=22%	Fndc1/Ptgis/Tgfb3/Pgf
TM_pom_BP_GO:0006469	TM_pom	BP	GO:0006469	negative regulation of protein kinase activity	17/490	196/15707	0.000142348	0.00126136	0.000831256	19252/19735/20319/268373/16974/13197/12159/11461/20660/17873/16001/77446/11816/24066/24063/20377/19084	17	17	Active	0.172573	0.56941	0.937668	0.995394	0.956297	13	tags=6%, list=3%, signal=6%	Sfrp2
TM_pom_BP_GO:0007411	TM_pom	BP	GO:0007411	axon guidance	18/490	215/15707	0.000143379	0.00126486	0.000833563	13723/20315/21808/13642/20348/14451/22418/77579/14009/18187/16779/20266/18007/20564/22323/14042/17967/18205	18	18	Active	0.215	0.721132	0.805411	0.948922	0.91165	101	tags=22%, list=20%, signal=18%	Emb/Cxcl12/Myh10/Gas1
TM_pom_BP_GO:0050817	TM_pom	BP	GO:0050817	coagulation	14/490	142/15707	0.000143103	0.00126486	0.000833563	20720/21825/18595/14683/14456/268373/12845/14114/12490/19091/21824/14062/11816/18783	14	14	Active	0.434999	1.35224	0.144141	0.659727	0.633814	66	tags=36%, list=13%, signal=32%	Serpine2/Thbs1/Comp/Gas6/Fbln1
TM_pom_BP_GO:0061383	TM_pom	BP	GO:0061383	trabecula morphogenesis	8/490	50/15707	0.000143593	0.00126486	0.000833563	12643/14119/14184/21808/77446/20377/12842/19662	8	8	Active	0.42816	1.11531	0.339595	0.725205	0.69672	103	tags=50%, list=20%, signal=41%	Chad/Rbp4/Fgfr3/Fbn2
TM_pom_BP_GO:0009914	TM_pom	BP	GO:0009914	hormone transport	23/490	315/15707	0.000146704	0.00128973	0.000849948	78896/12876/14683/12394/13616/21844/18671/108075/20750/13649/14609/12971/20666/21386/14645/18133/21416/20502/12289/11826/20377/20677/19662	23	23	Active	0.303664	1.09531	0.349198	0.728897	0.700267	210	tags=61%, list=41%, signal=38%	Ecrg4/Cpe/Rbp4/Runx1/Ltbp4/Tiam1/Gnas/Crym/Spp1/Egfr/Sfrp1/Glul/Sox11/Ccn3
TM_pom_BP_GO:0002088	TM_pom	BP	GO:0002088	lens development in camera-type eye	10/490	78/15707	0.000149659	0.00131311	0.000865361	12955/14184/14609/12159/24136/20666/22352/18213/24063/20482	10	10	Active	0.193227	0.539914	0.949517	0.997559	0.958377	415	tags=100%, list=81%, signal=19%	Fgfr3/Cryab/Sox11/Skil/Ntrk3/Spry1/Bmp4/Gja1/Zeb2/Vim
TM_pom_BP_GO:0097485	TM_pom	BP	GO:0097485	neuron projection guidance	18/490	216/15707	0.000152001	0.00132585	0.000873756	13723/20315/21808/13642/20348/14451/22418/77579/14009/18187/16779/20266/18007/20564/22323/14042/17967/18205	18	18	Active	0.215	0.721132	0.805411	0.948922	0.91165	101	tags=22%, list=20%, signal=18%	Emb/Cxcl12/Myh10/Gas1
TM_pom_BP_GO:0001841	TM_pom	BP	GO:0001841	neural tube formation	13/490	126/15707	0.000155634	0.00135489	0.000892893	20319/14362/21808/16974/22418/12159/16911/24136/20666/22323/50768/20377/20677	13	13	Active	0.264247	0.804891	0.687072	0.898821	0.863517	118	tags=31%, list=23%, signal=24%	Sfrp2/Fzd1/Lmo4/Lrp6
TM_pom_BP_GO:0030193	TM_pom	BP	GO:0030193	regulation of blood coagulation	8/490	51/15707	0.000165724	0.00143435	0.000945258	20720/21825/18595/12490/19091/21824/14062/11816	8	8	Active	0.455169	1.18566	0.274217	0.702419	0.674829	18	tags=25%, list=4%, signal=25%	Serpine2/Thbs1
TM_pom_BP_GO:2000351	TM_pom	BP	GO:2000351	regulation of endothelial cell apoptotic process	8/490	51/15707	0.000165724	0.00143435	0.000945258	21825/11600/14456/12822/68169/15894/12159/18569	8	8	Active	0.498471	1.29846	0.189503	0.661916	0.635917	93	tags=50%, list=18%, signal=42%	Thbs1/Angpt1/Gas6/Icam1
TM_pom_BP_GO:0003149	TM_pom	BP	GO:0003149	membranous septum morphogenesis	4/490	10/15707	0.000169162	0.00145006	0.000955607	15902/14362/21808/12159	4	4	Active	0.454524	0.940818	0.548088	0.830258	0.797647	80	tags=50%, list=16%, signal=43%	Id2/Fzd1
TM_pom_BP_GO:0035633	TM_pom	BP	GO:0035633	maintenance of blood-brain barrier	5/490	18/15707	0.00017709	0.00150073	0.000989004	12741/20496/11600/18671/21872	5	5	Active	0.396372	0.881699	0.604406	0.852402	0.818921	31	tags=40%, list=6%, signal=38%	Slc12a2/Angpt1
TM_pom_BP_GO:0071636	TM_pom	BP	GO:0071636	positive regulation of transforming growth factor beta production	5/490	18/15707	0.00017709	0.00150073	0.000989004	21825/17470/12490/22411/17022	5	5	Active	0.384836	0.856037	0.63039	0.862594	0.828712	75	tags=40%, list=15%, signal=34%	Thbs1/Cd200
TM_pom_BP_GO:0098743	TM_pom	BP	GO:0098743	cell aggregation	5/490	18/15707	0.00017709	0.00150073	0.000989004	14219/12814/21808/20682/21833	5	5	Active	0.527341	1.17303	0.285634	0.703603	0.675966	71	tags=40%, list=14%, signal=35%	Ccn2/Col11a1
TM_pom_BP_GO:0045662	TM_pom	BP	GO:0045662	negative regulation of myoblast differentiation	6/490	28/15707	0.00018764	0.00157223	0.00103612	66042/12159/15945/21386/20682/15903	6	6	Active	0.458642	1.08537	0.371946	0.74192	0.712779	77	tags=33%, list=15%, signal=29%	Cxcl10/Sostdc1
TM_pom_BP_GO:0060444	TM_pom	BP	GO:0060444	branching involved in mammary gland duct morphogenesis	6/490	28/15707	0.00018764	0.00157223	0.00103612	20496/16974/22418/22417/21386/11835	6	6	Active	0.257818	0.610124	0.902444	0.985779	0.947059	29	tags=17%, list=6%, signal=16%	Slc12a2
TM_pom_BP_GO:0002761	TM_pom	BP	GO:0002761	regulation of myeloid leukocyte differentiation	12/490	112/15707	0.000193794	0.00161628	0.00106515	83924/14683/15902/12394/14184/17311/12608/93694/18708/12192/16658/20377	12	12	Active	0.369096	1.09769	0.360237	0.737316	0.708355	124	tags=50%, list=24%, signal=39%	Gpr137b/Id2/Fgfr3/Runx1/Pik3r1/Gnas
TM_pom_BP_GO:0036293	TM_pom	BP	GO:0036293	response to decreased oxygen levels	17/490	202/15707	0.000204667	0.00170213	0.00112173	68655/19223/21809/12955/68169/21808/13653/18654/12490/74747/22341/12192/11826/230857/12043/20677/11670	17	17	Active	0.290652	0.959016	0.50961	0.814735	0.782733	51	tags=24%, list=10%, signal=22%	Fndc1/Ptgis/Tgfb3/Pgf
TM_pom_BP_GO:0043409	TM_pom	BP	GO:0043409	negative regulation of MAPK cascade	15/490	165/15707	0.000207406	0.0017217	0.00113463	16000/21859/19252/19735/20319/268373/14114/12159/20660/16600/16001/11816/24066/24063/20377	15	15	Active	0.297635	0.942852	0.534101	0.823621	0.791271	13	tags=13%, list=3%, signal=13%	Timp3/Sfrp2
TM_pom_BP_GO:0030901	TM_pom	BP	GO:0030901	midbrain development	7/490	40/15707	0.000210199	0.00173201	0.00114142	20319/14184/16974/22418/15205/17701/20377	7	7	Active	0.42182	1.05066	0.404885	0.759942	0.730093	118	tags=43%, list=23%, signal=33%	Sfrp2/Fgfr3/Lrp6
TM_pom_BP_GO:0060603	TM_pom	BP	GO:0060603	mammary gland duct morphogenesis	7/490	40/15707	0.000210199	0.00173201	0.00114142	20496/16974/66042/22418/22417/21386/11835	7	7	Active	0.31924	0.795156	0.709289	0.910087	0.87434	118	tags=43%, list=23%, signal=33%	Slc12a2/Sostdc1/Lrp6
TM_pom_BP_GO:0003208	TM_pom	BP	GO:0003208	cardiac ventricle morphogenesis	9/490	67/15707	0.000222654	0.00181787	0.001198	12876/20319/12814/21808/20348/20666/17260/77446/20677	9	9	Active	0.419322	1.13383	0.323707	0.719724	0.691454	71	tags=33%, list=14%, signal=29%	Sfrp2/Cpe/Col11a1
TM_pom_BP_GO:0043407	TM_pom	BP	GO:0043407	negative regulation of MAP kinase activity	9/490	67/15707	0.000222654	0.00181787	0.001198	19252/19735/20319/12159/20660/11816/24066/24063/20377	9	9	Active	0.292843	0.791833	0.710291	0.910087	0.87434	13	tags=11%, list=3%, signal=11%	Sfrp2
TM_pom_BP_GO:0043433	TM_pom	BP	GO:0043433	negative regulation of DNA-binding transcription factor activity	14/490	148/15707	0.000221579	0.00181787	0.001198	56312/19223/15902/17470/14456/20893/208727/16600/15205/16001/21416/18035/21833/15903	14	14	Active	0.263356	0.818672	0.680985	0.893673	0.858571	75	tags=29%, list=15%, signal=25%	Ptgis/Gas6/Id2/Cd200
TM_pom_BP_GO:0009306	TM_pom	BP	GO:0009306	protein secretion	24/490	346/15707	0.000230034	0.00185745	0.00122408	16000/18484/20496/21809/17470/21844/21808/268373/12845/13649/14609/77579/14062/14645/18133/18007/21416/12289/11816/22341/20377/20677/52377/19662	24	24	Active	0.244538	0.891813	0.604967	0.852402	0.818921	75	tags=25%, list=15%, signal=22%	Pam/Slc12a2/Comp/Tgfb3/Rbp4/Cd200
TM_pom_BP_GO:0032967	TM_pom	BP	GO:0032967	positive regulation of collagen biosynthetic process	6/490	29/15707	0.000230413	0.00185745	0.00122408	14219/21809/12159/22417/14062/22352	6	6	Active	0.478502	1.13237	0.322328	0.719356	0.6911	46	tags=33%, list=9%, signal=31%	Ccn2/Tgfb3
TM_pom_BP_GO:0035592	TM_pom	BP	GO:0035592	establishment of protein localization to extracellular region	24/490	346/15707	0.000230034	0.00185745	0.00122408	16000/18484/20496/21809/17470/21844/21808/268373/12845/13649/14609/77579/14062/14645/18133/18007/21416/12289/11816/22341/20377/20677/52377/19662	24	24	Active	0.244538	0.891813	0.604967	0.852402	0.818921	75	tags=25%, list=15%, signal=22%	Pam/Slc12a2/Comp/Tgfb3/Rbp4/Cd200
TM_pom_BP_GO:0003417	TM_pom	BP	GO:0003417	growth plate cartilage development	5/490	19/15707	0.000234209	0.00187116	0.00123312	21825/12845/373864/20682/218772	5	5	Active	0.639711	1.42299	0.106195	0.649204	0.623704	41	tags=40%, list=8%, signal=37%	Thbs1/Comp
TM_pom_BP_GO:0035988	TM_pom	BP	GO:0035988	chondrocyte proliferation	5/490	19/15707	0.000234209	0.00187116	0.00123312	14219/12845/20682/18133/14042	5	5	Active	0.663187	1.47521	0.0805875	0.624461	0.599933	41	tags=40%, list=8%, signal=37%	Ccn2/Comp
TM_pom_BP_GO:0061323	TM_pom	BP	GO:0061323	cell proliferation involved in heart morphogenesis	5/490	19/15707	0.000234209	0.00187116	0.00123312	16974/12159/18741/20682/15205	5	5	Active	0.321499	0.71515	0.800791	0.946786	0.909598	349	tags=100%, list=68%, signal=32%	Lrp6/Pitx2/Sox9/Hes1/Bmp4
TM_pom_BP_GO:0051403	TM_pom	BP	GO:0051403	stress-activated MAPK cascade	18/490	224/15707	0.00023898	0.00190587	0.00125599	14219/19252/70097/20319/12955/14184/15234/21808/268373/13649/13197/22418/59009/17873/16001/58804/12192/20377	18	18	Active	0.276274	0.926649	0.556531	0.830258	0.797647	15	tags=11%, list=3%, signal=11%	Sfrp2/Ccn2
TM_pom_BP_GO:0033135	TM_pom	BP	GO:0033135	regulation of peptidyl-serine phosphorylation	13/490	132/15707	0.000247929	0.0019702	0.00129839	11600/18212/20319/14456/15234/13649/13197/22418/14586/18213/74747/18205/12043	13	13	Active	0.313511	0.954948	0.510803	0.814735	0.782733	54	tags=23%, list=11%, signal=21%	Sfrp2/Angpt1/Gas6
TM_pom_BP_GO:0072577	TM_pom	BP	GO:0072577	endothelial cell apoptotic process	8/490	54/15707	0.000249528	0.00197938	0.00130444	21825/11600/14456/12822/68169/15894/12159/18569	8	8	Active	0.498471	1.29846	0.189503	0.661916	0.635917	93	tags=50%, list=18%, signal=42%	Thbs1/Angpt1/Gas6/Icam1
TM_pom_BP_GO:2001233	TM_pom	BP	GO:2001233	regulation of apoptotic signaling pathway	25/490	370/15707	0.000256118	0.00201733	0.00132945	16000/21859/56312/12759/21825/20319/22187/20315/15234/21808/268373/15894/14451/12159/22417/59009/51795/12385/11835/21416/17701/20377/12043/20482/14373	25	25	Active	0.342372	1.26618	0.186042	0.661916	0.635917	18	tags=16%, list=4%, signal=16%	Clu/Timp3/Sfrp2/Thbs1
TM_pom_BP_GO:0048251	TM_pom	BP	GO:0048251	elastic fiber assembly	4/490	11/15707	0.000259285	0.00202796	0.00133646	108075/23876/16998/16948	4	4	Active	0.566929	1.17348	0.294396	0.7059	0.678173	224	tags=100%, list=44%, signal=57%	Ltbp4/Ltbp3/Fbln5/Lox
TM_pom_BP_GO:0060346	TM_pom	BP	GO:0060346	bone trabecula formation	4/490	11/15707	0.000259285	0.00202796	0.00133646	12643/14119/20377/12842	4	4	Active	0.443917	0.918862	0.571753	0.832663	0.799958	16	tags=25%, list=3%, signal=24%	Chad
TM_pom_BP_GO:0060415	TM_pom	BP	GO:0060415	muscle tissue morphogenesis	9/490	69/15707	0.000279309	0.00217316	0.00143214	11600/107589/12814/14362/21808/16974/22418/18741/77446	9	9	Active	0.436216	1.17951	0.283312	0.703603	0.675966	118	tags=56%, list=23%, signal=44%	Angpt1/Col11a1/Fzd1/Mylk/Lrp6
TM_pom_BP_GO:0030947	TM_pom	BP	GO:0030947	regulation of vascular endothelial growth factor receptor signaling pathway	6/490	30/15707	0.000280502	0.00217486	0.00143326	11600/64103/14783/12159/17999/22341	6	6	Active	0.584314	1.38278	0.129827	0.659727	0.633814	31	tags=33%, list=6%, signal=32%	Tnmd/Angpt1
TM_pom_BP_GO:0001942	TM_pom	BP	GO:0001942	hair follicle development	11/490	100/15707	0.000282025	0.00217911	0.00143606	22409/16011/14683/12394/13167/21808/13649/66042/22418/20682/12043	11	11	Active	0.241659	0.698086	0.822689	0.951224	0.913861	124	tags=45%, list=24%, signal=35%	Igfbp5/Sostdc1/Dbi/Runx1/Gnas
TM_pom_BP_GO:0050818	TM_pom	BP	GO:0050818	regulation of coagulation	8/490	55/15707	0.000284154	0.00219176	0.0014444	20720/21825/18595/12490/19091/21824/14062/11816	8	8	Active	0.455169	1.18566	0.274217	0.702419	0.674829	18	tags=25%, list=4%, signal=25%	Serpine2/Thbs1
TM_pom_BP_GO:0050918	TM_pom	BP	GO:0050918	positive chemotaxis	7/490	42/15707	0.00028824	0.00221945	0.00146265	11600/20315/18654/22418/18213/22341/18205	7	7	Active	0.555861	1.38453	0.130644	0.659727	0.633814	51	tags=43%, list=10%, signal=39%	Angpt1/Cxcl12/Pgf
TM_pom_BP_GO:0030308	TM_pom	BP	GO:0030308	negative regulation of cell growth	16/490	190/15707	0.00031003	0.00236683	0.00155977	20720/19735/20319/12955/21808/20348/14609/14451/22418/232441/22411/18133/20564/17701/20377/12043	16	16	Active	0.342536	1.10918	0.341354	0.725205	0.69672	13	tags=12%, list=3%, signal=13%	Serpine2/Sfrp2
TM_pom_BP_GO:0043254	TM_pom	BP	GO:0043254	regulation of protein-containing complex assembly	27/490	419/15707	0.000314109	0.00238979	0.00157491	12759/65112/19240/13717/225115/11867/12955/19684/15894/12332/16911/218952/20393/20660/19241/20682/15205/20742/22323/107351/11816/17967/110074/21833/58804/260409/67971	27	27	Active	0.308421	1.16179	0.268476	0.700001	0.672506	102	tags=30%, list=20%, signal=25%	Clu/Pmepa1/Eln/Svil/Arpc1b/Icam1/Lmo4/Cryab
TM_pom_BP_GO:0009952	TM_pom	BP	GO:0009952	anterior/posterior pattern specification	15/490	172/15707	0.000325942	0.00247141	0.00162869	14734/13082/20319/68713/17285/20348/16974/22418/12159/24136/20893/21386/15205/17701/20377	15	15	Active	0.350892	1.11156	0.341731	0.725205	0.69672	50	tags=20%, list=10%, signal=19%	Gpc3/Sfrp2/Cyp26a1
TM_pom_BP_GO:0042493	TM_pom	BP	GO:0042493	response to drug	16/490	191/15707	0.000328884	0.00248949	0.00164061	18484/14683/107589/20319/14456/14362/16002/18671/13479/21808/208727/17260/17967/20377/12043/11670	16	16	Active	0.303289	0.982098	0.482851	0.80296	0.771421	124	tags=44%, list=24%, signal=34%	Sfrp2/Pam/Gas6/Fzd1/Igf2/Mylk/Gnas
TM_pom_BP_GO:0010714	TM_pom	BP	GO:0010714	positive regulation of collagen metabolic process	6/490	31/15707	0.000338752	0.00252988	0.00166723	14219/21809/12159/22417/14062/22352	6	6	Active	0.478502	1.13237	0.322328	0.719356	0.6911	46	tags=33%, list=9%, signal=31%	Ccn2/Tgfb3
TM_pom_BP_GO:0019935	TM_pom	BP	GO:0019935	cyclic-nucleotide-mediated signaling	10/490	86/15707	0.000337316	0.00252988	0.00166723	21825/19735/14683/14745/19091/20682/11816/11826/230857/19084	10	10	Active	0.245466	0.685879	0.8347	0.956503	0.918933	18	tags=10%, list=4%, signal=10%	Thbs1
TM_pom_BP_GO:0071542	TM_pom	BP	GO:0071542	dopaminergic neuron differentiation	6/490	31/15707	0.000338752	0.00252988	0.00166723	20319/21844/20315/16974/22418/20377	6	6	Active	0.570041	1.349	0.14792	0.659727	0.633814	118	tags=67%, list=23%, signal=52%	Sfrp2/Cxcl12/Tiam1/Lrp6
TM_pom_BP_GO:0010595	TM_pom	BP	GO:0010595	positive regulation of endothelial cell migration	11/490	103/15707	0.000365284	0.00270092	0.00177995	16000/21825/11600/67916/70097/16002/22418/12159/11852/22341/68792	11	11	Active	0.284916	0.823046	0.674145	0.890076	0.855115	43	tags=27%, list=8%, signal=26%	Thbs1/Angpt1/Plpp3
TM_pom_BP_GO:0022404	TM_pom	BP	GO:0022404	molting cycle process	11/490	103/15707	0.000365284	0.00270092	0.00177995	22409/16011/14683/12394/13167/21808/13649/66042/22418/20682/12043	11	11	Active	0.241659	0.698086	0.822689	0.951224	0.913861	124	tags=45%, list=24%, signal=35%	Igfbp5/Sostdc1/Dbi/Runx1/Gnas
TM_pom_BP_GO:0022405	TM_pom	BP	GO:0022405	hair cycle process	11/490	103/15707	0.000365284	0.00270092	0.00177995	22409/16011/14683/12394/13167/21808/13649/66042/22418/20682/12043	11	11	Active	0.241659	0.698086	0.822689	0.951224	0.913861	124	tags=45%, list=24%, signal=35%	Igfbp5/Sostdc1/Dbi/Runx1/Gnas
TM_pom_BP_GO:0071675	TM_pom	BP	GO:0071675	regulation of mononuclear cell migration	11/490	103/15707	0.000365284	0.00270092	0.00177995	17242/21825/13601/19252/17470/14456/20315/17965/22418/15945/18133	11	11	Active	0.508961	1.47025	0.0830469	0.625427	0.600861	75	tags=55%, list=15%, signal=48%	Thbs1/Cxcl10/Mdk/Cxcl12/Gas6/Cd200
TM_pom_BP_GO:1903317	TM_pom	BP	GO:1903317	regulation of protein maturation	8/490	57/15707	0.000365202	0.00270092	0.00177995	20720/21825/233744/21922/14451/103743/17886/20677	8	8	Active	0.462319	1.20429	0.259484	0.698672	0.671229	18	tags=25%, list=4%, signal=25%	Serpine2/Thbs1
TM_pom_BP_GO:0052548	TM_pom	BP	GO:0052548	regulation of endopeptidase activity	21/490	294/15707	0.000378524	0.00279119	0.00183943	20720/16000/21859/14219/20317/21825/20319/12955/14456/13479/15234/16007/20660/53614/59009/21857/14062/16600/11826/50768/15370	21	21	Active	0.501454	1.75887	0.0137059	0.506547	0.48665	54	tags=38%, list=11%, signal=36%	Serpine2/Timp3/Sfrp2/Ccn2/Thbs1/Serpinf1/Ccn1/Gas6
TM_pom_BP_GO:0071674	TM_pom	BP	GO:0071674	mononuclear cell migration	14/490	156/15707	0.000381859	0.0028003	0.00184544	17242/20496/21825/13601/19252/17470/14456/20315/17965/15894/22418/15945/18133/14042	14	14	Active	0.512675	1.59371	0.0429547	0.559517	0.53754	93	tags=57%, list=18%, signal=48%	Thbs1/Cxcl10/Slc12a2/Mdk/Cxcl12/Gas6/Cd200/Icam1
TM_pom_BP_GO:0032331	TM_pom	BP	GO:0032331	negative regulation of chondrocyte differentiation	5/490	21/15707	0.000389255	0.0028221	0.0018598	12159/16998/20682/76566/218772	5	5	Active	0.321499	0.71515	0.800791	0.946786	0.909598	349	tags=100%, list=68%, signal=32%	Ltbp3/Rflnb/Sox9/Rarb/Bmp4
TM_pom_BP_GO:0045638	TM_pom	BP	GO:0045638	negative regulation of myeloid cell differentiation	9/490	72/15707	0.000386268	0.0028221	0.0018598	83924/12394/93694/18708/18035/12192/16658/50794/20377	9	9	Active	0.360146	0.973816	0.488576	0.804573	0.772971	200	tags=67%, list=39%, signal=41%	Gpr137b/Runx1/Pik3r1/Nfkbia/Mafb/Sfrp1
TM_pom_BP_GO:0070168	TM_pom	BP	GO:0070168	negative regulation of biomineral tissue development	5/490	21/15707	0.000389255	0.0028221	0.0018598	13601/14456/16998/20682/76566	5	5	Active	0.263934	0.587102	0.926379	0.992396	0.953416	112	tags=40%, list=22%, signal=32%	Gas6/Ltbp3
TM_pom_BP_GO:0110150	TM_pom	BP	GO:0110150	negative regulation of biomineralization	5/490	21/15707	0.000389255	0.0028221	0.0018598	13601/14456/16998/20682/76566	5	5	Active	0.263934	0.587102	0.926379	0.992396	0.953416	112	tags=40%, list=22%, signal=32%	Gas6/Ltbp3
TM_pom_BP_GO:0098773	TM_pom	BP	GO:0098773	skin epidermis development	11/490	104/15707	0.000397257	0.00287079	0.00189189	22409/16011/14683/12394/13167/21808/13649/66042/22418/20682/12043	11	11	Active	0.241659	0.698086	0.822689	0.951224	0.913861	124	tags=45%, list=24%, signal=35%	Igfbp5/Sostdc1/Dbi/Runx1/Gnas
TM_pom_BP_GO:0045686	TM_pom	BP	GO:0045686	negative regulation of glial cell differentiation	6/490	32/15707	0.00040606	0.00292494	0.00192758	15902/14184/12159/103743/15205/18213	6	6	Active	0.368918	0.873042	0.611267	0.854458	0.820896	89	tags=33%, list=17%, signal=28%	Id2/Fgfr3
TM_pom_BP_GO:1900024	TM_pom	BP	GO:1900024	regulation of substrate adhesion-dependent cell spreading	8/490	58/15707	0.000412264	0.00294587	0.00194137	18606/17242/17926/14114/218952/50706/107351/24066	8	8	Active	0.355358	0.925669	0.54825	0.830258	0.797647	66	tags=38%, list=13%, signal=33%	Myoc/Mdk/Fbln1
TM_pom_BP_GO:2001238	TM_pom	BP	GO:2001238	positive regulation of extrinsic apoptotic signaling pathway	8/490	58/15707	0.000412264	0.00294587	0.00194137	21859/21825/21808/51795/12385/20377/20482/14373	8	8	Active	0.563236	1.46717	0.0837937	0.628234	0.603558	18	tags=25%, list=4%, signal=25%	Timp3/Thbs1
TM_pom_BP_GO:0001708	TM_pom	BP	GO:0001708	cell fate specification	9/490	73/15707	0.000428646	0.00305317	0.00201208	20319/22418/21385/16911/21386/22411/20682/11835/18213	9	9	Active	0.316553	0.855944	0.634802	0.865937	0.831924	13	tags=11%, list=3%, signal=11%	Sfrp2
TM_pom_BP_GO:0030099	TM_pom	BP	GO:0030099	myeloid cell differentiation	24/490	361/15707	0.000428012	0.00305317	0.00201208	14734/12183/83924/14683/15902/12394/14184/17150/17311/12159/12608/16598/93694/18708/16948/17260/18035/21833/12192/17886/16658/50794/20377/100038882	24	24	Active	0.312311	1.13898	0.300458	0.711858	0.683897	124	tags=38%, list=24%, signal=30%	Gpc3/Gpr137b/Id2/Bpgm/Fgfr3/Runx1/Pik3r1/Mfap2/Gnas
TM_pom_BP_GO:1902041	TM_pom	BP	GO:1902041	regulation of extrinsic apoptotic signaling pathway via death domain receptors	7/490	45/15707	0.000447298	0.00317588	0.00209295	21859/21825/20319/15234/15894/20377/20482	7	7	Active	0.714814	1.78044	0.00721688	0.506547	0.48665	18	tags=43%, list=4%, signal=42%	Timp3/Sfrp2/Thbs1
TM_pom_BP_GO:0070482	TM_pom	BP	GO:0070482	response to oxygen levels	17/490	216/15707	0.000449147	0.00318396	0.00209827	68655/19223/21809/12955/68169/21808/13653/18654/12490/74747/22341/12192/11826/230857/12043/20677/11670	17	17	Active	0.290652	0.959016	0.50961	0.814735	0.782733	51	tags=24%, list=10%, signal=22%	Fndc1/Ptgis/Tgfb3/Pgf
TM_pom_BP_GO:0050866	TM_pom	BP	GO:0050866	negative regulation of cell activation	16/490	197/15707	0.000464141	0.00327983	0.00216146	20720/17242/18595/15902/12394/17470/380732/242202/12159/12608/19091/16362/20666/11816/20377/19084	16	16	Active	0.370129	1.19854	0.25606	0.69835	0.67092	91	tags=38%, list=18%, signal=32%	Serpine2/Mdk/Id2/Cd200/Pde5a/Runx1
TM_pom_BP_GO:0002687	TM_pom	BP	GO:0002687	positive regulation of leukocyte migration	13/490	141/15707	0.00047215	0.0033259	0.00219182	19242/17242/21825/13616/14456/20315/18654/17311/15894/22418/15945/16803/22341	13	13	Active	0.39303	1.19716	0.265214	0.700001	0.672506	54	tags=46%, list=11%, signal=42%	Thbs1/Cxcl10/Mdk/Cxcl12/Pgf/Gas6
TM_pom_BP_GO:0008625	TM_pom	BP	GO:0008625	extrinsic apoptotic signaling pathway via death domain receptors	9/490	74/15707	0.000474776	0.00333388	0.00219708	21859/21825/20319/15234/15894/18708/20377/12043/20482	9	9	Active	0.636602	1.72134	0.018461	0.549305	0.527729	18	tags=33%, list=4%, signal=33%	Timp3/Sfrp2/Thbs1
TM_pom_BP_GO:0031098	TM_pom	BP	GO:0031098	stress-activated protein kinase signaling cascade	18/490	238/15707	0.000497656	0.00347814	0.00229214	14219/19252/70097/20319/12955/14184/15234/21808/268373/13649/13197/22418/59009/17873/16001/58804/12192/20377	18	18	Active	0.276274	0.926649	0.556531	0.830258	0.797647	15	tags=11%, list=3%, signal=11%	Sfrp2/Ccn2
TM_pom_BP_GO:0033673	TM_pom	BP	GO:0033673	negative regulation of kinase activity	17/490	218/15707	0.000499262	0.00348391	0.00229595	19252/19735/20319/268373/16974/13197/12159/11461/20660/17873/16001/77446/11816/24066/24063/20377/19084	17	17	Active	0.172573	0.56941	0.937668	0.995394	0.956297	13	tags=6%, list=3%, signal=6%	Sfrp2
TM_pom_BP_GO:0001843	TM_pom	BP	GO:0001843	neural tube closure	11/490	107/15707	0.000507596	0.00353654	0.00233063	20319/14362/21808/16974/22418/12159/16911/24136/22323/50768/20377	11	11	Active	0.312852	0.903745	0.569025	0.831376	0.798721	118	tags=36%, list=23%, signal=29%	Sfrp2/Fzd1/Lmo4/Lrp6
TM_pom_BP_GO:0051047	TM_pom	BP	GO:0051047	positive regulation of secretion	22/490	322/15707	0.000509255	0.00354258	0.00233461	16000/78896/20496/21809/12394/13616/20315/21808/268373/20750/13649/14609/77579/20666/14645/21416/12289/22341/11826/20677/18783/19662	22	22	Active	0.311373	1.10394	0.337133	0.724814	0.696344	98	tags=32%, list=19%, signal=27%	Ecrg4/Slc12a2/Tgfb3/Cxcl12/Rbp4/Runx1/Myh10
TM_pom_BP_GO:0003179	TM_pom	BP	GO:0003179	heart valve morphogenesis	7/490	46/15707	0.00051361	0.00354526	0.00233638	21808/16007/12159/20682/17260/20564/20677	7	7	Active	0.192759	0.48012	0.978164	1	0.960721	45	tags=14%, list=9%, signal=13%	Ccn1
TM_pom_BP_GO:0003197	TM_pom	BP	GO:0003197	endocardial cushion development	7/490	46/15707	0.00051361	0.00354526	0.00233638	21825/21808/12159/21385/17999/20682/17701	7	7	Active	0.349055	0.869419	0.623057	0.85589	0.822272	18	tags=14%, list=4%, signal=14%	Thbs1
TM_pom_BP_GO:0090303	TM_pom	BP	GO:0090303	positive regulation of wound healing	7/490	46/15707	0.00051361	0.00354526	0.00233638	21825/67916/107589/11465/218952/14062/107351	7	7	Active	0.442297	1.10166	0.353257	0.733995	0.705165	43	tags=29%, list=8%, signal=27%	Thbs1/Plpp3
TM_pom_BP_GO:0097529	TM_pom	BP	GO:0097529	myeloid leukocyte migration	16/490	199/15707	0.00051875	0.00357521	0.00235612	17242/21825/19252/13616/17470/13479/20315/268373/17965/20750/18654/15945/16803/14825/18133/22341	16	16	Active	0.365926	1.18492	0.267014	0.700001	0.672506	75	tags=38%, list=15%, signal=33%	Thbs1/Cxcl10/Mdk/Cxcl12/Pgf/Cd200
TM_pom_BP_GO:0048644	TM_pom	BP	GO:0048644	muscle organ morphogenesis	9/490	75/15707	0.000524905	0.00359544	0.00236945	11600/107589/12814/14362/21808/16974/22418/18741/77446	9	9	Active	0.436216	1.17951	0.283312	0.703603	0.675966	118	tags=56%, list=23%, signal=44%	Angpt1/Col11a1/Fzd1/Mylk/Lrp6
TM_pom_BP_GO:0035112	TM_pom	BP	GO:0035112	genitalia morphogenesis	4/490	13/15707	0.000534518	0.00363342	0.00239448	16974/11835/21416/19662	4	4	Active	0.531496	1.10014	0.368989	0.740662	0.71157	242	tags=100%, list=47%, signal=53%	Rbp4/Lrp6/Ar/Tcf7l2
TM_pom_BP_GO:1905048	TM_pom	BP	GO:1905048	regulation of metallopeptidase activity	4/490	13/15707	0.000534518	0.00363342	0.00239448	21859/20660/53614/21857	4	4	Active	0.642738	1.3304	0.149943	0.659727	0.633814	7	tags=25%, list=1%, signal=25%	Timp3
TM_pom_BP_GO:1903532	TM_pom	BP	GO:1903532	positive regulation of secretion by cell	21/490	302/15707	0.000539298	0.00366034	0.00241222	16000/78896/20496/21809/12394/13616/20315/21808/268373/20750/13649/14609/77579/20666/14645/21416/12289/22341/20677/18783/19662	21	21	Active	0.321845	1.12888	0.306693	0.713554	0.685527	98	tags=33%, list=19%, signal=28%	Ecrg4/Slc12a2/Tgfb3/Cxcl12/Rbp4/Runx1/Myh10
TM_pom_BP_GO:0060606	TM_pom	BP	GO:0060606	tube closure	11/490	108/15707	0.000549634	0.00371356	0.00244729	20319/14362/21808/16974/22418/12159/16911/24136/22323/50768/20377	11	11	Active	0.312852	0.903745	0.569025	0.831376	0.798721	118	tags=36%, list=23%, signal=29%	Sfrp2/Fzd1/Lmo4/Lrp6
TM_pom_BP_GO:0003094	TM_pom	BP	GO:0003094	glomerular filtration	5/490	23/15707	0.000611352	0.004069	0.00268153	14456/14609/14062/240725/11826	5	5	Active	0.260387	0.57921	0.931463	0.993563	0.954538	54	tags=20%, list=11%, signal=18%	Gas6
TM_pom_BP_GO:0018149	TM_pom	BP	GO:0018149	peptide cross-linking	5/490	23/15707	0.000611352	0.004069	0.00268153	13179/21825/12111/68169/21817	5	5	Active	0.400631	0.891173	0.592732	0.850162	0.816768	63	tags=40%, list=12%, signal=35%	Thbs1/Bgn
TM_pom_BP_GO:1904706	TM_pom	BP	GO:1904706	negative regulation of vascular associated smooth muscle cell proliferation	5/490	23/15707	0.000611352	0.004069	0.00268153	21809/106014/19091/18569/17260	5	5	Active	0.251114	0.558583	0.947468	0.997559	0.958377	46	tags=20%, list=9%, signal=18%	Tgfb3
TM_pom_BP_GO:0002793	TM_pom	BP	GO:0002793	positive regulation of peptide secretion	14/490	164/15707	0.000632312	0.00420224	0.00276934	16000/78896/21809/21808/268373/13649/14609/77579/14645/21416/12289/22341/20677/19662	14	14	Active	0.300664	0.934648	0.540259	0.826038	0.793592	70	tags=21%, list=14%, signal=19%	Ecrg4/Tgfb3/Rbp4
TM_pom_BP_GO:0032330	TM_pom	BP	GO:0032330	regulation of chondrocyte differentiation	7/490	48/15707	0.000669627	0.00437856	0.00288553	14219/17242/12159/16998/20682/76566/218772	7	7	Active	0.524926	1.30747	0.180792	0.661916	0.635917	36	tags=29%, list=7%, signal=27%	Ccn2/Mdk
TM_pom_BP_GO:0035019	TM_pom	BP	GO:0035019	somatic stem cell population maintenance	7/490	48/15707	0.000669627	0.00437856	0.00288553	14184/12193/20682/15205/21416/20377/20677	7	7	Active	0.477228	1.18867	0.272576	0.702419	0.674829	271	tags=100%, list=53%, signal=48%	Fgfr3/Zfp36l2/Sfrp1/Tcf7l2/Sox9/Sox4/Hes1
TM_pom_BP_GO:0048048	TM_pom	BP	GO:0048048	embryonic eye morphogenesis	6/490	35/15707	0.000671999	0.00438764	0.00289152	17150/14238/16974/21385/20666/218772	6	6	Active	0.31909	0.755126	0.750233	0.920235	0.88409	205	tags=67%, list=40%, signal=40%	Mfap2/Lrp6/Foxf2/Sox11
TM_pom_BP_GO:0046879	TM_pom	BP	GO:0046879	hormone secretion	21/490	308/15707	0.000696067	0.00453154	0.00298635	78896/12876/14683/12394/13616/21844/108075/20750/13649/14609/20666/21386/14645/18133/21416/20502/12289/11826/20377/20677/19662	21	21	Active	0.336881	1.18162	0.260235	0.698672	0.671229	210	tags=62%, list=41%, signal=38%	Ecrg4/Cpe/Rbp4/Runx1/Ltbp4/Tiam1/Gnas/Spp1/Egfr/Sfrp1/Glul/Sox11/Ccn3
TM_pom_BP_GO:0030168	TM_pom	BP	GO:0030168	platelet activation	9/490	78/15707	0.000701934	0.00456308	0.00300714	20720/18595/14683/268373/12845/19091/14062/11816/18783	9	9	Active	0.400397	1.08265	0.372144	0.74192	0.712779	41	tags=22%, list=8%, signal=21%	Serpine2/Comp
TM_pom_BP_GO:1903793	TM_pom	BP	GO:1903793	positive regulation of anion transport	28/490	465/15707	0.000717296	0.00464941	0.00306403	16000/78896/14734/20496/21809/12394/13167/14456/18671/20315/21808/268373/20750/13649/14609/77579/12608/20660/18708/14645/21416/18035/12289/11816/22341/20677/18783/19662	28	28	Active	0.363579	1.38466	0.109618	0.651056	0.625484	109	tags=39%, list=21%, signal=33%	Ecrg4/Gpc3/Slc12a2/Tgfb3/Cxcl12/Gas6/Rbp4/Dbi/Runx1/Myh10/Pik3r1
TM_pom_BP_GO:0001756	TM_pom	BP	GO:0001756	somitogenesis	8/490	63/15707	0.000727152	0.00467725	0.00308237	20319/68713/17285/20348/16974/22418/24136/20377	8	8	Active	0.305502	0.795798	0.714365	0.910739	0.874967	118	tags=38%, list=23%, signal=29%	Sfrp2/Ifitm1/Lrp6
TM_pom_BP_GO:0060788	TM_pom	BP	GO:0060788	ectodermal placode formation	4/490	14/15707	0.000729969	0.00467725	0.00308237	14683/16974/21385/21386	4	4	Active	0.324789	0.67228	0.842484	0.956503	0.918933	124	tags=50%, list=24%, signal=38%	Lrp6/Gnas
TM_pom_BP_GO:0071697	TM_pom	BP	GO:0071697	ectodermal placode morphogenesis	4/490	14/15707	0.000729969	0.00467725	0.00308237	14683/16974/21385/21386	4	4	Active	0.324789	0.67228	0.842484	0.956503	0.918933	124	tags=50%, list=24%, signal=38%	Lrp6/Gnas
TM_pom_BP_GO:0072234	TM_pom	BP	GO:0072234	metanephric nephron tubule development	4/490	14/15707	0.000729969	0.00467725	0.00308237	329628/20682/15205/11826	4	4	Active	0.370079	0.766025	0.751231	0.920235	0.88409	324	tags=100%, list=63%, signal=37%	Fat4/Sox9/Hes1/Aqp1
TM_pom_BP_GO:1900025	TM_pom	BP	GO:1900025	negative regulation of substrate adhesion-dependent cell spreading	4/490	14/15707	0.000729969	0.00467725	0.00308237	14114/50706/107351/24066	4	4	Active	0.383858	0.794547	0.721128	0.912834	0.876979	317	tags=100%, list=62%, signal=38%	Fbln1/Postn/Kank1/Spry4
TM_pom_BP_GO:1902043	TM_pom	BP	GO:1902043	positive regulation of extrinsic apoptotic signaling pathway via death domain receptors	4/490	14/15707	0.000729969	0.00467725	0.00308237	21859/21825/20377/20482	4	4	Active	0.814338	1.68559	0.0100341	0.506547	0.48665	18	tags=50%, list=4%, signal=49%	Timp3/Thbs1
TM_pom_BP_GO:0050927	TM_pom	BP	GO:0050927	positive regulation of positive chemotaxis	5/490	24/15707	0.00075262	0.00480172	0.0031644	20315/18654/18213/22341/18205	5	5	Active	0.560376	1.24651	0.223122	0.684015	0.657148	51	tags=40%, list=10%, signal=36%	Cxcl12/Pgf
TM_pom_BP_GO:0097205	TM_pom	BP	GO:0097205	renal filtration	5/490	24/15707	0.00075262	0.00480172	0.0031644	14456/14609/14062/240725/11826	5	5	Active	0.260387	0.57921	0.931463	0.993563	0.954538	54	tags=20%, list=11%, signal=18%	Gas6
TM_pom_BP_GO:0010596	TM_pom	BP	GO:0010596	negative regulation of endothelial cell migration	7/490	49/15707	0.000760572	0.00484553	0.00319327	20317/13179/21825/13197/16600/17260/11816	7	7	Active	0.415426	1.03473	0.42228	0.766778	0.73666	35	tags=29%, list=7%, signal=27%	Thbs1/Serpinf1
TM_pom_BP_GO:0071385	TM_pom	BP	GO:0071385	cellular response to glucocorticoid stimulus	6/490	36/15707	0.000785434	0.00497553	0.00327895	12193/12159/20393/74747/12192/11826	6	6	Active	0.322134	0.76233	0.743705	0.919036	0.882938	349	tags=100%, list=68%, signal=32%	Zfp36l2/Sgk1/Ddit4/Aqp1/Zfp36l1/Bmp4
TM_pom_BP_GO:0010769	TM_pom	BP	GO:0010769	regulation of cell morphogenesis involved in differentiation	11/490	113/15707	0.000805914	0.00509082	0.00335492	18606/17242/17926/19266/21844/14114/218952/20393/50706/107351/24066	11	11	Active	0.351078	1.01417	0.444907	0.781103	0.750422	66	tags=36%, list=13%, signal=32%	Myoc/Mdk/Ptprd/Fbln1
TM_pom_BP_GO:0014020	TM_pom	BP	GO:0014020	primary neural tube formation	11/490	113/15707	0.000805914	0.00509082	0.00335492	20319/14362/21808/16974/22418/12159/16911/24136/22323/50768/20377	11	11	Active	0.312852	0.903745	0.569025	0.831376	0.798721	118	tags=36%, list=23%, signal=29%	Sfrp2/Fzd1/Lmo4/Lrp6
TM_pom_BP_GO:0048704	TM_pom	BP	GO:0048704	embryonic skeletal system morphogenesis	9/490	80/15707	0.000844975	0.00531501	0.00350267	18595/21809/14683/12814/21808/14451/12159/20666/17260	9	9	Active	0.240044	0.649067	0.866021	0.964541	0.926655	124	tags=44%, list=24%, signal=34%	Tgfb3/Col11a1/Gas1/Gnas
TM_pom_BP_GO:0033138	TM_pom	BP	GO:0033138	positive regulation of peptidyl-serine phosphorylation	10/490	97/15707	0.000883696	0.0055197	0.00363756	11600/18212/20319/14456/13649/22418/14586/18213/18205/12043	10	10	Active	0.402188	1.12379	0.328777	0.722025	0.693665	54	tags=30%, list=11%, signal=27%	Sfrp2/Angpt1/Gas6
TM_pom_BP_GO:1903426	TM_pom	BP	GO:1903426	regulation of reactive oxygen species biosynthetic process	10/490	97/15707	0.000883696	0.0055197	0.00363756	16000/12759/19223/53881/15894/16598/12490/208727/16600/11898	10	10	Active	0.336277	0.939625	0.530709	0.823621	0.791271	42	tags=30%, list=8%, signal=28%	Clu/Slc5a3/Ptgis
TM_pom_BP_GO:0010633	TM_pom	BP	GO:0010633	negative regulation of epithelial cell migration	8/490	65/15707	0.000897606	0.00556765	0.00366916	20317/13179/21825/13197/12512/16600/17260/11816	8	8	Active	0.38275	0.99702	0.458748	0.791189	0.760112	35	tags=25%, list=7%, signal=24%	Thbs1/Serpinf1
TM_pom_BP_GO:0032233	TM_pom	BP	GO:0032233	positive regulation of actin filament bundle assembly	8/490	65/15707	0.000897606	0.00556765	0.00366916	14219/21809/17926/211401/22417/14745/218952/22411	8	8	Active	0.578966	1.50814	0.0668508	0.604834	0.581077	46	tags=38%, list=9%, signal=35%	Myoc/Ccn2/Tgfb3
TM_pom_BP_GO:0045670	TM_pom	BP	GO:0045670	regulation of osteoclast differentiation	8/490	65/15707	0.000897606	0.00556765	0.00366916	83924/14683/14184/12608/93694/18708/16658/20377	8	8	Active	0.360009	0.937782	0.533149	0.823621	0.791271	124	tags=50%, list=24%, signal=38%	Gpr137b/Fgfr3/Pik3r1/Gnas
TM_pom_BP_GO:0050926	TM_pom	BP	GO:0050926	regulation of positive chemotaxis	5/490	25/15707	0.0009169	0.0056481	0.00372218	20315/18654/18213/22341/18205	5	5	Active	0.560376	1.24651	0.223122	0.684015	0.657148	51	tags=40%, list=10%, signal=36%	Cxcl12/Pgf
TM_pom_BP_GO:0060343	TM_pom	BP	GO:0060343	trabecula formation	5/490	25/15707	0.0009169	0.0056481	0.00372218	12643/14119/20377/12842/19662	5	5	Active	0.507479	1.12885	0.331576	0.722064	0.693703	103	tags=60%, list=20%, signal=48%	Chad/Rbp4/Fbn2
TM_pom_BP_GO:0090025	TM_pom	BP	GO:0090025	regulation of monocyte chemotaxis	5/490	25/15707	0.0009169	0.0056481	0.00372218	19252/20315/17965/15945/18133	5	5	Active	0.449837	1.00063	0.470533	0.796468	0.765184	49	tags=40%, list=10%, signal=37%	Cxcl10/Cxcl12
TM_pom_BP_GO:0050886	TM_pom	BP	GO:0050886	endocrine process	9/490	81/15707	0.000924903	0.0056882	0.0037486	78896/14683/12394/13616/14609/14062/21386/11826/230857	9	9	Active	0.454349	1.22854	0.240541	0.695224	0.667917	2	tags=11%, list=0%, signal=11%	Ecrg4
TM_pom_BP_GO:0098742	TM_pom	BP	GO:0098742	cell-cell adhesion via plasma-membrane adhesion molecules	15/490	190/15707	0.000925956	0.0056882	0.0037486	13723/545370/80883/13602/19266/380732/21808/16852/329628/23888/224024/23965/16600/279653/50791	15	15	Active	0.281503	0.89175	0.594385	0.851199	0.817765	12	tags=13%, list=2%, signal=13%	Emb/Hmcn1
TM_pom_BP_GO:0010712	TM_pom	BP	GO:0010712	regulation of collagen metabolic process	7/490	51/15707	0.000971624	0.00586389	0.00386438	14219/21809/14184/12159/22417/14062/22352	7	7	Active	0.448085	1.11608	0.337158	0.724814	0.696344	89	tags=43%, list=17%, signal=36%	Ccn2/Tgfb3/Fgfr3
TM_pom_BP_GO:0010771	TM_pom	BP	GO:0010771	negative regulation of cell morphogenesis involved in differentiation	4/490	15/15707	0.00097102	0.00586389	0.00386438	14114/50706/107351/24066	4	4	Active	0.383858	0.794547	0.721128	0.912834	0.876979	317	tags=100%, list=62%, signal=38%	Fbln1/Postn/Kank1/Spry4
TM_pom_BP_GO:0048715	TM_pom	BP	GO:0048715	negative regulation of oligodendrocyte differentiation	4/490	15/15707	0.00097102	0.00586389	0.00386438	15902/12159/103743/15205	4	4	Active	0.354072	0.732893	0.787012	0.938765	0.901892	59	tags=25%, list=12%, signal=22%	Id2
TM_pom_BP_GO:0050930	TM_pom	BP	GO:0050930	induction of positive chemotaxis	4/490	15/15707	0.00097102	0.00586389	0.00386438	20315/18654/22341/18205	4	4	Active	0.641165	1.32715	0.152404	0.659727	0.633814	51	tags=50%, list=10%, signal=45%	Cxcl12/Pgf
TM_pom_BP_GO:0055012	TM_pom	BP	GO:0055012	ventricular cardiac muscle cell differentiation	4/490	15/15707	0.00097102	0.00586389	0.00386438	77579/18741/17260/218772	4	4	Active	0.208661	0.431907	0.992995	1	0.960721	406	tags=100%, list=79%, signal=21%	Myh10/Pitx2/Rarb/Mef2c
TM_pom_BP_GO:0071696	TM_pom	BP	GO:0071696	ectodermal placode development	4/490	15/15707	0.00097102	0.00586389	0.00386438	14683/16974/21385/21386	4	4	Active	0.324789	0.67228	0.842484	0.956503	0.918933	124	tags=50%, list=24%, signal=38%	Lrp6/Gnas
TM_pom_BP_GO:0090083	TM_pom	BP	GO:0090083	regulation of inclusion body assembly	4/490	15/15707	0.00097102	0.00586389	0.00386438	12759/67847/20660/11816	4	4	Active	0.639143	1.32296	0.156948	0.659727	0.633814	5	tags=25%, list=1%, signal=25%	Clu
TM_pom_BP_GO:0043281	TM_pom	BP	GO:0043281	regulation of cysteine-type endopeptidase activity involved in apoptotic process	15/490	191/15707	0.000976843	0.00587949	0.00387467	16000/14219/21825/20319/12955/14456/13479/15234/16007/59009/14062/16600/11826/50768/15370	15	15	Active	0.387774	1.22839	0.234299	0.694028	0.666768	54	tags=33%, list=11%, signal=31%	Sfrp2/Ccn2/Thbs1/Ccn1/Gas6
TM_pom_BP_GO:0051495	TM_pom	BP	GO:0051495	positive regulation of cytoskeleton organization	16/490	211/15707	0.000976191	0.00587949	0.00387467	14219/21809/17926/11867/211401/15894/22417/14745/218952/18008/22411/22323/18213/18205/58804/260409	16	16	Active	0.408782	1.3237	0.158736	0.659727	0.633814	93	tags=31%, list=18%, signal=26%	Myoc/Ccn2/Tgfb3/Arpc1b/Icam1
TM_pom_BP_GO:0032872	TM_pom	BP	GO:0032872	regulation of stress-activated MAPK cascade	14/490	172/15707	0.00101008	0.0060632	0.00399573	14219/19252/70097/20319/15234/21808/268373/13649/13197/22418/59009/17873/16001/20377	14	14	Active	0.33908	1.05407	0.402408	0.757636	0.727877	15	tags=14%, list=3%, signal=14%	Sfrp2/Ccn2
TM_pom_BP_GO:0070374	TM_pom	BP	GO:0070374	positive regulation of ERK1 and ERK2 cascade	15/490	192/15707	0.00103007	0.00617491	0.00406936	14219/12654/11600/11475/18595/14456/14184/20315/13649/15894/12159/218952/14062/83397/11816	15	15	Active	0.524695	1.66213	0.0287925	0.552413	0.530715	93	tags=47%, list=18%, signal=39%	Chil1/Ccn2/Angpt1/Cxcl12/Gas6/Fgfr3/Icam1
TM_pom_BP_GO:0051090	TM_pom	BP	GO:0051090	regulation of DNA-binding transcription factor activity	24/490	385/15707	0.00105654	0.00630815	0.00415716	56312/108116/12759/67916/19223/15902/17470/14456/14362/268373/15894/16974/22418/20893/208727/16600/15205/11835/16001/21416/18035/12289/21833/15903	24	24	Active	0.296291	1.08055	0.365269	0.73859	0.70958	93	tags=33%, list=18%, signal=29%	Clu/Ptgis/Plpp3/Gas6/Id2/Cd200/Fzd1/Icam1
TM_pom_BP_GO:0021675	TM_pom	BP	GO:0021675	nerve development	8/490	67/15707	0.00109869	0.00652492	0.00430001	20720/14184/18187/15205/14042/18205/240725/16658	8	8	Active	0.448413	1.16806	0.290055	0.7059	0.678173	286	tags=100%, list=56%, signal=45%	Serpine2/Fgfr3/Nrp2/Mafb/Ntf3/Ext1/Hes1/Sulf1
TM_pom_BP_GO:0045600	TM_pom	BP	GO:0045600	positive regulation of fat cell differentiation	8/490	67/15707	0.00109869	0.00652492	0.00430001	16000/74186/15902/20319/12608/70717/12192/20377	8	8	Active	0.339956	0.885546	0.599816	0.852402	0.818921	59	tags=38%, list=12%, signal=34%	Sfrp2/Ccdc3/Id2
TM_pom_BP_GO:0003171	TM_pom	BP	GO:0003171	atrioventricular valve development	5/490	26/15707	0.00110642	0.00654474	0.00431308	21808/16007/18741/20564/20677	5	5	Active	0.29583	0.65805	0.860855	0.962643	0.924832	45	tags=20%, list=9%, signal=18%	Ccn1
TM_pom_BP_GO:0045671	TM_pom	BP	GO:0045671	negative regulation of osteoclast differentiation	5/490	26/15707	0.00110642	0.00654474	0.00431308	83924/93694/18708/16658/20377	5	5	Active	0.43471	0.966978	0.50499	0.813937	0.781967	200	tags=80%, list=39%, signal=49%	Gpr137b/Pik3r1/Mafb/Sfrp1
TM_pom_BP_GO:0070633	TM_pom	BP	GO:0070633	transepithelial transport	5/490	26/15707	0.00110642	0.00654474	0.00431308	20496/18671/11465/11461/11826	5	5	Active	0.296768	0.660137	0.858031	0.962643	0.924832	29	tags=20%, list=6%, signal=19%	Slc12a2
TM_pom_BP_GO:0003158	TM_pom	BP	GO:0003158	endothelium development	11/490	118/15707	0.00115426	0.00680071	0.00448176	12741/64103/12822/19684/15894/12159/21872/15945/12819/77446/11852	11	11	Active	0.356593	1.0301	0.427357	0.771581	0.741274	22	tags=18%, list=4%, signal=18%	Tnmd/Cxcl10
TM_pom_BP_GO:0042303	TM_pom	BP	GO:0042303	molting cycle	11/490	118/15707	0.00115426	0.00680071	0.00448176	22409/16011/14683/12394/13167/21808/13649/66042/22418/20682/12043	11	11	Active	0.241659	0.698086	0.822689	0.951224	0.913861	124	tags=45%, list=24%, signal=35%	Igfbp5/Sostdc1/Dbi/Runx1/Gnas
TM_pom_BP_GO:0042633	TM_pom	BP	GO:0042633	hair cycle	11/490	118/15707	0.00115426	0.00680071	0.00448176	22409/16011/14683/12394/13167/21808/13649/66042/22418/20682/12043	11	11	Active	0.241659	0.698086	0.822689	0.951224	0.913861	124	tags=45%, list=24%, signal=35%	Igfbp5/Sostdc1/Dbi/Runx1/Gnas
TM_pom_BP_GO:0070302	TM_pom	BP	GO:0070302	regulation of stress-activated protein kinase signaling cascade	14/490	175/15707	0.00119379	0.00702435	0.00462915	14219/19252/70097/20319/15234/21808/268373/13649/13197/22418/59009/17873/16001/20377	14	14	Active	0.33908	1.05407	0.402408	0.757636	0.727877	15	tags=14%, list=3%, signal=14%	Sfrp2/Ccn2
TM_pom_BP_GO:0007520	TM_pom	BP	GO:0007520	myoblast fusion	6/490	39/15707	0.00121578	0.00709763	0.00467744	20315/15945/66860/18741/18007/17886	6	6	Active	0.544714	1.28906	0.195672	0.670278	0.64395	49	tags=33%, list=10%, signal=31%	Cxcl10/Cxcl12
TM_pom_BP_GO:0050974	TM_pom	BP	GO:0050974	detection of mechanical stimulus involved in sensory perception	6/490	39/15707	0.00121578	0.00709763	0.00467744	20720/16000/20496/12814/20315/667742	6	6	Active	0.479368	1.13442	0.320276	0.719356	0.6911	71	tags=67%, list=14%, signal=58%	Serpine2/Slc12a2/Cxcl12/Col11a1
TM_pom_BP_GO:1901615	TM_pom	BP	GO:1901615	organic hydroxy compound metabolic process	26/490	435/15707	0.00122209	0.00711793	0.00469082	67916/12705/53881/50518/13082/21808/19012/22418/50781/22417/24136/67847/19091/71780/12971/16832/20502/11816/12043/109754/14148/18783/20148/12846/13038/19662	26	26	Active	0.126386	0.472592	0.983902	1	0.960721	70	tags=15%, list=14%, signal=14%	Slc5a3/Plpp3/Cyp26a1/Rbp4
TM_pom_BP_GO:1903428	TM_pom	BP	GO:1903428	positive regulation of reactive oxygen species biosynthetic process	7/490	53/15707	0.00122622	0.00713062	0.00469918	12759/53881/15894/16598/208727/16600/11898	7	7	Active	0.542472	1.35118	0.15248	0.659727	0.633814	93	tags=43%, list=18%, signal=36%	Clu/Slc5a3/Icam1
TM_pom_BP_GO:0001886	TM_pom	BP	GO:0001886	endothelial cell morphogenesis	4/490	16/15707	0.001263	0.00731591	0.00482129	64103/12822/12819/77446	4	4	Active	0.614107	1.27114	0.197652	0.6735	0.647046	9	tags=25%, list=2%, signal=25%	Tnmd
TM_pom_BP_GO:0043271	TM_pom	BP	GO:0043271	negative regulation of ion transport	21/490	323/15707	0.00127053	0.00734997	0.00484374	20720/98660/21825/11600/19735/17470/21808/14783/14758/15894/17999/98496/19091/14062/18133/15205/18007/11816/20377/12043/16592	21	21	Active	0.2662	0.933706	0.545568	0.828638	0.79609	31	tags=14%, list=6%, signal=14%	Serpine2/Thbs1/Angpt1
TM_pom_BP_GO:0033688	TM_pom	BP	GO:0033688	regulation of osteoblast proliferation	5/490	27/15707	0.00132348	0.00759723	0.00500668	16007/23876/16001/20377/12043	5	5	Active	0.483235	1.07492	0.388816	0.752061	0.722521	267	tags=100%, list=52%, signal=48%	Ccn1/Fbln5/Sfrp1/Igf1r/Bcl2
TM_pom_BP_GO:0061036	TM_pom	BP	GO:0061036	positive regulation of cartilage development	5/490	27/15707	0.00132348	0.00759723	0.00500668	17242/16007/22418/12159/20682	5	5	Active	0.517205	1.15048	0.307287	0.713554	0.685527	45	tags=40%, list=9%, signal=37%	Mdk/Ccn1
TM_pom_BP_GO:0001885	TM_pom	BP	GO:0001885	endothelial cell development	8/490	69/15707	0.0013342	0.0076196	0.00502143	12741/64103/12822/19684/15894/21872/12819/77446	8	8	Active	0.293693	0.765037	0.748066	0.919555	0.883436	9	tags=12%, list=2%, signal=12%	Tnmd
TM_pom_BP_GO:0030041	TM_pom	BP	GO:0030041	actin filament polymerization	14/490	177/15707	0.00133121	0.0076196	0.00502143	19240/13717/225115/11867/211401/19684/15894/12332/19241/20742/22323/107351/58804/260409	14	14	Active	0.248426	0.772259	0.731129	0.914611	0.878686	93	tags=29%, list=18%, signal=24%	Eln/Svil/Arpc1b/Icam1
TM_pom_BP_GO:0070613	TM_pom	BP	GO:0070613	regulation of protein processing	7/490	54/15707	0.00137169	0.00782371	0.00515594	20720/21825/233744/21922/14451/103743/17886	7	7	Active	0.482604	1.20206	0.262398	0.699805	0.672318	18	tags=29%, list=4%, signal=28%	Serpine2/Thbs1
TM_pom_BP_GO:0022408	TM_pom	BP	GO:0022408	negative regulation of cell-cell adhesion	14/490	178/15707	0.00140472	0.00798155	0.00525996	20720/17242/12394/20315/242202/19684/12159/12608/19091/16362/18708/16600/11898/19084	14	14	Active	0.465558	1.44724	0.088785	0.636415	0.611418	139	tags=57%, list=27%, signal=43%	Serpine2/Mdk/Cxcl12/Pde5a/Runx1/Pik3r1/Rdx/Irf1
TM_pom_BP_GO:0046887	TM_pom	BP	GO:0046887	positive regulation of hormone secretion	12/490	140/15707	0.00146009	0.00828562	0.00546034	78896/12394/13616/20750/13649/14609/20666/14645/21416/12289/20677/19662	12	12	Active	0.39119	1.1634	0.293367	0.7059	0.678173	2	tags=8%, list=0%, signal=8%	Ecrg4
TM_pom_BP_GO:0007422	TM_pom	BP	GO:0007422	peripheral nervous system development	8/490	70/15707	0.00146612	0.00830924	0.00547591	18212/53881/17926/14009/16779/17988/18213/18205	8	8	Active	0.45727	1.19114	0.268508	0.700001	0.672506	40	tags=25%, list=8%, signal=23%	Myoc/Slc5a3
TM_pom_BP_GO:0002573	TM_pom	BP	GO:0002573	myeloid leukocyte differentiation	15/490	199/15707	0.00147572	0.00835303	0.00550477	14734/83924/14683/15902/12394/14184/17311/12159/12608/93694/18708/17260/12192/16658/20377	15	15	Active	0.384669	1.21856	0.244556	0.698266	0.670839	124	tags=47%, list=24%, signal=36%	Gpc3/Gpr137b/Id2/Fgfr3/Runx1/Pik3r1/Gnas
TM_pom_BP_GO:0046580	TM_pom	BP	GO:0046580	negative regulation of Ras protein signal transduction	7/490	55/15707	0.00153029	0.00862912	0.00568672	17926/21808/107351/77446/24066/24063/50768	7	7	Active	0.503499	1.2541	0.222798	0.684015	0.657148	4	tags=14%, list=1%, signal=14%	Myoc
TM_pom_BP_GO:0051494	TM_pom	BP	GO:0051494	negative regulation of cytoskeleton organization	13/490	160/15707	0.00153541	0.00864708	0.00569855	19240/225115/17926/19684/12332/21872/20393/19241/18708/20742/107351/11856/50768	13	13	Active	0.286385	0.872322	0.611631	0.854458	0.820896	145	tags=38%, list=28%, signal=28%	Myoc/Svil/Pik3r1/Rdx/Sgk1
TM_pom_BP_GO:0010667	TM_pom	BP	GO:0010667	negative regulation of cardiac muscle cell apoptotic process	5/490	28/15707	0.0015704	0.00877771	0.00578464	56312/17242/20319/15481/12043	5	5	Active	0.480944	1.06982	0.39277	0.753036	0.723458	36	tags=40%, list=7%, signal=38%	Sfrp2/Mdk
TM_pom_BP_GO:0035115	TM_pom	BP	GO:0035115	embryonic forelimb morphogenesis	5/490	28/15707	0.0015704	0.00877771	0.00578464	16974/53614/21386/17701/12904	5	5	Active	0.33925	0.754637	0.75579	0.922325	0.886097	340	tags=100%, list=66%, signal=34%	Lrp6/Reck/Msx1/Crabp2/Tbx3
TM_pom_BP_GO:0071384	TM_pom	BP	GO:0071384	cellular response to corticosteroid stimulus	6/490	41/15707	0.00158978	0.00885282	0.00583413	12193/12159/20393/74747/12192/11826	6	6	Active	0.322134	0.76233	0.743705	0.919036	0.882938	349	tags=100%, list=68%, signal=32%	Zfp36l2/Sgk1/Ddit4/Aqp1/Zfp36l1/Bmp4
TM_pom_BP_GO:0007614	TM_pom	BP	GO:0007614	short-term memory	4/490	17/15707	0.00161123	0.00893885	0.00589083	20317/17242/242202/12846	4	4	Active	0.729407	1.5098	0.0586899	0.596096	0.572682	88	tags=75%, list=17%, signal=63%	Serpinf1/Mdk/Pde5a
TM_pom_BP_GO:0014855	TM_pom	BP	GO:0014855	striated muscle cell proliferation	8/490	71/15707	0.00160818	0.00893885	0.00589083	11600/21808/14609/21385/17260/17967/19084/19662	8	8	Active	0.267965	0.69802	0.823941	0.951908	0.914518	70	tags=25%, list=14%, signal=22%	Angpt1/Rbp4
TM_pom_BP_GO:0030833	TM_pom	BP	GO:0030833	regulation of actin filament polymerization	13/490	161/15707	0.0016241	0.00899905	0.0059305	19240/13717/225115/11867/19684/15894/12332/19241/20742/22323/107351/58804/260409	13	13	Active	0.283604	0.863853	0.620454	0.854639	0.82107	93	tags=31%, list=18%, signal=26%	Eln/Svil/Arpc1b/Icam1
TM_pom_BP_GO:0045664	TM_pom	BP	GO:0045664	regulation of neuron differentiation	15/490	201/15707	0.00162933	0.00901683	0.00594222	21413/15902/20319/21844/20315/17965/12159/20666/20682/15205/17260/21406/18205/20377/12043	15	15	Active	0.291371	0.92301	0.556415	0.830258	0.797647	59	tags=20%, list=12%, signal=18%	Sfrp2/Cxcl12/Id2
TM_pom_BP_GO:0021953	TM_pom	BP	GO:0021953	central nervous system neuron differentiation	14/490	181/15707	0.00164592	0.0090974	0.00599531	18212/18032/20319/22187/68169/13175/22418/16911/24136/18187/20266/15205/20377/20677	14	14	Active	0.175916	0.546854	0.949676	0.997559	0.958377	13	tags=7%, list=3%, signal=7%	Sfrp2
TM_pom_BP_GO:0050878	TM_pom	BP	GO:0050878	regulation of body fluid levels	19/490	286/15707	0.00166276	0.00917909	0.00604915	20720/21825/18595/14683/14456/268373/12845/14114/13649/14609/12490/19091/21824/14062/77446/14042/11816/11826/18783	19	19	Active	0.3552	1.2104	0.231742	0.691798	0.664625	66	tags=26%, list=13%, signal=24%	Serpine2/Thbs1/Comp/Gas6/Fbln1
TM_pom_BP_GO:0051496	TM_pom	BP	GO:0051496	positive regulation of stress fiber assembly	7/490	56/15707	0.00170281	0.00936547	0.00617198	14219/21809/17926/22417/14745/218952/22411	7	7	Active	0.636023	1.58419	0.0405255	0.552413	0.530715	46	tags=43%, list=9%, signal=40%	Myoc/Ccn2/Tgfb3
TM_pom_BP_GO:0072678	TM_pom	BP	GO:0072678	T cell migration	7/490	56/15707	0.00170281	0.00936547	0.00617198	20496/13601/17470/20315/15894/22418/15945	7	7	Active	0.579829	1.44423	0.0956699	0.638055	0.612993	93	tags=71%, list=18%, signal=59%	Cxcl10/Slc12a2/Cxcl12/Cd200/Icam1
TM_pom_BP_GO:1901654	TM_pom	BP	GO:1901654	response to ketone	10/490	106/15707	0.00174613	0.00956834	0.00630567	21809/14683/21808/20750/12159/20393/11835/74747/11826/14148	10	10	Active	0.210146	0.58719	0.919628	0.989433	0.95057	148	tags=40%, list=29%, signal=29%	Tgfb3/Gnas/Sgk1/Spp1
TM_pom_BP_GO:0001937	TM_pom	BP	GO:0001937	negative regulation of endothelial cell proliferation	6/490	42/15707	0.00180671	0.00985194	0.00649257	21825/64103/14609/17260/11816/240725	6	6	Active	0.639639	1.5137	0.066219	0.604834	0.581077	18	tags=33%, list=4%, signal=33%	Tnmd/Thbs1
TM_pom_BP_GO:0002028	TM_pom	BP	GO:0002028	regulation of sodium ion transport	9/490	89/15707	0.00181048	0.00986048	0.0064982	20720/98660/14683/17999/20393/14825/59095/20266/13400	9	9	Active	0.285372	0.771632	0.735515	0.916113	0.880129	6	tags=11%, list=1%, signal=11%	Serpine2
TM_pom_BP_GO:0110148	TM_pom	BP	GO:0110148	biomineralization	33/490	144/15707	1.03e-19	9.23e-17	6.08e-17	16000/19242/14734/17313/22420/13601/14456/14119/14184/211401/12845/20750/16007/14758/21922/14609/67972/12159/12608/22417/16998/27047/30963/16948/22411/20682/17260/76566/21416/70370/100038882/12843/12842	33	33	Suppressed	-0.34839	-1.47559	0.0613684	0.601381	0.577759	111	tags=39%, list=22%, signal=33%	Atp2b1/Mef2c/Col1a2/Mtss1/Gpm6b/Wnt4/Cebpb/Col1a1/Ecm1/Wnt6/Clec3b/Igf1/Ptn
TM_pom_BP_GO:0031214	TM_pom	BP	GO:0031214	biomineral tissue development	32/490	143/15707	8.07e-19	6.01e-16	3.96e-16	16000/19242/14734/17313/22420/13601/14456/14119/14184/211401/12845/20750/16007/14758/21922/14609/67972/12159/12608/22417/16998/27047/30963/16948/22411/20682/17260/76566/21416/100038882/12843/12842	32	32	Suppressed	-0.35515	-1.48958	0.0557769	0.581728	0.558879	111	tags=41%, list=22%, signal=34%	Atp2b1/Mef2c/Col1a2/Mtss1/Gpm6b/Wnt4/Cebpb/Col1a1/Ecm1/Wnt6/Clec3b/Igf1/Ptn
TM_pom_BP_GO:0030282	TM_pom	BP	GO:0030282	bone mineralization	26/490	112/15707	6.13e-16	2.28e-13	1.5e-13	16000/19242/14734/17313/13601/14119/14184/211401/12845/16007/14758/21922/14609/67972/12159/22417/16998/27047/16948/22411/20682/17260/76566/21416/100038882/12843	26	26	Suppressed	-0.339511	-1.3411	0.131561	0.659727	0.633814	111	tags=38%, list=22%, signal=32%	Atp2b1/Mef2c/Col1a2/Mtss1/Gpm6b/Wnt4/Ecm1/Clec3b/Igf1/Ptn
TM_pom_BP_GO:0060485	TM_pom	BP	GO:0060485	mesenchyme development	39/490	267/15707	6.92e-16	2.38e-13	1.57e-13	22409/17242/21825/21809/13082/20319/13616/21844/21808/17285/20348/17311/14609/16974/22418/12159/21385/22417/68010/24136/218952/17999/18187/20666/22411/18741/20682/18569/15205/17260/76566/21416/17701/14042/12192/24063/20377/12043/12842	39	39	Suppressed	-0.176846	-0.781034	0.780144	0.93365	0.896977	176	tags=49%, list=34%, signal=35%	Zfp36l1/Spry1/Bmp4/Wnt11/Tbx2/Fermt2/Meox1/Gja1/Zeb2/Mef2c/Kitl/Sema3c/Tgfb2/Wnt5a/Wnt4/Bambi/Col1a1/Edn3/Wnt10a
TM_pom_BP_GO:0048762	TM_pom	BP	GO:0048762	mesenchymal cell differentiation	34/490	221/15707	1.11e-14	2.92e-12	1.93e-12	22409/17242/21809/13082/20319/13616/21844/21808/20348/17311/14609/16974/22418/12159/22417/68010/24136/218952/18187/20666/22411/18741/20682/18569/15205/17260/76566/21416/17701/14042/24063/20377/12043/12842	34	34	Suppressed	-0.208508	-0.889697	0.620104	0.854639	0.82107	136	tags=38%, list=27%, signal=30%	Fermt2/Gja1/Zeb2/Mef2c/Kitl/Sema3c/Tgfb2/Wnt5a/Wnt4/Bambi/Col1a1/Edn3/Wnt10a
TM_pom_BP_GO:0110149	TM_pom	BP	GO:0110149	regulation of biomineralization	22/490	88/15707	2.09e-14	5.19e-12	3.42e-12	19242/17313/22420/13601/14456/14119/14184/12845/16007/14758/14609/67972/12159/12608/22417/16998/27047/20682/17260/76566/70370/100038882	22	22	Suppressed	-0.297125	-1.12153	0.318213	0.718583	0.690359	78	tags=36%, list=15%, signal=32%	Atp2b1/Mef2c/Gpm6b/Wnt4/Cebpb/Ecm1/Wnt6/Ptn
TM_pom_BP_GO:0030278	TM_pom	BP	GO:0030278	regulation of ossification	25/490	123/15707	6e-14	1.26e-11	8.33e-12	19242/17313/17242/13601/14119/14184/12845/16007/14758/14609/16974/67972/22418/12159/22417/16998/27047/20666/20682/17260/76566/20377/12043/20148/100038882	25	25	Suppressed	-0.210138	-0.819337	0.713422	0.910145	0.874396	111	tags=28%, list=22%, signal=23%	Atp2b1/Mef2c/Wnt5a/Gpm6b/Wnt4/Ecm1/Ptn
TM_pom_BP_GO:2000146	TM_pom	BP	GO:2000146	negative regulation of cell motility	37/490	276/15707	6.23e-14	1.26e-11	8.33e-12	19242/12741/20317/16011/13179/21825/15116/19252/20319/17470/13479/20315/17965/14114/14609/13197/22417/13134/12512/106014/19091/53614/21857/16600/12385/22411/18133/17260/107351/11852/11816/56177/240725/50791/50768/20377/12043	37	37	Suppressed	-0.269908	-1.17401	0.254808	0.69835	0.67092	72	tags=24%, list=14%, signal=23%	Wnt4/Gadd45a/Dusp1/Dcn/Nbl1/Dpep1/Has1/Cldn5/Ptn
TM_pom_BP_GO:0040013	TM_pom	BP	GO:0040013	negative regulation of locomotion	39/490	308/15707	8.39e-14	1.62e-11	1.07e-11	19242/12741/20317/16011/13179/21825/15116/19252/20319/17470/13479/20315/17965/14114/20348/14609/13197/22418/22417/13134/12512/106014/19091/53614/21857/16600/12385/22411/18133/17260/107351/11852/11816/56177/240725/50791/50768/20377/12043	39	39	Suppressed	-0.268038	-1.18378	0.240431	0.695224	0.667917	97	tags=31%, list=19%, signal=27%	Tafa5/Sema3c/Wnt5a/Wnt4/Gadd45a/Dusp1/Dcn/Nbl1/Dpep1/Has1/Cldn5/Ptn
TM_pom_BP_GO:0060537	TM_pom	BP	GO:0060537	muscle tissue development	46/490	418/15707	8.71e-14	1.62e-11	1.07e-11	16000/56312/16011/13717/11600/225115/18595/19735/15902/107589/12814/16002/17904/21808/13653/13642/20348/17263/14609/16974/22418/77579/12159/21385/19091/208727/22634/20666/21386/16948/18741/20682/17260/21416/77446/17967/218772/13008/12043/53620/19084/99929/13007/20482/15370/19662	46	46	Suppressed	-0.167312	-0.769729	0.801597	0.947108	0.909907	20	tags=22%, list=4%, signal=23%	Mef2c/Csrp1/Csrp2/Sema3c/Tgfb2/Wnt5a/Rgs2/Pdgfra/Nupr1/Igf1
TM_pom_BP_GO:0048608	TM_pom	BP	GO:0048608	reproductive structure development	44/490	389/15707	1.18e-13	2.03e-11	1.34e-11	20720/16000/19242/56312/20317/11600/19223/12705/18595/53381/72780/12394/20319/22187/16002/18671/16157/21808/16007/14238/17311/13649/15894/14609/16974/22418/12159/12608/22417/21386/20682/15205/11835/16001/21416/268903/240725/12192/20377/12043/18783/99929/67971/19662	44	44	Suppressed	-0.251256	-1.14558	0.273639	0.702419	0.674829	86	tags=25%, list=17%, signal=23%	Tgfb2/Wnt5a/Wnt4/Tppp3/Cebpb/Abcb1a/Cited1/Pdgfra/Nupr1/Igf1/Ptn
TM_pom_BP_GO:0061458	TM_pom	BP	GO:0061458	reproductive system development	44/490	392/15707	1.55e-13	2.51e-11	1.66e-11	20720/16000/19242/56312/20317/11600/19223/12705/18595/53381/72780/12394/20319/22187/16002/18671/16157/21808/16007/14238/17311/13649/15894/14609/16974/22418/12159/12608/22417/21386/20682/15205/11835/16001/21416/268903/240725/12192/20377/12043/18783/99929/67971/19662	44	44	Suppressed	-0.251256	-1.14558	0.273639	0.702419	0.674829	86	tags=25%, list=17%, signal=23%	Tgfb2/Wnt5a/Wnt4/Tppp3/Cebpb/Abcb1a/Cited1/Pdgfra/Nupr1/Igf1/Ptn
TM_pom_BP_GO:0051271	TM_pom	BP	GO:0051271	negative regulation of cellular component movement	37/490	285/15707	1.71e-13	2.6e-11	1.72e-11	19242/12741/20317/16011/13179/21825/15116/19252/20319/17470/13479/20315/17965/14114/14609/13197/22417/13134/12512/106014/19091/53614/21857/16600/12385/22411/18133/17260/107351/11852/11816/56177/240725/50791/50768/20377/12043	37	37	Suppressed	-0.269908	-1.17401	0.254808	0.69835	0.67092	72	tags=24%, list=14%, signal=23%	Wnt4/Gadd45a/Dusp1/Dcn/Nbl1/Dpep1/Has1/Cldn5/Ptn
TM_pom_BP_GO:0070167	TM_pom	BP	GO:0070167	regulation of biomineral tissue development	21/490	87/15707	1.75e-13	2.6e-11	1.72e-11	19242/17313/22420/13601/14456/14119/14184/12845/16007/14758/14609/67972/12159/12608/22417/16998/27047/20682/17260/76566/100038882	21	21	Suppressed	-0.3065	-1.13874	0.297149	0.710117	0.682224	111	tags=38%, list=22%, signal=31%	Atp2b1/Mef2c/Gpm6b/Wnt4/Cebpb/Ecm1/Wnt6/Ptn
TM_pom_BP_GO:0030336	TM_pom	BP	GO:0030336	negative regulation of cell migration	35/490	263/15707	3.79e-13	5.29e-11	3.48e-11	19242/12741/20317/16011/13179/21825/15116/19252/20319/17470/13479/20315/17965/14609/13197/22417/13134/12512/106014/19091/53614/21857/16600/22411/18133/17260/107351/11852/11816/56177/240725/50791/50768/20377/12043	35	35	Suppressed	-0.289306	-1.23954	0.186135	0.661916	0.635917	72	tags=26%, list=14%, signal=24%	Wnt4/Gadd45a/Dusp1/Dcn/Nbl1/Dpep1/Has1/Cldn5/Ptn
TM_pom_BP_GO:0001667	TM_pom	BP	GO:0001667	ameboidal-type cell migration	43/490	411/15707	3.26e-12	3.64e-10	2.4e-10	16000/18606/20317/13179/21825/11600/67916/15116/11475/70097/13616/16002/20315/21808/13642/20348/17311/14609/16974/13197/22418/12159/24136/12512/18187/21857/16600/22411/18741/20682/14645/18133/17260/83397/107351/11852/11816/22341/17886/11826/319565/15370/68792	43	43	Suppressed	-0.269545	-1.22042	0.201103	0.6735	0.647046	170	tags=49%, list=33%, signal=36%	Cd63/Bmp4/Wnt11/Akap12/Efnb2/Rhob/Klf4/Gja1/Zeb2/Mef2c/Kitl/Sema3c/Tgfb2/Wnt5a/Sash1/Gadd45a/Dcn/Edn3/Has1/Igf1/Enpp2
TM_pom_BP_GO:0001655	TM_pom	BP	GO:0001655	urogenital system development	38/490	335/15707	5.52e-12	5.73e-10	3.78e-10	16000/271127/14734/20317/11600/22420/12705/18595/15902/211401/21808/13653/20750/13642/18654/329628/22418/12159/22417/16779/22411/20682/15205/11835/17260/16001/14042/218772/240725/11826/24063/20377/12043/20677/99929/18073/15903/19662	38	38	Suppressed	-0.228275	-0.999794	0.457791	0.791189	0.760112	87	tags=24%, list=17%, signal=21%	Mtss1/Tgfb2/Wnt5a/Wnt4/Adamts16/Cited1/Wnt6/Pdgfra/Igf1
TM_pom_BP_GO:0003013	TM_pom	BP	GO:0003013	circulatory system process	45/490	457/15707	8.12e-12	7.88e-10	5.2e-10	98660/12741/271127/14219/12293/11600/11475/59027/19735/14683/15902/13616/14456/18671/21808/242202/12845/13649/15894/14609/67972/16598/12490/21872/218952/19091/208727/14062/20266/18708/50706/11835/83397/64817/77446/20502/12289/14042/11816/22341/21833/13400/230857/16592/12843	45	45	Suppressed	-0.279555	-1.28138	0.140053	0.659727	0.633814	49	tags=20%, list=10%, signal=20%	Abcb1a/Rgs2/Adamts16/Edn3/Cd34/Nampt/Cacna2d1/Cldn5/Atp1a2
TM_pom_BP_GO:0030500	TM_pom	BP	GO:0030500	regulation of bone mineralization	18/490	75/15707	1.06e-11	1.01e-09	6.65e-10	19242/17313/13601/14119/14184/12845/16007/14758/14609/67972/12159/22417/16998/27047/20682/17260/76566/100038882	18	18	Suppressed	-0.275706	-0.977405	0.481113	0.802624	0.771098	128	tags=39%, list=25%, signal=30%	Gja1/Atp2b1/Mef2c/Gpm6b/Wnt4/Ecm1/Ptn
TM_pom_BP_GO:0048732	TM_pom	BP	GO:0048732	gland development	40/490	385/15707	2.4e-11	1.95e-09	1.29e-09	20720/16000/19242/22409/20317/17242/16011/20496/18595/21809/15902/12394/16002/15234/20348/17263/13649/14609/21817/16974/66042/22418/12159/21385/12608/22417/16911/21386/18741/20682/15205/11835/16001/21416/17701/21833/240725/16658/20377/12043	40	40	Suppressed	-0.261775	-1.16382	0.262213	0.699805	0.672318	20	tags=10%, list=4%, signal=10%	Pdgfra/Wnt10a/Igf1/Ptn
TM_pom_BP_GO:0042692	TM_pom	BP	GO:0042692	muscle cell differentiation	39/490	370/15707	2.78e-11	2.22e-09	1.46e-09	16000/16011/18595/19735/15902/16002/20315/12845/13642/77579/12159/21385/22417/11465/15945/30963/19091/66860/208727/19241/21386/16948/18741/20682/18569/18133/15205/17260/18007/17701/18205/218772/21833/17886/13400/13008/12043/19084/13007	39	39	Suppressed	-0.13943	-0.615788	0.930861	0.993563	0.954538	20	tags=8%, list=4%, signal=8%	Rgs2/Pdgfra/Igf1
TM_pom_BP_GO:0055123	TM_pom	BP	GO:0055123	digestive system development	21/490	114/15707	4.55e-11	3.56e-09	2.35e-09	16000/18595/15902/20319/14184/16002/14238/13649/329628/22418/12159/21385/20666/18741/15205/16001/21416/14042/218772/20377/12043	21	21	Suppressed	-0.254003	-0.943695	0.52862	0.822572	0.790263	20	tags=10%, list=4%, signal=10%	Pdgfra/Igf1
TM_pom_BP_GO:0014706	TM_pom	BP	GO:0014706	striated muscle tissue development	40/490	396/15707	5.73e-11	4.34e-09	2.86e-09	16000/56312/13717/11600/225115/18595/19735/15902/12814/16002/17904/21808/13653/13642/20348/17263/14609/16974/22418/77579/12159/21385/19091/208727/22634/20666/21386/16948/18741/17260/21416/77446/17967/218772/12043/53620/19084/20482/15370/19662	40	40	Suppressed	-0.196208	-0.872317	0.660201	0.879592	0.845043	20	tags=10%, list=4%, signal=10%	Rgs2/Pdgfra/Nupr1/Igf1
TM_pom_BP_GO:0022612	TM_pom	BP	GO:0022612	gland morphogenesis	23/490	140/15707	6.17e-11	4.53e-09	2.99e-09	16000/19242/17242/16011/20496/15234/20348/13649/21817/16974/66042/22418/12159/21385/12608/22417/21386/20682/11835/16001/240725/20377/12043	23	23	Suppressed	-0.369448	-1.40614	0.101871	0.645921	0.62055	96	tags=35%, list=19%, signal=30%	Sema3c/Tgm2/Hgf/Wnt5a/Wnt4/Cebpb/Igf1/Ptn
TM_pom_BP_GO:0072001	TM_pom	BP	GO:0072001	renal system development	34/490	298/15707	6.41e-11	4.62e-09	3.04e-09	271127/14734/11600/22420/12705/18595/15902/211401/21808/13653/20750/13642/18654/329628/22418/12159/22417/16779/22411/20682/15205/17260/14042/218772/240725/11826/24063/20377/12043/20677/99929/18073/15903/19662	34	34	Suppressed	-0.17762	-0.757899	0.799198	0.946419	0.909245	87	tags=24%, list=17%, signal=21%	Mtss1/Tgfb2/Wnt5a/Wnt4/Adamts16/Cited1/Wnt6/Pdgfra
TM_pom_BP_GO:0001822	TM_pom	BP	GO:0001822	kidney development	33/490	283/15707	6.9e-11	4.81e-09	3.17e-09	271127/14734/11600/22420/12705/18595/15902/211401/21808/13653/20750/13642/18654/329628/22418/12159/22417/16779/22411/20682/15205/17260/14042/218772/240725/11826/24063/20377/12043/20677/99929/18073/15903	33	33	Suppressed	-0.191134	-0.809539	0.735481	0.916113	0.880129	87	tags=24%, list=17%, signal=22%	Mtss1/Tgfb2/Wnt5a/Wnt4/Adamts16/Cited1/Wnt6/Pdgfra
TM_pom_BP_GO:0007548	TM_pom	BP	GO:0007548	sex differentiation	29/490	226/15707	1.02e-10	6.78e-09	4.47e-09	56312/11600/18595/53381/12394/20319/22187/18671/21808/14238/17311/15894/14609/16974/22418/12159/12608/22417/13134/21386/20682/11835/21416/268903/20377/12043/18783/99929/19662	29	29	Suppressed	-0.183142	-0.747021	0.807145	0.949122	0.911842	86	tags=48%, list=17%, signal=43%	Tbx3/Dach1/Bmp4/Tiparp/Ubb/Gja1/Kitl/Tgfb2/Wnt5a/Wnt4/Cebpb/Abcb1a/Pdgfra/Nupr1
TM_pom_BP_GO:0048659	TM_pom	BP	GO:0048659	smooth muscle cell proliferation	24/490	166/15707	3.65e-10	2.24e-08	1.47e-08	16000/16011/21825/21809/59027/15902/13653/13649/14609/21817/12159/106014/19091/208727/54598/18708/15446/16600/18569/18133/17260/16001/21416/12846	24	24	Suppressed	-0.204624	-0.790328	0.745375	0.919036	0.882938	22	tags=8%, list=4%, signal=8%	Nampt/Igf1
TM_pom_BP_GO:0045137	TM_pom	BP	GO:0045137	development of primary sexual characteristics	25/490	184/15707	6.01e-10	3.4e-08	2.24e-08	56312/11600/18595/53381/12394/20319/22187/18671/21808/17311/15894/14609/22418/12159/12608/22417/13134/20682/11835/268903/20377/12043/18783/99929/19662	25	25	Suppressed	-0.220155	-0.858394	0.66248	0.881853	0.847215	86	tags=52%, list=17%, signal=45%	Dach1/Bmp4/Tiparp/Ubb/Gja1/Kitl/Tgfb2/Wnt5a/Wnt4/Cebpb/Abcb1a/Pdgfra/Nupr1
TM_pom_BP_GO:0008015	TM_pom	BP	GO:0008015	blood circulation	40/490	430/15707	6.85e-10	3.73e-08	2.46e-08	98660/12741/271127/14219/12293/11600/11475/59027/19735/14683/15902/13616/14456/21808/242202/12845/13649/15894/14609/67972/16598/12490/21872/218952/19091/208727/14062/20266/18708/50706/11835/83397/12289/14042/11816/22341/21833/13400/230857/12843	40	40	Suppressed	-0.292637	-1.30103	0.136494	0.659727	0.633814	42	tags=20%, list=8%, signal=20%	Rgs2/Adamts16/Edn3/Cd34/Nampt/Cacna2d1/Cldn5/Atp1a2
TM_pom_BP_GO:0110151	TM_pom	BP	GO:0110151	positive regulation of biomineralization	13/490	46/15707	8.99e-10	4.72e-08	3.11e-08	19242/22420/14119/14184/16007/14758/67972/12159/12608/22417/17260/70370/100038882	13	13	Suppressed	-0.489133	-1.56101	0.0494271	0.567372	0.545086	111	tags=54%, list=22%, signal=43%	Atp2b1/Mef2c/Gpm6b/Wnt4/Cebpb/Wnt6/Ptn
TM_pom_BP_GO:0072006	TM_pom	BP	GO:0072006	nephron development	21/490	134/15707	1.04e-09	5.26e-08	3.46e-08	271127/14734/11600/22420/12705/18595/211401/13653/18654/329628/12159/22417/16779/20682/15205/17260/14042/240725/11826/12043/18073	21	21	Suppressed	-0.250786	-0.931744	0.544584	0.828585	0.796039	36	tags=33%, list=7%, signal=32%	Mef2c/Mtss1/Wnt4/Adamts16/Cited1/Wnt6/Pdgfra
TM_pom_BP_GO:0048660	TM_pom	BP	GO:0048660	regulation of smooth muscle cell proliferation	23/490	161/15707	1.09e-09	5.45e-08	3.59e-08	16000/16011/21825/21809/59027/15902/13653/13649/14609/21817/12159/106014/19091/208727/54598/18708/15446/16600/18569/17260/16001/21416/12846	23	23	Suppressed	-0.210109	-0.799689	0.732271	0.914611	0.878686	22	tags=9%, list=4%, signal=9%	Nampt/Igf1
TM_pom_BP_GO:0001656	TM_pom	BP	GO:0001656	metanephros development	16/490	77/15707	1.49e-09	7.33e-08	4.83e-08	14734/12705/18595/15902/211401/13653/329628/12159/22417/16779/20682/15205/11826/24063/12043/15903	16	16	Suppressed	-0.197843	-0.67403	0.853372	0.961747	0.923971	87	tags=25%, list=17%, signal=21%	Mtss1/Wnt4/Cited1/Pdgfra
TM_pom_BP_GO:0030199	TM_pom	BP	GO:0030199	collagen fibril organization	14/490	57/15707	1.55e-09	7.51e-08	4.95e-08	56429/16949/20319/12814/21808/12845/11568/12832/16948/17022/14042/12831/12843/12842	14	14	Suppressed	-0.281084	-0.915407	0.566118	0.831376	0.798721	122	tags=50%, list=24%, signal=39%	Lum/Col1a2/Tgfb2/Col5a1/Col1a1/Col5a2/Dpt
TM_pom_BP_GO:0001654	TM_pom	BP	GO:0001654	eye development	36/490	372/15707	1.75e-09	8.41e-08	5.54e-08	19242/64075/18212/18595/12837/12955/329941/14184/21808/17150/14238/13649/14609/16974/14451/77579/12159/21385/654812/24136/12832/23965/16779/20666/16600/18741/20682/22352/18213/218772/11826/24063/12043/12831/20482/19662	36	36	Suppressed	-0.309488	-1.33291	0.12156	0.659727	0.633814	24	tags=14%, list=5%, signal=14%	Col5a2/Pdgfra/Ntrk2/Angptl7/Ptn
TM_pom_BP_GO:0008406	TM_pom	BP	GO:0008406	gonad development	24/490	180/15707	1.96e-09	9.12e-08	6.01e-08	56312/11600/18595/53381/12394/20319/22187/18671/21808/17311/15894/14609/22418/12159/12608/22417/20682/11835/268903/20377/12043/18783/99929/19662	24	24	Suppressed	-0.229421	-0.886103	0.613321	0.854458	0.820896	86	tags=29%, list=17%, signal=25%	Tgfb2/Wnt5a/Wnt4/Cebpb/Abcb1a/Pdgfra/Nupr1
TM_pom_BP_GO:0051146	TM_pom	BP	GO:0051146	striated muscle cell differentiation	31/490	288/15707	1.93e-09	9.12e-08	6.01e-08	16000/16011/18595/19735/16002/20315/12845/13642/77579/12159/11465/15945/30963/19091/66860/208727/21386/16948/18741/18133/17260/18007/17701/218772/21833/17886/13400/13008/12043/19084/13007	31	31	Suppressed	-0.178386	-0.740981	0.814928	0.951224	0.913861	42	tags=10%, list=8%, signal=9%	Rgs2/Pdgfra/Igf1
TM_pom_BP_GO:0150063	TM_pom	BP	GO:0150063	visual system development	36/490	375/15707	2.18e-09	9.82e-08	6.47e-08	19242/64075/18212/18595/12837/12955/329941/14184/21808/17150/14238/13649/14609/16974/14451/77579/12159/21385/654812/24136/12832/23965/16779/20666/16600/18741/20682/22352/18213/218772/11826/24063/12043/12831/20482/19662	36	36	Suppressed	-0.309488	-1.33291	0.12156	0.659727	0.633814	24	tags=14%, list=5%, signal=14%	Col5a2/Pdgfra/Ntrk2/Angptl7/Ptn
TM_pom_BP_GO:0048880	TM_pom	BP	GO:0048880	sensory system development	36/490	378/15707	2.7e-09	1.2e-07	7.9e-08	19242/64075/18212/18595/12837/12955/329941/14184/21808/17150/14238/13649/14609/16974/14451/77579/12159/21385/654812/24136/12832/23965/16779/20666/16600/18741/20682/22352/18213/218772/11826/24063/12043/12831/20482/19662	36	36	Suppressed	-0.309488	-1.33291	0.12156	0.659727	0.633814	24	tags=14%, list=5%, signal=14%	Col5a2/Pdgfra/Ntrk2/Angptl7/Ptn
TM_pom_BP_GO:0072073	TM_pom	BP	GO:0072073	kidney epithelium development	20/490	128/15707	2.74e-09	1.2e-07	7.9e-08	271127/14734/22420/12705/211401/13642/18654/329628/12159/22417/16779/20682/15205/17260/14042/218772/11826/24063/20377/12043	20	20	Suppressed	-0.211379	-0.774969	0.760386	0.924958	0.888627	108	tags=75%, list=21%, signal=62%	Lamb2/Ext1/Bcl2/Hes1/Rarb/Aqp1/Spry1/Bmp4/Efnb2/Mef2c/Mtss1/Wnt4/Adamts16/Cited1/Wnt6
TM_pom_BP_GO:0048863	TM_pom	BP	GO:0048863	stem cell differentiation	25/490	198/15707	2.84e-09	1.23e-07	8.13e-08	19242/22409/18595/13082/13616/14362/21808/20348/17311/12193/16974/12159/21385/16998/24136/18187/20666/232345/18741/20682/15205/17260/17701/14042/20377	25	25	Suppressed	-0.461892	-1.80093	0.00744359	0.506547	0.48665	34	tags=40%, list=7%, signal=39%	Zeb2/Mef2c/Kitl/Sema3c/Tgfb2/Edn3/Pdgfra/Wnt10a/A2m/Ptn
TM_pom_BP_GO:0035265	TM_pom	BP	GO:0035265	organ growth	24/490	185/15707	3.43e-09	1.43e-07	9.43e-08	16000/21825/13601/18595/19735/16002/21808/12845/14609/23876/21385/19091/373864/20682/11835/17260/21416/77446/14042/17967/218772/12043/19084/19662	24	24	Suppressed	-0.290415	-1.12168	0.307817	0.713847	0.685808	42	tags=17%, list=8%, signal=16%	Rgs2/Ecm1/Pdgfra/Igf1
TM_pom_BP_GO:0072089	TM_pom	BP	GO:0072089	stem cell proliferation	15/490	72/15707	4.7e-09	1.89e-07	1.25e-07	20319/18671/14114/17311/14609/22418/12159/12490/16998/218952/14825/20666/21386/22341/12192	15	15	Suppressed	-0.280874	-0.937235	0.545782	0.828638	0.79609	176	tags=67%, list=34%, signal=45%	Zfp36l1/Tbx3/Bmp4/Fermt2/Gja1/Kitl/Wnt5a/Cxcl1/Abcb1a/Cd34
TM_pom_BP_GO:1901343	TM_pom	BP	GO:1901343	negative regulation of vasculature development	18/490	107/15707	5.12e-09	2.04e-07	1.35e-07	19242/12741/20317/20496/13179/21825/21413/64103/21808/13197/23876/22417/16598/654812/15945/106014/16600/240725	18	18	Suppressed	-0.366877	-1.30061	0.162859	0.659727	0.633814	97	tags=50%, list=19%, signal=42%	Tafa5/Tcf4/Tgfb2/Wnt4/Gadd45a/Dcn/Cldn5/Angptl7/Ptn
TM_pom_BP_GO:1905330	TM_pom	BP	GO:1905330	regulation of morphogenesis of an epithelium	14/490	63/15707	6.33e-09	2.5e-07	1.65e-07	17242/18595/93960/15234/14609/22418/12159/21385/22417/15945/20682/11835/240725/20377	14	14	Suppressed	-0.252996	-0.823931	0.679207	0.893337	0.858248	165	tags=57%, list=32%, signal=40%	Bmp4/Tbx2/Gja1/Nkd1/Hgf/Wnt5a/Wnt4/Pdgfra
TM_pom_BP_GO:0043405	TM_pom	BP	GO:0043405	regulation of MAP kinase activity	29/490	272/15707	8.04e-09	3.12e-07	2.06e-07	16000/21825/21809/19252/19735/70097/16012/20319/13616/21844/15234/242202/268373/17311/13649/13197/22418/12159/14745/24136/20660/17873/16001/18213/11816/24066/18205/24063/20377	29	29	Suppressed	-0.249686	-1.01844	0.437777	0.777725	0.747177	113	tags=34%, list=22%, signal=28%	Zeb2/Kitl/Hgf/Wnt5a/Sash1/Gadd45a/Dusp1/Rgs2/Edn3/Igf1
TM_pom_BP_GO:0070169	TM_pom	BP	GO:0070169	positive regulation of biomineral tissue development	12/490	45/15707	8.38e-09	3.22e-07	2.13e-07	19242/22420/14119/14184/16007/14758/67972/12159/12608/22417/17260/100038882	12	12	Suppressed	-0.509544	-1.57856	0.0484125	0.567372	0.545086	111	tags=58%, list=22%, signal=47%	Atp2b1/Mef2c/Gpm6b/Wnt4/Cebpb/Wnt6/Ptn
TM_pom_BP_GO:0010001	TM_pom	BP	GO:0010001	glial cell differentiation	26/490	228/15707	1.2e-08	4.59e-07	3.02e-07	20720/16000/18606/19242/12759/17242/67916/18212/17926/18032/15902/14184/13649/16974/12159/16779/20666/103743/17988/20682/15205/21416/22352/18213/18205/20677	26	26	Suppressed	-0.367353	-1.45107	0.0781432	0.621718	0.597298	18	tags=15%, list=4%, signal=16%	Ntrk2/Igf1/Enpp2/Ptn
TM_pom_BP_GO:0014033	TM_pom	BP	GO:0014033	neural crest cell differentiation	16/490	89/15707	1.37e-08	5.17e-07	3.41e-07	22409/13082/13616/20348/17311/16974/12159/24136/18187/20666/18741/20682/15205/17260/14042/20377	16	16	Suppressed	-0.323259	-1.10131	0.337695	0.724814	0.696344	113	tags=38%, list=22%, signal=30%	Zeb2/Mef2c/Kitl/Sema3c/Edn3/Wnt10a
TM_pom_BP_GO:0046660	TM_pom	BP	GO:0046660	female sex differentiation	18/490	114/15707	1.44e-08	5.38e-07	3.54e-07	56312/11600/18595/12394/22187/17311/22418/12159/12608/22417/13134/21386/268903/20377/12043/18783/99929/19662	18	18	Suppressed	-0.334062	-1.18428	0.255372	0.69835	0.67092	174	tags=61%, list=34%, signal=42%	Tbx3/Dach1/Bmp4/Tiparp/Ubb/Kitl/Wnt5a/Wnt4/Cebpb/Pdgfra/Nupr1
TM_pom_BP_GO:0042063	TM_pom	BP	GO:0042063	gliogenesis	31/490	314/15707	1.53e-08	5.63e-07	3.71e-07	20720/16000/18606/19242/12759/17242/16777/67916/18212/17926/18032/15902/13167/21844/14184/21808/13649/16974/12159/16779/20666/103743/17988/20682/15205/21416/22352/18213/18205/20677/319565	31	31	Suppressed	-0.344663	-1.43166	0.0779374	0.621718	0.597298	27	tags=16%, list=5%, signal=16%	Lamb1/Ntrk2/Igf1/Enpp2/Ptn
TM_pom_BP_GO:0045778	TM_pom	BP	GO:0045778	positive regulation of ossification	13/490	57/15707	1.58e-08	5.78e-07	3.81e-07	19242/14119/14184/16007/14758/16974/67972/22418/12159/22417/20666/17260/100038882	13	13	Suppressed	-0.410868	-1.31124	0.16603	0.659727	0.633814	111	tags=46%, list=22%, signal=37%	Atp2b1/Mef2c/Wnt5a/Gpm6b/Wnt4/Ptn
TM_pom_BP_GO:0003018	TM_pom	BP	GO:0003018	vascular process in circulatory system	24/490	200/15707	1.63e-08	5.91e-07	3.9e-07	98660/12741/11600/11475/19735/13616/18671/242202/12845/13649/15894/14609/67972/16598/21872/218952/19091/14062/83397/20502/14042/11816/230857/16592	24	24	Suppressed	-0.297576	-1.14934	0.286078	0.703603	0.675966	49	tags=42%, list=10%, signal=40%	Fabp5/Fermt2/Gja1/Atp2b1/Tjp1/Abcb1a/Rgs2/Edn3/Cldn5/Atp1a2
TM_pom_BP_GO:0032835	TM_pom	BP	GO:0032835	glomerulus development	13/490	58/15707	1.98e-08	7.07e-07	4.66e-07	11600/18595/211401/13653/12159/16779/15205/17260/14042/240725/11826/12043/18073	13	13	Suppressed	-0.218996	-0.698901	0.826331	0.953865	0.916399	249	tags=77%, list=49%, signal=41%	Lamb2/Ext1/Bcl2/Hes1/Sulf1/Aqp1/Bmp4/Mef2c/Mtss1/Pdgfra
TM_pom_BP_GO:0042445	TM_pom	BP	GO:0042445	hormone metabolic process	21/490	159/15707	2.4e-08	8.37e-07	5.51e-07	16000/12876/18595/13082/16002/13653/20750/50781/22417/12971/16001/21416/20502/230857/12904/14148/20148/99929/12846/13038/19662	21	21	Suppressed	-0.269204	-1.00017	0.455644	0.789282	0.75828	20	tags=10%, list=4%, signal=10%	Pdgfra/Igf1
TM_pom_BP_GO:0010631	TM_pom	BP	GO:0010631	epithelial cell migration	29/490	287/15707	2.68e-08	9.29e-07	6.13e-07	16000/18606/20317/13179/21825/11600/67916/70097/16002/21808/13642/13197/22418/12159/24136/12512/16600/20682/14645/18133/17260/107351/11852/11816/22341/17886/11826/15370/68792	29	29	Suppressed	-0.274375	-1.11915	0.312398	0.71705	0.688886	86	tags=48%, list=17%, signal=43%	Cd63/Bmp4/Efnb2/Rhob/Klf4/Zeb2/Mef2c/Tgfb2/Wnt5a/Sash1/Gadd45a/Dcn/Igf1/Enpp2
TM_pom_BP_GO:0030900	TM_pom	BP	GO:0030900	forebrain development	32/490	340/15707	2.8e-08	9.53e-07	6.28e-07	98660/17242/16777/18212/15902/13167/22187/14184/68169/13175/20315/13649/329628/16974/22418/77579/12159/22417/24136/19091/18187/21386/18741/15205/21416/17701/14042/17967/218772/11826/50768/319565	32	32	Suppressed	-0.181643	-0.761851	0.79236	0.941587	0.904603	81	tags=19%, list=16%, signal=17%	Wnt5a/Wnt4/Ndnf/Lamb1/Ntrk2/Atp1a2
TM_pom_BP_GO:0048771	TM_pom	BP	GO:0048771	tissue remodeling	22/490	175/15707	2.77e-08	9.53e-07	6.28e-07	16000/19242/17242/16011/83924/72780/14184/21808/20750/20348/13649/14609/21817/16974/16998/21857/14062/17260/14042/20377/13038/23849	22	22	Suppressed	-0.342575	-1.29309	0.168452	0.659727	0.633814	5	tags=27%, list=1%, signal=28%	Mef2c/Sema3c/Tgm2/Tgfb2/Igf1/Ptn
TM_pom_BP_GO:0090132	TM_pom	BP	GO:0090132	epithelium migration	29/490	289/15707	3.13e-08	1.04e-06	6.88e-07	16000/18606/20317/13179/21825/11600/67916/70097/16002/21808/13642/13197/22418/12159/24136/12512/16600/20682/14645/18133/17260/107351/11852/11816/22341/17886/11826/15370/68792	29	29	Suppressed	-0.274375	-1.11915	0.312398	0.71705	0.688886	86	tags=48%, list=17%, signal=43%	Cd63/Bmp4/Efnb2/Rhob/Klf4/Zeb2/Mef2c/Tgfb2/Wnt5a/Sash1/Gadd45a/Dcn/Igf1/Enpp2
TM_pom_BP_GO:0010817	TM_pom	BP	GO:0010817	regulation of hormone levels	38/490	454/15707	3.32e-08	1.09e-06	7.19e-07	16000/78896/12876/18595/14683/13082/12394/13616/21844/16002/18671/108075/13653/20750/13649/14609/50781/22417/12971/20666/21386/14645/18133/16001/21416/20502/12289/11826/20377/230857/20677/12904/14148/20148/99929/12846/13038/19662	38	38	Suppressed	-0.145598	-0.637688	0.921129	0.990303	0.951405	49	tags=11%, list=10%, signal=10%	Abcb1a/Edn3/Pdgfra/Igf1
TM_pom_BP_GO:0085029	TM_pom	BP	GO:0085029	extracellular matrix assembly	11/490	41/15707	3.3e-08	1.09e-06	7.19e-07	80883/16777/15116/108075/14758/23876/16998/16779/16948/20682/12843	11	11	Suppressed	-0.469492	-1.4105	0.106991	0.650336	0.624792	102	tags=45%, list=20%, signal=37%	Col1a2/Gpm6b/Lamb1/Has1/Ntng1
TM_pom_BP_GO:0090130	TM_pom	BP	GO:0090130	tissue migration	29/490	290/15707	3.38e-08	1.1e-06	7.24e-07	16000/18606/20317/13179/21825/11600/67916/70097/16002/21808/13642/13197/22418/12159/24136/12512/16600/20682/14645/18133/17260/107351/11852/11816/22341/17886/11826/15370/68792	29	29	Suppressed	-0.274375	-1.11915	0.312398	0.71705	0.688886	86	tags=48%, list=17%, signal=43%	Cd63/Bmp4/Efnb2/Rhob/Klf4/Zeb2/Mef2c/Tgfb2/Wnt5a/Sash1/Gadd45a/Dcn/Igf1/Enpp2
TM_pom_BP_GO:2000241	TM_pom	BP	GO:2000241	regulation of reproductive process	20/490	148/15707	3.5e-08	1.12e-06	7.41e-07	16000/56312/20317/53381/50915/12394/18671/242202/14609/22418/12159/22417/208727/21857/20682/11835/16001/17701/240725/20377	20	20	Suppressed	-0.367449	-1.34716	0.131053	0.659727	0.633814	81	tags=30%, list=16%, signal=26%	Wnt5a/Wnt4/Grb14/Abcb1a/Nupr1/Igf1
TM_pom_BP_GO:0060021	TM_pom	BP	GO:0060021	roof of mouth development	16/490	95/15707	3.59e-08	1.14e-06	7.5e-07	18595/21809/14362/21808/14238/16974/14451/22418/21385/20666/21386/22411/17260/17701/20148/99929	16	16	Suppressed	-0.185813	-0.633045	0.88924	0.977824	0.939416	174	tags=50%, list=34%, signal=34%	Tbx3/Wnt11/Tiparp/Tbx2/Mef2c/Tgfb2/Wnt5a/Pdgfra
TM_pom_BP_GO:0072009	TM_pom	BP	GO:0072009	nephron epithelium development	16/490	95/15707	3.59e-08	1.14e-06	7.5e-07	271127/14734/22420/12705/211401/18654/329628/12159/22417/16779/20682/15205/17260/14042/11826/12043	16	16	Suppressed	-0.272035	-0.926795	0.555831	0.830258	0.797647	108	tags=38%, list=21%, signal=31%	Mef2c/Mtss1/Wnt4/Adamts16/Cited1/Wnt6
TM_pom_BP_GO:0043010	TM_pom	BP	GO:0043010	camera-type eye development	31/490	327/15707	3.92e-08	1.22e-06	8.07e-07	19242/18212/18595/12837/12955/329941/14184/21808/14238/13649/14609/16974/14451/77579/12159/21385/654812/24136/23965/16779/20666/16600/18741/20682/22352/18213/218772/11826/24063/20482/19662	31	31	Suppressed	-0.332055	-1.37929	0.103367	0.648799	0.623315	20	tags=13%, list=4%, signal=13%	Pdgfra/Ntrk2/Angptl7/Ptn
TM_pom_BP_GO:1902430	TM_pom	BP	GO:1902430	negative regulation of amyloid-beta formation	8/490	19/15707	4.73e-08	1.44e-06	9.47e-07	16000/12759/18212/233744/104001/20660/11816/56177	8	8	Suppressed	-0.481431	-1.30499	0.186052	0.661916	0.635917	41	tags=38%, list=8%, signal=35%	Spon1/Ntrk2/Igf1
TM_pom_BP_GO:0071900	TM_pom	BP	GO:0071900	regulation of protein serine/threonine kinase activity	35/490	405/15707	5.36e-08	1.61e-06	1.06e-06	16000/21825/21809/19252/19735/70097/16012/20319/13616/21844/15234/242202/268373/17311/13649/16974/13197/22418/12159/14745/24136/218952/11461/20660/17873/16001/12444/77446/18213/11816/24066/18205/24063/20377/19084	35	35	Suppressed	-0.19342	-0.828711	0.709164	0.910087	0.87434	113	tags=34%, list=22%, signal=29%	Fermt2/Actb/Zeb2/Kitl/Hgf/Wnt5a/Sash1/Gadd45a/Dusp1/Rgs2/Edn3/Igf1
TM_pom_BP_GO:0010720	TM_pom	BP	GO:0010720	positive regulation of cell development	31/490	334/15707	6.37e-08	1.88e-06	1.24e-06	20720/16000/18606/19242/12741/20317/17242/18212/17926/19266/15902/12394/21844/18671/20315/242202/13649/12159/24136/218952/20393/20666/15205/22352/18213/11816/22341/18205/12043/12904/20482	31	31	Suppressed	-0.375056	-1.55791	0.0379091	0.552413	0.530715	18	tags=16%, list=4%, signal=17%	Ntrk2/Cldn5/Igf1/Enpp2/Ptn
TM_pom_BP_GO:0008584	TM_pom	BP	GO:0008584	male gonad development	16/490	100/15707	7.59e-08	2.23e-06	1.47e-06	56312/18595/53381/20319/22187/18671/21808/15894/14609/22418/22417/20682/11835/20377/12043/19662	16	16	Suppressed	-0.315649	-1.07538	0.36499	0.73859	0.70958	86	tags=38%, list=17%, signal=32%	Tgfb2/Wnt5a/Wnt4/Abcb1a/Pdgfra/Nupr1
TM_pom_BP_GO:0021536	TM_pom	BP	GO:0021536	diencephalon development	12/490	54/15707	7.74e-08	2.24e-06	1.48e-06	22187/68169/16974/22418/12159/22417/24136/18187/18741/15205/21416/17967	12	12	Suppressed	-0.283207	-0.877371	0.611799	0.854458	0.820896	165	tags=50%, list=32%, signal=35%	Bmp4/Ubb/Zeb2/Wnt5a/Wnt4/Ndnf
TM_pom_BP_GO:0048592	TM_pom	BP	GO:0048592	eye morphogenesis	21/490	170/15707	7.8e-08	2.25e-06	1.48e-06	19242/18212/12837/329941/14184/17150/14238/16974/14451/12159/21385/12832/23965/20666/18741/20682/218772/11826/12043/12831/19662	21	21	Suppressed	-0.346563	-1.28758	0.170582	0.659727	0.633814	24	tags=19%, list=5%, signal=19%	Col5a1/Col5a2/Ntrk2/Ptn
TM_pom_BP_GO:0031346	TM_pom	BP	GO:0031346	positive regulation of cell projection organization	35/490	413/15707	8.69e-08	2.46e-06	1.62e-06	20720/18606/19242/19762/20317/17242/18212/21809/19735/19266/21844/14362/68169/20315/15234/16974/22418/12159/24136/216166/20393/23965/208727/20266/18708/16001/18213/11816/58804/50791/260409/11826/208647/12904/20482	35	35	Suppressed	-0.289232	-1.23922	0.187085	0.661916	0.635917	51	tags=17%, list=10%, signal=17%	Ndnf/Rit2/Rgs2/Ntrk2/Enpp2/Ptn
TM_pom_BP_GO:0046546	TM_pom	BP	GO:0046546	development of primary male sexual characteristics	16/490	101/15707	8.77e-08	2.46e-06	1.62e-06	56312/18595/53381/20319/22187/18671/21808/15894/14609/22418/22417/20682/11835/20377/12043/19662	16	16	Suppressed	-0.315649	-1.07538	0.36499	0.73859	0.70958	86	tags=38%, list=17%, signal=32%	Tgfb2/Wnt5a/Wnt4/Abcb1a/Pdgfra/Nupr1
TM_pom_BP_GO:2000648	TM_pom	BP	GO:2000648	positive regulation of stem cell proliferation	9/490	29/15707	1.49e-07	4.09e-06	2.7e-06	17311/14609/12159/16998/218952/14825/20666/21386/22341	9	9	Suppressed	-0.380277	-1.07353	0.378199	0.744929	0.715669	174	tags=67%, list=34%, signal=45%	Tbx3/Bmp4/Fermt2/Gja1/Kitl/Cxcl1
TM_pom_BP_GO:1902992	TM_pom	BP	GO:1902992	negative regulation of amyloid precursor protein catabolic process	8/490	22/15707	1.84e-07	4.99e-06	3.29e-06	16000/12759/18212/233744/104001/20660/11816/56177	8	8	Suppressed	-0.481431	-1.30499	0.186052	0.661916	0.635917	41	tags=38%, list=8%, signal=35%	Spon1/Ntrk2/Igf1
TM_pom_BP_GO:0007565	TM_pom	BP	GO:0007565	female pregnancy	16/490	107/15707	2e-07	5.38e-06	3.54e-06	19242/16777/16011/19223/16157/14609/22417/21824/53614/21857/15446/232345/11835/18783/12846/67971	16	16	Suppressed	-0.462506	-1.57571	0.0460185	0.56317	0.541049	72	tags=31%, list=14%, signal=28%	Wnt4/Tppp3/Lamb1/A2m/Ptn
TM_pom_BP_GO:0014909	TM_pom	BP	GO:0014909	smooth muscle cell migration	15/490	94/15707	2.01e-07	5.38e-06	3.54e-06	16000/17242/16011/13653/14783/14745/106014/20660/19091/208727/19241/50706/18133/17260/12043	15	15	Suppressed	-0.273537	-0.912751	0.577503	0.835982	0.803146	5	tags=47%, list=1%, signal=48%	Hdac4/Sorl1/Tmsb4x/Lpar1/Mef2c/Tafa5/Igf1
TM_pom_BP_GO:0046661	TM_pom	BP	GO:0046661	male sex differentiation	17/490	121/15707	2.11e-07	5.61e-06	3.69e-06	56312/18595/53381/20319/22187/18671/21808/15894/14609/22418/22417/21386/20682/11835/20377/12043/19662	17	17	Suppressed	-0.300508	-1.04611	0.399775	0.756056	0.726359	86	tags=35%, list=17%, signal=30%	Tgfb2/Wnt5a/Wnt4/Abcb1a/Pdgfra/Nupr1
TM_pom_BP_GO:0032102	TM_pom	BP	GO:0032102	negative regulation of response to external stimulus	30/490	336/15707	2.43e-07	6.39e-06	4.21e-06	20720/16000/20317/17242/20496/21825/19223/18595/19252/17470/16002/15234/56045/17965/66208/20348/56496/14609/22418/22417/12490/93694/106014/19091/21824/54598/232345/18133/18007/11816	30	30	Suppressed	-0.29459	-1.21261	0.216318	0.683116	0.656284	104	tags=40%, list=20%, signal=34%	Clec2d/Tafa5/Sema3c/Hgf/Wnt5a/Wnt4/Dusp1/Nbl1/Cd34/Pdgfra/Igf1/A2m
TM_pom_BP_GO:0072091	TM_pom	BP	GO:0072091	regulation of stem cell proliferation	11/490	49/15707	2.43e-07	6.39e-06	4.21e-06	14114/17311/14609/12159/16998/218952/14825/20666/21386/22341/12192	11	11	Suppressed	-0.295076	-0.886499	0.602636	0.852402	0.818921	176	tags=64%, list=34%, signal=43%	Zfp36l1/Tbx3/Bmp4/Fermt2/Gja1/Kitl/Cxcl1
TM_pom_BP_GO:0045669	TM_pom	BP	GO:0045669	positive regulation of osteoblast differentiation	13/490	71/15707	2.52e-07	6.57e-06	4.33e-06	16000/14683/20319/14119/14560/16007/16478/12159/12608/22417/218952/20666/17260	13	13	Suppressed	-0.251614	-0.802997	0.70501	0.909532	0.873807	5	tags=54%, list=1%, signal=55%	Bmp4/Jund/Fermt2/Mef2c/Wnt4/Cebpb/Igf1
TM_pom_BP_GO:1901214	TM_pom	BP	GO:1901214	regulation of neuron death	31/490	356/15707	2.67e-07	6.88e-06	4.53e-06	16000/12759/20317/17242/11600/12705/18212/21809/17748/17470/22187/14184/14362/68169/21808/13653/13642/66208/22418/12608/12490/20660/208727/18008/14062/17260/18007/11816/74747/18205/12043	31	31	Suppressed	-0.263567	-1.09481	0.344478	0.725205	0.69672	86	tags=29%, list=17%, signal=26%	Tgfb2/Wnt5a/Cebpb/Ndnf/Cited1/Cd34/Mt1/Ntrk2/Igf1
TM_pom_BP_GO:0072210	TM_pom	BP	GO:0072210	metanephric nephron development	9/490	31/15707	2.84e-07	7.3e-06	4.81e-06	12705/18595/13653/12159/22417/16779/20682/15205/11826	9	9	Suppressed	-0.460572	-1.30021	0.185569	0.661916	0.635917	72	tags=89%, list=14%, signal=78%	Sox9/Lamb2/Hes1/Aqp1/Bmp4/Wnt4/Cited1/Pdgfra
TM_pom_BP_GO:0030501	TM_pom	BP	GO:0030501	positive regulation of bone mineralization	10/490	41/15707	3.74e-07	9.39e-06	6.19e-06	19242/14119/14184/16007/14758/67972/12159/22417/17260/100038882	10	10	Suppressed	-0.447307	-1.31082	0.167626	0.659727	0.633814	111	tags=50%, list=22%, signal=40%	Atp2b1/Mef2c/Gpm6b/Wnt4/Ptn
TM_pom_BP_GO:0060326	TM_pom	BP	GO:0060326	cell chemotaxis	26/490	271/15707	3.94e-07	9.72e-06	6.41e-06	18606/19242/17242/20496/21825/18595/19252/13616/14456/21844/13479/20315/15234/268373/17965/20750/18654/22418/14745/15945/16803/14825/16948/18133/22341/15370	26	26	Suppressed	-0.390927	-1.54419	0.0457196	0.56317	0.541049	58	tags=31%, list=11%, signal=29%	Dusp1/Cxcl1/Nbl1/Edn3/Dpep1/Pdgfra/Enpp2/Ptn
TM_pom_BP_GO:0090596	TM_pom	BP	GO:0090596	sensory organ morphogenesis	26/490	271/15707	3.94e-07	9.72e-06	6.41e-06	19242/18212/12837/12814/329941/14184/320398/17150/14238/16974/14451/22418/12159/21385/12832/23965/20666/18741/20682/17701/218772/11826/16658/12043/12831/19662	26	26	Suppressed	-0.287052	-1.13388	0.297644	0.710266	0.682368	24	tags=12%, list=5%, signal=12%	Col5a2/Ntrk2/Ptn
TM_pom_BP_GO:0046545	TM_pom	BP	GO:0046545	development of primary female sexual characteristics	15/490	99/15707	4.04e-07	9.91e-06	6.53e-06	56312/11600/18595/12394/22187/17311/12159/12608/22417/13134/268903/20377/12043/18783/99929	15	15	Suppressed	-0.350386	-1.16919	0.270191	0.70017	0.672669	173	tags=60%, list=34%, signal=41%	Dach1/Bmp4/Tiparp/Ubb/Kitl/Wnt4/Cebpb/Pdgfra/Nupr1
TM_pom_BP_GO:0042326	TM_pom	BP	GO:0042326	negative regulation of phosphorylation	32/490	382/15707	4.08e-07	9.96e-06	6.56e-06	16000/56312/65112/11600/67916/19252/19735/20319/15234/268373/14114/14783/16974/13197/12159/14586/11461/98496/20660/16362/208727/17873/16001/77446/18213/11816/24066/74747/18205/24063/20377/19084	32	32	Suppressed	-0.196796	-0.825406	0.714788	0.910739	0.874967	64	tags=16%, list=12%, signal=15%	Gadd45a/Dusp1/Rgs2/Nupr1/Igf1
TM_pom_BP_GO:0010632	TM_pom	BP	GO:0010632	regulation of epithelial cell migration	23/490	223/15707	5.22e-07	1.24e-05	8.16e-06	16000/18606/20317/13179/21825/11600/67916/70097/16002/21808/13197/22418/12159/12512/16600/20682/14645/17260/11852/11816/22341/11826/68792	23	23	Suppressed	-0.327375	-1.24601	0.199353	0.6735	0.647046	86	tags=30%, list=17%, signal=27%	Tgfb2/Wnt5a/Sash1/Gadd45a/Dcn/Igf1/Enpp2
TM_pom_BP_GO:1904035	TM_pom	BP	GO:1904035	regulation of epithelial cell apoptotic process	14/490	88/15707	5.33e-07	1.26e-05	8.3e-06	16000/56312/17242/21825/11600/14456/12822/68169/15894/12159/18569/16001/21416/12192	14	14	Suppressed	-0.341332	-1.11161	0.33476	0.723129	0.694726	9	tags=21%, list=2%, signal=22%	Ndnf/Nupr1/Igf1
TM_pom_BP_GO:0042476	TM_pom	BP	GO:0042476	odontogenesis	15/490	102/15707	6e-07	1.4e-05	9.21e-06	22409/16777/22420/18595/16974/66042/14451/12159/12490/30963/18741/21416/17701/12842/15903	15	15	Suppressed	-0.575009	-1.91872	0.00629921	0.506547	0.48665	44	tags=40%, list=9%, signal=38%	Col1a1/Cd34/Wnt6/Lamb1/Pdgfra/Wnt10a
TM_pom_BP_GO:0044706	TM_pom	BP	GO:0044706	multi-multicellular organism process	17/490	130/15707	6.01e-07	1.4e-05	9.21e-06	20720/19242/16777/16011/19223/16157/14609/22417/21824/53614/21857/15446/232345/11835/18783/12846/67971	17	17	Suppressed	-0.392907	-1.36776	0.123112	0.659727	0.633814	27	tags=29%, list=5%, signal=29%	Wnt4/Tppp3/Lamb1/A2m/Ptn
TM_pom_BP_GO:0010976	TM_pom	BP	GO:0010976	positive regulation of neuron projection development	22/490	210/15707	7.06e-07	1.59e-05	1.05e-05	20720/19242/19762/20317/17242/18212/19735/21844/14362/68169/15234/16974/22418/12159/216166/23965/20266/16001/18213/11816/50791/208647	22	22	Suppressed	-0.317826	-1.19967	0.244814	0.698266	0.670839	51	tags=32%, list=10%, signal=30%	Hgf/Wnt5a/Ndnf/Rit2/Rgs2/Ntrk2/Ptn
TM_pom_BP_GO:1901888	TM_pom	BP	GO:1901888	regulation of cell junction assembly	22/490	210/15707	7.06e-07	1.59e-05	1.05e-05	18606/12741/18212/17926/19266/14362/14758/14609/22418/396184/22417/23888/21872/11465/218952/18708/17260/18213/11856/107581/50768/68792	22	22	Suppressed	-0.340071	-1.28364	0.174379	0.661916	0.635917	136	tags=50%, list=27%, signal=38%	Fermt2/Actg1/Gja1/Mef2c/Tjp1/Wnt5a/Gpm6b/Wnt4/Ntrk2/Cldn5/Enpp2
TM_pom_BP_GO:0061564	TM_pom	BP	GO:0061564	axon development	36/490	471/15707	7.11e-07	1.6e-05	1.05e-05	19242/13723/80883/18212/21844/14184/13175/20315/21808/13642/20348/14451/22418/77579/24136/14009/11461/18187/16779/20266/16600/16001/18007/20564/13518/22323/22352/18213/14042/11816/17967/18205/56177/12043/12904/20482	36	36	Suppressed	-0.248084	-1.06846	0.372099	0.74192	0.712779	18	tags=8%, list=4%, signal=9%	Ntrk2/Ntng1/Ptn
TM_pom_BP_GO:0007409	TM_pom	BP	GO:0007409	axonogenesis	34/490	432/15707	7.52e-07	1.68e-05	1.11e-05	13723/80883/18212/21844/14184/13175/20315/21808/13642/20348/14451/22418/77579/24136/14009/11461/18187/16779/20266/16001/18007/20564/13518/22323/22352/18213/14042/11816/17967/18205/56177/12043/12904/20482	34	34	Suppressed	-0.11761	-0.501839	0.977348	1	0.960721	18	tags=24%, list=4%, signal=24%	Actb/Zeb2/Vim/Sema3c/Tgfb2/Wnt5a/Ntrk2/Ntng1
TM_pom_BP_GO:0050679	TM_pom	BP	GO:0050679	positive regulation of epithelial cell proliferation	21/490	195/15707	8.03e-07	1.78e-05	1.18e-05	16000/19242/17242/13601/14184/16002/20315/18654/13649/14451/22418/12159/20666/20682/14645/11835/12444/21416/22341/20377/15370	21	21	Suppressed	-0.371383	-1.3798	0.116306	0.657332	0.631513	5	tags=14%, list=1%, signal=15%	Ecm1/Igf1/Ptn
TM_pom_BP_GO:0071417	TM_pom	BP	GO:0071417	cellular response to organonitrogen compound	36/490	476/15707	9.13e-07	1.99e-05	1.31e-05	16000/12293/16011/18212/18595/50915/14683/16002/13653/14783/13649/15894/14609/67972/12608/12832/11461/98496/20393/20660/16362/18708/12385/20682/17260/16001/107351/22352/107581/12192/11826/20377/14148/12843/12842/15370	36	36	Suppressed	-0.347795	-1.49789	0.045944	0.56317	0.541049	128	tags=42%, list=25%, signal=34%	Gja1/Actb/Pid1/Atp2b1/Mef2c/Col1a2/Vim/Grb14/Cebpb/Col1a1/Col5a2/Pdgfra/Ntrk2/Cacna2d1/Igf1
TM_pom_BP_GO:0008217	TM_pom	BP	GO:0008217	regulation of blood pressure	19/490	165/15707	9.7e-07	2.09e-05	1.38e-05	98660/271127/11475/59027/14683/15902/13616/14456/14609/67972/12490/14062/18708/50706/11835/14042/22341/230857/12843	19	19	Suppressed	-0.4109	-1.48374	0.0713146	0.612094	0.588051	36	tags=26%, list=7%, signal=25%	Adamts16/Edn3/Cd34/Nampt/Atp1a2
TM_pom_BP_GO:0045445	TM_pom	BP	GO:0045445	myoblast differentiation	13/490	80/15707	1.06e-06	2.24e-05	1.47e-05	16000/16852/66042/12159/21385/15945/18708/21386/20682/17260/21416/12192/15903	13	13	Suppressed	-0.301703	-0.962852	0.503482	0.812371	0.780462	5	tags=46%, list=1%, signal=47%	Zfp36l1/Tbx3/Bmp4/Tbx2/Mef2c/Igf1
TM_pom_BP_GO:0014812	TM_pom	BP	GO:0014812	muscle cell migration	15/490	107/15707	1.13e-06	2.37e-05	1.56e-05	16000/17242/16011/13653/14783/14745/106014/20660/19091/208727/19241/50706/18133/17260/12043	15	15	Suppressed	-0.273537	-0.912751	0.577503	0.835982	0.803146	5	tags=47%, list=1%, signal=48%	Hdac4/Sorl1/Tmsb4x/Lpar1/Mef2c/Tafa5/Igf1
TM_pom_BP_GO:2000242	TM_pom	BP	GO:2000242	negative regulation of reproductive process	10/490	46/15707	1.18e-06	2.47e-05	1.63e-05	16000/20317/53381/50915/14609/22418/12159/22417/21857/240725	10	10	Suppressed	-0.425054	-1.24561	0.21612	0.683116	0.656284	81	tags=40%, list=16%, signal=34%	Wnt5a/Wnt4/Grb14/Igf1
TM_pom_BP_GO:0001764	TM_pom	BP	GO:0001764	neuron migration	19/490	169/15707	1.4e-06	2.84e-05	1.87e-05	80883/17242/18212/14456/68169/13175/20315/14609/77579/19091/18187/59009/18741/17260/18007/215690/18213/74747/56177	19	19	Suppressed	-0.203745	-0.735713	0.8036	0.94826	0.911014	51	tags=16%, list=10%, signal=15%	Ndnf/Ntrk2/Ntng1
TM_pom_BP_GO:0003012	TM_pom	BP	GO:0003012	muscle system process	30/490	365/15707	1.4e-06	2.84e-05	1.87e-05	16000/98660/14219/12293/16011/11475/17926/19735/107589/13616/21844/17904/242202/12845/109624/67972/21385/19091/208727/54598/14062/20266/21386/16600/11835/17260/12289/240725/13400/230857	30	30	Suppressed	-0.268997	-1.10726	0.324712	0.720395	0.692099	42	tags=17%, list=8%, signal=16%	Rgs2/Edn3/Cacna2d1/Atp1a2/Igf1
TM_pom_BP_GO:0048738	TM_pom	BP	GO:0048738	cardiac muscle tissue development	23/490	236/15707	1.41e-06	2.84e-05	1.87e-05	16000/11600/18595/19735/15902/12814/21808/13642/14609/16974/22418/77579/12159/21385/19091/21386/18741/17260/77446/17967/218772/19084/19662	23	23	Suppressed	-0.236839	-0.901425	0.593209	0.850443	0.817039	42	tags=48%, list=8%, signal=46%	Tbx3/Bmp4/Efnb2/Tbx2/Gja1/Mef2c/Tgfb2/Wnt5a/Rgs2/Pdgfra/Igf1
TM_pom_BP_GO:0042698	TM_pom	BP	GO:0042698	ovulation cycle	10/490	47/15707	1.46e-06	2.93e-05	1.93e-05	18606/19242/17242/18595/12394/13653/13649/16001/268903/18783	10	10	Suppressed	-0.656733	-1.92454	0.005093	0.506547	0.48665	20	tags=30%, list=4%, signal=29%	Pdgfra/Enpp2/Ptn
TM_pom_BP_GO:0072207	TM_pom	BP	GO:0072207	metanephric epithelium development	7/490	20/15707	1.5e-06	2.98e-05	1.97e-05	211401/329628/22417/16779/20682/15205/11826	7	7	Suppressed	-0.311701	-0.804457	0.693696	0.902359	0.866916	263	tags=86%, list=51%, signal=42%	Sox9/Lamb2/Hes1/Aqp1/Mtss1/Wnt4
TM_pom_BP_GO:0060740	TM_pom	BP	GO:0060740	prostate gland epithelium morphogenesis	8/490	28/15707	1.52e-06	3e-05	1.98e-05	16000/22418/12159/20682/11835/16001/240725/20377	8	8	Suppressed	-0.503442	-1.36466	0.139047	0.659727	0.633814	5	tags=25%, list=1%, signal=25%	Wnt5a/Igf1
TM_pom_BP_GO:0008585	TM_pom	BP	GO:0008585	female gonad development	14/490	96/15707	1.58e-06	3.09e-05	2.04e-05	56312/11600/18595/12394/22187/17311/12159/12608/22417/268903/20377/12043/18783/99929	14	14	Suppressed	-0.351528	-1.14482	0.300068	0.711488	0.683542	165	tags=57%, list=32%, signal=40%	Bmp4/Tiparp/Ubb/Kitl/Wnt4/Cebpb/Pdgfra/Nupr1
TM_pom_BP_GO:0072080	TM_pom	BP	GO:0072080	nephron tubule development	13/490	83/15707	1.63e-06	3.18e-05	2.09e-05	271127/14734/22420/211401/18654/329628/12159/22417/20682/15205/17260/11826/12043	13	13	Suppressed	-0.238473	-0.761059	0.752865	0.920235	0.88409	108	tags=38%, list=21%, signal=31%	Mef2c/Mtss1/Wnt4/Adamts16/Wnt6
TM_pom_BP_GO:0045444	TM_pom	BP	GO:0045444	fat cell differentiation	23/490	241/15707	2.02e-06	3.8e-05	2.5e-05	16000/74186/18595/19735/15902/20319/14560/12193/16974/22418/12608/70717/218952/20341/16600/15205/81703/21416/11861/12192/20377/117167/15370	23	23	Suppressed	-0.255367	-0.971942	0.497112	0.806846	0.775154	155	tags=48%, list=30%, signal=35%	Selenbp1/Arl4a/Medag/Fermt2/Klf4/Steap4/Wnt5a/Cebpb/Rgs2/Pdgfra/Igf1
TM_pom_BP_GO:0060512	TM_pom	BP	GO:0060512	prostate gland morphogenesis	8/490	29/15707	2.04e-06	3.8e-05	2.5e-05	16000/22418/12159/20682/11835/16001/240725/20377	8	8	Suppressed	-0.503442	-1.36466	0.139047	0.659727	0.633814	5	tags=25%, list=1%, signal=25%	Wnt5a/Igf1
TM_pom_BP_GO:0061333	TM_pom	BP	GO:0061333	renal tubule morphogenesis	12/490	72/15707	2.08e-06	3.86e-05	2.54e-05	271127/14734/22420/211401/18654/329628/12159/22417/20682/15205/17260/12043	12	12	Suppressed	-0.256904	-0.795883	0.715154	0.910742	0.87497	108	tags=42%, list=21%, signal=34%	Mef2c/Mtss1/Wnt4/Adamts16/Wnt6
TM_pom_BP_GO:0048545	TM_pom	BP	GO:0048545	response to steroid hormone	20/490	191/15707	2.28e-06	4.18e-05	2.76e-05	16000/98660/18212/21809/11647/21808/20750/12193/12159/20393/18708/16948/11835/11898/74747/12192/11826/20377/12043/11670	20	20	Suppressed	-0.455349	-1.66942	0.0252467	0.552413	0.530715	23	tags=20%, list=4%, signal=20%	Aldh3a1/Ntrk2/Atp1a2/Igf1
TM_pom_BP_GO:0009612	TM_pom	BP	GO:0009612	response to mechanical stimulus	16/490	128/15707	2.36e-06	4.32e-05	2.85e-05	20720/16000/19242/98660/17242/20496/21825/12814/20315/667742/14009/22411/20682/18035/11826/12842	16	16	Suppressed	-0.423136	-1.44158	0.0866231	0.636415	0.611418	6	tags=25%, list=1%, signal=26%	Col1a1/Atp1a2/Igf1/Ptn
TM_pom_BP_GO:0014910	TM_pom	BP	GO:0014910	regulation of smooth muscle cell migration	13/490	86/15707	2.46e-06	4.45e-05	2.94e-05	16000/17242/16011/13653/14745/106014/20660/19091/208727/19241/50706/17260/12043	13	13	Suppressed	-0.302875	-0.966592	0.498315	0.806846	0.775154	5	tags=54%, list=1%, signal=55%	Hdac4/Sorl1/Tmsb4x/Lpar1/Mef2c/Tafa5/Igf1
TM_pom_BP_GO:0050920	TM_pom	BP	GO:0050920	regulation of chemotaxis	21/490	209/15707	2.48e-06	4.45e-05	2.94e-05	19242/17242/21825/18595/19252/13616/14456/21844/20315/17965/13642/18654/20348/22418/14745/15945/16803/18133/18213/22341/18205	21	21	Suppressed	-0.290392	-1.07889	0.360319	0.737316	0.708355	58	tags=33%, list=11%, signal=31%	Sema3c/Wnt5a/Dusp1/Nbl1/Edn3/Pdgfra/Ptn
TM_pom_BP_GO:0070997	TM_pom	BP	GO:0070997	neuron death	31/490	395/15707	2.48e-06	4.45e-05	2.94e-05	16000/12759/20317/17242/11600/12705/18212/21809/17748/17470/22187/14184/14362/68169/21808/13653/13642/66208/22418/12608/12490/20660/208727/18008/14062/17260/18007/11816/74747/18205/12043	31	31	Suppressed	-0.263567	-1.09481	0.344478	0.725205	0.69672	86	tags=29%, list=17%, signal=26%	Tgfb2/Wnt5a/Cebpb/Ndnf/Cited1/Cd34/Mt1/Ntrk2/Igf1
TM_pom_BP_GO:0014013	TM_pom	BP	GO:0014013	regulation of gliogenesis	15/490	114/15707	2.55e-06	4.55e-05	3e-05	20720/16000/18606/19242/17242/15902/14184/13649/12159/20666/103743/15205/22352/18213/18205	15	15	Suppressed	-0.542036	-1.80869	0.0132733	0.506547	0.48665	5	tags=20%, list=1%, signal=20%	Igf1/Enpp2/Ptn
TM_pom_BP_GO:0048009	TM_pom	BP	GO:0048009	insulin-like growth factor receptor signaling pathway	8/490	30/15707	2.71e-06	4.74e-05	3.12e-05	16000/16011/16012/16010/14783/18708/11835/16001	8	8	Suppressed	-0.386337	-1.04723	0.408614	0.762227	0.732288	5	tags=12%, list=1%, signal=13%	Igf1
TM_pom_BP_GO:0034329	TM_pom	BP	GO:0034329	cell junction assembly	31/490	397/15707	2.75e-06	4.8e-05	3.16e-05	18606/12741/18212/17926/19266/246316/14362/13642/14758/14609/22418/396184/22417/23888/21872/11465/218952/11461/18708/12385/22411/17260/13518/77446/18213/11856/107581/50791/50768/12043/68792	31	31	Suppressed	-0.25684	-1.06686	0.372263	0.74192	0.712779	136	tags=39%, list=27%, signal=30%	Fermt2/Actg1/Gja1/Actb/Mef2c/Tjp1/Wnt5a/Gpm6b/Wnt4/Ntrk2/Cldn5/Enpp2
TM_pom_BP_GO:0051145	TM_pom	BP	GO:0051145	smooth muscle cell differentiation	12/490	74/15707	2.81e-06	4.88e-05	3.22e-05	12845/12159/21385/22417/19241/21386/18741/20682/18569/15205/17260/18205	12	12	Suppressed	-0.258821	-0.801822	0.710651	0.910087	0.87434	291	tags=92%, list=57%, signal=41%	Ntf3/Pdcd4/Pitx2/Sox9/Hes1/Tbx3/Tmsb4x/Bmp4/Tbx2/Mef2c/Wnt4
TM_pom_BP_GO:0060325	TM_pom	BP	GO:0060325	face morphogenesis	9/490	40/15707	3e-06	5.2e-05	3.43e-05	18595/21809/21808/16974/78892/21416/17701/99929/12842	9	9	Suppressed	-0.401767	-1.1342	0.32083	0.719356	0.6911	86	tags=44%, list=17%, signal=38%	Tgfb2/Crispld2/Col1a1/Pdgfra
TM_pom_BP_GO:0007263	TM_pom	BP	GO:0007263	nitric oxide mediated signal transduction	7/490	22/15707	3.13e-06	5.38e-05	3.55e-05	21825/17748/17750/68169/242202/13649/11816	7	7	Suppressed	-0.401358	-1.03585	0.417174	0.766124	0.736032	51	tags=43%, list=10%, signal=39%	Ndnf/Mt2/Mt1
TM_pom_BP_GO:0035051	TM_pom	BP	GO:0035051	cardiocyte differentiation	18/490	162/15707	3.13e-06	5.38e-05	3.55e-05	16000/18595/19735/21808/13642/20348/13649/16974/77579/12159/21385/19091/21386/18741/18569/15205/17260/218772	18	18	Suppressed	-0.385331	-1.36603	0.123954	0.659727	0.633814	174	tags=56%, list=34%, signal=38%	Tbx3/Bmp4/Efnb2/Tbx2/Mef2c/Sema3c/Tgfb2/Rgs2/Pdgfra/Igf1
TM_pom_BP_GO:0061326	TM_pom	BP	GO:0061326	renal tubule development	13/490	89/15707	3.65e-06	6.16e-05	4.06e-05	271127/14734/22420/211401/18654/329628/12159/22417/20682/15205/17260/11826/12043	13	13	Suppressed	-0.238473	-0.761059	0.752865	0.920235	0.88409	108	tags=38%, list=21%, signal=31%	Mef2c/Mtss1/Wnt4/Adamts16/Wnt6
TM_pom_BP_GO:1903036	TM_pom	BP	GO:1903036	positive regulation of response to wounding	11/490	64/15707	4.06e-06	6.79e-05	4.48e-05	19242/17242/21825/67916/107589/11465/218952/14062/16001/107351/18213	11	11	Suppressed	-0.345543	-1.03812	0.420371	0.766778	0.73666	2	tags=27%, list=0%, signal=28%	Fermt2/Actg1/Ptn
TM_pom_BP_GO:0048661	TM_pom	BP	GO:0048661	positive regulation of smooth muscle cell proliferation	14/490	104/15707	4.18e-06	6.96e-05	4.59e-05	16000/16011/21825/59027/15902/13653/13649/14609/21817/12159/208727/54598/15446/16001	14	14	Suppressed	-0.309742	-1.00874	0.451228	0.786152	0.755273	22	tags=14%, list=4%, signal=14%	Nampt/Igf1
TM_pom_BP_GO:1901215	TM_pom	BP	GO:1901215	negative regulation of neuron death	22/490	234/15707	4.31e-06	7.15e-05	4.71e-05	16000/20317/17242/11600/12705/18212/21809/17748/17470/14362/68169/66208/12608/12490/20660/18008/14062/17260/18007/11816/18205/12043	22	22	Suppressed	-0.387959	-1.46439	0.0749943	0.621718	0.597298	60	tags=32%, list=12%, signal=29%	Cebpb/Ndnf/Cited1/Cd34/Mt1/Ntrk2/Igf1
TM_pom_BP_GO:0061005	TM_pom	BP	GO:0061005	cell differentiation involved in kidney development	9/490	42/15707	4.63e-06	7.61e-05	5.01e-05	12705/211401/329628/12159/22417/16779/15205/17260/14042	9	9	Suppressed	-0.407802	-1.15123	0.302957	0.712145	0.684173	108	tags=89%, list=21%, signal=71%	Lamb2/Ext1/Hes1/Bmp4/Mef2c/Mtss1/Wnt4/Cited1
TM_pom_BP_GO:0006939	TM_pom	BP	GO:0006939	smooth muscle contraction	14/490	105/15707	4.68e-06	7.66e-05	5.05e-05	98660/11475/19735/107589/13616/12845/109624/67972/21385/19091/54598/14062/21386/240725	14	14	Suppressed	-0.344387	-1.12156	0.324172	0.719724	0.691454	42	tags=21%, list=8%, signal=20%	Rgs2/Edn3/Atp1a2
TM_pom_BP_GO:0051384	TM_pom	BP	GO:0051384	response to glucocorticoid	11/490	65/15707	4.75e-06	7.72e-05	5.09e-05	11647/12193/12159/20393/18708/11898/74747/12192/11826/12043/11670	11	11	Suppressed	-0.17213	-0.517133	0.962922	0.998572	0.95935	23	tags=64%, list=4%, signal=62%	Bcl2/Ass1/Ddit4/Aqp1/Zfp36l1/Bmp4/Aldh3a1
TM_pom_BP_GO:0048706	TM_pom	BP	GO:0048706	embryonic skeletal system development	14/490	106/15707	5.25e-06	8.49e-05	5.59e-05	18595/21809/14683/12814/21808/14451/22418/12159/20666/17260/14042/240725/12842/19662	14	14	Suppressed	-0.234334	-0.763154	0.751746	0.920235	0.88409	108	tags=36%, list=21%, signal=29%	Mef2c/Tgfb2/Wnt5a/Col1a1/Pdgfra
TM_pom_BP_GO:0050767	TM_pom	BP	GO:0050767	regulation of neurogenesis	31/490	410/15707	5.33e-06	8.59e-05	5.66e-05	20720/16000/18606/19242/20317/17242/18212/19266/15902/21844/14184/20315/20348/13649/22418/12159/24136/20393/20660/20893/20666/103743/12385/15205/22352/18213/11816/22341/18205/12904/20482	31	31	Suppressed	-0.369699	-1.53566	0.0442665	0.560503	0.538487	18	tags=13%, list=4%, signal=13%	Ntrk2/Igf1/Enpp2/Ptn
TM_pom_BP_GO:0071498	TM_pom	BP	GO:0071498	cellular response to fluid shear stress	6/490	16/15707	5.49e-06	8.78e-05	5.79e-05	211401/20750/16598/16600/17260/11898	6	6	Suppressed	-0.327266	-0.797462	0.699117	0.904778	0.869239	134	tags=50%, list=26%, signal=37%	Klf4/Mef2c/Mtss1
TM_pom_BP_GO:0010463	TM_pom	BP	GO:0010463	mesenchymal cell proliferation	10/490	54/15707	5.55e-06	8.86e-05	5.84e-05	19242/14734/329628/16974/14451/22418/12159/22411/20682/17701	10	10	Suppressed	-0.379026	-1.11072	0.333481	0.722502	0.694123	2	tags=20%, list=0%, signal=20%	Wnt5a/Ptn
TM_pom_BP_GO:0071396	TM_pom	BP	GO:0071396	cellular response to lipid	31/490	411/15707	5.59e-06	8.89e-05	5.86e-05	16000/98660/12759/18212/13082/70097/20750/13649/12193/16974/12159/12608/14745/15945/98496/20393/16803/14825/20682/18569/11835/17260/22352/18035/268903/74747/12192/11826/20377/14148/15903	31	31	Suppressed	-0.242513	-1.00735	0.459854	0.791189	0.760112	18	tags=19%, list=4%, signal=20%	Sash1/Cebpb/Cxcl1/Ntrk2/Atp1a2/Igf1
TM_pom_BP_GO:0010563	TM_pom	BP	GO:0010563	negative regulation of phosphorus metabolic process	34/490	474/15707	5.89e-06	9.26e-05	6.1e-05	16000/56312/65112/11600/67916/19252/19735/20319/15234/21808/268373/14114/14783/16974/13197/12159/14586/11461/98496/20660/19091/16362/208727/17873/16001/77446/18213/11816/24066/74747/18205/24063/20377/19084	34	34	Suppressed	-0.186617	-0.796289	0.757905	0.924163	0.887863	9	tags=29%, list=2%, signal=31%	Actb/Pid1/Gfra2/Hgf/Tgfb2/Gadd45a/Dusp1/Rgs2/Nupr1/Igf1
TM_pom_BP_GO:0045936	TM_pom	BP	GO:0045936	negative regulation of phosphate metabolic process	34/490	474/15707	5.89e-06	9.26e-05	6.1e-05	16000/56312/65112/11600/67916/19252/19735/20319/15234/21808/268373/14114/14783/16974/13197/12159/14586/11461/98496/20660/19091/16362/208727/17873/16001/77446/18213/11816/24066/74747/18205/24063/20377/19084	34	34	Suppressed	-0.186617	-0.796289	0.757905	0.924163	0.887863	9	tags=29%, list=2%, signal=31%	Actb/Pid1/Gfra2/Hgf/Tgfb2/Gadd45a/Dusp1/Rgs2/Nupr1/Igf1
TM_pom_BP_GO:0045685	TM_pom	BP	GO:0045685	regulation of glial cell differentiation	12/490	80/15707	6.51e-06	0.000102016	6.72e-05	20720/18606/19242/17242/15902/14184/12159/103743/15205/21416/18213/18205	12	12	Suppressed	-0.490676	-1.52011	0.0655258	0.604834	0.581077	3	tags=17%, list=1%, signal=17%	Enpp2/Ptn
TM_pom_BP_GO:0010721	TM_pom	BP	GO:0010721	negative regulation of cell development	19/490	188/15707	6.85e-06	0.000106149	7e-05	16000/19242/50915/15902/14184/14114/20348/22418/12159/20660/20666/50706/103743/12385/15205/76566/107351/18213/24066	19	19	Suppressed	-0.433731	-1.56618	0.0480747	0.567372	0.545086	5	tags=26%, list=1%, signal=27%	Sema3c/Wnt5a/Grb14/Igf1/Ptn
TM_pom_BP_GO:0072088	TM_pom	BP	GO:0072088	nephron epithelium morphogenesis	11/490	68/15707	7.48e-06	0.000114797	7.57e-05	271127/14734/22420/12705/18654/329628/12159/22417/20682/15205/12043	11	11	Suppressed	-0.323616	-0.972243	0.490507	0.80644	0.774764	72	tags=36%, list=14%, signal=32%	Wnt4/Adamts16/Cited1/Wnt6
TM_pom_BP_GO:0060323	TM_pom	BP	GO:0060323	head morphogenesis	9/490	45/15707	8.47e-06	0.000128705	8.48e-05	18595/21809/21808/16974/78892/21416/17701/99929/12842	9	9	Suppressed	-0.401767	-1.1342	0.32083	0.719356	0.6911	86	tags=44%, list=17%, signal=38%	Tgfb2/Crispld2/Col1a1/Pdgfra
TM_pom_BP_GO:1903706	TM_pom	BP	GO:1903706	regulation of hemopoiesis	27/490	341/15707	9.42e-06	0.000142114	9.37e-05	19242/17242/83924/14683/15902/12394/14456/14184/17311/12193/12159/12608/93694/59009/16362/18708/16948/17260/66058/18035/12192/16658/50794/20377/20677/100038882/65963	27	27	Suppressed	-0.194864	-0.779285	0.763281	0.926623	0.890226	2	tags=19%, list=0%, signal=19%	Mef2c/Kitl/Clec2d/Cebpb/Ptn
TM_pom_BP_GO:0034754	TM_pom	BP	GO:0034754	cellular hormone metabolic process	12/490	83/15707	9.62e-06	0.000143143	9.43e-05	18595/13082/13653/20750/50781/22417/230857/12904/20148/99929/12846/19662	12	12	Suppressed	-0.14624	-0.453051	0.984238	1	0.960721	20	tags=25%, list=4%, signal=25%	Dkk3/Wnt4/Pdgfra
TM_pom_BP_GO:0072028	TM_pom	BP	GO:0072028	nephron morphogenesis	11/490	70/15707	9.98e-06	0.000148089	9.76e-05	271127/14734/22420/12705/18654/329628/12159/22417/20682/15205/12043	11	11	Suppressed	-0.323616	-0.972243	0.490507	0.80644	0.774764	72	tags=36%, list=14%, signal=32%	Wnt4/Adamts16/Cited1/Wnt6
TM_pom_BP_GO:0030850	TM_pom	BP	GO:0030850	prostate gland development	9/490	46/15707	1.02e-05	0.000151517	9.99e-05	16000/20317/22418/12159/20682/11835/16001/240725/20377	9	9	Suppressed	-0.419813	-1.18514	0.276037	0.702575	0.674979	5	tags=22%, list=1%, signal=22%	Wnt5a/Igf1
TM_pom_BP_GO:0035150	TM_pom	BP	GO:0035150	regulation of tube size	16/490	144/15707	1.1e-05	0.00015749	0.000103788	98660/11475/19735/13616/242202/12845/13649/15894/14609/67972/16598/19091/14062/14042/11816/230857	16	16	Suppressed	-0.302491	-1.03055	0.423641	0.766778	0.73666	42	tags=19%, list=8%, signal=18%	Rgs2/Edn3/Atp1a2
TM_pom_BP_GO:0035296	TM_pom	BP	GO:0035296	regulation of tube diameter	16/490	144/15707	1.1e-05	0.00015749	0.000103788	98660/11475/19735/13616/242202/12845/13649/15894/14609/67972/16598/19091/14062/14042/11816/230857	16	16	Suppressed	-0.302491	-1.03055	0.423641	0.766778	0.73666	42	tags=19%, list=8%, signal=18%	Rgs2/Edn3/Atp1a2
TM_pom_BP_GO:0097746	TM_pom	BP	GO:0097746	blood vessel diameter maintenance	16/490	144/15707	1.1e-05	0.00015749	0.000103788	98660/11475/19735/13616/242202/12845/13649/15894/14609/67972/16598/19091/14062/14042/11816/230857	16	16	Suppressed	-0.302491	-1.03055	0.423641	0.766778	0.73666	42	tags=19%, list=8%, signal=18%	Rgs2/Edn3/Atp1a2
TM_pom_BP_GO:1904019	TM_pom	BP	GO:1904019	epithelial cell apoptotic process	14/490	113/15707	1.11e-05	0.000158576	0.000104504	16000/56312/17242/21825/11600/14456/12822/68169/15894/12159/18569/16001/21416/12192	14	14	Suppressed	-0.341332	-1.11161	0.33476	0.723129	0.694726	9	tags=21%, list=2%, signal=22%	Ndnf/Nupr1/Igf1
TM_pom_BP_GO:0031960	TM_pom	BP	GO:0031960	response to corticosteroid	11/490	71/15707	1.15e-05	0.000162297	0.000106956	11647/12193/12159/20393/18708/11898/74747/12192/11826/12043/11670	11	11	Suppressed	-0.17213	-0.517133	0.962922	0.998572	0.95935	23	tags=64%, list=4%, signal=62%	Bcl2/Ass1/Ddit4/Aqp1/Zfp36l1/Bmp4/Aldh3a1
TM_pom_BP_GO:1902003	TM_pom	BP	GO:1902003	regulation of amyloid-beta formation	8/490	36/15707	1.19e-05	0.000165151	0.000108837	16000/12759/18212/233744/104001/20660/11816/56177	8	8	Suppressed	-0.481431	-1.30499	0.186052	0.661916	0.635917	41	tags=38%, list=8%, signal=35%	Spon1/Ntrk2/Igf1
TM_pom_BP_GO:0050769	TM_pom	BP	GO:0050769	positive regulation of neurogenesis	23/490	268/15707	1.19e-05	0.000165507	0.000109072	20720/16000/18606/19242/20317/17242/18212/19266/15902/21844/20315/13649/24136/20393/20666/15205/22352/18213/11816/22341/18205/12904/20482	23	23	Suppressed	-0.437907	-1.6667	0.022638	0.552413	0.530715	18	tags=17%, list=4%, signal=18%	Ntrk2/Igf1/Enpp2/Ptn
TM_pom_BP_GO:0072170	TM_pom	BP	GO:0072170	metanephric tubule development	6/490	18/15707	1.21e-05	0.000166182	0.000109516	211401/329628/22417/20682/15205/11826	6	6	Suppressed	-0.29196	-0.711431	0.804868	0.948922	0.91165	87	tags=83%, list=17%, signal=70%	Sox9/Hes1/Aqp1/Mtss1/Wnt4
TM_pom_BP_GO:0051962	TM_pom	BP	GO:0051962	positive regulation of nervous system development	26/490	326/15707	1.21e-05	0.000166603	0.000109794	20720/16000/18606/19242/20317/17242/18212/19266/15902/21844/20315/13649/396184/24136/20393/20666/18708/15205/22352/18213/11816/22341/18205/12904/20482/68792	26	26	Suppressed	-0.409369	-1.61704	0.0284581	0.552413	0.530715	18	tags=15%, list=4%, signal=16%	Ntrk2/Igf1/Enpp2/Ptn
TM_pom_BP_GO:0042596	TM_pom	BP	GO:0042596	fear response	9/490	47/15707	1.23e-05	0.000168347	0.000110943	98660/17242/13167/14609/72585/17260/14042/11816/12043	9	9	Suppressed	-0.297996	-0.841251	0.642763	0.869334	0.835187	6	tags=33%, list=1%, signal=34%	Gja1/Mef2c/Atp1a2
TM_pom_BP_GO:1904036	TM_pom	BP	GO:1904036	negative regulation of epithelial cell apoptotic process	9/490	47/15707	1.23e-05	0.000168347	0.000110943	16000/56312/17242/11600/14456/68169/15894/16001/21416	9	9	Suppressed	-0.457421	-1.29131	0.189982	0.662755	0.636722	51	tags=33%, list=10%, signal=31%	Ndnf/Nupr1/Igf1
TM_pom_BP_GO:0060324	TM_pom	BP	GO:0060324	face development	10/490	59/15707	1.27e-05	0.000171635	0.00011311	18595/21809/21808/16974/22418/78892/21416/17701/99929/12842	10	10	Suppressed	-0.445463	-1.30541	0.171612	0.659727	0.633814	86	tags=50%, list=17%, signal=42%	Tgfb2/Crispld2/Wnt5a/Col1a1/Pdgfra
TM_pom_BP_GO:0014068	TM_pom	BP	GO:0014068	positive regulation of phosphatidylinositol 3-kinase signaling	11/490	72/15707	1.32e-05	0.000177283	0.000116832	16000/13179/11600/18212/17926/15234/21808/14062/20682/16001/18213	11	11	Suppressed	-0.38364	-1.15258	0.299084	0.710266	0.682368	90	tags=45%, list=18%, signal=38%	Hgf/Tgfb2/Dcn/Ntrk2/Igf1
TM_pom_BP_GO:0014031	TM_pom	BP	GO:0014031	mesenchymal cell development	12/490	86/15707	1.39e-05	0.000185944	0.00012254	13082/13616/20348/17311/12159/24136/18187/20666/18741/20682/15205/12043	12	12	Suppressed	-0.227682	-0.705355	0.813781	0.951224	0.913861	113	tags=33%, list=22%, signal=27%	Zeb2/Kitl/Sema3c/Edn3
TM_pom_BP_GO:0060993	TM_pom	BP	GO:0060993	kidney morphogenesis	12/490	86/15707	1.39e-05	0.000185944	0.00012254	271127/14734/22420/12705/18654/329628/12159/22417/20682/15205/12043/20677	12	12	Suppressed	-0.30769	-0.953219	0.513398	0.814735	0.782733	72	tags=33%, list=14%, signal=29%	Wnt4/Adamts16/Cited1/Wnt6
TM_pom_BP_GO:0110110	TM_pom	BP	GO:0110110	positive regulation of animal organ morphogenesis	8/490	37/15707	1.47e-05	0.000195858	0.000129073	22418/12159/22417/12490/22411/20682/11835/24063	8	8	Suppressed	-0.512398	-1.38893	0.126804	0.659727	0.633814	175	tags=75%, list=34%, signal=50%	Spry1/Bmp4/Wnt11/Wnt5a/Wnt4/Cd34
TM_pom_BP_GO:0007519	TM_pom	BP	GO:0007519	skeletal muscle tissue development	17/490	165/15707	1.61e-05	0.00021156	0.000139421	56312/13717/225115/16002/17904/13653/17263/208727/22634/20666/18741/17260/21416/12043/53620/20482/15370	17	17	Suppressed	-0.174183	-0.606356	0.912965	0.987121	0.948348	9	tags=6%, list=2%, signal=6%	Nupr1
TM_pom_BP_GO:0019932	TM_pom	BP	GO:0019932	second-messenger-mediated signaling	23/490	273/15707	1.61e-05	0.00021156	0.000139421	16000/19762/21825/18212/17748/19735/14683/17750/13616/68169/242202/13649/14745/19091/208727/20682/12289/11816/17967/11826/13400/230857/19084	23	23	Suppressed	-0.497306	-1.89278	0.004158	0.506547	0.48665	51	tags=35%, list=10%, signal=33%	Ndnf/Rit2/Mt2/Rgs2/Edn3/Mt1/Ntrk2/Igf1
TM_pom_BP_GO:0031099	TM_pom	BP	GO:0031099	regeneration	15/490	133/15707	1.72e-05	0.000222552	0.000146665	16000/19242/17242/20315/15234/13649/14609/12608/16779/16600/18133/16001/18007/18213/12043	15	15	Suppressed	-0.478887	-1.59797	0.040045	0.552413	0.530715	5	tags=20%, list=1%, signal=20%	Cebpb/Igf1/Ptn
TM_pom_BP_GO:0043154	TM_pom	BP	GO:0043154	negative regulation of cysteine-type endopeptidase activity involved in apoptotic process	11/490	74/15707	1.72e-05	0.000222552	0.000146665	16000/21825/20319/12955/14456/13479/15234/59009/16600/11826/15370	11	11	Suppressed	-0.30663	-0.921211	0.56042	0.830258	0.797647	30	tags=18%, list=6%, signal=17%	Dpep1/Igf1
TM_pom_BP_GO:0060395	TM_pom	BP	GO:0060395	SMAD protein signal transduction	11/490	74/15707	1.72e-05	0.000222552	0.000146665	12705/21809/110075/14560/21808/17263/12159/18133/20742/22352/50791	11	11	Suppressed	-0.269657	-0.810133	0.694438	0.902621	0.867167	99	tags=36%, list=19%, signal=30%	Vim/Tgfb2/Bmp3/Cited1
TM_pom_BP_GO:0035148	TM_pom	BP	GO:0035148	tube formation	17/490	166/15707	1.74e-05	0.000224421	0.000147897	22420/20319/14362/21808/21817/16974/22418/12159/22417/16911/24136/20666/20682/22323/50768/20377/20677	17	17	Suppressed	-0.191986	-0.668329	0.859301	0.962643	0.924832	113	tags=35%, list=22%, signal=28%	Zeb2/Tgm2/Tgfb2/Wnt5a/Wnt4/Wnt6
TM_pom_BP_GO:0043406	TM_pom	BP	GO:0043406	positive regulation of MAP kinase activity	19/490	201/15707	1.79e-05	0.000229302	0.000151114	16000/21825/21809/70097/16012/13616/21844/15234/242202/268373/17311/13649/13197/22418/14745/24136/17873/18213/18205	19	19	Suppressed	-0.327508	-1.18262	0.256323	0.69835	0.67092	113	tags=42%, list=22%, signal=34%	Zeb2/Kitl/Hgf/Wnt5a/Sash1/Gadd45a/Edn3/Igf1
TM_pom_BP_GO:0061037	TM_pom	BP	GO:0061037	negative regulation of cartilage development	7/490	28/15707	1.85e-05	0.00023548	0.000155185	21808/12159/16998/20682/76566/218772/13038	7	7	Suppressed	-0.219802	-0.567278	0.937391	0.995394	0.956297	402	tags=86%, list=79%, signal=19%	Ctsk/Rflnb/Sox9/Rarb/Bmp4/Tgfb2
TM_pom_BP_GO:0051147	TM_pom	BP	GO:0051147	regulation of muscle cell differentiation	15/490	134/15707	1.89e-05	0.000239409	0.000157774	16000/19735/15902/16002/13642/12159/208727/19241/18569/18133/17260/17701/21833/13400/12043	15	15	Suppressed	-0.320223	-1.06854	0.381552	0.745952	0.716652	42	tags=47%, list=8%, signal=44%	Hdac4/Tmsb4x/Bmp4/Efnb2/Mef2c/Rgs2/Igf1
TM_pom_BP_GO:0022604	TM_pom	BP	GO:0022604	regulation of cell morphogenesis	25/490	317/15707	2.15e-05	0.000270398	0.000178196	18606/19242/80883/17242/17926/19266/21844/19684/14114/15894/22418/77579/68010/14745/218952/20393/50706/107351/11852/24066/58804/17886/13822/260409/50768	25	25	Suppressed	-0.358296	-1.39701	0.105141	0.649204	0.623704	13	tags=12%, list=3%, signal=12%	Ntng1/Enpp2/Ptn
TM_pom_BP_GO:0055001	TM_pom	BP	GO:0055001	muscle cell development	18/490	186/15707	2.16e-05	0.000270398	0.000178196	16000/18595/19735/12845/77579/12159/11465/19091/208727/21386/16948/18741/15205/17260/13008/12043/19084/13007	18	18	Suppressed	-0.351634	-1.24658	0.201312	0.6735	0.647046	108	tags=56%, list=21%, signal=45%	Hdac4/Tbx3/Bmp4/Actg1/Mef2c/Csrp1/Csrp2/Rgs2/Pdgfra/Igf1
TM_pom_BP_GO:0048806	TM_pom	BP	GO:0048806	genitalia development	8/490	39/15707	2.22e-05	0.000275	0.000181229	18595/14238/16974/22418/21386/11835/21416/19662	8	8	Suppressed	-0.235996	-0.639705	0.876694	0.970062	0.931959	81	tags=25%, list=16%, signal=21%	Wnt5a/Pdgfra
TM_pom_BP_GO:0048566	TM_pom	BP	GO:0048566	embryonic digestive tract development	7/490	29/15707	2.37e-05	0.000290501	0.000191444	18595/15902/14238/20666/18741/21416/218772	7	7	Suppressed	-0.27387	-0.706821	0.803043	0.947972	0.910737	20	tags=14%, list=4%, signal=14%	Pdgfra
TM_pom_BP_GO:0045598	TM_pom	BP	GO:0045598	regulation of fat cell differentiation	15/490	139/15707	2.92e-05	0.000349882	0.000230578	16000/74186/15902/20319/12193/16974/22418/12608/70717/218952/15205/81703/21416/12192/20377	15	15	Suppressed	-0.232224	-0.774899	0.738808	0.918063	0.882003	5	tags=20%, list=1%, signal=20%	Wnt5a/Cebpb/Igf1
TM_pom_BP_GO:0048593	TM_pom	BP	GO:0048593	camera-type eye morphogenesis	15/490	139/15707	2.92e-05	0.000349882	0.000230578	19242/18212/12837/329941/14184/14238/16974/12159/21385/23965/20666/18741/20682/11826/19662	15	15	Suppressed	-0.381002	-1.27135	0.186952	0.661916	0.635917	18	tags=13%, list=4%, signal=13%	Ntrk2/Ptn
TM_pom_BP_GO:0046886	TM_pom	BP	GO:0046886	positive regulation of hormone biosynthetic process	5/490	13/15707	3.03e-05	0.000360573	0.000237623	16000/16002/13653/22417/16001	5	5	Suppressed	-0.580697	-1.32903	0.168975	0.659727	0.633814	72	tags=40%, list=14%, signal=35%	Wnt4/Igf1
TM_pom_BP_GO:0061307	TM_pom	BP	GO:0061307	cardiac neural crest cell differentiation involved in heart development	5/490	13/15707	3.03e-05	0.000360573	0.000237623	20348/16974/12159/18741/15205	5	5	Suppressed	-0.230769	-0.528157	0.96058	0.998379	0.959164	396	tags=80%, list=77%, signal=18%	Pitx2/Hes1/Bmp4/Sema3c
TM_pom_BP_GO:0034446	TM_pom	BP	GO:0034446	substrate adhesion-dependent cell spreading	13/490	108/15707	3.12e-05	0.000370809	0.000244369	18606/80883/17242/16777/17926/226255/14114/218952/16779/50706/107351/24066/20377	13	13	Suppressed	-0.405897	-1.29537	0.177264	0.661916	0.635917	27	tags=23%, list=5%, signal=22%	Lamb1/Ntng1/Enpp2
TM_pom_BP_GO:0060538	TM_pom	BP	GO:0060538	skeletal muscle organ development	17/490	174/15707	3.21e-05	0.000380687	0.000250878	56312/13717/225115/16002/17904/13653/17263/208727/22634/20666/18741/17260/21416/12043/53620/20482/15370	17	17	Suppressed	-0.174183	-0.606356	0.912965	0.987121	0.948348	9	tags=6%, list=2%, signal=6%	Nupr1
TM_pom_BP_GO:0010656	TM_pom	BP	GO:0010656	negative regulation of muscle cell apoptotic process	9/490	53/15707	3.4e-05	0.000400324	0.000263819	16000/56312/17242/20319/16974/18708/16001/15481/12043	9	9	Suppressed	-0.467034	-1.31845	0.172771	0.659727	0.633814	9	tags=22%, list=2%, signal=22%	Nupr1/Igf1
TM_pom_BP_GO:0006936	TM_pom	BP	GO:0006936	muscle contraction	22/490	267/15707	3.45e-05	0.000404052	0.000266276	98660/14219/12293/11475/19735/107589/13616/17904/242202/12845/109624/67972/21385/19091/208727/54598/14062/20266/21386/12289/240725/13400	22	22	Suppressed	-0.278932	-1.05286	0.394575	0.753641	0.724039	42	tags=18%, list=8%, signal=17%	Rgs2/Edn3/Cacna2d1/Atp1a2
TM_pom_BP_GO:0010657	TM_pom	BP	GO:0010657	muscle cell apoptotic process	12/490	94/15707	3.48e-05	0.000404319	0.000266452	16000/56312/68655/17242/20319/16974/18708/18569/16001/15481/13400/12043	12	12	Suppressed	-0.378004	-1.17105	0.276965	0.702575	0.674979	9	tags=17%, list=2%, signal=17%	Nupr1/Igf1
TM_pom_BP_GO:0050900	TM_pom	BP	GO:0050900	leukocyte migration	25/490	327/15707	3.61e-05	0.00041686	0.000274716	19242/17242/20496/21825/13601/19252/13616/17470/14456/13479/20315/268373/17965/20750/18654/17311/15894/22418/12490/15945/16803/14825/18133/14042/22341	25	25	Suppressed	-0.342184	-1.33419	0.136776	0.659727	0.633814	58	tags=32%, list=11%, signal=30%	Dusp1/Cxcl1/Nbl1/Ecm1/Edn3/Dpep1/Cd34/Ptn
TM_pom_BP_GO:2000117	TM_pom	BP	GO:2000117	negative regulation of cysteine-type endopeptidase activity	11/490	80/15707	3.65e-05	0.000419093	0.000276188	16000/21825/20319/12955/14456/13479/15234/59009/16600/11826/15370	11	11	Suppressed	-0.30663	-0.921211	0.56042	0.830258	0.797647	30	tags=18%, list=6%, signal=17%	Dpep1/Igf1
TM_pom_BP_GO:0014902	TM_pom	BP	GO:0014902	myotube differentiation	13/490	110/15707	3.8e-05	0.000430565	0.000283749	16000/20315/15945/30963/66860/208727/18741/18133/18007/21833/17886/13400/12043	13	13	Suppressed	-0.323097	-1.03113	0.425298	0.768778	0.738582	5	tags=85%, list=1%, signal=86%	Neo1/Ccn3/Thra/Pitx2/Myh9/Dmpk/Bcl2/Hacd1/Hdac4/Tanc1/Igf1
TM_pom_BP_GO:0001101	TM_pom	BP	GO:0001101	response to acid chemical	12/490	95/15707	3.87e-05	0.000435185	0.000286793	18212/18595/13649/14658/12608/16598/12832/16001/107581/12043/12843/12842	12	12	Suppressed	-0.550841	-1.7065	0.0252195	0.552413	0.530715	60	tags=50%, list=12%, signal=45%	Col1a2/Cebpb/Col1a1/Col5a2/Pdgfra/Ntrk2
TM_pom_BP_GO:0046849	TM_pom	BP	GO:0046849	bone remodeling	12/490	95/15707	3.87e-05	0.000435185	0.000286793	19242/17242/83924/14184/20750/13649/14609/16974/16998/14042/20377/13038	12	12	Suppressed	-0.34675	-1.07423	0.382121	0.746292	0.716979	2	tags=17%, list=0%, signal=17%	Gja1/Ptn
TM_pom_BP_GO:0150116	TM_pom	BP	GO:0150116	regulation of cell-substrate junction organization	10/490	67/15707	4.01e-05	0.000448301	0.000295437	18606/17926/14758/22417/11465/218952/18708/11856/107581/50768	10	10	Suppressed	-0.32952	-0.965647	0.500443	0.807896	0.776163	3	tags=50%, list=1%, signal=51%	Fermt2/Actg1/Gpm6b/Wnt4/Enpp2
TM_pom_BP_GO:0014032	TM_pom	BP	GO:0014032	neural crest cell development	11/490	81/15707	4.11e-05	0.000458579	0.00030221	13082/13616/20348/17311/12159/24136/18187/20666/18741/20682/15205	11	11	Suppressed	-0.25063	-0.752971	0.761894	0.92568	0.889321	113	tags=36%, list=22%, signal=29%	Zeb2/Kitl/Sema3c/Edn3
TM_pom_BP_GO:0014009	TM_pom	BP	GO:0014009	glial cell proliferation	9/490	55/15707	4.61e-05	0.000501428	0.000330448	16000/19242/12759/13167/13649/20666/15205/22352/20677	9	9	Suppressed	-0.557125	-1.57278	0.0529568	0.569942	0.547556	5	tags=33%, list=1%, signal=34%	Vim/Igf1/Ptn
TM_pom_BP_GO:0045216	TM_pom	BP	GO:0045216	cell-cell junction organization	17/490	179/15707	4.61e-05	0.000501428	0.000330448	12741/21809/211401/21808/19684/13642/14609/21872/11465/218952/11461/14062/12385/22411/64817/77446/14042	17	17	Suppressed	-0.331875	-1.1553	0.282751	0.703603	0.675966	164	tags=59%, list=32%, signal=41%	Wnt11/Efnb2/Fermt2/Actg1/Gja1/Actb/Tjp1/Mtss1/Tgfb2/Cldn5
TM_pom_BP_GO:0050435	TM_pom	BP	GO:0050435	amyloid-beta metabolic process	9/490	55/15707	4.61e-05	0.000501428	0.000330448	16000/12759/18212/233744/104001/56175/20660/11816/56177	9	9	Suppressed	-0.457824	-1.29245	0.188658	0.661916	0.635917	41	tags=33%, list=8%, signal=31%	Spon1/Ntrk2/Igf1
TM_pom_BP_GO:0050807	TM_pom	BP	GO:0050807	regulation of synapse organization	21/490	253/15707	4.65e-05	0.000503962	0.000332118	19242/18212/13602/19266/21844/14362/22418/396184/77579/23888/17999/18187/66860/18708/17260/15481/18213/11816/50791/13400/68792	21	21	Suppressed	-0.391125	-1.45314	0.08187	0.624461	0.599933	18	tags=14%, list=4%, signal=14%	Ntrk2/Sparcl1/Ptn
TM_pom_BP_GO:0035850	TM_pom	BP	GO:0035850	epithelial cell differentiation involved in kidney development	7/490	32/15707	4.71e-05	0.000509141	0.000335531	12705/211401/329628/12159/16779/17260/14042	7	7	Suppressed	-0.385281	-0.994355	0.462826	0.792824	0.761683	108	tags=86%, list=21%, signal=69%	Lamb2/Ext1/Bmp4/Mef2c/Mtss1/Cited1
TM_pom_BP_GO:0042552	TM_pom	BP	GO:0042552	myelination	15/490	145/15707	4.8e-05	0.000517953	0.000341338	16000/19242/12759/12741/18212/17926/218442/14184/15234/103743/17988/21416/18213/18205/218772	15	15	Suppressed	-0.485548	-1.6202	0.0355456	0.552413	0.530715	18	tags=27%, list=4%, signal=27%	Ntrk2/Cldn5/Igf1/Ptn
TM_pom_BP_GO:0021537	TM_pom	BP	GO:0021537	telencephalon development	19/490	217/15707	5.17e-05	0.000554962	0.000365728	98660/17242/16777/18212/15902/13167/20315/13649/329628/16974/22418/77579/12159/24136/15205/14042/218772/11826/319565	19	19	Suppressed	-0.281468	-1.01637	0.431533	0.775891	0.745415	27	tags=16%, list=5%, signal=16%	Lamb1/Ntrk2/Atp1a2
TM_pom_BP_GO:0150115	TM_pom	BP	GO:0150115	cell-substrate junction organization	12/490	98/15707	5.28e-05	0.000565855	0.000372907	18606/17926/14758/22417/11465/218952/18708/13518/11856/107581/50768/12043	12	12	Suppressed	-0.308349	-0.955261	0.511596	0.814735	0.782733	3	tags=42%, list=1%, signal=42%	Fermt2/Actg1/Gpm6b/Wnt4/Enpp2
TM_pom_BP_GO:0001662	TM_pom	BP	GO:0001662	behavioral fear response	8/490	44/15707	5.58e-05	0.000593817	0.000391334	98660/17242/13167/14609/72585/17260/11816/12043	8	8	Suppressed	-0.312765	-0.847799	0.635549	0.865937	0.831924	6	tags=38%, list=1%, signal=38%	Gja1/Mef2c/Atp1a2
TM_pom_BP_GO:0048713	TM_pom	BP	GO:0048713	regulation of oligodendrocyte differentiation	8/490	44/15707	5.58e-05	0.000593817	0.000391334	18606/19242/17242/15902/12159/103743/15205/21416	8	8	Suppressed	-0.669018	-1.81348	0.00918233	0.506547	0.48665	3	tags=25%, list=1%, signal=25%	Enpp2/Ptn
TM_pom_BP_GO:1902991	TM_pom	BP	GO:1902991	regulation of amyloid precursor protein catabolic process	8/490	44/15707	5.58e-05	0.000593817	0.000391334	16000/12759/18212/233744/104001/20660/11816/56177	8	8	Suppressed	-0.481431	-1.30499	0.186052	0.661916	0.635917	41	tags=38%, list=8%, signal=35%	Spon1/Ntrk2/Igf1
TM_pom_BP_GO:0007272	TM_pom	BP	GO:0007272	ensheathment of neurons	15/490	147/15707	5.63e-05	0.000595767	0.000392619	16000/19242/12759/12741/18212/17926/218442/14184/15234/103743/17988/21416/18213/18205/218772	15	15	Suppressed	-0.485548	-1.6202	0.0355456	0.552413	0.530715	18	tags=27%, list=4%, signal=27%	Ntrk2/Cldn5/Igf1/Ptn
TM_pom_BP_GO:0008366	TM_pom	BP	GO:0008366	axon ensheathment	15/490	147/15707	5.63e-05	0.000595767	0.000392619	16000/19242/12759/12741/18212/17926/218442/14184/15234/103743/17988/21416/18213/18205/218772	15	15	Suppressed	-0.485548	-1.6202	0.0355456	0.552413	0.530715	18	tags=27%, list=4%, signal=27%	Ntrk2/Cldn5/Igf1/Ptn
TM_pom_BP_GO:0032148	TM_pom	BP	GO:0032148	activation of protein kinase B activity	6/490	23/15707	5.74e-05	0.00060461	0.000398447	16000/14456/268373/22418/18213/18205	6	6	Suppressed	-0.524709	-1.27858	0.202886	0.6735	0.647046	5	tags=33%, list=1%, signal=33%	Wnt5a/Igf1
TM_pom_BP_GO:0034405	TM_pom	BP	GO:0034405	response to fluid shear stress	6/490	23/15707	5.74e-05	0.00060461	0.000398447	211401/20750/16598/16600/17260/11898	6	6	Suppressed	-0.327266	-0.797462	0.699117	0.904778	0.869239	134	tags=50%, list=26%, signal=37%	Klf4/Mef2c/Mtss1
TM_pom_BP_GO:0048709	TM_pom	BP	GO:0048709	oligodendrocyte differentiation	12/490	99/15707	5.85e-05	0.000612803	0.000403846	18606/19242/12759/17242/18212/15902/14184/12159/103743/20682/15205/21416	12	12	Suppressed	-0.517915	-1.60449	0.0414321	0.555913	0.534078	18	tags=25%, list=4%, signal=25%	Ntrk2/Enpp2/Ptn
TM_pom_BP_GO:0010634	TM_pom	BP	GO:0010634	positive regulation of epithelial cell migration	15/490	148/15707	6.09e-05	0.000634968	0.000418453	16000/18606/21825/11600/67916/70097/16002/21808/22418/12159/20682/11852/22341/11826/68792	15	15	Suppressed	-0.405818	-1.35415	0.132958	0.659727	0.633814	5	tags=33%, list=1%, signal=34%	Tgfb2/Wnt5a/Sash1/Igf1/Enpp2
TM_pom_BP_GO:0043534	TM_pom	BP	GO:0043534	blood vessel endothelial cell migration	13/490	115/15707	6.08e-05	0.000634968	0.000418453	16000/21825/11600/16002/13642/13197/16600/17260/11816/22341/17886/15370/68792	13	13	Suppressed	-0.275245	-0.878412	0.607729	0.854129	0.82058	5	tags=15%, list=1%, signal=16%	Gadd45a/Igf1
TM_pom_BP_GO:1903522	TM_pom	BP	GO:1903522	regulation of blood circulation	19/490	220/15707	6.23e-05	0.000646742	0.000426212	98660/14219/12293/19735/13616/21808/242202/13649/15894/14609/67972/19091/208727/14062/20266/18708/12289/21833/13400	19	19	Suppressed	-0.317529	-1.14658	0.292322	0.7059	0.678173	42	tags=21%, list=8%, signal=20%	Rgs2/Edn3/Cacna2d1/Atp1a2
TM_pom_BP_GO:0050808	TM_pom	BP	GO:0050808	synapse organization	31/490	466/15707	6.42e-05	0.000664297	0.000437781	19242/80883/18212/13602/19266/246316/21844/14362/13642/14658/22418/396184/77579/23888/11461/17999/18187/66860/16779/14062/18708/17988/17260/16001/15481/18213/11816/50791/13400/103172/68792	31	31	Suppressed	-0.359042	-1.49139	0.0567459	0.587795	0.564707	18	tags=13%, list=4%, signal=13%	Ntrk2/Sparcl1/Ntng1/Ptn
TM_pom_BP_GO:0002209	TM_pom	BP	GO:0002209	behavioral defense response	8/490	45/15707	6.61e-05	0.000676942	0.000446114	98660/17242/13167/14609/72585/17260/11816/12043	8	8	Suppressed	-0.312765	-0.847799	0.635549	0.865937	0.831924	6	tags=38%, list=1%, signal=38%	Gja1/Mef2c/Atp1a2
TM_pom_BP_GO:0034205	TM_pom	BP	GO:0034205	amyloid-beta formation	8/490	45/15707	6.61e-05	0.000676942	0.000446114	16000/12759/18212/233744/104001/20660/11816/56177	8	8	Suppressed	-0.481431	-1.30499	0.186052	0.661916	0.635917	41	tags=38%, list=8%, signal=35%	Spon1/Ntrk2/Igf1
TM_pom_BP_GO:0002685	TM_pom	BP	GO:0002685	regulation of leukocyte migration	18/490	203/15707	6.88e-05	0.000696431	0.000458958	19242/17242/21825/13601/19252/13616/17470/14456/20315/17965/18654/17311/15894/22418/15945/16803/18133/22341	18	18	Suppressed	-0.298872	-1.05953	0.385659	0.751873	0.72234	58	tags=28%, list=11%, signal=26%	Dusp1/Nbl1/Ecm1/Edn3/Ptn
TM_pom_BP_GO:0050803	TM_pom	BP	GO:0050803	regulation of synapse structure or activity	21/490	260/15707	6.9e-05	0.000697476	0.000459646	19242/18212/13602/19266/21844/14362/22418/396184/77579/23888/17999/18187/66860/18708/17260/15481/18213/11816/50791/13400/68792	21	21	Suppressed	-0.391125	-1.45314	0.08187	0.624461	0.599933	18	tags=14%, list=4%, signal=14%	Ntrk2/Sparcl1/Ptn
TM_pom_BP_GO:0048730	TM_pom	BP	GO:0048730	epidermis morphogenesis	7/490	34/15707	7.13e-05	0.00071554	0.000471551	22409/16011/12394/21808/66042/16600/12043	7	7	Suppressed	-0.295804	-0.76343	0.739348	0.918063	0.882003	10	tags=43%, list=2%, signal=43%	Klf4/Tgfb2/Wnt10a
TM_pom_BP_GO:1905332	TM_pom	BP	GO:1905332	positive regulation of morphogenesis of an epithelium	7/490	34/15707	7.13e-05	0.00071554	0.000471551	17242/18595/14609/12159/22417/20682/11835	7	7	Suppressed	-0.299771	-0.773667	0.729565	0.914611	0.878686	165	tags=57%, list=32%, signal=39%	Bmp4/Gja1/Wnt4/Pdgfra
TM_pom_BP_GO:0048864	TM_pom	BP	GO:0048864	stem cell development	11/490	86/15707	7.2e-05	0.000719821	0.000474372	13082/13616/20348/17311/12159/24136/18187/20666/18741/20682/15205	11	11	Suppressed	-0.25063	-0.752971	0.761894	0.92568	0.889321	113	tags=36%, list=22%, signal=29%	Zeb2/Kitl/Sema3c/Edn3
TM_pom_BP_GO:0071902	TM_pom	BP	GO:0071902	positive regulation of protein serine/threonine kinase activity	21/490	261/15707	7.29e-05	0.000727117	0.00047918	16000/21825/21809/70097/16012/13616/21844/15234/242202/268373/17311/13649/13197/22418/14745/24136/218952/17873/12444/18213/18205	21	21	Suppressed	-0.294132	-1.09278	0.343672	0.725205	0.69672	113	tags=38%, list=22%, signal=31%	Zeb2/Kitl/Hgf/Wnt5a/Sash1/Gadd45a/Edn3/Igf1
TM_pom_BP_GO:0044342	TM_pom	BP	GO:0044342	type B pancreatic cell proliferation	6/490	24/15707	7.45e-05	0.000738042	0.00048638	56312/16011/16010/18133/20377/15370	6	6	Suppressed	-0.357319	-0.870692	0.612966	0.854458	0.820896	9	tags=17%, list=2%, signal=17%	Nupr1
TM_pom_BP_GO:0060563	TM_pom	BP	GO:0060563	neuroepithelial cell differentiation	6/490	24/15707	7.45e-05	0.000738042	0.00048638	12608/22417/20666/22411/15205/20677	6	6	Suppressed	-0.403162	-0.9824	0.475124	0.799278	0.767884	309	tags=100%, list=60%, signal=40%	Sox4/Hes1/Wnt11/Wnt4/Cebpb
TM_pom_BP_GO:0072012	TM_pom	BP	GO:0072012	glomerulus vasculature development	6/490	24/15707	7.45e-05	0.000738042	0.00048638	11600/18595/13653/12159/15205/11826	6	6	Suppressed	-0.286714	-0.698646	0.818221	0.951224	0.913861	20	tags=50%, list=4%, signal=49%	Aqp1/Bmp4/Pdgfra
TM_pom_BP_GO:0014015	TM_pom	BP	GO:0014015	positive regulation of gliogenesis	10/490	72/15707	7.53e-05	0.000742841	0.000489543	20720/16000/18606/19242/17242/15902/13649/15205/22352/18205	10	10	Suppressed	-0.614827	-1.80173	0.0143933	0.506547	0.48665	5	tags=30%, list=1%, signal=30%	Igf1/Enpp2/Ptn
TM_pom_BP_GO:0032103	TM_pom	BP	GO:0032103	positive regulation of response to external stimulus	26/490	363/15707	7.57e-05	0.000744977	0.00049095	19242/56312/17242/21825/70097/13616/14456/21844/20315/242202/18654/13649/21817/22418/12608/14745/15945/16803/14825/18569/16001/18035/18213/22341/18205/18783	26	26	Suppressed	-0.276607	-1.09262	0.342197	0.725205	0.69672	94	tags=31%, list=18%, signal=26%	Tgm2/Wnt5a/Sash1/Cebpb/Cxcl1/Edn3/Nupr1/Ptn
TM_pom_BP_GO:0014911	TM_pom	BP	GO:0014911	positive regulation of smooth muscle cell migration	9/490	59/15707	8.16e-05	0.000797191	0.00052536	16000/17242/16011/13653/14745/208727/19241/50706/12043	9	9	Suppressed	-0.38498	-1.08681	0.36474	0.73859	0.70958	5	tags=44%, list=1%, signal=45%	Hdac4/Tmsb4x/Lpar1/Igf1
TM_pom_BP_GO:1904705	TM_pom	BP	GO:1904705	regulation of vascular associated smooth muscle cell proliferation	9/490	59/15707	8.16e-05	0.000797191	0.00052536	16000/16011/21809/14609/106014/19091/15446/18569/17260	9	9	Suppressed	-0.35231	-0.99458	0.45962	0.791189	0.760112	5	tags=44%, list=1%, signal=45%	Gja1/Mef2c/Tafa5/Igf1
TM_pom_BP_GO:1990874	TM_pom	BP	GO:1990874	vascular associated smooth muscle cell proliferation	9/490	59/15707	8.16e-05	0.000797191	0.00052536	16000/16011/21809/14609/106014/19091/15446/18569/17260	9	9	Suppressed	-0.35231	-0.99458	0.45962	0.791189	0.760112	5	tags=44%, list=1%, signal=45%	Gja1/Mef2c/Tafa5/Igf1
TM_pom_BP_GO:0042982	TM_pom	BP	GO:0042982	amyloid precursor protein metabolic process	10/490	73/15707	8.49e-05	0.000826199	0.000544477	16000/12759/16432/18212/233744/104001/56175/20660/11816/56177	10	10	Suppressed	-0.427702	-1.25337	0.20992	0.676924	0.650335	41	tags=30%, list=8%, signal=28%	Spon1/Ntrk2/Igf1
TM_pom_BP_GO:0043954	TM_pom	BP	GO:0043954	cellular component maintenance	10/490	73/15707	8.49e-05	0.000826199	0.000544477	66961/211401/21872/218952/66860/14062/16001/15481/11816/103172	10	10	Suppressed	-0.353268	-1.03524	0.420505	0.766778	0.73666	289	tags=90%, list=56%, signal=40%	Igf1r/Apoe/Chchd10/Hspa8/Tanc1/Fermt2/Tjp1/Mtss1/Neat1
TM_pom_BP_GO:0010092	TM_pom	BP	GO:0010092	specification of animal organ identity	7/490	35/15707	8.67e-05	0.000842227	0.000555039	22418/12159/22411/11835/17260/14042/24063	7	7	Suppressed	-0.451558	-1.16541	0.293261	0.7059	0.678173	175	tags=71%, list=34%, signal=48%	Spry1/Bmp4/Wnt11/Mef2c/Wnt5a
TM_pom_BP_GO:0061437	TM_pom	BP	GO:0061437	renal system vasculature development	6/490	25/15707	9.55e-05	0.000903621	0.000595499	11600/18595/13653/12159/15205/11826	6	6	Suppressed	-0.286714	-0.698646	0.818221	0.951224	0.913861	20	tags=50%, list=4%, signal=49%	Aqp1/Bmp4/Pdgfra
TM_pom_BP_GO:0061440	TM_pom	BP	GO:0061440	kidney vasculature development	6/490	25/15707	9.55e-05	0.000903621	0.000595499	11600/18595/13653/12159/15205/11826	6	6	Suppressed	-0.286714	-0.698646	0.818221	0.951224	0.913861	20	tags=50%, list=4%, signal=49%	Aqp1/Bmp4/Pdgfra
TM_pom_BP_GO:0072273	TM_pom	BP	GO:0072273	metanephric nephron morphogenesis	5/490	16/15707	9.51e-05	0.000903621	0.000595499	12705/12159/22417/20682/15205	5	5	Suppressed	-0.501408	-1.14756	0.308118	0.713847	0.685808	72	tags=100%, list=14%, signal=87%	Hes1/Bmp4/Wnt4/Cited1
TM_pom_BP_GO:0001938	TM_pom	BP	GO:0001938	positive regulation of endothelial cell proliferation	11/490	89/15707	9.89e-05	0.000931717	0.000614015	16000/17242/13601/14184/16002/20315/18654/22418/12159/22341/15370	11	11	Suppressed	-0.321845	-0.966922	0.496985	0.806846	0.775154	37	tags=27%, list=7%, signal=26%	Wnt5a/Ecm1/Igf1
TM_pom_BP_GO:0010660	TM_pom	BP	GO:0010660	regulation of muscle cell apoptotic process	11/490	89/15707	9.89e-05	0.000931717	0.000614015	16000/56312/68655/17242/20319/16974/18708/18569/16001/15481/12043	11	11	Suppressed	-0.388305	-1.16659	0.282109	0.703603	0.675966	9	tags=18%, list=2%, signal=18%	Nupr1/Igf1
TM_pom_BP_GO:0031128	TM_pom	BP	GO:0031128	developmental induction	7/490	36/15707	0.000104824	0.000983496	0.000648138	22418/12159/22417/22411/20682/11835/24063	7	7	Suppressed	-0.45633	-1.17772	0.283913	0.703603	0.675966	175	tags=71%, list=34%, signal=48%	Spry1/Bmp4/Wnt11/Wnt5a/Wnt4
TM_pom_BP_GO:0014014	TM_pom	BP	GO:0014014	negative regulation of gliogenesis	8/490	48/15707	0.000106588	0.000993786	0.000654919	19242/15902/14184/12159/20666/103743/15205/18213	8	8	Suppressed	-0.520117	-1.40986	0.114779	0.655371	0.629629	2	tags=25%, list=0%, signal=25%	Bmp4/Ptn
TM_pom_BP_GO:2000243	TM_pom	BP	GO:2000243	positive regulation of reproductive process	10/490	75/15707	0.000107159	0.000994955	0.000655689	12394/18671/242202/22418/22417/208727/20682/11835/16001/17701	10	10	Suppressed	-0.263133	-0.771101	0.735607	0.916113	0.880129	81	tags=30%, list=16%, signal=26%	Wnt5a/Wnt4/Abcb1a
TM_pom_BP_GO:0048645	TM_pom	BP	GO:0048645	animal organ formation	9/490	62/15707	0.00012124	0.00110954	0.000731206	22418/12159/22411/15205/11835/17260/14042/240725/24063	9	9	Suppressed	-0.427854	-1.20784	0.257502	0.69835	0.67092	248	tags=89%, list=48%, signal=47%	Ext1/Hes1/Sulf1/Spry1/Bmp4/Wnt11/Mef2c/Wnt5a
TM_pom_BP_GO:0051153	TM_pom	BP	GO:0051153	regulation of striated muscle cell differentiation	11/490	91/15707	0.000121176	0.00110954	0.000731206	16000/19735/13642/12159/208727/18133/17260/17701/21833/13400/12043	11	11	Suppressed	-0.448421	-1.3472	0.139379	0.659727	0.633814	42	tags=100%, list=8%, signal=94%	Msx1/Thra/Dmpk/Bcl2/Hdac4/Bmp4/Efnb2/Mef2c/Rgs2/Igf1
TM_pom_BP_GO:0051893	TM_pom	BP	GO:0051893	regulation of focal adhesion assembly	9/490	62/15707	0.00012124	0.00110954	0.000731206	18606/17926/14758/22417/11465/218952/11856/107581/50768	9	9	Suppressed	-0.356788	-1.00722	0.445499	0.781103	0.750422	78	tags=56%, list=15%, signal=48%	Fermt2/Actg1/Gpm6b/Wnt4/Enpp2
TM_pom_BP_GO:0090109	TM_pom	BP	GO:0090109	regulation of cell-substrate junction assembly	9/490	62/15707	0.00012124	0.00110954	0.000731206	18606/17926/14758/22417/11465/218952/11856/107581/50768	9	9	Suppressed	-0.356788	-1.00722	0.445499	0.781103	0.750422	78	tags=56%, list=15%, signal=48%	Fermt2/Actg1/Gpm6b/Wnt4/Enpp2
TM_pom_BP_GO:2001237	TM_pom	BP	GO:2001237	negative regulation of extrinsic apoptotic signaling pathway	11/490	91/15707	0.000121176	0.00110954	0.000731206	16000/20319/15234/15894/14451/12159/59009/12385/11835/21416/12043	11	11	Suppressed	-0.321204	-0.964996	0.498995	0.806846	0.775154	5	tags=18%, list=1%, signal=18%	Hgf/Igf1
TM_pom_BP_GO:0001974	TM_pom	BP	GO:0001974	blood vessel remodeling	8/490	49/15707	0.000123955	0.00112976	0.00074453	16000/72780/21808/20348/14609/21817/17260/14042	8	8	Suppressed	-0.604795	-1.63939	0.0330127	0.552413	0.530715	128	tags=75%, list=25%, signal=57%	Gja1/Mef2c/Sema3c/Tgm2/Tgfb2/Igf1
TM_pom_BP_GO:0035272	TM_pom	BP	GO:0035272	exocrine system development	8/490	49/15707	0.000123955	0.00112976	0.00074453	16000/16002/15234/20348/13649/21817/20682/16001	8	8	Suppressed	-0.542013	-1.46921	0.0863577	0.636154	0.611167	96	tags=50%, list=19%, signal=41%	Sema3c/Tgm2/Hgf/Igf1
TM_pom_BP_GO:0003128	TM_pom	BP	GO:0003128	heart field specification	5/490	17/15707	0.000131248	0.00118176	0.000778795	22418/12159/22411/17260/14042	5	5	Suppressed	-0.555256	-1.2708	0.209461	0.676924	0.650335	165	tags=100%, list=32%, signal=68%	Bmp4/Wnt11/Mef2c/Wnt5a
TM_pom_BP_GO:0032352	TM_pom	BP	GO:0032352	positive regulation of hormone metabolic process	5/490	17/15707	0.000131248	0.00118176	0.000778795	16000/16002/13653/22417/16001	5	5	Suppressed	-0.580697	-1.32903	0.168975	0.659727	0.633814	72	tags=40%, list=14%, signal=35%	Wnt4/Igf1
TM_pom_BP_GO:0048557	TM_pom	BP	GO:0048557	embryonic digestive tract morphogenesis	5/490	17/15707	0.000131248	0.00118176	0.000778795	18595/15902/20666/18741/21416	5	5	Suppressed	-0.35558	-0.813809	0.684637	0.896407	0.861198	20	tags=80%, list=4%, signal=78%	Sox11/Pitx2/Tcf7l2/Pdgfra
TM_pom_BP_GO:0007044	TM_pom	BP	GO:0007044	cell-substrate junction assembly	11/490	92/15707	0.000133837	0.00120023	0.000790969	18606/17926/14758/22417/11465/218952/13518/11856/107581/50768/12043	11	11	Suppressed	-0.327725	-0.984589	0.475095	0.799278	0.767884	3	tags=45%, list=1%, signal=46%	Fermt2/Actg1/Gpm6b/Wnt4/Enpp2
TM_pom_BP_GO:0043200	TM_pom	BP	GO:0043200	response to amino acid	10/490	77/15707	0.000134146	0.0012006	0.000791211	18212/18595/13649/14658/12608/12832/16001/107581/12843/12842	10	10	Suppressed	-0.612797	-1.79578	0.0148361	0.506547	0.48665	60	tags=60%, list=12%, signal=54%	Col1a2/Cebpb/Col1a1/Col5a2/Pdgfra/Ntrk2
TM_pom_BP_GO:0007611	TM_pom	BP	GO:0007611	learning or memory	21/490	273/15707	0.000137786	0.0012258	0.000807818	16000/19242/98660/20317/17242/16777/18212/13167/16002/242202/13653/13649/20393/66860/17260/12444/11816/17967/18205/21833/12846	21	21	Suppressed	-0.514168	-1.91028	0.00524515	0.506547	0.48665	27	tags=24%, list=5%, signal=24%	Lamb1/Ntrk2/Atp1a2/Igf1/Ptn
TM_pom_BP_GO:0050931	TM_pom	BP	GO:0050931	pigment cell differentiation	7/490	38/15707	0.000150161	0.00131494	0.000866562	12705/13616/17311/24136/12512/17260/12043	7	7	Suppressed	-0.633369	-1.63464	0.0328261	0.552413	0.530715	113	tags=86%, list=22%, signal=68%	Cd63/Zeb2/Mef2c/Kitl/Edn3/Cited1
TM_pom_BP_GO:0046885	TM_pom	BP	GO:0046885	regulation of hormone biosynthetic process	6/490	27/15707	0.000151386	0.00132307	0.000871924	16000/16002/13653/50781/22417/16001	6	6	Suppressed	-0.518991	-1.26465	0.212793	0.678904	0.652237	118	tags=50%, list=23%, signal=39%	Dkk3/Wnt4/Igf1
TM_pom_BP_GO:0055078	TM_pom	BP	GO:0055078	sodium ion homeostasis	8/490	51/15707	0.000165724	0.00143435	0.000945258	98660/20496/20272/14683/20750/20393/14042/12846	8	8	Suppressed	-0.330503	-0.895881	0.578706	0.836368	0.803516	6	tags=25%, list=1%, signal=25%	Scn7a/Atp1a2
TM_pom_BP_GO:0002065	TM_pom	BP	GO:0002065	columnar/cuboidal epithelial cell differentiation	10/490	79/15707	0.000166655	0.00143962	0.00094873	22418/12159/12608/22417/20666/22411/15205/14042/218772/20677	10	10	Suppressed	-0.42635	-1.2494	0.213906	0.679085	0.652411	257	tags=90%, list=50%, signal=46%	Sox4/Ext1/Hes1/Rarb/Bmp4/Wnt11/Wnt5a/Wnt4/Cebpb
TM_pom_BP_GO:0003139	TM_pom	BP	GO:0003139	secondary heart field specification	4/490	10/15707	0.000169162	0.00145006	0.000955607	22418/12159/22411/17260	4	4	Suppressed	-0.685039	-1.44222	0.0969107	0.638055	0.612993	165	tags=100%, list=32%, signal=68%	Wnt11/Mef2c/Wnt5a
TM_pom_BP_GO:0003207	TM_pom	BP	GO:0003207	cardiac chamber formation	4/490	10/15707	0.000169162	0.00145006	0.000955607	21385/20666/17260/20677	4	4	Suppressed	-0.401575	-0.845442	0.659966	0.879592	0.845043	309	tags=100%, list=60%, signal=40%	Sox4/Tbx2/Mef2c
TM_pom_BP_GO:1905939	TM_pom	BP	GO:1905939	regulation of gonad development	4/490	10/15707	0.000169162	0.00145006	0.000955607	56312/12394/22417/20682	4	4	Suppressed	-0.579797	-1.22066	0.245874	0.698266	0.670839	72	tags=50%, list=14%, signal=43%	Wnt4/Nupr1
TM_pom_BP_GO:0046697	TM_pom	BP	GO:0046697	decidualization	5/490	18/15707	0.00017709	0.00150073	0.000989004	19242/19223/16157/18783/67971	5	5	Suppressed	-0.56943	-1.30324	0.187939	0.661916	0.635917	2	tags=40%, list=0%, signal=40%	Tppp3/Ptn
TM_pom_BP_GO:0050810	TM_pom	BP	GO:0050810	regulation of steroid biosynthetic process	9/490	65/15707	0.000175886	0.00150073	0.000989004	16000/29817/16002/13653/50781/22417/19091/16001/11816	9	9	Suppressed	-0.419899	-1.18539	0.275816	0.702575	0.674979	5	tags=33%, list=1%, signal=34%	Dkk3/Wnt4/Igf1
TM_pom_BP_GO:0072202	TM_pom	BP	GO:0072202	cell differentiation involved in metanephros development	5/490	18/15707	0.00017709	0.00150073	0.000989004	12705/329628/12159/22417/16779	5	5	Suppressed	-0.447632	-1.02449	0.428511	0.773204	0.742834	72	tags=60%, list=14%, signal=52%	Bmp4/Wnt4/Cited1
TM_pom_BP_GO:0060135	TM_pom	BP	GO:0060135	maternal process involved in female pregnancy	7/490	39/15707	0.000178146	0.00150682	0.000993013	19242/19223/16157/22417/11835/18783/67971	7	7	Suppressed	-0.544809	-1.40608	0.117826	0.658069	0.632221	72	tags=43%, list=14%, signal=37%	Wnt4/Tppp3/Ptn
TM_pom_BP_GO:0003148	TM_pom	BP	GO:0003148	outflow tract septum morphogenesis	6/490	28/15707	0.00018764	0.00157223	0.00103612	21808/20348/12159/21385/18187/218772	6	6	Suppressed	-0.427498	-1.0417	0.407495	0.760973	0.731083	213	tags=83%, list=42%, signal=49%	Rarb/Bmp4/Tbx2/Sema3c/Tgfb2
TM_pom_BP_GO:0003156	TM_pom	BP	GO:0003156	regulation of animal organ formation	6/490	28/15707	0.00018764	0.00157223	0.00103612	22418/12159/22411/11835/240725/24063	6	6	Suppressed	-0.424901	-1.03537	0.414603	0.766083	0.735992	298	tags=83%, list=58%, signal=35%	Sulf1/Spry1/Bmp4/Wnt11/Wnt5a
TM_pom_BP_GO:0030318	TM_pom	BP	GO:0030318	melanocyte differentiation	6/490	28/15707	0.00018764	0.00157223	0.00103612	12705/13616/17311/24136/17260/12043	6	6	Suppressed	-0.716292	-1.74542	0.0118458	0.506547	0.48665	113	tags=83%, list=22%, signal=66%	Zeb2/Mef2c/Kitl/Edn3/Cited1
TM_pom_BP_GO:0051591	TM_pom	BP	GO:0051591	response to cAMP	8/490	52/15707	0.000190587	0.00159394	0.00105043	16011/12705/18708/12916/12192/11826/14148/11670	8	8	Suppressed	-0.356927	-0.967505	0.494316	0.806846	0.775154	31	tags=75%, list=6%, signal=72%	Crem/Aqp1/Zfp36l1/Fdx1/Cited1/Aldh3a1
TM_pom_BP_GO:0008016	TM_pom	BP	GO:0008016	regulation of heart contraction	15/490	164/15707	0.000193982	0.00161628	0.00106515	98660/14219/12293/19735/13616/21808/242202/14609/19091/208727/20266/18708/12289/21833/13400	15	15	Suppressed	-0.388064	-1.29491	0.171654	0.659727	0.633814	42	tags=27%, list=8%, signal=25%	Rgs2/Edn3/Cacna2d1/Atp1a2
TM_pom_BP_GO:0048511	TM_pom	BP	GO:0048511	rhythmic process	20/490	261/15707	0.000207891	0.00172253	0.00113517	16000/18606/19242/17242/18212/18595/59027/15902/12394/13653/13649/19091/20893/12916/16001/11898/18213/268903/18783/15903	20	20	Suppressed	-0.632926	-2.32047	0.000229516	0.34829	0.33461	22	tags=30%, list=4%, signal=30%	Nampt/Pdgfra/Ntrk2/Igf1/Enpp2/Ptn
TM_pom_BP_GO:0038084	TM_pom	BP	GO:0038084	vascular endothelial growth factor signaling pathway	7/490	40/15707	0.000210199	0.00173201	0.00114142	13179/18595/21413/18654/12512/18187/22341	7	7	Suppressed	-0.377624	-0.974593	0.483261	0.80296	0.771421	91	tags=43%, list=18%, signal=36%	Tcf4/Dcn/Pdgfra
TM_pom_BP_GO:0046890	TM_pom	BP	GO:0046890	regulation of lipid biosynthetic process	15/490	166/15707	0.000221626	0.00181787	0.001198	16000/74186/29817/13167/16002/13653/16007/50781/22417/19091/16001/21416/11816/18783/16592	15	15	Suppressed	-0.259665	-0.866463	0.634421	0.865937	0.831924	5	tags=13%, list=1%, signal=14%	Wnt4/Igf1
TM_pom_BP_GO:0071407	TM_pom	BP	GO:0071407	cellular response to organic cyclic compound	27/490	410/15707	0.000222362	0.00181787	0.001198	16000/98660/12759/16011/18212/14683/11647/13653/20750/13649/12193/16974/12159/11461/20393/12385/11835/17260/18035/268903/74747/12192/11826/20377/14148/99929/15903	27	27	Suppressed	-0.287109	-1.14819	0.284017	0.703603	0.675966	18	tags=11%, list=4%, signal=11%	Ntrk2/Atp1a2/Igf1
TM_pom_BP_GO:0048041	TM_pom	BP	GO:0048041	focal adhesion assembly	10/490	82/15707	0.000227698	0.00185566	0.0012229	18606/17926/14758/22417/11465/218952/11856/107581/50768/12043	10	10	Suppressed	-0.340248	-0.997086	0.460585	0.791548	0.760457	3	tags=50%, list=1%, signal=51%	Fermt2/Actg1/Gpm6b/Wnt4/Enpp2
TM_pom_BP_GO:0021983	TM_pom	BP	GO:0021983	pituitary gland development	6/490	29/15707	0.000230413	0.00185745	0.00122408	22418/12159/22417/18741/15205/21416	6	6	Suppressed	-0.452569	-1.10279	0.347189	0.72763	0.699049	284	tags=100%, list=55%, signal=45%	Tcf7l2/Hes1/Bmp4/Wnt5a/Wnt4
TM_pom_BP_GO:0031069	TM_pom	BP	GO:0031069	hair follicle morphogenesis	6/490	29/15707	0.000230413	0.00185745	0.00122408	22409/16011/12394/21808/66042/12043	6	6	Suppressed	-0.32534	-0.792769	0.705578	0.909581	0.873854	10	tags=33%, list=2%, signal=33%	Tgfb2/Wnt10a
TM_pom_BP_GO:0055002	TM_pom	BP	GO:0055002	striated muscle cell development	12/490	114/15707	0.000229096	0.00185745	0.00122408	18595/12845/77579/12159/11465/208727/16948/17260/13008/12043/19084/13007	12	12	Suppressed	-0.266127	-0.824456	0.682054	0.894183	0.85906	207	tags=67%, list=40%, signal=41%	Prkar1a/Hdac4/Bmp4/Actg1/Mef2c/Csrp1/Csrp2/Pdgfra
TM_pom_BP_GO:0043567	TM_pom	BP	GO:0043567	regulation of insulin-like growth factor receptor signaling pathway	5/490	19/15707	0.000234209	0.00187116	0.00123312	16000/16011/16012/16010/11835	5	5	Suppressed	-0.492417	-1.12699	0.32687	0.721458	0.69312	5	tags=20%, list=1%, signal=20%	Igf1
TM_pom_BP_GO:0090030	TM_pom	BP	GO:0090030	regulation of steroid hormone biosynthetic process	5/490	19/15707	0.000234209	0.00187116	0.00123312	16000/16002/50781/22417/16001	5	5	Suppressed	-0.574109	-1.31395	0.179842	0.661916	0.635917	118	tags=60%, list=23%, signal=47%	Dkk3/Wnt4/Igf1
TM_pom_BP_GO:0032350	TM_pom	BP	GO:0032350	regulation of hormone metabolic process	7/490	41/15707	0.000246747	0.0019643	0.0012945	16000/16002/13653/50781/22417/16001/21416	7	7	Suppressed	-0.487692	-1.25866	0.221087	0.683116	0.656284	5	tags=43%, list=1%, signal=43%	Dkk3/Wnt4/Igf1
TM_pom_BP_GO:0002064	TM_pom	BP	GO:0002064	epithelial cell development	18/490	225/15707	0.000252439	0.00199892	0.00131732	12741/64103/12822/14184/18671/19684/15894/14609/22418/12159/21872/16779/20682/11835/12819/77446/22352/218772	18	18	Suppressed	-0.177618	-0.629673	0.898665	0.983219	0.9446	143	tags=44%, list=28%, signal=33%	Bmp4/Col18a1/Gja1/Tjp1/Vim/Wnt5a/Abcb1a/Cldn5
TM_pom_BP_GO:0071214	TM_pom	BP	GO:0071214	cellular response to abiotic stimulus	19/490	245/15707	0.000255549	0.0020164	0.00132883	98660/107589/20319/12955/13653/14609/667742/13197/11461/21857/18708/22411/20682/12444/11852/12192/11826/20377/12842	19	19	Suppressed	-0.175044	-0.632076	0.898382	0.983219	0.9446	64	tags=47%, list=12%, signal=43%	Aqp1/Zfp36l1/Wnt11/Rhob/Gja1/Actb/Gadd45a/Col1a1/Atp1a2
TM_pom_BP_GO:0104004	TM_pom	BP	GO:0104004	cellular response to environmental stimulus	19/490	245/15707	0.000255549	0.0020164	0.00132883	98660/107589/20319/12955/13653/14609/667742/13197/11461/21857/18708/22411/20682/12444/11852/12192/11826/20377/12842	19	19	Suppressed	-0.175044	-0.632076	0.898382	0.983219	0.9446	64	tags=47%, list=12%, signal=43%	Aqp1/Zfp36l1/Wnt11/Rhob/Gja1/Actb/Gadd45a/Col1a1/Atp1a2
TM_pom_BP_GO:0072102	TM_pom	BP	GO:0072102	glomerulus morphogenesis	4/490	11/15707	0.000259285	0.00202796	0.00133646	18595/211401/12159/17260	4	4	Suppressed	-0.685039	-1.44222	0.0969107	0.638055	0.612993	165	tags=100%, list=32%, signal=68%	Mef2c/Mtss1/Pdgfra
TM_pom_BP_GO:0072224	TM_pom	BP	GO:0072224	metanephric glomerulus development	4/490	11/15707	0.000259285	0.00202796	0.00133646	18595/13653/16779/11826	4	4	Suppressed	-0.508326	-1.07019	0.377486	0.744425	0.715185	20	tags=100%, list=4%, signal=97%	Lamb2/Aqp1/Pdgfra
TM_pom_BP_GO:0050890	TM_pom	BP	GO:0050890	cognition	22/490	308/15707	0.000276815	0.00216129	0.00142432	16000/19242/98660/20317/17242/16777/18212/14683/13167/16002/242202/13653/13649/20393/66860/17260/12444/11816/17967/18205/21833/12846	22	22	Suppressed	-0.498648	-1.8822	0.00547071	0.506547	0.48665	27	tags=23%, list=5%, signal=22%	Lamb1/Ntrk2/Atp1a2/Igf1/Ptn
TM_pom_BP_GO:0062014	TM_pom	BP	GO:0062014	negative regulation of small molecule metabolic process	10/490	84/15707	0.000278017	0.00216688	0.00142801	56312/13167/50781/22417/98496/19091/208727/20682/11816/74747	10	10	Suppressed	-0.34855	-1.02141	0.436227	0.777567	0.747025	125	tags=40%, list=24%, signal=31%	Pid1/Dkk3/Wnt4/Nupr1
TM_pom_BP_GO:0050654	TM_pom	BP	GO:0050654	chondroitin sulfate proteoglycan metabolic process	6/490	30/15707	0.000280502	0.00217486	0.00143326	16000/13179/12111/68169/74241/14042	6	6	Suppressed	-0.643944	-1.56912	0.0495369	0.567372	0.545086	57	tags=50%, list=11%, signal=45%	Dcn/Ndnf/Igf1
TM_pom_BP_GO:0048145	TM_pom	BP	GO:0048145	regulation of fibroblast proliferation	11/490	100/15707	0.000282025	0.00217911	0.00143606	16000/56312/18595/14319/14456/14114/13649/22418/13134/11826/20377	11	11	Suppressed	-0.543332	-1.63234	0.0373018	0.552413	0.530715	20	tags=36%, list=4%, signal=36%	Wnt5a/Pdgfra/Nupr1/Igf1
TM_pom_BP_GO:1901890	TM_pom	BP	GO:1901890	positive regulation of cell junction assembly	12/490	117/15707	0.00029224	0.00224637	0.00148039	18606/12741/18212/17926/19266/396184/22417/218952/18708/18213/107581/68792	12	12	Suppressed	-0.438152	-1.35739	0.133754	0.659727	0.633814	18	tags=25%, list=4%, signal=25%	Ntrk2/Cldn5/Enpp2
TM_pom_BP_GO:0010232	TM_pom	BP	GO:0010232	vascular transport	5/490	20/15707	0.000304323	0.00233123	0.00153631	18671/14609/20502/11816/16592	5	5	Suppressed	-0.475401	-1.08804	0.365438	0.73859	0.70958	141	tags=100%, list=28%, signal=73%	Slc16a2/Fabp5/Gja1/Abcb1a
TM_pom_BP_GO:0043116	TM_pom	BP	GO:0043116	negative regulation of vascular permeability	5/490	20/15707	0.000304323	0.00233123	0.00153631	12741/11600/218952/83397/11816	5	5	Suppressed	-0.339467	-0.776933	0.731089	0.914611	0.878686	16	tags=60%, list=3%, signal=59%	Akap12/Fermt2/Cldn5
TM_pom_BP_GO:0055017	TM_pom	BP	GO:0055017	cardiac muscle tissue growth	11/490	101/15707	0.000307786	0.00235372	0.00155114	16000/19735/21808/14609/21385/19091/17260/77446/17967/19084/19662	11	11	Suppressed	-0.450466	-1.35334	0.135805	0.659727	0.633814	145	tags=55%, list=28%, signal=40%	Tbx2/Gja1/Mef2c/Tgfb2/Rgs2/Igf1
TM_pom_BP_GO:0006029	TM_pom	BP	GO:0006029	proteoglycan metabolic process	9/490	70/15707	0.000311823	0.00237645	0.00156612	16000/13179/12111/12814/68169/74241/21416/14042/240725	9	9	Suppressed	-0.501805	-1.41661	0.113195	0.653854	0.628172	57	tags=33%, list=11%, signal=30%	Dcn/Ndnf/Igf1
TM_pom_BP_GO:0003170	TM_pom	BP	GO:0003170	heart valve development	8/490	56/15707	0.000322608	0.00245028	0.00161477	21808/16007/12159/18741/20682/17260/20564/20677	8	8	Suppressed	-0.197055	-0.534148	0.958898	0.998379	0.959164	284	tags=88%, list=55%, signal=40%	Pitx2/Slit3/Sox9/Sox4/Bmp4/Mef2c/Tgfb2
TM_pom_BP_GO:0001958	TM_pom	BP	GO:0001958	endochondral ossification	6/490	31/15707	0.000338752	0.00252988	0.00166723	14683/11647/12159/17260/14042/12842	6	6	Suppressed	-0.232168	-0.565734	0.939694	0.996026	0.956903	165	tags=50%, list=32%, signal=34%	Bmp4/Mef2c/Col1a1
TM_pom_BP_GO:0036075	TM_pom	BP	GO:0036075	replacement ossification	6/490	31/15707	0.000338752	0.00252988	0.00166723	14683/11647/12159/17260/14042/12842	6	6	Suppressed	-0.232168	-0.565734	0.939694	0.996026	0.956903	165	tags=50%, list=32%, signal=34%	Bmp4/Mef2c/Col1a1
TM_pom_BP_GO:0048144	TM_pom	BP	GO:0048144	fibroblast proliferation	11/490	102/15707	0.0003355	0.00252988	0.00166723	16000/56312/18595/14319/14456/14114/13649/22418/13134/11826/20377	11	11	Suppressed	-0.543332	-1.63234	0.0373018	0.552413	0.530715	20	tags=36%, list=4%, signal=36%	Wnt5a/Pdgfra/Nupr1/Igf1
TM_pom_BP_GO:0060914	TM_pom	BP	GO:0060914	heart formation	6/490	31/15707	0.000338752	0.00252988	0.00166723	22418/12159/22411/15205/17260/14042	6	6	Suppressed	-0.523715	-1.27616	0.203963	0.674322	0.647836	248	tags=100%, list=48%, signal=52%	Hes1/Bmp4/Wnt11/Mef2c/Wnt5a
TM_pom_BP_GO:0071260	TM_pom	BP	GO:0071260	cellular response to mechanical stimulus	6/490	31/15707	0.000338752	0.00252988	0.00166723	98660/667742/22411/20682/11826/12842	6	6	Suppressed	-0.573699	-1.39795	0.127504	0.659727	0.633814	44	tags=67%, list=9%, signal=62%	Aqp1/Wnt11/Col1a1/Atp1a2
TM_pom_BP_GO:0048588	TM_pom	BP	GO:0048588	developmental cell growth	19/490	252/15707	0.000364535	0.00270092	0.00177995	16000/19735/21844/13175/20315/20348/22418/396184/24136/19091/18187/16779/50706/20682/20564/18213/11816/56177/12904	19	19	Suppressed	-0.259713	-0.937812	0.534746	0.823621	0.791271	113	tags=26%, list=22%, signal=21%	Zeb2/Sema3c/Wnt5a/Rgs2/Igf1
TM_pom_BP_GO:0060601	TM_pom	BP	GO:0060601	lateral sprouting from an epithelium	4/490	12/15707	0.000379367	0.00279119	0.00183943	22418/12159/11835/240725	4	4	Suppressed	-0.423228	-0.891029	0.602201	0.852402	0.818921	298	tags=100%, list=58%, signal=42%	Sulf1/Bmp4/Wnt5a
TM_pom_BP_GO:0061308	TM_pom	BP	GO:0061308	cardiac neural crest cell development involved in heart development	4/490	12/15707	0.000379367	0.00279119	0.00183943	20348/12159/18741/15205	4	4	Suppressed	-0.450787	-0.94905	0.528777	0.822572	0.790263	284	tags=100%, list=55%, signal=45%	Hes1/Bmp4/Sema3c
TM_pom_BP_GO:0007369	TM_pom	BP	GO:0007369	gastrulation	14/490	156/15707	0.000381859	0.0028003	0.00184544	67916/19252/20319/14609/16974/22418/12159/12832/16600/22411/14042/20377/12831/19084	14	14	Suppressed	-0.227257	-0.740109	0.779455	0.933193	0.896539	165	tags=57%, list=32%, signal=40%	Bmp4/Wnt11/Klf4/Gja1/Wnt5a/Col5a1/Dusp1/Col5a2
TM_pom_BP_GO:0003283	TM_pom	BP	GO:0003283	atrial septum development	5/490	21/15707	0.000389255	0.0028221	0.0018598	21808/16007/22418/22411/20677	5	5	Suppressed	-0.262005	-0.599646	0.913914	0.987796	0.948996	86	tags=60%, list=17%, signal=50%	Wnt11/Tgfb2/Wnt5a
TM_pom_BP_GO:0003338	TM_pom	BP	GO:0003338	metanephros morphogenesis	5/490	21/15707	0.000389255	0.0028221	0.0018598	12705/12159/22417/20682/15205	5	5	Suppressed	-0.501408	-1.14756	0.308118	0.713847	0.685808	72	tags=100%, list=14%, signal=87%	Hes1/Bmp4/Wnt4/Cited1
TM_pom_BP_GO:0010464	TM_pom	BP	GO:0010464	regulation of mesenchymal cell proliferation	7/490	44/15707	0.000387998	0.0028221	0.0018598	19242/16974/14451/22418/12159/22411/20682	7	7	Suppressed	-0.542286	-1.39956	0.122174	0.659727	0.633814	2	tags=57%, list=0%, signal=58%	Bmp4/Wnt11/Wnt5a/Ptn
TM_pom_BP_GO:0018958	TM_pom	BP	GO:0018958	phenol-containing compound metabolic process	11/490	104/15707	0.000397257	0.00287079	0.00189189	12705/50518/21808/22418/24136/67847/12971/20502/12043/12846/13038	11	11	Suppressed	-0.341173	-1.02499	0.431316	0.775891	0.745415	131	tags=45%, list=26%, signal=35%	a/Zeb2/Tgfb2/Wnt5a/Cited1
TM_pom_BP_GO:0150117	TM_pom	BP	GO:0150117	positive regulation of cell-substrate junction organization	6/490	32/15707	0.00040606	0.00292494	0.00192758	18606/17926/22417/218952/18708/107581	6	6	Suppressed	-0.406515	-0.99057	0.46177	0.792824	0.761683	3	tags=33%, list=1%, signal=34%	Wnt4/Enpp2
TM_pom_BP_GO:0035924	TM_pom	BP	GO:0035924	cellular response to vascular endothelial growth factor stimulus	8/490	58/15707	0.000412264	0.00294587	0.00194137	13179/18595/21413/18654/12512/18187/22341/15370	8	8	Suppressed	-0.342918	-0.929533	0.540009	0.826038	0.793592	91	tags=38%, list=18%, signal=31%	Tcf4/Dcn/Pdgfra
TM_pom_BP_GO:0042987	TM_pom	BP	GO:0042987	amyloid precursor protein catabolic process	8/490	58/15707	0.000412264	0.00294587	0.00194137	16000/12759/18212/233744/104001/20660/11816/56177	8	8	Suppressed	-0.481431	-1.30499	0.186052	0.661916	0.635917	41	tags=38%, list=8%, signal=35%	Spon1/Ntrk2/Igf1
TM_pom_BP_GO:1903510	TM_pom	BP	GO:1903510	mucopolysaccharide metabolic process	8/490	58/15707	0.000412264	0.00294587	0.00194137	13179/11600/15116/12111/68169/209378/74241/14042	8	8	Suppressed	-0.391772	-1.06196	0.388937	0.752061	0.722521	92	tags=50%, list=18%, signal=42%	Itih5/Dcn/Ndnf/Has1
TM_pom_BP_GO:0016202	TM_pom	BP	GO:0016202	regulation of striated muscle tissue development	7/490	45/15707	0.000447298	0.00317588	0.00209295	16002/14609/12159/16948/17260/21416/12043	7	7	Suppressed	-0.221752	-0.572312	0.933913	0.993838	0.954801	290	tags=86%, list=57%, signal=38%	Lox/Tcf7l2/Bcl2/Bmp4/Gja1/Mef2c
TM_pom_BP_GO:0006694	TM_pom	BP	GO:0006694	steroid biosynthetic process	12/490	123/15707	0.000463546	0.00327983	0.00216146	16000/15483/29817/16002/13653/50781/22417/19091/16001/11816/109754/14148	12	12	Suppressed	-0.378034	-1.17114	0.276965	0.702575	0.674979	72	tags=25%, list=14%, signal=22%	Wnt4/Hsd11b1/Igf1
TM_pom_BP_GO:0050714	TM_pom	BP	GO:0050714	positive regulation of protein secretion	13/490	141/15707	0.00047215	0.0033259	0.00219182	16000/21809/21808/268373/13649/14609/77579/14645/21416/12289/22341/20677/19662	13	13	Suppressed	-0.319857	-1.02079	0.437879	0.777725	0.747177	5	tags=15%, list=1%, signal=16%	Tgfb2/Igf1
TM_pom_BP_GO:0031016	TM_pom	BP	GO:0031016	pancreas development	9/490	74/15707	0.000474776	0.00333388	0.00219708	16000/12759/16002/22418/12159/20682/15205/16001/20677	9	9	Suppressed	-0.343499	-0.969707	0.486761	0.80366	0.772094	5	tags=22%, list=1%, signal=22%	Wnt5a/Igf1
TM_pom_BP_GO:0043535	TM_pom	BP	GO:0043535	regulation of blood vessel endothelial cell migration	10/490	90/15707	0.000487815	0.00341471	0.00225034	16000/21825/11600/16002/13197/16600/17260/11816/22341/68792	10	10	Suppressed	-0.308068	-0.902782	0.577059	0.835982	0.803146	5	tags=40%, list=1%, signal=40%	Klf4/Mef2c/Gadd45a/Igf1
TM_pom_BP_GO:0046889	TM_pom	BP	GO:0046889	positive regulation of lipid biosynthetic process	10/490	90/15707	0.000487815	0.00341471	0.00225034	16000/74186/13167/16002/16007/22417/16001/21416/11816/18783	10	10	Suppressed	-0.331665	-0.971934	0.494243	0.806846	0.775154	5	tags=20%, list=1%, signal=20%	Wnt4/Igf1
TM_pom_BP_GO:0045687	TM_pom	BP	GO:0045687	positive regulation of glial cell differentiation	7/490	46/15707	0.00051361	0.00354526	0.00233638	20720/18606/19242/17242/15902/15205/18205	7	7	Suppressed	-0.576298	-1.48734	0.076087	0.621718	0.597298	3	tags=29%, list=1%, signal=29%	Enpp2/Ptn
TM_pom_BP_GO:0048701	TM_pom	BP	GO:0048701	embryonic cranial skeleton morphogenesis	7/490	46/15707	0.00051361	0.00354526	0.00233638	18595/21809/14683/21808/14451/12159/17260	7	7	Suppressed	-0.277898	-0.717216	0.793696	0.942436	0.905418	108	tags=57%, list=21%, signal=46%	Bmp4/Mef2c/Tgfb2/Pdgfra
TM_pom_BP_GO:0031102	TM_pom	BP	GO:0031102	neuron projection regeneration	8/490	60/15707	0.000521179	0.0035809	0.00235987	19242/15234/16779/16600/16001/18007/18213/12043	8	8	Suppressed	-0.562897	-1.52582	0.0677744	0.604834	0.581077	2	tags=38%, list=0%, signal=38%	Klf4/Hgf/Ptn
TM_pom_BP_GO:0045428	TM_pom	BP	GO:0045428	regulation of nitric oxide biosynthetic process	8/490	60/15707	0.000521179	0.0035809	0.00235987	16000/12759/19223/15894/16598/12490/16600/11898	8	8	Suppressed	-0.383605	-1.03982	0.415391	0.766083	0.735992	29	tags=25%, list=6%, signal=24%	Cd34/Igf1
TM_pom_BP_GO:0032870	TM_pom	BP	GO:0032870	cellular response to hormone stimulus	27/490	433/15707	0.000523771	0.00359318	0.00236796	16000/98660/18212/50915/14683/16002/19684/14783/12193/67972/12159/98496/20393/20660/16362/18708/11835/17260/16001/107351/74747/218772/21833/12192/11826/20377/15370	27	27	Suppressed	-0.326862	-1.30716	0.156337	0.659727	0.633814	18	tags=11%, list=4%, signal=11%	Ntrk2/Atp1a2/Igf1
TM_pom_BP_GO:0021854	TM_pom	BP	GO:0021854	hypothalamus development	4/490	13/15707	0.000534518	0.00363342	0.00239448	22187/68169/18187/18741	4	4	Suppressed	-0.309984	-0.652613	0.873043	0.970062	0.931959	51	tags=50%, list=10%, signal=45%	Ubb/Ndnf
TM_pom_BP_GO:0048070	TM_pom	BP	GO:0048070	regulation of developmental pigmentation	4/490	13/15707	0.000534518	0.00363342	0.00239448	13616/17311/24136/12043	4	4	Suppressed	-0.664206	-1.39836	0.118705	0.658069	0.632221	113	tags=75%, list=22%, signal=59%	Zeb2/Kitl/Edn3
TM_pom_BP_GO:0072077	TM_pom	BP	GO:0072077	renal vesicle morphogenesis	4/490	13/15707	0.000534518	0.00363342	0.00239448	12705/12159/22417/20682	4	4	Suppressed	-0.57656	-1.21384	0.250317	0.698266	0.670839	72	tags=75%, list=14%, signal=65%	Bmp4/Wnt4/Cited1
TM_pom_BP_GO:0060047	TM_pom	BP	GO:0060047	heart contraction	16/490	200/15707	0.000548061	0.00371356	0.00244729	98660/14219/12293/19735/13616/21808/242202/14609/19091/208727/20266/18708/12289/14042/21833/13400	16	16	Suppressed	-0.376284	-1.28196	0.179562	0.661916	0.635917	42	tags=25%, list=8%, signal=24%	Rgs2/Edn3/Cacna2d1/Atp1a2
TM_pom_BP_GO:0060419	TM_pom	BP	GO:0060419	heart growth	11/490	108/15707	0.000549634	0.00371356	0.00244729	16000/19735/21808/14609/21385/19091/17260/77446/17967/19084/19662	11	11	Suppressed	-0.450466	-1.35334	0.135805	0.659727	0.633814	145	tags=55%, list=28%, signal=40%	Tbx2/Gja1/Mef2c/Tgfb2/Rgs2/Igf1
TM_pom_BP_GO:0035909	TM_pom	BP	GO:0035909	aorta morphogenesis	6/490	34/15707	0.000571671	0.0038508	0.00253773	107589/21808/13642/21385/15205/20677	6	6	Suppressed	-0.283428	-0.69064	0.827267	0.954297	0.916813	257	tags=83%, list=50%, signal=42%	Sox4/Hes1/Efnb2/Tbx2/Tgfb2
TM_pom_BP_GO:0070306	TM_pom	BP	GO:0070306	lens fiber cell differentiation	6/490	34/15707	0.000571671	0.0038508	0.00253773	14184/24136/22352/18213/24063/20482	6	6	Suppressed	-0.224424	-0.546862	0.953909	0.997971	0.958772	278	tags=83%, list=54%, signal=39%	Skil/Ntrk3/Spry1/Zeb2/Vim
TM_pom_BP_GO:0043588	TM_pom	BP	GO:0043588	skin development	18/490	241/15707	0.000577176	0.00388203	0.00255831	22409/16011/14683/12394/13167/21808/12845/13649/66042/22418/12832/20682/21416/12192/12043/12831/12843/12842	18	18	Suppressed	-0.307925	-1.09162	0.343814	0.725205	0.69672	102	tags=39%, list=20%, signal=32%	Col1a2/Tgfb2/Wnt5a/Col5a1/Col1a1/Col5a2/Wnt10a
TM_pom_BP_GO:0035904	TM_pom	BP	GO:0035904	aorta development	8/490	61/15707	0.000583766	0.00392045	0.00258363	107589/21808/13642/77579/21385/16948/15205/20677	8	8	Suppressed	-0.19246	-0.521694	0.966113	0.998917	0.959681	416	tags=100%, list=81%, signal=19%	Mylk/Lox/Sox4/Hes1/Efnb2/Tbx2/Tgfb2
TM_pom_BP_GO:0038066	TM_pom	BP	GO:0038066	p38MAPK cascade	7/490	47/15707	0.000587517	0.00393381	0.00259244	19252/70097/14184/15234/13197/17873/12192	7	7	Suppressed	-0.483899	-1.24887	0.226739	0.689532	0.662448	90	tags=57%, list=18%, signal=48%	Hgf/Sash1/Gadd45a/Dusp1
TM_pom_BP_GO:0042446	TM_pom	BP	GO:0042446	hormone biosynthetic process	7/490	47/15707	0.000587517	0.00393381	0.00259244	16000/16002/13653/50781/22417/16001/14148	7	7	Suppressed	-0.479135	-1.23658	0.234348	0.694028	0.666768	149	tags=57%, list=29%, signal=41%	Fdx1/Dkk3/Wnt4/Igf1
TM_pom_BP_GO:0030204	TM_pom	BP	GO:0030204	chondroitin sulfate metabolic process	5/490	23/15707	0.000611352	0.004069	0.00268153	13179/12111/68169/74241/14042	5	5	Suppressed	-0.413181	-0.94564	0.518645	0.817438	0.78533	57	tags=40%, list=11%, signal=36%	Dcn/Ndnf
TM_pom_BP_GO:0042310	TM_pom	BP	GO:0042310	vasoconstriction	10/490	93/15707	0.000634076	0.0042077	0.00277293	98660/11475/13616/242202/12845/13649/15894/14609/67972/14062	10	10	Suppressed	-0.331116	-0.970325	0.49535	0.806846	0.775154	34	tags=40%, list=7%, signal=38%	Gja1/Atp2b1/Edn3/Atp1a2
TM_pom_BP_GO:0009798	TM_pom	BP	GO:0009798	axis specification	9/490	77/15707	0.00063821	0.00422259	0.00278275	14734/22420/12705/16974/22418/12159/21386/18741/20377	9	9	Suppressed	-0.27272	-0.769897	0.737202	0.916971	0.880953	31	tags=33%, list=6%, signal=32%	Wnt5a/Cited1/Wnt6
TM_pom_BP_GO:0071229	TM_pom	BP	GO:0071229	cellular response to acid chemical	9/490	77/15707	0.00063821	0.00422259	0.00278275	18212/18595/13649/12608/16598/12832/107581/12843/12842	9	9	Suppressed	-0.645403	-1.82199	0.011474	0.506547	0.48665	60	tags=67%, list=12%, signal=60%	Col1a2/Cebpb/Col1a1/Col5a2/Pdgfra/Ntrk2
TM_pom_BP_GO:0080164	TM_pom	BP	GO:0080164	regulation of nitric oxide metabolic process	8/490	62/15707	0.000652289	0.00430935	0.00283992	16000/12759/19223/15894/16598/12490/16600/11898	8	8	Suppressed	-0.383605	-1.03982	0.415391	0.766083	0.735992	29	tags=25%, list=6%, signal=24%	Cd34/Igf1
TM_pom_BP_GO:0007613	TM_pom	BP	GO:0007613	memory	13/490	146/15707	0.00065838	0.00434317	0.00286221	16000/19242/20317/17242/18212/16002/242202/13653/20393/12444/11816/18205/12846	13	13	Suppressed	-0.538988	-1.72012	0.0235902	0.552413	0.530715	18	tags=23%, list=4%, signal=23%	Ntrk2/Igf1/Ptn
TM_pom_BP_GO:0019748	TM_pom	BP	GO:0019748	secondary metabolic process	7/490	48/15707	0.000669627	0.00437856	0.00288553	18484/12705/50518/22418/24136/14261/12043	7	7	Suppressed	-0.306411	-0.790804	0.708261	0.910087	0.87434	131	tags=57%, list=26%, signal=43%	a/Zeb2/Wnt5a/Cited1
TM_pom_BP_GO:0048634	TM_pom	BP	GO:0048634	regulation of muscle organ development	7/490	48/15707	0.000669627	0.00437856	0.00288553	16002/14609/12159/16948/17260/21416/12043	7	7	Suppressed	-0.221752	-0.572312	0.933913	0.993838	0.954801	290	tags=86%, list=57%, signal=38%	Lox/Tcf7l2/Bcl2/Bmp4/Gja1/Mef2c
TM_pom_BP_GO:0050730	TM_pom	BP	GO:0050730	regulation of peptidyl-tyrosine phosphorylation	18/490	244/15707	0.000667415	0.00437856	0.00288553	16000/18606/11600/67916/18595/20319/14456/14184/16002/15234/17311/13649/15894/16362/15205/22341/18205/20377	18	18	Suppressed	-0.378677	-1.34245	0.135942	0.659727	0.633814	20	tags=17%, list=4%, signal=17%	Pdgfra/Igf1/Enpp2
TM_pom_BP_GO:0060428	TM_pom	BP	GO:0060428	lung epithelium development	7/490	48/15707	0.000669627	0.00437856	0.00288553	16000/14184/12159/16598/20682/21833/52377	7	7	Suppressed	-0.531095	-1.37068	0.14087	0.659727	0.633814	5	tags=29%, list=1%, signal=29%	Bmp4/Igf1
TM_pom_BP_GO:0045185	TM_pom	BP	GO:0045185	maintenance of protein location	10/490	94/15707	0.000690208	0.00449996	0.00296554	19762/19240/14119/17965/14609/20660/19241/18035/21833/103172	10	10	Suppressed	-0.387416	-1.13531	0.310895	0.71705	0.688886	48	tags=60%, list=9%, signal=55%	Sorl1/Tmsb4x/Gja1/Tmsb10/Rit2/Nbl1
TM_pom_BP_GO:0043583	TM_pom	BP	GO:0043583	ear development	16/490	205/15707	0.000716852	0.00464941	0.00306403	16000/29817/12814/14184/320398/21808/329628/14451/22418/12159/20682/15205/17701/16658/230857/12043	16	16	Suppressed	-0.271983	-0.926616	0.555831	0.830258	0.797647	5	tags=19%, list=1%, signal=19%	Tgfb2/Wnt5a/Igf1
TM_pom_BP_GO:0030502	TM_pom	BP	GO:0030502	negative regulation of bone mineralization	4/490	14/15707	0.000729969	0.00467725	0.00308237	13601/16998/20682/76566	4	4	Suppressed	-0.381603	-0.803394	0.70821	0.910087	0.87434	37	tags=75%, list=7%, signal=70%	Rflnb/Sox9/Ecm1
TM_pom_BP_GO:0060425	TM_pom	BP	GO:0060425	lung morphogenesis	8/490	63/15707	0.000727152	0.00467725	0.00308237	16000/18595/12159/20666/18741/20682/14042/24063	8	8	Suppressed	-0.624459	-1.69269	0.0238303	0.552413	0.530715	20	tags=25%, list=4%, signal=24%	Pdgfra/Igf1
TM_pom_BP_GO:0070977	TM_pom	BP	GO:0070977	bone maturation	5/490	24/15707	0.00075262	0.00480172	0.0031644	16000/14184/329628/76566/14042	5	5	Suppressed	-0.60006	-1.37335	0.139143	0.659727	0.633814	5	tags=60%, list=1%, signal=60%	Rflnb/Ext1/Igf1
TM_pom_BP_GO:0046683	TM_pom	BP	GO:0046683	response to organophosphorus	9/490	79/15707	0.000770756	0.00490341	0.00323142	16011/12705/14745/18708/12916/12192/11826/14148/11670	9	9	Suppressed	-0.329036	-0.928877	0.532877	0.823621	0.791271	200	tags=78%, list=39%, signal=48%	Crem/Aqp1/Zfp36l1/Lpar1/Fdx1/Cited1/Aldh3a1
TM_pom_BP_GO:0008544	TM_pom	BP	GO:0008544	epidermis development	19/490	268/15707	0.00077518	0.00492454	0.00324534	22409/16011/14683/12394/13167/21808/13649/66042/22418/12159/16600/20682/18822/15205/16001/64817/18205/12192/12043	19	19	Suppressed	-0.147027	-0.530908	0.967874	0.999829	0.960557	10	tags=37%, list=2%, signal=38%	Zfp36l1/Bmp4/Plod1/Klf4/Tgfb2/Wnt5a/Wnt10a
TM_pom_BP_GO:0034331	TM_pom	BP	GO:0034331	cell junction maintenance	6/490	36/15707	0.000785434	0.00497553	0.00327895	211401/21872/218952/14062/15481/103172	6	6	Suppressed	-0.37966	-0.925132	0.547922	0.830258	0.797647	239	tags=83%, list=47%, signal=45%	Chchd10/Hspa8/Fermt2/Tjp1/Mtss1
TM_pom_BP_GO:1904888	TM_pom	BP	GO:1904888	cranial skeletal system development	8/490	64/15707	0.000808779	0.00510171	0.0033621	18595/21809/14683/21808/14451/12159/17260/14042	8	8	Suppressed	-0.249953	-0.677537	0.839309	0.956503	0.918933	108	tags=38%, list=21%, signal=30%	Mef2c/Tgfb2/Pdgfra
TM_pom_BP_GO:0030856	TM_pom	BP	GO:0030856	regulation of epithelial cell differentiation	12/490	131/15707	0.000817309	0.00514824	0.00339276	12741/12705/21808/329628/12159/12608/24136/21386/20682/15205/12192/24063	12	12	Suppressed	-0.503955	-1.56124	0.0522405	0.569789	0.547409	176	tags=75%, list=34%, signal=50%	Zfp36l1/Spry1/Tbx3/Bmp4/Zeb2/Tgfb2/Cebpb/Cited1/Cldn5
TM_pom_BP_GO:0008360	TM_pom	BP	GO:0008360	regulation of cell shape	13/490	150/15707	0.000848815	0.00533165	0.00351364	19242/19684/15894/77579/68010/14745/218952/11852/58804/17886/13822/260409/50768	13	13	Suppressed	-0.385843	-1.23137	0.225792	0.689415	0.662336	2	tags=15%, list=0%, signal=16%	Bambi/Ptn
TM_pom_BP_GO:0048066	TM_pom	BP	GO:0048066	developmental pigmentation	7/490	50/15707	0.000861011	0.00540066	0.00355912	12705/13616/17311/24136/12512/17260/12043	7	7	Suppressed	-0.633369	-1.63464	0.0328261	0.552413	0.530715	113	tags=86%, list=22%, signal=68%	Cd63/Zeb2/Mef2c/Kitl/Edn3/Cited1
TM_pom_BP_GO:0003015	TM_pom	BP	GO:0003015	heart process	16/490	209/15707	0.000882097	0.0055197	0.00363756	98660/14219/12293/19735/13616/21808/242202/14609/19091/208727/20266/18708/12289/14042/21833/13400	16	16	Suppressed	-0.376284	-1.28196	0.179562	0.661916	0.635917	42	tags=25%, list=8%, signal=24%	Rgs2/Edn3/Cacna2d1/Atp1a2
TM_pom_BP_GO:0071230	TM_pom	BP	GO:0071230	cellular response to amino acid stimulus	8/490	65/15707	0.000897606	0.00556765	0.00366916	18212/18595/13649/12608/12832/107581/12843/12842	8	8	Suppressed	-0.693418	-1.87962	0.00546568	0.506547	0.48665	102	tags=75%, list=20%, signal=61%	Col1a2/Cebpb/Col1a1/Col5a2/Pdgfra/Ntrk2
TM_pom_BP_GO:1901652	TM_pom	BP	GO:1901652	response to peptide	23/490	358/15707	0.000893237	0.00556765	0.00366916	16000/20317/12293/12705/50915/16002/13653/14783/15894/14609/67972/98496/20393/20660/16362/18708/16001/107351/22352/18035/12192/15370/19662	23	23	Suppressed	-0.275122	-1.04713	0.399861	0.756056	0.726359	31	tags=35%, list=6%, signal=34%	Gja1/Pid1/Atp2b1/Vim/Grb14/Cited1/Cacna2d1/Igf1
TM_pom_BP_GO:0001759	TM_pom	BP	GO:0001759	organ induction	5/490	25/15707	0.0009169	0.0056481	0.00372218	22418/12159/22411/11835/24063	5	5	Suppressed	-0.50365	-1.15269	0.304283	0.713127	0.685116	175	tags=80%, list=34%, signal=53%	Spry1/Bmp4/Wnt11/Wnt5a
TM_pom_BP_GO:0006582	TM_pom	BP	GO:0006582	melanin metabolic process	5/490	25/15707	0.0009169	0.0056481	0.00372218	12705/50518/22418/24136/12043	5	5	Suppressed	-0.654824	-1.49868	0.0726614	0.617724	0.59346	131	tags=80%, list=26%, signal=60%	a/Zeb2/Wnt5a/Cited1
TM_pom_BP_GO:0050729	TM_pom	BP	GO:0050729	positive regulation of inflammatory response	11/490	115/15707	0.000932967	0.00572339	0.0037718	56312/17242/242202/13649/21817/22418/12608/16803/18569/18035/18783	11	11	Suppressed	-0.321634	-0.966288	0.497431	0.806846	0.775154	94	tags=36%, list=18%, signal=30%	Tgm2/Wnt5a/Cebpb/Nupr1
TM_pom_BP_GO:0001890	TM_pom	BP	GO:0001890	placenta development	13/490	152/15707	0.000960158	0.00586389	0.00386438	19242/19223/12705/72780/16002/16157/16007/13649/12608/15205/12192/18783/67971	13	13	Suppressed	-0.405433	-1.29389	0.177938	0.661916	0.635917	65	tags=31%, list=13%, signal=28%	Tppp3/Cebpb/Cited1/Ptn
TM_pom_BP_GO:0014897	TM_pom	BP	GO:0014897	striated muscle hypertrophy	10/490	98/15707	0.000957307	0.00586389	0.00386438	16000/16011/17926/19735/21844/242202/19091/11835/17260/230857	10	10	Suppressed	-0.289948	-0.849682	0.641718	0.868694	0.834572	42	tags=20%, list=8%, signal=19%	Rgs2/Igf1
TM_pom_BP_GO:0031103	TM_pom	BP	GO:0031103	axon regeneration	7/490	51/15707	0.000971624	0.00586389	0.00386438	19242/16779/16600/16001/18007/18213/12043	7	7	Suppressed	-0.622637	-1.60694	0.0397826	0.552413	0.530715	2	tags=29%, list=0%, signal=29%	Klf4/Ptn
TM_pom_BP_GO:0048638	TM_pom	BP	GO:0048638	regulation of developmental growth	23/490	360/15707	0.000962564	0.00586389	0.00386438	16000/19735/14683/14184/16002/93960/20315/20348/14609/22418/12159/21385/11835/17260/16001/21416/18213/11816/17967/56177/12043/12904/19662	23	23	Suppressed	-0.22727	-0.865003	0.645184	0.871831	0.837587	108	tags=35%, list=21%, signal=29%	Tbx2/Gja1/Mef2c/Nkd1/Sema3c/Wnt5a/Rgs2/Igf1
TM_pom_BP_GO:0072087	TM_pom	BP	GO:0072087	renal vesicle development	4/490	15/15707	0.00097102	0.00586389	0.00386438	12705/12159/22417/20682	4	4	Suppressed	-0.57656	-1.21384	0.250317	0.698266	0.670839	72	tags=75%, list=14%, signal=65%	Bmp4/Wnt4/Cited1
TM_pom_BP_GO:0043524	TM_pom	BP	GO:0043524	negative regulation of neuron apoptotic process	14/490	172/15707	0.00101008	0.0060632	0.00399573	17242/11600/12705/18212/21809/17748/68169/12608/18008/14062/17260/11816/18205/12043	14	14	Suppressed	-0.370581	-1.20687	0.242622	0.696649	0.669286	60	tags=36%, list=12%, signal=32%	Cebpb/Ndnf/Cited1/Mt1/Ntrk2
TM_pom_BP_GO:0050727	TM_pom	BP	GO:0050727	regulation of inflammatory response	20/490	296/15707	0.00103391	0.00618958	0.00407902	16000/56312/20317/17242/19223/17470/15234/242202/13649/21817/22418/12608/16803/54598/18569/18133/18035/11816/11669/18783	20	20	Suppressed	-0.29598	-1.08514	0.351159	0.731983	0.703232	94	tags=30%, list=18%, signal=25%	Tgm2/Hgf/Wnt5a/Cebpb/Nupr1/Igf1
TM_pom_BP_GO:0014896	TM_pom	BP	GO:0014896	muscle hypertrophy	10/490	99/15707	0.00103587	0.00619303	0.00408129	16000/16011/17926/19735/21844/242202/19091/11835/17260/230857	10	10	Suppressed	-0.289948	-0.849682	0.641718	0.868694	0.834572	42	tags=20%, list=8%, signal=19%	Rgs2/Igf1
TM_pom_BP_GO:0010517	TM_pom	BP	GO:0010517	regulation of phospholipase activity	7/490	52/15707	0.00109312	0.00651785	0.00429536	18595/19735/14184/16007/14745/11856/50768	7	7	Suppressed	-0.36847	-0.950971	0.507174	0.814735	0.782733	42	tags=29%, list=8%, signal=27%	Rgs2/Pdgfra
TM_pom_BP_GO:0048678	TM_pom	BP	GO:0048678	response to axon injury	8/490	67/15707	0.00109869	0.00652492	0.00430001	19242/14184/16779/16600/16001/18007/18213/12043	8	8	Suppressed	-0.556538	-1.50858	0.0725842	0.617724	0.59346	2	tags=25%, list=0%, signal=25%	Klf4/Ptn
TM_pom_BP_GO:0001704	TM_pom	BP	GO:0001704	formation of primary germ layer	9/490	84/15707	0.0012022	0.00706448	0.0046556	19252/20319/14609/22418/12159/12832/22411/12831/19084	9	9	Suppressed	-0.372468	-1.05149	0.401589	0.757069	0.727332	165	tags=78%, list=32%, signal=54%	Bmp4/Wnt11/Gja1/Wnt5a/Col5a1/Dusp1/Col5a2
TM_pom_BP_GO:0051781	TM_pom	BP	GO:0051781	positive regulation of cell division	8/490	68/15707	0.00121189	0.00709763	0.00467744	19242/17242/21809/16002/21808/18654/16001/22341	8	8	Suppressed	-0.414347	-1.12315	0.330127	0.722064	0.693703	2	tags=25%, list=0%, signal=25%	Tgfb2/Ptn
TM_pom_BP_GO:0060251	TM_pom	BP	GO:0060251	regulation of glial cell proliferation	6/490	39/15707	0.00121578	0.00709763	0.00467744	16000/19242/13649/20666/15205/22352	6	6	Suppressed	-0.788009	-1.92017	0.00129227	0.490254	0.470998	5	tags=50%, list=1%, signal=50%	Vim/Igf1/Ptn
TM_pom_BP_GO:0070570	TM_pom	BP	GO:0070570	regulation of neuron projection regeneration	6/490	39/15707	0.00121578	0.00709763	0.00467744	19242/15234/16600/16001/18007/18213	6	6	Suppressed	-0.622627	-1.51718	0.066121	0.604834	0.581077	2	tags=50%, list=0%, signal=50%	Klf4/Hgf/Ptn
TM_pom_BP_GO:0019216	TM_pom	BP	GO:0019216	regulation of lipid metabolic process	21/490	322/15707	0.00122245	0.00711793	0.00469082	16000/74186/18595/15902/29817/13167/14184/16002/13653/16007/50781/22417/20660/19091/20682/16001/21416/11816/21833/18783/16592	21	21	Suppressed	-0.245704	-0.912862	0.570125	0.831376	0.798721	20	tags=10%, list=4%, signal=10%	Pdgfra/Igf1
TM_pom_BP_GO:0070572	TM_pom	BP	GO:0070572	positive regulation of neuron projection regeneration	4/490	16/15707	0.001263	0.00731591	0.00482129	19242/15234/16001/18213	4	4	Suppressed	-0.736378	-1.55031	0.0423191	0.555913	0.534078	2	tags=50%, list=0%, signal=50%	Hgf/Ptn
TM_pom_BP_GO:1905209	TM_pom	BP	GO:1905209	positive regulation of cardiocyte differentiation	4/490	16/15707	0.001263	0.00731591	0.00482129	21808/13642/12159/17260	4	4	Suppressed	-0.685039	-1.44222	0.0969107	0.638055	0.612993	165	tags=100%, list=32%, signal=68%	Efnb2/Mef2c/Tgfb2
TM_pom_BP_GO:0001893	TM_pom	BP	GO:0001893	maternal placenta development	5/490	27/15707	0.00132348	0.00759723	0.00500668	19242/19223/16157/18783/67971	5	5	Suppressed	-0.56943	-1.30324	0.187939	0.661916	0.635917	2	tags=40%, list=0%, signal=40%	Tppp3/Ptn
TM_pom_BP_GO:0043523	TM_pom	BP	GO:0043523	regulation of neuron apoptotic process	18/490	259/15707	0.00132307	0.00759723	0.00500668	17242/11600/12705/18212/21809/17748/14184/68169/21808/13653/12608/208727/18008/14062/17260/11816/18205/12043	18	18	Suppressed	-0.293878	-1.04182	0.404207	0.759139	0.729321	60	tags=39%, list=12%, signal=36%	Mef2c/Tgfb2/Cebpb/Ndnf/Cited1/Mt1/Ntrk2
TM_pom_BP_GO:0048799	TM_pom	BP	GO:0048799	animal organ maturation	5/490	27/15707	0.00132348	0.00759723	0.00500668	16000/14184/329628/76566/14042	5	5	Suppressed	-0.60006	-1.37335	0.139143	0.659727	0.633814	5	tags=60%, list=1%, signal=60%	Rflnb/Ext1/Igf1
TM_pom_BP_GO:0051894	TM_pom	BP	GO:0051894	positive regulation of focal adhesion assembly	5/490	27/15707	0.00132348	0.00759723	0.00500668	18606/17926/22417/218952/107581	5	5	Suppressed	-0.440756	-1.00875	0.44641	0.781345	0.750655	3	tags=40%, list=1%, signal=40%	Wnt4/Enpp2
TM_pom_BP_GO:0006809	TM_pom	BP	GO:0006809	nitric oxide biosynthetic process	8/490	69/15707	0.0013342	0.0076196	0.00502143	16000/12759/19223/15894/16598/12490/16600/11898	8	8	Suppressed	-0.383605	-1.03982	0.415391	0.766083	0.735992	29	tags=25%, list=6%, signal=24%	Cd34/Igf1
TM_pom_BP_GO:0120193	TM_pom	BP	GO:0120193	tight junction organization	8/490	69/15707	0.0013342	0.0076196	0.00502143	12741/21809/14609/21872/11465/22411/64817/14042	8	8	Suppressed	-0.36102	-0.978601	0.480979	0.802624	0.771098	164	tags=62%, list=32%, signal=43%	Wnt11/Actg1/Gja1/Tjp1/Cldn5
TM_pom_BP_GO:0050731	TM_pom	BP	GO:0050731	positive regulation of peptidyl-tyrosine phosphorylation	14/490	178/15707	0.00140472	0.00798155	0.00525996	16000/18606/11600/67916/18595/14456/14184/16002/15234/17311/15894/15205/22341/18205	14	14	Suppressed	-0.468575	-1.52601	0.0596981	0.599802	0.576243	20	tags=21%, list=4%, signal=21%	Pdgfra/Igf1/Enpp2
TM_pom_BP_GO:0099173	TM_pom	BP	GO:0099173	postsynapse organization	15/490	198/15707	0.00140358	0.00798155	0.00525996	19242/19266/21844/14658/22418/77579/11461/18187/66860/17988/16001/15481/18213/11816/50791	15	15	Suppressed	-0.3541	-1.18158	0.258943	0.698672	0.671229	2	tags=13%, list=0%, signal=14%	Wnt5a/Ptn
TM_pom_BP_GO:0001701	TM_pom	BP	GO:0001701	in utero embryonic development	28/490	488/15707	0.00148493	0.00839455	0.00553213	16000/11600/12705/18595/21809/72780/12394/16002/211401/16007/17263/13649/14609/77579/12608/16598/21872/21386/16600/18741/15205/11835/21416/77446/17701/12192/17886/20482	28	28	Suppressed	-0.220906	-0.891343	0.616752	0.854458	0.820896	31	tags=14%, list=6%, signal=14%	Cebpb/Cited1/Pdgfra/Igf1
TM_pom_BP_GO:2000736	TM_pom	BP	GO:2000736	regulation of stem cell differentiation	7/490	55/15707	0.00153029	0.00862912	0.00568672	19242/18595/21808/12193/16998/20682/15205	7	7	Suppressed	-0.637189	-1.6445	0.031087	0.552413	0.530715	20	tags=43%, list=4%, signal=42%	Tgfb2/Pdgfra/Ptn
TM_pom_BP_GO:0120162	TM_pom	BP	GO:0120162	positive regulation of cold-induced thermogenesis	9/490	87/15707	0.00154303	0.00867907	0.00571963	14683/17150/14783/14609/12608/16001/21833/16592/14373	9	9	Suppressed	-0.208748	-0.5893	0.915711	0.98813	0.949317	408	tags=100%, list=80%, signal=21%	Mfap2/Gnas/Thra/Igf1r/G0s2/Fabp5/Gja1/Cebpb
TM_pom_BP_GO:0061311	TM_pom	BP	GO:0061311	cell surface receptor signaling pathway involved in heart development	5/490	28/15707	0.0015704	0.00877771	0.00578464	16974/22418/12159/22411/17701	5	5	Suppressed	-0.295307	-0.675864	0.849989	0.959003	0.921335	165	tags=60%, list=32%, signal=41%	Bmp4/Wnt11/Wnt5a
TM_pom_BP_GO:0071425	TM_pom	BP	GO:0071425	hematopoietic stem cell proliferation	5/490	28/15707	0.0015704	0.00877771	0.00578464	20319/17311/22418/12490/14825	5	5	Suppressed	-0.434902	-0.995352	0.459408	0.791189	0.760112	105	tags=80%, list=21%, signal=64%	Kitl/Wnt5a/Cxcl1/Cd34
TM_pom_BP_GO:1905207	TM_pom	BP	GO:1905207	regulation of cardiocyte differentiation	5/490	28/15707	0.0015704	0.00877771	0.00578464	21808/13642/13649/12159/17260	5	5	Suppressed	-0.506745	-1.15978	0.299382	0.710418	0.682514	165	tags=80%, list=32%, signal=55%	Bmp4/Efnb2/Mef2c/Tgfb2
TM_pom_BP_GO:0090257	TM_pom	BP	GO:0090257	regulation of muscle system process	16/490	221/15707	0.00158454	0.00884573	0.00582946	16000/98660/14219/16011/19735/242202/109624/67972/19091/208727/54598/14062/16600/17260/13400/230857	16	16	Suppressed	-0.347587	-1.18419	0.259644	0.698672	0.671229	6	tags=19%, list=1%, signal=19%	Rgs2/Atp1a2/Igf1
TM_pom_BP_GO:0010518	TM_pom	BP	GO:0010518	positive regulation of phospholipase activity	6/490	41/15707	0.00158978	0.00885282	0.00583413	18595/14184/16007/14745/11856/50768	6	6	Suppressed	-0.276726	-0.674308	0.846435	0.956503	0.918933	20	tags=67%, list=4%, signal=65%	Arhgap6/Dlc1/Lpar1/Pdgfra
TM_pom_BP_GO:0060841	TM_pom	BP	GO:0060841	venous blood vessel development	4/490	17/15707	0.00161123	0.00893885	0.00589083	13642/20348/18741/77446	4	4	Suppressed	-0.450787	-0.94905	0.528777	0.822572	0.790263	284	tags=100%, list=55%, signal=45%	Heg1/Efnb2/Sema3c
TM_pom_BP_GO:0001755	TM_pom	BP	GO:0001755	neural crest cell migration	7/490	56/15707	0.00170281	0.00936547	0.00617198	13616/20348/17311/12159/24136/18187/18741	7	7	Suppressed	-0.48109	-1.24163	0.231087	0.691798	0.664625	165	tags=71%, list=32%, signal=49%	Bmp4/Zeb2/Kitl/Sema3c/Edn3
TM_pom_BP_GO:0008202	TM_pom	BP	GO:0008202	steroid metabolic process	17/490	244/15707	0.00173508	0.0095312	0.0062812	16000/18595/15483/13082/29817/16002/13653/20750/50781/22417/19091/16001/11816/109754/14148/99929/12846	17	17	Suppressed	-0.333939	-1.16249	0.275986	0.702575	0.674979	72	tags=24%, list=14%, signal=21%	Wnt4/Hsd11b1/Pdgfra/Igf1
TM_pom_BP_GO:0009636	TM_pom	BP	GO:0009636	response to toxic substance	10/490	106/15707	0.00174613	0.00956834	0.00630567	56312/17748/17750/18671/23876/20266/21743/11898/12043/11669	10	10	Suppressed	-0.575863	-1.68755	0.0292294	0.552413	0.530715	49	tags=40%, list=10%, signal=37%	Abcb1a/Mt2/Mt1/Nupr1
TM_pom_BP_GO:0019229	TM_pom	BP	GO:0019229	regulation of vasoconstriction	8/490	72/15707	0.00176092	0.00962576	0.00634351	98660/13616/242202/13649/15894/14609/67972/14062	8	8	Suppressed	-0.42328	-1.14737	0.308483	0.714146	0.686095	34	tags=50%, list=7%, signal=47%	Gja1/Atp2b1/Edn3/Atp1a2
TM_pom_BP_GO:0042475	TM_pom	BP	GO:0042475	odontogenesis of dentin-containing tooth	8/490	72/15707	0.00176092	0.00962576	0.00634351	22409/22420/18595/16974/66042/12159/21416/17701	8	8	Suppressed	-0.588351	-1.59482	0.0450372	0.560503	0.538487	28	tags=38%, list=5%, signal=36%	Wnt6/Pdgfra/Wnt10a
TM_pom_BP_GO:0030857	TM_pom	BP	GO:0030857	negative regulation of epithelial cell differentiation	6/490	42/15707	0.00180671	0.00985194	0.00649257	12705/21808/21386/20682/15205/24063	6	6	Suppressed	-0.494071	-1.20392	0.260607	0.698672	0.671229	263	tags=100%, list=51%, signal=49%	Hes1/Spry1/Tbx3/Tgfb2/Cited1
TM_pom_CC_GO:0030312	TM_pom	CC	GO:0030312	external encapsulating structure	98/497	439/15830	2.86e-56	5.78e-54	4.92e-54	20720/16000/21859/19242/545370/271127/64075/14219/13010/14734/80883/20317/67896/17313/16777/13717/14264/13179/21825/11600/22420/56429/16949/13601/12837/21809/18295/13602/12111/16997/12643/17926/20200/29817/12394/16012/12814/233744/269959/329941/11647/14119/12822/116847/16002/68169/226255/72713/108075/21808/12845/16852/17150/16007/14114/20348/20195/21922/209378/21817/22418/12835/23876/22417/23888/…	98	98	Active	0.318904	1.60739	0.00997058	0.344255	0.324495	113	tags=39%, list=22%, signal=37%	Myoc/Serpine2/Timp3/Fmod/Gpc3/Hmcn1/Cst3/Ccn2/Chad/Thbs1/Smoc1/Ccdc80/Eln/Angpt1/Serpinf1/Ltbp2/Loxl1/Comp/Ccn1/Tgfb3/Mgp/Col8a1/Ogn/Prelp/Bgn/Fbln1/Col11a1/Alpl/Igf2/Runx1/Col8a2/Abi3bp/Adamtsl3/Fbn2/Ltbp4/Omd/Ltbp3/Mfap2
TM_pom_CC_GO:0031012	TM_pom	CC	GO:0031012	extracellular matrix	98/497	438/15830	2.28e-56	5.78e-54	4.92e-54	20720/16000/21859/19242/545370/271127/64075/14219/13010/14734/80883/20317/67896/17313/16777/13717/14264/13179/21825/11600/22420/56429/16949/13601/12837/21809/18295/13602/12111/16997/12643/17926/20200/29817/12394/16012/12814/233744/269959/329941/11647/14119/12822/116847/16002/68169/226255/72713/108075/21808/12845/16852/17150/16007/14114/20348/20195/21922/209378/21817/22418/12835/23876/22417/23888/…	98	98	Active	0.318904	1.60739	0.00997058	0.344255	0.324495	113	tags=39%, list=22%, signal=37%	Myoc/Serpine2/Timp3/Fmod/Gpc3/Hmcn1/Cst3/Ccn2/Chad/Thbs1/Smoc1/Ccdc80/Eln/Angpt1/Serpinf1/Ltbp2/Loxl1/Comp/Ccn1/Tgfb3/Mgp/Col8a1/Ogn/Prelp/Bgn/Fbln1/Col11a1/Alpl/Igf2/Runx1/Col8a2/Abi3bp/Adamtsl3/Fbn2/Ltbp4/Omd/Ltbp3/Mfap2
TM_pom_CC_GO:0062023	TM_pom	CC	GO:0062023	collagen-containing extracellular matrix	83/497	336/15830	3.52e-51	4.74e-49	4.04e-49	20720/16000/21859/19242/545370/64075/13010/14734/80883/20317/67896/17313/16777/13717/14264/13179/21825/11600/56429/16949/13601/12837/21809/18295/13602/12111/16997/17926/20200/29817/12394/16012/12814/233744/329941/14119/12822/116847/16002/226255/72713/108075/21808/12845/16852/17150/16007/14114/20348/20195/209378/21817/12835/23876/23888/654812/16998/27047/12832/224697/76477/320712/21857/107250/1677…	83	83	Active	0.338651	1.65946	0.00821963	0.344255	0.324495	71	tags=30%, list=14%, signal=31%	Myoc/Serpine2/Timp3/Fmod/Gpc3/Hmcn1/Cst3/Thbs1/Smoc1/Ccdc80/Eln/Angpt1/Serpinf1/Ltbp2/Loxl1/Comp/Ccn1/Tgfb3/Mgp/Col8a1/Ogn/Prelp/Bgn/Fbln1/Col11a1
TM_pom_CC_GO:0005604	TM_pom	CC	GO:0005604	basement membrane	22/497	113/15830	5.59e-12	5.64e-10	4.81e-10	21859/19242/545370/64075/13010/80883/20317/67896/16777/16949/12837/12394/329941/12822/226255/21808/14114/21857/16779/12819/12831/18073	22	22	Active	0.420025	1.49967	0.0621185	0.552565	0.520848	92	tags=50%, list=18%, signal=43%	Timp3/Hmcn1/Cst3/Smoc1/Ccdc80/Serpinf1/Loxl1/Col8a1/Fbln1/Runx1/Col8a2
TM_pom_CC_GO:0045121	TM_pom	CC	GO:0045121	membrane raft	28/497	356/15830	8.25e-06	0.000351382	0.00029938	98660/19762/11600/12876/67916/19223/14683/13649/14758/15894/14609/16974/19012/67972/11461/17999/14062/16832/12385/16001/22146/15481/240725/13629/11826/50768/19084/193740	28	28	Active	0.154501	0.587238	0.936023	0.999687	0.942306	168	tags=43%, list=33%, signal=30%	Angpt1/Ptgis/Plpp3/Cpe/Icam1/Lrp6/Gnas/Tuba1c/Plpp1/Ctnna1/F2r/Egfr
TM_pom_CC_GO:0098857	TM_pom	CC	GO:0098857	membrane microdomain	28/497	357/15830	8.7e-06	0.000351382	0.00029938	98660/19762/11600/12876/67916/19223/14683/13649/14758/15894/14609/16974/19012/67972/11461/17999/14062/16832/12385/16001/22146/15481/240725/13629/11826/50768/19084/193740	28	28	Active	0.154501	0.587238	0.936023	0.999687	0.942306	168	tags=43%, list=33%, signal=30%	Angpt1/Ptgis/Plpp3/Cpe/Icam1/Lrp6/Gnas/Tuba1c/Plpp1/Ctnna1/F2r/Egfr
TM_pom_CC_GO:0032432	TM_pom	CC	GO:0032432	actin filament bundle	12/497	87/15830	1.68e-05	0.000615928	0.000524774	11475/107589/12955/77579/218952/98932/11461/213019/76566/13518/17886/50768	12	12	Active	0.248	0.737214	0.78459	0.999687	0.942306	388	tags=100%, list=76%, signal=25%	Myh10/Cryab/Mylk/Pdlim2/Acta2/Rflnb/Myl9/Myh9/Dlc1/Dst/Fermt2/Actb
TM_pom_CC_GO:0043292	TM_pom	CC	GO:0043292	contractile fiber	18/497	203/15830	7.47e-05	0.00225964	0.00192522	13010/225115/11475/12955/13167/14609/13346/11465/98932/208727/213019/17260/20742/13518/12289/13008/319565/13007	18	18	Active	0.204453	0.686604	0.839711	0.999687	0.942306	411	tags=100%, list=80%, signal=20%	Cst3/Svil/Dbi/Cryab/Pdlim2/Acta2/Sptbn1/Myl9/Cacna1d/Syne2/Dst/Hdac4/Actg1/Gja1/Des/Mef2c/Csrp1/Csrp2
TM_pom_CC_GO:0042641	TM_pom	CC	GO:0042641	actomyosin	11/497	87/15830	8.49e-05	0.00228752	0.00194898	11475/107589/77579/218952/98932/11461/208727/213019/13518/17886/50768	11	11	Active	0.247505	0.716275	0.800408	0.999687	0.942306	388	tags=100%, list=76%, signal=25%	Myh10/Mylk/Pdlim2/Acta2/Myl9/Myh9/Dlc1/Dst/Hdac4/Fermt2/Actb
TM_pom_CC_GO:0001725	TM_pom	CC	GO:0001725	stress fiber	10/497	78/15830	0.000157704	0.00374778	0.00319313	11475/107589/77579/218952/98932/11461/213019/13518/17886/50768	10	10	Active	0.247012	0.693814	0.828683	0.999687	0.942306	388	tags=100%, list=76%, signal=25%	Myh10/Mylk/Pdlim2/Acta2/Myl9/Myh9/Dlc1/Dst/Fermt2/Actb
TM_pom_CC_GO:0097517	TM_pom	CC	GO:0097517	contractile actin filament bundle	10/497	78/15830	0.000157704	0.00374778	0.00319313	11475/107589/77579/218952/98932/11461/213019/13518/17886/50768	10	10	Active	0.247012	0.693814	0.828683	0.999687	0.942306	388	tags=100%, list=76%, signal=25%	Myh10/Mylk/Pdlim2/Acta2/Myl9/Myh9/Dlc1/Dst/Fermt2/Actb
TM_pom_CC_GO:0015629	TM_pom	CC	GO:0015629	actin cytoskeleton	29/497	462/15830	0.000328159	0.0071004	0.00604959	12741/225115/11475/11867/107589/12955/211401/17904/19684/109624/12332/77579/98267/11465/218952/98932/11461/208727/213019/12385/76566/20742/13518/11856/17886/13822/260409/50768/13007	29	29	Active	0.130306	0.498338	0.976935	0.999687	0.942306	174	tags=41%, list=34%, signal=29%	Svil/Arpc1b/Myh10/Cryab/Mylk/Stk17b/Rdx/Myl6/Pdlim2/Acta2/Ctnna1/Cald1
TM_pom_CC_GO:0005581	TM_pom	CC	GO:0005581	collagen trimer	17/497	73/15830	7.43e-11	6.01e-09	5.12e-09	13179/12837/12814/329941/12822/12835/12832/237759/373864/16948/17022/12819/107581/140792/12831/12843/12842	17	17	Suppressed	-0.35718	-1.23376	0.220536	0.705176	0.664699	143	tags=53%, list=28%, signal=39%	Col18a1/Col23a1/Lum/Col1a2/Col5a1/Dcn/Col1a1/Col6a3/Col5a2
TM_pom_CC_GO:0005583	TM_pom	CC	GO:0005583	fibrillar collagen trimer	8/497	11/15830	1.36e-10	7.83e-09	6.67e-09	12814/12832/373864/17022/107581/12831/12843/12842	8	8	Suppressed	-0.494998	-1.33315	0.165772	0.705176	0.664699	122	tags=62%, list=24%, signal=48%	Lum/Col1a2/Col5a1/Col1a1/Col5a2
TM_pom_CC_GO:0098643	TM_pom	CC	GO:0098643	banded collagen fibril	8/497	11/15830	1.36e-10	7.83e-09	6.67e-09	12814/12832/373864/17022/107581/12831/12843/12842	8	8	Suppressed	-0.494998	-1.33315	0.165772	0.705176	0.664699	122	tags=62%, list=24%, signal=48%	Lum/Col1a2/Col5a1/Col1a1/Col5a2
TM_pom_CC_GO:0098644	TM_pom	CC	GO:0098644	complex of collagen trimers	8/497	17/15830	1.69e-08	8.54e-07	7.28e-07	12814/12832/373864/17022/107581/12831/12843/12842	8	8	Suppressed	-0.494998	-1.33315	0.165772	0.705176	0.664699	122	tags=62%, list=24%, signal=48%	Lum/Col1a2/Col5a1/Col1a1/Col5a2
TM_pom_CC_GO:0043209	TM_pom	CC	GO:0043209	myelin sheath	19/497	203/15830	2.25e-05	0.000756269	0.000644346	98660/12741/17926/12709/218442/12955/22187/268373/19684/11465/11461/16832/17988/14645/11898/15481/17967/21881/12043	19	19	Suppressed	-0.262068	-0.940609	0.534198	0.886212	0.835344	82	tags=26%, list=16%, signal=23%	Serinc5/Tkt/Ckb/Cldn5/Atp1a2
TM_pom_CC_GO:0005911	TM_pom	CC	GO:0005911	cell-cell junction	31/497	468/15830	7.83e-05	0.00225964	0.00192522	98660/545370/12741/68655/107589/21844/211401/18671/19684/14609/13346/396184/21872/380928/11465/218952/11461/20266/18708/213019/12385/17988/18133/13518/22323/77446/17967/50791/17886/19159/53620	31	31	Suppressed	-0.182324	-0.757575	0.789979	0.999687	0.942306	136	tags=35%, list=27%, signal=28%	Fermt2/Actg1/Gja1/Actb/Des/Lmo7/Tjp1/Mtss1/Abcb1a/Cldn5/Atp1a2
TM_pom_CC_GO:0042383	TM_pom	CC	GO:0042383	sarcolemma	14/497	153/15830	0.00033393	0.0071004	0.00604959	98660/12293/21809/12111/14683/19684/13346/12835/19091/20266/16001/13518/12289/11826	14	14	Suppressed	-0.387107	-1.25564	0.205895	0.705176	0.664699	33	tags=21%, list=6%, signal=21%	Col6a3/Cacna2d1/Atp1a2
TM_pom_MF_GO:0005201	TM_pom	MF	GO:0005201	extracellular matrix structural constituent	41/483	130/15576	2.47e-30	1.67e-27	1.46e-27	545370/16777/13717/13179/21825/56429/13601/12837/18295/12111/16997/29817/16012/12814/233744/329941/14119/12822/116847/108075/12845/17150/14114/12835/23876/12832/76477/320712/16779/237759/373864/50706/17022/12819/107581/14115/12831/18073/12843/12842/68792	41	41	Active	0.268435	1.1209	0.308765	0.842465	0.842465	113	tags=39%, list=22%, signal=33%	Hmcn1/Thbs1/Eln/Ltbp2/Comp/Col8a1/Ogn/Prelp/Bgn/Fbln1/Col11a1/Col8a2/Abi3bp/Fbn2/Ltbp4/Mfap2
TM_pom_MF_GO:0005539	TM_pom	MF	GO:0005539	glycosaminoglycan binding	35/483	187/15576	6.5e-18	1.46e-15	1.28e-15	20720/19242/64075/14219/67896/17242/13179/21825/12111/16997/72780/12814/116847/68169/268373/18542/12845/16007/21922/12159/76477/78892/15945/18187/320712/237759/50706/18133/20564/70370/11816/17967/240725/20377/12831	35	35	Active	0.422463	1.6914	0.013296	0.586686	0.586686	74	tags=40%, list=14%, signal=37%	Serpine2/Ccn2/Thbs1/Smoc1/Ccdc80/Cxcl10/Mdk/Ltbp2/Comp/Ccn1/Prelp/Bgn/Col11a1/Rspo3
TM_pom_MF_GO:0008201	TM_pom	MF	GO:0008201	heparin binding	31/483	142/15576	5.15e-18	1.46e-15	1.28e-15	20720/19242/64075/14219/67896/17242/21825/16997/72780/12814/116847/68169/18542/12845/16007/21922/12159/76477/78892/15945/18187/320712/237759/50706/18133/20564/70370/11816/17967/20377/12831	31	31	Active	0.43443	1.69156	0.0162304	0.590729	0.590729	74	tags=42%, list=14%, signal=38%	Serpine2/Ccn2/Thbs1/Smoc1/Ccdc80/Cxcl10/Mdk/Ltbp2/Comp/Ccn1/Prelp/Col11a1/Rspo3
TM_pom_MF_GO:1901681	TM_pom	MF	GO:1901681	sulfur compound binding	36/483	235/15576	1.69e-15	2.28e-13	1.99e-13	20720/21366/19242/64075/14219/67896/17242/21825/16997/72780/12814/13167/116847/68169/268373/18542/12845/16007/21922/12159/12490/76477/78892/15945/18187/320712/237759/50706/18133/20564/70370/11816/17967/21881/20377/12831	36	36	Active	0.430343	1.73833	0.00835655	0.421409	0.421409	99	tags=47%, list=19%, signal=41%	Slc6a6/Serpine2/Ccn2/Thbs1/Smoc1/Ccdc80/Cxcl10/Mdk/Ltbp2/Comp/Ccn1/Prelp/Col11a1/Rspo3/Dbi/Pcolce/Abi3bp
TM_pom_MF_GO:0048018	TM_pom	MF	GO:0048018	receptor ligand activity	40/483	341/15576	4.09e-13	3.45e-11	3.02e-11	16000/19242/22409/78896/14219/17242/22420/21809/59027/18295/110075/50518/20319/13616/14456/16002/14560/20315/15234/21808/17965/20750/18654/66208/20348/17311/22418/12159/22417/15945/106014/14825/21857/22411/18133/20256/22341/18205/170458/69638	40	40	Active	0.303316	1.25501	0.179443	0.828316	0.828316	54	tags=28%, list=11%, signal=27%	Ecrg4/Sfrp2/Ccn2/Cxcl10/Gpha2/Mdk/Tgfb3/Cxcl12/Pgf/Ogn/Gas6
TM_pom_MF_GO:0050839	TM_pom	MF	GO:0050839	cell adhesion molecule binding	35/483	265/15576	3.96e-13	3.45e-11	3.02e-11	16000/19242/13723/14219/80883/16777/21825/12876/67916/54366/19266/17470/16002/20315/268373/12845/20750/16007/14114/13649/15894/23876/21872/218952/23965/16779/223272/50706/12385/17988/18133/18007/107581/17886/100038882	35	35	Active	0.337481	1.35117	0.122288	0.828316	0.828316	93	tags=43%, list=18%, signal=38%	Emb/Ccn2/Thbs1/Ctnnal1/Comp/Plpp3/Ccn1/Cxcl12/Ptprd/Cpe/Fbln1/Cd200/Itgbl1/Igf2/Icam1
TM_pom_MF_GO:0030546	TM_pom	MF	GO:0030546	signaling receptor activator activity	40/483	346/15576	6.58e-13	4.93e-11	4.31e-11	16000/19242/22409/78896/14219/17242/22420/21809/59027/18295/110075/50518/20319/13616/14456/16002/14560/20315/15234/21808/17965/20750/18654/66208/20348/17311/22418/12159/22417/15945/106014/14825/21857/22411/18133/20256/22341/18205/170458/69638	40	40	Active	0.303316	1.25501	0.179443	0.828316	0.828316	54	tags=28%, list=11%, signal=27%	Ecrg4/Sfrp2/Ccn2/Cxcl10/Gpha2/Mdk/Tgfb3/Cxcl12/Pgf/Ogn/Gas6
TM_pom_MF_GO:0001968	TM_pom	MF	GO:0001968	fibronectin binding	10/483	32/15576	2.62e-08	1.26e-06	1.1e-06	14219/67896/16011/21825/17926/16012/12845/17150/14114/13038	10	10	Active	0.754741	2.12076	0.000730594	0.22464	0.22464	66	tags=70%, list=13%, signal=62%	Myoc/Ccn2/Thbs1/Ccdc80/Igfbp5/Comp/Fbln1
TM_pom_MF_GO:0005520	TM_pom	MF	GO:0005520	insulin-like growth factor binding	9/483	27/15576	7.01e-08	3.15e-06	2.76e-06	14219/16011/29817/16012/16010/16007/107250/18133/16001	9	9	Active	0.573134	1.5573	0.0523043	0.828316	0.828316	170	tags=78%, list=33%, signal=53%	Ccn2/Igfbp5/Ccn1/Igfbp4/Igfbp6/Igfbp7/Kazald1
TM_pom_MF_GO:0050840	TM_pom	MF	GO:0050840	extracellular matrix binding	12/483	57/15576	1.37e-07	5.78e-06	5.05e-06	64075/13717/13179/21825/13601/13602/12111/20750/16852/16007/14115/18073	12	12	Active	0.424568	1.26259	0.204771	0.828316	0.828316	63	tags=42%, list=12%, signal=37%	Thbs1/Smoc1/Eln/Ccn1/Bgn
TM_pom_MF_GO:0005518	TM_pom	MF	GO:0005518	collagen binding	12/483	68/15576	1.04e-06	4.11e-05	3.59e-05	13179/21825/13602/18542/12845/11568/76477/320712/16948/17022/13038/18073	12	12	Active	0.24483	0.728081	0.788073	0.965064	0.965064	99	tags=33%, list=19%, signal=28%	Thbs1/Comp/Pcolce/Abi3bp
TM_pom_MF_GO:0042056	TM_pom	MF	GO:0042056	chemoattractant activity	7/483	27/15576	1.37e-05	0.000460761	0.000402977	15234/18654/22418/12159/15945/22341/18205	7	7	Active	0.411455	1.02309	0.4309	0.849764	0.849764	51	tags=29%, list=10%, signal=26%	Cxcl10/Pgf
TM_pom_MF_GO:0031994	TM_pom	MF	GO:0031994	insulin-like growth factor I binding	4/483	12/15576	0.000370742	0.00861655	0.00753595	16011/16012/16010/16001	4	4	Active	0.63352	1.30668	0.172335	0.828316	0.828316	128	tags=75%, list=25%, signal=57%	Igfbp5/Igfbp4/Igfbp6
TM_pom_MF_GO:0019838	TM_pom	MF	GO:0019838	growth factor binding	29/483	134/15576	8.01e-17	1.35e-14	1.18e-14	19242/14219/16011/21825/18212/18595/21809/16997/19252/29817/16012/14184/58249/16157/108075/16010/16007/13649/16998/107250/232345/18133/16001/18213/18205/12831/12843/12842/68792	29	29	Suppressed	-0.331087	-1.34824	0.119292	0.828316	0.828316	66	tags=28%, list=13%, signal=25%	Fibp/Col5a1/Dusp1/Col1a1/Pdgfra/Ntrk2/A2m/Ptn
TM_pom_MF_GO:0030545	TM_pom	MF	GO:0030545	receptor regulator activity	45/483	381/15576	9.98e-15	1.12e-12	9.8e-13	16000/19242/22409/78896/14219/17242/22420/21809/59027/18295/110075/50518/20319/13616/14456/16002/14560/20315/15234/56811/21808/17965/20750/18654/66208/20348/17311/22418/50781/12159/22417/15945/106014/14825/21857/72585/22411/18133/20256/22341/18205/110074/170458/69638/110454	45	45	Suppressed	-0.281424	-1.28193	0.141013	0.828316	0.828316	97	tags=38%, list=19%, signal=34%	Tafa5/Sema3c/Hgf/Tgfb2/Wnt5a/Wnt4/Bmp3/Dkk2/Cxcl1/Nbl1/Edn3/Ly6a/Wnt6/Nampt/Wnt10a/Igf1/Ptn
TM_pom_MF_GO:0008083	TM_pom	MF	GO:0008083	growth factor activity	22/483	114/15576	5.24e-12	3.53e-10	3.09e-10	16000/19242/14219/17242/21809/18295/110075/16002/14560/20315/15234/21808/18654/66208/17311/12159/14825/21857/18133/20256/22341/18205	22	22	Suppressed	-0.30837	-1.15691	0.284785	0.828316	0.828316	5	tags=32%, list=1%, signal=33%	Kitl/Hgf/Tgfb2/Bmp3/Cxcl1/Igf1/Ptn
TM_pom_MF_GO:0005178	TM_pom	MF	GO:0005178	integrin binding	23/483	128/15576	8.1e-12	4.96e-10	4.34e-10	16000/19242/14219/16777/21825/67916/16002/20315/268373/12845/20750/16007/14114/13649/15894/23876/218952/16779/223272/18133/107581/17886/100038882	23	23	Suppressed	-0.301435	-1.14834	0.287439	0.828316	0.828316	27	tags=13%, list=5%, signal=13%	Lamb1/Igf1/Ptn
TM_pom_MF_GO:0030020	TM_pom	MF	GO:0030020	extracellular matrix structural constituent conferring tensile strength	12/483	38/15576	8.98e-10	5.04e-08	4.41e-08	12837/12814/12822/12835/12832/237759/373864/12819/107581/12831/12843/12842	12	12	Suppressed	-0.398421	-1.24169	0.216074	0.828316	0.828316	143	tags=58%, list=28%, signal=43%	Col18a1/Col23a1/Col1a2/Col5a1/Col1a1/Col6a3/Col5a2
TM_pom_MF_GO:0005109	TM_pom	MF	GO:0005109	frizzled binding	11/483	35/15576	4.84e-09	2.51e-07	2.2e-07	22409/22420/17926/72780/14362/16974/22418/22417/68010/22411/20377	11	11	Suppressed	-0.34134	-1.0332	0.422782	0.847108	0.847108	81	tags=45%, list=16%, signal=39%	Wnt5a/Wnt4/Bambi/Wnt6/Wnt10a
TM_pom_MF_GO:0005125	TM_pom	MF	GO:0005125	cytokine activity	18/483	156/15576	1.66e-06	6.23e-05	5.45e-05	22409/22420/21809/59027/110075/14560/20315/21808/20750/17311/22418/12159/22417/15945/106014/14825/21857/22411	18	18	Suppressed	-0.415934	-1.46789	0.0815499	0.828316	0.828316	105	tags=56%, list=21%, signal=46%	Kitl/Tafa5/Tgfb2/Wnt5a/Wnt4/Bmp3/Cxcl1/Wnt6/Nampt/Wnt10a
TM_pom_MF_GO:0001664	TM_pom	MF	GO:0001664	G protein-coupled receptor binding	23/483	252/15576	3.9e-06	0.000138263	0.000120924	22409/22420/17926/50518/14683/72780/13616/14362/20315/16974/22418/22417/68010/15945/106014/14825/18008/22411/15481/50791/20377/170458/193740	23	23	Suppressed	-0.251281	-0.957277	0.516833	0.888403	0.888403	81	tags=39%, list=16%, signal=34%	Tafa5/Wnt5a/Hspa1a/Wnt4/Cxcl1/Bambi/Edn3/Wnt6/Wnt10a
TM_pom_MF_GO:0001228	TM_pom	MF	GO:0001228	DNA-binding transcription activator activity, RNA polymerase II-specific	29/483	412/15576	3.62e-05	0.0011619	0.00101619	21807/18032/21413/12394/13653/17285/14238/16478/12608/24136/14009/16362/22634/20666/16600/18741/20682/11835/17260/21406/21416/17701/16658/208647/50794/20677/23849/13591/15370	29	29	Suppressed	-0.15942	-0.649185	0.899814	0.985684	0.985684	436	tags=83%, list=85%, signal=13%	Mafb/Egr1/Sox11/Ar/Msx1/Pitx2/Tcf7l2/Sox9/Plagl1/Sox4/Klf13/Nr4a1/Creb3l2/Klf6/Tcf12/Jund/Etv1/Meox1/Klf4/Zeb2/Mef2c/Tcf4/Cebpb/Ebf1
TM_pom_MF_GO:0001216	TM_pom	MF	GO:0001216	DNA-binding transcription activator activity	29/483	417/15576	4.5e-05	0.00137977	0.00120673	21807/18032/21413/12394/13653/17285/14238/16478/12608/24136/14009/16362/22634/20666/16600/18741/20682/11835/17260/21406/21416/17701/16658/208647/50794/20677/23849/13591/15370	29	29	Suppressed	-0.15942	-0.649185	0.899814	0.985684	0.985684	436	tags=83%, list=85%, signal=13%	Mafb/Egr1/Sox11/Ar/Msx1/Pitx2/Tcf7l2/Sox9/Plagl1/Sox4/Klf13/Nr4a1/Creb3l2/Klf6/Tcf12/Jund/Etv1/Meox1/Klf4/Zeb2/Mef2c/Tcf4/Cebpb/Ebf1
TM_pom_MF_GO:0043394	TM_pom	MF	GO:0043394	proteoglycan binding	7/483	36/15576	0.000100935	0.00295784	0.0025869	19242/12845/70370/11816/12831/13038/18073	7	7	Suppressed	-0.514663	-1.32743	0.166269	0.828316	0.828316	59	tags=29%, list=12%, signal=26%	Col5a1/Ptn
TM_pom_MF_GO:0039706	TM_pom	MF	GO:0039706	co-receptor binding	4/483	10/15576	0.000165266	0.00445557	0.00389679	56811/50781/12159/18007	4	4	Suppressed	-0.495383	-1.04912	0.402954	0.847108	0.847108	165	tags=75%, list=32%, signal=51%	Bmp4/Dkk3/Dkk2
TM_pom_MF_GO:0140297	TM_pom	MF	GO:0140297	DNA-binding transcription factor binding	26/483	383/15576	0.000163348	0.00445557	0.00389679	21413/15902/12394/16478/12608/11461/20893/208727/18708/21386/16600/18741/20682/15205/11835/17260/21406/21416/18035/268903/218772/22781/12043/12419/15370/193740	26	26	Suppressed	-0.215949	-0.852187	0.667056	0.953959	0.953959	298	tags=85%, list=58%, signal=37%	Ar/Pitx2/Ikzf4/Tcf7l2/Sox9/Bcl2/Cbx5/Hes1/Nr4a1/Rarb/Nrip1/Hdac4/Tcf12/Tbx3/Jund/Klf4/Actb/Bhlhe40/Mef2c/Tcf4/Hspa1a/Cebpb
TM_pom_MF_GO:0043121	TM_pom	MF	GO:0043121	neurotrophin binding	4/483	11/15576	0.000253351	0.00656765	0.005744	18212/232345/18213/18205	4	4	Suppressed	-0.838111	-1.77496	0.00400844	0.282996	0.282996	18	tags=50%, list=4%, signal=49%	Ntrk2/A2m
TM_pom_MF_GO:0005200	TM_pom	MF	GO:0005200	structural constituent of cytoskeleton	8/483	56/15576	0.000309741	0.00773205	0.00676238	11867/13346/67951/11465/11461/20742/22146/22352	8	8	Suppressed	-0.359237	-0.973719	0.490676	0.88825	0.88825	133	tags=62%, list=26%, signal=47%	Actg1/Actb/Tubb6/Des/Vim
TM_pom_MF_GO:0048407	TM_pom	MF	GO:0048407	platelet-derived growth factor binding	4/483	12/15576	0.000370742	0.00861655	0.00753595	18595/12831/12843/12842	4	4	Suppressed	-0.809055	-1.71342	0.00801688	0.421409	0.421409	102	tags=100%, list=20%, signal=81%	Col5a1/Col1a1/Pdgfra
TM1_BP_GO:0030198	TM1	BP	GO:0030198	extracellular matrix organization	75/729	280/15707	9.6e-37	2.04e-33	1.48e-33	14268/12843/12842/11568/16007/20319/329941/107581/12837/23876/17022/17392/67896/54156/12845/54409/17390/16949/407800/14114/12832/50706/654812/14758/76293/16998/237759/269959/26561/53381/20289/21808/12818/18451/15530/12406/11820/14238/57764/12829/26427/56693/74199/21803/12828/11504/13078/17300/18595/77739/71602/16779/16854/14726/12831/14230/18073/399558/14219/216725/14042/78892/16777/14115/207596/…	75	75	Active	0.509708	2.14515	0.000123153	0.0953827	0.0912177	170	tags=51%, list=22%, signal=44%	Mmp3/Sfrp2/Col1a1/Col1a2/Fn1/Ccn1/Aebp1/Comp/Col8a2/Col8a1/Lum/Col16a1/Postn/Fbln5/Mmp2/Angptl7/Col14a1/Ccdc80/Fbln1/Col5a2/Loxl1/Mfap4/Ecm2/Egfl6/Prdx4/Ltbp3/Serpinh1/Gpm6b/Hspg2/Abi3bp/Tgfb2/P4ha1/Col4a4/Ntn4/Tgfb1/Adamtsl3/Mmp23/App
TM1_BP_GO:0043062	TM1	BP	GO:0043062	extracellular structure organization	75/729	281/15707	1.25e-36	2.04e-33	1.48e-33	14268/12843/12842/11568/16007/20319/329941/107581/12837/23876/17022/17392/67896/54156/12845/54409/17390/16949/407800/14114/12832/50706/654812/14758/76293/16998/237759/269959/26561/53381/20289/21808/12818/18451/15530/12406/11820/14238/57764/12829/26427/56693/74199/21803/12828/11504/13078/17300/18595/77739/71602/16779/16854/14726/12831/14230/18073/399558/14219/216725/14042/78892/16777/14115/207596/…	75	75	Active	0.509708	2.14515	0.000123153	0.0953827	0.0912177	170	tags=51%, list=22%, signal=44%	Mmp3/Sfrp2/Col1a1/Col1a2/Fn1/Ccn1/Aebp1/Comp/Col8a2/Col8a1/Lum/Col16a1/Postn/Fbln5/Mmp2/Angptl7/Col14a1/Ccdc80/Fbln1/Col5a2/Loxl1/Mfap4/Ecm2/Egfl6/Prdx4/Ltbp3/Serpinh1/Gpm6b/Hspg2/Abi3bp/Tgfb2/P4ha1/Col4a4/Ntn4/Tgfb1/Adamtsl3/Mmp23/App
TM1_BP_GO:0045229	TM1	BP	GO:0045229	external encapsulating structure organization	75/729	281/15707	1.25e-36	2.04e-33	1.48e-33	14268/12843/12842/11568/16007/20319/329941/107581/12837/23876/17022/17392/67896/54156/12845/54409/17390/16949/407800/14114/12832/50706/654812/14758/76293/16998/237759/269959/26561/53381/20289/21808/12818/18451/15530/12406/11820/14238/57764/12829/26427/56693/74199/21803/12828/11504/13078/17300/18595/77739/71602/16779/16854/14726/12831/14230/18073/399558/14219/216725/14042/78892/16777/14115/207596/…	75	75	Active	0.509708	2.14515	0.000123153	0.0953827	0.0912177	170	tags=51%, list=22%, signal=44%	Mmp3/Sfrp2/Col1a1/Col1a2/Fn1/Ccn1/Aebp1/Comp/Col8a2/Col8a1/Lum/Col16a1/Postn/Fbln5/Mmp2/Angptl7/Col14a1/Ccdc80/Fbln1/Col5a2/Loxl1/Mfap4/Ecm2/Egfl6/Prdx4/Ltbp3/Serpinh1/Gpm6b/Hspg2/Abi3bp/Tgfb2/P4ha1/Col4a4/Ntn4/Tgfb1/Adamtsl3/Mmp23/App
TM1_BP_GO:0009611	TM1	BP	GO:0009611	response to wounding	71/729	429/15707	3.34e-21	4.07e-18	2.95e-18	78896/14268/21825/12842/16007/14456/17183/17242/12845/17390/14114/18039/12258/12527/27973/11826/21808/235505/18590/226101/21923/21803/19124/13649/15289/67916/21857/18595/107351/20971/16779/14726/192176/66175/12831/20312/14230/21824/13052/11475/22340/15200/14042/16948/16952/11747/14683/18783/27279/67866/68585/218952/77579/12192/22402/22417/22418/16476/22695/15251/107589/17319/66961/19716/16412/141…	71	71	Active	0.304864	1.27189	0.147179	0.670707	0.64142	140	tags=24%, list=18%, signal=22%	Ecrg4/Col1a1/Fn1/Thbs1/Ccn1/Gas6/Comp/Matn4/Mmp2/Fbln1/Aqp1/Serping1/Vkorc1/Cd9/Nefl/Tnc/Tgfb2
TM1_BP_GO:0001501	TM1	BP	GO:0001501	skeletal system development	72/729	456/15707	2.79e-20	2.72e-17	1.97e-17	12843/20692/21825/12842/12111/16007/20319/17926/17242/12643/232174/14313/21809/20377/12845/17390/17313/13601/12832/13038/14451/16998/18933/19662/14172/27973/216616/20289/18162/13386/21808/19035/11647/15530/12406/22160/20204/12394/18590/73121/21803/15211/15212/17300/18595/18133/218772/16854/102866/66175/14219/14042/16948/116701/14683/21813/11848/20340/20677/12577/18028/18552/22402/22418/14183/1525…	72	72	Active	0.450503	1.88335	0.00123808	0.151709	0.145084	178	tags=46%, list=23%, signal=39%	Sfrp2/Col1a1/Sparc/Col1a2/Thbs1/Chad/Myoc/Ccn1/Comp/Bgn/Cyp26b1/Mmp2/Sfrp1/Tgfb3/Fst/Gas1/Ctsk/Col5a2/Mgp/Ltbp3/Vkorc1/Serpinh1/Hspg2/Dlk1/Prrx1/Tgfb2/Fgf18/Tgfb1/Ccn3/Twist1/Cdkn1c/Runx1/Scx
TM1_BP_GO:0001503	TM1	BP	GO:0001503	ossification	61/729	362/15707	9.72e-19	7.89e-16	5.73e-16	12843/12842/16007/20319/17926/17242/20256/68713/20377/12845/27047/16477/15081/14362/17390/17313/13601/100038882/14758/16998/12608/14172/20289/12609/13386/16011/66695/11647/15530/22160/26427/12394/73121/21803/17300/15078/68010/15901/114584/14219/242050/14042/16948/68588/14683/225998/50766/11848/218952/14734/433938/67399/22402/22417/22418/14183/15251/22057/20750/14184/20148	61	61	Active	0.302727	1.23139	0.190494	0.707405	0.676516	133	tags=28%, list=17%, signal=25%	Sfrp2/Col1a1/Col1a2/Myoc/Ccn1/Comp/Clec11a/Omd/Mmp2/Sfrp1/Fzd1/Mgp/Aspn/Ltbp3/Gpm6b/Hspg2/Dlk1
TM1_BP_GO:0042060	TM1	BP	GO:0042060	wound healing	56/729	314/15707	1.88e-18	1.31e-15	9.5e-16	14268/21825/12842/16007/14456/12845/14114/12258/12527/27973/11826/21808/235505/18590/226101/21803/19124/13649/15289/67916/21857/18595/107351/20971/14726/192176/66175/12831/20312/14230/21824/13052/11475/22340/15200/14042/16948/16952/11747/14683/18783/27279/67866/218952/77579/22402/22417/22418/15251/107589/16412/12476/15368/14775/68169/20296	56	56	Active	0.282905	1.13367	0.296855	0.771673	0.737977	255	tags=46%, list=33%, signal=33%	Col1a1/Fn1/Thbs1/Ccn1/Gas6/Comp/Fbln1/Aqp1/Serping1/Vkorc1/Cd9/Tgfb2/Tgfb1/Timp1/Hbegf/Cd109/Sdc4/Myof/Plpp3/Pdgfa/Cxadr/Anxa1/Pla2g4a/Kank1/Col5a1/Cx3cl1
TM1_BP_GO:1901342	TM1	BP	GO:1901342	regulation of vasculature development	51/729	276/15707	1.41e-17	8.56e-15	6.21e-15	13179/20692/20317/21825/20319/12654/64103/17242/21826/23876/54409/13601/18654/13036/654812/14172/73230/11826/21808/15945/26427/19223/12394/12828/11504/15289/13078/17300/18186/16854/15901/14645/20312/15234/20620/22340/21813/27279/68585/13731/58861/22417/22418/15251/53614/20193/12226/16412/11852/15368/20296	51	51	Active	0.37039	1.45799	0.0574728	0.533246	0.509962	68	tags=20%, list=9%, signal=19%	Sfrp2/Sparc/Tnmd/Chil1/Thbs1/Serpinf1/Dcn/Thbs2/Fbln5/Angptl7
TM1_BP_GO:0030199	TM1	BP	GO:0030199	collagen fibril organization	23/729	57/15707	1.83e-16	8.9e-14	6.46e-14	12843/12842/11568/20319/17022/12845/16949/12832/20289/21808/12818/18451/12406/56693/13078/17300/12831/14230/216725/14042/16948/81877/16917	23	23	Active	0.610802	2.01146	0.000882353	0.151709	0.145084	144	tags=52%, list=19%, signal=44%	Sfrp2/Col1a1/Col1a2/Aebp1/Comp/Lum/Col14a1/Col5a2/Loxl1/Serpinh1/Tgfb2/P4ha1
TM1_BP_GO:0045765	TM1	BP	GO:0045765	regulation of angiogenesis	49/729	272/15707	1.81e-16	8.9e-14	6.46e-14	13179/20692/20317/21825/20319/12654/64103/17242/21826/23876/54409/13601/18654/13036/14172/73230/11826/21808/15945/26427/19223/12394/12828/11504/15289/13078/17300/18186/16854/15901/14645/20312/15234/20620/22340/21813/27279/68585/13731/58861/22418/15251/53614/20193/12226/16412/11852/15368/20296	49	49	Active	0.378383	1.47863	0.0515531	0.533246	0.509962	34	tags=16%, list=4%, signal=17%	Sfrp2/Sparc/Tnmd/Chil1/Thbs1/Serpinf1/Dcn/Thbs2
TM1_BP_GO:0050673	TM1	BP	GO:0050673	epithelial cell proliferation	61/729	410/15707	4.62e-16	2.05e-13	1.49e-13	20692/20317/20315/21825/20319/329941/64103/56213/17242/12837/14313/20377/21828/13601/18654/11819/14451/12608/14172/56312/73230/13386/16011/21808/235505/11534/22160/21803/18103/13649/12828/15289/18133/16010/15901/14645/15234/13052/22340/15312/15370/94275/217166/15205/13057/67866/68585/18028/14734/12192/22418/14183/16476/22695/74155/14184/11835/11983/15368/14775/20296	61	61	Active	0.336828	1.3701	0.0894804	0.60388	0.577511	85	tags=21%, list=11%, signal=21%	Sfrp2/Sparc/Tnmd/Thbs1/Serpinf1/Thbs4/Col8a2/Col8a1/Htra1/Sfrp1/Nupr1/Fst/Gas1
TM1_BP_GO:0032963	TM1	BP	GO:0032963	collagen metabolic process	29/729	100/15707	6.78e-16	2.76e-13	2e-13	14268/12843/12842/21809/17392/114886/17390/13038/76293/14789/26561/52377/20289/12406/26427/21803/15901/12831/14219/216725/81877/17534/22417/74155/15251/16412/14184/54683/20296	29	29	Active	0.48308	1.68406	0.016669	0.35015	0.33486	124	tags=38%, list=16%, signal=33%	Mmp3/Col1a1/Col1a2/Fn1/Mmp2/Tgfb3/Ctsk/Rcn3/Mfap4/P3h3/Serpinh1
TM1_BP_GO:0031589	TM1	BP	GO:0031589	cell-substrate adhesion	52/729	337/15707	1.65e-14	6.2e-12	4.5e-12	14268/21825/12842/16007/14456/11815/223272/17926/17242/107581/12837/18708/67896/54156/20377/407800/14114/50706/14758/23928/57764/74199/13640/20194/18186/107351/20971/18003/16779/14726/192176/18073/12317/14219/18453/16777/14115/16419/81877/11848/27279/218952/13731/18552/320712/22417/12631/11932/20750/16412/22329/68169	52	52	Active	0.467798	1.84703	0.00207147	0.18521	0.177123	150	tags=40%, list=20%, signal=35%	Col1a1/Fn1/Thbs1/Myoc/Ccn1/Apod/Gas6/Itgbl1/Col8a1/Col16a1/Postn/Pik3r1/Sfrp1/Ccdc80/Fbln1/Ecm2/Egfl6/Gpm6b/Abi3bp/S100a10/Ntn4
TM1_BP_GO:0061448	TM1	BP	GO:0061448	connective tissue development	43/729	245/15707	3.47e-14	1.21e-11	8.77e-12	21825/12842/12111/16007/20319/17242/12845/17313/13601/13038/16998/18933/14172/216616/20289/21808/15530/12406/22187/20204/12394/73121/21803/108012/18133/218772/66175/12831/14219/13653/14042/16948/105171/14683/21813/20340/18028/22402/22418/15251/71371/14184/214855	43	43	Active	0.397888	1.5105	0.0457893	0.525648	0.502695	178	tags=42%, list=23%, signal=34%	Sfrp2/Col1a1/Thbs1/Ccn1/Comp/Bgn/Ctsk/Mgp/Ltbp3/Serpinh1/Hspg2/Prrx1/Tgfb2/Fgf18/Tgfb1/Ccn3/Runx1/Scx
TM1_BP_GO:0051216	TM1	BP	GO:0051216	cartilage development	36/729	177/15707	4.29e-14	1.39e-11	1.01e-11	21825/12842/12111/16007/20319/17242/12845/17313/13601/13038/16998/18933/14172/216616/20289/21808/15530/12406/20204/12394/73121/21803/18133/218772/66175/14219/14042/14683/21813/20340/18028/22402/22418/15251/14184/214855	36	36	Active	0.456526	1.66857	0.0149213	0.329307	0.314928	178	tags=50%, list=23%, signal=40%	Sfrp2/Col1a1/Thbs1/Ccn1/Comp/Bgn/Ctsk/Mgp/Ltbp3/Serpinh1/Hspg2/Prrx1/Tgfb2/Fgf18/Tgfb1/Ccn3/Runx1/Scx
TM1_BP_GO:0010810	TM1	BP	GO:0010810	regulation of cell-substrate adhesion	39/729	211/15707	9.84e-14	3e-11	2.17e-11	14268/21825/12842/16007/11815/17926/17242/107581/12837/18708/67896/54156/407800/14114/50706/14758/74199/13640/20194/18186/107351/20971/18003/14726/192176/18073/12317/18453/14115/11848/218952/13731/18552/320712/22417/12631/20750/16412/68169	39	39	Active	0.491898	1.83134	0.00365062	0.194305	0.185821	149	tags=44%, list=20%, signal=37%	Col1a1/Fn1/Thbs1/Myoc/Ccn1/Apod/Col8a1/Col16a1/Postn/Pik3r1/Ccdc80/Fbln1/Ecm2/Egfl6/Gpm6b/Abi3bp/S100a10
TM1_BP_GO:0045785	TM1	BP	GO:0045785	positive regulation of cell adhesion	57/729	415/15707	1.49e-13	4.28e-11	3.11e-11	14268/16008/20315/21825/16007/17926/17242/107581/12837/67896/54156/407800/14114/21817/21808/11534/11906/16362/12394/74199/21803/67916/20194/19159/18186/20971/18003/14726/13848/192176/20312/18073/12317/17909/18453/14115/16952/21813/11848/15205/20677/15505/218952/13731/18552/320712/22417/21950/22418/12631/20750/13641/16412/22329/68169/20296/328365	57	57	Active	0.282841	1.13732	0.292624	0.771593	0.737901	155	tags=28%, list=20%, signal=24%	Igfbp2/Fn1/Thbs1/Myoc/Ccn1/Col8a1/Col16a1/Ccdc80/Fbln1/Ecm2/Egfl6/Abi3bp/Tgfb2/S100a10/Zfhx3/Tgfb1
TM1_BP_GO:0010811	TM1	BP	GO:0010811	positive regulation of cell-substrate adhesion	30/729	130/15707	1.77e-13	4.8e-11	3.48e-11	14268/21825/16007/17926/17242/107581/12837/67896/54156/407800/14114/74199/20194/18186/20971/18003/192176/18073/12317/18453/14115/218952/13731/18552/320712/22417/12631/20750/16412/68169	30	30	Active	0.437658	1.53504	0.045891	0.525648	0.502695	109	tags=33%, list=14%, signal=30%	Fn1/Thbs1/Myoc/Ccn1/Col8a1/Col16a1/Ccdc80/Fbln1/Ecm2/Egfl6
TM1_BP_GO:0050678	TM1	BP	GO:0050678	regulation of epithelial cell proliferation	50/729	351/15707	1.24e-12	3.17e-10	2.3e-10	20692/20317/20315/21825/20319/64103/56213/17242/20377/21828/13601/18654/11819/14451/14172/56312/13386/21808/235505/22160/21803/18103/13649/12828/15901/14645/13052/22340/15312/15370/94275/217166/15205/13057/67866/68585/18028/14734/12192/22418/14183/16476/22695/74155/14184/11835/11983/15368/14775/20296	50	50	Active	0.336315	1.31816	0.13014	0.648398	0.620085	85	tags=20%, list=11%, signal=19%	Sfrp2/Sparc/Tnmd/Thbs1/Serpinf1/Thbs4/Htra1/Sfrp1/Nupr1/Gas1
TM1_BP_GO:0007178	TM1	BP	GO:0007178	transmembrane receptor protein serine/threonine kinase signaling pathway	46/729	319/15707	6.56e-12	1.6e-09	1.16e-09	12843/21825/16007/20319/56213/14313/21809/20377/12845/14362/16998/20289/73230/67888/21808/235505/66695/246154/21419/14281/17263/21803/15211/19663/18133/68010/15901/65112/13653/14042/16948/21813/432442/50766/16419/20340/15205/218952/14734/22418/16476/14828/22057/20024/20296/328365	46	46	Active	0.394196	1.51873	0.0392805	0.501726	0.479818	214	tags=48%, list=28%, signal=37%	Sfrp2/Col1a2/Thbs1/Ccn1/Comp/Htra1/Sfrp1/Tgfb3/Fzd1/Fst/Aspn/Ltbp3/Meg3/Tgfb2/Vasn/Tgfb1/Ccn3/Scx/Bmper/Id1/Cd109/Hexa
TM1_BP_GO:0001667	TM1	BP	GO:0001667	ameboidal-type cell migration	53/729	411/15707	1.32e-11	3.07e-09	2.23e-09	14268/13179/20692/20317/20315/21825/13616/114886/12215/12558/68792/18187/13036/11819/17311/14172/56332/73230/11826/21808/24136/22160/21803/15289/67916/13078/21857/18133/18186/107351/20971/14645/20620/12317/11475/15200/16952/21813/15370/11848/68585/13731/22418/16476/15251/12631/71371/13641/16412/11852/15368/14775/68328	53	53	Active	0.243781	0.964926	0.518917	0.871452	0.8334	166	tags=32%, list=22%, signal=27%	Sparc/Fn1/Thbs1/Serpinf1/Dcn/Ctsh/Srpx2/Bsg/Aqp1/Cdh2/Amotl2/Tgfb2/Fgf18/Tgfb1/Timp1/Ccn3/Twist1
TM1_BP_GO:0045766	TM1	BP	GO:0045766	positive regulation of angiogenesis	30/729	157/15707	3.03e-11	6.41e-09	4.65e-09	21825/20319/12654/17242/54409/13601/18654/13036/14172/73230/11826/19223/12394/15289/13078/18186/16854/20312/15234/22340/21813/68585/58861/22418/15251/20193/12226/16412/11852/15368	30	30	Active	0.294143	1.03167	0.427422	0.832529	0.796175	17	tags=10%, list=2%, signal=10%	Sfrp2/Chil1/Thbs1
TM1_BP_GO:1904018	TM1	BP	GO:1904018	positive regulation of vasculature development	30/729	157/15707	3.03e-11	6.41e-09	4.65e-09	21825/20319/12654/17242/54409/13601/18654/13036/14172/73230/11826/19223/12394/15289/13078/18186/16854/20312/15234/22340/21813/68585/58861/22418/15251/20193/12226/16412/11852/15368	30	30	Active	0.294143	1.03167	0.427422	0.832529	0.796175	17	tags=10%, list=2%, signal=10%	Sfrp2/Chil1/Thbs1
TM1_BP_GO:0002062	TM1	BP	GO:0002062	chondrocyte differentiation	23/729	101/15707	1.6e-10	2.99e-08	2.17e-08	20319/17242/12845/13601/16998/14172/216616/20289/15530/12406/12394/73121/21803/18133/218772/66175/14219/14042/21813/20340/18028/22402/214855	23	23	Active	0.316919	1.04366	0.416176	0.831325	0.795024	178	tags=43%, list=23%, signal=34%	Sfrp2/Comp/Ltbp3/Serpinh1/Hspg2/Fgf18/Tgfb1/Ccn3/Runx1/Scx
TM1_BP_GO:0008015	TM1	BP	GO:0008015	blood circulation	52/729	430/15707	2.26e-10	3.93e-08	2.85e-08	12843/14456/18708/13616/11931/12845/54409/17390/11539/11421/242202/50706/11819/52589/18162/21808/11820/74617/12291/12293/21803/13649/17300/60596/13400/192176/98660/20312/13052/14219/11475/11928/22340/15200/14042/227753/20657/14681/14683/11848/13057/218952/13731/58861/74840/15251/56188/20193/17319/11835/15368/14775	52	52	Active	0.20034	0.791009	0.767996	0.955065	0.913361	67	tags=13%, list=9%, signal=13%	Col1a2/Gas6/Comp/Postn/Pik3r1/Atp1b1/Mmp2
TM1_BP_GO:0060348	TM1	BP	GO:0060348	bone development	34/729	212/15707	2.2e-10	3.93e-08	2.85e-08	20692/21825/12842/12111/20319/17926/12643/232174/12845/16998/14172/27973/20289/19035/11647/15530/12406/22160/18590/73121/17300/218772/102866/14042/16948/14683/21813/11848/20340/22402/14183/29813/14184/20148	34	34	Active	0.567281	2.04813	0.000830795	0.151709	0.145084	46	tags=26%, list=6%, signal=26%	Sfrp2/Col1a1/Sparc/Thbs1/Chad/Myoc/Comp/Bgn/Cyp26b1
TM1_BP_GO:0003013	TM1	BP	GO:0003013	circulatory system process	54/729	457/15707	2.39e-10	4.02e-08	2.92e-08	12843/14456/64817/18708/13616/11931/12845/54409/17390/11539/11421/242202/50706/11819/52589/18162/21808/11820/74617/12291/12293/21803/18671/13649/17300/60596/13400/192176/98660/20312/13052/14219/11475/11928/22340/15200/14042/227753/20657/14681/14683/11848/13057/218952/13731/58861/74840/15251/56188/20193/17319/11835/15368/14775	54	54	Active	0.222441	0.884389	0.636352	0.915885	0.875892	67	tags=15%, list=9%, signal=15%	Col1a2/Gas6/Comp/Svep1/Postn/Pik3r1/Atp1b1/Mmp2
TM1_BP_GO:0030323	TM1	BP	GO:0030323	respiratory tube development	33/729	206/15707	4.19e-10	6.8e-08	4.93e-08	20692/12654/21809/17313/11421/13036/16998/19662/14172/52377/16011/17263/18590/21923/21803/319939/15289/18595/15901/14726/14219/216725/14042/16948/21813/15205/18028/14734/18552/22418/14183/74155/14184	33	33	Active	0.335678	1.20421	0.239944	0.752415	0.71956	155	tags=36%, list=20%, signal=30%	Sparc/Chil1/Tgfb3/Ctsh/Rcn3/Mgp/Ltbp3/Tnc/Meg3/Ace/Fgf18/Tgfb1
TM1_BP_GO:0048705	TM1	BP	GO:0048705	skeletal system morphogenesis	33/729	207/15707	4.76e-10	7.49e-08	5.43e-08	21825/12842/20319/12643/232174/21809/20377/12845/17390/14451/16998/18933/14172/20289/21808/11647/15530/12406/22160/20204/73121/17300/18595/218772/14219/14042/14683/21813/20340/14183/71371/14184/20148	33	33	Active	0.532719	1.91108	0.00153097	0.151709	0.145084	148	tags=48%, list=19%, signal=41%	Sfrp2/Col1a1/Thbs1/Chad/Comp/Cyp26b1/Mmp2/Sfrp1/Tgfb3/Gas1/Ltbp3/Serpinh1/Hspg2/Prrx1/Tgfb2/Fgf18
TM1_BP_GO:0060349	TM1	BP	GO:0060349	bone morphogenesis	21/729	90/15707	6.18e-10	9.13e-08	6.63e-08	21825/12842/20319/232174/12845/16998/14172/20289/11647/15530/12406/22160/17300/218772/14042/14683/21813/20340/14183/14184/20148	21	21	Active	0.550398	1.772	0.0102602	0.287872	0.275302	178	tags=52%, list=23%, signal=41%	Sfrp2/Col1a1/Thbs1/Comp/Cyp26b1/Ltbp3/Serpinh1/Hspg2/Fgf18/Twist1/Scx
TM1_BP_GO:0030324	TM1	BP	GO:0030324	lung development	32/729	203/15707	1.17e-09	1.68e-07	1.22e-07	20692/12654/21809/17313/11421/13036/16998/19662/14172/52377/16011/17263/18590/21923/21803/319939/15289/18595/15901/14726/14219/216725/14042/16948/21813/15205/18028/14734/22418/14183/74155/14184	32	32	Active	0.342998	1.22256	0.223432	0.742382	0.709965	155	tags=38%, list=20%, signal=31%	Sparc/Chil1/Tgfb3/Ctsh/Rcn3/Mgp/Ltbp3/Tnc/Meg3/Ace/Fgf18/Tgfb1
TM1_BP_GO:0032964	TM1	BP	GO:0032964	collagen biosynthetic process	16/729	54/15707	1.59e-09	2.15e-07	1.56e-07	14268/12842/21809/114886/14789/52377/20289/12406/26427/21803/12831/14219/22417/74155/54683/20296	16	16	Active	0.405835	1.21676	0.241427	0.752762	0.719892	178	tags=50%, list=23%, signal=39%	Col1a1/Fn1/Tgfb3/Rcn3/P3h3/Serpinh1/Tgfb1/Scx
TM1_BP_GO:0085029	TM1	BP	GO:0085029	extracellular matrix assembly	14/729	41/15707	2.09e-09	2.68e-07	1.94e-07	12843/23876/54409/14758/76293/16998/57764/21803/16779/14230/16777/207596/16948/81877	14	14	Active	0.473443	1.36806	0.13086	0.648398	0.620085	155	tags=50%, list=20%, signal=41%	Col1a2/Fbln5/Mfap4/Ltbp3/Gpm6b/Ntn4/Tgfb1
TM1_BP_GO:0110148	TM1	BP	GO:0110148	biomineralization	26/729	144/15707	2.26e-09	2.82e-07	2.05e-07	12843/12842/16007/14456/12845/27047/17313/13601/100038882/14758/22420/16998/12608/13386/66695/22160/73121/21803/70370/16948/14734/22417/14183/15251/20750/14184	26	26	Active	0.424168	1.43989	0.0844118	0.588214	0.562529	166	tags=50%, list=22%, signal=41%	Col1a1/Col1a2/Ccn1/Gas6/Comp/Omd/Mgp/Aspn/Ltbp3/Gpm6b/Dlk1/Tgfb1/Twist1
TM1_BP_GO:0010466	TM1	BP	GO:0010466	negative regulation of peptidase activity	29/729	176/15707	2.48e-09	3.02e-07	2.19e-07	20317/21825/20319/14456/13010/21858/13601/12258/232345/11826/21859/235505/12406/11820/20716/13479/68581/209378/21857/14433/64209/15234/15370/67866/14734/13014/53614/57320/14775	29	29	Active	0.476464	1.661	0.018788	0.369068	0.352952	217	tags=62%, list=28%, signal=46%	Sfrp2/Thbs1/Serpinf1/Cst3/Gas6/A2m/Timp2/Aqp1/Serping1/Serpinh1/Timp1/App/Tmed10/Dpep1/Serpina3n/Herpud1/Cd109/Timp3
TM1_BP_GO:0010631	TM1	BP	GO:0010631	epithelial cell migration	38/729	287/15707	5.35e-09	6.06e-07	4.4e-07	13179/20692/20317/21825/12215/68792/13036/11819/14172/73230/11826/21808/24136/21803/15289/67916/13078/18133/18186/107351/14645/20620/12317/15200/16952/21813/15370/11848/68585/13731/22418/16476/15251/16412/11852/15368/14775/68328	38	38	Active	0.365111	1.34939	0.124694	0.647182	0.618922	252	tags=53%, list=33%, signal=37%	Sparc/Thbs1/Serpinf1/Dcn/Ctsh/Srpx2/Bsg/Aqp1/Tgfb2/Fgf18/Tgfb1/Ccn3/Hbegf/Bmper/Plk2/Plpp3/Glul/Anxa1/Calr/Kank1
TM1_BP_GO:0048608	TM1	BP	GO:0048608	reproductive structure development	46/729	389/15707	5.22e-09	6.06e-07	4.4e-07	20317/16007/20319/56213/14313/20377/16477/15081/17390/11819/12608/19662/17311/56312/53381/21808/22187/14238/12702/19223/16157/12394/21923/18671/13649/11504/17300/18595/192176/14367/16952/18783/15205/12577/12192/19156/22417/22418/14183/72780/56334/15251/71371/11835/22329/68328	46	46	Active	0.261513	1.00754	0.454702	0.846775	0.8098	82	tags=17%, list=11%, signal=17%	Sfrp2/Serpinf1/Ccn1/Htra1/Mmp2/Sfrp1/Nupr1/Fst
TM1_BP_GO:0090132	TM1	BP	GO:0090132	epithelium migration	38/729	289/15707	6.49e-09	7.03e-07	5.1e-07	13179/20692/20317/21825/12215/68792/13036/11819/14172/73230/11826/21808/24136/21803/15289/67916/13078/18133/18186/107351/14645/20620/12317/15200/16952/21813/15370/11848/68585/13731/22418/16476/15251/16412/11852/15368/14775/68328	38	38	Active	0.365111	1.34939	0.124694	0.647182	0.618922	252	tags=53%, list=33%, signal=37%	Sparc/Thbs1/Serpinf1/Dcn/Ctsh/Srpx2/Bsg/Aqp1/Tgfb2/Fgf18/Tgfb1/Ccn3/Hbegf/Bmper/Plk2/Plpp3/Glul/Anxa1/Calr/Kank1
TM1_BP_GO:0061458	TM1	BP	GO:0061458	reproductive system development	46/729	392/15707	6.66e-09	7.06e-07	5.12e-07	20317/16007/20319/56213/14313/20377/16477/15081/17390/11819/12608/19662/17311/56312/53381/21808/22187/14238/12702/19223/16157/12394/21923/18671/13649/11504/17300/18595/192176/14367/16952/18783/15205/12577/12192/19156/22417/22418/14183/72780/56334/15251/71371/11835/22329/68328	46	46	Active	0.261513	1.00754	0.454702	0.846775	0.8098	82	tags=17%, list=11%, signal=17%	Sfrp2/Serpinf1/Ccn1/Htra1/Mmp2/Sfrp1/Nupr1/Fst
TM1_BP_GO:0090130	TM1	BP	GO:0090130	tissue migration	38/729	290/15707	7.15e-09	7.41e-07	5.38e-07	13179/20692/20317/21825/12215/68792/13036/11819/14172/73230/11826/21808/24136/21803/15289/67916/13078/18133/18186/107351/14645/20620/12317/15200/16952/21813/15370/11848/68585/13731/22418/16476/15251/16412/11852/15368/14775/68328	38	38	Active	0.365111	1.34939	0.124694	0.647182	0.618922	252	tags=53%, list=33%, signal=37%	Sparc/Thbs1/Serpinf1/Dcn/Ctsh/Srpx2/Bsg/Aqp1/Tgfb2/Fgf18/Tgfb1/Ccn3/Hbegf/Bmper/Plk2/Plpp3/Glul/Anxa1/Calr/Kank1
TM1_BP_GO:0060541	TM1	BP	GO:0060541	respiratory system development	33/729	230/15707	7.42e-09	7.53e-07	5.46e-07	20692/12654/21809/17313/11421/13036/16998/19662/14172/52377/16011/17263/18590/21923/21803/319939/15289/18595/15901/14726/14219/216725/14042/16948/116701/21813/15205/18028/14734/22418/14183/74155/14184	33	33	Active	0.336701	1.20789	0.237161	0.747686	0.715038	155	tags=36%, list=20%, signal=30%	Sparc/Chil1/Tgfb3/Ctsh/Rcn3/Mgp/Ltbp3/Tnc/Meg3/Ace/Fgf18/Tgfb1
TM1_BP_GO:0052547	TM1	BP	GO:0052547	regulation of peptidase activity	42/729	343/15707	8.84e-09	8.61e-07	6.25e-07	20317/21825/16007/20319/14456/13010/21858/13601/13036/12258/52377/232345/11826/21859/235505/12406/11820/20716/13479/68581/12828/209378/21857/215114/14433/64209/15234/14219/227753/16913/15370/11848/19186/67866/14734/13014/19188/53614/13033/57320/19167/14775	42	42	Active	0.421628	1.59208	0.0256824	0.41848	0.400207	217	tags=52%, list=28%, signal=40%	Sfrp2/Thbs1/Serpinf1/Cst3/Ccn1/Gas6/A2m/Timp2/Ctsh/Rcn3/Aqp1/Serping1/Serpinh1/Timp1/App/Col4a3/Tmed10/Dpep1/Serpina3n/Herpud1/Cd109/Timp3
TM1_BP_GO:0071774	TM1	BP	GO:0071774	response to fibroblast growth factor	19/729	85/15707	8.71e-09	8.61e-07	6.25e-07	21825/20377/14172/26427/14733/399558/14219/14042/116701/15370/219134/12192/22417/22418/14183/22695/14184/15936/68169	19	19	Active	0.228637	0.716692	0.811054	0.964786	0.922658	70	tags=11%, list=9%, signal=10%	Thbs1/Sfrp1
TM1_BP_GO:0031214	TM1	BP	GO:0031214	biomineral tissue development	25/729	143/15707	9.1e-09	8.69e-07	6.31e-07	12843/12842/16007/14456/12845/27047/17313/13601/100038882/14758/22420/16998/12608/13386/66695/22160/73121/21803/16948/14734/22417/14183/15251/20750/14184	25	25	Active	0.436616	1.46888	0.0735699	0.565404	0.540715	166	tags=52%, list=22%, signal=42%	Col1a1/Col1a2/Ccn1/Gas6/Comp/Omd/Mgp/Aspn/Ltbp3/Gpm6b/Dlk1/Tgfb1/Twist1
TM1_BP_GO:0048762	TM1	BP	GO:0048762	mesenchymal cell differentiation	32/729	221/15707	1e-08	9.37e-07	6.8e-07	14268/12842/20319/17242/13616/21809/20377/12558/18187/17311/67888/21808/24136/246154/22160/21803/17300/18186/68010/14726/192176/14042/21813/15205/68585/218952/22417/22418/14183/15251/12631/13641	32	32	Active	0.270254	0.963274	0.515989	0.871452	0.8334	15	tags=9%, list=2%, signal=10%	Sfrp2/Col1a1/Fn1
TM1_BP_GO:0090287	TM1	BP	GO:0090287	regulation of cellular response to growth factor stimulus	36/729	270/15707	1.13e-08	1.04e-06	7.51e-07	13179/21825/16007/20319/64103/56213/14313/21809/20377/14362/14172/73230/235505/66695/246154/21419/26427/226101/14733/21803/68010/65112/407831/22340/16948/116701/219134/50766/20340/15205/14734/22417/22418/15251/14828/22057	36	36	Active	0.481239	1.7589	0.00752909	0.259733	0.248392	101	tags=31%, list=13%, signal=28%	Sfrp2/Tnmd/Thbs1/Dcn/Ccn1/Htra1/Sfrp1/Tgfb3/Fzd1/Fst/Aspn
TM1_BP_GO:0110149	TM1	BP	GO:0110149	regulation of biomineralization	19/729	88/15707	1.6e-08	1.42e-06	1.03e-06	16007/14456/12845/27047/17313/13601/100038882/14758/22420/16998/12608/66695/22160/73121/21803/70370/22417/15251/14184	19	19	Active	0.38831	1.21721	0.240312	0.752622	0.719758	166	tags=53%, list=22%, signal=42%	Ccn1/Gas6/Comp/Omd/Mgp/Aspn/Ltbp3/Gpm6b/Tgfb1/Twist1
TM1_BP_GO:0001649	TM1	BP	GO:0001649	osteoblast differentiation	29/729	191/15707	1.68e-08	1.46e-06	1.06e-06	12842/16007/20319/17926/20377/16477/15081/14362/12608/12609/13386/16011/22160/26427/15078/68010/15901/114584/16948/68588/14683/225998/50766/218952/67399/22402/22417/22057/20750	29	29	Active	0.367732	1.28195	0.176296	0.693351	0.663075	81	tags=21%, list=11%, signal=19%	Sfrp2/Col1a1/Myoc/Ccn1/Sfrp1/Fzd1
TM1_BP_GO:0034446	TM1	BP	GO:0034446	substrate adhesion-dependent cell spreading	21/729	108/15707	2.03e-08	1.71e-06	1.24e-06	14268/17926/17242/20377/14114/50706/23928/57764/13640/20194/18186/107351/18003/16779/14726/192176/12317/18453/16777/11848/218952	21	21	Active	0.360833	1.1617	0.287584	0.771593	0.737901	84	tags=24%, list=11%, signal=22%	Fn1/Myoc/Postn/Sfrp1/Fbln1
TM1_BP_GO:0070482	TM1	BP	GO:0070482	response to oxygen levels	31/729	216/15707	2.1e-08	1.71e-06	1.24e-06	67749/11931/21809/68655/17390/11539/18654/11670/11826/21808/22027/16526/246154/22160/19223/56458/14726/12946/13653/18453/22340/20657/20677/68585/12192/18791/15251/19309/52538/15368/68169	31	31	Active	0.363575	1.28466	0.16957	0.685013	0.655101	192	tags=45%, list=25%, signal=35%	Mgarp/Fndc1/Atp1b1/Mmp2/Tgfb3/Aldh3a1/Aqp1/Adora1/Tgfb2/Vasn/Hsp90b1/Twist1/Ptgis/Kcnk2
TM1_BP_GO:0061035	TM1	BP	GO:0061035	regulation of cartilage development	16/729	64/15707	2.39e-08	1.87e-06	1.36e-06	16007/17242/13038/16998/14172/216616/20289/21808/73121/21803/218772/66175/14219/20340/22402/22418	16	16	Active	0.277645	0.832422	0.67277	0.925266	0.884864	178	tags=44%, list=23%, signal=34%	Ccn1/Ctsk/Ltbp3/Tgfb2/Fgf18/Tgfb1/Scx
TM1_BP_GO:0016055	TM1	BP	GO:0016055	Wnt signaling pathway	45/729	396/15707	2.6e-08	2.01e-06	1.46e-06	12842/20319/17926/17242/20377/242939/14362/24117/12558/14735/22420/56332/24136/72293/11820/68151/21803/13649/67916/29811/107351/56458/68010/21885/69217/14367/13653/14042/68588/56811/219134/20677/218952/21888/14734/22402/22417/22418/14183/72780/53614/15248/319478/14184/14797	45	45	Active	0.280392	1.07435	0.370676	0.801548	0.766548	174	tags=31%, list=23%, signal=26%	Sfrp2/Col1a1/Myoc/Sfrp1/Fzd1/Cpz/Cdh2/Wif1/Gpc4/Amotl2/Tgfb1/App/Nkd2/Wls
TM1_BP_GO:0060485	TM1	BP	GO:0060485	mesenchyme development	35/729	267/15707	2.79e-08	2.11e-06	1.53e-06	14268/21825/12842/20319/17242/13616/21809/20377/12558/18187/17311/20289/67888/21808/24136/246154/22160/21803/17300/18186/68010/14726/192176/14042/21813/15205/68585/218952/12192/22417/22418/14183/15251/12631/13641	35	35	Active	0.311112	1.12976	0.30977	0.780879	0.746781	17	tags=11%, list=2%, signal=12%	Sfrp2/Col1a1/Fn1/Thbs1
TM1_BP_GO:0198738	TM1	BP	GO:0198738	cell-cell signaling by wnt	45/729	397/15707	2.81e-08	2.11e-06	1.53e-06	12842/20319/17926/17242/20377/242939/14362/24117/12558/14735/22420/56332/24136/72293/11820/68151/21803/13649/67916/29811/107351/56458/68010/21885/69217/14367/13653/14042/68588/56811/219134/20677/218952/21888/14734/22402/22417/22418/14183/72780/53614/15248/319478/14184/14797	45	45	Active	0.280392	1.07435	0.370676	0.801548	0.766548	174	tags=31%, list=23%, signal=26%	Sfrp2/Col1a1/Myoc/Sfrp1/Fzd1/Cpz/Cdh2/Wif1/Gpc4/Amotl2/Tgfb1/App/Nkd2/Wls
TM1_BP_GO:0001666	TM1	BP	GO:0001666	response to hypoxia	29/729	196/15707	3.02e-08	2.23e-06	1.62e-06	67749/11931/21809/68655/17390/11539/18654/11670/11826/21808/22027/16526/246154/22160/19223/12946/13653/18453/22340/20657/20677/68585/12192/18791/15251/19309/52538/15368/68169	29	29	Active	0.387153	1.34965	0.129679	0.648398	0.620085	192	tags=48%, list=25%, signal=38%	Mgarp/Fndc1/Atp1b1/Mmp2/Tgfb3/Aldh3a1/Aqp1/Adora1/Tgfb2/Vasn/Hsp90b1/Twist1/Ptgis/Kcnk2
TM1_BP_GO:0044344	TM1	BP	GO:0044344	cellular response to fibroblast growth factor stimulus	18/729	83/15707	3.54e-08	2.58e-06	1.87e-06	21825/20377/14172/26427/14733/399558/14219/14042/116701/15370/219134/12192/22417/22418/14183/22695/14184/68169	18	18	Active	0.236961	0.733431	0.787451	0.962102	0.920091	70	tags=11%, list=9%, signal=10%	Thbs1/Sfrp1
TM1_BP_GO:0048659	TM1	BP	GO:0048659	smooth muscle cell proliferation	26/729	166/15707	4.83e-08	3.36e-06	2.44e-06	21825/11815/18708/21809/17390/21817/18162/16011/54598/13649/11504/29811/18133/20312/13653/15200/21813/19737/11848/13057/22402/14183/16476/15251/12846/15368	26	26	Active	0.313064	1.06273	0.395312	0.819862	0.784062	74	tags=19%, list=10%, signal=18%	Thbs1/Apod/Pik3r1/Mmp2/Tgfb3
TM1_BP_GO:0010712	TM1	BP	GO:0010712	regulation of collagen metabolic process	14/729	51/15707	4.97e-08	3.41e-06	2.47e-06	14268/21809/114886/76293/20289/26427/21803/14219/22417/74155/16412/14184/54683/20296	14	14	Active	0.252931	0.730871	0.788477	0.962681	0.920645	100	tags=21%, list=13%, signal=19%	Fn1/Tgfb3/Mfap4
TM1_BP_GO:0033002	TM1	BP	GO:0033002	muscle cell proliferation	31/729	225/15707	5.51e-08	3.73e-06	2.71e-06	21825/11815/18708/21809/17390/19662/21817/18162/16011/21808/16526/54598/13649/11504/17300/29811/18133/20312/13052/13653/15200/21813/19737/11848/13057/22402/14183/16476/15251/12846/15368	31	31	Active	0.244085	0.86245	0.653695	0.921463	0.881226	74	tags=16%, list=10%, signal=15%	Thbs1/Apod/Pik3r1/Mmp2/Tgfb3
TM1_BP_GO:0036293	TM1	BP	GO:0036293	response to decreased oxygen levels	29/729	202/15707	5.96e-08	3.98e-06	2.88e-06	67749/11931/21809/68655/17390/11539/18654/11670/11826/21808/22027/16526/246154/22160/19223/12946/13653/18453/22340/20657/20677/68585/12192/18791/15251/19309/52538/15368/68169	29	29	Active	0.387153	1.34965	0.129679	0.648398	0.620085	192	tags=48%, list=25%, signal=38%	Mgarp/Fndc1/Atp1b1/Mmp2/Tgfb3/Aldh3a1/Aqp1/Adora1/Tgfb2/Vasn/Hsp90b1/Twist1/Ptgis/Kcnk2
TM1_BP_GO:0070167	TM1	BP	GO:0070167	regulation of biomineral tissue development	18/729	87/15707	7.66e-08	5.05e-06	3.66e-06	16007/14456/12845/27047/17313/13601/100038882/14758/22420/16998/12608/66695/22160/73121/21803/22417/15251/14184	18	18	Active	0.405802	1.25602	0.20632	0.720159	0.688713	166	tags=56%, list=22%, signal=45%	Ccn1/Gas6/Comp/Omd/Mgp/Aspn/Ltbp3/Gpm6b/Tgfb1/Twist1
TM1_BP_GO:0030509	TM1	BP	GO:0030509	BMP signaling pathway	23/729	138/15707	8.91e-08	5.79e-06	4.2e-06	16007/20319/56213/14313/21809/20377/12845/14362/20289/73230/67888/21808/21419/21803/68010/15901/13653/14042/50766/15205/14734/22418/22057	23	23	Active	0.478222	1.57486	0.0401471	0.505389	0.483321	82	tags=35%, list=11%, signal=32%	Sfrp2/Ccn1/Comp/Htra1/Sfrp1/Tgfb3/Fzd1/Fst
TM1_BP_GO:0045861	TM1	BP	GO:0045861	negative regulation of proteolysis	34/729	267/15707	9.03e-08	5.79e-06	4.2e-06	20317/21825/20319/14456/13010/21858/18708/13601/12258/14451/232345/11826/21859/235505/12406/11820/20716/13479/68581/209378/21857/14433/64209/56374/15234/15370/20340/67866/14734/18791/13014/53614/57320/14775	34	34	Active	0.470276	1.6979	0.0117696	0.310288	0.296739	217	tags=59%, list=28%, signal=44%	Sfrp2/Thbs1/Serpinf1/Cst3/Gas6/Pik3r1/A2m/Timp2/Gas1/Aqp1/Serping1/Serpinh1/Timp1/App/Tmed10/Dpep1/Serpina3n/Herpud1/Cd109/Timp3
TM1_BP_GO:0043542	TM1	BP	GO:0043542	endothelial cell migration	29/729	206/15707	9.2e-08	5.83e-06	4.23e-06	13179/20692/20317/21825/12215/68792/11819/14172/73230/21803/15289/67916/13078/18133/18186/14645/20620/12317/16952/15370/11848/13731/22418/15251/16412/11852/15368/14775/68328	29	29	Active	0.399067	1.39118	0.105947	0.61306	0.58629	20	tags=14%, list=3%, signal=14%	Sparc/Thbs1/Serpinf1/Dcn
TM1_BP_GO:0050680	TM1	BP	GO:0050680	negative regulation of epithelial cell proliferation	23/729	139/15707	1.02e-07	6.39e-06	4.63e-06	20692/20317/21825/20319/64103/20377/11819/14451/56312/13386/21808/235505/21803/12828/94275/67866/18028/14734/22418/14183/14184/11835/11983	23	23	Active	0.573014	1.88702	0.00323529	0.194305	0.185821	85	tags=35%, list=11%, signal=32%	Sfrp2/Sparc/Tnmd/Thbs1/Serpinf1/Sfrp1/Nupr1/Gas1
TM1_BP_GO:0048660	TM1	BP	GO:0048660	regulation of smooth muscle cell proliferation	25/729	161/15707	1.04e-07	6.41e-06	4.65e-06	21825/11815/18708/21809/17390/21817/18162/16011/54598/13649/11504/29811/20312/13653/15200/21813/19737/11848/13057/22402/14183/16476/15251/12846/15368	25	25	Active	0.325732	1.09584	0.354381	0.801548	0.766548	74	tags=20%, list=10%, signal=19%	Thbs1/Apod/Pik3r1/Mmp2/Tgfb3
TM1_BP_GO:0071772	TM1	BP	GO:0071772	response to BMP	23/729	146/15707	2.57e-07	1.51e-05	1.09e-05	16007/20319/56213/14313/21809/20377/12845/14362/20289/73230/67888/21808/21419/21803/68010/15901/13653/14042/50766/15205/14734/22418/22057	23	23	Active	0.478222	1.57486	0.0401471	0.505389	0.483321	82	tags=35%, list=11%, signal=32%	Sfrp2/Ccn1/Comp/Htra1/Sfrp1/Tgfb3/Fzd1/Fst
TM1_BP_GO:0071773	TM1	BP	GO:0071773	cellular response to BMP stimulus	23/729	146/15707	2.57e-07	1.51e-05	1.09e-05	16007/20319/56213/14313/21809/20377/12845/14362/20289/73230/67888/21808/21419/21803/68010/15901/13653/14042/50766/15205/14734/22418/22057	23	23	Active	0.478222	1.57486	0.0401471	0.505389	0.483321	82	tags=35%, list=11%, signal=32%	Sfrp2/Ccn1/Comp/Htra1/Sfrp1/Tgfb3/Fzd1/Fst
TM1_BP_GO:1900024	TM1	BP	GO:1900024	regulation of substrate adhesion-dependent cell spreading	14/729	58/15707	2.88e-07	1.65e-05	1.2e-05	17926/17242/14114/50706/13640/20194/18186/107351/18003/14726/192176/12317/18453/218952	14	14	Active	0.324295	0.937086	0.549013	0.882138	0.843618	291	tags=71%, list=38%, signal=45%	Myoc/Postn/Fbln1/S100a10/Calr/Kank1/Efna5/P4hb/Pdpn/Nedd9
TM1_BP_GO:0030111	TM1	BP	GO:0030111	regulation of Wnt signaling pathway	35/729	294/15707	3.09e-07	1.75e-05	1.27e-05	12842/20319/17242/20377/14362/24117/12558/24136/72293/11820/68151/21803/13649/67916/107351/56458/68010/21885/69217/13653/68588/56811/219134/20677/21888/14734/22402/22418/14183/72780/53614/15248/319478/14184/14797	35	35	Active	0.262508	0.953261	0.529144	0.873588	0.835442	174	tags=29%, list=23%, signal=23%	Sfrp2/Col1a1/Sfrp1/Fzd1/Cdh2/Wif1/Tgfb1/App/Nkd2/Wls
TM1_BP_GO:0003151	TM1	BP	GO:0003151	outflow tract morphogenesis	16/729	77/15707	3.8e-07	2.1e-05	1.53e-05	21825/20319/14362/18187/21808/22160/17300/18186/218772/21813/15205/22418/14183/16476/15251/20148	16	16	Active	0.395996	1.18726	0.268115	0.768774	0.735205	17	tags=12%, list=2%, signal=12%	Sfrp2/Thbs1
TM1_BP_GO:0006979	TM1	BP	GO:0006979	response to oxidative stress	41/729	378/15707	3.87e-07	2.12e-05	1.54e-05	21825/11815/13010/23876/17392/114886/14362/17390/12350/53381/11826/11820/109815/625249/14281/13649/13078/18595/19663/14778/56458/18477/15234/18453/11668/20657/16952/22166/15505/226646/19156/16476/56615/15251/12631/14870/11852/57320/54683/15368/14775	41	41	Active	0.395012	1.48418	0.0546213	0.533246	0.509962	112	tags=27%, list=15%, signal=24%	Mmp3/Thbs1/Cst3/Apod/Car3/Fbln5/Mmp2/Fzd1/Gpx3/Aqp1/Prdx4
TM1_BP_GO:0000302	TM1	BP	GO:0000302	response to reactive oxygen species	26/729	184/15707	3.94e-07	2.13e-05	1.55e-05	21825/11815/23876/17390/11826/14281/13649/13078/18595/56458/18477/15234/20657/16952/22166/15505/19156/16476/15251/12631/14870/11852/57320/54683/15368/14775	26	26	Active	0.317053	1.07627	0.380069	0.805082	0.769927	67	tags=15%, list=9%, signal=15%	Thbs1/Apod/Fbln5/Mmp2
TM1_BP_GO:0003007	TM1	BP	GO:0003007	heart morphogenesis	31/729	247/15707	4.61e-07	2.44e-05	1.77e-05	21825/16007/20319/14362/18187/20564/19662/67888/21808/22160/21803/11504/17300/18186/218772/192176/12831/399558/14042/116701/21813/15205/20677/68585/22418/14183/16476/56334/15251/20148/328365	31	31	Active	0.28097	0.992778	0.476257	0.862014	0.824374	24	tags=10%, list=3%, signal=10%	Sfrp2/Thbs1/Ccn1
TM1_BP_GO:0010632	TM1	BP	GO:0010632	regulation of epithelial cell migration	29/729	223/15707	5.12e-07	2.65e-05	1.92e-05	13179/20692/20317/21825/12215/68792/13036/11819/14172/73230/11826/21808/21803/67916/18186/14645/20620/12317/15200/16952/21813/11848/68585/13731/22418/16476/15251/11852/15368	29	29	Active	0.470002	1.63847	0.0223195	0.395067	0.377816	241	tags=62%, list=32%, signal=44%	Sparc/Thbs1/Serpinf1/Dcn/Ctsh/Srpx2/Bsg/Aqp1/Tgfb2/Fgf18/Tgfb1/Hbegf/Bmper/Plk2/Plpp3/Glul/Anxa1/Calr
TM1_BP_GO:0060070	TM1	BP	GO:0060070	canonical Wnt signaling pathway	33/729	275/15707	5.59e-07	2.87e-05	2.08e-05	12842/20319/17242/20377/14362/12558/22420/72293/11820/68151/21803/13649/67916/107351/56458/68010/21885/69217/14367/13653/14042/68588/56811/20677/21888/14734/22417/22418/14183/72780/53614/14184/14797	33	33	Active	0.244595	0.877461	0.633125	0.915885	0.875892	174	tags=27%, list=23%, signal=22%	Sfrp2/Col1a1/Sfrp1/Fzd1/Cdh2/Tgfb1/App/Nkd2/Wls
TM1_BP_GO:0048732	TM1	BP	GO:0048732	gland development	41/729	385/15707	6.28e-07	3.16e-05	2.29e-05	20317/17242/21809/20377/17390/12608/21817/14172/16011/57764/68151/17263/12394/18590/21923/21803/13649/17300/18595/18186/15234/16952/21813/18208/15205/12577/68585/78908/18028/19156/22417/22418/14183/16476/77889/15251/71371/11835/11821/15368/14775	41	41	Active	0.172159	0.646852	0.907709	0.983125	0.940196	177	tags=29%, list=23%, signal=24%	Serpinf1/Mmp2/Sfrp1/Tgfb3/Tnc/Meg3/Fgf18/Ntn4/Tgfb1/Cdkn1c/Wls/Runx1
TM1_BP_GO:0044342	TM1	BP	GO:0044342	type B pancreatic cell proliferation	9/729	24/15707	6.63e-07	3.3e-05	2.39e-05	20377/56312/16011/11534/18133/16010/15370/217166/74155	9	9	Active	0.265885	0.677058	0.831662	0.969307	0.926981	195	tags=44%, list=26%, signal=33%	Sfrp1/Nupr1/Ccn3/Adk
[truncated: 1,883 more rows]
