# Supplementary material for: Single-cell profiling of trabecular meshwork identifies mitochondrial dysfunction in a glaucoma model that is protected by vitamin B3 treatment
Source: eLife. 2026 Jan 20;14:RP107161. doi: 10.7554/eLife.107161 (PMC12818872; doi:10.7554/eLife.107161)
Supplement: Supplementary file 4. [file elife-107161-supp4.xlsx]

## Sheet: File 4
ligand	TM1_expression	TM2_expression	TM3_expression	target	weight	target_cell
Adam17	0.290524	0.29202	0.214275	Slc2a1	0.0026252	BECs
Adam17	0.290524	0.29202	0.214275	Pdgfb	0.00260104	BECs
Adam17	0.290524	0.29202	0.214275	Cd34	0.00257822	CCs
Adam17	0.290524	0.29202	0.214275	Edn1	0.00273982	CCs
Adam17	0.290524	0.29202	0.214275	Il6	0.00410247	CCs
Adam17	0.290524	0.29202	0.214275	Cd38	0.00246667	BECs
Adam17	0.290524	0.29202	0.214275	Vegfa	0.00250314	TM2
Adam17	0.290524	0.29202	0.214275	Kdr	0.00239838	CCs
Adam17	0.290524	0.29202	0.214275	Timp3	0.00473414	TM2
Adam17	0.290524	0.29202	0.214275	Cd34	0.00257822	BECs
Adam17	0.290524	0.29202	0.214275	Edn1	0.00273982	BECs
Adam17	0.290524	0.29202	0.214275	Sod1	0.00224807	BECs
Adam17	0.290524	0.29202	0.214275	Fas	0.00255338	BECs
Adam17	0.290524	0.29202	0.214275	Vcam1	0.00219424	CCs
Adam17	0.290524	0.29202	0.214275	Kdr	0.00239838	BECs
Adam17	0.290524	0.29202	0.214275	Hspa1a	0.00266441	BECs
Adam17	0.290524	0.29202	0.214275	Ccl19	0.00290574	TM2
Adam17	0.290524	0.29202	0.214275	Timp3	0.00473414	BECs
Adam17	0.290524	0.29202	0.214275	Fos	0.00250332	TM2
Adam17	0.290524	0.29202	0.214275	Pdgfb	0.00260104	CCs
Adam17	0.290524	0.29202	0.214275	Ccl2	0.00252053	TM2
Adam17	0.290524	0.29202	0.214275	Plat	0.00232859	TM2
Adam17	0.290524	0.29202	0.214275	Sele	0.00246766	CCs
Adam17	0.290524	0.29202	0.214275	Traf1	0.00252048	CCs
Adam9	0.161544	0.181368	0.13009	Ets1	0.00101416	CCs
Adam9	0.161544	0.181368	0.13009	Edn1	0.00105772	CCs
Adam9	0.161544	0.181368	0.13009	Ier5	0.000976526	CCs
Adam9	0.161544	0.181368	0.13009	Atf3	0.00101796	CCs
Adam9	0.161544	0.181368	0.13009	Ahnak	0.00103164	CCs
Adam9	0.161544	0.181368	0.13009	Mecom	0.000989274	CCs
Adam9	0.161544	0.181368	0.13009	Cav1	0.000952968	CCs
Adam9	0.161544	0.181368	0.13009	Zfp36	0.000987463	CCs
Adam9	0.161544	0.181368	0.13009	Bcr	0.000970754	CCs
Adam9	0.161544	0.181368	0.13009	Il6	0.00148556	CCs
Adam9	0.161544	0.181368	0.13009	Lmna	0.00103746	CCs
Agt	0.00245182	0.0341181	0.0828254	Col4a1	0.00455713	CCs
Agt	0.00245182	0.0341181	0.0828254	Selp	0.00543394	CCs
Agt	0.00245182	0.0341181	0.0828254	Edn1	0.0054851	BECs
Agt	0.00245182	0.0341181	0.0828254	Vcam1	0.00516514	TM1
Agt	0.00245182	0.0341181	0.0828254	Spp1	0.00511373	TM1
Agt	0.00245182	0.0341181	0.0828254	Pla2g4a	0.00483156	TM1
Agt	0.00245182	0.0341181	0.0828254	Col4a1	0.00455713	BECs
Agt	0.00245182	0.0341181	0.0828254	Col4a2	0.00455878	BECs
Agt	0.00245182	0.0341181	0.0828254	Mmp14	0.00453336	TM2
Agt	0.00245182	0.0341181	0.0828254	Sod3	0.00486269	TM1
Agt	0.00245182	0.0341181	0.0828254	Abcb1a	0.0053442	CCs
Agt	0.00245182	0.0341181	0.0828254	Pdgfb	0.00455874	CCs
Agt	0.00245182	0.0341181	0.0828254	Pdgfrb	0.00491964	TM2
Agt	0.00245182	0.0341181	0.0828254	Col4a2	0.00455878	SECs
Agt	0.00245182	0.0341181	0.0828254	Pdgfb	0.00455874	BECs
Agt	0.00245182	0.0341181	0.0828254	Ptgis	0.00493219	TM1
Agt	0.00245182	0.0341181	0.0828254	Serpine1	0.00533414	TM1
Agt	0.00245182	0.0341181	0.0828254	Tek	0.0053034	SECs
Agt	0.00245182	0.0341181	0.0828254	Ace	0.0044662	CCs
Agt	0.00245182	0.0341181	0.0828254	Podxl	0.00457233	BECs
Agt	0.00245182	0.0341181	0.0828254	Klf9	0.00438959	TM2
Agt	0.00245182	0.0341181	0.0828254	Ednra	0.00519604	TM2
Agt	0.00245182	0.0341181	0.0828254	Timp3	0.00451637	TM1
Agt	0.00245182	0.0341181	0.0828254	Podxl	0.00457233	CCs
Agt	0.00245182	0.0341181	0.0828254	Postn	0.00525247	TM1
Agt	0.00245182	0.0341181	0.0828254	Col4a2	0.00455878	TM1
Agt	0.00245182	0.0341181	0.0828254	Cacna1g	0.00453356	TM1
Agt	0.00245182	0.0341181	0.0828254	Tek	0.0053034	CCs
Agt	0.00245182	0.0341181	0.0828254	Timp3	0.00451637	TM2
Agt	0.00245182	0.0341181	0.0828254	Rgs3	0.00468758	BECs
Agt	0.00245182	0.0341181	0.0828254	Ace	0.0044662	BECs
Agt	0.00245182	0.0341181	0.0828254	Abcb1a	0.0053442	BECs
Agt	0.00245182	0.0341181	0.0828254	Nos3	0.00460088	CCs
Agt	0.00245182	0.0341181	0.0828254	Kdr	0.00454257	CCs
Agt	0.00245182	0.0341181	0.0828254	Kdr	0.00454257	BECs
Agt	0.00245182	0.0341181	0.0828254	Col4a1	0.00455713	SECs
Agt	0.00245182	0.0341181	0.0828254	Nos3	0.00460088	BECs
Agt	0.00245182	0.0341181	0.0828254	Pdgfrb	0.00491964	TM1
Agt	0.00245182	0.0341181	0.0828254	Col4a1	0.00455713	TM1
Agt	0.00245182	0.0341181	0.0828254	Col3a1	0.00496101	TM1
Agt	0.00245182	0.0341181	0.0828254	Spp1	0.00511373	TM2
Agt	0.00245182	0.0341181	0.0828254	Kdr	0.00454257	SECs
Agt	0.00245182	0.0341181	0.0828254	Nos3	0.00460088	SECs
Agt	0.00245182	0.0341181	0.0828254	Podxl	0.00457233	SECs
Agt	0.00245182	0.0341181	0.0828254	Rgs3	0.00468758	SECs
Agt	0.00245182	0.0341181	0.0828254	Vcam1	0.00516514	CCs
Agt	0.00245182	0.0341181	0.0828254	Edn1	0.0054851	CCs
Agt	0.00245182	0.0341181	0.0828254	Eng	0.00511597	CCs
Agt	0.00245182	0.0341181	0.0828254	Col4a1	0.00455713	TM2
Agt	0.00245182	0.0341181	0.0828254	Mylk	0.00431367	TM1
Agt	0.00245182	0.0341181	0.0828254	Mmp2	0.00506765	TM1
Agt	0.00245182	0.0341181	0.0828254	Tgfb1	0.00441658	BECs
Agt	0.00245182	0.0341181	0.0828254	Timp3	0.00451637	BECs
Agt	0.00245182	0.0341181	0.0828254	Angpt1	0.00467375	TM1
Agt	0.00245182	0.0341181	0.0828254	Tek	0.0053034	BECs
Agt	0.00245182	0.0341181	0.0828254	Slc2a1	0.00431521	BECs
Agt	0.00245182	0.0341181	0.0828254	Eng	0.00511597	SECs
Agt	0.00245182	0.0341181	0.0828254	Col3a1	0.00496101	TM2
Agt	0.00245182	0.0341181	0.0828254	Selp	0.00543394	SECs
Agt	0.00245182	0.0341181	0.0828254	Eng	0.00511597	BECs
Agt	0.00245182	0.0341181	0.0828254	Angpt1	0.00467375	TM2
Agt	0.00245182	0.0341181	0.0828254	Serpine1	0.00533414	SECs
Angpt1	1.10396	1.80953	0.760973	Nos3	0.00291462	CCs
Angpt1	1.10396	1.80953	0.760973	Nfkbia	0.00167215	CCs
Angpt1	1.10396	1.80953	0.760973	Ubc	0.00193215	BECs
Angpt1	1.10396	1.80953	0.760973	Zfp36	0.00174514	BECs
Angpt1	1.10396	1.80953	0.760973	Irf1	0.0016408	BECs
Angpt1	1.10396	1.80953	0.760973	Plec	0.00154611	SECs
Angpt1	1.10396	1.80953	0.760973	Egr1	0.00151423	BECs
Angpt1	1.10396	1.80953	0.760973	Edn1	0.00284611	BECs
Angpt1	1.10396	1.80953	0.760973	Ier3	0.0017	BECs
Angpt1	1.10396	1.80953	0.760973	Nos3	0.00291462	SECs
Angpt1	1.10396	1.80953	0.760973	Lmna	0.00169509	SECs
Angpt1	1.10396	1.80953	0.760973	Sele	0.00249562	CCs
Angpt1	1.10396	1.80953	0.760973	Ets1	0.00162972	SECs
Angpt1	1.10396	1.80953	0.760973	Sele	0.00249562	SECs
Angpt1	1.10396	1.80953	0.760973	Ier2	0.00154052	BECs
Angpt1	1.10396	1.80953	0.760973	Ets1	0.00162972	BECs
Angpt1	1.10396	1.80953	0.760973	Cdh5	0.002647	BECs
Angpt1	1.10396	1.80953	0.760973	Lmna	0.00169509	CCs
Angpt1	1.10396	1.80953	0.760973	Nfkbia	0.00167215	SECs
Angpt1	1.10396	1.80953	0.760973	Itgb1	0.00245169	SECs
Angpt1	1.10396	1.80953	0.760973	Edn1	0.00284611	CCs
Angpt1	1.10396	1.80953	0.760973	Zfp36	0.00174514	CCs
Angpt1	1.10396	1.80953	0.760973	Fas	0.00538668	BECs
Angpt1	1.10396	1.80953	0.760973	Cdh5	0.002647	CCs
Angpt1	1.10396	1.80953	0.760973	Tek	0.0024711	CCs
Angpt1	1.10396	1.80953	0.760973	Tek	0.0024711	BECs
Angpt1	1.10396	1.80953	0.760973	Icam1	0.00252059	CCs
Angpt1	1.10396	1.80953	0.760973	Ets1	0.00162972	CCs
Angpt1	1.10396	1.80953	0.760973	Cdh5	0.002647	SECs
Angpt1	1.10396	1.80953	0.760973	Tcf4	0.00158327	SECs
Angpt1	1.10396	1.80953	0.760973	Nos3	0.00291462	BECs
Angpt1	1.10396	1.80953	0.760973	Id3	0.00195177	BECs
Angpt1	1.10396	1.80953	0.760973	Hes1	0.00181514	BECs
Angpt1	1.10396	1.80953	0.760973	Cdkn1a	0.00232091	SECs
Angpt1	1.10396	1.80953	0.760973	Tek	0.0024711	SECs
Angpt1	1.10396	1.80953	0.760973	Tcf4	0.00158327	BECs
Angpt1	1.10396	1.80953	0.760973	Smad7	0.00295372	BECs
Angpt1	1.10396	1.80953	0.760973	Serpine1	0.00170062	SECs
Apoe	33.3594	35.7625	30.8323	Lef1	0.00414751	BECs
Apoe	33.3594	35.7625	30.8323	Ccl11	0.00566363	TM2
Apoe	33.3594	35.7625	30.8323	Ccl19	0.00646086	TM2
Apoe	33.3594	35.7625	30.8323	Nos3	0.00460863	BECs
Apoe	33.3594	35.7625	30.8323	Vcam1	0.00395713	CCs
Apoe	33.3594	35.7625	30.8323	Spp1	0.00392423	TM2
Apoe	33.3594	35.7625	30.8323	Mfge8	0.00424099	BECs
Apoe	33.3594	35.7625	30.8323	Cyp1b1	0.00429765	TM2
Apoe	33.3594	35.7625	30.8323	Aqp1	0.00468389	CCs
Apoe	33.3594	35.7625	30.8323	Aqp1	0.00468389	BECs
Apoe	33.3594	35.7625	30.8323	Abca1	0.00548961	CCs
Apoe	33.3594	35.7625	30.8323	Hspa1a	0.00436192	BECs
Apoe	33.3594	35.7625	30.8323	Vwf	0.00505118	CCs
Apoe	33.3594	35.7625	30.8323	Selp	0.00540175	CCs
Apoe	33.3594	35.7625	30.8323	Lrp1	0.00445577	TM2
Apoe	33.3594	35.7625	30.8323	Edn1	0.0042447	BECs
Apoe	33.3594	35.7625	30.8323	Cxcl12	0.00439516	CCs
Apoe	33.3594	35.7625	30.8323	Cxcl12	0.00439516	BECs
Apoe	33.3594	35.7625	30.8323	Ccl7	0.00603007	TM2
Apoe	33.3594	35.7625	30.8323	Timp2	0.00420292	TM2
Apoe	33.3594	35.7625	30.8323	Edn1	0.0042447	CCs
Apoe	33.3594	35.7625	30.8323	Plat	0.00428154	TM2
Apoe	33.3594	35.7625	30.8323	Cxcl10	0.00415691	TM2
Apoe	33.3594	35.7625	30.8323	Cxcl12	0.00439516	TM2
Apoe	33.3594	35.7625	30.8323	Wnt5a	0.00437025	TM2
Apoe	33.3594	35.7625	30.8323	Vwf	0.00505118	BECs
Apoe	33.3594	35.7625	30.8323	Nos3	0.00460863	CCs
App	6.11171	3.2878	4.43196	Sostdc1	0.00996948	TM3
App	6.11171	3.2878	4.43196	Apod	0.0100913	TM3
App	6.11171	3.2878	4.43196	Apod	0.0100913	TM1
App	6.11171	3.2878	4.43196	Selenop	0.0116581	TM2
App	6.11171	3.2878	4.43196	Apod	0.0100913	TM2
Bmp2	0.0864427	0.160695	0.166843	Spp1	0.00436668	TM2
Bmp2	0.0864427	0.160695	0.166843	Ihh	0.00269363	BECs
Bmp2	0.0864427	0.160695	0.166843	Tgfb3	0.00245631	TM2
Bmp2	0.0864427	0.160695	0.166843	Klf10	0.0027363	BECs
Bmp2	0.0864427	0.160695	0.166843	Id3	0.00340397	BECs
Bmp2	0.0864427	0.160695	0.166843	Junb	0.00300867	TM2
Bmp2	0.0864427	0.160695	0.166843	Cxcl12	0.00251917	BECs
Bmp2	0.0864427	0.160695	0.166843	Id3	0.00340397	TM2
Bmp2	0.0864427	0.160695	0.166843	Nos3	0.00297874	BECs
Bmp2	0.0864427	0.160695	0.166843	Icam1	0.00246292	TM1
Bmp2	0.0864427	0.160695	0.166843	Smad6	0.00323495	BECs
Bmp2	0.0864427	0.160695	0.166843	Ctnnb1	0.00441693	BECs
Bmp2	0.0864427	0.160695	0.166843	Fos	0.0026328	TM3
Bmp2	0.0864427	0.160695	0.166843	Pgf	0.00278553	TM2
Bmp2	0.0864427	0.160695	0.166843	Cxcl12	0.00251917	TM2
Bmp2	0.0864427	0.160695	0.166843	Id3	0.00340397	TM1
Bmp2	0.0864427	0.160695	0.166843	Fst	0.0027348	TM1
Bmp2	0.0864427	0.160695	0.166843	Acvrl1	0.00239408	BECs
Bmp2	0.0864427	0.160695	0.166843	Cxcl12	0.00251917	TM3
Bmp2	0.0864427	0.160695	0.166843	Mgp	0.00240305	TM2
Bmp2	0.0864427	0.160695	0.166843	Icam1	0.00246292	TM2
Bmp2	0.0864427	0.160695	0.166843	Mgp	0.00240305	TM1
Bmp2	0.0864427	0.160695	0.166843	Tagln	0.00252982	TM1
Bmp2	0.0864427	0.160695	0.166843	Id3	0.00340397	TM3
Bmp2	0.0864427	0.160695	0.166843	Cthrc1	0.00238688	BECs
Bmp2	0.0864427	0.160695	0.166843	Spp1	0.00436668	TM1
Bmp2	0.0864427	0.160695	0.166843	Ctsk	0.00231676	TM2
Bmp2	0.0864427	0.160695	0.166843	Col1a2	0.00581037	TM3
Bmp2	0.0864427	0.160695	0.166843	Ctsk	0.00231676	TM1
Bmp2	0.0864427	0.160695	0.166843	Ednra	0.00255365	TM2
Bmp2	0.0864427	0.160695	0.166843	Col1a2	0.00581037	TM1
Bmp2	0.0864427	0.160695	0.166843	Fgfr3	0.00272198	TM3
Bmp2	0.0864427	0.160695	0.166843	Postn	0.00272715	TM1
Bmp2	0.0864427	0.160695	0.166843	Fos	0.0026328	TM2
Bmp2	0.0864427	0.160695	0.166843	Tie1	0.00264883	BECs
Bmp2	0.0864427	0.160695	0.166843	Aspn	0.00237741	TM1
Bmp2	0.0864427	0.160695	0.166843	Icam1	0.00246292	TM3
Bmp2	0.0864427	0.160695	0.166843	Smad7	0.00347017	BECs
Bmp2	0.0864427	0.160695	0.166843	Ctsk	0.00231676	TM3
Bmp2	0.0864427	0.160695	0.166843	Tfap2b	0.00252307	TM3
Bmp2	0.0864427	0.160695	0.166843	Pth1r	0.00512639	TM3
Bmp2	0.0864427	0.160695	0.166843	Spp1	0.00436668	TM3
Bmp2	0.0864427	0.160695	0.166843	Tgfb3	0.00245631	TM1
Bmp2	0.0864427	0.160695	0.166843	Junb	0.00300867	TM3
Bmp2	0.0864427	0.160695	0.166843	Mgp	0.00240305	TM3
Bmp2	0.0864427	0.160695	0.166843	Tagln	0.00252982	TM3
Bmp2	0.0864427	0.160695	0.166843	Col1a1	0.00439989	TM1
Bmp2	0.0864427	0.160695	0.166843	Postn	0.00272715	TM3
Bmp2	0.0864427	0.160695	0.166843	Msx1	0.00268778	TM3
Bmp2	0.0864427	0.160695	0.166843	Alpl	0.00490076	TM2
Bmp2	0.0864427	0.160695	0.166843	Col1a2	0.00581037	TM2
Bmp2	0.0864427	0.160695	0.166843	Col1a1	0.00439989	TM2
Bmp4	0.135366	0.294094	0.0630551	Smad7	0.00200449	BECs
Bmp4	0.135366	0.294094	0.0630551	Kdr	0.00257562	BECs
Bmp4	0.135366	0.294094	0.0630551	Acvrl1	0.00238479	BECs
Bmp4	0.135366	0.294094	0.0630551	Tgfb1	0.00208827	BECs
Bmp4	0.135366	0.294094	0.0630551	Zfp36	0.00179747	BECs
Bmp4	0.135366	0.294094	0.0630551	Tek	0.00270181	BECs
Bmp4	0.135366	0.294094	0.0630551	Cdkn1a	0.00314606	SECs
Bmp4	0.135366	0.294094	0.0630551	Kdr	0.00257562	SECs
Bmp4	0.135366	0.294094	0.0630551	Ier3	0.00185627	BECs
Bmp4	0.135366	0.294094	0.0630551	Slc2a1	0.00175445	BECs
Bmp4	0.135366	0.294094	0.0630551	Lef1	0.00290252	BECs
Bmp4	0.135366	0.294094	0.0630551	Id3	0.00311342	BECs
Bmp4	0.135366	0.294094	0.0630551	Ier2	0.00174361	BECs
Bmp4	0.135366	0.294094	0.0630551	Lmna	0.00177413	SECs
Bmp4	0.135366	0.294094	0.0630551	Cdh5	0.00264826	SECs
Bmp4	0.135366	0.294094	0.0630551	Smad6	0.00604871	BECs
Bmp4	0.135366	0.294094	0.0630551	Serpine1	0.00195808	SECs
Bmp4	0.135366	0.294094	0.0630551	Hes1	0.00210047	BECs
Bmp4	0.135366	0.294094	0.0630551	Ubc	0.00206521	BECs
Bmp4	0.135366	0.294094	0.0630551	Cdh5	0.00264826	BECs
Bmp4	0.135366	0.294094	0.0630551	Tek	0.00270181	SECs
Bmp4	0.135366	0.294094	0.0630551	Plec	0.0018334	SECs
Bmp4	0.135366	0.294094	0.0630551	Gata2	0.00269793	BECs
Bmp5	0.00653587	0.0030388	0.00620547	Tcim	0.00201584	BECs
Bmp5	0.00653587	0.0030388	0.00620547	Smad7	0.00290005	BECs
Bmp5	0.00653587	0.0030388	0.00620547	Ubc	0.00197317	BECs
Bmp5	0.00653587	0.0030388	0.00620547	Smad6	0.00236973	BECs
Bmp5	0.00653587	0.0030388	0.00620547	Id3	0.00222982	BECs
Bmp5	0.00653587	0.0030388	0.00620547	Zeb2	0.0020725	TM3
Bmp5	0.00653587	0.0030388	0.00620547	Serpine1	0.00214442	SECs
Bmp5	0.00653587	0.0030388	0.00620547	Tcim	0.00201584	SECs
Bmp5	0.00653587	0.0030388	0.00620547	Hes1	0.00210788	BECs
Bmp5	0.00653587	0.0030388	0.00620547	Id3	0.00222982	TM3
Bmp5	0.00653587	0.0030388	0.00620547	Slc2a1	0.0019619	BECs
Bmp5	0.00653587	0.0030388	0.00620547	Rflnb	0.00222648	BECs
Bmp5	0.00653587	0.0030388	0.00620547	Adgrl4	0.00468312	BECs
Bmp5	0.00653587	0.0030388	0.00620547	Tcim	0.00201584	CCs
Bmp5	0.00653587	0.0030388	0.00620547	Cavin3	0.00201807	SECs
Bmp5	0.00653587	0.0030388	0.00620547	Selenow	0.00208829	TM3
Bmp5	0.00653587	0.0030388	0.00620547	Cavin3	0.00201807	CCs
Bmp5	0.00653587	0.0030388	0.00620547	Adgrl4	0.00468312	CCs
Bmp5	0.00653587	0.0030388	0.00620547	Cdkn1a	0.00243776	SECs
Bmp5	0.00653587	0.0030388	0.00620547	Adgrl4	0.00468312	SECs
Bmp5	0.00653587	0.0030388	0.00620547	Fgfr3	0.00522801	TM3
Btc	0.00795206	0.00913874	0.0103615	Fos	0.00115106	TM2
Btc	0.00795206	0.00913874	0.0103615	Zfp36l1	0.000984199	TM2
Btc	0.00795206	0.00913874	0.0103615	Icam1	0.00116536	TM2
Btc	0.00795206	0.00913874	0.0103615	Egr1	0.000980634	TM2
Btc	0.00795206	0.00913874	0.0103615	Cyp1b1	0.00104066	TM2
Btc	0.00795206	0.00913874	0.0103615	Ptgs2	0.00098606	TM2
Btc	0.00795206	0.00913874	0.0103615	Junb	0.00119279	TM2
Btc	0.00795206	0.00913874	0.0103615	Pitx2	0.000969597	TM2
Btc	0.00795206	0.00913874	0.0103615	Cebpb	0.000989815	TM2
Btc	0.00795206	0.00913874	0.0103615	Id2	0.00116473	TM2
Btc	0.00795206	0.00913874	0.0103615	Brd2	0.000972516	TM2
Btc	0.00795206	0.00913874	0.0103615	Id3	0.00405707	TM2
Btc	0.00795206	0.00913874	0.0103615	Irs2	0.00197939	TM2
Btc	0.00795206	0.00913874	0.0103615	Nfkbia	0.0010466	TM2
Btc	0.00795206	0.00913874	0.0103615	Irf1	0.00126417	TM2
Btc	0.00795206	0.00913874	0.0103615	Vegfa	0.00113709	TM2
Btc	0.00795206	0.00913874	0.0103615	Gsn	0.00104614	TM2
Btc	0.00795206	0.00913874	0.0103615	Gadd45b	0.00106773	TM2
Calr	2.17345	1.56722	1.1994	Egfl6	0.00587584	TM1
Calr	2.17345	1.56722	1.1994	Olfml1	0.00612122	TM1
Calr	2.17345	1.56722	1.1994	Ptx4	0.0084386	TM1
Cd24a	0.105777	0.156908	0.143963	Grrp1	0.006195	SECs
Cd24a	0.105777	0.156908	0.143963	Clic5	0.00593818	SECs
Cd24a	0.105777	0.156908	0.143963	Fbln5	0.00529758	SECs
Clcf1	0.103798	0.0930581	0.176021	Hes1	0.00201331	BECs
Clcf1	0.103798	0.0930581	0.176021	Irf1	0.00247446	BECs
Clcf1	0.103798	0.0930581	0.176021	Ier3	0.00220493	BECs
Clcf1	0.103798	0.0930581	0.176021	Atf3	0.00177246	SECs
Clcf1	0.103798	0.0930581	0.176021	Nos3	0.00190231	SECs
Clcf1	0.103798	0.0930581	0.176021	Ets1	0.00183266	SECs
Clcf1	0.103798	0.0930581	0.176021	Id3	0.00218863	BECs
Clcf1	0.103798	0.0930581	0.176021	Rgs3	0.00190713	BECs
Clcf1	0.103798	0.0930581	0.176021	Nos3	0.00190231	BECs
Clcf1	0.103798	0.0930581	0.176021	Ubc	0.00199862	BECs
Clcf1	0.103798	0.0930581	0.176021	Elmo1	0.00194856	SECs
Clcf1	0.103798	0.0930581	0.176021	Rgs3	0.00190713	SECs
Clcf1	0.103798	0.0930581	0.176021	Lmna	0.0019981	SECs
Clcf1	0.103798	0.0930581	0.176021	Atf3	0.00177246	BECs
Clcf1	0.103798	0.0930581	0.176021	Serpine1	0.00178115	SECs
Clcf1	0.103798	0.0930581	0.176021	Ets1	0.00183266	BECs
Clcf1	0.103798	0.0930581	0.176021	Plec	0.00174366	SECs
Clcf1	0.103798	0.0930581	0.176021	Bcr	0.00209578	SECs
Clcf1	0.103798	0.0930581	0.176021	Zfp36	0.0019932	BECs
Clcf1	0.103798	0.0930581	0.176021	Slc2a1	0.00185343	BECs
Clcf1	0.103798	0.0930581	0.176021	Cdkn1a	0.00226333	SECs
Col4a1	1.88171	1.75445	1.2008	Tgfbr2	0.00121701	SECs
Col4a1	1.88171	1.75445	1.2008	Serpine1	0.00130493	SECs
Col4a1	1.88171	1.75445	1.2008	Hexim1	0.00112944	TM2
Col4a1	1.88171	1.75445	1.2008	Ntn1	0.00115824	TM2
Col4a1	1.88171	1.75445	1.2008	Id3	0.00147693	BECs
Col4a1	1.88171	1.75445	1.2008	Junb	0.00124071	TM2
Col4a1	1.88171	1.75445	1.2008	Gsn	0.00115634	TM2
Col4a1	1.88171	1.75445	1.2008	Fos	0.00112175	TM2
Col4a1	1.88171	1.75445	1.2008	Hes1	0.0013251	BECs
Col4a1	1.88171	1.75445	1.2008	Id3	0.00147693	TM2
Col4a1	1.88171	1.75445	1.2008	Id3	0.00147693	TM1
Col4a1	1.88171	1.75445	1.2008	Nfkbia	0.00115383	TM2
Col4a1	1.88171	1.75445	1.2008	Id2	0.00114007	TM2
Col4a1	1.88171	1.75445	1.2008	Plec	0.00135502	SECs
Col4a1	1.88171	1.75445	1.2008	Fli1	0.00119348	SECs
Col4a1	1.88171	1.75445	1.2008	Ntn1	0.00115824	SECs
Col4a1	1.88171	1.75445	1.2008	Ubc	0.00124804	BECs
Col4a1	1.88171	1.75445	1.2008	Zfp36l1	0.00115524	TM2
Col4a1	1.88171	1.75445	1.2008	Hexim1	0.00112944	TM1
Col4a1	1.88171	1.75445	1.2008	Vegfa	0.00132319	TM2
Col4a1	1.88171	1.75445	1.2008	Ier3	0.00118216	BECs
Col4a1	1.88171	1.75445	1.2008	Cbfa2t3	0.00111922	BECs
Col4a1	1.88171	1.75445	1.2008	Tgfbr2	0.00121701	TM1
Col4a1	1.88171	1.75445	1.2008	Atf3	0.00115978	BECs
Col4a1	1.88171	1.75445	1.2008	Atf3	0.00115978	SECs
Col4a1	1.88171	1.75445	1.2008	Gadd45b	0.00112317	TM2
Col4a1	1.88171	1.75445	1.2008	Cdkn1a	0.00152309	SECs
Col4a1	1.88171	1.75445	1.2008	Gadd45b	0.00112317	TM3
Col4a1	1.88171	1.75445	1.2008	Nos3	0.00110281	SECs
Col4a1	1.88171	1.75445	1.2008	Fli1	0.00119348	BECs
Col4a1	1.88171	1.75445	1.2008	Gadd45b	0.00112317	TM1
Col4a1	1.88171	1.75445	1.2008	Hes1	0.0013251	TM1
Col4a1	1.88171	1.75445	1.2008	Gsn	0.00115634	TM1
Col4a1	1.88171	1.75445	1.2008	Cyp1b1	0.0011124	TM2
Col4a1	1.88171	1.75445	1.2008	Id2	0.00114007	TM1
Col4a1	1.88171	1.75445	1.2008	Lmna	0.00109806	TM1
Col4a1	1.88171	1.75445	1.2008	Slc2a1	0.00116385	BECs
Col4a1	1.88171	1.75445	1.2008	Ptma	0.00129265	TM3
Col4a1	1.88171	1.75445	1.2008	Smad7	0.00143067	BECs
Col4a1	1.88171	1.75445	1.2008	Junb	0.00124071	TM3
Col4a1	1.88171	1.75445	1.2008	Sgk1	0.0011847	BECs
Col4a1	1.88171	1.75445	1.2008	Runx1	0.00122304	TM1
Col4a1	1.88171	1.75445	1.2008	Cebpb	0.00111465	TM2
Col4a1	1.88171	1.75445	1.2008	Lifr	0.00121109	BECs
Col4a1	1.88171	1.75445	1.2008	Nr2f2	0.00111756	TM3
Col4a1	1.88171	1.75445	1.2008	Ltbp1	0.0011075	TM3
Col4a1	1.88171	1.75445	1.2008	Lef1	0.00119918	BECs
Col4a1	1.88171	1.75445	1.2008	Edn1	0.00112458	BECs
Col4a1	1.88171	1.75445	1.2008	Cbfa2t3	0.00111922	SECs
Col4a1	1.88171	1.75445	1.2008	Id3	0.00147693	TM3
Col4a1	1.88171	1.75445	1.2008	Zfhx3	0.00113565	TM1
Col4a1	1.88171	1.75445	1.2008	Lmna	0.00109806	SECs
Col4a1	1.88171	1.75445	1.2008	Nfkbia	0.00115383	SECs
Col4a1	1.88171	1.75445	1.2008	Serpine1	0.00130493	TM1
Col4a1	1.88171	1.75445	1.2008	Mcl1	0.00114662	BECs
Col4a1	1.88171	1.75445	1.2008	Nos3	0.00110281	BECs
Col4a1	1.88171	1.75445	1.2008	Smad6	0.00117054	BECs
Col4a1	1.88171	1.75445	1.2008	Brd2	0.00114037	TM2
Col4a1	1.88171	1.75445	1.2008	Fos	0.00112175	TM3
Col5a3	0.152134	0.123215	0.0596285	Atf3	0.00122549	SECs
Col5a3	0.152134	0.123215	0.0596285	Lmna	0.00119289	SECs
Col5a3	0.152134	0.123215	0.0596285	Sptbn1	0.00127368	SECs
Col5a3	0.152134	0.123215	0.0596285	Serpine1	0.00149564	SECs
Col5a3	0.152134	0.123215	0.0596285	Rgs3	0.00118093	SECs
Col5a3	0.152134	0.123215	0.0596285	Nfkbia	0.0011956	SECs
Col5a3	0.152134	0.123215	0.0596285	Ets1	0.00128887	SECs
Col5a3	0.152134	0.123215	0.0596285	Tgfbr2	0.00127493	SECs
Col5a3	0.152134	0.123215	0.0596285	Plec	0.00124214	SECs
Col5a3	0.152134	0.123215	0.0596285	Cdkn1a	0.00177073	SECs
Crlf1	0.408015	0.162763	0.322351	Elmo1	0.00236054	SECs
Crlf1	0.408015	0.162763	0.322351	Nos3	0.00226708	SECs
Crlf1	0.408015	0.162763	0.322351	Bcr	0.00251239	SECs
Crlf1	0.408015	0.162763	0.322351	Id3	0.00238214	BECs
Crlf1	0.408015	0.162763	0.322351	Lmna	0.00224925	SECs
Crlf1	0.408015	0.162763	0.322351	Gadd45g	0.00236862	SECs
Crlf1	0.408015	0.162763	0.322351	Nos3	0.00226708	BECs
Crlf1	0.408015	0.162763	0.322351	Fli1	0.00257722	BECs
Crlf1	0.408015	0.162763	0.322351	Gadd45g	0.00236862	BECs
Crlf1	0.408015	0.162763	0.322351	Cdkn1a	0.00233881	SECs
Crlf1	0.408015	0.162763	0.322351	Slc2a1	0.00253595	BECs
Crlf1	0.408015	0.162763	0.322351	Lmo2	0.00239675	SECs
Crlf1	0.408015	0.162763	0.322351	Gata2	0.00242831	BECs
Crlf1	0.408015	0.162763	0.322351	Fli1	0.00257722	SECs
Crlf1	0.408015	0.162763	0.322351	Ubc	0.00231812	BECs
Crlf1	0.408015	0.162763	0.322351	Irf1	0.00261051	BECs
Crlf1	0.408015	0.162763	0.322351	Lmo2	0.00239675	BECs
Crlf1	0.408015	0.162763	0.322351	Btg2	0.00230064	BECs
Crlf1	0.408015	0.162763	0.322351	Hes1	0.00258556	BECs
Crlf1	0.408015	0.162763	0.322351	Zfp36	0.00221098	BECs
Cxcl12	0.975687	9.08759	12.6851	Cebpb	0.00411864	TM2
Cxcl12	0.975687	9.08759	12.6851	Egr1	0.00213443	TM2
Cxcl12	0.975687	9.08759	12.6851	Nfkbia	0.00123138	TM2
Cxcl12	0.975687	9.08759	12.6851	Mmp14	0.00206926	TM2
Cxcl12	0.975687	9.08759	12.6851	Irf1	0.0013793	TM2
Cxcl12	0.975687	9.08759	12.6851	Ier2	0.00115119	TM2
Cxcl12	0.975687	9.08759	12.6851	Icam1	0.0012262	TM2
Cxcl12	0.975687	9.08759	12.6851	Id3	0.00125995	TM2
Cxcl12	0.975687	9.08759	12.6851	Klf9	0.00114073	TM2
Cxcl12	0.975687	9.08759	12.6851	Fos	0.00141949	TM2
Cxcl12	0.975687	9.08759	12.6851	Kitl	0.00216046	TM2
Cxcl12	0.975687	9.08759	12.6851	Fgfr1	0.00206512	TM2
Cxcl12	0.975687	9.08759	12.6851	Gsn	0.00436968	TM2
Cxcl12	0.975687	9.08759	12.6851	Vegfa	0.00430545	TM2
Cxcl12	0.975687	9.08759	12.6851	Gadd45b	0.00129663	TM2
Cxcl12	0.975687	9.08759	12.6851	Zfp36l1	0.00122539	TM2
Cxcl12	0.975687	9.08759	12.6851	Junb	0.00129011	TM2
Dll1	0.00713021	0.0675071	0.0187076	Cbfa2t3	0.00167756	BECs
Dll1	0.00713021	0.0675071	0.0187076	Tcf4	0.00171876	TM3
Dll1	0.00713021	0.0675071	0.0187076	Smad7	0.00166098	BECs
Dll1	0.00713021	0.0675071	0.0187076	Grcc10	0.00176752	TM3
Dll1	0.00713021	0.0675071	0.0187076	Nrp1	0.00260872	BECs
Dll1	0.00713021	0.0675071	0.0187076	Dll4	0.00183792	BECs
Dll1	0.00713021	0.0675071	0.0187076	Hes1	0.00388673	BECs
Dll1	0.00713021	0.0675071	0.0187076	Notch4	0.00177803	BECs
Dll1	0.00713021	0.0675071	0.0187076	Notch1	0.00228181	BECs
Dll1	0.00713021	0.0675071	0.0187076	Id3	0.00169006	TM3
Dll1	0.00713021	0.0675071	0.0187076	Gadd45b	0.00173919	TM3
Dll1	0.00713021	0.0675071	0.0187076	Nrp1	0.00260872	TM3
Dll1	0.00713021	0.0675071	0.0187076	Mecom	0.00169018	BECs
Dll1	0.00713021	0.0675071	0.0187076	Kdr	0.00243955	BECs
Dll1	0.00713021	0.0675071	0.0187076	Id3	0.00169006	BECs
Dll1	0.00713021	0.0675071	0.0187076	Zfp36	0.00186793	BECs
Dll1	0.00713021	0.0675071	0.0187076	Junb	0.00203013	TM3
Dll1	0.00713021	0.0675071	0.0187076	Tcf4	0.00171876	BECs
Dll1	0.00713021	0.0675071	0.0187076	Ubc	0.00180417	BECs
Dll1	0.00713021	0.0675071	0.0187076	Ptma	0.00191339	TM3
Dsc3	0.0951621	0.0643603	0.743518	Igfbp5	0.00160157	TM2
Dsc3	0.0951621	0.0643603	0.743518	Igfbp5	0.00160157	TM3
Dsc3	0.0951621	0.0643603	0.743518	Pcdh17	0.00154095	CCs
Dsc3	0.0951621	0.0643603	0.743518	Sox17	0.00171058	CCs
Dsc3	0.0951621	0.0643603	0.743518	Igf2	0.00154607	TM2
Dsc3	0.0951621	0.0643603	0.743518	Foxf2	0.00148355	TM2
Dsc3	0.0951621	0.0643603	0.743518	Igf2	0.00154607	TM3
Dsc3	0.0951621	0.0643603	0.743518	Foxc1	0.00161649	TM3
Dsc3	0.0951621	0.0643603	0.743518	Igf2	0.00154607	TM1
Dsc3	0.0951621	0.0643603	0.743518	Fli1	0.00152623	CCs
Dsc3	0.0951621	0.0643603	0.743518	Foxc1	0.00161649	TM2
Dsc3	0.0951621	0.0643603	0.743518	Fst	0.00153699	TM1
Dsc3	0.0951621	0.0643603	0.743518	Nr2f2	0.00160585	TM3
Dsc3	0.0951621	0.0643603	0.743518	Mecom	0.0014833	CCs
Dsc3	0.0951621	0.0643603	0.743518	Msx1	0.00160122	TM3
Dsc3	0.0951621	0.0643603	0.743518	Igfbp5	0.00160157	TM1
Edn1	0.010658	0.0243744	0.00947504	Fst	0.00242603	TM1
Edn1	0.010658	0.0243744	0.00947504	Vegfa	0.00248199	TM2
Edn1	0.010658	0.0243744	0.00947504	Col1a2	0.00430284	TM1
Edn1	0.010658	0.0243744	0.00947504	Col1a1	0.00406632	TM1
Edn1	0.010658	0.0243744	0.00947504	Gadd45b	0.00155143	TM1
Edn1	0.010658	0.0243744	0.00947504	Icam1	0.00229219	TM1
Edn1	0.010658	0.0243744	0.00947504	Plat	0.00217843	TM1
Edn1	0.010658	0.0243744	0.00947504	Col3a1	0.00507425	TM1
Edn1	0.010658	0.0243744	0.00947504	Vim	0.00214615	TM2
Edn1	0.010658	0.0243744	0.00947504	Egr1	0.00224949	TM1
Edn1	0.010658	0.0243744	0.00947504	Col3a1	0.00507425	TM2
Edn1	0.010658	0.0243744	0.00947504	Calcrl	0.00481866	TM2
Edn1	0.010658	0.0243744	0.00947504	Col1a1	0.00406632	TM2
Edn1	0.010658	0.0243744	0.00947504	Vim	0.00214615	TM1
Edn1	0.010658	0.0243744	0.00947504	Ptgs2	0.00399951	TM2
Edn1	0.010658	0.0243744	0.00947504	Hif1a	0.0021587	TM1
Edn1	0.010658	0.0243744	0.00947504	Cysltr1	0.00566012	TM2
Edn1	0.010658	0.0243744	0.00947504	Timp1	0.00195713	TM1
Edn1	0.010658	0.0243744	0.00947504	Icam1	0.00229219	TM2
Edn1	0.010658	0.0243744	0.00947504	Col1a2	0.00430284	TM2
Edn1	0.010658	0.0243744	0.00947504	Plat	0.00217843	TM2
Edn1	0.010658	0.0243744	0.00947504	Egr1	0.00224949	TM2
Edn1	0.010658	0.0243744	0.00947504	Sod3	0.00226081	TM1
Edn1	0.010658	0.0243744	0.00947504	Vcam1	0.00526813	TM1
Edn1	0.010658	0.0243744	0.00947504	Ptgs2	0.00399951	TM1
Edn1	0.010658	0.0243744	0.00947504	Gadd45b	0.00155143	TM2
Edn1	0.010658	0.0243744	0.00947504	Fos	0.00228708	TM2
Edn1	0.010658	0.0243744	0.00947504	Serpine1	0.00154296	TM1
Egf	0.000907443	0.00279976	0.00162215	Mcl1	0.00545245	BECs
Egf	0.000907443	0.00279976	0.00162215	Tm4sf1	0.00501916	BECs
Egf	0.000907443	0.00279976	0.00162215	Cebpd	0.00625229	SECs
Egf	0.000907443	0.00279976	0.00162215	Lcn2	0.00547434	SECs
Egf	0.000907443	0.00279976	0.00162215	Cav1	0.00554214	SECs
Egf	0.000907443	0.00279976	0.00162215	Fas	0.0053195	BECs
Egf	0.000907443	0.00279976	0.00162215	Col6a3	0.00561815	TM1
Egf	0.000907443	0.00279976	0.00162215	Cebpd	0.00625229	TM3
Egf	0.000907443	0.00279976	0.00162215	Tgfbr2	0.00583861	TM1
Egf	0.000907443	0.00279976	0.00162215	Serpine1	0.00534384	TM1
Egf	0.000907443	0.00279976	0.00162215	Cp	0.00509343	SECs
Egf	0.000907443	0.00279976	0.00162215	Col15a1	0.00510061	BECs
Egf	0.000907443	0.00279976	0.00162215	Plaur	0.0054576	BECs
Egf	0.000907443	0.00279976	0.00162215	Mmp2	0.00511828	TM1
Egf	0.000907443	0.00279976	0.00162215	Dlc1	0.00499605	BECs
Egf	0.000907443	0.00279976	0.00162215	Macf1	0.00514612	BECs
Egf	0.000907443	0.00279976	0.00162215	Pdgfrb	0.00504761	TM3
Egf	0.000907443	0.00279976	0.00162215	Postn	0.00534706	TM3
Egf	0.000907443	0.00279976	0.00162215	Junb	0.00522126	TM3
Egf	0.000907443	0.00279976	0.00162215	Thbs1	0.0055345	TM1
Egf	0.000907443	0.00279976	0.00162215	Macf1	0.00514612	SECs
Egf	0.000907443	0.00279976	0.00162215	Col3a1	0.00496314	TM3
Egf	0.000907443	0.00279976	0.00162215	Col3a1	0.00496314	TM1
Egf	0.000907443	0.00279976	0.00162215	Utrn	0.00531871	SECs
Egf	0.000907443	0.00279976	0.00162215	Tm4sf1	0.00501916	SECs
Egf	0.000907443	0.00279976	0.00162215	Ccm2l	0.00755265	SECs
Egf	0.000907443	0.00279976	0.00162215	Cp	0.00509343	TM3
Egf	0.000907443	0.00279976	0.00162215	Irs2	0.00552904	TM3
Egf	0.000907443	0.00279976	0.00162215	Postn	0.00534706	TM1
Egf	0.000907443	0.00279976	0.00162215	Nr2f2	0.00549644	TM3
Egf	0.000907443	0.00279976	0.00162215	Pdgfrb	0.00504761	TM1
Egf	0.000907443	0.00279976	0.00162215	Serpine1	0.00534384	SECs
Egf	0.000907443	0.00279976	0.00162215	Tgfbr2	0.00583861	SECs
Egf	0.000907443	0.00279976	0.00162215	Abcb1a	0.00537331	BECs
Egf	0.000907443	0.00279976	0.00162215	Cemip	0.00508283	TM3
Egf	0.000907443	0.00279976	0.00162215	Ccm2l	0.00755265	BECs
Egf	0.000907443	0.00279976	0.00162215	Cpxm2	0.00557987	TM1
Egf	0.000907443	0.00279976	0.00162215	Irs2	0.00552904	TM1
Egf	0.000907443	0.00279976	0.00162215	Cav1	0.00554214	BECs
Egf	0.000907443	0.00279976	0.00162215	Cebpd	0.00625229	TM1
F2	0	0	0.00256002	Entpd1	0.00452611	BECs
F2	0	0	0.00256002	Nes	0.00210602	BECs
F2	0	0	0.00256002	Edn1	0.00415479	CCs
F2	0	0	0.00256002	Atf3	0.00107567	CCs
F2	0	0	0.00256002	Cdkn1a	0.00152756	SECs
F2	0	0	0.00256002	Plec	0.00114781	SECs
F2	0	0	0.00256002	Icam1	0.00105814	TM1
F2	0	0	0.00256002	Nfkbia	0.00111744	SECs
F2	0	0	0.00256002	Atf3	0.00107567	BECs
F2	0	0	0.00256002	Sgk1	0.00219151	BECs
F2	0	0	0.00256002	Ier3	0.00118549	BECs
F2	0	0	0.00256002	Ahnak	0.00110374	CCs
F2	0	0	0.00256002	Hexim1	0.00103932	TM1
F2	0	0	0.00256002	Gadd45b	0.00121812	TM1
F2	0	0	0.00256002	Lmna	0.00113448	SECs
F2	0	0	0.00256002	Slc2a1	0.00107027	BECs
F2	0	0	0.00256002	Entpd1	0.00452611	SECs
F2	0	0	0.00256002	Smad7	0.00106623	BECs
F2	0	0	0.00256002	Edn1	0.00415479	BECs
F2	0	0	0.00256002	Serpine1	0.00514875	SECs
F2	0	0	0.00256002	Hes1	0.00114715	TM1
F2	0	0	0.00256002	Selp	0.00756238	CCs
F2	0	0	0.00256002	Lmna	0.00113448	TM1
F2	0	0	0.00256002	Zfp36	0.00111666	CCs
F2	0	0	0.00256002	Id2	0.00105075	TM1
F2	0	0	0.00256002	Selp	0.00756238	SECs
F2	0	0	0.00256002	Zfp36	0.00111666	BECs
F2	0	0	0.00256002	Atf3	0.00107567	SECs
F2	0	0	0.00256002	Id3	0.00108844	BECs
F2	0	0	0.00256002	Sele	0.00459093	CCs
F2	0	0	0.00256002	Id3	0.00108844	TM1
F2	0	0	0.00256002	Icam1	0.00105814	CCs
F2	0	0	0.00256002	Il6	0.00368867	CCs
F2	0	0	0.00256002	Hes1	0.00114715	BECs
F2	0	0	0.00256002	Tnc	0.00213736	TM1
F2	0	0	0.00256002	Entpd1	0.00452611	CCs
F2	0	0	0.00256002	Sele	0.00459093	SECs
F2	0	0	0.00256002	Lmna	0.00113448	CCs
F2	0	0	0.00256002	Angpt1	0.00458768	TM1
F2	0	0	0.00256002	Tbxa2r	0.0020764	BECs
F2	0	0	0.00256002	Serpine1	0.00514875	TM1
F2	0	0	0.00256002	Nfkbia	0.00111744	CCs
F2	0	0	0.00256002	Ubc	0.00127017	BECs
F2	0	0	0.00256002	Ptgs2	0.00469778	TM1
Fasl	0	0.00395244	0	Lmna	0.00134261	CCs
Fasl	0	0.00395244	0	Zfp36	0.00132743	CCs
Fasl	0	0.00395244	0	Plec	0.00138013	SECs
Fasl	0	0.00395244	0	Ets1	0.00133715	CCs
Fasl	0	0.00395244	0	Icam1	0.00129779	CCs
Fasl	0	0.00395244	0	Il6	0.00188943	CCs
Fasl	0	0.00395244	0	Ets1	0.00133715	SECs
Fasl	0	0.00395244	0	Cdkn1a	0.0018078	SECs
Fasl	0	0.00395244	0	Nfkbia	0.00256045	CCs
Fasl	0	0.00395244	0	Lmna	0.00134261	SECs
Fasl	0	0.00395244	0	Atf3	0.00123733	CCs
Fasl	0	0.00395244	0	Serpine1	0.00126184	SECs
Fasl	0	0.00395244	0	Atf3	0.00123733	SECs
Fasl	0	0.00395244	0	Vcam1	0.00205612	CCs
Fasl	0	0.00395244	0	Ahnak	0.00133233	CCs
Fasl	0	0.00395244	0	Nfkbia	0.00256045	SECs
Fasl	0	0.00395244	0	Edn1	0.00128999	CCs
Fat1	1.00438	0.297671	0.505479	Zfp503	0.00111804	BECs
Fat1	1.00438	0.297671	0.505479	Ier3	0.00115866	BECs
Fat1	1.00438	0.297671	0.505479	Id3	0.00125932	BECs
Fat1	1.00438	0.297671	0.505479	Hes1	0.00127938	BECs
Fat1	1.00438	0.297671	0.505479	Fli1	0.00111164	BECs
Fat1	1.00438	0.297671	0.505479	Smad7	0.00115137	BECs
Fat1	1.00438	0.297671	0.505479	Lef1	0.00117899	BECs
Fat1	1.00438	0.297671	0.505479	Atf3	0.00128246	BECs
Fat1	1.00438	0.297671	0.505479	Zfp36	0.00111076	BECs
Fat1	1.00438	0.297671	0.505479	Sox17	0.00112981	BECs
Fat1	1.00438	0.297671	0.505479	Ubc	0.00132433	BECs
Fat1	1.00438	0.297671	0.505479	Mecom	0.0011101	BECs
Fgf1	0.0917301	0.0459605	0.030596	Gadd45b	0.00137613	TM3
Fgf1	0.0917301	0.0459605	0.030596	Ccnd2	0.00124076	TM3
Fgf1	0.0917301	0.0459605	0.030596	Gsn	0.00120151	TM1
Fgf1	0.0917301	0.0459605	0.030596	Fos	0.00135949	TM3
Fgf1	0.0917301	0.0459605	0.030596	Gadd45b	0.00137613	TM1
Fgf1	0.0917301	0.0459605	0.030596	Comp	0.00266824	TM1
Fgf1	0.0917301	0.0459605	0.030596	Icam1	0.00127275	TM1
Fgf1	0.0917301	0.0459605	0.030596	Irf1	0.00124612	TM3
Fgf1	0.0917301	0.0459605	0.030596	Hes1	0.0013977	TM1
Fgf1	0.0917301	0.0459605	0.030596	Spp1	0.00405194	TM1
Fgf1	0.0917301	0.0459605	0.030596	Apoe	0.00209526	TM1
Fgf1	0.0917301	0.0459605	0.030596	Serpine1	0.00240747	TM1
Fgf1	0.0917301	0.0459605	0.030596	Id3	0.00144978	TM3
Fgf1	0.0917301	0.0459605	0.030596	Icam1	0.00127275	TM3
Fgf1	0.0917301	0.0459605	0.030596	Sparc	0.00224052	TM1
Fgf1	0.0917301	0.0459605	0.030596	Fgfr1	0.00435538	TM1
Fgf1	0.0917301	0.0459605	0.030596	Apoe	0.00209526	TM3
Fgf1	0.0917301	0.0459605	0.030596	Postn	0.00528132	TM1
Fgf1	0.0917301	0.0459605	0.030596	Id2	0.00127531	TM1
Fgf1	0.0917301	0.0459605	0.030596	Timp1	0.00185061	TM1
Fgf1	0.0917301	0.0459605	0.030596	Ccnd2	0.00124076	TM1
Fgf1	0.0917301	0.0459605	0.030596	Sparc	0.00224052	TM3
Fgf1	0.0917301	0.0459605	0.030596	Ptma	0.00138022	TM3
Fgf1	0.0917301	0.0459605	0.030596	Plat	0.00218565	TM1
Fgf1	0.0917301	0.0459605	0.030596	Junb	0.0013797	TM3
Fgf1	0.0917301	0.0459605	0.030596	Lmna	0.00127899	TM1
Fgf1	0.0917301	0.0459605	0.030596	Id3	0.00144978	TM1
Fgf1	0.0917301	0.0459605	0.030596	Spp1	0.00405194	TM3
Fgf1	0.0917301	0.0459605	0.030596	Postn	0.00528132	TM3
Fgf15	0	0	0	Ccnd3	0.00120751	TM3
Fgf15	0	0	0	Egr1	0.00214568	TM3
Fgf15	0	0	0	Fos	0.00126479	TM3
Fgf15	0	0	0	Icam1	0.00123963	TM3
Fgf15	0	0	0	Id3	0.00130935	TM3
Fgf15	0	0	0	Irf1	0.0010934	TM3
Fgf15	0	0	0	Gadd45b	0.00133373	TM3
Fgf15	0	0	0	Klf9	0.00114558	TM3
Fgf15	0	0	0	Ptma	0.00132163	TM3
Fgf15	0	0	0	Socs3	0.00108977	TM3
Fgf15	0	0	0	Junb	0.00119547	TM3
Fgf15	0	0	0	Ccnd2	0.00118227	TM3
Fgf17	0.00341689	0.00197622	0.00273772	Ccnd2	0.00113348	TM3
Fgf17	0.00341689	0.00197622	0.00273772	Irf1	0.00109623	TM3
Fgf17	0.00341689	0.00197622	0.00273772	Junb	0.00107495	TM3
Fgf17	0.00341689	0.00197622	0.00273772	Icam1	0.00113251	TM3
Fgf17	0.00341689	0.00197622	0.00273772	Nr2f1	0.00197901	TM3
Fgf17	0.00341689	0.00197622	0.00273772	Fgfr3	0.00222863	TM3
Fgf17	0.00341689	0.00197622	0.00273772	Id3	0.00123499	TM3
Fgf17	0.00341689	0.00197622	0.00273772	Socs3	0.0010004	TM3
Fgf17	0.00341689	0.00197622	0.00273772	Cited2	0.000939998	TM3
Fgf17	0.00341689	0.00197622	0.00273772	Egr1	0.00102091	TM3
Fgf17	0.00341689	0.00197622	0.00273772	Fos	0.0012142	TM3
Fgf17	0.00341689	0.00197622	0.00273772	Gadd45b	0.0010508	TM3
Fgf17	0.00341689	0.00197622	0.00273772	Nr2f2	0.0010182	TM3
Fgf17	0.00341689	0.00197622	0.00273772	Ptma	0.00120122	TM3
Fgf17	0.00341689	0.00197622	0.00273772	Ccnd3	0.00112417	TM3
Fgf2	0.219964	0.15049	0.124825	Igf2	0.00271181	TM2
Fgf2	0.219964	0.15049	0.124825	Hif1a	0.00495313	TM1
Fgf2	0.219964	0.15049	0.124825	Junb	0.0027696	TM2
Fgf2	0.219964	0.15049	0.124825	Vegfa	0.00466083	TM2
Fgf2	0.219964	0.15049	0.124825	Nrp1	0.00416437	TM2
Fgf2	0.219964	0.15049	0.124825	Pth1r	0.00257095	TM3
Fgf2	0.219964	0.15049	0.124825	Cyp1b1	0.00461606	TM2
Fgf2	0.219964	0.15049	0.124825	Fos	0.00458757	TM2
Fgf2	0.219964	0.15049	0.124825	Igf2	0.00271181	TM3
Fgf2	0.219964	0.15049	0.124825	Ptn	0.0025675	TM2
Fgf2	0.219964	0.15049	0.124825	Runx1	0.002632	TM1
Fgf2	0.219964	0.15049	0.124825	Pdgfrb	0.00264716	TM3
Fgf2	0.219964	0.15049	0.124825	Nrp1	0.00416437	TM3
Fgf2	0.219964	0.15049	0.124825	Mmp3	0.00256756	TM1
Fgf2	0.219964	0.15049	0.124825	Igf2	0.00271181	TM1
Fgf2	0.219964	0.15049	0.124825	Junb	0.0027696	TM3
Fgf2	0.219964	0.15049	0.124825	Foxc1	0.00261774	TM2
Fgf2	0.219964	0.15049	0.124825	Hgf	0.0064975	TM3
Fgf2	0.219964	0.15049	0.124825	Serpine1	0.00561307	TM1
Fgf2	0.219964	0.15049	0.124825	Foxc1	0.00261774	TM3
Fgf2	0.219964	0.15049	0.124825	Mmp2	0.00523831	TM1
Fgf2	0.219964	0.15049	0.124825	Ccnd2	0.00261561	TM1
Fgf2	0.219964	0.15049	0.124825	Pgf	0.00268706	TM2
Fgf2	0.219964	0.15049	0.124825	Ccnd2	0.00261561	TM3
Fgf2	0.219964	0.15049	0.124825	Fos	0.00458757	TM3
Fgf2	0.219964	0.15049	0.124825	Fmod	0.00272894	TM1
Fgf2	0.219964	0.15049	0.124825	Pdgfrb	0.00264716	TM1
Fgf2	0.219964	0.15049	0.124825	Ccnd3	0.00425854	TM3
Fgf2	0.219964	0.15049	0.124825	Pdgfrb	0.00264716	TM2
Fgf2	0.219964	0.15049	0.124825	Hes1	0.00276757	TM1
Fgf8	0	0	0	Fgfr3	0.00257147	TM3
Fgf8	0	0	0	Fos	0.00164474	TM3
Fgf8	0	0	0	Nr4a2	0.0041591	TM3
Fgf8	0	0	0	Ptma	0.00172436	TM3
Fgf8	0	0	0	Msx1	0.00254589	TM3
Fgf8	0	0	0	Cited2	0.0014966	TM3
Fgf8	0	0	0	Gadd45b	0.00163634	TM3
Fgf8	0	0	0	Id3	0.0016501	TM3
Fgf8	0	0	0	Nr2f1	0.00257976	TM3
Fgf8	0	0	0	Nr2f2	0.00157828	TM3
Fgf8	0	0	0	Junb	0.00166296	TM3
Gdf6	0	0.00245475	0.0173986	Smad6	0.00386653	BECs
Gdf6	0	0.00245475	0.0173986	Bmpr2	0.00238876	BECs
Gdf6	0	0.00245475	0.0173986	Fscn1	0.00210974	SECs
Gdf6	0	0.00245475	0.0173986	Serpine1	0.00255507	SECs
Gdf6	0	0.00245475	0.0173986	Btg2	0.00233488	BECs
Gdf6	0	0.00245475	0.0173986	Sgk1	0.00221275	BECs
Gdf6	0	0.00245475	0.0173986	Dlc1	0.0020619	BECs
Gdf6	0	0.00245475	0.0173986	Slc2a1	0.00234862	BECs
Gdf6	0	0.00245475	0.0173986	Klf10	0.00226302	BECs
Gdf6	0	0.00245475	0.0173986	Smad1	0.00233806	SECs
Gdf6	0	0.00245475	0.0173986	Nedd9	0.00226147	SECs
Gdf6	0	0.00245475	0.0173986	Cdkn1a	0.00261402	SECs
Gdf6	0	0.00245475	0.0173986	Smad7	0.00396922	BECs
Gdf6	0	0.00245475	0.0173986	Elk3	0.00233639	BECs
Gdf6	0	0.00245475	0.0173986	Sptbn1	0.00213767	SECs
Gdf6	0	0.00245475	0.0173986	Id3	0.00386367	BECs
Gdf6	0	0.00245475	0.0173986	Arid5a	0.00214936	SECs
Gdf6	0	0.00245475	0.0173986	Sptbn1	0.00213767	BECs
Gdf6	0	0.00245475	0.0173986	Lef1	0.00240335	BECs
Gdf6	0	0.00245475	0.0173986	Hes1	0.00227178	BECs
Gdf6	0	0.00245475	0.0173986	Elk3	0.00233639	SECs
Gdf6	0	0.00245475	0.0173986	Edn1	0.00204355	BECs
Gpha2	12.4377	0.446686	0.0806636	Serpine1	0.000992341	SECs
Gpha2	12.4377	0.446686	0.0806636	Maf	0.00104489	SECs
Gpha2	12.4377	0.446686	0.0806636	Lmna	0.00110537	SECs
Gpha2	12.4377	0.446686	0.0806636	Sptbn1	0.00105867	SECs
Gpha2	12.4377	0.446686	0.0806636	Plec	0.00103036	SECs
Gpha2	12.4377	0.446686	0.0806636	Ets1	0.000978584	SECs
Gpha2	12.4377	0.446686	0.0806636	Nfkbia	0.000983551	SECs
Gpha2	12.4377	0.446686	0.0806636	Cdkn1a	0.00137626	SECs
Hgf	0.138736	0.433948	0.859193	Kdr	0.0022888	BECs
Hgf	0.138736	0.433948	0.859193	Ets1	0.00282392	BECs
Hgf	0.138736	0.433948	0.859193	Nos3	0.00276596	BECs
Hgf	0.138736	0.433948	0.859193	Tgfb1	0.00346494	BECs
Hgf	0.138736	0.433948	0.859193	Egr1	0.00246988	BECs
Hgf	0.138736	0.433948	0.859193	Ctnnb1	0.00237663	BECs
Hgf	0.138736	0.433948	0.859193	Plaur	0.00227918	BECs
Hgf	0.138736	0.433948	0.859193	Col4a1	0.00466413	BECs
Hgf	0.138736	0.433948	0.859193	Mcl1	0.00254599	BECs
Hgf	0.138736	0.433948	0.859193	Anxa3	0.00434827	BECs
Hgf	0.138736	0.433948	0.859193	Bmpr2	0.00209356	BECs
Hgf	0.138736	0.433948	0.859193	Fas	0.00235803	BECs
Hgf	0.138736	0.433948	0.859193	Sod1	0.00235817	BECs
Hmgb1	7.25349	9.26444	10.4326	Sele	0.00502628	CCs
Hmgb1	7.25349	9.26444	10.4326	Il6	0.00433524	CCs
Hmgb1	7.25349	9.26444	10.4326	Lmna	0.00225278	CCs
Hmgb1	7.25349	9.26444	10.4326	Cdh5	0.00569041	CCs
Hmgb1	7.25349	9.26444	10.4326	Ahnak	0.00229718	CCs
Hmgb1	7.25349	9.26444	10.4326	Vcam1	0.00590283	CCs
Hmgb1	7.25349	9.26444	10.4326	Zfp36	0.0023799	CCs
Hmgb1	7.25349	9.26444	10.4326	Nfkbia	0.00352569	CCs
Hmgb1	7.25349	9.26444	10.4326	Icam1	0.00562017	CCs
Igf1	0.907474	0.674036	0.587017	Wfdc1	0.00680814	TM2
Igf1	0.907474	0.674036	0.587017	Lamc3	0.00687119	TM2
Igf1	0.907474	0.674036	0.587017	Cald1	0.00836395	TM2
Igf1	0.907474	0.674036	0.587017	Abi3bp	0.0065716	TM2
Il1a	0.00130109	0.002051	0.00394356	Cxcl10	0.00590308	TM2
Il1a	0.00130109	0.002051	0.00394356	Tnc	0.00251129	TM1
Il1a	0.00130109	0.002051	0.00394356	Icam1	0.00501124	TM1
Il1a	0.00130109	0.002051	0.00394356	Sptbn1	0.00269842	TM1
Il1a	0.00130109	0.002051	0.00394356	Fos	0.00376282	TM2
Il1a	0.00130109	0.002051	0.00394356	Ccl2	0.0025114	TM2
Il1a	0.00130109	0.002051	0.00394356	Mmp3	0.0067144	TM1
Il1a	0.00130109	0.002051	0.00394356	Vcam1	0.0053675	TM1
Il1a	0.00130109	0.002051	0.00394356	Sptbn1	0.00269842	TM2
Il1a	0.00130109	0.002051	0.00394356	Serpine1	0.0027707	TM1
Il1a	0.00130109	0.002051	0.00394356	Ptgs2	0.00509683	TM2
Il1a	0.00130109	0.002051	0.00394356	Icam1	0.00501124	TM2
Il1a	0.00130109	0.002051	0.00394356	Nfkbia	0.00457584	TM2
Il1a	0.00130109	0.002051	0.00394356	Ptgs2	0.00509683	TM1
Il1a	0.00130109	0.002051	0.00394356	Vegfa	0.00477675	TM2
Il1b	0.0131507	0.0196327	0.00518921	Traf1	0.00628597	CCs
Il1b	0.0131507	0.0196327	0.00518921	Cxcl10	0.00602509	TM2
Il1b	0.0131507	0.0196327	0.00518921	Eln	0.00695102	TM2
Il1b	0.0131507	0.0196327	0.00518921	Col8a1	0.00551198	TM2
Il1b	0.0131507	0.0196327	0.00518921	Timp2	0.00594601	TM2
Il1b	0.0131507	0.0196327	0.00518921	Col8a1	0.00551198	TM1
Il1b	0.0131507	0.0196327	0.00518921	Thbs4	0.00555154	TM1
Il1b	0.0131507	0.0196327	0.00518921	Ccl7	0.00856922	TM2
Il1b	0.0131507	0.0196327	0.00518921	Adamts4	0.00621244	CCs
Il1b	0.0131507	0.0196327	0.00518921	Sele	0.00649306	CCs
Il1b	0.0131507	0.0196327	0.00518921	Cxcl1	0.00562976	TM2
Il1b	0.0131507	0.0196327	0.00518921	Serpine1	0.0058254	TM1
Il1b	0.0131507	0.0196327	0.00518921	Adamts1	0.0061082	CCs
Il1b	0.0131507	0.0196327	0.00518921	Timp3	0.00642038	TM1
Il1b	0.0131507	0.0196327	0.00518921	Col11a1	0.00548441	TM1
Il1b	0.0131507	0.0196327	0.00518921	Bgn	0.00556725	TM2
Il1b	0.0131507	0.0196327	0.00518921	Scx	0.00769077	TM1
Il1b	0.0131507	0.0196327	0.00518921	Mmp3	0.00673912	TM1
Il1b	0.0131507	0.0196327	0.00518921	Col11a1	0.00548441	TM2
Il1b	0.0131507	0.0196327	0.00518921	Bgn	0.00556725	TM1
Il1b	0.0131507	0.0196327	0.00518921	Eln	0.00695102	TM1
Il1b	0.0131507	0.0196327	0.00518921	Timp2	0.00594601	TM1
Il1b	0.0131507	0.0196327	0.00518921	Pla2g4a	0.00679685	TM1
Il1b	0.0131507	0.0196327	0.00518921	Adamts1	0.0061082	TM2
Il1b	0.0131507	0.0196327	0.00518921	Vcam1	0.00561873	CCs
Il1b	0.0131507	0.0196327	0.00518921	Tnmd	0.00856631	TM1
Il1b	0.0131507	0.0196327	0.00518921	Vcam1	0.00561873	TM1
Il1b	0.0131507	0.0196327	0.00518921	Timp3	0.00642038	TM2
Il22	0.00104877	0	0	Pecam1	0.00260761	CCs
Il22	0.00104877	0	0	Zfp36	0.00281955	CCs
Il22	0.00104877	0	0	Ahnak	0.00237997	CCs
Il22	0.00104877	0	0	Lmna	0.00260346	CCs
Il22	0.00104877	0	0	Nfkbia	0.0023585	CCs
Il22	0.00104877	0	0	Vwf	0.00303359	CCs
Il22	0.00104877	0	0	Icam1	0.00340912	CCs
Il22	0.00104877	0	0	Il6	0.00482244	CCs
Il22	0.00104877	0	0	Atf3	0.00247498	CCs
Il24	0.00104232	0	0	Sptbn1	0.00212511	BECs
Il24	0.00104232	0	0	Efna1	0.00228798	BECs
Il24	0.00104232	0	0	Id3	0.00241229	BECs
Il24	0.00104232	0	0	Irf1	0.00288598	BECs
Il24	0.00104232	0	0	Atf3	0.0021823	BECs
Il24	0.00104232	0	0	Zfp36	0.00286367	BECs
Il24	0.00104232	0	0	Ier3	0.00243	BECs
Il24	0.00104232	0	0	Smad7	0.00233686	BECs
Il24	0.00104232	0	0	Hes1	0.00241779	BECs
Il24	0.00104232	0	0	Ubc	0.00241065	BECs
Il24	0.00104232	0	0	Rgs3	0.00228485	BECs
Il24	0.00104232	0	0	Mcl1	0.00217378	BECs
Il25	0.00654444	0	0	Nfkbia	0.00248813	SECs
Il25	0.00654444	0	0	Nfatc1	0.00261188	SECs
Il25	0.00654444	0	0	Plec	0.00225982	SECs
Il25	0.00654444	0	0	Maf	0.00275236	SECs
Il25	0.00654444	0	0	Cdkn1a	0.00254647	SECs
Il25	0.00654444	0	0	Serpine1	0.00249177	SECs
Il33	0.0397815	0.806298	0.0216122	Icam1	0.00219908	TM2
Il33	0.0397815	0.806298	0.0216122	Gadd45b	0.00119949	TM2
Il33	0.0397815	0.806298	0.0216122	Vegfa	0.00205278	TM2
Il33	0.0397815	0.806298	0.0216122	Myd88	0.00218394	TM2
Il33	0.0397815	0.806298	0.0216122	Nfkbia	0.00123764	TM2
Il33	0.0397815	0.806298	0.0216122	Zfp36l1	0.00108932	TM2
Il33	0.0397815	0.806298	0.0216122	Cebpb	0.00108014	TM2
Il33	0.0397815	0.806298	0.0216122	Id2	0.00112265	TM2
Il33	0.0397815	0.806298	0.0216122	Fos	0.00207855	TM2
Il33	0.0397815	0.806298	0.0216122	Ctsk	0.0021156	TM2
Il33	0.0397815	0.806298	0.0216122	Egr1	0.00113747	TM2
Il33	0.0397815	0.806298	0.0216122	Junb	0.00123018	TM2
Il33	0.0397815	0.806298	0.0216122	Id3	0.00129374	TM2
Il33	0.0397815	0.806298	0.0216122	Irf1	0.00120777	TM2
Il6	0.140161	0.316012	0.0795136	Spp1	0.00409611	TM3
Il6	0.140161	0.316012	0.0795136	Socs3	0.00604523	TM3
Il6	0.140161	0.316012	0.0795136	Icam1	0.0052789	TM3
Il6	0.140161	0.316012	0.0795136	Irf1	0.00647601	TM3
Il6	0.140161	0.316012	0.0795136	Junb	0.00297935	TM3
Il6	0.140161	0.316012	0.0795136	Map1lc3a	0.00557576	TM3
Il6	0.140161	0.316012	0.0795136	Ar	0.00481707	TM3
Inhba	0.278215	0.0675205	0.0118795	Nos3	0.00171334	BECs
Inhba	0.278215	0.0675205	0.0118795	Bmpr2	0.00177585	BECs
Inhba	0.278215	0.0675205	0.0118795	Cdkn1a	0.00253067	SECs
Inhba	0.278215	0.0675205	0.0118795	Hes1	0.00206027	BECs
Inhba	0.278215	0.0675205	0.0118795	Atf3	0.00175942	SECs
Inhba	0.278215	0.0675205	0.0118795	Ets1	0.00195093	BECs
Inhba	0.278215	0.0675205	0.0118795	Lef1	0.00170311	BECs
Inhba	0.278215	0.0675205	0.0118795	Smad7	0.00291435	BECs
Inhba	0.278215	0.0675205	0.0118795	Atf3	0.00175942	BECs
Inhba	0.278215	0.0675205	0.0118795	Edn1	0.00185028	BECs
Inhba	0.278215	0.0675205	0.0118795	Slc2a1	0.00169464	BECs
Inhba	0.278215	0.0675205	0.0118795	Tgfbr2	0.00176152	SECs
Inhba	0.278215	0.0675205	0.0118795	Id3	0.00240448	BECs
Inhba	0.278215	0.0675205	0.0118795	Mecom	0.00173801	BECs
Inhba	0.278215	0.0675205	0.0118795	Smad6	0.00245672	BECs
Inhba	0.278215	0.0675205	0.0118795	Ier3	0.00184805	BECs
Inhba	0.278215	0.0675205	0.0118795	Sptbn1	0.00189794	BECs
Inhba	0.278215	0.0675205	0.0118795	Nos3	0.00171334	SECs
Inhba	0.278215	0.0675205	0.0118795	Serpine1	0.00495713	SECs
Inhba	0.278215	0.0675205	0.0118795	Sox17	0.00571523	SECs
Inhba	0.278215	0.0675205	0.0118795	Ets1	0.00195093	SECs
Inhba	0.278215	0.0675205	0.0118795	Sox17	0.00571523	BECs
Inhba	0.278215	0.0675205	0.0118795	Lmna	0.0017184	SECs
Inhba	0.278215	0.0675205	0.0118795	Nedd9	0.00168937	SECs
Inhba	0.278215	0.0675205	0.0118795	Sptbn1	0.00189794	SECs
Inhba	0.278215	0.0675205	0.0118795	Zfp36	0.00180051	BECs
Inhba	0.278215	0.0675205	0.0118795	Plec	0.0019195	SECs
Inhba	0.278215	0.0675205	0.0118795	Ubc	0.00208328	BECs
Ins2	0	0	0	Gm1673	0.0166045	TM3
Ins2	0	0	0	Selenop	0.0117484	TM2
Ins2	0	0	0	Tceal9	0.0165761	TM3
Ins2	0	0	0	Adgra2	0.0181076	TM3
Ins2	0	0	0	Tceal9	0.0165761	TM2
Ins2	0	0	0	Gm1673	0.0166045	TM1
Ins2	0	0	0	Plpp3	0.0116801	TM2
Ins2	0	0	0	Tceal9	0.0165761	TM1
Ins2	0	0	0	Igsf10	0.00715244	TM1
Ins2	0	0	0	Plpp3	0.0116801	TM3
Ins2	0	0	0	Selenok	0.0251761	TM1
Ins2	0	0	0	Plpp3	0.0116801	TM1
Itgam	0.00637188	0.00704829	0	Cdkn1a	0.0016634	SECs
Itgam	0.00637188	0.00704829	0	Ccnd2	0.00112227	TM1
Itgam	0.00637188	0.00704829	0	Id3	0.00126057	TM1
Itgam	0.00637188	0.00704829	0	Junb	0.00137197	TM2
Itgam	0.00637188	0.00704829	0	Gsn	0.00113532	TM2
Itgam	0.00637188	0.00704829	0	Gsn	0.00113532	TM1
Itgam	0.00637188	0.00704829	0	Gadd45b	0.00142863	TM1
Itgam	0.00637188	0.00704829	0	Cebpb	0.00129517	TM2
Itgam	0.00637188	0.00704829	0	Lmna	0.00125403	TM1
Itgam	0.00637188	0.00704829	0	Fn1	0.00112892	TM1
Itgam	0.00637188	0.00704829	0	Id3	0.00126057	TM2
Itgam	0.00637188	0.00704829	0	Icam1	0.00124723	CCs
Itgam	0.00637188	0.00704829	0	Id2	0.00117513	TM1
Itgam	0.00637188	0.00704829	0	Ptgs2	0.00384849	TM2
Itgam	0.00637188	0.00704829	0	Id2	0.00117513	TM2
Itgam	0.00637188	0.00704829	0	Fos	0.00127541	TM2
Itgam	0.00637188	0.00704829	0	Irf1	0.00117811	TM2
Itgam	0.00637188	0.00704829	0	Ets1	0.00121909	SECs
Itgam	0.00637188	0.00704829	0	Atf3	0.00118657	SECs
Itgam	0.00637188	0.00704829	0	Il6	0.00124938	CCs
Itgam	0.00637188	0.00704829	0	Nfkbia	0.00131078	TM2
Itgam	0.00637188	0.00704829	0	Brd2	0.00112612	TM2
Itgam	0.00637188	0.00704829	0	Icam1	0.00124723	TM2
Itgam	0.00637188	0.00704829	0	Icam1	0.00124723	TM1
Itgam	0.00637188	0.00704829	0	Ets1	0.00121909	CCs
Itgam	0.00637188	0.00704829	0	Vegfa	0.00146695	TM2
Itgam	0.00637188	0.00704829	0	Gadd45b	0.00142863	TM2
Itgam	0.00637188	0.00704829	0	Edn1	0.00122714	CCs
Itgam	0.00637188	0.00704829	0	Sele	0.00228925	SECs
Itgam	0.00637188	0.00704829	0	Zfp36	0.00127095	CCs
Itgam	0.00637188	0.00704829	0	Vcam1	0.00210891	CCs
Itgam	0.00637188	0.00704829	0	Hes1	0.00133406	TM1
Itgam	0.00637188	0.00704829	0	Ahnak	0.00129404	CCs
Itgam	0.00637188	0.00704829	0	Lmna	0.00125403	CCs
Itgam	0.00637188	0.00704829	0	Nos3	0.00118937	CCs
Itgam	0.00637188	0.00704829	0	Mcl1	0.00112067	CCs
Itgam	0.00637188	0.00704829	0	Atf3	0.00118657	CCs
Itgam	0.00637188	0.00704829	0	Nfkbia	0.00131078	CCs
Itgam	0.00637188	0.00704829	0	Ptgs2	0.00384849	TM1
Itgam	0.00637188	0.00704829	0	Nfkbia	0.00131078	SECs
Itgam	0.00637188	0.00704829	0	Runx1	0.00117181	TM1
Itgam	0.00637188	0.00704829	0	Sele	0.00228925	CCs
Itgam	0.00637188	0.00704829	0	Vcam1	0.00210891	TM1
Itgam	0.00637188	0.00704829	0	Serpine1	0.00129362	SECs
Itgam	0.00637188	0.00704829	0	Serpine1	0.00129362	TM1
Itgam	0.00637188	0.00704829	0	Nos3	0.00118937	SECs
Itgam	0.00637188	0.00704829	0	Plec	0.00135048	SECs
Itgam	0.00637188	0.00704829	0	Lmna	0.00125403	SECs
Itgam	0.00637188	0.00704829	0	Zfp36l1	0.00122885	TM2
Itgb7	0.0110409	0.000988111	0.0192789	Cdkn1a	0.00149768	SECs
Itgb7	0.0110409	0.000988111	0.0192789	Nfkbia	0.00111256	TM2
Itgb7	0.0110409	0.000988111	0.0192789	Tgfbr2	0.00108623	SECs
Itgb7	0.0110409	0.000988111	0.0192789	Junb	0.00120963	TM2
Itgb7	0.0110409	0.000988111	0.0192789	Id3	0.00126249	TM2
Itgb7	0.0110409	0.000988111	0.0192789	Pdgfra	0.00108838	TM2
Itgb7	0.0110409	0.000988111	0.0192789	Plec	0.00118126	SECs
Itgb7	0.0110409	0.000988111	0.0192789	Serpine1	0.00109496	SECs
Itgb7	0.0110409	0.000988111	0.0192789	Id2	0.00110091	TM2
Itgb7	0.0110409	0.000988111	0.0192789	Ar	0.00101316	TM2
Itgb7	0.0110409	0.000988111	0.0192789	Cebpb	0.00112192	TM2
Itgb7	0.0110409	0.000988111	0.0192789	Bcr	0.000995749	SECs
Itgb7	0.0110409	0.000988111	0.0192789	Ets1	0.00109543	SECs
Itgb7	0.0110409	0.000988111	0.0192789	Gsn	0.00100744	TM2
Itgb7	0.0110409	0.000988111	0.0192789	Cyp1b1	0.00107761	TM2
Itgb7	0.0110409	0.000988111	0.0192789	Atf3	0.00119099	SECs
Itgb7	0.0110409	0.000988111	0.0192789	Zfp36l1	0.00102533	TM2
Itgb7	0.0110409	0.000988111	0.0192789	Gadd45b	0.00115165	TM2
Itgb7	0.0110409	0.000988111	0.0192789	Nfkbia	0.00111256	SECs
Itgb7	0.0110409	0.000988111	0.0192789	Vegfa	0.0012141	TM2
Itgb7	0.0110409	0.000988111	0.0192789	Lmna	0.00112436	SECs
Itgb7	0.0110409	0.000988111	0.0192789	Fos	0.00106368	TM2
Jag1	0.312211	0.70624	0.191246	Hes1	0.00703442	BECs
Jag1	0.312211	0.70624	0.191246	Fam13c	0.0060214	BECs
Lta	0	0	0	Icam1	0.0028862	CCs
Lta	0	0	0	Ets1	0.00153383	CCs
Lta	0	0	0	Ahnak	0.00154115	CCs
Lta	0	0	0	Nfkbia	0.00209614	CCs
Lta	0	0	0	Lmna	0.00169361	CCs
Lta	0	0	0	Vcam1	0.00255758	CCs
Lta	0	0	0	Il6	0.00231669	CCs
Lta	0	0	0	Zfp36	0.00183645	CCs
Npnt	0.259957	0.027678	0.0853552	Nrp2	0.00209512	TM3
Npnt	0.259957	0.027678	0.0853552	Igfbp5	0.00183768	TM3
Npnt	0.259957	0.027678	0.0853552	Pcdh7	0.00204071	TM3
Npnt	0.259957	0.027678	0.0853552	Lum	0.00200829	TM3
Npnt	0.259957	0.027678	0.0853552	Alx4	0.00276777	TM3
Npnt	0.259957	0.027678	0.0853552	Ctsk	0.00194616	TM3
Npnt	0.259957	0.027678	0.0853552	Lmx1b	0.00250477	TM3
Npnt	0.259957	0.027678	0.0853552	Adamts4	0.00193969	TM3
Npnt	0.259957	0.027678	0.0853552	Scube1	0.00246985	TM3
Npnt	0.259957	0.027678	0.0853552	Prkg1	0.00197936	TM3
Nrg2	0.0306785	0.0712471	0.20878	Ptgs2	0.00100151	TM2
Nrg2	0.0306785	0.0712471	0.20878	Vegfa	0.00120445	TM2
Nrg2	0.0306785	0.0712471	0.20878	Junb	0.00111338	TM2
Nrg2	0.0306785	0.0712471	0.20878	Gsn	0.00100248	TM2
Nrg2	0.0306785	0.0712471	0.20878	Gadd45b	0.0010971	TM2
Nrg2	0.0306785	0.0712471	0.20878	Fos	0.0011608	TM2
Nrg2	0.0306785	0.0712471	0.20878	Zfp36l1	0.00102655	TM2
Nrg2	0.0306785	0.0712471	0.20878	Nfkbia	0.00102602	TM2
Nrg2	0.0306785	0.0712471	0.20878	Klf9	0.000988509	TM2
Nrg2	0.0306785	0.0712471	0.20878	Irf1	0.00112307	TM2
Nrg2	0.0306785	0.0712471	0.20878	Egr1	0.00100982	TM2
Nrg2	0.0306785	0.0712471	0.20878	Cebpb	0.000979027	TM2
Nrg2	0.0306785	0.0712471	0.20878	Id2	0.00115472	TM2
Nrg2	0.0306785	0.0712471	0.20878	Id3	0.00113688	TM2
Nrg2	0.0306785	0.0712471	0.20878	Cyp1b1	0.0010205	TM2
Nrg2	0.0306785	0.0712471	0.20878	Icam1	0.00108785	TM2
Nrg4	0	0.00485565	0	Zfp36l1	0.000962126	TM2
Nrg4	0	0.00485565	0	Id2	0.00112586	TM2
Nrg4	0	0.00485565	0	Ier2	0.000915921	TM2
Nrg4	0	0.00485565	0	Cyp1b1	0.000996835	TM2
Nrg4	0	0.00485565	0	Cebpb	0.000966587	TM2
Nrg4	0	0.00485565	0	Id3	0.00113216	TM2
Nrg4	0	0.00485565	0	Junb	0.00112406	TM2
Nrg4	0	0.00485565	0	Vegfa	0.00112181	TM2
Nrg4	0	0.00485565	0	Egr1	0.00101129	TM2
Nrg4	0	0.00485565	0	Brd2	0.000921232	TM2
Nrg4	0	0.00485565	0	Irf1	0.00112345	TM2
Nrg4	0	0.00485565	0	Gadd45b	0.00103154	TM2
Nrg4	0	0.00485565	0	Nfkbia	0.00101139	TM2
Nrg4	0	0.00485565	0	Icam1	0.00107615	TM2
Nrg4	0	0.00485565	0	Gsn	0.000986373	TM2
Nrg4	0	0.00485565	0	Ptgs2	0.00097695	TM2
Nrg4	0	0.00485565	0	Fos	0.00120046	TM2
Nrg4	0	0.00485565	0	Klf9	0.000940535	TM2
Nrtn	0.0245422	0.0299587	0.064962	Ccnd2	0.00132406	TM3
Nrtn	0.0245422	0.0299587	0.064962	Ptma	0.0012127	TM3
Nrtn	0.0245422	0.0299587	0.064962	Socs3	0.00117937	TM3
Nrtn	0.0245422	0.0299587	0.064962	Irf1	0.00131156	TM3
Nrtn	0.0245422	0.0299587	0.064962	Junb	0.00120634	TM3
Nrtn	0.0245422	0.0299587	0.064962	Klf9	0.00107886	TM3
Nrtn	0.0245422	0.0299587	0.064962	Id3	0.00126934	TM3
Nrtn	0.0245422	0.0299587	0.064962	Fos	0.00137141	TM3
Nrtn	0.0245422	0.0299587	0.064962	Ccnd3	0.00134865	TM3
Nrtn	0.0245422	0.0299587	0.064962	Cited2	0.00108439	TM3
Nrtn	0.0245422	0.0299587	0.064962	Egr1	0.0011856	TM3
Nrtn	0.0245422	0.0299587	0.064962	Gadd45b	0.00118851	TM3
Nrtn	0.0245422	0.0299587	0.064962	Icam1	0.00118096	TM3
Ocln	0.0022206	0.00378533	0.00289429	Id3	0.00143091	BECs
Ocln	0.0022206	0.00378533	0.00289429	Zfp36	0.00143129	BECs
Ocln	0.0022206	0.00378533	0.00289429	Ubc	0.00128819	BECs
Ocln	0.0022206	0.00378533	0.00289429	Rgs3	0.00122923	SECs
Ocln	0.0022206	0.00378533	0.00289429	Maf	0.0012171	SECs
Ocln	0.0022206	0.00378533	0.00289429	Serpine1	0.00136079	TM1
Ocln	0.0022206	0.00378533	0.00289429	Hes1	0.00134851	BECs
Ocln	0.0022206	0.00378533	0.00289429	Sptbn1	0.00114848	SECs
Ocln	0.0022206	0.00378533	0.00289429	Lmna	0.00132419	SECs
Ocln	0.0022206	0.00378533	0.00289429	Prox1	0.00112721	SECs
Ocln	0.0022206	0.00378533	0.00289429	Serpine1	0.00136079	SECs
Ocln	0.0022206	0.00378533	0.00289429	Sptbn1	0.00114848	BECs
Ocln	0.0022206	0.00378533	0.00289429	Pitx2	0.00123577	TM1
Ocln	0.0022206	0.00378533	0.00289429	Zfp36l2	0.00118223	TM1
Ocln	0.0022206	0.00378533	0.00289429	Plec	0.00124422	SECs
Ocln	0.0022206	0.00378533	0.00289429	Tgfbr2	0.00116898	SECs
Ocln	0.0022206	0.00378533	0.00289429	Lmna	0.00132419	TM1
Ocln	0.0022206	0.00378533	0.00289429	Id2	0.0013448	TM1
Ocln	0.0022206	0.00378533	0.00289429	Id3	0.00143091	TM1
Ocln	0.0022206	0.00378533	0.00289429	Atf3	0.00123649	SECs
Ocln	0.0022206	0.00378533	0.00289429	Dlc1	0.00115767	BECs
Ocln	0.0022206	0.00378533	0.00289429	Zfhx3	0.00122085	TM1
Ocln	0.0022206	0.00378533	0.00289429	Rgs3	0.00122923	BECs
Ocln	0.0022206	0.00378533	0.00289429	Atf3	0.00123649	BECs
Ocln	0.0022206	0.00378533	0.00289429	Ets1	0.00132043	BECs
Ocln	0.0022206	0.00378533	0.00289429	Edn1	0.00124353	BECs
Ocln	0.0022206	0.00378533	0.00289429	Fn1	0.00115566	TM1
Ocln	0.0022206	0.00378533	0.00289429	Smad7	0.00144154	BECs
Ocln	0.0022206	0.00378533	0.00289429	Smad6	0.001293	BECs
Ocln	0.0022206	0.00378533	0.00289429	Ets1	0.00132043	SECs
Ocln	0.0022206	0.00378533	0.00289429	Ier3	0.00118519	BECs
Ocln	0.0022206	0.00378533	0.00289429	Sptbn1	0.00114848	TM1
Ocln	0.0022206	0.00378533	0.00289429	Bcr	0.00116836	SECs
Ocln	0.0022206	0.00378533	0.00289429	Tgfbr2	0.00116898	TM1
Ocln	0.0022206	0.00378533	0.00289429	Hes1	0.00134851	TM1
Ocln	0.0022206	0.00378533	0.00289429	Cdkn1a	0.00160815	SECs
Ocln	0.0022206	0.00378533	0.00289429	Gadd45b	0.00132305	TM1
Oit1	0.00780977	0.0162436	0.00100603	Ptma	0.000975496	TM3
Oit1	0.00780977	0.0162436	0.00100603	Rab34	0.000844723	TM3
Oit1	0.00780977	0.0162436	0.00100603	Junb	0.00099525	TM3
Oit1	0.00780977	0.0162436	0.00100603	Fos	0.000883162	TM3
Oit1	0.00780977	0.0162436	0.00100603	Gadd45b	0.000977109	TM3
Oit1	0.00780977	0.0162436	0.00100603	Id3	0.000984313	TM3
Oit1	0.00780977	0.0162436	0.00100603	Socs3	0.000861762	TM3
Oit1	0.00780977	0.0162436	0.00100603	Nr2f2	0.000887092	TM3
Oit1	0.00780977	0.0162436	0.00100603	Nr4a1	0.00169418	TM3
Oit1	0.00780977	0.0162436	0.00100603	Ccnd2	0.00082618	TM3
Oit1	0.00780977	0.0162436	0.00100603	Cited2	0.00083717	TM3
Oit1	0.00780977	0.0162436	0.00100603	Zfp36l2	0.000866506	TM3
Osm	0.00181398	0	0	Atf3	0.00206462	CCs
Osm	0.00181398	0	0	Adamts4	0.00645638	CCs
Osm	0.00181398	0	0	Il6st	0.00266825	CCs
Osm	0.00181398	0	0	Cxcl12	0.00260714	CCs
Osm	0.00181398	0	0	Zfp36	0.0023459	CCs
Osm	0.00181398	0	0	Vim	0.00275862	CCs
Osm	0.00181398	0	0	Lmna	0.00205117	CCs
Osm	0.00181398	0	0	Il6	0.00460162	CCs
Osm	0.00181398	0	0	Adamts9	0.00289122	CCs
Osm	0.00181398	0	0	Sele	0.00235257	CCs
Osm	0.00181398	0	0	Edn1	0.00277806	CCs
Osm	0.00181398	0	0	Pecam1	0.00258914	CCs
Osm	0.00181398	0	0	Icam1	0.00200404	CCs
Osm	0.00181398	0	0	Nrp2	0.00280749	CCs
Pecam1	0.016151	0.0139943	0.0201884	Mcl1	0.00123272	CCs
Pecam1	0.016151	0.0139943	0.0201884	Myh9	0.00122331	CCs
Pecam1	0.016151	0.0139943	0.0201884	Atf3	0.00125921	CCs
Pecam1	0.016151	0.0139943	0.0201884	Edn1	0.00130198	CCs
Pecam1	0.016151	0.0139943	0.0201884	Lmna	0.00133914	CCs
Pecam1	0.016151	0.0139943	0.0201884	Icam1	0.00127682	CCs
Pecam1	0.016151	0.0139943	0.0201884	Zfp36	0.00136275	CCs
Pecam1	0.016151	0.0139943	0.0201884	Rcan1	0.00208058	CCs
Pecam1	0.016151	0.0139943	0.0201884	Ahnak	0.00136739	CCs
Pecam1	0.016151	0.0139943	0.0201884	Nos3	0.00138365	CCs
Pecam1	0.016151	0.0139943	0.0201884	Sele	0.00230324	CCs
Pik3cb	0.0286374	0.0544765	0.0319366	Egr1	0.00112683	TM3
Pik3cb	0.0286374	0.0544765	0.0319366	Nr2f2	0.00101159	TM3
Pik3cb	0.0286374	0.0544765	0.0319366	Klf9	0.00107666	TM3
Pik3cb	0.0286374	0.0544765	0.0319366	Junb	0.00122592	TM2
Pik3cb	0.0286374	0.0544765	0.0319366	Cxcl10	0.00191557	TM3
Pik3cb	0.0286374	0.0544765	0.0319366	Fos	0.00209263	TM3
Pik3cb	0.0286374	0.0544765	0.0319366	Cyp1b1	0.00108163	TM2
Pik3cb	0.0286374	0.0544765	0.0319366	Cited2	0.0010172	TM3
Pik3cb	0.0286374	0.0544765	0.0319366	Ccnd2	0.00117062	TM3
Pik3cb	0.0286374	0.0544765	0.0319366	Junb	0.00122592	TM3
Pik3cb	0.0286374	0.0544765	0.0319366	Icam1	0.00119579	TM3
Pik3cb	0.0286374	0.0544765	0.0319366	Klf9	0.00107666	TM2
Pik3cb	0.0286374	0.0544765	0.0319366	Nfkbia	0.00108893	TM2
Pik3cb	0.0286374	0.0544765	0.0319366	Brd2	0.00104589	TM2
Pik3cb	0.0286374	0.0544765	0.0319366	Irf1	0.00136769	TM2
Pik3cb	0.0286374	0.0544765	0.0319366	Cebpb	0.00108106	TM2
Pik3cb	0.0286374	0.0544765	0.0319366	Gadd45b	0.00120316	TM3
Pik3cb	0.0286374	0.0544765	0.0319366	Ccnd3	0.00117925	TM3
Pik3cb	0.0286374	0.0544765	0.0319366	Fos	0.00209263	TM2
Pik3cb	0.0286374	0.0544765	0.0319366	Gadd45b	0.00120316	TM2
Pik3cb	0.0286374	0.0544765	0.0319366	Cxcl10	0.00191557	TM2
Pik3cb	0.0286374	0.0544765	0.0319366	Egr1	0.00112683	TM2
Pik3cb	0.0286374	0.0544765	0.0319366	Irf1	0.00136769	TM3
Pik3cb	0.0286374	0.0544765	0.0319366	Id3	0.0012383	TM2
Pik3cb	0.0286374	0.0544765	0.0319366	Ptma	0.00128384	TM3
Pik3cb	0.0286374	0.0544765	0.0319366	Socs3	0.00122256	TM3
Pik3cb	0.0286374	0.0544765	0.0319366	Tagln	0.00212177	TM3
Pik3cb	0.0286374	0.0544765	0.0319366	Id2	0.00112257	TM2
Pik3cb	0.0286374	0.0544765	0.0319366	Id3	0.0012383	TM3
Pik3cb	0.0286374	0.0544765	0.0319366	Zfp36l1	0.0010769	TM2
Pik3cb	0.0286374	0.0544765	0.0319366	Vegfa	0.0013084	TM2
Pik3cb	0.0286374	0.0544765	0.0319366	Icam1	0.00119579	TM2
Pomc	0.0139732	0.0406428	0.0505442	Lmna	0.00124475	TM1
Pomc	0.0139732	0.0406428	0.0505442	Ptgs2	0.00377036	TM1
Pomc	0.0139732	0.0406428	0.0505442	Hes1	0.00130832	TM1
Pomc	0.0139732	0.0406428	0.0505442	Mmp2	0.00193876	TM1
Pomc	0.0139732	0.0406428	0.0505442	Icam1	0.00458503	TM1
Pomc	0.0139732	0.0406428	0.0505442	Col1a1	0.0038874	TM1
Pomc	0.0139732	0.0406428	0.0505442	Id3	0.00121374	TM1
Pomc	0.0139732	0.0406428	0.0505442	Gadd45b	0.00139087	TM1
Pomc	0.0139732	0.0406428	0.0505442	Timp1	0.00364027	TM1
Pomc	0.0139732	0.0406428	0.0505442	Igf2	0.00232662	TM1
Pomc	0.0139732	0.0406428	0.0505442	Serpine1	0.00139895	TM1
Pomc	0.0139732	0.0406428	0.0505442	Vcam1	0.00512868	TM1
Pomc	0.0139732	0.0406428	0.0505442	Timp2	0.0041872	TM1
Pomc	0.0139732	0.0406428	0.0505442	Acta2	0.00386404	TM1
Pspn	0.0152704	0.00296031	0	Irf1	0.00129679	TM3
Pspn	0.0152704	0.00296031	0	Socs3	0.00116573	TM3
Pspn	0.0152704	0.00296031	0	Junb	0.00119187	TM3
Pspn	0.0152704	0.00296031	0	Klf9	0.00107272	TM3
Pspn	0.0152704	0.00296031	0	Id3	0.0012707	TM3
Pspn	0.0152704	0.00296031	0	Ccnd2	0.00130836	TM3
Pspn	0.0152704	0.00296031	0	Ccnd3	0.00139996	TM3
Pspn	0.0152704	0.00296031	0	Cited2	0.00106773	TM3
Pspn	0.0152704	0.00296031	0	Ptma	0.00118398	TM3
Pspn	0.0152704	0.00296031	0	Fos	0.00139981	TM3
Pspn	0.0152704	0.00296031	0	Icam1	0.00110813	TM3
Pspn	0.0152704	0.00296031	0	Gadd45b	0.0011845	TM3
Pspn	0.0152704	0.00296031	0	Egr1	0.00118219	TM3
Sele	0.00225219	0.0153669	0.00578567	Ccnd2	0.00149717	TM3
Sele	0.00225219	0.0153669	0.00578567	Fos	0.00169579	TM3
Sele	0.00225219	0.0153669	0.00578567	Gadd45b	0.00199901	TM3
Sele	0.00225219	0.0153669	0.00578567	Icam1	0.00258939	TM3
Sele	0.00225219	0.0153669	0.00578567	Egr1	0.0014908	TM3
Sele	0.00225219	0.0153669	0.00578567	Irf1	0.00161233	TM3
Sele	0.00225219	0.0153669	0.00578567	Itgb1	0.00246466	TM3
Sele	0.00225219	0.0153669	0.00578567	Junb	0.00180216	TM3
Sele	0.00225219	0.0153669	0.00578567	Id3	0.00178028	TM3
Sele	0.00225219	0.0153669	0.00578567	Ptma	0.00180962	TM3
Sele	0.00225219	0.0153669	0.00578567	Nr2f2	0.00157822	TM3
Selplg	0.00729954	0.0115612	0.0135165	Nfkbia	0.00100815	SECs
Selplg	0.00729954	0.0115612	0.0135165	Selp	0.00261856	CCs
Selplg	0.00729954	0.0115612	0.0135165	Timp2	0.00219002	SECs
Selplg	0.00729954	0.0115612	0.0135165	Ets1	0.000956833	SECs
Selplg	0.00729954	0.0115612	0.0135165	Edn1	0.00102603	CCs
Selplg	0.00729954	0.0115612	0.0135165	Nfkbia	0.00100815	CCs
Selplg	0.00729954	0.0115612	0.0135165	Selp	0.00261856	SECs
Selplg	0.00729954	0.0115612	0.0135165	Il6	0.00168988	CCs
Selplg	0.00729954	0.0115612	0.0135165	Lmna	0.00101333	SECs
Selplg	0.00729954	0.0115612	0.0135165	Lmna	0.00101333	CCs
Selplg	0.00729954	0.0115612	0.0135165	Plec	0.00110895	SECs
Selplg	0.00729954	0.0115612	0.0135165	Atf3	0.00231877	CCs
Selplg	0.00729954	0.0115612	0.0135165	Atf3	0.00231877	SECs
Selplg	0.00729954	0.0115612	0.0135165	Cdkn1a	0.00133042	SECs
Selplg	0.00729954	0.0115612	0.0135165	Icam1	0.00115589	CCs
Selplg	0.00729954	0.0115612	0.0135165	Ets1	0.000956833	CCs
Selplg	0.00729954	0.0115612	0.0135165	Serpine1	0.00102602	SECs
Selplg	0.00729954	0.0115612	0.0135165	Ahnak	0.000992736	CCs
Selplg	0.00729954	0.0115612	0.0135165	Zfp36	0.0009692	CCs
Sema3a	0.208118	0.0488411	0	Ets1	0.0012923	BECs
Sema3a	0.208118	0.0488411	0	Hes1	0.00132835	BECs
Sema3a	0.208118	0.0488411	0	Fli1	0.0012715	BECs
Sema3a	0.208118	0.0488411	0	Nos3	0.00131447	BECs
Sema3a	0.208118	0.0488411	0	Id3	0.00138209	BECs
Sema3a	0.208118	0.0488411	0	Slc2a1	0.0012731	BECs
Sema3a	0.208118	0.0488411	0	Smad7	0.00131411	BECs
Sema3a	0.208118	0.0488411	0	Sgk1	0.00122492	BECs
Sema3a	0.208118	0.0488411	0	Egr1	0.0012853	BECs
Sema3a	0.208118	0.0488411	0	Ubc	0.00151483	BECs
Sema3a	0.208118	0.0488411	0	Atf3	0.00131228	BECs
Sema3a	0.208118	0.0488411	0	Pdgfb	0.00128747	BECs
Sema3a	0.208118	0.0488411	0	Rgs3	0.00122099	BECs
Sema3a	0.208118	0.0488411	0	Ramp2	0.00124795	BECs
Sema3a	0.208118	0.0488411	0	Ier3	0.00148047	BECs
Sfrp2	7.92142	0.14895	0.141839	Tcf4	0.00207072	TM3
Sfrp2	7.92142	0.14895	0.141839	Tcf4	0.00207072	TM1
Sfrp2	7.92142	0.14895	0.141839	Hes1	0.00173022	TM1
Sfrp2	7.92142	0.14895	0.141839	Pitx2	0.00182972	TM2
Sfrp2	7.92142	0.14895	0.141839	Tcf4	0.00207072	TM2
Sfrp2	7.92142	0.14895	0.141839	Vegfa	0.00171413	TM2
Sfrp2	7.92142	0.14895	0.141839	Id3	0.00183794	TM2
Sfrp2	7.92142	0.14895	0.141839	Id2	0.00202632	TM1
Sfrp2	7.92142	0.14895	0.141839	Nfib	0.00184385	TM1
Sfrp2	7.92142	0.14895	0.141839	Pitx2	0.00182972	TM1
Sfrp2	7.92142	0.14895	0.141839	Nrp2	0.00171728	TM2
Sfrp2	7.92142	0.14895	0.141839	Id3	0.00183794	TM1
Sfrp2	7.92142	0.14895	0.141839	Flrt1	0.00217151	TM3
Sfrp2	7.92142	0.14895	0.141839	Id2	0.00202632	TM2
Sfrp2	7.92142	0.14895	0.141839	Nrp2	0.00171728	TM3
Sfrp2	7.92142	0.14895	0.141839	Runx1	0.00169176	TM1
Sfrp2	7.92142	0.14895	0.141839	Pitx2	0.00182972	TM3
Sfrp2	7.92142	0.14895	0.141839	Id3	0.00183794	TM3
Sfrp2	7.92142	0.14895	0.141839	Nr2f2	0.00170562	TM3
Spp1	2.90836	13.7153	2.61643	Timp1	0.00377515	TM1
Spp1	2.90836	13.7153	2.61643	Eln	0.0049989	TM3
Spp1	2.90836	13.7153	2.61643	Hes1	0.0015061	TM1
Spp1	2.90836	13.7153	2.61643	Gadd45b	0.00160524	TM1
Spp1	2.90836	13.7153	2.61643	Adamts2	0.00507234	TM1
Spp1	2.90836	13.7153	2.61643	Tnc	0.00447159	TM1
Spp1	2.90836	13.7153	2.61643	Icam1	0.00227822	TM1
Spp1	2.90836	13.7153	2.61643	Gadd45b	0.00160524	TM3
Spp1	2.90836	13.7153	2.61643	Id3	0.00142674	TM1
Spp1	2.90836	13.7153	2.61643	Thbs1	0.00424683	TM1
Spp1	2.90836	13.7153	2.61643	Cxcl10	0.00416649	TM3
Spp1	2.90836	13.7153	2.61643	Junb	0.00156926	TM3
Spp1	2.90836	13.7153	2.61643	Eln	0.0049989	TM1
Spp1	2.90836	13.7153	2.61643	Col3a1	0.0049588	TM1
Spp1	2.90836	13.7153	2.61643	Lmna	0.00144213	TM1
Spp1	2.90836	13.7153	2.61643	Id3	0.00142674	TM3
Spp1	2.90836	13.7153	2.61643	Icam1	0.00227822	TM3
Spp1	2.90836	13.7153	2.61643	Col3a1	0.0049588	TM3
Spp1	2.90836	13.7153	2.61643	Serpine1	0.00152724	TM1
Spp1	2.90836	13.7153	2.61643	Ptma	0.0016252	TM3
Spp1	2.90836	13.7153	2.61643	Col1a2	0.00421525	TM1
Spp1	2.90836	13.7153	2.61643	Col1a2	0.00421525	TM3
Tgfa	0.0222269	0.0387902	0.00959825	Id2	0.00139679	TM2
Tgfa	0.0222269	0.0387902	0.00959825	Vegfa	0.00456758	TM2
Tgfa	0.0222269	0.0387902	0.00959825	Irf1	0.00156799	TM2
Tgfa	0.0222269	0.0387902	0.00959825	Id3	0.00159329	TM2
Tgfa	0.0222269	0.0387902	0.00959825	Egr1	0.00143631	TM2
Tgfa	0.0222269	0.0387902	0.00959825	Ier2	0.00148637	TM2
Tgfa	0.0222269	0.0387902	0.00959825	Vim	0.00234872	TM2
Tgfa	0.0222269	0.0387902	0.00959825	Fos	0.00443744	TM2
Tgfa	0.0222269	0.0387902	0.00959825	Cxcl10	0.00424776	TM2
Tgfa	0.0222269	0.0387902	0.00959825	Serpinf1	0.00433264	TM2
Tgfa	0.0222269	0.0387902	0.00959825	Brd2	0.00139968	TM2
Tgfa	0.0222269	0.0387902	0.00959825	Zfp36l1	0.00144481	TM2
Tgfa	0.0222269	0.0387902	0.00959825	Cebpb	0.00447746	TM2
Tgfa	0.0222269	0.0387902	0.00959825	Gadd45b	0.00165329	TM2
Tgfa	0.0222269	0.0387902	0.00959825	Mdk	0.00437329	TM2
Tgfa	0.0222269	0.0387902	0.00959825	Junb	0.00175955	TM2
Tgfa	0.0222269	0.0387902	0.00959825	Ptgs2	0.00394481	TM2
Tgfa	0.0222269	0.0387902	0.00959825	Plat	0.00230021	TM2
Tgfb1	1.17284	0.59281	0.349934	Vim	0.00539501	TM1
Tgfb1	1.17284	0.59281	0.349934	Thbs1	0.00592597	TM2
Tgfb1	1.17284	0.59281	0.349934	Thbs1	0.00592597	TM1
Tgfb1	1.17284	0.59281	0.349934	Icam2	0.00515318	BECs
Tgfb1	1.17284	0.59281	0.349934	Thbs2	0.00762564	TM1
Tgfb1	1.17284	0.59281	0.349934	Ctnnb1	0.00543234	BECs
Tgfb1	1.17284	0.59281	0.349934	Timp1	0.0051466	TM1
Tgfb1	1.17284	0.59281	0.349934	Tagln	0.00666074	TM1
Tgfb1	1.17284	0.59281	0.349934	Junb	0.00573523	TM3
Tgfb1	1.17284	0.59281	0.349934	Pdgfb	0.00625817	BECs
Tgfb1	1.17284	0.59281	0.349934	Col1a2	0.00782832	TM2
Tgfb1	1.17284	0.59281	0.349934	Tgfbr2	0.00629792	TM1
Tgfb1	1.17284	0.59281	0.349934	Edn1	0.00592788	BECs
Tgfb1	1.17284	0.59281	0.349934	Fbn1	0.00494534	TM2
Tgfb1	1.17284	0.59281	0.349934	Junb	0.00573523	TM2
Tgfb1	1.17284	0.59281	0.349934	Pdgfrb	0.00697117	TM3
Tgfb1	1.17284	0.59281	0.349934	Hgf	0.00497546	TM3
Tgfb1	1.17284	0.59281	0.349934	Mmp2	0.00539083	TM1
Tgfb1	1.17284	0.59281	0.349934	Tagln	0.00666074	TM3
Tgfb1	1.17284	0.59281	0.349934	Cd38	0.00496508	BECs
Tgfb1	1.17284	0.59281	0.349934	Col1a1	0.00551568	TM2
Tgfb1	1.17284	0.59281	0.349934	Vim	0.00539501	TM2
Tgfb1	1.17284	0.59281	0.349934	Col1a2	0.00782832	TM3
Tgfb1	1.17284	0.59281	0.349934	Socs3	0.00567161	TM3
Tgfb1	1.17284	0.59281	0.349934	Postn	0.00556543	TM1
Tgfb1	1.17284	0.59281	0.349934	Eln	0.00698701	TM2
Tgfb1	1.17284	0.59281	0.349934	Hif1a	0.00512548	TM1
Tgfb1	1.17284	0.59281	0.349934	Col3a1	0.00527728	TM3
Tgfb1	1.17284	0.59281	0.349934	Serpine1	0.00587025	TM1
Tgfb1	1.17284	0.59281	0.349934	Pdgfrb	0.00697117	TM1
Tgfb1	1.17284	0.59281	0.349934	Socs1	0.00596863	TM2
Tgfb1	1.17284	0.59281	0.349934	Postn	0.00556543	TM3
Tgfb1	1.17284	0.59281	0.349934	Cdh2	0.00608964	TM1
Tgfb1	1.17284	0.59281	0.349934	Eln	0.00698701	TM3
Tgfb1	1.17284	0.59281	0.349934	Col3a1	0.00527728	TM2
Tgfb1	1.17284	0.59281	0.349934	Plaur	0.00573026	BECs
Tgfb1	1.17284	0.59281	0.349934	Smad6	0.00609637	BECs
Tgfb1	1.17284	0.59281	0.349934	Fbn1	0.00494534	TM1
Tgfb1	1.17284	0.59281	0.349934	Pdgfrb	0.00697117	TM2
Tgfb1	1.17284	0.59281	0.349934	Eln	0.00698701	TM1
Tgfb1	1.17284	0.59281	0.349934	Col3a1	0.00527728	TM1
Tgfb1	1.17284	0.59281	0.349934	Col1a2	0.00782832	TM1
Tgfb1	1.17284	0.59281	0.349934	Smad7	0.00607686	BECs
Tgfb1	1.17284	0.59281	0.349934	Tnfsf10	0.006184	BECs
Tgfb1	1.17284	0.59281	0.349934	Vim	0.00539501	TM3
Tgfb1	1.17284	0.59281	0.349934	Col1a1	0.00551568	TM1
Tgfb1	1.17284	0.59281	0.349934	Col5a1	0.00518055	TM1
Tgfb1	1.17284	0.59281	0.349934	Fn1	0.00583984	TM1
Tgfb2	1.01285	0.33009	0.30214	Cyp26b1	0.00696006	TM1
Tgfb2	1.01285	0.33009	0.30214	Serpine1	0.00604056	TM1
Tgfb2	1.01285	0.33009	0.30214	Wscd1	0.00600175	SECs
Tgfb2	1.01285	0.33009	0.30214	Utrn	0.00587276	SECs
Tgfb2	1.01285	0.33009	0.30214	Tnmd	0.00654428	TM1
Tgfb2	1.01285	0.33009	0.30214	Serpine1	0.00604056	SECs
Tgfb2	1.01285	0.33009	0.30214	Sned1	0.00580253	SECs
Tgfb2	1.01285	0.33009	0.30214	Col1a2	0.0057728	TM1
Tgfb2	1.01285	0.33009	0.30214	Mustn1	0.00644025	TM3
Tgfb2	1.01285	0.33009	0.30214	Ecscr	0.00660111	SECs
Tgfb2	1.01285	0.33009	0.30214	Col1a2	0.0057728	TM3
Tgfb3	2.70718	1.21978	0.5143	Serpine1	0.00474247	TM1
Tgfb3	2.70718	1.21978	0.5143	Runx1	0.00166749	TM1
Tgfb3	2.70718	1.21978	0.5143	Ncam1	0.00226851	TM1
Tgfb3	2.70718	1.21978	0.5143	Id2	0.00175023	TM1
Tgfb3	2.70718	1.21978	0.5143	Fgf18	0.00231237	TM1
Tgfb3	2.70718	1.21978	0.5143	Spp1	0.00219668	TM1
Tgfb3	2.70718	1.21978	0.5143	Lmna	0.00151856	TM1
Tgfb3	2.70718	1.21978	0.5143	Hes1	0.00185618	TM1
Tgfb3	2.70718	1.21978	0.5143	Fn1	0.00446921	TM1
Tgfb3	2.70718	1.21978	0.5143	Acta2	0.00407582	TM1
Tgfb3	2.70718	1.21978	0.5143	Sptbn1	0.0015475	TM1
Tgfb3	2.70718	1.21978	0.5143	Id3	0.00202957	TM1
Tgfb3	2.70718	1.21978	0.5143	Tgfbr2	0.00163194	TM1
Tgfb3	2.70718	1.21978	0.5143	Gadd45b	0.00176035	TM1
Tgfb3	2.70718	1.21978	0.5143	Tnc	0.00642598	TM1
Tgfb3	2.70718	1.21978	0.5143	Gsn	0.00167114	TM1
Tgfb3	2.70718	1.21978	0.5143	Cdh2	0.00246095	TM1
Tgfb3	2.70718	1.21978	0.5143	Dcn	0.0023277	TM1
Tnc	0.913656	0.488314	0.0306839	Junb	0.00137323	TM2
Tnc	0.913656	0.488314	0.0306839	Timp3	0.00222441	TM2
Tnc	0.913656	0.488314	0.0306839	Brd2	0.00114719	TM2
Tnc	0.913656	0.488314	0.0306839	Ier2	0.00115269	TM2
Tnc	0.913656	0.488314	0.0306839	Id2	0.00121055	TM2
Tnc	0.913656	0.488314	0.0306839	Vegfa	0.00129953	TM2
Tnc	0.913656	0.488314	0.0306839	Zfp36l1	0.00120325	TM2
Tnc	0.913656	0.488314	0.0306839	Ar	0.0023895	TM2
Tnc	0.913656	0.488314	0.0306839	Id3	0.00129576	TM2
Tnc	0.913656	0.488314	0.0306839	Gsn	0.00114206	TM2
Tnc	0.913656	0.488314	0.0306839	Nfkbia	0.00122998	TM2
Tnc	0.913656	0.488314	0.0306839	Cebpb	0.00120165	TM2
Tnc	0.913656	0.488314	0.0306839	Cyp1b1	0.0011445	TM2
Tnc	0.913656	0.488314	0.0306839	Hexim1	0.0011477	TM2
Tnc	0.913656	0.488314	0.0306839	Gadd45b	0.00120293	TM2
Tnc	0.913656	0.488314	0.0306839	Fos	0.00127262	TM2
Tnc	0.913656	0.488314	0.0306839	Ednra	0.00239118	TM2
Tnf	0.00398995	0.0244736	0.00472421	Mmp3	0.00646398	TM1
Tnf	0.00398995	0.0244736	0.00472421	Nos3	0.0060809	SECs
Tnf	0.00398995	0.0244736	0.00472421	Icam1	0.00832031	TM1
Tnf	0.00398995	0.0244736	0.00472421	Vcam1	0.00977502	CCs
Tnf	0.00398995	0.0244736	0.00472421	Pecam1	0.00693921	SECs
Tnf	0.00398995	0.0244736	0.00472421	Selp	0.00750142	CCs
Tnf	0.00398995	0.0244736	0.00472421	Traf1	0.00587139	CCs
Tnf	0.00398995	0.0244736	0.00472421	Angpt1	0.00635844	TM1
Tnf	0.00398995	0.0244736	0.00472421	Icam1	0.00832031	TM2
Tnf	0.00398995	0.0244736	0.00472421	Plat	0.00582386	TM2
Tnf	0.00398995	0.0244736	0.00472421	Cyp1b1	0.00596127	TM2
Tnf	0.00398995	0.0244736	0.00472421	Cd38	0.00629404	BECs
Tnf	0.00398995	0.0244736	0.00472421	Cp	0.00681893	SECs
Tnf	0.00398995	0.0244736	0.00472421	Pecam1	0.00693921	CCs
Tnf	0.00398995	0.0244736	0.00472421	Sele	0.0120495	CCs
Tnf	0.00398995	0.0244736	0.00472421	Ccl11	0.00772437	TM2
Tnf	0.00398995	0.0244736	0.00472421	Pecam1	0.00693921	BECs
Tnf	0.00398995	0.0244736	0.00472421	Mylk	0.00585544	TM1
Tnf	0.00398995	0.0244736	0.00472421	Icam1	0.00832031	CCs
Tnf	0.00398995	0.0244736	0.00472421	Vcam1	0.00977502	TM1
Tnf	0.00398995	0.0244736	0.00472421	Plat	0.00582386	TM1
Tnf	0.00398995	0.0244736	0.00472421	Ccl7	0.00615379	TM2
Tnf	0.00398995	0.0244736	0.00472421	Nos3	0.0060809	BECs
Tnf	0.00398995	0.0244736	0.00472421	Ccl19	0.00897989	TM2
Tnf	0.00398995	0.0244736	0.00472421	Selp	0.00750142	SECs
Tnf	0.00398995	0.0244736	0.00472421	Nos3	0.0060809	CCs
Tnf	0.00398995	0.0244736	0.00472421	Ahr	0.00584524	SECs
Tnf	0.00398995	0.0244736	0.00472421	Angpt1	0.00635844	TM2
Tnf	0.00398995	0.0244736	0.00472421	Sele	0.0120495	SECs
Vcam1	1.46946	1.1345	0.956353	Edn1	0.000787123	CCs
Vcam1	1.46946	1.1345	0.956353	Icam1	0.000833354	CCs
Vcam1	1.46946	1.1345	0.956353	Atf3	0.000913451	CCs
Vcam1	1.46946	1.1345	0.956353	Zfp36	0.000903505	CCs
Vcam1	1.46946	1.1345	0.956353	Nfkbia	0.000917459	CCs
Vcam1	1.46946	1.1345	0.956353	Lmna	0.000922308	CCs
Vcam1	1.46946	1.1345	0.956353	Ets1	0.000828797	CCs
Vcam1	1.46946	1.1345	0.956353	Sele	0.00204193	CCs
Vcam1	1.46946	1.1345	0.956353	Nos3	0.000838073	CCs
Vcam1	1.46946	1.1345	0.956353	Ahnak	0.000849889	CCs
Vegfa	0.602998	1.53505	0.328739	Plvap	0.00235133	CCs
Vegfa	0.602998	1.53505	0.328739	Mef2c	0.00237211	CCs
Vegfa	0.602998	1.53505	0.328739	Igf2	0.00250769	TM1
Vegfa	0.602998	1.53505	0.328739	Pdgfb	0.0026285	CCs
Vegfa	0.602998	1.53505	0.328739	Egr3	0.00249023	BECs
Vegfa	0.602998	1.53505	0.328739	Timp2	0.00432248	TM3
Vegfa	0.602998	1.53505	0.328739	Plpp3	0.00475692	CCs
Vegfa	0.602998	1.53505	0.328739	Vwf	0.0025103	BECs
Vegfa	0.602998	1.53505	0.328739	Plpp3	0.00475692	TM3
Vegfa	0.602998	1.53505	0.328739	Timp2	0.00432248	TM1
Vegfa	0.602998	1.53505	0.328739	Junb	0.00263408	TM3
Vegfa	0.602998	1.53505	0.328739	Sparc	0.00237302	BECs
Vegfa	0.602998	1.53505	0.328739	Ace	0.00606607	CCs
Vegfa	0.602998	1.53505	0.328739	Sparc	0.00237302	SECs
Vegfa	0.602998	1.53505	0.328739	Sparc	0.00237302	TM3
Vegfa	0.602998	1.53505	0.328739	Nos3	0.00284045	CCs
Vegfa	0.602998	1.53505	0.328739	Id3	0.00267276	TM3
Vegfa	0.602998	1.53505	0.328739	Traf1	0.00452192	CCs
Vegfa	0.602998	1.53505	0.328739	Timp2	0.00432248	SECs
Vegfa	0.602998	1.53505	0.328739	Sparc	0.00237302	TM1
Vegfa	0.602998	1.53505	0.328739	Fosb	0.00245308	TM1
Vegfa	0.602998	1.53505	0.328739	Cav1	0.00246684	BECs
Vegfa	0.602998	1.53505	0.328739	Cd34	0.00258383	SECs
Vegfa	0.602998	1.53505	0.328739	Hes1	0.00270303	TM1
Vegfa	0.602998	1.53505	0.328739	Pecam1	0.00252421	CCs
Vegfa	0.602998	1.53505	0.328739	Plpp3	0.00475692	TM1
Vegfa	0.602998	1.53505	0.328739	Cd34	0.00258383	BECs
Vegfa	0.602998	1.53505	0.328739	Mmp2	0.00528091	TM1
Vegfa	0.602998	1.53505	0.328739	Kdr	0.00470956	BECs
Vegfa	0.602998	1.53505	0.328739	Hgf	0.00484794	TM3
Vegfa	0.602998	1.53505	0.328739	Cav1	0.00246684	SECs
Vegfa	0.602998	1.53505	0.328739	Vwf	0.0025103	CCs
Vegfa	0.602998	1.53505	0.328739	Hif1a	0.00387769	TM1
Vegfa	0.602998	1.53505	0.328739	Irf1	0.00462712	TM3
Vegfa	0.602998	1.53505	0.328739	S1pr1	0.00595043	BECs
Vegfa	0.602998	1.53505	0.328739	Id3	0.00267276	TM1
Vegfa	0.602998	1.53505	0.328739	Egr1	0.00391958	BECs
Vegfa	0.602998	1.53505	0.328739	S1pr1	0.00595043	SECs
Vegfa	0.602998	1.53505	0.328739	Mcl1	0.00249151	CCs
Vegfa	0.602998	1.53505	0.328739	Stc1	0.00238827	BECs
Vegfa	0.602998	1.53505	0.328739	Bin1	0.0043747	SECs
Vegfa	0.602998	1.53505	0.328739	S1pr1	0.00595043	CCs
Vegfa	0.602998	1.53505	0.328739	Id3	0.00267276	BECs
Vegfa	0.602998	1.53505	0.328739	Ptgs2	0.00401647	TM1
Vegfa	0.602998	1.53505	0.328739	Mcl1	0.00249151	BECs
Vegfa	0.602998	1.53505	0.328739	Igf2	0.00250769	TM3
Vegfa	0.602998	1.53505	0.328739	Ptp4a3	0.00238273	BECs
Vegfa	0.602998	1.53505	0.328739	Adam15	0.00237618	BECs
Vegfa	0.602998	1.53505	0.328739	Plvap	0.00235133	SECs
Vegfa	0.602998	1.53505	0.328739	Kdr	0.00470956	CCs
Vegfa	0.602998	1.53505	0.328739	Mef2c	0.00237211	SECs
Vegfa	0.602998	1.53505	0.328739	Plvap	0.00235133	BECs
Vegfa	0.602998	1.53505	0.328739	Flt1	0.00253554	BECs
Vegfa	0.602998	1.53505	0.328739	Flt4	0.00245117	BECs
Vegfa	0.602998	1.53505	0.328739	Hes1	0.00270303	BECs
Vegfa	0.602998	1.53505	0.328739	Egr1	0.00391958	TM3
Vegfa	0.602998	1.53505	0.328739	Serpine1	0.00276794	TM1
Vegfa	0.602998	1.53505	0.328739	Fos	0.0023812	TM3
Vegfa	0.602998	1.53505	0.328739	Egr3	0.00249023	CCs
Vegfa	0.602998	1.53505	0.328739	Egr1	0.00391958	TM1
Vegfa	0.602998	1.53505	0.328739	Pecam1	0.00252421	SECs
Vegfa	0.602998	1.53505	0.328739	Pecam1	0.00252421	BECs
Vegfa	0.602998	1.53505	0.328739	Serpine1	0.00276794	SECs
Vegfa	0.602998	1.53505	0.328739	Ets1	0.00281134	CCs
Vegfa	0.602998	1.53505	0.328739	Flt1	0.00253554	CCs
Vegfa	0.602998	1.53505	0.328739	Nos3	0.00284045	SECs
Vegfa	0.602998	1.53505	0.328739	Notch4	0.0029234	BECs
Vegfa	0.602998	1.53505	0.328739	Ets1	0.00281134	BECs
Vegfa	0.602998	1.53505	0.328739	Ace	0.00606607	BECs
Vegfa	0.602998	1.53505	0.328739	Cd34	0.00258383	CCs
Vegfa	0.602998	1.53505	0.328739	Kdr	0.00470956	SECs
Vegfa	0.602998	1.53505	0.328739	Mef2c	0.00237211	BECs
Vegfa	0.602998	1.53505	0.328739	Irf1	0.00462712	BECs
Vegfa	0.602998	1.53505	0.328739	Flt4	0.00245117	SECs
Vegfa	0.602998	1.53505	0.328739	Cav1	0.00246684	CCs
Vegfa	0.602998	1.53505	0.328739	Plpp3	0.00475692	BECs
Vegfa	0.602998	1.53505	0.328739	Pdgfb	0.0026285	BECs
Vegfa	0.602998	1.53505	0.328739	Nos3	0.00284045	BECs
Vegfa	0.602998	1.53505	0.328739	Ets1	0.00281134	SECs
Vegfc	0.227473	0.338319	0.566544	Cdkn1a	0.00175765	SECs
Vegfc	0.227473	0.338319	0.566544	Msn	0.00220931	SECs
Vegfc	0.227473	0.338319	0.566544	Nfkbia	0.0014966	SECs
Vegfc	0.227473	0.338319	0.566544	Zfp36	0.00146204	CCs
Vegfc	0.227473	0.338319	0.566544	Plec	0.00153399	SECs
Vegfc	0.227473	0.338319	0.566544	Kdr	0.00243976	SECs
Vegfc	0.227473	0.338319	0.566544	Edn1	0.00132456	CCs
Vegfc	0.227473	0.338319	0.566544	Serpine1	0.00151217	SECs
Vegfc	0.227473	0.338319	0.566544	Nfkbia	0.0014966	CCs
Vegfc	0.227473	0.338319	0.566544	Ahnak	0.00135336	CCs
Vegfc	0.227473	0.338319	0.566544	Lmna	0.00138651	CCs
Vegfc	0.227473	0.338319	0.566544	Lmna	0.00138651	SECs
Vegfc	0.227473	0.338319	0.566544	Nrp2	0.00229929	SECs
Vegfc	0.227473	0.338319	0.566544	Msn	0.00220931	CCs
Vegfc	0.227473	0.338319	0.566544	Nrp2	0.00229929	CCs
Vegfc	0.227473	0.338319	0.566544	Flt4	0.00240635	SECs
Vegfc	0.227473	0.338319	0.566544	Kdr	0.00243976	CCs
