# Supplementary material for: Single-cell profiling of trabecular meshwork identifies mitochondrial dysfunction in a glaucoma model that is protected by vitamin B3 treatment
Source: eLife. 2026 Jan 20;14:RP107161. doi: 10.7554/eLife.107161 (PMC12818872; doi:10.7554/eLife.107161)
Supplement: Supplementary file 5. [file elife-107161-supp5.xlsx]

## Sheet: File 5
Analysis	Category	ID	Group	Description	p.adjust	Genes_in_pathway
iop_gwas	BP	GO:0030198	iop_gwas_BP_GO:0030198	extracellular matrix organization	8.28e-07	16
iop_gwas	BP	GO:0043062	iop_gwas_BP_GO:0043062	extracellular structure organization	8.28e-07	16
iop_gwas	BP	GO:0045229	iop_gwas_BP_GO:0045229	external encapsulating structure organization	8.28e-07	16
iop_gwas	BP	GO:0014706	iop_gwas_BP_GO:0014706	striated muscle tissue development	0.00243798	14
iop_gwas	BP	GO:0060537	iop_gwas_BP_GO:0060537	muscle tissue development	0.00362413	14
iop_gwas	BP	GO:0001655	iop_gwas_BP_GO:0001655	urogenital system development	0.00514946	12
iop_gwas	BP	GO:0031589	iop_gwas_BP_GO:0031589	cell-substrate adhesion	0.00514946	12
iop_gwas	BP	GO:0090287	iop_gwas_BP_GO:0090287	regulation of cellular response to growth factor stimulus	0.00504665	11
iop_gwas	BP	GO:0018108	iop_gwas_BP_GO:0018108	peptidyl-tyrosine phosphorylation	0.00573838	11
iop_gwas	BP	GO:0072001	iop_gwas_BP_GO:0072001	renal system development	0.00573838	11
iop_gwas	BP	GO:0018212	iop_gwas_BP_GO:0018212	peptidyl-tyrosine modification	0.00573838	11
iop_gwas	BP	GO:0007517	iop_gwas_BP_GO:0007517	muscle organ development	0.00573838	11
iop_gwas	BP	GO:0045444	iop_gwas_BP_GO:0045444	fat cell differentiation	0.00573838	10
iop_gwas	BP	GO:0045598	iop_gwas_BP_GO:0045598	regulation of fat cell differentiation	0.00514946	8
iop_gwas	BP	GO:0048010	iop_gwas_BP_GO:0048010	vascular endothelial growth factor receptor signaling pathway	0.00691956	5
iop_gwas	CC	GO:0031012	iop_gwas_CC_GO:0031012	extracellular matrix	2.71e-08	20
iop_gwas	CC	GO:0030312	iop_gwas_CC_GO:0030312	external encapsulating structure	2.71e-08	20
iop_gwas	CC	GO:0062023	iop_gwas_CC_GO:0062023	collagen-containing extracellular matrix	9.25e-08	17
iop_gwas	MF	GO:0001228	iop_gwas_MF_GO:0001228	DNA-binding transcription activator activity, RNA polymerase II-specific	0.000641345	14
iop_gwas	MF	GO:0001216	iop_gwas_MF_GO:0001216	DNA-binding transcription activator activity	0.000641345	14
iop_gwas	MF	GO:0003779	iop_gwas_MF_GO:0003779	actin binding	0.00168512	13
iop_gwas	MF	GO:0005201	iop_gwas_MF_GO:0005201	extracellular matrix structural constituent	2.73e-05	10
poag_gwas	BP	GO:0030198	poag_gwas_BP_GO:0030198	extracellular matrix organization	3.83e-06	17
poag_gwas	BP	GO:0043062	poag_gwas_BP_GO:0043062	extracellular structure organization	3.83e-06	17
poag_gwas	BP	GO:0045229	poag_gwas_BP_GO:0045229	external encapsulating structure organization	3.83e-06	17
poag_gwas	BP	GO:0001655	poag_gwas_BP_GO:0001655	urogenital system development	0.00100852	15
poag_gwas	BP	GO:0031589	poag_gwas_BP_GO:0031589	cell-substrate adhesion	0.00100852	15
poag_gwas	BP	GO:0032870	poag_gwas_BP_GO:0032870	cellular response to hormone stimulus	0.00915293	15
poag_gwas	BP	GO:0072001	poag_gwas_BP_GO:0072001	renal system development	0.00100852	14
poag_gwas	BP	GO:0051056	poag_gwas_BP_GO:0051056	regulation of small GTPase mediated signal transduction	0.00131255	13
poag_gwas	BP	GO:0001822	poag_gwas_BP_GO:0001822	kidney development	0.00910692	12
poag_gwas	BP	GO:0046578	poag_gwas_BP_GO:0046578	regulation of Ras protein signal transduction	0.00910692	11
poag_gwas	BP	GO:0035023	poag_gwas_BP_GO:0035023	regulation of Rho protein signal transduction	0.00316245	9
poag_gwas	CC	GO:0031012	poag_gwas_CC_GO:0031012	extracellular matrix	0.00352397	15
poag_gwas	CC	GO:0030312	poag_gwas_CC_GO:0030312	external encapsulating structure	0.00352397	15
poag_gwas	CC	GO:0062023	poag_gwas_CC_GO:0062023	collagen-containing extracellular matrix	0.00352397	13
poag_gwas_replicated	BP	GO:0030198	poag_gwas_replicated_BP_GO:0030198	extracellular matrix organization	0.00646026	7
poag_gwas_replicated	BP	GO:0043062	poag_gwas_replicated_BP_GO:0043062	extracellular structure organization	0.00646026	7
poag_gwas_replicated	BP	GO:0045229	poag_gwas_replicated_BP_GO:0045229	external encapsulating structure organization	0.00646026	7
