# Supplementary material for: Single-cell profiling of trabecular meshwork identifies mitochondrial dysfunction in a glaucoma model that is protected by vitamin B3 treatment
Source: eLife. 2026 Jan 20;14:RP107161. doi: 10.7554/eLife.107161 (PMC12818872; doi:10.7554/eLife.107161)
Supplement: Supplementary file 6. [file elife-107161-supp6.xlsx]

## Sheet: File 6
Group	TM_subtypes	Category	ID	Description	Pathway_TM_cell	GeneRatio_go	BgRatio_go	pvalue_go	p.adjust_go	qvalue_go	geneID_go	Count_go	setSize_gsea	enrichmentScore_gsea	Activity	NES_gsea	pvalue_gsea	p.adjust_gsea	qvalues_gsea	rank_gsea	leading_edge_gsea	core_enrichment_gsea
TM_BP_GO:0001501	TM	BP	GO:0001501	skeletal system development	TM	32/356	460/15888	1.44e-08	9.82e-06	7.86e-06	12111/17242/14219/21825/67671/270106/19662/16007/12842/16948/21833/12843/20692/12577/17313/99929/14683/17684/12832/77006/17390/16854/12394/12643/232174/15530/240725/18595/208647/14042/12845/22418	32	32	0.453449	Active	1.97318	0.00200524	0.124997	0.112852	105	tags=62%, list=28%, signal=49%	Thbs1/Ccn2/Bgn/Lox/Chad/Ccn1/Col5a2/Mmp2/Comp/Cyp26b1/Runx1/Col1a2/Col1a1/Lgals3/Pdgfra/Hspg2/Wnt5a/Sulf1/Ext1/Creb3l2
TM_BP_GO:0001503	TM	BP	GO:0001503	ossification	TM	33/356	365/15888	9.6e-12	9.79e-09	7.84e-09	17242/16477/14219/15081/67671/16011/16478/20750/12609/16007/12842/15078/16948/21833/66695/12843/14362/19242/17313/15903/100038882/19225/14683/14734/11732/17390/12394/72007/15530/14042/12845/22418/68713	33	33	0.362608	Active	1.58648	0.0381395	0.314924	0.284326	89	tags=52%, list=24%, signal=43%	Ccn2/Aspn/Lox/Igfbp5/Ptgs2/Fzd1/Ccn1/Mmp2/Comp/Ank/Ifitm1/Runx1/Col1a2/Col1a1/Hspg2/Wnt5a/Fndc3b
TM_BP_GO:0001649	TM	BP	GO:0001649	osteoblast differentiation	TM	14/356	194/15888	0.00012433	0.00745982	0.00597401	16477/15081/16011/16478/20750/12609/16007/12842/15078/16948/14362/15903/14683/72007	14	14	0.268443	Active	0.905895	0.572338	0.867225	0.782966	42	tags=29%, list=11%, signal=26%	Lox/Igfbp5/Fzd1/Ccn1
TM_BP_GO:0001655	TM	BP	GO:0001655	urogenital system development	TM	21/356	338/15888	2.63e-05	0.00261573	0.00209474	15205/22420/19662/20750/18073/21923/12577/56350/21419/15903/99929/14734/11504/17390/18654/240725/18595/12826/14042/22418/11826	21	21	-0.259592	Suppressed	-1.12099	0.311873	0.708998	0.640113	88	tags=43%, list=23%, signal=35%	Gpc3/Id3/Tiparp/Tfap2b/Cdkn1c/Wnt6/Nid1/Spp1/Rbp4
TM_BP_GO:0001763	TM	BP	GO:0001763	morphogenesis of a branching structure	TM	16/356	222/15888	4.21e-05	0.00381443	0.00305469	17242/12702/22420/21923/20315/17313/14734/68585/72780/12876/18654/240725/18595/12826/14042/22418	16	16	-0.218968	Suppressed	-0.849419	0.652406	0.877732	0.792453	26	tags=25%, list=7%, signal=24%	Cxcl12/Wnt6/Socs3/Mdk
TM_BP_GO:0001819	TM	BP	GO:0001819	positive regulation of cytokine production	TM	22/356	411/15888	0.000154569	0.00829789	0.00664516	12759/17242/16362/21825/16971/15507/17470/57320/50706/14433/12215/12520/21950/19225/68585/13057/230594/12394/17874/17022/240725/22418	22	22	0.30107	Active	1.1773	0.272945	0.685754	0.619127	49	tags=27%, list=13%, signal=25%	Clu/Thbs1/Cd200/Postn/Ptgs2/Lrp1
TM_BP_GO:0001890	TM	BP	GO:0001890	placenta development	TM	12/356	153/15888	0.000173212	0.00894562	0.00716388	16477/12702/15205/16007/12577/213742/19242/19225/17684/72780/18783/13030	12	12	0.272487	Active	0.871959	0.611045	0.867921	0.783595	83	tags=42%, list=22%, signal=34%	Hes1/Ptgs2/Ccn1/Pla2g4a/Ctsb
TM_BP_GO:0001893	TM	BP	GO:0001893	maternal placenta development	TM	6/356	27/15888	2.41e-05	0.00245986	0.00196992	16477/19242/19225/17684/18783/13030	6	6	0.317867	Active	0.795759	0.717857	0.891542	0.804921	83	tags=50%, list=22%, signal=40%	Ptgs2/Pla2g4a/Ctsb
TM_BP_GO:0002685	TM	BP	GO:0002685	regulation of leukocyte migration	TM	15/356	207/15888	6.85e-05	0.00490024	0.00392424	17242/21825/17470/57266/15945/71660/20315/19242/12520/68585/16854/17874/18654/11539/22418	15	15	0.313524	Active	1.08319	0.369182	0.74351	0.671271	17	tags=20%, list=5%, signal=20%	Cxcl14/Thbs1/Cd200
TM_BP_GO:0002690	TM	BP	GO:0002690	positive regulation of leukocyte chemotaxis	TM	9/356	90/15888	0.000184069	0.00904821	0.00724603	17242/21825/57266/15945/71660/20315/19242/18654/22418	9	9	-0.344717	Suppressed	-1.06214	0.375848	0.745709	0.673257	52	tags=56%, list=14%, signal=49%	Rarres2/Cxcl12/Ptn/Mdk/Cxcl10
TM_BP_GO:0003013	TM	BP	GO:0003013	circulatory system process	TM	24/356	465/15888	0.000136217	0.00793948	0.00635814	14219/16598/52589/16971/54409/15937/56188/23980/21833/98660/11816/12843/50706/71660/12293/19225/14683/20657/13057/17390/11475/11539/14042/12845	24	24	0.271137	Active	1.08734	0.359259	0.740492	0.668547	50	tags=29%, list=13%, signal=27%	Ccn2/Postn/Sod3/Ptgs2/Mmp2/Lrp1/Comp
TM_BP_GO:0006120	TM	BP	GO:0006120	mitochondrial electron transport, NADH to ubiquinone	TM	5/356	20/15888	6.45e-05	0.00470084	0.00376455	57320/67264/68197/66218/68375	5	5	-0.374663	Suppressed	-0.913222	0.569739	0.866603	0.782405	238	tags=100%, list=63%, signal=37%	Ndufc2/Ndufb9/Ndufb8/Park7
TM_BP_GO:0006979	TM	BP	GO:0006979	response to oxidative stress	TM	23/356	381/15888	1.72e-05	0.00200981	0.00160951	14281/21825/14004/268373/12955/15507/57320/16476/11816/14362/53381/19225/20657/14778/19823/12850/11758/17390/11852/18595/18453/15505/11826	23	23	0.293603	Active	1.16234	0.278545	0.690966	0.623832	48	tags=26%, list=13%, signal=24%	Thbs1/Gpx3/Sod3/Ptgs2/Fzd1/Mmp2
TM_BP_GO:0007005	TM	BP	GO:0007005	mitochondrion organization	TM	24/356	466/15888	0.000140715	0.00808613	0.00647558	14004/11739/57320/66734/15937/16476/66117/67264/15277/75406/68342/30954/66916/69875/68197/66218/93739/19823/22334/12850/15108/68375/12177/13179	24	24	-0.299025	Suppressed	-1.35618	0.128455	0.528449	0.477106	135	tags=58%, list=36%, signal=40%	Ndufa11/Ndufs7/Ndufb10/Ndufb7/Siva1/Ndufb8/Chchd2/Jun/Slc25a4/Fmc1/Park7/Dcn/Map1lc3a/Ier3
TM_BP_GO:0007162	TM	BP	GO:0007162	negative regulation of cell adhesion	TM	18/356	278/15888	5.82e-05	0.00448633	0.00359277	17242/16362/21825/16971/15507/12842/21923/50706/20315/18845/12703/20720/17390/16854/14114/12394/14190/20971	18	18	0.400454	Active	1.47303	0.0881151	0.467252	0.421855	93	tags=61%, list=25%, signal=48%	Thbs1/Tnc/Postn/Mmp2/Lrp1/Runx1/Col1a1/Lgals3/Sdc4/Fgl2/Fbln1
TM_BP_GO:0007178	TM	BP	GO:0007178	transmembrane receptor protein serine/threonine kinase signaling pathway	TM	22/356	320/15888	3.4e-06	0.000659803	0.000528387	14281/12825/21825/15205/14314/16476/16007/16948/65112/66695/12843/14362/21419/14734/17684/17874/240725/108075/22352/14042/12845/22418	22	22	0.530565	Active	2.07472	0.00159337	0.124997	0.112852	106	tags=68%, list=28%, signal=52%	Col3a1/Thbs1/Aspn/Hes1/Lox/Fstl1/Fzd1/Pmepa1/Ccn1/Comp/Col1a2/Wnt5a/Sulf1/Ext1/Ltbp4
TM_BP_GO:0007565	TM	BP	GO:0007565	female pregnancy	TM	11/356	109/15888	3.31e-05	0.00314005	0.00251463	16477/15081/16011/21857/19242/19225/17684/67968/18783/17390/13030	11	11	0.501032	Active	1.55791	0.0567986	0.369347	0.333462	83	tags=64%, list=22%, signal=51%	Timp1/Igfbp5/Ooep/Ptgs2/Mmp2/Pla2g4a/Ctsb
TM_BP_GO:0008015	TM	BP	GO:0008015	blood circulation	TM	23/356	438/15888	0.000145719	0.00814432	0.00652218	14219/16598/52589/54409/15937/56188/23980/21833/98660/11816/12843/50706/71660/12293/19225/14683/20657/13057/17390/11475/11539/14042/12845	23	23	0.238873	Active	0.945675	0.530411	0.843889	0.761898	50	tags=26%, list=13%, signal=24%	Ccn2/Postn/Sod3/Ptgs2/Mmp2/Comp
TM_BP_GO:0008217	TM	BP	GO:0008217	regulation of blood pressure	TM	13/356	169/15888	0.000114049	0.00720399	0.00576914	52589/54409/15937/98660/12843/50706/71660/19225/14683/13057/11475/11539/14042	13	13	-0.290488	Suppressed	-1.03845	0.41064	0.763183	0.689033	80	tags=46%, list=21%, signal=38%	Rarres2/Atp1a2/Ier3/Acta2/Ramp2/Ncald
TM_BP_GO:0009611	TM	BP	GO:0009611	response to wounding	TM	33/356	435/15888	9.72e-10	7.93e-07	6.35e-07	17242/12825/21825/14268/16971/268373/17938/16476/16007/12842/21923/16948/107589/11816/21857/22695/19242/22240/67916/14683/68585/20720/18783/17390/14114/14726/18595/11475/14042/12845/22418/20971/11826	33	33	0.471699	Active	2.06377	0.00108527	0.112164	0.101267	100	tags=61%, list=27%, signal=49%	Fn1/Col3a1/Thbs1/Timp1/Tnc/Lox/Ccn1/Mmp2/Lrp1/Comp/Pla2g4a/Dpysl3/Pdpn/Col1a1/Pdgfra/Sdc4/Wnt5a/Aqp1/Fbln1/Ext1
TM_BP_GO:0010257	TM	BP	GO:0010257	NADH dehydrogenase complex assembly	TM	8/356	48/15888	1.01e-05	0.00139765	0.00111927	67264/75406/68342/66916/69875/68197/66218/68375	8	8	-0.421026	Suppressed	-1.24399	0.215794	0.643827	0.581274	185	tags=88%, list=49%, signal=45%	Ndufc2/Ndufb9/Ndufa11/Ndufs7/Ndufb10/Ndufb7/Ndufb8
TM_BP_GO:0010466	TM	BP	GO:0010466	negative regulation of peptidase activity	TM	15/356	181/15888	1.43e-05	0.00171755	0.00137546	21825/21859/20716/12955/57320/23980/14433/21857/19225/14734/54208/15511/20720/74116/11826	15	15	0.483557	Active	1.67063	0.0295878	0.279212	0.252084	43	tags=40%, list=11%, signal=37%	Thbs1/Serpina3n/Timp1/Ptgs2/Timp3/Hspa1b
TM_BP_GO:0010810	TM	BP	GO:0010810	regulation of cell-substrate adhesion	TM	18/356	210/15888	1.23e-06	0.000299733	0.000240034	17242/21825/14268/16971/20750/18073/16007/12842/12837/50706/19242/320712/20163/14114/14726/18453/67896/20971	18	18	0.413413	Active	1.5207	0.0694785	0.416151	0.375718	110	tags=67%, list=29%, signal=50%	Fn1/Thbs1/Col8a1/Postn/Ccn1/Lrp1/Pdpn/Col1a1/Sdc4/Fbln1/P4hb/Ccdc80
TM_BP_GO:0010811	TM	BP	GO:0010811	positive regulation of cell-substrate adhesion	TM	14/356	129/15888	1.18e-06	0.000299733	0.000240034	17242/21825/14268/20750/18073/16007/12837/19242/320712/20163/14114/18453/67896/20971	14	14	0.324999	Active	1.09675	0.35365	0.73612	0.664599	13	tags=21%, list=3%, signal=21%	Fn1/Thbs1/Col8a1
TM_BP_GO:0010951	TM	BP	GO:0010951	negative regulation of endopeptidase activity	TM	12/356	138/15888	6.45e-05	0.00470084	0.00376455	21825/21859/20716/12955/57320/14433/21857/19225/54208/15511/20720/11826	12	12	0.572507	Active	1.83202	0.00957429	0.174297	0.157363	43	tags=50%, list=11%, signal=46%	Thbs1/Serpina3n/Timp1/Ptgs2/Timp3/Hspa1b
TM_BP_GO:0010976	TM	BP	GO:0010976	positive regulation of neuron projection development	TM	15/356	211/15888	8.5e-05	0.00578048	0.00462915	17242/16971/15507/11932/11816/14362/19242/22240/68585/11504/20720/52163/18103/208647/22418	15	15	-0.1835	Suppressed	-0.694452	0.841063	0.932078	0.841519	40	tags=20%, list=11%, signal=19%	Ptn/Hspb1/Mdk
TM_BP_GO:0018149	TM	BP	GO:0018149	peptide cross-linking	TM1_TM2	5/356	23/15888	0.000132498	0.00783466	0.0062742	12111/12825/21825/14268/13179	5	5	0.857783	Active	2.01029	0.000905141	0.112164	0.101267	18	tags=80%, list=5%, signal=77%	Fn1/Col3a1/Thbs1/Bgn
TM_BP_GO:0022900	TM	BP	GO:0022900	electron transport chain	TM	9/356	73/15888	3.53e-05	0.00327487	0.0026226	14004/57320/67264/12857/68197/66218/67680/12850/68375	9	9	-0.410372	Suppressed	-1.26444	0.199626	0.629672	0.568494	194	tags=89%, list=52%, signal=44%	Sdhb/Coq7/Ndufc2/Ndufb9/Cox4i1/Ndufb8/Chchd2/Park7
TM_BP_GO:0022904	TM	BP	GO:0022904	respiratory electron transport chain	TM	9/356	69/15888	2.23e-05	0.00233324	0.00186852	14004/57320/67264/12857/68197/66218/67680/12850/68375	9	9	-0.410372	Suppressed	-1.26444	0.199626	0.629672	0.568494	194	tags=89%, list=52%, signal=44%	Sdhb/Coq7/Ndufc2/Ndufb9/Cox4i1/Ndufb8/Chchd2/Park7
TM_BP_GO:0030168	TM	BP	GO:0030168	platelet activation	TM	9/356	78/15888	6.01e-05	0.00454366	0.00363868	14268/268373/11816/14683/20720/18783/14726/18595/12845	9	9	0.516604	Active	1.49422	0.0764265	0.436291	0.393902	77	tags=56%, list=20%, signal=45%	Fn1/Comp/Pla2g4a/Pdpn/Pdgfra
TM_BP_GO:0030198	TM	BP	GO:0030198	extracellular matrix organization	TM	34/356	282/15888	1e-15	1.52e-12	1.22e-12	14219/12825/13717/14268/54409/18073/11568/16007/12842/12837/16948/12843/50706/320712/53381/237759/12832/11504/16949/16917/17390/16854/14114/14726/17022/15530/240725/18595/108075/329941/67896/12826/14042/12845	34	34	0.584061	Active	2.57885	0.000154297	0.0832793	0.075188	110	tags=76%, list=29%, signal=59%	Fn1/Col3a1/Eln/Col8a1/Ccn2/Lox/Postn/Ccn1/Col5a2/Mmp2/Comp/Aebp1/Col1a2/Loxl1/Pdpn/Col1a1/Lgals3/Pdgfra/Hspg2/Col8a2/Fbln1/Sulf1/Ext1/Col4a1/Ltbp4/Ccdc80
TM_BP_GO:0030199	TM	BP	GO:0030199	collagen fibril organization	TM	11/356	57/15888	4.5e-08	2.62e-05	2.1e-05	12825/11568/12842/16948/12843/12832/16949/16917/17022/14042/12845	11	11	0.664918	Active	2.06749	0.00120482	0.114638	0.1035	74	tags=73%, list=20%, signal=60%	Col3a1/Lox/Col5a2/Comp/Aebp1/Col1a2/Loxl1/Col1a1
TM_BP_GO:0030282	TM	BP	GO:0030282	bone mineralization	TM	11/356	113/15888	4.63e-05	0.00401963	0.00321902	16007/16948/66695/12843/19242/17313/100038882/19225/14734/11732/12845	11	11	0.54018	Active	1.67964	0.0290878	0.27905	0.251937	67	tags=64%, list=18%, signal=54%	Aspn/Lox/Ptgs2/Ccn1/Comp/Ank/Col1a2
TM_BP_GO:0030323	TM	BP	GO:0030323	respiratory tube development	TM	17/356	207/15888	4.36e-06	0.000750646	0.000601137	14219/12654/16598/15205/16011/19662/21923/16948/21833/20692/17313/14734/14726/72007/18595/14042/22418	17	17	0.480233	Active	1.72835	0.0192276	0.226845	0.204805	100	tags=65%, list=27%, signal=50%	Chil1/Ccn2/Tnc/Hes1/Lox/Igfbp5/Pdpn/Pdgfra/Wnt5a/Fndc3b/Ext1
TM_BP_GO:0030324	TM	BP	GO:0030324	lung development	TM	17/356	204/15888	3.58e-06	0.0006637	0.000531508	14219/12654/16598/15205/16011/19662/21923/16948/21833/20692/17313/14734/14726/72007/18595/14042/22418	17	17	0.480233	Active	1.72835	0.0192276	0.226845	0.204805	100	tags=65%, list=27%, signal=50%	Chil1/Ccn2/Tnc/Hes1/Lox/Igfbp5/Pdpn/Pdgfra/Wnt5a/Fndc3b/Ext1
TM_BP_GO:0031214	TM	BP	GO:0031214	biomineral tissue development	TM	14/356	144/15888	4.42e-06	0.000750646	0.000601137	22420/20750/16007/12842/16948/66695/12843/19242/17313/100038882/19225/14734/11732/12845	14	14	0.419249	Active	1.41481	0.109846	0.506914	0.457663	74	tags=57%, list=20%, signal=48%	Aspn/Lox/Ptgs2/Ccn1/Comp/Ank/Col1a2/Col1a1
TM_BP_GO:0031346	TM	BP	GO:0031346	positive regulation of cell projection organization	TM	22/356	414/15888	0.000171362	0.00894562	0.00716388	17242/14268/16971/15507/19266/58804/11932/11816/14362/20315/19242/22240/56455/68585/18845/11504/20720/52163/18103/208647/22418/11826	22	22	-0.190638	Suppressed	-0.835237	0.669439	0.8804	0.794861	56	tags=27%, list=15%, signal=25%	Cdc42ep5/Cxcl12/Ptn/Ptprd/Hspb1/Mdk
TM_BP_GO:0031589	TM	BP	GO:0031589	cell-substrate adhesion	TM	22/356	339/15888	8.55e-06	0.0013424	0.00107503	17242/14219/12825/21825/14268/16971/20750/18073/16007/12842/12837/11932/50706/19242/320712/20163/14114/14726/72007/18453/67896/20971	22	22	0.454708	Active	1.77809	0.0144997	0.208219	0.187989	110	tags=68%, list=29%, signal=51%	Fn1/Col3a1/Thbs1/Col8a1/Ccn2/Postn/Ccn1/Lrp1/Pdpn/Col1a1/Sdc4/Fndc3b/Fbln1/P4hb/Ccdc80
TM_BP_GO:0031640	TM	BP	GO:0031640	killing of cells of other organism	TM	7/356	48/15888	8.93e-05	0.00587414	0.00470416	20085/57266/15945/14433/20315/16854/17874	7	7	-0.276381	Suppressed	-0.770725	0.744378	0.894291	0.807403	4	tags=57%, list=1%, signal=58%	Gapdh/Rps19/Cxcl12/Cxcl10
TM_BP_GO:0032981	TM	BP	GO:0032981	mitochondrial respiratory chain complex I assembly	TM	8/356	48/15888	1.01e-05	0.00139765	0.00111927	67264/75406/68342/66916/69875/68197/66218/68375	8	8	-0.421026	Suppressed	-1.24399	0.215794	0.643827	0.581274	185	tags=88%, list=49%, signal=45%	Ndufc2/Ndufb9/Ndufa11/Ndufs7/Ndufb10/Ndufb7/Ndufb8
TM_BP_GO:0034109	TM	BP	GO:0034109	homotypic cell-cell adhesion	TM	9/356	71/15888	2.82e-05	0.00273737	0.00219215	14268/268373/17967/67916/14683/20720/14726/18595/12845	9	9	0.411687	Active	1.19076	0.264352	0.680065	0.613991	77	tags=44%, list=20%, signal=36%	Fn1/Comp/Pdpn/Pdgfra
TM_BP_GO:0034599	TM	BP	GO:0034599	cellular response to oxidative stress	TM	17/356	261/15888	8.66e-05	0.00579015	0.0046369	14281/21825/14004/268373/15507/57320/16476/14362/20657/19823/12850/17390/11852/18595/18453/15505/11826	17	17	0.292946	Active	1.0543	0.39014	0.750418	0.677509	109	tags=47%, list=29%, signal=35%	Thbs1/Sod3/Fzd1/Mmp2/Pdgfra/Aqp1/P4hb/Hsph1
TM_BP_GO:0042060	TM	BP	GO:0042060	wound healing	TM	24/356	320/15888	2.52e-07	0.000102905	8.24e-05	12825/21825/14268/268373/17938/16007/12842/16948/107589/11816/21857/67916/14683/20720/18783/14114/14726/18595/11475/14042/12845/22418/20971/11826	24	24	0.536708	Active	2.15235	0.000633613	0.111508	0.100674	100	tags=67%, list=27%, signal=52%	Fn1/Col3a1/Thbs1/Timp1/Lox/Ccn1/Comp/Pla2g4a/Pdpn/Col1a1/Pdgfra/Sdc4/Wnt5a/Aqp1/Fbln1/Ext1
TM_BP_GO:0042773	TM	BP	GO:0042773	ATP synthesis coupled electron transport	TM	8/356	53/15888	2.16e-05	0.00231835	0.00185659	14004/57320/67264/12857/68197/66218/12850/68375	8	8	-0.419076	Suppressed	-1.23823	0.220156	0.643904	0.581343	187	tags=88%, list=50%, signal=45%	Coq7/Ndufc2/Ndufb9/Cox4i1/Ndufb8/Chchd2/Park7
TM_BP_GO:0042775	TM	BP	GO:0042775	mitochondrial ATP synthesis coupled electron transport	TM	8/356	52/15888	1.87e-05	0.00211865	0.00169667	14004/57320/67264/12857/68197/66218/12850/68375	8	8	-0.419076	Suppressed	-1.23823	0.220156	0.643904	0.581343	187	tags=88%, list=50%, signal=45%	Coq7/Ndufc2/Ndufb9/Cox4i1/Ndufb8/Chchd2/Park7
TM_BP_GO:0043062	TM	BP	GO:0043062	extracellular structure organization	TM	34/356	283/15888	1.12e-15	1.52e-12	1.22e-12	14219/12825/13717/14268/54409/18073/11568/16007/12842/12837/16948/12843/50706/320712/53381/237759/12832/11504/16949/16917/17390/16854/14114/14726/17022/15530/240725/18595/108075/329941/67896/12826/14042/12845	34	34	0.584061	Active	2.57885	0.000154297	0.0832793	0.075188	110	tags=76%, list=29%, signal=59%	Fn1/Col3a1/Eln/Col8a1/Ccn2/Lox/Postn/Ccn1/Col5a2/Mmp2/Comp/Aebp1/Col1a2/Loxl1/Pdpn/Col1a1/Lgals3/Pdgfra/Hspg2/Col8a2/Fbln1/Sulf1/Ext1/Col4a1/Ltbp4/Ccdc80
TM_BP_GO:0044706	TM	BP	GO:0044706	multi-multicellular organism process	TM	12/356	133/15888	4.49e-05	0.00398159	0.00318856	16477/15081/16011/21857/19242/19225/17684/67968/20720/18783/17390/13030	12	12	0.46469	Active	1.48701	0.0812105	0.449183	0.405541	83	tags=58%, list=22%, signal=47%	Timp1/Igfbp5/Ooep/Ptgs2/Mmp2/Pla2g4a/Ctsb
TM_BP_GO:0045229	TM	BP	GO:0045229	external encapsulating structure organization	TM	34/356	283/15888	1.12e-15	1.52e-12	1.22e-12	14219/12825/13717/14268/54409/18073/11568/16007/12842/12837/16948/12843/50706/320712/53381/237759/12832/11504/16949/16917/17390/16854/14114/14726/17022/15530/240725/18595/108075/329941/67896/12826/14042/12845	34	34	0.584061	Active	2.57885	0.000154297	0.0832793	0.075188	110	tags=76%, list=29%, signal=59%	Fn1/Col3a1/Eln/Col8a1/Ccn2/Lox/Postn/Ccn1/Col5a2/Mmp2/Comp/Aebp1/Col1a2/Loxl1/Pdpn/Col1a1/Lgals3/Pdgfra/Hspg2/Col8a2/Fbln1/Sulf1/Ext1/Col4a1/Ltbp4/Ccdc80
TM_BP_GO:0045765	TM	BP	GO:0045765	regulation of angiogenesis	TM	23/356	274/15888	5.93e-08	3.03e-05	2.42e-05	17242/12654/21825/16598/15507/54409/15945/20692/15277/19242/14645/68585/12226/11504/16854/11852/12394/18654/240725/21826/13179/22418/11826	23	23	-0.251001	Suppressed	-1.11864	0.317777	0.712564	0.643332	50	tags=30%, list=13%, signal=28%	Dcn/Ptn/Ramp2/Hspb1/Klf2/Mdk/Cxcl10
TM_BP_GO:0045766	TM	BP	GO:0045766	positive regulation of angiogenesis	TM	14/356	159/15888	1.39e-05	0.00171755	0.00137546	17242/12654/21825/15507/54409/15277/68585/12226/16854/11852/12394/18654/22418/11826	14	14	0.442284	Active	1.49254	0.0745144	0.427487	0.385953	90	tags=57%, list=24%, signal=45%	Chil1/Thbs1/Hk2/Btg1/Runx1/Lgals3/Wnt5a/Aqp1
TM_BP_GO:0045785	TM	BP	GO:0045785	positive regulation of cell adhesion	TM	27/356	417/15888	8.36e-07	0.00026243	0.000210161	17242/16362/21825/15205/14268/20750/18073/16007/12837/20315/19242/320712/12520/21950/67916/17684/20163/12703/16008/14114/12394/14726/18453/67896/15505/22418/20971	27	27	0.279261	Active	1.15749	0.284077	0.690966	0.623832	110	tags=52%, list=29%, signal=40%	Fn1/Thbs1/Col8a1/Hes1/Ccn1/Runx1/Pdpn/Sdc4/Igfbp2/Wnt5a/Fbln1/P4hb/Hsph1/Ccdc80
TM_BP_GO:0045861	TM	BP	GO:0045861	negative regulation of proteolysis	TM	17/356	272/15888	0.000142883	0.00809668	0.00648403	21825/21859/20716/12955/57320/23980/14433/21857/19225/14734/54208/93739/77006/15511/20720/74116/11826	17	17	0.44964	Active	1.61824	0.0386196	0.316626	0.285863	43	tags=35%, list=11%, signal=33%	Thbs1/Serpina3n/Timp1/Ptgs2/Timp3/Hspa1b
TM_BP_GO:0046034	TM	BP	GO:0046034	ATP metabolic process	TM	15/356	217/15888	0.000116368	0.00720399	0.00576914	14004/57320/15937/98660/67264/15277/14433/12857/68197/66218/11949/11674/228033/12850/68375	15	15	-0.285268	Suppressed	-1.07959	0.358486	0.740492	0.668547	187	tags=80%, list=50%, signal=42%	Coq7/Ndufc2/Ndufb9/Aldoa/Cox4i1/Atp5c1/Gapdh/Ndufb8/Chchd2/Park7/Atp1a2/Ier3
TM_BP_GO:0046697	TM	BP	GO:0046697	decidualization	TM	6/356	18/15888	1.79e-06	0.000406602	0.000325618	16477/19242/19225/17684/18783/13030	6	6	0.317867	Active	0.795759	0.717857	0.891542	0.804921	83	tags=50%, list=22%, signal=40%	Ptgs2/Pla2g4a/Ctsb
TM_BP_GO:0048608	TM	BP	GO:0048608	reproductive structure development	TM	26/356	397/15888	1.08e-06	0.000299733	0.000240034	22187/16477/15081/12702/15205/19662/16007/21923/12577/213742/19242/99929/53381/19225/17684/11504/72780/20720/18783/17390/67204/12394/13030/240725/18595/22418	26	26	0.239685	Active	0.982862	0.483048	0.810589	0.731833	112	tags=50%, list=30%, signal=38%	Tnc/Hes1/Ptgs2/Ccn1/Mmp2/Pla2g4a/Runx1/Pdgfra/Ctsb/Wnt5a/Sulf1/Eif2s2/Serpine2
TM_BP_GO:0048844	TM	BP	GO:0048844	artery morphogenesis	TM	10/356	69/15888	2.95e-06	0.000602446	0.000482454	17242/12825/15205/16971/107589/11816/21419/68585/17684/12845	10	10	0.399239	Active	1.20253	0.25269	0.669976	0.604882	50	tags=40%, list=13%, signal=36%	Col3a1/Hes1/Lrp1/Comp
TM_BP_GO:0050673	TM	BP	GO:0050673	epithelial cell proliferation	TM	23/356	419/15888	7.53e-05	0.00529839	0.00424308	17242/21825/15205/16011/16476/66117/12837/11816/20692/20315/22695/19242/14645/16010/14734/68585/13057/18148/18103/18654/240725/329941/22418	23	23	0.245532	Active	0.972039	0.496586	0.824066	0.744	31	tags=17%, list=8%, signal=17%	Thbs1/Col8a1/Hes1/Igfbp5
TM_BP_GO:0050878	TM	BP	GO:0050878	regulation of body fluid levels	TM	18/356	295/15888	0.000124008	0.00745982	0.00597401	21825/14268/268373/11816/21419/14683/22234/13057/20720/18783/14114/14726/232174/18595/11539/14042/12845/11826	18	18	0.537456	Active	1.97698	0.00326958	0.125295	0.113122	112	tags=72%, list=30%, signal=53%	Fn1/Thbs1/Comp/Ugcg/Pla2g4a/Cyp26b1/Pdpn/Pdgfra/Aqp1/Fbln1/Ext1/Adora1/Serpine2
TM_BP_GO:0050900	TM	BP	GO:0050900	leukocyte migration	TM	20/356	337/15888	7.73e-05	0.00534333	0.00427908	17242/21825/268373/17470/20750/20085/57266/15945/71660/20315/12215/19242/12520/68585/16854/17874/18654/11539/14042/22418	20	20	0.242199	Active	0.923247	0.546787	0.855326	0.772223	17	tags=15%, list=5%, signal=15%	Cxcl14/Thbs1/Cd200
TM_BP_GO:0051216	TM	BP	GO:0051216	cartilage development	TM	17/356	178/15888	5.39e-07	0.000199938	0.000160115	12111/17242/14219/21825/16007/12842/21833/17313/14683/77006/12394/15530/240725/208647/14042/12845/22418	17	17	0.520828	Active	1.87445	0.00608053	0.149442	0.134922	105	tags=71%, list=28%, signal=53%	Thbs1/Ccn2/Bgn/Ccn1/Comp/Runx1/Col1a1/Hspg2/Wnt5a/Sulf1/Ext1/Creb3l2
TM_BP_GO:0055078	TM	BP	GO:0055078	sodium ion homeostasis	TM	7/356	50/15888	0.000116535	0.00720399	0.00576914	20750/11932/98660/21419/14683/11539/14042	7	7	-0.44958	Suppressed	-1.25371	0.202157	0.629672	0.568494	89	tags=57%, list=24%, signal=44%	Atp1b2/Tfap2b/Atp1a2/Spp1
TM_BP_GO:0060326	TM	BP	GO:0060326	cell chemotaxis	TM	17/356	281/15888	0.000210609	0.0099917	0.00800161	17242/21825/268373/15507/20750/20085/57266/15945/16948/71660/20315/12215/19242/16854/18654/18595/22418	17	17	-0.298089	Suppressed	-1.1896	0.240684	0.658534	0.594552	80	tags=47%, list=21%, signal=39%	Rarres2/Bsg/Cxcl12/Ptn/Hspb1/Mdk/Spp1/Cxcl10
TM_BP_GO:0060343	TM	BP	GO:0060343	trabecula formation	TM	5/356	25/15888	0.000201643	0.00979408	0.00784335	19662/12842/11504/17390/12643	5	5	0.405365	Active	0.950007	0.519913	0.838704	0.757217	74	tags=60%, list=20%, signal=49%	Chad/Mmp2/Col1a1
TM_BP_GO:0060541	TM	BP	GO:0060541	respiratory system development	TM	17/356	232/15888	1.97e-05	0.0021669	0.00173531	14219/12654/16598/15205/16011/19662/21923/16948/21833/20692/17313/14734/14726/72007/18595/14042/22418	17	17	0.480233	Active	1.72835	0.0192276	0.226845	0.204805	100	tags=65%, list=27%, signal=50%	Chil1/Ccn2/Tnc/Hes1/Lox/Igfbp5/Pdpn/Pdgfra/Wnt5a/Fndc3b/Ext1
TM_BP_GO:0060840	TM	BP	GO:0060840	artery development	TM	11/356	97/15888	1.09e-05	0.00143405	0.00114843	17242/12825/15205/16971/16948/107589/11816/21419/68585/17684/12845	11	11	0.457557	Active	1.42273	0.107917	0.504603	0.455576	50	tags=45%, list=13%, signal=41%	Col3a1/Hes1/Lox/Lrp1/Comp
TM_BP_GO:0061138	TM	BP	GO:0061138	morphogenesis of a branching epithelium	TM	14/356	204/15888	0.000210562	0.0099917	0.00800161	17242/12702/22420/21923/20315/17313/14734/72780/18654/240725/18595/12826/14042/22418	14	14	-0.248575	Suppressed	-0.916071	0.556906	0.864138	0.780179	52	tags=29%, list=14%, signal=26%	Cxcl12/Wnt6/Socs3/Mdk
TM_BP_GO:0061448	TM	BP	GO:0061448	connective tissue development	TM	20/356	247/15888	7.79e-07	0.00026243	0.000210161	22187/12111/17242/14219/21825/114679/16007/12842/16948/21833/17313/14683/77006/12394/15530/240725/208647/14042/12845/22418	20	20	0.46392	Active	1.76844	0.0132066	0.20221	0.182564	105	tags=65%, list=28%, signal=49%	Thbs1/Ccn2/Bgn/Lox/Ccn1/Comp/Runx1/Col1a1/Hspg2/Wnt5a/Sulf1/Ext1/Creb3l2
TM_BP_GO:0061458	TM	BP	GO:0061458	reproductive system development	TM	26/356	400/15888	1.25e-06	0.000299733	0.000240034	22187/16477/15081/12702/15205/19662/16007/21923/12577/213742/19242/99929/53381/19225/17684/11504/72780/20720/18783/17390/67204/12394/13030/240725/18595/22418	26	26	0.239685	Active	0.982862	0.483048	0.810589	0.731833	112	tags=50%, list=30%, signal=38%	Tnc/Hes1/Ptgs2/Ccn1/Mmp2/Pla2g4a/Runx1/Pdgfra/Ctsb/Wnt5a/Sulf1/Eif2s2/Serpine2
TM_BP_GO:0061844	TM	BP	GO:0061844	antimicrobial humoral immune response mediated by antimicrobial peptide	TM	7/356	52/15888	0.000150213	0.00821356	0.00657763	20085/57266/15945/67248/14433/20315/16854	7	7	-0.274344	Suppressed	-0.765046	0.749197	0.894291	0.807403	4	tags=57%, list=1%, signal=58%	Gapdh/Rps19/Cxcl12/Cxcl10
TM_BP_GO:0062197	TM	BP	GO:0062197	cellular response to chemical stress	TM	19/356	302/15888	5.37e-05	0.00442701	0.00354526	14281/21825/14004/268373/15507/57320/16476/107589/14362/19225/20657/19823/12850/17390/11852/18595/18453/15505/11826	19	19	0.299772	Active	1.12652	0.321221	0.712564	0.643332	109	tags=47%, list=29%, signal=35%	Thbs1/Sod3/Ptgs2/Fzd1/Mmp2/Pdgfra/Aqp1/P4hb/Hsph1
TM_BP_GO:0070527	TM	BP	GO:0070527	platelet aggregation	TM	7/356	45/15888	5.83e-05	0.00448633	0.00359277	14268/268373/14683/20720/14726/18595/12845	7	7	0.552745	Active	1.4587	0.0897981	0.472569	0.426655	112	tags=71%, list=30%, signal=51%	Fn1/Comp/Pdpn/Pdgfra/Serpine2
TM_BP_GO:0071229	TM	BP	GO:0071229	cellular response to acid chemical	TM	9/356	77/15888	5.43e-05	0.00442701	0.00354526	12825/16598/12842/12843/12832/12703/17390/18595/12826	9	9	0.546492	Active	1.58067	0.049904	0.350693	0.31662	102	tags=78%, list=27%, signal=58%	Col3a1/Col5a2/Mmp2/Col1a2/Col1a1/Pdgfra/Col4a1
TM_BP_GO:0071230	TM	BP	GO:0071230	cellular response to amino acid stimulus	TM	8/356	65/15888	9.74e-05	0.00630517	0.00504934	12825/12842/12843/12832/12703/17390/18595/12826	8	8	0.675524	Active	1.86558	0.00389587	0.125295	0.113122	102	tags=88%, list=27%, signal=65%	Col3a1/Col5a2/Mmp2/Col1a2/Col1a1/Pdgfra/Col4a1
TM_BP_GO:0071634	TM	BP	GO:0071634	regulation of transforming growth factor beta production	TM	6/356	38/15888	0.000182723	0.00904821	0.00724603	21825/14268/17470/19225/14114/17022	6	6	0.759601	Active	1.90161	0.00287718	0.124997	0.112852	36	tags=67%, list=10%, signal=61%	Fn1/Thbs1/Cd200/Ptgs2
TM_BP_GO:0072001	TM	BP	GO:0072001	renal system development	TM	19/356	300/15888	4.91e-05	0.00417242	0.00334139	15205/22420/19662/20750/18073/12577/56350/21419/15903/99929/14734/11504/18654/240725/18595/12826/14042/22418/11826	19	19	-0.331257	Suppressed	-1.37376	0.119654	0.510361	0.460775	88	tags=47%, list=23%, signal=38%	Gpc3/Id3/Tiparp/Tfap2b/Cdkn1c/Wnt6/Nid1/Spp1/Rbp4
TM_BP_GO:0072593	TM	BP	GO:0072593	reactive oxygen species metabolic process	TM	19/356	268/15888	1.03e-05	0.00139765	0.00111927	12759/14219/21825/16598/12955/57320/15937/16007/15277/68197/53381/56455/19225/20657/13057/14778/12850/53881/11758	19	19	0.521934	Active	1.96138	0.00387597	0.125295	0.113122	42	tags=42%, list=11%, signal=39%	Clu/Thbs1/Ccn2/Gpx3/Hk2/Sod3/Ptgs2/Ccn1
TM_BP_GO:0097201	TM	BP	GO:0097201	negative regulation of transcription from RNA polymerase II promoter in response to stress	TM	4/356	13/15888	0.000150985	0.00821356	0.00657763	17872/16476/17684/81489	4	4	-0.569825	Suppressed	-1.27168	0.192106	0.628218	0.567181	100	tags=75%, list=27%, signal=56%	Cited2/Jun/Ppp1r15a
TM_BP_GO:0097529	TM	BP	GO:0097529	myeloid leukocyte migration	TM	15/356	204/15888	5.8e-05	0.00448633	0.00359277	17242/21825/268373/17470/20750/20085/15945/71660/20315/12215/12520/68585/16854/17874/18654	15	15	-0.318096	Suppressed	-1.20383	0.236651	0.652366	0.588983	12	tags=40%, list=3%, signal=40%	Rarres2/Bsg/Cxcl12/Mdk/Spp1/Cxcl10
TM_BP_GO:0110148	TM	BP	GO:0110148	biomineralization	TM	14/356	146/15888	5.19e-06	0.000847333	0.000678566	22420/20750/16007/12842/16948/66695/12843/19242/17313/100038882/19225/14734/11732/12845	14	14	0.419249	Active	1.41481	0.109846	0.506914	0.457663	74	tags=57%, list=20%, signal=48%	Aspn/Lox/Ptgs2/Ccn1/Comp/Ank/Col1a2/Col1a1
TM_BP_GO:1901342	TM	BP	GO:1901342	regulation of vasculature development	TM	23/356	278/15888	7.74e-08	3.51e-05	2.81e-05	17242/12654/21825/16598/15507/54409/15945/20692/15277/19242/14645/68585/12226/11504/16854/11852/12394/18654/240725/21826/13179/22418/11826	23	23	-0.251001	Suppressed	-1.11864	0.317777	0.712564	0.643332	50	tags=30%, list=13%, signal=28%	Dcn/Ptn/Ramp2/Hspb1/Klf2/Mdk/Cxcl10
TM_BP_GO:1903793	TM	BP	GO:1903793	positive regulation of anion transport	TM	24/356	474/15888	0.000181725	0.00904821	0.00724603	18245/16971/268373/19662/20750/56188/11816/20315/12215/12520/14645/19384/56455/19225/14734/54208/68585/70456/13057/18783/52163/16854/12394/11539	24	24	-0.198013	Suppressed	-0.898054	0.590244	0.867921	0.783595	174	tags=67%, list=46%, signal=38%	Cyba/Dynll1/Arl6ip1/Ran/Ppia/Cd81/Rtn4/Glul/Apoe/Gpc3/Fxyd1/Bsg/Cxcl12/Oaz1/Spp1/Rbp4
TM_BP_GO:1904018	TM	BP	GO:1904018	positive regulation of vasculature development	TM	14/356	159/15888	1.39e-05	0.00171755	0.00137546	17242/12654/21825/15507/54409/15277/68585/12226/16854/11852/12394/18654/22418/11826	14	14	0.442284	Active	1.49254	0.0745144	0.427487	0.385953	90	tags=57%, list=24%, signal=45%	Chil1/Thbs1/Hk2/Btg1/Runx1/Lgals3/Wnt5a/Aqp1
TM_BP_GO:1905906	TM	BP	GO:1905906	regulation of amyloid fibril formation	TM	5/356	14/15888	9.31e-06	0.00139765	0.00111927	12759/56612/12955/11816/15530	5	5	0.364215	Active	0.853569	0.653874	0.877732	0.792453	6	tags=20%, list=2%, signal=20%	Clu
TM_BP_GO:1905907	TM	BP	GO:1905907	negative regulation of amyloid fibril formation	TM	5/356	11/15888	2.27e-06	0.00048764	0.000390514	12759/56612/12955/11816/15530	5	5	0.364215	Active	0.853569	0.653874	0.877732	0.792453	6	tags=20%, list=2%, signal=20%	Clu
TM_BP_GO:1990000	TM	BP	GO:1990000	amyloid fibril formation	TM	5/356	24/15888	0.000164311	0.00870637	0.00697228	12759/56612/12955/11816/15530	5	5	0.364215	Active	0.853569	0.653874	0.877732	0.792453	6	tags=20%, list=2%, signal=20%	Clu
TM_BP_GO:2000146	TM	BP	GO:2000146	negative regulation of cell motility	TM	17/356	277/15888	0.000177668	0.00904821	0.00724603	12825/21825/16011/16971/17470/11932/11816/20315/21857/19242/22240/17684/14114/11852/240725/11539/13179	17	17	0.442377	Active	1.5921	0.0468365	0.342545	0.309264	62	tags=41%, list=16%, signal=36%	Col3a1/Thbs1/Timp1/Cd200/Igfbp5/Lrp1/Dpysl3
TM_CC_GO:0005581	TM	CC	GO:0005581	collagen trimer	TM	12/369	72/16013	8.31e-08	4.62e-06	4.17e-06	12825/12816/12842/12837/16948/12843/237759/12832/17022/329941/13179/12826	12	12	0.584157	Active	1.89075	0.00413722	0.0917083	0.0867364	102	tags=75%, list=27%, signal=56%	Col3a1/Col8a1/Lox/Col12a1/Col5a2/Col1a2/Col1a1/Col8a2/Col4a1
TM_CC_GO:0005583	TM	CC	GO:0005583	fibrillar collagen trimer	TM	5/369	11/16013	2.61e-06	6.38e-05	5.75e-05	12825/12842/12843/12832/17022	5	5	0.714318	Active	1.69447	0.0177721	0.315158	0.298072	74	tags=80%, list=20%, signal=65%	Col3a1/Col5a2/Col1a2/Col1a1
TM_CC_GO:0005604	TM	CC	GO:0005604	basement membrane	TM1_TM2	18/369	113/16013	1.02e-10	8.49e-09	7.64e-09	21859/14268/18073/12837/21923/20692/21857/19242/11504/16949/14114/12394/15530/21826/329941/14873/67896/12826	18	18	0.55869	Active	2.06958	0.00114342	0.0434499	0.0410942	110	tags=78%, list=29%, signal=58%	Fn1/Timp1/Col8a1/Tnc/Timp3/Runx1/Loxl1/Hspg2/Col8a2/Gsto1/Fbln1/Thbs2/Col4a1/Ccdc80
TM_CC_GO:0005743	TM	CC	GO:0005743	mitochondrial inner membrane	TM	22/369	407/16013	0.00020058	0.00320928	0.00289095	12759/11739/67264/75406/68342/66916/69875/12857/68197/66218/11949/22335/70456/67680/66594/22334/228033/12850/15108/68375/16854/407790	22	22	0.212095	Active	0.834969	0.665696	0.926103	0.875895	262	tags=91%, list=70%, signal=29%	Clu/Lgals3/Hsd17b10/Uqcr11/Ndufa8/Ndufa4l2/Vdac2/Vdac3/Atp5g3/Mpc2/Sdhb/Coq7/Ndufc2/Ndufb9/Cox4i1/Ndufa11/Atp5c1/Ndufs7/Ndufb10/Ndufb7
TM_CC_GO:0005746	TM	CC	GO:0005746	mitochondrial respirasome	TM	11/369	67/16013	3.39e-07	1.28e-05	1.16e-05	67264/75406/68342/66916/69875/12857/68197/66218/67680/68375/407790	11	11	-0.380822	Suppressed	-1.28822	0.177116	0.724812	0.685516	238	tags=100%, list=63%, signal=38%	Ndufa4l2/Sdhb/Ndufc2/Ndufb9/Cox4i1/Ndufa11/Ndufs7/Ndufb10/Ndufb7/Ndufb8
TM_CC_GO:0005747	TM	CC	GO:0005747	mitochondrial respiratory chain complex I	TM	8/369	41/16013	3.62e-06	7.53e-05	6.79e-05	67264/75406/68342/66916/69875/68197/66218/68375	8	8	-0.421026	Suppressed	-1.25423	0.210826	0.727291	0.687861	185	tags=88%, list=49%, signal=45%	Ndufc2/Ndufb9/Ndufa11/Ndufs7/Ndufb10/Ndufb7/Ndufb8
TM_CC_GO:0005791	TM	CC	GO:0005791	rough endoplasmic reticulum	TM	8/369	80/16013	0.000503466	0.00654506	0.00589585	19215/20335/23980/14645/22335/55934/54208/16976	8	8	-0.403007	Suppressed	-1.20055	0.252445	0.741109	0.70093	2	tags=88%, list=1%, signal=89%	Vdac3/Lrpap1/Arl6ip1/Rp9/Glul/Pebp1/Ptgds
TM_CC_GO:0005796	TM	CC	GO:0005796	Golgi lumen	TM	5/369	19/16013	5.63e-05	0.000937456	0.000844469	14734/20657/14733/15530/20971	5	5	0.576545	Active	1.36765	0.126786	0.724812	0.685516	101	tags=80%, list=27%, signal=59%	Sod3/Sdc4/Hspg2/Gpc1
TM_CC_GO:0005840	TM	CC	GO:0005840	ribosome	TM1_TM2	19/369	214/16013	5.56e-07	1.93e-05	1.74e-05	20005/67671/270106/19988/20103/20102/19921/20085/67248/121022/56040/100038882/20084/26961/64658/68565/68836/18148/27367	19	19	-0.285714	Suppressed	-1.19556	0.237005	0.740976	0.700805	275	tags=100%, list=73%, signal=28%	Rplp1/Rpl6/Rpl38/Rpl39/Npm1/Rpl8/Rps18/Mrps18a/Rpl3/Mrps25/Rpl19/Rps4x/Rpl13/Mrps6/Rps19/Rps5/Rpl9/Isg15
TM_CC_GO:0005844	TM	CC	GO:0005844	polysome	TM	7/369	66/16013	0.000789191	0.00994859	0.00896179	67671/19988/20102/19921/67248/26961/22352	7	7	0.363144	Active	0.97604	0.483999	0.863273	0.816472	242	tags=100%, list=64%, signal=36%	Vim/Rpl6/Rpl38/Rpl39/Rpl8/Rpl19/Rps4x
TM_CC_GO:0015934	TM	CC	GO:0015934	large ribosomal subunit	TM1_TM2	12/369	114/16013	1.25e-05	0.000226681	0.000204196	20005/67671/270106/19988/19921/67248/56040/26961/68565/68836/18148/27367	12	12	0.300381	Active	0.972251	0.48371	0.863273	0.816472	161	tags=75%, list=43%, signal=44%	Mrpl52/Rplp1/Rpl6/Rpl38/Rpl39/Npm1/Rpl8/Mrps18a/Rpl3
TM_CC_GO:0015935	TM	CC	GO:0015935	small ribosomal subunit	TM1_TM2	9/369	75/16013	5.46e-05	0.000937456	0.000844469	20103/20102/20085/121022/100038882/20084/64658/68565/18148	9	9	-0.381471	Suppressed	-1.19132	0.258385	0.741109	0.70093	237	tags=100%, list=63%, signal=38%	Rps18/Mrps18a/Mrps25/Rps4x/Mrps6/Rps19/Rps5/Isg15
TM_CC_GO:0019866	TM	CC	GO:0019866	organelle inner membrane	TM	23/369	447/16013	0.000293967	0.00407635	0.00367201	12759/11739/67264/75406/68342/66916/69875/12857/68197/66218/11949/19225/22335/70456/67680/66594/22334/228033/12850/15108/68375/16854/407790	23	23	0.221851	Active	0.886787	0.597292	0.926103	0.875895	262	tags=91%, list=70%, signal=29%	Clu/Ptgs2/Lgals3/Hsd17b10/Uqcr11/Ndufa8/Ndufa4l2/Vdac2/Vdac3/Atp5g3/Mpc2/Sdhb/Coq7/Ndufc2/Ndufb9/Cox4i1/Ndufa11/Atp5c1/Ndufs7/Ndufb10/Ndufb7
TM_CC_GO:0022625	TM	CC	GO:0022625	cytosolic large ribosomal subunit	All	9/369	55/16013	4.15e-06	7.98e-05	7.19e-05	20005/67671/270106/19988/19921/67248/56040/26961/27367	9	9	-0.324251	Suppressed	-1.01263	0.43604	0.834436	0.789197	258	tags=100%, list=69%, signal=32%	Rpl6/Rpl38/Rpl39/Rpl8/Rpl3/Rpl19/Rpl13/Rpl9
TM_CC_GO:0022626	TM	CC	GO:0022626	cytosolic ribosome	All	14/369	103/16013	1e-07	4.62e-06	4.17e-06	20005/67671/270106/19988/20103/20102/19921/20085/67248/56040/100038882/20084/26961/27367	14	14	-0.328729	Suppressed	-1.2268	0.211543	0.727291	0.687861	258	tags=100%, list=69%, signal=33%	Rpl6/Rpl38/Rpl39/Rpl8/Rps18/Rpl3/Rpl19/Rps4x/Rpl13/Rps19/Rps5/Rpl9/Isg15
TM_CC_GO:0030312	TM	CC	GO:0030312	external encapsulating structure	All	60/369	447/16013	4.21e-29	5.94e-27	5.35e-27	12111/29817/14219/12825/21825/13717/21859/20200/14268/16997/22420/12816/18073/16007/12842/12837/21923/16948/66695/11816/12843/20692/50706/22403/71660/21857/19242/17313/320712/14264/237759/14734/20657/18845/12832/11504/16949/20720/116847/17390/16854/14114/12394/20195/13030/17022/12643/14733/15530/21826/108075/14190/329941/13179/14873/67896/12826/12845/22418/18295	60	60	0.605188	Active	3.10254	0.000144613	0.00649002	0.00613817	112	tags=73%, list=30%, signal=61%	Fn1/Col3a1/Thbs1/Timp1/Eln/Col8a1/Ccn2/Bgn/Ltbp2/Aspn/Tnc/Fmod/Lox/Postn/Ccn5/Col12a1/Chad/Sod3/Prelp/Timp3/Ccn1/Igfbp7/Col5a2/Mmp2/Comp/Runx1/Col1a2/Loxl1/Col1a1/Lgals3/S100a6/Ctsb/Hspg2/Col8a2/Gsto1/Wnt5a/Fgl2/Fbln1/Thbs2/Gpc1/Col4a1/Ltbp4/Ccdc80/Serpine2
TM_CC_GO:0030964	TM	CC	GO:0030964	NADH dehydrogenase complex	TM	8/369	41/16013	3.62e-06	7.53e-05	6.79e-05	67264/75406/68342/66916/69875/68197/66218/68375	8	8	-0.421026	Suppressed	-1.25423	0.210826	0.727291	0.687861	185	tags=88%, list=49%, signal=45%	Ndufc2/Ndufb9/Ndufa11/Ndufs7/Ndufb10/Ndufb7/Ndufb8
TM_CC_GO:0031012	TM	CC	GO:0031012	extracellular matrix	All	60/369	446/16013	3.72e-29	5.94e-27	5.35e-27	12111/29817/14219/12825/21825/13717/21859/20200/14268/16997/22420/12816/18073/16007/12842/12837/21923/16948/66695/11816/12843/20692/50706/22403/71660/21857/19242/17313/320712/14264/237759/14734/20657/18845/12832/11504/16949/20720/116847/17390/16854/14114/12394/20195/13030/17022/12643/14733/15530/21826/108075/14190/329941/13179/14873/67896/12826/12845/22418/18295	60	60	0.605188	Active	3.10254	0.000144613	0.00649002	0.00613817	112	tags=73%, list=30%, signal=61%	Fn1/Col3a1/Thbs1/Timp1/Eln/Col8a1/Ccn2/Bgn/Ltbp2/Aspn/Tnc/Fmod/Lox/Postn/Ccn5/Col12a1/Chad/Sod3/Prelp/Timp3/Ccn1/Igfbp7/Col5a2/Mmp2/Comp/Runx1/Col1a2/Loxl1/Col1a1/Lgals3/S100a6/Ctsb/Hspg2/Col8a2/Gsto1/Wnt5a/Fgl2/Fbln1/Thbs2/Gpc1/Col4a1/Ltbp4/Ccdc80/Serpine2
TM_CC_GO:0031091	TM	CC	GO:0031091	platelet alpha granule	TM	4/369	14/16013	0.000231232	0.00356268	0.0032093	21825/20692/20720/21826	4	4	0.663978	Active	1.45281	0.0778666	0.647266	0.612175	129	tags=100%, list=34%, signal=66%	Thbs1/Thbs2/Serpine2/Sparc
TM_CC_GO:0042788	TM	CC	GO:0042788	polysomal ribosome	TM	5/369	28/16013	0.000401501	0.00538789	0.00485347	67671/19988/19921/67248/26961	5	5	0.412399	Active	0.978271	0.47948	0.863273	0.816472	223	tags=100%, list=59%, signal=41%	Rpl6/Rpl38/Rpl39/Rpl8/Rpl19
TM_CC_GO:0043209	TM	CC	GO:0043209	myelin sheath	All	24/369	202/16013	4.71e-11	4.9e-09	4.42e-09	22187/268373/12955/11739/16832/12313/12709/23980/98660/14433/17967/12315/14862/14645/14693/11949/21881/12314/68585/11674/22334/18103/22142/14873	24	24	-0.446541	Suppressed	-2.03206	0.00341476	0.0825752	0.0780984	157	tags=79%, list=42%, signal=49%	Aldoa/Ppia/Gnb2/Tkt/Rtn4/Atp5c1/Calm3/Glul/Calm1/Gstm1/Gapdh/Pebp1/Ncam1/Slc25a4/Atp1a2/Ldhb/Ckb/Cryab/Ubb
TM_CC_GO:0044391	TM	CC	GO:0044391	ribosomal subunit	All	19/369	184/16013	5.15e-08	3.57e-06	3.22e-06	20005/67671/270106/19988/20103/20102/19921/20085/67248/121022/56040/100038882/20084/26961/64658/68565/68836/18148/27367	19	19	-0.285714	Suppressed	-1.19556	0.237005	0.740976	0.700805	275	tags=100%, list=73%, signal=28%	Rplp1/Rpl6/Rpl38/Rpl39/Npm1/Rpl8/Rps18/Mrps18a/Rpl3/Mrps25/Rpl19/Rps4x/Rpl13/Mrps6/Rps19/Rps5/Rpl9/Isg15
TM_CC_GO:0045121	TM	CC	GO:0045121	membrane raft	TM	20/369	359/16013	0.000262645	0.00390215	0.00351509	19734/11739/16832/57320/56188/98660/12215/19225/67916/14683/22334/12876/14726/13030/22142/22146/14733/240725/20971/11826	20	20	-0.223166	Suppressed	-0.950987	0.511364	0.868619	0.821527	87	tags=40%, list=23%, signal=32%	Plpp3/Fxyd1/Bsg/Slc25a4/Park7/Atp1a2/Ldhb/Rgs16
TM_CC_GO:0045271	TM	CC	GO:0045271	respiratory chain complex I	TM	8/369	41/16013	3.62e-06	7.53e-05	6.79e-05	67264/75406/68342/66916/69875/68197/66218/68375	8	8	-0.421026	Suppressed	-1.25423	0.210826	0.727291	0.687861	185	tags=88%, list=49%, signal=45%	Ndufc2/Ndufb9/Ndufa11/Ndufs7/Ndufb10/Ndufb7/Ndufb8
TM_CC_GO:0062023	TM	CC	GO:0062023	collagen-containing extracellular matrix	All	53/369	338/16013	4.28e-29	5.94e-27	5.35e-27	12111/29817/12825/21825/13717/21859/20200/14268/16997/12816/18073/16007/12842/12837/21923/16948/66695/12843/20692/50706/71660/21857/19242/17313/320712/14264/237759/14734/20657/18845/12832/11504/16949/20720/116847/16854/14114/12394/20195/13030/17022/14733/15530/21826/108075/14190/329941/13179/14873/67896/12826/12845/18295	53	53	0.599711	Active	2.99137	0.000146391	0.00649002	0.00613817	112	tags=74%, list=30%, signal=60%	Fn1/Col3a1/Thbs1/Timp1/Eln/Col8a1/Bgn/Ltbp2/Aspn/Tnc/Fmod/Lox/Postn/Col12a1/Sod3/Prelp/Timp3/Ccn1/Igfbp7/Col5a2/Comp/Runx1/Col1a2/Loxl1/Col1a1/Lgals3/S100a6/Ctsb/Hspg2/Col8a2/Gsto1/Fgl2/Fbln1/Thbs2/Gpc1/Col4a1/Ltbp4/Ccdc80/Serpine2
TM_CC_GO:0070469	TM	CC	GO:0070469	respirasome	TM	12/369	73/16013	9.74e-08	4.62e-06	4.17e-06	67264/75406/68342/66916/69875/12857/68197/66218/67680/66594/68375/407790	12	12	-0.379121	Suppressed	-1.3329	0.144013	0.724812	0.685516	239	tags=100%, list=64%, signal=38%	Ndufa8/Ndufa4l2/Sdhb/Ndufc2/Ndufb9/Cox4i1/Ndufa11/Ndufs7/Ndufb10/Ndufb7/Ndufb8
TM_CC_GO:0098643	TM	CC	GO:0098643	banded collagen fibril	TM	5/369	11/16013	2.61e-06	6.38e-05	5.75e-05	12825/12842/12843/12832/17022	5	5	0.714318	Active	1.69447	0.0177721	0.315158	0.298072	74	tags=80%, list=20%, signal=65%	Col3a1/Col5a2/Col1a2/Col1a1
TM_CC_GO:0098644	TM	CC	GO:0098644	complex of collagen trimers	TM	6/369	17/16013	1.44e-06	4.59e-05	4.14e-05	12825/12842/12843/12832/17022/12826	6	6	0.652085	Active	1.65883	0.025776	0.403319	0.381453	102	tags=83%, list=27%, signal=62%	Col3a1/Col5a2/Col1a2/Col1a1/Col4a1
TM_CC_GO:0098798	TM	CC	GO:0098798	mitochondrial protein-containing complex	TM	19/369	245/16013	4.22e-06	7.98e-05	7.19e-05	121022/67264/75406/68342/66916/69875/12857/68197/110826/66218/11949/64658/67680/228033/68565/68836/15108/68375/407790	19	19	-0.301592	Suppressed	-1.262	0.18631	0.727291	0.687861	245	tags=95%, list=65%, signal=35%	Hsd17b10/Ndufa8/Ndufa4l2/Mrps18a/Atp5g3/Mrps25/Sdhb/Ndufc2/Ndufb9/Cox4i1/Etfb/Ndufa11/Atp5c1/Ndufs7/Ndufb10/Ndufb7/Mrps6/Ndufb8
TM_CC_GO:0098800	TM	CC	GO:0098800	inner mitochondrial membrane protein complex	TM2_TM3	13/369	115/16013	2.45e-06	6.38e-05	5.75e-05	67264/75406/68342/66916/69875/12857/68197/66218/11949/67680/228033/68375/407790	13	13	-0.38292	Suppressed	-1.3916	0.112751	0.724812	0.685516	238	tags=100%, list=63%, signal=38%	Ndufa4l2/Atp5g3/Sdhb/Ndufc2/Ndufb9/Cox4i1/Ndufa11/Atp5c1/Ndufs7/Ndufb10/Ndufb7/Ndufb8
TM_CC_GO:0098803	TM	CC	GO:0098803	respiratory chain complex	TM	11/369	66/16013	2.89e-07	1.2e-05	1.08e-05	67264/75406/68342/66916/69875/12857/68197/66218/67680/68375/407790	11	11	-0.380822	Suppressed	-1.28822	0.177116	0.724812	0.685516	238	tags=100%, list=63%, signal=38%	Ndufa4l2/Sdhb/Ndufc2/Ndufb9/Cox4i1/Ndufa11/Ndufs7/Ndufb10/Ndufb7/Ndufb8
TM_CC_GO:0098857	TM	CC	GO:0098857	membrane microdomain	TM	20/369	360/16013	0.000272336	0.00390662	0.00351912	19734/11739/16832/57320/56188/98660/12215/19225/67916/14683/22334/12876/14726/13030/22142/22146/14733/240725/20971/11826	20	20	-0.223166	Suppressed	-0.950987	0.511364	0.868619	0.821527	87	tags=40%, list=23%, signal=32%	Plpp3/Fxyd1/Bsg/Slc25a4/Park7/Atp1a2/Ldhb/Rgs16
TM_CC_GO:1990204	TM	CC	GO:1990204	oxidoreductase complex	TM	12/369	96/16013	2.06e-06	6.11e-05	5.5e-05	67264/75406/68342/66916/69875/68197/110826/66218/13057/67680/68375/18453	12	12	-0.331912	Suppressed	-1.16693	0.268984	0.741109	0.70093	194	tags=83%, list=52%, signal=42%	Sdhb/Ndufc2/Ndufb9/Cyba/Etfb/Ndufa11/Ndufs7/Ndufb10/Ndufb7/Ndufb8
TM_MF_GO:0001968	TM	MF	GO:0001968	fibronectin binding	All	9/355	32/15758	2.4e-08	2.31e-06	2e-06	14219/21825/16011/21923/17390/14114/67896/12845/20971	9	9	0.724796	Active	2.11231	0.00105671	0.0724306	0.0634503	110	tags=100%, list=29%, signal=72%	Thbs1/Ccn2/Tnc/Igfbp5/Mmp2/Comp/Sdc4/Fbln1/Ccdc80
TM_MF_GO:0002020	TM	MF	GO:0002020	protease binding	TM	12/355	134/15758	5.09e-05	0.0015448	0.00134147	12825/21859/14268/16971/57320/12842/12843/75406/21857/11674/15530/12845	12	12	0.648097	Active	2.08875	0.00121528	0.0724306	0.0634503	85	tags=75%, list=23%, signal=60%	Fn1/Col3a1/Timp1/Timp3/Lrp1/Comp/Col1a2/Col1a1/Hspg2
TM_MF_GO:0003735	TM	MF	GO:0003735	structural constituent of ribosome	All	17/355	150/15758	4.81e-08	3.08e-06	2.68e-06	20005/67671/270106/19988/20103/20102/19921/20085/67248/121022/56040/20084/26961/64658/68565/68836/27367	17	17	-0.284123	Suppressed	-1.14216	0.293187	0.693419	0.607446	275	tags=100%, list=73%, signal=28%	Rplp1/Rpl6/Rpl38/Rpl39/Rpl8/Rps18/Mrps18a/Rpl3/Mrps25/Rpl19/Rps4x/Rpl13/Mrps6/Rps19/Rps5/Rpl9
TM_MF_GO:0004601	TM	MF	GO:0004601	peroxidase activity	TM	6/355	42/15758	0.000331369	0.0086909	0.00754696	14871/53381/19225/14778/66447/11758	6	6	0.47158	Active	1.18258	0.269646	0.692712	0.606827	36	tags=33%, list=10%, signal=31%	Gpx3/Ptgs2
TM_MF_GO:0004857	TM	MF	GO:0004857	enzyme inhibitor activity	TM	18/355	315/15758	0.000297055	0.00816193	0.00708762	100034684/18245/21859/20716/15507/23980/14433/12577/21857/19242/56455/69550/14734/18148/12703/20720/66849/74116	18	18	0.33544	Active	1.2331	0.224237	0.635082	0.556341	37	tags=22%, list=10%, signal=21%	Cstdc5/Serpina3n/Timp1/Timp3
TM_MF_GO:0005178	TM	MF	GO:0005178	integrin binding	All	16/355	131/15758	4.15e-08	2.99e-06	2.6e-06	14219/12825/21825/14268/268373/20750/16007/22403/20315/19242/12520/100038882/67916/14114/18453/12845	16	16	0.469135	Active	1.66624	0.0300726	0.224216	0.196417	50	tags=44%, list=13%, signal=40%	Fn1/Col3a1/Thbs1/Ccn2/Ccn5/Ccn1/Comp
TM_MF_GO:0005201	TM	MF	GO:0005201	extracellular matrix structural constituent	All	29/355	129/15758	4.26e-21	2.46e-18	2.13e-18	12111/29817/12825/21825/13717/14268/16997/12816/18073/12842/12837/21923/66695/12843/20692/50706/320712/237759/12832/116847/14114/17022/15530/108075/329941/13179/12826/12845/18295	29	29	0.609404	Active	2.60223	0.000158554	0.0249832	0.0218857	106	tags=76%, list=28%, signal=59%	Fn1/Col3a1/Thbs1/Eln/Col8a1/Bgn/Ltbp2/Aspn/Tnc/Postn/Col12a1/Prelp/Igfbp7/Col5a2/Comp/Col1a2/Col1a1/Hspg2/Col8a2/Fbln1/Col4a1/Ltbp4
TM_MF_GO:0005518	TM	MF	GO:0005518	collagen binding	TM1_TM2	12/355	68/15758	3.33e-08	2.74e-06	2.38e-06	21825/18073/11568/16948/66695/20692/320712/13030/17022/14733/13179/12845	12	12	0.434005	Active	1.39875	0.122917	0.511468	0.448054	52	tags=42%, list=14%, signal=37%	Thbs1/Aspn/Lox/Comp/Aebp1
TM_MF_GO:0005520	TM	MF	GO:0005520	insulin-like growth factor binding	TM2_TM3	7/355	27/15758	1.67e-06	6.03e-05	5.23e-05	29817/14219/16011/16007/22403/16010/16008	7	7	0.799458	Active	2.12207	0.000718649	0.0713858	0.0625351	81	tags=100%, list=22%, signal=80%	Ccn2/Ccn5/Igfbp5/Ccn1/Igfbp7/Igfbp4/Igfbp2
TM_MF_GO:0005539	TM	MF	GO:0005539	glycosaminoglycan binding	All	29/355	188/15758	2.2e-16	6.35e-14	5.52e-14	12111/17242/14219/21825/14268/268373/16997/14314/15945/16007/11816/50706/22403/17967/18187/19242/320712/22240/237759/16976/11504/72780/20720/116847/240725/21826/13179/67896/12845	29	29	0.418259	Active	1.78602	0.011733	0.129401	0.113357	50	tags=38%, list=13%, signal=36%	Fn1/Thbs1/Ccn2/Bgn/Ltbp2/Fstl1/Postn/Ccn5/Prelp/Ccn1/Comp
TM_MF_GO:0008201	TM	MF	GO:0008201	heparin binding	All	24/355	143/15758	1.31e-14	2.53e-12	2.2e-12	17242/14219/21825/14268/16997/14314/15945/16007/11816/50706/22403/17967/18187/19242/320712/237759/16976/11504/72780/20720/116847/21826/67896/12845	24	24	0.449462	Active	1.80817	0.00961069	0.129401	0.113357	50	tags=42%, list=13%, signal=39%	Fn1/Thbs1/Ccn2/Ltbp2/Fstl1/Postn/Ccn5/Prelp/Ccn1/Comp
TM_MF_GO:0009055	TM	MF	GO:0009055	electron transfer activity	TM	11/355	75/15758	8.77e-07	3.61e-05	3.14e-05	109672/67264/75406/66916/12857/68197/110826/13057/67680/66594/407790	11	11	-0.378082	Suppressed	-1.28052	0.181797	0.601949	0.527317	239	tags=100%, list=64%, signal=38%	Ndufa4l2/Sdhb/Ndufc2/Cyba/Cox4i1/Etfb/Ndufs7/Ndufb7/Ndufb8/Cyb5a
TM_MF_GO:0016209	TM	MF	GO:0016209	antioxidant activity	TM	11/355	67/15758	2.7e-07	1.42e-05	1.23e-05	57320/11816/14871/53381/19225/20657/14778/70564/66447/11758/14873	11	11	0.370831	Active	1.15974	0.292915	0.693419	0.607446	36	tags=27%, list=10%, signal=25%	Gpx3/Sod3/Ptgs2
TM_MF_GO:0016684	TM	MF	GO:0016684	oxidoreductase activity, acting on peroxide as acceptor	TM	7/355	46/15758	6.97e-05	0.00201186	0.00174705	57320/14871/53381/19225/14778/66447/11758	7	7	0.397128	Active	1.05413	0.393101	0.747919	0.655188	36	tags=29%, list=10%, signal=26%	Gpx3/Ptgs2
TM_MF_GO:0019838	TM	MF	GO:0019838	growth factor binding	All	19/355	135/15758	1.88e-10	2.18e-08	1.89e-08	29817/14219/12825/21825/16011/16997/20085/16007/12842/12843/22403/19242/16010/16008/18414/14733/18595/108075/12826	19	19	0.676259	Active	2.53096	0.000167673	0.0249832	0.0218857	106	tags=89%, list=28%, signal=68%	Col3a1/Thbs1/Ccn2/Ltbp2/Ccn5/Igfbp5/Ccn1/Igfbp7/Igfbp4/Col1a2/Osmr/Col1a1/Pdgfra/Igfbp2/Gpc1/Col4a1/Ltbp4
TM_MF_GO:0019843	TM	MF	GO:0019843	rRNA binding	TM1_TM2	11/355	70/15758	4.28e-07	2.06e-05	1.79e-05	20005/19988/20103/20102/19921/121022/20084/26961/68565/18148/27367	11	11	-0.331507	Suppressed	-1.12277	0.30922	0.701176	0.614241	256	tags=100%, list=68%, signal=33%	Npm1/Rpl8/Rps18/Mrps18a/Rpl3/Rpl19/Rps4x/Mrps6/Rps5/Rpl9
TM_MF_GO:0030020	TM	MF	GO:0030020	extracellular matrix structural constituent conferring tensile strength	TM	8/355	37/15758	1.34e-06	5.15e-05	4.47e-05	12825/12816/12842/12837/12843/237759/12832/12826	8	8	0.669784	Active	1.86666	0.00815748	0.129401	0.113357	102	tags=88%, list=27%, signal=65%	Col3a1/Col8a1/Col12a1/Col5a2/Col1a2/Col1a1/Col4a1
TM_MF_GO:0043394	TM	MF	GO:0043394	proteoglycan binding	TM	7/355	37/15758	1.6e-05	0.000511712	0.000444358	14268/18073/21923/11816/19242/13030/12845	7	7	0.437734	Active	1.16192	0.290873	0.693419	0.607446	83	tags=57%, list=22%, signal=45%	Fn1/Tnc/Comp/Ctsb
TM_MF_GO:0048407	TM	MF	GO:0048407	platelet-derived growth factor binding	TM	5/355	12/15758	3.92e-06	0.000133152	0.000115626	12825/12842/12843/18595/12826	5	5	0.738544	Active	1.73199	0.0134612	0.129401	0.113357	102	tags=100%, list=27%, signal=74%	Col3a1/Col1a2/Col1a1/Pdgfra/Col4a1
TM_MF_GO:0050839	TM	MF	GO:0050839	cell adhesion molecule binding	All	22/355	271/15758	2.27e-07	1.31e-05	1.14e-05	14219/12825/21825/14268/268373/17470/20750/19266/16007/50706/22403/20315/12215/19242/12520/100038882/67916/68585/12876/14114/18453/12845	22	22	0.457996	Active	1.79838	0.0112911	0.129401	0.113357	50	tags=41%, list=13%, signal=38%	Fn1/Col3a1/Thbs1/Ccn2/Cd200/Postn/Ccn5/Ccn1/Comp
TM_MF_GO:0050840	TM	MF	GO:0050840	extracellular matrix binding	All	10/355	58/15758	5.92e-07	2.63e-05	2.28e-05	12111/21825/13717/20750/18073/16007/20692/16854/14733/13179	10	10	0.43365	Active	1.31189	0.17568	0.588233	0.515301	42	tags=40%, list=11%, signal=37%	Thbs1/Eln/Bgn/Ccn1
TM_MF_GO:1901681	TM	MF	GO:1901681	sulfur compound binding	All	29/355	238/15758	1.22e-13	1.76e-11	1.53e-11	17242/14219/21825/14268/268373/16997/14314/15945/16007/11816/50706/22403/17967/18187/19242/14862/320712/22240/21881/237759/16976/11504/72780/20720/116847/21826/67896/12845/21366	29	29	0.387244	Active	1.65358	0.0280641	0.224216	0.196417	62	tags=38%, list=16%, signal=34%	Fn1/Thbs1/Ccn2/Ltbp2/Fstl1/Postn/Ccn5/Prelp/Ccn1/Comp/Dpysl3
TM1_BP_GO:0001503	TM1	BP	GO:0001503	ossification	TM1	26/297	365/15888	5.56e-09	5.04e-06	4.28e-06	14219/16477/19242/16478/17242/16011/15903/11732/14362/17390/20377/17926/15081/16948/19225/15904/16002/14734/21833/15078/12609/66695/12843/381629/15902/72007	26	26	0.321568	Active	1.27892	0.182732	0.543516	0.482611	42	tags=31%, list=13%, signal=29%	Ccn2/Igfbp5/Ptgs2/Lox/Ank/Mmp2/Fzd1/Aspn
TM1_BP_GO:0001649	TM1	BP	GO:0001649	osteoblast differentiation	TM1	16/297	194/15888	7.61e-07	0.000460395	0.00039072	16477/16478/16011/15903/14362/20377/17926/15081/16948/15904/16002/15078/12609/381629/15902/72007	16	16	-0.260184	Suppressed	-0.987907	0.460792	0.756925	0.672105	43	tags=31%, list=14%, signal=28%	Junb/Sfrp1/Jund/Id3/Myoc
TM1_BP_GO:0002181	TM1	BP	GO:0002181	cytoplasmic translation	TM1_TM2	9/297	85/15888	2.93e-05	0.00759386	0.00644463	20005/19921/57808/26961/68028/66475/66480/67248/67204	9	9	-0.226974	Suppressed	-0.692444	0.833791	0.918962	0.815984	245	tags=100%, list=78%, signal=22%	Rpl39/Rps23/Rpl35a/Rpl15/Rpl22l1/Rpl8/Rpl19/Rpl9
TM1_BP_GO:0006979	TM1	BP	GO:0006979	response to oxidative stress	TM1	22/297	381/15888	3.03e-06	0.00137455	0.00116653	11816/14004/21825/14281/16819/53381/20657/12955/14778/16476/27050/15507/14362/17390/57320/268373/19225/11758/19823/12350/56338/18595	22	22	0.410758	Active	1.5563	0.0550725	0.338623	0.300677	38	tags=36%, list=12%, signal=34%	Lcn2/Gpx3/Sod3/Ptgs2/Pdgfra/Mmp2/Thbs1/Fzd1
TM1_BP_GO:0007565	TM1	BP	GO:0007565	female pregnancy	TM1	10/297	109/15888	3.73e-05	0.00846905	0.00718737	16477/19242/21857/16011/17390/15081/19225/67968/80884/232345	10	10	0.576989	Active	1.69764	0.0244503	0.241553	0.214485	31	tags=50%, list=10%, signal=47%	Timp1/Igfbp5/Ptgs2/Ooep/Mmp2
TM1_BP_GO:0009611	TM1	BP	GO:0009611	response to wounding	TM1	22/297	435/15888	2.44e-05	0.00759386	0.00644463	11816/14268/67916/16971/21825/19242/17938/18039/16476/21923/12825/17242/21857/17390/268373/16948/13052/68169/22695/18213/107589/18595	22	22	0.451136	Active	1.70929	0.0217391	0.231327	0.205405	37	tags=41%, list=12%, signal=39%	Timp1/Fn1/Col3a1/Tnc/Lox/Pdgfra/Mmp2/Lrp1/Thbs1
TM1_BP_GO:0010001	TM1	BP	GO:0010001	glial cell differentiation	TM1	15/297	229/15888	2.76e-05	0.00759386	0.00644463	12759/67916/16971/19242/17242/17926/15205/15904/18858/22352/18213/12558/15902/14733/19744	15	15	-0.297421	Suppressed	-1.10476	0.329638	0.68378	0.607156	17	tags=27%, list=5%, signal=26%	Mdk/Plpp3/Ptn/Myoc
TM1_BP_GO:0018149	TM1	BP	GO:0018149	peptide cross-linking	TM1_TM2	7/297	23/15888	1.41e-07	0.000102292	8.68e-05	13179/14268/12111/21825/12825/68169/94214	7	7	0.57253	Active	1.49142	0.0768527	0.394406	0.35021	43	tags=57%, list=14%, signal=50%	Fn1/Col3a1/Thbs1/Bgn
TM1_BP_GO:0030198	TM1	BP	GO:0030198	extracellular matrix organization	TM1	29/297	282/15888	8.33e-14	1.1e-10	9.37e-11	14268/14219/12837/53381/320712/13717/12825/54156/17390/16948/17022/50706/18858/12832/94216/68169/77739/12818/11568/240725/12843/80883/23794/16854/78892/18595/94214/57764/241327	29	29	0.509783	Active	2.08669	0.0018573	0.110089	0.0977527	58	tags=48%, list=19%, signal=43%	Ccn2/Col8a1/Fn1/Col3a1/Eln/Lox/Pdgfra/Mmp2/Lgals3/Col5a2/Postn/Adamts5/Sulf1/Crispld2
TM1_BP_GO:0031103	TM1	BP	GO:0031103	axon regeneration	TM1	7/297	51/15888	4.25e-05	0.00857217	0.00727488	16971/19242/18039/16476/21923/17390/18213	7	7	0.412914	Active	1.07563	0.375114	0.719273	0.638672	36	tags=43%, list=12%, signal=39%	Tnc/Mmp2/Lrp1
TM1_BP_GO:0031589	TM1	BP	GO:0031589	cell-substrate adhesion	TM1	19/297	339/15888	2.19e-05	0.00759386	0.00644463	14268/14219/16971/21825/19242/12837/320712/12825/17242/54156/20377/17926/11932/50706/68169/80883/94214/57764/72007	19	19	0.365751	Active	1.32893	0.156953	0.521027	0.462642	47	tags=37%, list=15%, signal=33%	Ccn2/Col8a1/Fn1/Col3a1/Lrp1/Thbs1/Postn
TM1_BP_GO:0036376	TM1	BP	GO:0036376	sodium ion export across plasma membrane	TM1	4/297	11/15888	3.56e-05	0.00846905	0.00718737	11931/98660/11932/56188	4	4	-0.504854	Suppressed	-1.11412	0.327917	0.68378	0.607156	158	tags=100%, list=50%, signal=50%	Atp1b2/Atp1a2/Atp1b1
TM1_BP_GO:0042063	TM1	BP	GO:0042063	gliogenesis	TM1	18/297	315/15888	2.8e-05	0.00759386	0.00644463	12759/14268/67916/16971/19242/17242/13167/17926/15205/11932/15904/18858/22352/18213/12558/15902/14733/19744	18	18	-0.238916	Suppressed	-0.951699	0.519032	0.782255	0.694597	17	tags=17%, list=5%, signal=17%	Plpp3/Ptn/Myoc
TM1_BP_GO:0043062	TM1	BP	GO:0043062	extracellular structure organization	TM1	29/297	283/15888	9.13e-14	1.1e-10	9.37e-11	14268/14219/12837/53381/320712/13717/12825/54156/17390/16948/17022/50706/18858/12832/94216/68169/77739/12818/11568/240725/12843/80883/23794/16854/78892/18595/94214/57764/241327	29	29	0.509783	Active	2.08669	0.0018573	0.110089	0.0977527	58	tags=48%, list=19%, signal=43%	Ccn2/Col8a1/Fn1/Col3a1/Eln/Lox/Pdgfra/Mmp2/Lgals3/Col5a2/Postn/Adamts5/Sulf1/Crispld2
TM1_BP_GO:0045229	TM1	BP	GO:0045229	external encapsulating structure organization	TM1	29/297	283/15888	9.13e-14	1.1e-10	9.37e-11	14268/14219/12837/53381/320712/13717/12825/54156/17390/16948/17022/50706/18858/12832/94216/68169/77739/12818/11568/240725/12843/80883/23794/16854/78892/18595/94214/57764/241327	29	29	0.509783	Active	2.08669	0.0018573	0.110089	0.0977527	58	tags=48%, list=19%, signal=43%	Ccn2/Col8a1/Fn1/Col3a1/Eln/Lox/Pdgfra/Mmp2/Lgals3/Col5a2/Postn/Adamts5/Sulf1/Crispld2
TM1_BP_GO:0060537	TM1	BP	GO:0060537	muscle tissue development	TM1	21/297	418/15888	4.12e-05	0.00857217	0.00727488	14281/17938/13717/12825/16011/17967/99929/11739/12301/16948/13052/12227/16002/18858/56312/12818/107589/225115/15902/18595/14733	21	21	0.327461	Active	1.22381	0.224113	0.590791	0.524587	28	tags=24%, list=9%, signal=23%	Col3a1/Eln/Igfbp5/Lox/Pdgfra
TM1_BP_GO:1905906	TM1	BP	GO:1905906	regulation of amyloid fibril formation	TM1	5/297	14/15888	3.85e-06	0.00155114	0.0013164	11816/12759/12955/56612/18637	5	5	-0.555687	Suppressed	-1.34361	0.142068	0.498375	0.442528	54	tags=60%, list=17%, signal=50%	Pfdn5/Cryab/Apoe
TM1_BP_GO:1905907	TM1	BP	GO:1905907	negative regulation of amyloid fibril formation	TM1	5/297	11/15888	9.3e-07	0.000481985	0.000409042	11816/12759/12955/56612/18637	5	5	-0.555687	Suppressed	-1.34361	0.142068	0.498375	0.442528	54	tags=60%, list=17%, signal=50%	Pfdn5/Cryab/Apoe
TM1_CC_GO:0005581	TM1	CC	GO:0005581	collagen trimer	TM1	10/306	72/16013	1.05e-06	4.31e-05	3.8e-05	13179/12837/12825/12816/16948/17022/12832/94216/12818/12843	10	10	0.432394	Active	1.27018	0.200569	0.640833	0.610317	76	tags=60%, list=24%, signal=47%	Col8a1/Col3a1/Lox/Col5a2/Col12a1/Col1a2
TM1_CC_GO:0005583	TM1	CC	GO:0005583	fibrillar collagen trimer	TM1	4/306	11/16013	3.88e-05	0.000892699	0.000786474	12825/17022/12832/12843	4	4	0.577582	Active	1.22941	0.220362	0.640833	0.610317	76	tags=75%, list=24%, signal=58%	Col3a1/Col5a2/Col1a2
TM1_CC_GO:0005604	TM1	CC	GO:0005604	basement membrane	TM1_TM2	12/306	113/16013	1.69e-06	6.21e-05	5.47e-05	14268/21859/19242/12837/21923/21857/54156/545370/18858/94216/80883/57764	12	12	0.548051	Active	1.72193	0.0224623	0.345919	0.329447	30	tags=42%, list=10%, signal=39%	Timp1/Col8a1/Fn1/Tnc/Timp3
TM1_CC_GO:0005840	TM1	CC	GO:0005840	ribosome	TM1_TM2	21/306	214/16013	9.03e-10	5.54e-08	4.88e-08	20005/20102/20103/270106/20091/20085/19921/19981/57808/27050/121022/19933/20084/26961/68028/66475/66480/27367/67115/67248/18148	21	21	-0.280173	Suppressed	-1.17341	0.257501	0.646551	0.615762	200	tags=86%, list=64%, signal=33%	Rpl35a/Rpl15/Rpl22l1/Npm1/Rpl21/Rps18/Rpl8/Rpl37a/Rpl3/Rps3/Rpl19/Rps3a1/Rpl13/Rps19/Rps4x/Mrps6/Rpl9/Rps5
TM1_CC_GO:0005844	TM1	CC	GO:0005844	polysome	TM1	7/306	66/16013	0.000257752	0.00557957	0.00491564	20102/19921/27050/26961/22352/66475/67248	7	7	-0.218954	Suppressed	-0.600443	0.922501	0.964243	0.918327	247	tags=100%, list=79%, signal=22%	Rpl39/Rps23/Rpl8/Rps3/Rpl19/Rps4x
TM1_CC_GO:0015934	TM1	CC	GO:0015934	large ribosomal subunit	TM1_TM2	12/306	114/16013	1.86e-06	6.21e-05	5.47e-05	20005/270106/19921/19981/57808/19933/26961/66480/27367/67115/67248/18148	12	12	-0.252492	Suppressed	-0.857922	0.641419	0.920297	0.876473	238	tags=100%, list=76%, signal=25%	Rpl14/Rpl35a/Rpl15/Npm1/Rpl21/Rpl8/Rpl37a/Rpl3/Rpl19/Rpl13/Rpl9
TM1_CC_GO:0015935	TM1	CC	GO:0015935	small ribosomal subunit	TM1_TM2	9/306	75/16013	1.26e-05	0.000357755	0.000315184	20102/20103/20091/20085/27050/121022/20084/66475/18148	9	9	-0.432547	Suppressed	-1.30451	0.173488	0.640833	0.610317	109	tags=67%, list=35%, signal=45%	Rps3/Rps3a1/Rps19/Rps4x/Mrps6/Rps5
TM1_CC_GO:0022625	TM1	CC	GO:0022625	cytosolic large ribosomal subunit	All	11/306	55/16013	5.87e-09	3.09e-07	2.72e-07	20005/270106/19921/19981/57808/19933/26961/66480/27367/67115/67248	11	11	-0.251656	Suppressed	-0.827455	0.677986	0.932688	0.888274	238	tags=100%, list=76%, signal=25%	Rpl14/Rpl35a/Rpl15/Rpl21/Rpl8/Rpl37a/Rpl3/Rpl19/Rpl13/Rpl9
TM1_CC_GO:0022626	TM1	CC	GO:0022626	cytosolic ribosome	All	18/306	103/16013	8.9e-13	8.19e-11	7.22e-11	20005/20102/20103/270106/20091/20085/19921/19981/57808/27050/19933/20084/26961/66475/66480/27367/67115/67248	18	18	-0.260053	Suppressed	-1.03532	0.415998	0.762663	0.726346	225	tags=94%, list=72%, signal=28%	Rps23/Rpl14/Rpl35a/Rpl15/Rpl21/Rps18/Rpl8/Rpl37a/Rpl3/Rps3/Rpl19/Rps3a1/Rpl13/Rps19/Rps4x/Rpl9/Rps5
TM1_CC_GO:0022627	TM1	CC	GO:0022627	cytosolic small ribosomal subunit	TM1_TM2	7/306	45/16013	2.11e-05	0.000555906	0.000489757	20102/20103/20091/20085/27050/20084/66475	7	7	-0.46724	Suppressed	-1.28132	0.187583	0.640833	0.610317	109	tags=71%, list=35%, signal=48%	Rps3/Rps3a1/Rps19/Rps4x/Rps5
TM1_CC_GO:0030312	TM1	CC	GO:0030312	external encapsulating structure	All	53/306	447/16013	3.92e-27	7.21e-25	6.35e-25	13179/11816/14268/12111/21859/14219/29817/21825/19242/12837/20657/320712/13717/21923/20200/12825/21857/16997/54156/12816/17390/116847/20377/17926/22403/16948/17022/18845/545370/16002/14734/50706/18858/12832/94216/68169/50530/77739/12818/20195/66695/71660/14264/12843/80883/23794/16854/78892/94214/57764/14733/241327/12643	53	53	0.511632	Active	2.39483	0.000143968	0.00569695	0.00542567	66	tags=55%, list=21%, signal=52%	Timp1/Ccn2/Sod3/Col8a1/Fn1/Col3a1/Tnc/Eln/Ccn5/Lox/Prelp/Timp3/Mmp2/Chad/Ltbp2/Thbs1/Igfbp7/Mfap5/Aspn/Bgn/Lgals3/Col5a2/Postn/Adamts5/Gpc1/Crispld2/Fmod/Col12a1/S100a11
TM1_CC_GO:0031012	TM1	CC	GO:0031012	extracellular matrix	All	53/306	446/16013	3.51e-27	7.21e-25	6.35e-25	13179/11816/14268/12111/21859/14219/29817/21825/19242/12837/20657/320712/13717/21923/20200/12825/21857/16997/54156/12816/17390/116847/20377/17926/22403/16948/17022/18845/545370/16002/14734/50706/18858/12832/94216/68169/50530/77739/12818/20195/66695/71660/14264/12843/80883/23794/16854/78892/94214/57764/14733/241327/12643	53	53	0.511632	Active	2.39483	0.000143968	0.00569695	0.00542567	66	tags=55%, list=21%, signal=52%	Timp1/Ccn2/Sod3/Col8a1/Fn1/Col3a1/Tnc/Eln/Ccn5/Lox/Prelp/Timp3/Mmp2/Chad/Ltbp2/Thbs1/Igfbp7/Mfap5/Aspn/Bgn/Lgals3/Col5a2/Postn/Adamts5/Gpc1/Crispld2/Fmod/Col12a1/S100a11
TM1_CC_GO:0043209	TM1	CC	GO:0043209	myelin sheath	All	17/306	202/16013	3.51e-07	1.61e-05	1.42e-05	22187/18040/18039/12955/11931/16832/17967/14645/11739/98660/268373/23980/17926/18858/12315/17449/21881	17	17	-0.584737	Suppressed	-2.28463	0.00024888	0.00821304	0.00782194	87	tags=71%, list=28%, signal=54%	Slc25a4/Pebp1/Glul/Ldhb/Atp1a2/Ubb/Ncam1/Atp1b1/Nefl/Cryab/Nefm/Myoc
TM1_CC_GO:0044391	TM1	CC	GO:0044391	ribosomal subunit	All	20/306	184/16013	3.75e-10	2.76e-08	2.43e-08	20005/20102/20103/270106/20091/20085/19921/19981/57808/27050/121022/19933/20084/26961/66475/66480/27367/67115/67248/18148	20	20	-0.274966	Suppressed	-1.13652	0.296477	0.69445	0.661381	200	tags=85%, list=64%, signal=33%	Rpl35a/Rpl15/Npm1/Rpl21/Rps18/Rpl8/Rpl37a/Rpl3/Rps3/Rpl19/Rps3a1/Rpl13/Rps19/Rps4x/Mrps6/Rpl9/Rps5
TM1_CC_GO:0062023	TM1	CC	GO:0062023	collagen-containing extracellular matrix	All	45/306	338/16013	3.38e-25	4.14e-23	3.65e-23	13179/14268/12111/21859/29817/21825/19242/12837/20657/320712/13717/21923/20200/12825/21857/16997/54156/12816/116847/20377/17926/16948/17022/18845/545370/16002/14734/50706/18858/12832/94216/50530/77739/12818/20195/66695/71660/14264/12843/80883/23794/16854/94214/57764/14733	45	45	0.49063	Active	2.22197	0.000147973	0.00569695	0.00542567	66	tags=53%, list=21%, signal=49%	Timp1/Sod3/Col8a1/Fn1/Col3a1/Tnc/Eln/Lox/Prelp/Timp3/Ltbp2/Thbs1/Igfbp7/Mfap5/Aspn/Bgn/Lgals3/Col5a2/Postn/Adamts5/Gpc1/Fmod/Col12a1/S100a11
TM1_CC_GO:0098643	TM1	CC	GO:0098643	banded collagen fibril	TM1	4/306	11/16013	3.88e-05	0.000892699	0.000786474	12825/17022/12832/12843	4	4	0.577582	Active	1.22941	0.220362	0.640833	0.610317	76	tags=75%, list=24%, signal=58%	Col3a1/Col5a2/Col1a2
TM1_CC_GO:0098644	TM1	CC	GO:0098644	complex of collagen trimers	TM1	5/306	17/16013	1.26e-05	0.000357755	0.000315184	12825/17022/12832/94216/12843	5	5	0.470984	Active	1.08811	0.363281	0.748182	0.712554	76	tags=60%, list=24%, signal=46%	Col3a1/Col5a2/Col1a2
TM1_MF_GO:0001540	TM1	MF	GO:0001540	amyloid-beta binding	TM1	7/292	62/15758	0.000143576	0.00524052	0.00478226	16432/11816/12759/12955/56612/18637/15108	7	7	-0.585683	Suppressed	-1.60707	0.0413885	0.318174	0.287269	14	tags=57%, list=4%, signal=56%	Pfdn5/Itm2b/Cryab/Apoe
TM1_MF_GO:0001968	TM1	MF	GO:0001968	fibronectin binding	All	6/292	32/15758	2.32e-05	0.000989084	0.000902594	14219/21825/21923/16011/17390/17926	6	6	0.705891	Active	1.73227	0.0171878	0.184544	0.166619	37	tags=83%, list=12%, signal=75%	Ccn2/Tnc/Igfbp5/Mmp2/Thbs1
TM1_MF_GO:0003735	TM1	MF	GO:0003735	structural constituent of ribosome	All	20/292	150/15758	4.96e-12	8.45e-10	7.71e-10	20005/20102/20103/270106/20091/20085/19921/19981/57808/27050/121022/19933/20084/26961/68028/66475/66480/27367/67115/67248	20	20	-0.274899	Suppressed	-1.12101	0.311197	0.598082	0.539988	200	tags=85%, list=64%, signal=33%	Rpl35a/Rpl15/Rpl22l1/Rpl21/Rps18/Rpl8/Rpl37a/Rpl3/Rps3/Rpl19/Rps3a1/Rpl13/Rps19/Rps4x/Mrps6/Rpl9/Rps5
TM1_MF_GO:0005178	TM1	MF	GO:0005178	integrin binding	All	11/292	131/15758	3.24e-05	0.00127461	0.00116316	14268/14219/67916/21825/19242/12825/12520/268373/22403/13052/16002	11	11	0.49552	Active	1.50121	0.0766002	0.365997	0.330447	37	tags=45%, list=12%, signal=42%	Ccn2/Fn1/Col3a1/Ccn5/Thbs1
TM1_MF_GO:0005201	TM1	MF	GO:0005201	extracellular matrix structural constituent	All	23/292	129/15758	1.76e-16	8.99e-14	8.2e-14	13179/14268/12111/29817/21825/12837/320712/13717/21923/12825/16997/12816/116847/17022/545370/50706/12832/94216/50530/12818/66695/12843/94214	23	23	0.60756	Active	2.30713	0.000323939	0.0755273	0.0681911	47	tags=61%, list=15%, signal=56%	Col8a1/Fn1/Col3a1/Tnc/Eln/Prelp/Ltbp2/Thbs1/Igfbp7/Mfap5/Aspn/Bgn/Col5a2/Postn
TM1_MF_GO:0005518	TM1	MF	GO:0005518	collagen binding	TM1_TM2	9/292	68/15758	4.31e-06	0.000207328	0.000189198	13179/21825/320712/18542/16948/17022/11568/66695/14733	9	9	0.339908	Active	0.962828	0.493849	0.811953	0.733086	72	tags=56%, list=23%, signal=44%	Lox/Thbs1/Aspn/Gpc1/Aebp1
TM1_MF_GO:0005539	TM1	MF	GO:0005539	glycosaminoglycan binding	All	23/292	188/15758	7.57e-13	1.93e-10	1.77e-10	13179/11816/14268/12111/14219/21825/19242/320712/17242/16997/14314/17967/18542/268373/116847/20377/22403/50706/68169/240725/23794/78892/94214	23	23	0.413108	Active	1.56872	0.0461613	0.330128	0.298061	58	tags=52%, list=19%, signal=46%	Ccn2/Fn1/Ccn5/Prelp/Fstl1/Ltbp2/Thbs1/Bgn/Postn/Adamts5/Sulf1/Crispld2
TM1_MF_GO:0008201	TM1	MF	GO:0008201	heparin binding	All	18/292	143/15758	1.57e-10	2e-08	1.83e-08	11816/14268/14219/21825/19242/320712/17242/16997/14314/17967/18542/116847/20377/22403/50706/68169/23794/78892	18	18	0.430591	Active	1.5241	0.0638157	0.341275	0.308126	58	tags=56%, list=19%, signal=48%	Ccn2/Fn1/Ccn5/Prelp/Fstl1/Ltbp2/Thbs1/Postn/Adamts5/Crispld2
TM1_MF_GO:0016209	TM1	MF	GO:0016209	antioxidant activity	TM1	7/292	67/15758	0.000234654	0.00749425	0.00683892	11816/53381/20657/14778/57320/19225/11758	7	7	0.479334	Active	1.24935	0.205338	0.505131	0.456066	22	tags=43%, list=7%, signal=41%	Gpx3/Sod3/Ptgs2
TM1_MF_GO:0019838	TM1	MF	GO:0019838	growth factor binding	All	15/292	135/15758	3.05e-08	2.22e-06	2.03e-06	14219/29817/21825/19242/20085/12825/16011/16997/22403/18213/12843/232345/18595/19252/14733	15	15	0.608678	Active	2.03615	0.0025385	0.0755273	0.0681911	78	tags=80%, list=25%, signal=63%	Ccn2/Col3a1/Igfbp5/Ccn5/Pdgfra/Ltbp2/Thbs1/Igfbp7/Gpc1/Dusp1/Col1a2/Ntrk3
TM1_MF_GO:0019843	TM1	MF	GO:0019843	rRNA binding	TM1_TM2	12/292	70/15758	5.34e-09	4.55e-07	4.15e-07	20005/20102/20103/19921/19981/27050/121022/20084/26961/12696/27367/18148	12	12	-0.45515	Suppressed	-1.53544	0.0593564	0.339574	0.30659	177	tags=100%, list=57%, signal=45%	Rps18/Rpl8/Rpl37a/Rpl3/Rps3/Cirbp/Rpl19/Rps4x/Mrps6/Rpl9/Rps5
TM1_MF_GO:0030020	TM1	MF	GO:0030020	extracellular matrix structural constituent conferring tensile strength	TM1	7/292	37/15758	4.46e-06	0.000207328	0.000189198	12837/12825/12816/12832/94216/12818/12843	7	7	0.570097	Active	1.48591	0.0777052	0.365997	0.330447	76	tags=71%, list=24%, signal=55%	Col8a1/Col3a1/Col5a2/Col12a1/Col1a2
TM1_MF_GO:0050839	TM1	MF	GO:0050839	cell adhesion molecule binding	All	19/292	271/15758	7.49e-07	4.25e-05	3.88e-05	14268/14219/67916/17470/12215/21825/19242/12825/12520/268373/22403/13052/16002/50706/13723/18301/80883/21872/12558	19	19	0.442849	Active	1.58992	0.043658	0.325451	0.293839	50	tags=42%, list=16%, signal=38%	Cd200/Ccn2/Fn1/Col3a1/Ccn5/Thbs1/Postn/Fxyd5
TM1_MF_GO:0050840	TM1	MF	GO:0050840	extracellular matrix binding	All	10/292	58/15758	9.74e-08	6.22e-06	5.68e-06	13179/12111/21825/13717/23794/16854/94214/57764/14733/241327	10	10	0.535213	Active	1.57326	0.0533357	0.339574	0.30659	56	tags=60%, list=18%, signal=51%	Eln/Thbs1/Bgn/Lgals3/Adamts5/Gpc1
TM1_MF_GO:0098632	TM1	MF	GO:0098632	cell-cell adhesion mediator activity	TM1	5/292	30/15758	0.000205713	0.00700797	0.00639516	17470/12215/13052/13723/80883	5	5	0.367396	Active	0.843384	0.654854	0.908311	0.820084	12	tags=20%, list=4%, signal=20%	Cd200
TM1_MF_GO:1901681	TM1	MF	GO:1901681	sulfur compound binding	All	21/292	238/15758	3.55e-09	3.63e-07	3.31e-07	11816/14268/14219/21825/19242/320712/17242/16997/14314/17967/18542/268373/116847/20377/13167/22403/50706/68169/23794/78892/21881	21	21	0.391181	Active	1.44719	0.0885086	0.375398	0.338935	58	tags=48%, list=19%, signal=42%	Ccn2/Fn1/Ccn5/Prelp/Fstl1/Ltbp2/Thbs1/Postn/Adamts5/Crispld2
TM2_BP_GO:0000028	TM2	BP	GO:0000028	ribosomal small subunit assembly	TM2	5/239	20/15888	9.52e-06	0.00151026	0.00123821	20103/67671/20085/16785/16898	5	5	-0.257162	Suppressed	-0.601349	0.923823	0.950342	0.917756	72	tags=100%, list=28%, signal=74%	Rps2/Rpsa/Rps19/Rps5
TM2_BP_GO:0001503	TM2	BP	GO:0001503	ossification	TM2	18/239	365/15888	1.08e-05	0.00151026	0.00123821	14734/20750/16477/12609/16478/67671/100038882/14683/15081/17242/16007/17926/68713/107250/22339/19242/381629/15902	18	18	-0.448124	Suppressed	-1.68073	0.0229522	0.506471	0.489105	55	tags=44%, list=21%, signal=38%	Jund/Junb/Cebpd/Ptn/Isg15/Gpc3/Myoc/Spp1
TM2_BP_GO:0001667	TM2	BP	GO:0001667	ameboidal-type cell migration	TM2	19/239	410/15888	1.47e-05	0.00171316	0.00140456	16476/11475/114886/83397/13616/21825/14645/14268/20692/14314/68792/13179/20315/22339/11826/11600/12215/11852/17311	19	19	0.375103	Active	1.36581	0.128259	0.58426	0.564227	45	tags=37%, list=17%, signal=33%	Acta2/Thbs1/Fn1/Srpx2/Fstl1/Aqp1/Sparc
TM2_BP_GO:0001935	TM2	BP	GO:0001935	endothelial cell proliferation	TM2	10/239	148/15888	8.17e-05	0.00701717	0.00575313	16476/18654/19378/21825/20292/17242/20692/20315/22339/13057	10	10	-0.428463	Suppressed	-1.29765	0.173762	0.588547	0.568367	29	tags=40%, list=11%, signal=37%	Jun/Aldh1a2/Pgf/Ccl11
TM2_BP_GO:0001936	TM2	BP	GO:0001936	regulation of endothelial cell proliferation	TM2	10/239	133/15888	3.29e-05	0.00315245	0.00258458	16476/18654/19378/21825/20292/17242/20692/20315/22339/13057	10	10	-0.428463	Suppressed	-1.29765	0.173762	0.588547	0.568367	29	tags=40%, list=11%, signal=37%	Jun/Aldh1a2/Pgf/Ccl11
TM2_BP_GO:0002181	TM2	BP	GO:0002181	cytoplasmic translation	TM1_TM2	8/239	85/15888	4.14e-05	0.00375014	0.00307461	20005/19921/67671/16785/16898/11837/26961/66481	8	8	0.284	Active	0.775014	0.722277	0.84724	0.818189	187	tags=100%, list=72%, signal=28%	Rpl38/Rps2/Rps21/Rplp0/Rpl8/Rpsa/Rpl19/Rpl9
TM2_BP_GO:0002685	TM2	BP	GO:0002685	regulation of leukocyte migration	TM2	13/239	207/15888	1.55e-05	0.00173107	0.00141924	15945/18654/71660/13616/21825/17874/17242/77125/20315/22339/19242/24047/17311	13	13	-0.46048	Suppressed	-1.52743	0.0593521	0.568985	0.549475	46	tags=46%, list=18%, signal=40%	Edn3/Myd88/Ptn/Rarres2/Pgf/Cxcl10
TM2_BP_GO:0002687	TM2	BP	GO:0002687	positive regulation of leukocyte migration	TM2	11/239	144/15888	1.14e-05	0.00153293	0.00125679	15945/18654/71660/13616/21825/17242/20315/22339/19242/24047/17311	11	11	-0.459522	Suppressed	-1.44377	0.0949549	0.568985	0.549475	46	tags=45%, list=18%, signal=39%	Edn3/Ptn/Rarres2/Pgf/Cxcl10
TM2_BP_GO:0002688	TM2	BP	GO:0002688	regulation of leukocyte chemotaxis	TM2	10/239	115/15888	9.21e-06	0.00151026	0.00123821	15945/18654/71660/13616/21825/17242/20315/22339/19242/24047	10	10	-0.486281	Suppressed	-1.47276	0.0798533	0.568985	0.549475	46	tags=50%, list=18%, signal=43%	Edn3/Ptn/Rarres2/Pgf/Cxcl10
TM2_BP_GO:0002690	TM2	BP	GO:0002690	positive regulation of leukocyte chemotaxis	TM2	10/239	90/15888	9.81e-07	0.000404826	0.000331903	15945/18654/71660/13616/21825/17242/20315/22339/19242/24047	10	10	-0.486281	Suppressed	-1.47276	0.0798533	0.568985	0.549475	46	tags=50%, list=18%, signal=43%	Edn3/Ptn/Rarres2/Pgf/Cxcl10
TM2_BP_GO:0006959	TM2	BP	GO:0006959	humoral immune response	TM2	12/239	153/15888	3.46e-06	0.00105541	0.000865291	15945/71660/20085/12268/20292/14825/20315/50908/24047/76293/50909/20311	12	12	-0.336282	Suppressed	-1.08997	0.355391	0.647588	0.625383	38	tags=33%, list=15%, signal=30%	Cxcl1/Rarres2/Ccl11/Cxcl10
TM2_BP_GO:0008015	TM2	BP	GO:0008015	blood circulation	TM2	18/239	438/15888	0.000116942	0.00955786	0.00783616	54409/11475/227753/71660/16598/83397/22003/13616/14683/50706/22339/59027/11600/23980/98660/13057/15902/14062	18	18	0.32689	Active	1.17178	0.270322	0.594682	0.574291	18	tags=22%, list=7%, signal=22%	Acta2/Postn/Tpm1/Nampt
TM2_BP_GO:0008217	TM2	BP	GO:0008217	regulation of blood pressure	TM2	12/239	169/15888	9.66e-06	0.00151026	0.00123821	54409/11475/71660/22003/13616/14683/50706/59027/98660/13057/15902/14062	12	12	0.473074	Active	1.48052	0.0791311	0.568985	0.549475	18	tags=33%, list=7%, signal=33%	Acta2/Postn/Tpm1/Nampt
TM2_BP_GO:0010038	TM2	BP	GO:0010038	response to metal ion	TM2	13/239	254/15888	0.000127884	0.00996602	0.00817079	16476/16477/14281/227753/16478/21825/14268/66871/14282/17748/11826/57320/15902	13	13	-0.239187	Suppressed	-0.793389	0.731243	0.855456	0.826124	75	tags=54%, list=29%, signal=40%	Cpne8/Mt1/Fos/Jund/Junb/Jun/Gsn
TM2_BP_GO:0018149	TM2	BP	GO:0018149	peptide cross-linking	TM1_TM2	5/239	23/15888	1.99e-05	0.00202277	0.0016584	12111/12825/21825/14268/13179	5	5	0.817599	Active	1.89642	0.00316393	0.439263	0.424202	25	tags=80%, list=10%, signal=74%	Thbs1/Col3a1/Fn1/Bgn
TM2_BP_GO:0019221	TM2	BP	GO:0019221	cytokine-mediated signaling pathway	TM2	17/239	327/15888	9.65e-06	0.00151026	0.00123821	15945/16362/16181/17874/20292/77125/12703/14825/13653/20315/68713/22234/15944/24047/11600/23849/20311	17	17	-0.294389	Suppressed	-1.08341	0.357577	0.647588	0.625383	10	tags=29%, list=4%, signal=30%	Myd88/Cxcl1/Irf1/Ccl11/Cxcl10
TM2_BP_GO:0019730	TM2	BP	GO:0019730	antimicrobial humoral response	TM2	8/239	75/15888	1.65e-05	0.00178521	0.00146364	15945/71660/20085/20292/14825/20315/24047/20311	8	8	-0.531637	Suppressed	-1.48784	0.0763142	0.568985	0.549475	38	tags=50%, list=15%, signal=44%	Cxcl1/Rarres2/Ccl11/Cxcl10
TM2_BP_GO:0030593	TM2	BP	GO:0030593	neutrophil chemotaxis	TM2	9/239	95/15888	1.3e-05	0.00160795	0.00131831	20750/15945/13616/20292/17242/14825/24047/12215/20311	9	9	-0.588848	Suppressed	-1.72077	0.0182815	0.496461	0.479439	6	tags=56%, list=2%, signal=56%	Edn3/Cxcl1/Ccl11/Spp1/Cxcl10
TM2_BP_GO:0030595	TM2	BP	GO:0030595	leukocyte chemotaxis	TM2	16/239	209/15888	1.11e-07	0.00017833	0.000146206	20750/15945/18654/71660/13616/21825/20085/20292/17242/14825/20315/22339/19242/24047/12215/20311	16	16	-0.500761	Suppressed	-1.79862	0.0119422	0.439263	0.424202	46	tags=50%, list=18%, signal=44%	Edn3/Cxcl1/Ptn/Rarres2/Pgf/Ccl11/Spp1/Cxcl10
TM2_BP_GO:0031640	TM2	BP	GO:0031640	killing of cells of other organism	TM2	8/239	48/15888	5.24e-07	0.00035102	0.000287789	15945/20085/17874/20292/14825/20315/24047/20311	8	8	-0.520588	Suppressed	-1.45692	0.0909275	0.568985	0.549475	40	tags=50%, list=16%, signal=44%	Myd88/Cxcl1/Ccl11/Cxcl10
TM2_BP_GO:0032103	TM2	BP	GO:0032103	positive regulation of response to external stimulus	TM2	17/239	375/15888	5.52e-05	0.00486463	0.00398834	15945/18654/71660/13616/21825/20085/14268/17242/77125/14825/20315/22339/19242/15944/57320/24047/13057	17	17	-0.338045	Suppressed	-1.24407	0.204988	0.588547	0.568367	46	tags=35%, list=18%, signal=31%	Edn3/Cxcl1/Ptn/Rarres2/Pgf/Cxcl10
TM2_BP_GO:0032760	TM2	BP	GO:0032760	positive regulation of tumor necrosis factor production	TM2	8/239	99/15888	0.000123001	0.00981375	0.00804596	12759/83397/21825/17874/77125/24047/13057/56490	8	8	0.518641	Active	1.41533	0.112665	0.568985	0.549475	9	tags=25%, list=3%, signal=25%	Clu/Thbs1
TM2_BP_GO:0042255	TM2	BP	GO:0042255	ribosome assembly	TM2	8/239	61/15888	3.45e-06	0.00105541	0.000865291	20103/67671/20085/16785/16898/27367/11837/110954	8	8	-0.256	Suppressed	-0.716443	0.80414	0.89315	0.862526	195	tags=100%, list=76%, signal=25%	Rps2/Rpl10/Rplp0/Rpsa/Rpl3/Rps19/Rps5
TM2_BP_GO:0042274	TM2	BP	GO:0042274	ribosomal small subunit biogenesis	TM2	7/239	72/15888	0.000102403	0.00857883	0.00703348	20103/67671/20085/16785/16898/20826/66481	7	7	-0.25498	Suppressed	-0.675231	0.853933	0.908341	0.877195	195	tags=100%, list=76%, signal=25%	Rps2/Rps21/Rpsa/Snu13/Rps19/Rps5
TM2_BP_GO:0043618	TM2	BP	GO:0043618	regulation of transcription from RNA polymerase II promoter in response to stress	TM2	7/239	46/15888	5.18e-06	0.00135887	0.00111409	16476/16598/11910/17872/81489/13653/22339	7	7	-0.672267	Suppressed	-1.78028	0.00837589	0.439263	0.424202	49	tags=71%, list=19%, signal=59%	Ppp1r15a/Dnajb1/Jun/Klf2/Atf3
TM2_BP_GO:0043620	TM2	BP	GO:0043620	regulation of DNA-templated transcription in response to stress	TM2	7/239	51/15888	1.05e-05	0.00151026	0.00123821	16476/16598/11910/17872/81489/13653/22339	7	7	-0.672267	Suppressed	-1.78028	0.00837589	0.439263	0.424202	49	tags=71%, list=19%, signal=59%	Ppp1r15a/Dnajb1/Jun/Klf2/Atf3
TM2_BP_GO:0045765	TM2	BP	GO:0045765	regulation of angiogenesis	TM2	17/239	274/15888	8.9e-07	0.000404826	0.000331903	15945/54409/18654/16598/21825/11504/14645/20292/17242/20692/12226/13179/22339/19242/11826/11852/21413	17	17	-0.429259	Suppressed	-1.57976	0.0431775	0.568985	0.549475	41	tags=41%, list=16%, signal=37%	Adamts1/Ptn/Klf2/Ramp2/Pgf/Ccl11/Cxcl10
TM2_BP_GO:0045785	TM2	BP	GO:0045785	positive regulation of cell adhesion	TM2	19/239	417/15888	1.87e-05	0.0019545	0.00160243	20750/16362/15205/16008/22003/21825/14268/17242/16007/17926/12703/20315/20194/22339/19242/67694/24047/11600/21950	19	19	0.336327	Active	1.22462	0.224548	0.588547	0.568367	17	tags=26%, list=7%, signal=27%	Igfbp2/Thbs1/Hes1/Fn1/Tpm1
TM2_BP_GO:0048661	TM2	BP	GO:0048661	positive regulation of smooth muscle cell proliferation	TM2	9/239	105/15888	2.91e-05	0.0028672	0.00235072	16476/21825/11504/17874/13653/22339/59027/13057/15902	9	9	0.328466	Active	0.933699	0.544685	0.763001	0.736839	18	tags=22%, list=7%, signal=21%	Thbs1/Nampt
TM2_BP_GO:0050673	TM2	BP	GO:0050673	epithelial cell proliferation	TM2	20/239	419/15888	5.64e-06	0.00135887	0.00111409	14734/16476/18654/15205/19378/21825/14645/20292/17242/20692/20315/22695/22339/19242/66117/67694/329941/13057/16601/15902	20	20	-0.327614	Suppressed	-1.26916	0.182472	0.588547	0.568367	31	tags=30%, list=12%, signal=29%	Ptn/Jun/Aldh1a2/Pgf/Gpc3/Ccl11
TM2_BP_GO:0050678	TM2	BP	GO:0050678	regulation of epithelial cell proliferation	TM2	18/239	357/15888	8e-06	0.00151026	0.00123821	14734/16476/18654/15205/19378/21825/14645/20292/17242/20692/20315/22695/22339/19242/66117/67694/13057/16601	18	18	-0.369089	Suppressed	-1.3843	0.109286	0.568985	0.549475	31	tags=33%, list=12%, signal=32%	Ptn/Jun/Aldh1a2/Pgf/Gpc3/Ccl11
TM2_BP_GO:0050900	TM2	BP	GO:0050900	leukocyte migration	TM2	19/239	337/15888	8.57e-07	0.000404826	0.000331903	20750/15945/18654/71660/13616/21825/20085/17874/20292/17242/77125/14825/20315/22339/19242/24047/12215/20311/17311	19	19	-0.485372	Suppressed	-1.85006	0.00779276	0.439263	0.424202	46	tags=47%, list=18%, signal=42%	Edn3/Myd88/Cxcl1/Ptn/Rarres2/Pgf/Ccl11/Spp1/Cxcl10
TM2_BP_GO:0050921	TM2	BP	GO:0050921	positive regulation of chemotaxis	TM2	11/239	140/15888	8.74e-06	0.00151026	0.00123821	15945/18654/71660/13616/21825/14268/17242/20315/22339/19242/24047	11	11	-0.409541	Suppressed	-1.28674	0.182732	0.588547	0.568367	46	tags=45%, list=18%, signal=39%	Edn3/Ptn/Rarres2/Pgf/Cxcl10
TM2_BP_GO:0051651	TM2	BP	GO:0051651	maintenance of location in cell	TM2	12/239	193/15888	3.64e-05	0.00338889	0.00277843	19241/15945/227753/19240/14325/67830/57320/24047/13167/13057/12314/14062	12	12	-0.314276	Suppressed	-1.01865	0.437229	0.700525	0.676505	18	tags=17%, list=7%, signal=16%	Gsn/Cxcl10
TM2_BP_GO:0060326	TM2	BP	GO:0060326	cell chemotaxis	TM2	16/239	281/15888	5.68e-06	0.00135887	0.00111409	20750/15945/18654/71660/13616/21825/20085/20292/17242/14825/20315/22339/19242/24047/12215/20311	16	16	-0.500761	Suppressed	-1.79862	0.0119422	0.439263	0.424202	46	tags=50%, list=18%, signal=44%	Edn3/Cxcl1/Ptn/Rarres2/Pgf/Ccl11/Spp1/Cxcl10
TM2_BP_GO:0061844	TM2	BP	GO:0061844	antimicrobial humoral immune response mediated by antimicrobial peptide	TM2	7/239	52/15888	1.2e-05	0.00154676	0.00126814	15945/20085/20292/14825/20315/24047/20311	7	7	-0.50653	Suppressed	-1.34138	0.150562	0.588547	0.568367	6	tags=43%, list=2%, signal=43%	Cxcl1/Ccl11/Cxcl10
TM2_BP_GO:0071241	TM2	BP	GO:0071241	cellular response to inorganic substance	TM2	12/239	170/15888	1.03e-05	0.00151026	0.00123821	16476/16477/14281/227753/16478/21825/14268/66871/14282/17748/11826/15902	12	12	-0.26127	Suppressed	-0.84684	0.654092	0.82276	0.794549	75	tags=58%, list=29%, signal=43%	Cpne8/Mt1/Fos/Jund/Junb/Jun/Gsn
TM2_BP_GO:0071248	TM2	BP	GO:0071248	cellular response to metal ion	TM2	11/239	148/15888	1.48e-05	0.00171316	0.00140456	16476/16477/14281/227753/16478/14268/66871/14282/17748/11826/15902	11	11	-0.358743	Suppressed	-1.12713	0.311936	0.619542	0.598298	75	tags=64%, list=29%, signal=47%	Cpne8/Mt1/Fos/Jund/Junb/Jun/Gsn
TM2_BP_GO:0071621	TM2	BP	GO:0071621	granulocyte chemotaxis	TM2	12/239	118/15888	2.13e-07	0.00017833	0.000146206	20750/15945/71660/13616/21825/20292/17242/14825/22339/24047/12215/20311	12	12	-0.495379	Suppressed	-1.60565	0.0410225	0.568985	0.549475	46	tags=50%, list=18%, signal=43%	Edn3/Cxcl1/Rarres2/Ccl11/Spp1/Cxcl10
TM2_BP_GO:0097529	TM2	BP	GO:0097529	myeloid leukocyte migration	TM2	16/239	204/15888	7.97e-08	0.00017833	0.000146206	20750/15945/18654/71660/13616/21825/20085/17874/20292/17242/14825/20315/22339/24047/12215/20311	16	16	-0.499667	Suppressed	-1.79469	0.0121517	0.439263	0.424202	46	tags=50%, list=18%, signal=44%	Edn3/Myd88/Cxcl1/Rarres2/Pgf/Ccl11/Spp1/Cxcl10
TM2_BP_GO:0097530	TM2	BP	GO:0097530	granulocyte migration	TM2	13/239	141/15888	2.1e-07	0.00017833	0.000146206	20750/15945/71660/13616/21825/17874/20292/17242/14825/22339/24047/12215/20311	13	13	-0.518212	Suppressed	-1.71892	0.0194357	0.500615	0.48345	46	tags=54%, list=18%, signal=47%	Edn3/Myd88/Cxcl1/Rarres2/Ccl11/Spp1/Cxcl10
TM2_BP_GO:1901342	TM2	BP	GO:1901342	regulation of vasculature development	TM2	17/239	278/15888	1.09e-06	0.000404826	0.000331903	15945/54409/18654/16598/21825/11504/14645/20292/17242/20692/12226/13179/22339/19242/11826/11852/21413	17	17	-0.429259	Suppressed	-1.57976	0.0431775	0.568985	0.549475	41	tags=41%, list=16%, signal=37%	Adamts1/Ptn/Klf2/Ramp2/Pgf/Ccl11/Cxcl10
TM2_BP_GO:1990266	TM2	BP	GO:1990266	neutrophil migration	TM2	10/239	115/15888	9.21e-06	0.00151026	0.00123821	20750/15945/13616/17874/20292/17242/14825/24047/12215/20311	10	10	-0.605977	Suppressed	-1.83527	0.00611122	0.439263	0.424202	46	tags=60%, list=18%, signal=51%	Edn3/Myd88/Cxcl1/Ccl11/Spp1/Cxcl10
TM2_CC_GO:0005604	TM2	CC	GO:0005604	basement membrane	TM1_TM2	12/247	113/16013	1.73e-07	7.58e-06	6.79e-06	23928/11504/16785/14268/20692/216616/12496/14118/22339/19242/329941/16773	12	12	0.175176	Active	0.551296	0.936034	0.983822	0.957444	45	tags=25%, list=17%, signal=22%	Fn1/Col8a2/Sparc
TM2_CC_GO:0005840	TM2	CC	GO:0005840	ribosome	TM1_TM2	18/247	214/16013	5.94e-09	3.47e-07	3.11e-07	20005/20102/20103/270106/19921/67671/100038882/20085/16785/20091/16898/27367/20084/11837/26961/66481/110954/68565	18	18	-0.266667	Suppressed	-0.986579	0.471459	0.977342	0.951137	195	tags=100%, list=76%, signal=26%	Rps2/Rpl10/Rps21/Rplp0/Mrps18a/Rps3a1/Rpl8/Rpsa/Rps18/Rpl19/Rpl3/Rpl13/Rps4x/Rpl9/Rps19/Rps5/Isg15
TM2_CC_GO:0015934	TM2	CC	GO:0015934	large ribosomal subunit	TM1_TM2	9/247	114/16013	6.78e-05	0.00211661	0.00189699	20005/270106/19921/67671/27367/11837/26961/110954/68565	9	9	0.285141	Active	0.806976	0.711116	0.983822	0.957444	187	tags=100%, list=72%, signal=29%	Rpl38/Rpl10/Rplp0/Mrps18a/Rpl8/Rpl19/Rpl3/Rpl13/Rpl9
TM2_CC_GO:0015935	TM2	CC	GO:0015935	small ribosomal subunit	TM1_TM2	10/247	75/16013	2.19e-07	8.51e-06	7.62e-06	20102/20103/100038882/20085/16785/20091/16898/20084/66481/68565	10	10	-0.298387	Suppressed	-0.899913	0.586151	0.983822	0.957444	185	tags=100%, list=72%, signal=29%	Rps21/Mrps18a/Rps3a1/Rpsa/Rps18/Rps4x/Rps19/Rps5/Isg15
TM2_CC_GO:0022625	TM2	CC	GO:0022625	cytosolic large ribosomal subunit	All	8/247	55/16013	1.86e-06	6.52e-05	5.85e-05	20005/270106/19921/67671/27367/11837/26961/110954	8	8	0.284	Active	0.773257	0.739053	0.983822	0.957444	187	tags=100%, list=72%, signal=28%	Rpl38/Rpl10/Rplp0/Rpl8/Rpl19/Rpl3/Rpl13/Rpl9
TM2_CC_GO:0022626	TM2	CC	GO:0022626	cytosolic ribosome	All	17/247	103/16013	3.22e-13	2.82e-11	2.53e-11	20005/20102/20103/270106/19921/67671/100038882/20085/16785/20091/16898/27367/20084/11837/26961/66481/110954	17	17	-0.26556	Suppressed	-0.966317	0.503796	0.983822	0.957444	195	tags=100%, list=76%, signal=26%	Rps2/Rpl10/Rps21/Rplp0/Rps3a1/Rpl8/Rpsa/Rps18/Rpl19/Rpl3/Rpl13/Rps4x/Rpl9/Rps19/Rps5/Isg15
TM2_CC_GO:0022627	TM2	CC	GO:0022627	cytosolic small ribosomal subunit	TM1_TM2	9/247	45/16013	2.33e-08	1.17e-06	1.05e-06	20102/20103/100038882/20085/16785/20091/16898/20084/66481	9	9	-0.321079	Suppressed	-0.93058	0.548114	0.983822	0.957444	76	tags=100%, list=29%, signal=73%	Rps21/Rps3a1/Rpsa/Rps18/Rps4x/Rps19/Rps5/Isg15
TM2_CC_GO:0030312	TM2	CC	GO:0030312	external encapsulating structure	All	40/247	447/16013	1.4e-19	1.63e-17	1.46e-17	14734/12111/72713/12825/71660/12816/17022/20200/23928/21825/11504/16785/29817/13717/14268/13602/50706/20692/216616/16007/78892/12496/17926/16012/68792/14264/16997/13179/20195/107250/50530/14118/20194/22339/19242/329941/11600/76293/16773/209378	40	40	0.31588	Active	1.40142	0.0885198	0.713069	0.69395	31	tags=30%, list=12%, signal=31%	Col12a1/Thbs1/Col3a1/Postn/Fn1/Eln/Fmod/Ltbp2/Bgn/Srpx2/Col8a2/Ccn1
TM2_CC_GO:0031012	TM2	CC	GO:0031012	extracellular matrix	All	40/247	446/16013	1.29e-19	1.63e-17	1.46e-17	14734/12111/72713/12825/71660/12816/17022/20200/23928/21825/11504/16785/29817/13717/14268/13602/50706/20692/216616/16007/78892/12496/17926/16012/68792/14264/16997/13179/20195/107250/50530/14118/20194/22339/19242/329941/11600/76293/16773/209378	40	40	0.31588	Active	1.40142	0.0885198	0.713069	0.69395	31	tags=30%, list=12%, signal=31%	Col12a1/Thbs1/Col3a1/Postn/Fn1/Eln/Fmod/Ltbp2/Bgn/Srpx2/Col8a2/Ccn1
TM2_CC_GO:0043209	TM2	CC	GO:0043209	myelin sheath	All	11/247	202/16013	0.000307445	0.00827735	0.0074185	22187/227753/14645/17926/14862/22142/23980/98660/12314/16832/11461	11	11	-0.414256	Suppressed	-1.29742	0.171799	0.827759	0.805565	86	tags=55%, list=33%, signal=38%	Atp1a2/Tuba1a/Glul/Ubb/Gsn/Myoc
TM2_CC_GO:0044391	TM2	CC	GO:0044391	ribosomal subunit	All	18/247	184/16013	5.22e-10	3.66e-08	3.28e-08	20005/20102/20103/270106/19921/67671/100038882/20085/16785/20091/16898/27367/20084/11837/26961/66481/110954/68565	18	18	-0.266667	Suppressed	-0.986579	0.471459	0.977342	0.951137	195	tags=100%, list=76%, signal=26%	Rps2/Rpl10/Rps21/Rplp0/Mrps18a/Rps3a1/Rpl8/Rpsa/Rps18/Rpl19/Rpl3/Rpl13/Rps4x/Rpl9/Rps19/Rps5/Isg15
TM2_CC_GO:0062023	TM2	CC	GO:0062023	collagen-containing extracellular matrix	All	39/247	338/16013	4.36e-23	1.53e-20	1.37e-20	14734/12111/72713/12825/71660/12816/17022/20200/23928/21825/11504/16785/29817/13717/14268/13602/50706/20692/216616/16007/12496/17926/16012/68792/14264/16997/13179/20195/107250/50530/14118/20194/22339/19242/329941/11600/76293/16773/209378	39	39	0.323691	Active	1.42723	0.0805332	0.713069	0.69395	31	tags=31%, list=12%, signal=32%	Col12a1/Thbs1/Col3a1/Postn/Fn1/Eln/Fmod/Ltbp2/Bgn/Srpx2/Col8a2/Ccn1
TM2_CC_GO:0098800	TM2	CC	GO:0098800	inner mitochondrial membrane protein complex	TM2_TM3	9/247	115/16013	7.26e-05	0.00211661	0.00189699	12867/407790/75406/68342/66377/66477/66091/21854/11958	9	9	0.334121	Active	0.945595	0.533782	0.983822	0.957444	61	tags=56%, list=24%, signal=44%	Ndufa3/Atp5md/Ndufc1/Atp5k/Cox7c
TM2_MF_GO:0001968	TM2	MF	GO:0001968	fibronectin binding	All	5/243	32/15758	0.000119916	0.00265014	0.00231627	21825/17926/16012/13038/22339	5	5	-0.54962	Suppressed	-1.28322	0.181978	0.636925	0.610142	9	tags=40%, list=3%, signal=39%	Igfbp6/Myoc
TM2_MF_GO:0003735	TM2	MF	GO:0003735	structural constituent of ribosome	All	17/243	150/15758	1.57e-10	3.48e-08	3.04e-08	20005/20102/20103/270106/19921/67671/20085/16785/20091/16898/27367/20084/11837/26961/66481/110954/68565	17	17	-0.26556	Suppressed	-0.968665	0.484549	0.872205	0.835529	195	tags=100%, list=76%, signal=26%	Rps2/Rpl10/Rps21/Rplp0/Mrps18a/Rps3a1/Rpl8/Rpsa/Rps18/Rpl19/Rpl3/Rpl13/Rps4x/Rpl9/Rps19/Rps5
TM2_MF_GO:0005125	TM2	MF	GO:0005125	cytokine activity	TM2	13/243	165/15758	1.69e-06	6.22e-05	5.44e-05	20750/15945/16181/20292/77125/14825/20315/22339/59027/24047/21950/20311/17311	13	13	-0.417355	Suppressed	-1.38769	0.118107	0.496049	0.475191	6	tags=23%, list=2%, signal=24%	Ccl11/Spp1/Cxcl10
TM2_MF_GO:0005126	TM2	MF	GO:0005126	cytokine receptor binding	TM2	15/243	228/15758	2.61e-06	8.88e-05	7.76e-05	15945/18654/16181/17874/20292/12070/77125/14825/20315/22339/24047/11600/21950/20311/17311	15	15	-0.332058	Suppressed	-1.16057	0.274089	0.740042	0.708923	40	tags=33%, list=16%, signal=30%	Myd88/Cxcl1/Pgf/Ccl11/Cxcl10
TM2_MF_GO:0005178	TM2	MF	GO:0005178	integrin binding	All	9/243	131/15758	0.000196441	0.00394667	0.00344946	20750/12825/21825/100038882/14268/16007/20315/14118/19242	9	9	0.364999	Active	1.04583	0.396514	0.842036	0.806628	31	tags=44%, list=12%, signal=41%	Thbs1/Col3a1/Fn1/Ccn1
TM2_MF_GO:0005200	TM2	MF	GO:0005200	structural constituent of cytoskeleton	TM2	7/243	57/15758	2.61e-05	0.000720395	0.000629638	22003/22142/22352/22146/11867/22151/11461	7	7	0.493044	Active	1.30177	0.172689	0.627659	0.601266	79	tags=71%, list=31%, signal=51%	Tpm1/Tuba1c/Vim/Actb/Arpc1b
TM2_MF_GO:0005201	TM2	MF	GO:0005201	extracellular matrix structural constituent	All	20/243	129/15758	8.42e-15	3.72e-12	3.25e-12	12111/12825/12816/17022/21825/29817/13717/14268/50706/20692/216616/16012/68792/16997/13179/50530/14118/329941/76293/16773	20	20	0.557268	Active	2.06183	0.00172546	0.272222	0.260775	30	tags=50%, list=12%, signal=48%	Col12a1/Thbs1/Col3a1/Postn/Fn1/Eln/Ltbp2/Bgn/Srpx2/Col8a2
TM2_MF_GO:0005518	TM2	MF	GO:0005518	collagen binding	TM1_TM2	7/243	68/15758	8.28e-05	0.0019265	0.0016838	17022/21825/13602/20692/13179/13038/11568	7	7	0.324932	Active	0.857911	0.631863	0.872205	0.835529	48	tags=43%, list=19%, signal=36%	Thbs1/Sparc/Aebp1
TM2_MF_GO:0005520	TM2	MF	GO:0005520	insulin-like growth factor binding	TM2_TM3	5/243	27/15758	5.12e-05	0.00133099	0.00116331	16008/29817/16007/16012/107250	5	5	0.464415	Active	1.08117	0.380204	0.825171	0.790472	31	tags=40%, list=12%, signal=36%	Igfbp2/Ccn1
TM2_MF_GO:0005539	TM2	MF	GO:0005539	glycosaminoglycan binding	All	16/243	188/15758	3.57e-08	3.16e-06	2.76e-06	15945/12111/22240/21825/11504/14268/17242/50706/16007/78892/14314/16997/13179/14118/22339/19242	16	16	0.462455	Active	1.60341	0.0437704	0.479861	0.459683	34	tags=50%, list=13%, signal=46%	Thbs1/Postn/Fn1/Dpysl3/Ltbp2/Bgn/Ccn1/Fstl1
TM2_MF_GO:0008009	TM2	MF	GO:0008009	chemokine activity	TM2	6/243	36/15758	1.67e-05	0.000527599	0.000461131	15945/20292/14825/20315/24047/20311	6	6	-0.549943	Suppressed	-1.37439	0.123766	0.497698	0.47677	6	tags=50%, list=2%, signal=50%	Cxcl1/Ccl11/Cxcl10
TM2_MF_GO:0008083	TM2	MF	GO:0008083	growth factor activity	TM2	9/243	115/15758	7.23e-05	0.00177541	0.00155174	18654/17242/216616/14825/20315/22339/19242/17311/66208	9	9	-0.441583	Suppressed	-1.28803	0.181837	0.636925	0.610142	115	tags=78%, list=45%, signal=45%	Vegfa/Mdk/Cxcl12/Efemp1/Cxcl1/Ptn/Pgf
TM2_MF_GO:0008201	TM2	MF	GO:0008201	heparin binding	All	13/243	143/15758	3.28e-07	2.07e-05	1.81e-05	15945/21825/11504/14268/17242/50706/16007/78892/14314/16997/14118/22339/19242	13	13	0.40935	Active	1.32254	0.15902	0.601096	0.575821	34	tags=46%, list=13%, signal=42%	Thbs1/Postn/Fn1/Ltbp2/Ccn1/Fstl1
TM2_MF_GO:0019838	TM2	MF	GO:0019838	growth factor binding	All	14/243	135/15758	2.16e-08	2.38e-06	2.08e-06	12825/16008/21825/20085/16181/29817/16898/16007/16012/68792/16997/107250/22339/19242	14	14	0.59455	Active	1.96315	0.00544218	0.272222	0.260775	31	tags=50%, list=12%, signal=47%	Il1rn/Igfbp2/Thbs1/Col3a1/Ltbp2/Srpx2/Ccn1
TM2_MF_GO:0019843	TM2	MF	GO:0019843	rRNA binding	TM1_TM2	10/243	70/15758	1.11e-07	8.21e-06	7.18e-06	20005/20102/20103/19921/27367/20084/11837/26961/22117/68565	10	10	-0.322581	Suppressed	-0.973337	0.48418	0.872205	0.835529	179	tags=100%, list=69%, signal=32%	Mrps18a/Tst/Rpl8/Rps18/Rpl19/Rpl3/Rps4x/Rpl9/Rps5
TM2_MF_GO:0030545	TM2	MF	GO:0030545	receptor regulator activity	TM2	21/243	396/15758	9.1e-07	3.66e-05	3.2e-05	20750/15945/18654/13616/16181/20292/17242/110074/216616/77125/14825/20315/14118/22339/19242/59027/24047/21950/20311/17311/66208	21	21	-0.350114	Suppressed	-1.37191	0.115143	0.496049	0.475191	50	tags=38%, list=19%, signal=33%	Efemp1/Edn3/Cxcl1/Ptn/Pgf/Ccl11/Spp1/Cxcl10
TM2_MF_GO:0030546	TM2	MF	GO:0030546	signaling receptor activator activity	TM2	20/243	361/15758	8.49e-07	3.66e-05	3.2e-05	20750/15945/18654/13616/16181/20292/17242/216616/77125/14825/20315/14118/22339/19242/59027/24047/21950/20311/17311/66208	20	20	-0.366965	Suppressed	-1.41924	0.0961137	0.496049	0.475191	50	tags=40%, list=19%, signal=35%	Efemp1/Edn3/Cxcl1/Ptn/Pgf/Ccl11/Spp1/Cxcl10
TM2_MF_GO:0042379	TM2	MF	GO:0042379	chemokine receptor binding	TM2	6/243	55/15758	0.000194794	0.00394667	0.00344946	15945/20292/14825/20315/24047/20311	6	6	-0.549943	Suppressed	-1.37439	0.123766	0.497698	0.47677	6	tags=50%, list=2%, signal=50%	Cxcl1/Ccl11/Cxcl10
TM2_MF_GO:0045236	TM2	MF	GO:0045236	CXCR chemokine receptor binding	TM2	4/243	12/15758	2.48e-05	0.000720395	0.000629638	15945/14825/20315/20311	4	4	-0.497452	Suppressed	-1.07181	0.384206	0.825171	0.790472	38	tags=50%, list=15%, signal=43%	Cxcl1/Cxcl10
TM2_MF_GO:0048018	TM2	MF	GO:0048018	receptor ligand activity	TM2	20/243	356/15758	6.83e-07	3.66e-05	3.2e-05	20750/15945/18654/13616/16181/20292/17242/216616/77125/14825/20315/14118/22339/19242/59027/24047/21950/20311/17311/66208	20	20	-0.366965	Suppressed	-1.41924	0.0961137	0.496049	0.475191	50	tags=40%, list=19%, signal=35%	Efemp1/Edn3/Cxcl1/Ptn/Pgf/Ccl11/Spp1/Cxcl10
TM2_MF_GO:0050839	TM2	MF	GO:0050839	cell adhesion molecule binding	All	13/243	271/15758	0.000307274	0.00590501	0.00516108	20750/12825/21825/100038882/16785/14268/50706/16007/20315/14118/19242/54366/12215	13	13	0.403393	Active	1.3033	0.170684	0.627659	0.601266	36	tags=46%, list=14%, signal=42%	Thbs1/Col3a1/Postn/Fn1/Ccn1/Ctnnal1
TM2_MF_GO:0050840	TM2	MF	GO:0050840	extracellular matrix binding	All	10/243	58/15758	1.72e-08	2.38e-06	2.08e-06	20750/12111/21825/16785/13717/13602/20692/16007/13179/22339	10	10	0.379375	Active	1.12747	0.304331	0.792035	0.75873	45	tags=50%, list=17%, signal=43%	Thbs1/Eln/Bgn/Ccn1/Sparc
TM2_MF_GO:1901681	TM2	MF	GO:1901681	sulfur compound binding	All	16/243	238/15758	9.04e-07	3.66e-05	3.2e-05	15945/22240/21825/11504/14268/17242/50706/16007/78892/14314/16997/14862/14118/22339/19242/13167	16	16	0.428764	Active	1.4866	0.0787099	0.496049	0.475191	41	tags=50%, list=16%, signal=45%	Thbs1/Postn/Fn1/Dpysl3/Ltbp2/Ccn1/Fstl1/Dbi
TM3_BP_GO:0001503	TM3	BP	GO:0001503	ossification	TM3	14/147	365/15888	7.48e-06	0.00516913	0.00445725	14219/17242/66695/16011/67671/15081/16477/19242/225998/14683/16007/16478/20750/68713	14	14	0.349378	Active	1.23624	0.211542	0.45346	0.378359	12	tags=29%, list=8%, signal=29%	Ccn2/Aspn/Igfbp5/Ccn1
TM3_BP_GO:0010257	TM3	BP	GO:0010257	NADH dehydrogenase complex assembly	TM3	6/147	48/15888	5.05e-06	0.00514309	0.00443479	69875/67264/67130/68375/66916/68198	6	6	0.396104	Active	1.03175	0.410454	0.61202	0.510659	99	tags=100%, list=62%, signal=40%	Ndufb2/Ndufa6/Ndufb7/Ndufa8/Ndufa11/Ndufb8
TM3_BP_GO:0032981	TM3	BP	GO:0032981	mitochondrial respiratory chain complex I assembly	TM3	6/147	48/15888	5.05e-06	0.00514309	0.00443479	69875/67264/67130/68375/66916/68198	6	6	0.396104	Active	1.03175	0.410454	0.61202	0.510659	99	tags=100%, list=62%, signal=40%	Ndufb2/Ndufa6/Ndufb7/Ndufa8/Ndufa11/Ndufb8
TM3_BP_GO:0046034	TM3	BP	GO:0046034	ATP metabolic process	TM3	11/147	217/15888	5.58e-06	0.00514309	0.00443479	15937/56312/12628/14433/14004/11949/57320/98660/67264/16828/68375	11	11	-0.353425	Suppressed	-1.12188	0.320721	0.537257	0.448278	80	tags=82%, list=50%, signal=44%	Ndufa8/Ldha/Ndufb8/Park7/Gapdh/Atp1a2/Atp5c1/Ier3/Nupr1
TM3_CC_GO:0005746	TM3	CC	GO:0005746	mitochondrial respirasome	TM3	6/157	67/16013	4.92e-05	0.00130331	0.00113376	69875/67264/67130/68375/66916/68198	6	6	0.396104	Active	1.0274	0.41606	0.936428	0.920786	99	tags=100%, list=62%, signal=40%	Ndufb2/Ndufa6/Ndufb7/Ndufa8/Ndufa11/Ndufb8
TM3_CC_GO:0005747	TM3	CC	GO:0005747	mitochondrial respiratory chain complex I	TM3	6/157	41/16013	2.73e-06	0.000103476	9e-05	69875/67264/67130/68375/66916/68198	6	6	0.396104	Active	1.0274	0.41606	0.936428	0.920786	99	tags=100%, list=62%, signal=40%	Ndufb2/Ndufa6/Ndufb7/Ndufa8/Ndufa11/Ndufb8
TM3_CC_GO:0022625	TM3	CC	GO:0022625	cytosolic large ribosomal subunit	All	5/157	55/16013	0.000199142	0.00405944	0.00353135	67671/67281/19988/66489/19934	5	5	0.754839	Active	1.84118	0.00481444	0.073092	0.0718711	43	tags=100%, list=27%, signal=75%	Rpl6/Rpl38/Rpl37/Rpl22/Rpl35
TM3_CC_GO:0022626	TM3	CC	GO:0022626	cytosolic ribosome	All	8/157	103/16013	7.72e-06	0.00025573	0.000222463	67671/67281/19988/67427/20088/78294/66489/19934	8	8	0.756579	Active	2.18597	0.000615764	0.0128541	0.0126394	45	tags=100%, list=28%, signal=76%	Rpl6/Rpl38/Rpl37/Rpl22/Rps20/Rpl35/Rps24/Rps27a
TM3_CC_GO:0030312	TM3	CC	GO:0030312	external encapsulating structure	All	22/157	447/16013	4.62e-10	4.08e-08	3.55e-08	14219/21825/66695/18295/12111/29817/19242/545370/13717/20200/22420/18073/21859/16007/12825/50706/16997/17022/209378/13010/14264/68792	22	22	0.589266	Active	2.43504	0.000206441	0.0114919	0.0112999	35	tags=68%, list=22%, signal=62%	Ccn2/Thbs1/Aspn/Eln/Ogn/Hmcn1/Bgn/Ccn1/Col3a1/Postn/Timp3/Fmod/Igfbp7/S100a6/Ltbp2
TM3_CC_GO:0030964	TM3	CC	GO:0030964	NADH dehydrogenase complex	TM3	6/157	41/16013	2.73e-06	0.000103476	9e-05	69875/67264/67130/68375/66916/68198	6	6	0.396104	Active	1.0274	0.41606	0.936428	0.920786	99	tags=100%, list=62%, signal=40%	Ndufb2/Ndufa6/Ndufb7/Ndufa8/Ndufa11/Ndufb8
TM3_CC_GO:0031012	TM3	CC	GO:0031012	extracellular matrix	All	22/157	446/16013	4.43e-10	4.08e-08	3.55e-08	14219/21825/66695/18295/12111/29817/19242/545370/13717/20200/22420/18073/21859/16007/12825/50706/16997/17022/209378/13010/14264/68792	22	22	0.589266	Active	2.43504	0.000206441	0.0114919	0.0112999	35	tags=68%, list=22%, signal=62%	Ccn2/Thbs1/Aspn/Eln/Ogn/Hmcn1/Bgn/Ccn1/Col3a1/Postn/Timp3/Fmod/Igfbp7/S100a6/Ltbp2
TM3_CC_GO:0043209	TM3	CC	GO:0043209	myelin sheath	All	13/157	202/16013	9.62e-08	6.38e-06	5.55e-06	22187/268373/12313/14433/11949/12709/12314/98660/78294/21881/22334/16832/68585	13	13	-0.30933	Suppressed	-1.04814	0.399334	0.936428	0.920786	99	tags=100%, list=62%, signal=41%	Ppia/Tkt/Rtn4/Calm2/Vdac2/Ldhb/Calm1/Gapdh/Ckb/Atp1a2/Atp5c1/Ubb
TM3_CC_GO:0044391	TM3	CC	GO:0044391	ribosomal subunit	All	8/157	184/16013	0.000465138	0.00821744	0.00714844	67671/67281/19988/67427/20088/78294/66489/19934	8	8	0.756579	Active	2.18597	0.000615764	0.0128541	0.0126394	45	tags=100%, list=28%, signal=76%	Rpl6/Rpl38/Rpl37/Rpl22/Rps20/Rpl35/Rps24/Rps27a
TM3_CC_GO:0045271	TM3	CC	GO:0045271	respiratory chain complex I	TM3	6/157	41/16013	2.73e-06	0.000103476	9e-05	69875/67264/67130/68375/66916/68198	6	6	0.396104	Active	1.0274	0.41606	0.936428	0.920786	99	tags=100%, list=62%, signal=40%	Ndufb2/Ndufa6/Ndufb7/Ndufa8/Ndufa11/Ndufb8
TM3_CC_GO:0062023	TM3	CC	GO:0062023	collagen-containing extracellular matrix	All	20/157	338/16013	1.23e-10	3.26e-08	2.83e-08	21825/66695/18295/12111/29817/19242/545370/13717/20200/18073/21859/16007/12825/50706/16997/17022/209378/13010/14264/68792	20	20	0.597114	Active	2.39578	0.000204248	0.0114919	0.0112999	35	tags=70%, list=22%, signal=62%	Thbs1/Aspn/Eln/Ogn/Hmcn1/Bgn/Ccn1/Col3a1/Postn/Timp3/Fmod/Igfbp7/S100a6/Ltbp2
TM3_CC_GO:0070469	TM3	CC	GO:0070469	respirasome	TM3	6/157	73/16013	7.99e-05	0.00192572	0.00167521	69875/67264/67130/68375/66916/68198	6	6	0.396104	Active	1.0274	0.41606	0.936428	0.920786	99	tags=100%, list=62%, signal=40%	Ndufb2/Ndufa6/Ndufb7/Ndufa8/Ndufa11/Ndufb8
TM3_CC_GO:0098800	TM3	CC	GO:0098800	inner mitochondrial membrane protein complex	TM2_TM3	7/157	115/16013	0.000137658	0.00303995	0.00264448	11949/69875/67264/67130/68375/66916/68198	7	7	-0.372549	Suppressed	-1.00212	0.453171	0.936428	0.920786	104	tags=100%, list=65%, signal=37%	Ndufa6/Ndufb7/Ndufa8/Ndufa11/Ndufb8/Atp5c1
TM3_CC_GO:0098803	TM3	CC	GO:0098803	respiratory chain complex	TM3	6/157	66/16013	4.51e-05	0.00130331	0.00113376	69875/67264/67130/68375/66916/68198	6	6	0.396104	Active	1.0274	0.41606	0.936428	0.920786	99	tags=100%, list=62%, signal=40%	Ndufb2/Ndufa6/Ndufb7/Ndufa8/Ndufa11/Ndufb8
TM3_CC_GO:1990204	TM3	CC	GO:1990204	oxidoreductase complex	TM3	6/157	96/16013	0.000361843	0.00684916	0.00595816	69875/67264/67130/68375/66916/68198	6	6	0.396104	Active	1.0274	0.41606	0.936428	0.920786	99	tags=100%, list=62%, signal=40%	Ndufb2/Ndufa6/Ndufb7/Ndufa8/Ndufa11/Ndufb8
TM3_MF_GO:0001968	TM3	MF	GO:0001968	fibronectin binding	All	4/150	32/15758	0.000230499	0.00668446	0.00556028	14219/21825/16011/13038	4	4	0.856913	Active	1.90907	0.00178218	0.0591683	0.0514018	7	tags=75%, list=4%, signal=74%	Ccn2/Thbs1/Igfbp5
TM3_MF_GO:0003735	TM3	MF	GO:0003735	structural constituent of ribosome	All	8/150	150/15758	9.41e-05	0.00327315	0.00272267	67671/67281/19988/67427/20088/78294/66489/19934	8	8	0.756579	Active	2.18374	0.000201654	0.0112718	0.00979225	45	tags=100%, list=28%, signal=76%	Rpl6/Rpl38/Rpl37/Rpl22/Rps20/Rpl35/Rps24/Rps27a
TM3_MF_GO:0005178	TM3	MF	GO:0005178	integrin binding	All	8/150	131/15758	3.6e-05	0.00156687	0.00130335	14219/21825/19242/268373/16007/12825/22329/20750	8	8	0.550818	Active	1.58985	0.0481952	0.280661	0.243821	14	tags=50%, list=9%, signal=48%	Ccn2/Thbs1/Ccn1/Col3a1
TM3_MF_GO:0005201	TM3	MF	GO:0005201	extracellular matrix structural constituent	All	13/150	129/15758	2.85e-10	9.9e-08	8.24e-08	21825/66695/18295/12111/29817/545370/13717/18073/12825/50706/16997/17022/68792	13	13	0.683946	Active	2.36218	0.000203707	0.0112718	0.00979225	16	tags=62%, list=10%, signal=60%	Thbs1/Aspn/Eln/Ogn/Hmcn1/Bgn/Col3a1/Postn
TM3_MF_GO:0005520	TM3	MF	GO:0005520	insulin-like growth factor binding	TM2_TM3	5/150	27/15758	4.98e-06	0.000346884	0.000288546	14219/16011/29817/16007/16008	5	5	0.832258	Active	2.0155	0.000990295	0.0410972	0.0357027	31	tags=100%, list=19%, signal=83%	Ccn2/Igfbp5/Ccn1/Igfbp7/Igfbp2
TM3_MF_GO:0005539	TM3	MF	GO:0005539	glycosaminoglycan binding	All	11/150	188/15758	1.84e-06	0.000212867	0.000177067	14219/17242/21825/12111/19242/268373/12628/16007/50706/19934/16997	11	11	0.565519	Active	1.8405	0.0111449	0.142312	0.123632	17	tags=55%, list=11%, signal=52%	Ccn2/Thbs1/Bgn/Ccn1/Postn/Cfh
TM3_MF_GO:0008201	TM3	MF	GO:0008201	heparin binding	All	9/150	143/15758	9.1e-06	0.000527584	0.000438855	14219/17242/21825/19242/12628/16007/50706/19934/16997	9	9	0.54186	Active	1.63908	0.0390342	0.247909	0.215368	17	tags=56%, list=11%, signal=53%	Ccn2/Thbs1/Ccn1/Postn/Cfh
TM3_MF_GO:0019838	TM3	MF	GO:0019838	growth factor binding	All	11/150	135/15758	6.55e-08	1.14e-05	9.48e-06	14219/21825/16011/29817/67281/19242/16007/12825/16008/16997/68792	11	11	0.57871	Active	1.88343	0.0077001	0.106518	0.0925363	40	tags=82%, list=25%, signal=66%	Ccn2/Thbs1/Igfbp5/Ccn1/Col3a1/Igfbp7/Igfbp2/Ltbp2/Rpl37
TM3_MF_GO:0031386	TM3	MF	GO:0031386	protein tag	TM3	3/150	11/15758	0.000131899	0.00417279	0.00347102	22187/78294/170930	3	3	-0.393717	Suppressed	-0.765183	0.789124	0.871046	0.756711	23	tags=100%, list=14%, signal=87%	Sumo2/Ubb
TM3_MF_GO:0050839	TM3	MF	GO:0050839	cell adhesion molecule binding	All	11/150	271/15758	5.73e-05	0.00221677	0.00184396	14219/21825/19242/268373/16007/12825/19266/50706/22329/20750/68585	11	11	0.518731	Active	1.68823	0.024924	0.243376	0.21143	16	tags=45%, list=10%, signal=44%	Ccn2/Thbs1/Ccn1/Col3a1/Postn
TM3_MF_GO:0050840	TM3	MF	GO:0050840	extracellular matrix binding	All	6/150	58/15758	1.81e-05	0.000900576	0.000749118	21825/12111/13717/18073/16007/20750	6	6	0.711668	Active	1.84844	0.00756821	0.106518	0.0925363	12	tags=67%, list=8%, signal=64%	Thbs1/Eln/Bgn/Ccn1
TM3_MF_GO:1901681	TM3	MF	GO:1901681	sulfur compound binding	All	12/150	238/15758	2.93e-06	0.000255059	0.000212164	14219/17242/21825/19242/21366/268373/12628/16007/21881/50706/19934/16997	12	12	0.522414	Active	1.74978	0.0184959	0.204688	0.177821	19	tags=50%, list=12%, signal=48%	Ccn2/Thbs1/Ccn1/Postn/Cfh/Slc6a6
