# Supplementary material for: Single-cell profiling of trabecular meshwork identifies mitochondrial dysfunction in a glaucoma model that is protected by vitamin B3 treatment
Source: eLife. 2026 Jan 20;14:RP107161. doi: 10.7554/eLife.107161 (PMC12818872; doi:10.7554/eLife.107161)
Supplement: Supplementary file 7. [file elife-107161-supp7.xlsx]

## Sheet: File 7
Age (mo)	Lmx1b_genotype	Treatment	Mean	Standard_deviation
2	WT	Unt	13.0034	1.42614
2	WT	NAM	12.2769	1.05897
2	V265D/+	Unt	19.7029	6.71025
2	V265D/+	NAM	15.8662	4.24322
3	WT	Unt	13.0914	1.49026
3	WT	NAM	11.9918	1.11814
3	V265D/+	Unt	20.3657	6.92214
3	V265D/+	NAM	15.6431	3.83708
